# Supplementary material for: Biomarker Expression of Peri-Implantitis Lesions before and after Treatment: A Systematic Review
Source: MDPI journal article supplement (doi:10.3390/ijerph192114085), 2022-10-28
Supplement: s1 [file s1]

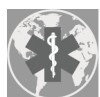

*Systematic review*

**Biomarker Expression of Peri-Implantitis Lesions Before and After Treatment: A Systematic Review.**

**Supplemental Table S4.** Excluded studies (title, author and publication year) following eligibility criteria assessment.

| Study not in English                                                                                                                                                                 |                                                                                                                                                                       |                  |
|--------------------------------------------------------------------------------------------------------------------------------------------------------------------------------------|-----------------------------------------------------------------------------------------------------------------------------------------------------------------------|------------------|
| Title                                                                                                                                                                                | Author                                                                                                                                                                | Publication Year |
| Differenzierte Untersuchung der lokalen und systemischen Entzündungsreaktionen nach Implantation von Niedertemperatur-Plasmapolymer-modifizierten Titanplättchen im Tiermodell Ratte | Walschus, Uwe                                                                                                                                                         | 2013             |
| Avaliação comparativa da microinfiltração bacteriológica na interface pilar/implante em implantes hexágono externo com 10 e 20 Ncm de torque                                         | Neves, Flávio Domingues; Carneiro, Thiago de Almeida Prado Naves; Prudente, Marcel Santana; Neto, João Paulo Silva; Penatti, Mário Paulo Amante; Prado, Ricardo Alves | 2010             |
| Orale Rehabilitation eines atrophischen Oberkiefers mit intraoralen Knochentransplantaten                                                                                            | Berthold, Michael; Doliveux, Romain; Khoury, Fouad                                                                                                                    |                  |
| Carga inmediata en implantes dentales                                                                                                                                                | Concejo Cútoli, C.; Montesdeoca García, N.                                                                                                                            | 2005             |
| Procjena stabilnosti implantata nakon podizanja dna sinusa i primjene različitih nadomjesnih materijala                                                                              | Jelušić, Damir; Puhar, Ivan; Plančak, Darije                                                                                                                          | 2014             |
| CHARAKTERISIERUNG POTENTIELLER                                                                                                                                                       | HINSICHTLICH, KNOCHENERSATZ; EIGENSCHAFTEN, ZYTOTOXISCHER                                                                                                             |                  |
| Ocena własności fizycznych i biologicznych samoorganizującego się biomateriału otrzymanego z chitozanu/fosforanu wapnia/alginianu do zastosowań stomatologicznych                    | Kucharska, MARTYNA; Bubak, GRZEGORZ; Kowalczyk, MAGDALENA; Bojar, WITOLD; Brynk, TOMASZ; Koperski, ŁUKASZ; Ciach, TOMASZ                                              | 2011             |
| Actae of the 54 Congrès du GRSO (Montpellier, 2010)                                                                                                                                  | Céspedes, Maria Cristina Manzanares                                                                                                                                   | 2010             |
| Biverkningar av dentala implantat i titan och zirkoniumdioxid: en systematisk översikt av vetenskapliga studier                                                                      | Berglund, Anders; Konradsson, Katarina                                                                                                                                | 2014             |
| Der Einfluss des Implantat Designs von Mini Dental Implants auf die Belastung der umgebenden Knochenstruktur: eine Finite-Elemente-Analyse                                           | Toth, Arpad Alexander                                                                                                                                                 | 2018             |
| Marginální přesnost tří typů keramických abutmentů                                                                                                                                   | Baldassarri, Marta; Hjerpe, Jenni; Romeo, Davide; Fickl, Stefan; Thompson, Van P.; Stappert, Christian FJ                                                             |                  |
| AðIZ 0Ç0 CANDIDA ENFEKSİYONLARI VE TEDAVİSİ                                                                                                                                          | ÖNDER, Canan                                                                                                                                                          |                  |
| 세라믹과 지르코니아의 골유착에 관한 고찰                                                                                                                                                               | 송영균                                                                                                                                                                   | 2012             |
| Dentala kompositmaterials inverkan på a närliggande celler.                                                                                                                          | Nikolovska, Emilia; Rivera, Maria                                                                                                                                     | 2011             |
| DA Deporter                                                                                                                                                                          | Campelo, L. Dominguez                                                                                                                                                 | 2002             |
| Síndrome de colapso de mordida posterior                                                                                                                                             | Baldión, Paula Alejandra; Castro, Diego Enrique Betancourt                                                                                                            | 2012             |
| 牙种植体的生物力学研究.                                                                                                                                                                         | 甘雪琦; 肖宇; 马瑞阳; 黄椿棚; 吴尧; 杨帮成; 杨齐; 包崇云; 于海洋                                                                                                                              | 2019             |
| Rehabilitación del maxilar superior con atrofia severa horizontal utilizando implantes dentales palatinizados.                                                                       | Candel Martí, Eugenia                                                                                                                                                 | 2016             |
| Evaluación de la micro-deformación de la zona maxilar anterior con regeneración. Análisis de elementos finitos                                                                       | Henao, Johan Ivan Aguilar; Ossa, Junes Abdul Villarraga; Correa, Federico Latorre                                                                                     |                  |
| Durchmesserreduzierte Implantate Eine Übersicht                                                                                                                                      | Schiegnitz, Eik; Al-Nawas, Bilal                                                                                                                                      | 2013             |
| Reabilitação de maxila atrofica sem uso de abordagem reconstrutiva. Relato de caso.                                                                                                  | Tabosa e Silva, Tércio Pessoa; Miranda, Caio César Leite                                                                                                              | 2014             |
| BIOFILM W ORTOPEDII ORAZ W CHIRURGII SZCZĘKOWOTWARZOWEJ–ZNACZENIE ZJAWISKA I MODYFIKACJE BIOMATERIAŁÓW OGRANICZAJĄCE CZĘSTOŚĆ ZAKAŻEŃ.                                               | REETZ, ANDRZEJ; JUNK, ADAM; BARTOSZEWICZ, MARZENNA                                                                                                                    | 2016             |
| Anàlisi numèrica de tensions i deformacions en un implant dental                                                                                                                     | Serra Cantarell, Anna; Sarrà Paloma, Maria                                                                                                                            | 2017             |
| Análisis de la pérdida marginal ósea temprana en implantes colocados en hueso injertado frente a implantes colocados en hueso pristino                                               | Fernández Jiménez, Andrés                                                                                                                                             | 2016             |
| チタンの超親水性処理がラミニン 332 の吸着特性に及ぼす影響                                                                                                                                                      | 柴垣博一; 野本秀材; 野村智義; 老川秀紀; 吉成正雄                                                                                                                                          | 2018             |
| Lifetime Achievement Award—2005 Prix de mérite à vie—2005                                                                                                                            | Simmons, Edward Henry                                                                                                                                                 | 1982             |
| Comportamento do biofilme bacteriano em superfícies de implantes com diferentes tratamentos de superfície                                                                            | Castro, Maura Filipa Fernandes de                                                                                                                                     | 2019             |
| Rugosidad superficial del zirconio para implantes dentarios y la adhesión de biofilm                                                                                                 | Butler, Teresa Adela; Lazo, Sergio Daniel; Basal, Roxana Lía; Escudero Giachella, Ezequiel; Friso, Nélida Ester;                                                      | 2014             |

|                                                                                                                                                                     |                                                                                                                                                               |      |
|---------------------------------------------------------------------------------------------------------------------------------------------------------------------|---------------------------------------------------------------------------------------------------------------------------------------------------------------|------|
| Etiologia zakażeń okołowszczepowych w implantologii stomatologicznej cz. 2-rola właściwości fizykochemicznych powierzchni implantu                                  | Viscovich, Cristina; Alfaro, Gabriel Enrique; Amaro, Emilio Gustavo; Merlo, Diego; Belloni, Federico i Ceramiki, Wydział Inżynierii Materiałowej              |      |
| A influência do tabagismo na aposição óssea peri-implantar ao redor de micro-implantes removidos de maxilares humanos.                                              | FERREIRA, José Divino Bezerra                                                                                                                                 | 2012 |
| Evaluación clínica del porcentaje de éxito de implantes realizados en la Facultad de Odontología de Universidad Andrés Bello según el criterio de pisa del año 2009 | Leyton Sepúlveda, Rubén Alejandro                                                                                                                             | 2015 |
| Quais as indicações para membranas absorvíveis e não absorvíveis?                                                                                                   | Benfatti, César Augusto                                                                                                                                       |      |
| Caracterización morfológica y Evaluación clínica de sustitutos óseos de origen porcino de la casa 3Biomat para su aplicación en lesiones óseas bimaxilares          | Nausa, Julian Gallón; Haiek, Diego Ernesto Castro                                                                                                             | 2017 |
| 최후방 하악 구치 임플란트 지지 단일 수복물에서 인접치와의 거리가 합병증에 미치는 영향                                                                                                                    | 신혜승; 김명래; 이재훈                                                                                                                                                 | 2009 |
| Pedro Martín Vera Juan Manuel Aragonese Lamas                                                                                                                       | Lamas, Juan Manuel Aragonese                                                                                                                                  | 2012 |
| ПЕРИИМПЛАНТИТ—ОСНОВНОЕ ОСЛОЖНЕНИЕ ДЕНТАЛЬНОЙ ИМПЛАНТАЦИИ (ОБЗОР ЛИТЕРАТУРЫ)                                                                                         | Блинова, А. В.; Рюмшин, Р. А.; Румянцев, В. А.                                                                                                                |      |
| Importancia de la pérdida marginal ósea como criterio de éxito en implantología a corto plazo                                                                       | León Cano, Ana Isabel                                                                                                                                         | 2016 |
| POLIETER ETER KETON (PEEK) ve DENTAL KULLANIMI                                                                                                                      | ÇULHAOĞLU, Ahmet Kürşat; ÖZKIR, Serhat Emre; TÜRKAL, Fatoş                                                                                                    |      |
| Implante imediato com provisionalização imediata através de cicatrizador multifuncional de PEEK                                                                     | Passoni, Bernardo Born; Venâncio, Fernanda; Formiga, Márcio de Carvalho; Schuldt Filho, Guenther; Magini, Ricardo de Souza; Benfatti, César Augusto Magalhães | 2017 |
| Análise fotoelástica da distribuição de tensões peri-implantares em overdenture mandibular retida por implante unitário com diferentes tipos de conexão             | Nascimento, João Francisco Machado do                                                                                                                         | 2013 |
| Utjecaj socijalno-ekonomskog statusa, pušenja i zdravstvenog statusa pacijenata na neuspjeh implantološke terapije                                                  | Chatzopoulos, Georgios S.; Wolff, Larry F.                                                                                                                    | 2018 |
| Dental İmplant Yüzey Özellikleri ve Biyolojik Ortamla Etkileşimler: Bölüm II: İmplant Yüzeyleri ve Özellikleri                                                      | KILINÇ, Yeliz; ERGÜVEN, Sara SAMUR; ERKMEN, Erkan                                                                                                             |      |
| Biofunctionalization of Titanium Granules with Simvastatin for Improving Osteogenic Activity and Antibacterial Properties (Ex Vivo Study).                          | Karaji, Zahra Gorgin; Houshmand, Behzad; Abbasi, Shahsanam; Shafiei, Sara; Faghihi, Shahab                                                                    | 2017 |
| Sofortfunktion in der zahnärztlichen Praxis                                                                                                                         | Siebers, D.; Gehrke, P.; Schliephake, H.                                                                                                                      | 2011 |
| Seleção do diâmetro do implante em alvéolos pós-exodontia: uma nova abordagem.                                                                                      | da ROSA, José Carlos Martins; Rosa, Ariádene Cristina Pértile de Oliveira; Francischone, Carlos Eduardo; Sotto-Maior, Bruno Salles                            | 2014 |
| Influência do fenótipo gengival na saúde e na estética peri-implantar                                                                                               | Mata, Vanessa Couto da                                                                                                                                        | 2017 |
| Mateus Bertolini Fernandes dos Santos                                                                                                                               | Zen, Bruno Massucato; Bacchi, Atais                                                                                                                           | 2016 |

|                                                                                                                                                                         |                                                                                           |      |
|-------------------------------------------------------------------------------------------------------------------------------------------------------------------------|-------------------------------------------------------------------------------------------|------|
| Preclinical Study                                                                                                                                                       |                                                                                           |      |
| Bone response to titanium alloy implants placed in diabetic rats.                                                                                                       | McCracken, Michael; Lemons, Jack E.; Rahemtulla, Firoz; Prince, Charles W.; Feldman, Dale | 2000 |
| RADIOGRAPHICAL AND IMMUNOHISTOCHEMICAL EVALUATION OF SILVER NANOPARTICLES IN TREATMENT OF INTRA-OSSEUS DEFECTS. AN ANIMAL STUDY                                         | Basha, Soha M.; Shawky, Heba A.; Hanafi, Rania                                            |      |
| The Effect of Different Implant Surfaces and Photodynamic Therapy on Periodontopathic Bacteria Using TaqMan PCR Assay following Peri-Implantitis Treatment in Dog Model | Madi M.; Alagl A.S.                                                                       | 2018 |

|                           |                                    |      |
|---------------------------|------------------------------------|------|
| Biomechanic study         |                                    |      |
| Biomechanics of the Wrist | Patterson, Rita; Viegas, Steven F. | 1995 |

|                                                                                                 |                                                                                                                                               |      |
|-------------------------------------------------------------------------------------------------|-----------------------------------------------------------------------------------------------------------------------------------------------|------|
| Bone graft material                                                                             |                                                                                                                                               |      |
| Densitometric analysis of prf vs. xenograft for sinus augmentation procedures—2 years follow-up | Sušić, Mato; Blašković, Marko; Brozović, Juraj; Gikić, Matija; Zore, Irina Filipović; Katanec, Davor; Granić, Marko; Pandurić, Dragana Gabrić | 2013 |

|                                                                                               |                                       |      |
|-----------------------------------------------------------------------------------------------|---------------------------------------|------|
| Dental material study                                                                         |                                       |      |
| 2.8 Assessment of Immuno-Allergological Properties of Ceramic and Metallic Compounds In Vitro | Thomas, P.; Barnstorf, S.; Summer, B. | 2001 |

|                                                                                                                                                                                                 |                                                                                                                                                                                                                                |      |
|-------------------------------------------------------------------------------------------------------------------------------------------------------------------------------------------------|--------------------------------------------------------------------------------------------------------------------------------------------------------------------------------------------------------------------------------|------|
| Imaging technology                                                                                                                                                                              |                                                                                                                                                                                                                                |      |
| Virtual Dental Patient: A 3D Oral Cavity Model and its Use in                                                                                                                                   | Nikolaidis, Nikos; Marras, Ioannis; Mikrogeorgis, Georgios; Lyrroudia, Kleoniki; Pitas, Ioannis                                                                                                                                | 2009 |
| Osseo-integration assessment by means of digital panoramic radiography and cone beam CT due to platelet rich plasma employment and graft placement in jaw bone defects                          | Γεωργακόπουλος, Ιωάννης                                                                                                                                                                                                        | 2015 |
| Dental material                                                                                                                                                                                 |                                                                                                                                                                                                                                |      |
| Effect of scaffold design on bone morphology in vitro                                                                                                                                           | Uebersax, Lorenz; Hagenmüller, Henri; Hofmann, Sandra; Gruenblatt, Emanuel; Müller, Ralph; Vunjaknovakovic, Gordana; Kaplan, David L.; Merkle, H. P.; Meinel, Lorenz                                                           | 2006 |
| Characterization of the surface properties of commercially available dental implants using scanning electron microscopy, focused ion beam, and high-resolution transmission electron microscopy | Jarmar, Tobias; Palmquist, Anders; Brånemark, Rickard; Hermansson, Leif; Engqvist, Håkan; Thomsen, Peter                                                                                                                       | 2008 |
| Not relevant to peri-implant disease                                                                                                                                                            |                                                                                                                                                                                                                                |      |
| Water flow on erbium: yttrium–aluminum–garnet laser irradiation: effects on dental tissues                                                                                                      | Colucci, Vivian; Do Amaral, Flávia Lucisano Botelho; Pécora, Jesus Djalma; Palma-Dibb, Regina Guenka; Corona, Silmara Aparecida Milori                                                                                         | 2009 |
| Diode laser vs. conventional technique for second stage surgery—a pilot study                                                                                                                   | Pandurić, Dragana Gabrić; Sušić, Mato; Brozović, Juraj; Žagar, Maja; Katanec, Davor; Jurić, Ivona Bago; Zore, Irina Filipović                                                                                                  | 2013 |
| Rehabilitation of patients with extreme mandibular alveolar ridge atrophy by means of slim and short mini dental implants and mandibular overdenture                                            | Kovačić, Ines; Kiršić, Sanja Peršić; Čelebić, Asja                                                                                                                                                                             | 2017 |
| Osseo-integration assessment by means of digital panoramic radiography and cone beam CT due to platelet rich plasma employment and graft placement in jaw bone defects                          | Γεωργακόπουλος, Ιωάννης                                                                                                                                                                                                        | 2015 |
| Vertical Bone Augmentation Using Deproteinized Bovine Bone Mineral, Absorbable Collagen Sponge, and Recombinant Human Bone Morphogenetic Protein-2: An In Vivo Study in Rabbits.                | Kim, Yeon Jung; Scaf de Molon, Rafael; Horiguti, Fausto Rioiti; Piragine Contador, Guilherme; Antonio Coelho, Marco; Ibiapina Mascarenhas, Vinicius; Paula de Souza Faloni, Ana; Cirelli, Joni Augusto; Sendyk, Wilson Roberto | 2018 |
| MRI and MRS investigation of patients with artificial hip joints at 3 T                                                                                                                         | Rzanny, R.; Sander, K.; Hiepe, P.; Gussew, A.; Roth, A.; Kinne, R. W.; Reichenbach, J. R.                                                                                                                                      | 2012 |
| Biomaterials                                                                                                                                                                                    | Stevens, Molly; Sardinha, Jose; Lim, Erh-Hsueh                                                                                                                                                                                 | 2011 |
| Arytenoid adduction as an adjunct to type I thyroplasty for unilateral vocal cord paralysis                                                                                                     | Kraus, Dennis H.; Orlikoff, Robert F.; Rizk, Samieh S.; Rosenberg, David B.                                                                                                                                                    | 1999 |
| Effects of new probiotic mouthwash in patients with diabetes mellitus and cardiovascular diseases                                                                                               | Bollero, P.; Di Renzo, L.; Franco, R.; Rampello, T.; Pujia, A.; Merra, G.; De Lorenzo, A.; Docimo, R.                                                                                                                          | 2017 |
| ECHTES TEAMWORK                                                                                                                                                                                 | Zwanzig, Kai; Hannker, Ztm Christian                                                                                                                                                                                           |      |
| Influence of Frontal and Sagittal Position of Total DiscArthroplasty on Clinical Outcomes at 3 Years Follow-Up                                                                                  | Aunoble, S.; Le Huec, J. C.                                                                                                                                                                                                    | 2007 |
| Current problems associated with toxicity evaluation of medical device materials and future research needs                                                                                      | Northup, Sharon J.                                                                                                                                                                                                             | 1989 |
| Osteoprotegerin (OPG) gene therapy in animal models of osteoarticular disease                                                                                                                   | Bolon, B.; Carter, C.; Daris, M.; Morony, S.; Campagnuolo, G.; Feige, U.; Sheng, J.                                                                                                                                            | 2001 |
| Tension band stabilization of fractures and luxations of the thoracolumbar vertebrae in dogs and cats: 38 cases (1993–2002)                                                                     | Voss, Katja; Montavon, Pierre M.                                                                                                                                                                                               | 2004 |
| Experimental evaluation of peritoneum and pericardium as dural substitutes                                                                                                                      | Gök, Abdülvahap; Zorludemir, Suzan; Polat, Sait; Tap, Özgül; Kaya, Mehmet                                                                                                                                                      | 1995 |
| The rheumatoid wrist                                                                                                                                                                            | Stanley, J. K.                                                                                                                                                                                                                 | 1991 |
| Fossils as Candidate Material for Orthopedic Applications                                                                                                                                       | Pesenti, Hector; Leoni, Matteo; Motta, Antonella; Scardi, Paolo                                                                                                                                                                | 2011 |
| Termical and voluminous bone effect comparison between Er-YAG laser and cortical drill-an experimental study                                                                                    | Pandurić, Dragana Gabrić; Anić, Ivica; Katanec, Davor; Žabkar, Janez; Ban, Ticijana; Kuna, Tihomir; Sušić, Mato                                                                                                                | 2009 |
| Biomaterials and Immune Response: Complications, Mechanisms and Immunomodulation                                                                                                                | Vrana, Nihal Engin                                                                                                                                                                                                             | 2018 |
| Long term results of limb salvage with the Fabroni custom made endoprosthesis                                                                                                                   | Fabroni, Roberto H.; Castagno, Aldo; Aguilera, Antonio L.; Steverlynck, Alejandro M.; Zeballos, Joaquin                                                                                                                        | 1999 |
| Methodology protocol for assess systemic and local effects of LLLT on osseointegration of dental implants in the rabbits jaws                                                                   | Mayer, Luciano; Oliveira, Marília Gerhardt de; Massotti, Fabrício P.; Gomes, Fernando V.; Guyoti, Viviane; González, Félix HD; Weber, João BB                                                                                  | 2013 |
| Genotype Analysis Identifies the Cause of the ‘Royal Disease’                                                                                                                                   | Organization, WHO: World Health; Kaminski, R.; Bella, R.; Yin, C.; Otte, J.; Ferrante, P.; Gendelman, H. E.; Li, H.; Booze, R.; Gordon, J.                                                                                     | 2017 |
| On various protocols for direct loading of implant-supported fixed prostheses                                                                                                                   | Östman, Pär-Olov                                                                                                                                                                                                               | 2007 |
| Treatment of Failed Hip Resurfacing                                                                                                                                                             | Amstutz, Harlan C.; Ball, Scott T.                                                                                                                                                                                             | 2008 |
| Handbook of biomaterial properties                                                                                                                                                              | Black, Jonathan; Hastings, Garth                                                                                                                                                                                               | 2013 |
| Applications of titania nanotubes in bone biology                                                                                                                                               | Nair, Manitha; Elizabeth, Elmy                                                                                                                                                                                                 | 2015 |

|                                                                                                                                                                                                                        |                                                                                                                                                    |      |
|------------------------------------------------------------------------------------------------------------------------------------------------------------------------------------------------------------------------|----------------------------------------------------------------------------------------------------------------------------------------------------|------|
| PET Imaging of Osteomyelitis. Feasibility of 18F-FDG, 68Ga-Chloride and 68Ga-DOTAVAP-P1 Tracers in Staphylococcal Bone Infections                                                                                      | Lankinen, Petteri                                                                                                                                  | 2013 |
| Hydrophile Implantatoberflächen                                                                                                                                                                                        | Bosch, Gabriel; Stübinger, Stefan; Rücker, Martin; Stadlinger, Bernd                                                                               |      |
| Effect of surface characteristics on cellular adherence and activity                                                                                                                                                   | Dorkhan, Marjan                                                                                                                                    | 2014 |
| Management peri                                                                                                                                                                                                        | KÖSTERS, C.; WÄHNERT, D.; SCHLIEMANN, B.; STANGE, R.; RASCHKE, MJ                                                                                  |      |
| Sinus augmentation using rhBMP-2-loaded synthetic bone substitute with simultaneous implant placement in rabbits                                                                                                       | 주명재                                                                                                                                                | 2017 |
| Polydopamine-assisted functionalization of heparin and vancomycin onto microarc-oxidized 3D printed porous Ti6Al4V for improved hemocompatibility, osteogenic and anti-infection potencies                             | Zhang, Teng; Zhou, Wenhao; Jia, Zhaojun; Wei, Qingguang; Fan, Daoyang; Yan, Jianglong; Yin, Chuan; Cheng, Yan; Cai, Hong; Liu, Xiaoguang           | 2018 |
| 20: The cost of anatomic versus semi-constrained (reverse) shoulder arthroplasty                                                                                                                                       | Collins, David N.                                                                                                                                  | 2007 |
| One-step fabrication of AgNPs embedded hybrid dual nanofibrous oral wound dressings                                                                                                                                    | Lee, Sang Jin; Heo, Dong Nyoung; Lee, Donghyun; Heo, Min; Rim, Hyunjoon; Zhang, Lijie Grace; Park, Su A.; Do, Sun Hee; Moon, Ji-Hoi; Kwon, Il Keun | 2016 |
| The infected total knee arthroplasty                                                                                                                                                                                   | Habermann, Edward T.                                                                                                                               | 1991 |
| Driving tissue morphogenetic cascades using tunable nanolayered surface coatings                                                                                                                                       | Shah, Nisarg Jaydeep                                                                                                                               | 2014 |
| Haemocompatibility of Medical Devices                                                                                                                                                                                  | van Oeveren, W.                                                                                                                                    | 2008 |
| Calcium phosphate bioceramics                                                                                                                                                                                          | Arcos, Daniel                                                                                                                                      | 2014 |
| Nutritional pharmacology and malignant disease: a therapeutic modality in patients with cancer                                                                                                                         | Heys, S. D.; Gough, D. B.; Khan, L.; Ermin, O.                                                                                                     | 1996 |
| Endometrial thickness is not independent of luteal phase day in a rural Polish population                                                                                                                              | Clancy, Kathryn BH; Ellison, Peter T.; Jasienska, Grazyna; Bribiescas, Richard G.                                                                  | 2009 |
| Biomaterials for musculoskeletal regeneration                                                                                                                                                                          | Basu, Bikramjit; Ghosh, Sourabh                                                                                                                    | 2017 |
| Biological effects of metal degradation in hip arthroplasties                                                                                                                                                          | Granchi, Donatella; Savarino, Lucia Maria; Ciapetti, Gabriela; Baldini, Nicola                                                                     | 2018 |
| Establishment and clinical application of a novel design protocol for custom-made titanium devices in alveolar bone augmentation for dental implants                                                                   | Otawa, N.; Sumida, T.; Nakano, H.; Yamada, T.; Mori, Y.                                                                                            | 2014 |
| Numerical investigation of bone remodelling around immediately loaded dental implants using sika deer (Cervus nippon) antlers as implant bed                                                                           | He, Yun; Hasan, Istabrak; Keilig, Ludger; Fischer, Dominik; Ziegler, Luisa; Abboud, Marcus; Wahl, Gerhard; Bouraue, Christoph                      | 2018 |
| Dental Implant Macro-Design Features Can Impact the Dynamics of Osseointegration                                                                                                                                       | Judith De Rycker, M. D.; Bart Van Meerbeek, D. D. S.; Ignace Naert, D. D. S.                                                                       |      |
| Comparative 3D FEM analysis of three different dental implant shapes                                                                                                                                                   | Stanislaw, K. U. T.                                                                                                                                |      |
| Pre-implant Surgical Interventions with Focus on the Maxilla                                                                                                                                                           | Protocol, Early Surgical                                                                                                                           | 2008 |
| Implants in the Posterior Maxilla: Open Sinus Lift Versus Conventional Implant Placement. A Systematic Review.                                                                                                         | Romero-Millán, Javier; Aizcorbe-Vicente, Javier; Peñarrocha-Diogo, Maria; Galindo-Moreno, Pablo; Canullo, Luigi; Peñarrocha-Oltra, David           | 2019 |
| Periodontal-Restorative Interactions                                                                                                                                                                                   | Dumitrescu, Alexandrina L.; Okada, Mitsugi; Inagaki, Koji                                                                                          | 2010 |
| Overtreatment: an effective alternative in implant therapy on a single tooth with root resorption in patient with chronic periodontitis                                                                                | CAMPOS, André Luiz Oliveira; SHIBLI, Jamil Awad; IUROVSCI, Ronaldo; WATINAGA, Sidney Eiji                                                          | 2015 |
| Soft Tissue Attachment to Titanium Implants Coated with Growth Factors                                                                                                                                                 | Marino, Victor                                                                                                                                     |      |
| Patterns of stress and strain in complete-arch prostheses supported by four or six implants: A literature review of finite element analyses                                                                            | Valian, Nasrin Keshavarz; Ardakani, Mohammad Reza Talebi; Ahari, Alireza Aziz; Taghi, Mohammad                                                     | 2018 |
| The Implant Design and Biological Response                                                                                                                                                                             | DESIGN, INFLUENCES OF IMPLANT                                                                                                                      | 2008 |
| Short implants to retain/support overdentures in extremely resorbed mandibles with different transverse widths: a finite element analysis                                                                              | Erbasar, Güzin Neda Hasanoglu; Soganci, Gokce; Aykent, Filiz; Ertem, Sinan Yasin                                                                   | 2019 |
| Towards the Optimal Crown-to-Implant Ratio in Dental Implants                                                                                                                                                          | Sego, T. J.; Hsu, Yung-Ting; Chu, Tien-Min Gabriel; Tovar, Andres                                                                                  | 2017 |
| Nordic contribution to dental and orofacial sciences                                                                                                                                                                   | Könönen, Eija; Lyng Pedersen, Anne Marie                                                                                                           | 2018 |
| Clinical and Radiological Evaluation of Screw-retained and Cement-retained Single-implant Restorations-A Comparative Study                                                                                             | Francis, Litty; Pillai, S. Babukuttan; Lylajam, S.                                                                                                 |      |
| Four Stable and Functioning Dental Implants Retrieved for Fracture After 14 and 17 Years from the Same Patient: A Histologic and Histomorphometric Report.                                                             | Botticelli, Daniele; Perrotti, Vittoria; Piattelli, Adriano; Iezzi, Giovanna                                                                       | 2019 |
| Clinical and radiographic assessment of implant-supported rehabilitation of partial and complete edentulism: a 2 to 8 years clinical follow-up                                                                         | Manicone, P. F.; Passarelli, P. C.; Bigagnoli, S.; Pastorino, R.; Manni, A.; Pasquantonio, G.; D'Addona, A.                                        | 2018 |
| Case Report Mandibular reconstruction with single barrel vascular free fibula flap and implants-borne fixed prosthesis: usage of a modified healing abutment                                                           | Si, Jiawen; Li, Hongliang; Wang, Minjiao; Ren, Rong; Fei, Jiongmei; Shen, Steve GF; Shi, Jun                                                       | 2017 |
| Research Article Comparative Evaluation of Osseointegrated Dental Implants Based on Platform-Switching Concept: Influence of Diameter, Length, Thread Shape, and In-Bone Positioning Depth on Stress-Based Performance | Vairo, Giuseppe; Sannino, Gianpaolo                                                                                                                |      |

|                                                                                                                                                                                           |                                                                                                                                                |      |
|-------------------------------------------------------------------------------------------------------------------------------------------------------------------------------------------|------------------------------------------------------------------------------------------------------------------------------------------------|------|
| rhBMP-2 for Alveolar Bone Reconstruction in Implant Dentistry                                                                                                                             | Hanisch, Pr Ulf Wikesjö1-Dr Oliver; Danesh-Meyer, Pr Michael J.                                                                                | 2000 |
| Implant Abutment Selection Criteria                                                                                                                                                       | Mumcu, E.; Erdinc, G.                                                                                                                          | 2018 |
| Biological behavior of titanium, zirconia or PEEK dental implant-abutments                                                                                                                | Sordi, M. B.; Sarwer-Foner, S. N. D.; Schünemann, F. H.; Apaza-Bedoya, K.; Juanito, G. M. P.; Henriques, B.; Magini, R. S.; Benfatti, C. A. M. | 2019 |
| High-Performance Polymers and Their Potential Application as Medical and Oral Implant Materials: A Review                                                                                 | Ti, Titanium                                                                                                                                   | 2015 |
| Novel Techniques in Dentoalveolar and Implant Surgery                                                                                                                                     | Motamedi, Mohammad Hosein Kalantar; Hassani, Ali                                                                                               | 2016 |
| Risk Factors and Early Survival Rate of Biomet 3i Dental Implants. A Retrospective Study                                                                                                  | Aghdam, Mina Kahyaie                                                                                                                           |      |
| Strain distribution of immediately loaded implants with fixed prosthesis using the “All-on-Four” protocol in the edentulous mandible: nonlinear three-dimensional finite element analysis | Horita, S.; Sugiura, T.; Yamamoto, K.; Kawakami, M.; Murakami, K.; Kirita, T.                                                                  | 2014 |
| Implant Surgery Interventions                                                                                                                                                             | IMPLANT, OPTIMAL DENTAL                                                                                                                        | 2008 |
| The experimental study of HA-Coated titanium dental implant in dogs                                                                                                                       | Li, Liu                                                                                                                                        | 1996 |
| Clinical Significance of Immediate implant placement                                                                                                                                      | Sakamoto, Y.                                                                                                                                   | 2014 |
| Peri-implant alveolar bone resorption in an innovative peri-implantitis murine model: Effect of implant surface and onset of infection                                                    | Varon-Shahar, Einat; Shusterman, Ariel; Piattelli, Adriano; Iezzi, Giovanna; Weiss, Ervin I.; Houry-Haddad, Yael                               | 2019 |
| Porous polymethylmethacrylate cement: development and evaluation of a potential implant material                                                                                          | de Wijn, Joost Robert                                                                                                                          | 1982 |
| An Unusual Bone Loss Around Implants.                                                                                                                                                     | Reza Rokn, Amir; Sajedinejad, Neda; Yousefyfakhr, Hosnieh; Badri, Samare                                                                       | 2013 |
| The influence of implant-abutment connection to peri-implant bone loss: A systematic review and meta-analysis                                                                             | Paolo Ghensi, D. D. S.; Dent, Oral Surgery MCLin                                                                                               |      |
| Effect of Platform switching on peri-implant tissues: A review                                                                                                                            | Baig, Nazish; Kadam, Pranit; Yeshwante, Babita; Mhaske, Maya; Jadhav, Vivek                                                                    | 2015 |
| Current Protocols for the Treatment of Peri-implantitis                                                                                                                                   | Garaicoa-Pazmino, Carlos; Sinjab, Khaled; Wang, Hom-Lay                                                                                        | 2019 |
| Influence of bone density on peri-implant bone strain distribution in an immediately loaded implant                                                                                       | Sugiura, T.; Yamamoto, K.; Horita, S.; Kawakami, M.; Murakami, K.; Kirita, T.                                                                  | 2014 |
| Circularly polarized light standards for investigations of collagen fiber orientation in bone                                                                                             | Bromage, Timothy G.; Goldman, Haviva M.; McFarlin, Shannon C.; Warshaw, Johanna; Boyde, Alan; Riggs, Christopher M.                            | 2003 |
| Management of loading forces on mandibular distal-extension prostheses. Part I: Evaluation of concepts for design                                                                         | Monteith, Brian D.                                                                                                                             | 1984 |
| Virtual implant planning in the edentulous maxilla: criteria for decision making of prosthesis design                                                                                     | Avrampou, Marianna; Mericske-Stern, Regina; Blatz, Markus B.; Katsoulis, Joannis                                                               | 2013 |
| In vivo evaluation of biodegradability and biocompatibility of Fe30Mn alloy                                                                                                               | Traverson, Marine; Heiden, Michael; Stanciu, Lia A.; Nauman, Eric A.; Jones-Hall, Yava; Breur, Gert J.                                         | 2018 |
| Current Status of Dental Implants: A Periodontal Perspective                                                                                                                              | PERIODONTICS, OF                                                                                                                               | 2000 |
| Biomechanical in vitro evaluation of two full-arch rehabilitations supported by four or five implants.                                                                                    | Francetti, Luca; Cavalli, Nicolo; Villa, Tomaso; La Barbera, Luigi; Taschieri, Silvio; Corbella, Stefano; Del Fabbro, Massimo                  | 2015 |
| Textbook of prosthodontics                                                                                                                                                                | Nallaswamy, Deepak                                                                                                                             | 2017 |
| Guided Bone Regeneration for Dental Implants                                                                                                                                              | Weshler, Mishel; Antoniac, Iulian Vasile                                                                                                       | 2014 |
| Simplified Protocol for Relining Provisional Prosthesis on Natural Abutments: A Technical Note.                                                                                           | Galli, Fabio; Deflorian, Matteo; Testori, Tiziano                                                                                              | 2018 |
| On the influence of biochemical coating on implant bone incorporation                                                                                                                     | Bougas, Kostas                                                                                                                                 | 2012 |
| Vertical bone augmentation with simultaneous dental implantation using crestal biomaterial rings: a rabbit animal study                                                                   | Draenert, Florian G.; Kämmerer, Peer W.; Palarie, Victor; Wagner, Wilfried                                                                     | 2012 |
| Carga inmediata en implantes dentales                                                                                                                                                     | Concejo Cútoli, C.; Montesdeoca García, N.                                                                                                     | 2005 |
| Síndrome de colapso de mordida posterior                                                                                                                                                  | Baldión, Paula Alejandra; Castro, Diego Enrique Betancourt                                                                                     | 2012 |
| Rehabilitación del maxilar superior con atrofia severa horizontal utilizando implantes dentales palatinizados.                                                                            | Candel Martí, Eugenia                                                                                                                          | 2016 |
| Evaluación de la micro-deformación de la zona maxilar anterior con regeneración. Análisis de elementos finitos                                                                            | Henao, Johan Ivan Aguilar; Ossa, Junes Abdul Villarraga; Correa, Federico Latorre                                                              |      |
| ARTHRITIS AND OTHER JOINT DISEASES: TRANSLATIONAL AND CLINICAL                                                                                                                            | Nanoparticle, Iron Oxide; During, MRI Approach                                                                                                 | 2015 |
| Arytenoid adduction as an adjunct to type I thyroplasty for unilateral vocal cord paralysis                                                                                               | Kraus, Dennis H.; Orlikoff, Robert F.; Rizk, Samieh S.; Rosenberg, David B.                                                                    | 1999 |
|                                                                                                                                                                                           |                                                                                                                                                |      |
| Synthesis, characterization, and bioactivity of SrTiO 3-incorporated titanium coating                                                                                                     | Sahoo, Souvik; Sinha, Arijit; Balla, Vamsi Krishna; Das, Mitun                                                                                 | 2018 |
| 牙种植体周围微生物研究.                                                                                                                                                                              | 程磊; 干海洋; 吴尧; 包崇云; 杨帮成; 满毅; 孙瑶; 岩晓丽; 周学东                                                                                                        | 2019 |
| Joshua Jacobs                                                                                                                                                                             | Levine, Jonathan Black Brett                                                                                                                   | 2007 |

|                                                                                                                                                                                                      |                                                                                                                                                          |      |
|------------------------------------------------------------------------------------------------------------------------------------------------------------------------------------------------------|----------------------------------------------------------------------------------------------------------------------------------------------------------|------|
| Análise da Resposta Tecidual Perimplantar em Regiões com Baixa Densidade Óssea Analysis of Peri-implant Tissue Response in Areas with a Low Bone Density                                             | Mayer, Luciano                                                                                                                                           |      |
| Bone Tissue Responses to Zirconia Implants Modified by Biomimetic Coating Incorporated with BMP-2.                                                                                                   | Teng, Fei; Zheng, Yuanna; Wu, Gang; Beekmans, Bart; Wismeijer, Daniel; Lin, Xingnan; Liu, Yuelian                                                        | 2019 |
| Current Concepts for the Basis of Dental Biological Implants                                                                                                                                         | Equilibrium, Foreign Body                                                                                                                                | 2015 |
| Dermal zygomatic peri-implant reaction—gene expression?                                                                                                                                              | Sampaio-Fernandes, M. A.; Tovim, L.; Rau, L.; Silva, C.; Sampaio-Fernandes, J. C.; Vaz, P.                                                               | 2017 |
| Treatment of Implant Surfaces: Insights, Outcomes and Limitations                                                                                                                                    | Corrêa, Cássia Bellotto; Ribeiro, Ana Lúcia Roselino; Moretti, Livia Alves Corrêa; Consolaro, Alberto; Junior, Elcio Marcantonio                         | 2015 |
| Peri-implant Mucosal Tissues and Inflammation: Clinical Implications.                                                                                                                                | Fiorellini, Joseph P.; Luan, Kevin WanXin; Chang, Yu-Cheng; Kim, David Minjoon; Sarmiento, Hector L.                                                     | 2019 |
| Hard tissue-biomaterial interactions                                                                                                                                                                 | Korkusuz, Petek; Korkusuz, Feza                                                                                                                          | 2004 |
| Applications of medical implant materials                                                                                                                                                            | Drummond, Colin K.; Khan, Fahd R.                                                                                                                        | 2012 |
| Cellular proliferation and macrophage populations associated with implanted expanded polytetrafluoroethylene and polyethyleneterephthalate                                                           | Hagerty, R. Daniel; Salzmann, Dennis L.; Kleinert, Leigh B.; Williams, Stuart K.                                                                         | 2000 |
| Synergetic inactivation of Staphylococcus epidermidis and Streptococcus mutans in a TiO <sub>2</sub> /H <sub>2</sub> O <sub>2</sub> /UV system                                                       | Unosson, Erik; Tsekoura, Eleni K.; Engqvist, Håkan; Welch, Ken                                                                                           | 2013 |
| Surgical treatment of periodontal intrabony defects with calcium sulfate implant and barrier versus collagen barrier or open flap debridement alone: a 12-month randomized controlled clinical trial | Paolantonio, Michele; Perinetti, Giuseppe; Dolci, Marco; Perfetti, Giorgio; Tetè, Stefano; Sammartino, Gilberto; Femminella, Beatrice; Graziani, Filippo | 2008 |
| Systematic review of pre-clinical models assessing implant integration in locally compromised sites and/or systemically compromised animals                                                          | Thoma, Daniel S.; Martin, Ignacio Sanz; Mühlemann, Sven; Jung, Ronald E.                                                                                 | 2012 |
| Top-Cited Articles in Implant Dentistry.                                                                                                                                                             | Fardi, Anastasia; Kodonas, Konstantinos; Lillis, Theodoros; Veis, Alexander                                                                              | 2017 |
| Prosthetic gingival reconstruction in the fixed partial restoration. Part 2: diagnosis and treatment planning.                                                                                       | Salama, Maurice; Coachman, Christian; Garber, David; Calamita, Marcelo; Salama, Henry; Cabral, Guilherme                                                 | 2009 |
| Bone formation on biomimetic calcium phosphate-coated and zoledronate-immobilized titanium implants in osteoporotic rat tibiae.                                                                      | Pyo, Sung Woon; Kim, Young Mi; Kim, Chul Seung; Lee, In Seop; Park, Je Uk                                                                                | 2014 |
| Clinical applications of polytetrafluoroethylene (PTFE) tape in restorative dentistry                                                                                                                | Sattar, M. M.; Patel, M.; Alani, A.                                                                                                                      | 2017 |
| Suture materials affect peri-implant bone healing and implant osseointegration                                                                                                                       | Villa, Oscar; Lyngstadaas, Staale P.; Monjo, Marta; Satué, Maria; Rønold, Hans J.; Petzold, Christiane; Wohlfahrt, Johan C.                              | 2015 |
| Biofunctional coatings for dental implants                                                                                                                                                           | Chen, Xi; Li, Yuping; Aparicio, Conrado                                                                                                                  | 2013 |
| Maxillary sinus grafting with a nano-structured biomaterial: preliminary clinical and histological results                                                                                           | Stübinger, S.; Ghanaati, S.; Orth, C.; Hilbig, U.; Saldamli, B.; Biesterfeld, S.; Kirkpatrick, C. J.; Sader, R. A.                                       | 2009 |
| Fundamentals of implant dentistry                                                                                                                                                                    | Byrne, Gerard                                                                                                                                            | 2014 |
| Peri-implant bone remodeling around an extraction socket: predictions of bone maintenance by finite element method.                                                                                  | Chou, Hsuan-Yu; Romanos, Georgios; Müftü, Ali; Müftü, Sinan                                                                                              | 2012 |
| Augmentation of localized defects of the anterior maxillary ridge with autogenous bone before insertion of implants                                                                                  | Raghoebar, Gerry M.; Batenburg, Rutger HK; Vissink, Arjan; Reintsema, Harry                                                                              | 1996 |
| A 36-month randomized controlled split-mouth trial comparing immediately loaded titanium oxide-anodized and machined implants supporting fixed partial dentures in the posterior mandible.           | Fung, Karen; Marzola, Riccardo; Scotti, Roberto; Tadinada, Aditya; Schincaglia, Gian Pietro                                                              | 2011 |
| Effects of magnesium-substituted nanohydroxyapatite coating on implant osseointegration                                                                                                              | Zhao, Shi-fang; Jiang, Qiao-hong; Peel, Sean; Wang, Xiao-xiang; He, Fu-ming                                                                              | 2013 |
| Does immediate loading affect clinical and patient-centered outcomes of mandibular 2-unsplinted-implant overdenture? A 2-year within-case analysis                                                   | Emami, Elham; Cerutti-Kopplin, Daiane; Menassa, Mélanie; Audy, Nicholas; Kodama, Naoki; Durand, Robert; Rompré, Pierre; de Grandmont, Pierre             | 2016 |
| Immediate loading of four or six implants in completely edentulous patients                                                                                                                          | Antoun, Hadi; Belmon, Patrick; Cherfane, Pierre; Sitbon, Jean Max                                                                                        | 2012 |
| Collagenous matrix coatings on titanium implants modified with decorin and chondroitin sulfate: characterization and influence on osteoblastic cells                                                 | Bierbaum, Susanne; Douglas, Timothy; Hanke, Thomas; Scharnweber, Dieter; Tippelt, Sonja; Monsees, Thomas K.; Funk, Richard HW; Worch, Hartmut            | 2006 |
| A Novel Osseous Densification Approach in Implant Osteotomy Preparation to Increase Biomechanical Primary Stability, Bone Mineral Density, and Bone-to-Implant Contact.                              | Huwais, Salah; Meyer, Eric G.                                                                                                                            | 2017 |
| Biomechanical investigation of thread designs and interface conditions of zirconia and titanium dental implants with bone: three-dimensional numeric analysis.                                       | Fuh, Lih-Jyh; Hsu, Jui-Ting; Huang, Heng-Li; Chen, Michael YC; Shen, Yen-Wen                                                                             | 2013 |
| Osseointegration surgery: Host determinants and outcome criteria                                                                                                                                     | Sennerby, Lars; Rasmusson, Lars                                                                                                                          | 2002 |
| Effects of occlusal inclination and loading on mandibular bone remodeling: a finite element study.                                                                                                   | Rungsiyakull, Chaib; Rungsiyakull, Pimduen; Li, Qing; Li, Wei; Swain, Michael                                                                            | 2011 |
| Influence of static overload on the bony interface around implants in dogs.                                                                                                                          | Miyamoto, Yasunari; Koretake, Katsunori; Hirata, Makoto; Kubo, Takayasu; Akagawa, Yasumasa                                                               | 2008 |
| Surface characterization analysis of failed dental implants using scanning electron microscopy                                                                                                       | Daood, Umer; Bandey, Ninette; Qasim, Saad Bin; Omar, Hanan; Khan, Saad A.                                                                                | 2011 |
| Influence of bone and dental implant parameters on stress distribution in the mandible: a finite element study                                                                                       | Guan, Hong; Van Staden, Rudi; Loo, Yew-Chaye; Johnson, Newell; Ivanovski, Saso; Meredith, Neil                                                           | 2009 |
| Finite element stress analysis of dental prostheses supported by straight and angled implants.                                                                                                       | Cruz, Mauro; Wassall, Thomaz; Toledo, Elson Magalhaes; da Silva Barra, Luis Paulo; Cruz, Silvia                                                          | 2009 |

|                                                                                                                                                                                                                                    |                                                                                                                                                                             |      |
|------------------------------------------------------------------------------------------------------------------------------------------------------------------------------------------------------------------------------------|-----------------------------------------------------------------------------------------------------------------------------------------------------------------------------|------|
| Bone strains around immediately loaded implants supporting mandibular overdentures in human cadavers.                                                                                                                              | Akca, Kivanc; Akkocaoğlu, Murat; Cömert, Ayhan; Tekdemir, Ibrahim; Cehreli, Murat Cavit                                                                                     | 2007 |
| Periodontal repair in dogs: a bioabsorbable calcium carbonate coral implant enhances space provision for alveolar bone regeneration in conjunction with guided tissue regeneration                                                 | Wikesjö, Ulf ME; Lim, Won Hee; Razi, Saghi S.; Sigurdsson, Thorarinn J.; Lee, Michael B.; Tatakis, Dimitris N.; Hardwick, W. Ross                                           | 2003 |
| Marginal bone loss around tilted implants in comparison to straight implants: a meta-analysis.                                                                                                                                     | Monje, Alberto; Chan, Hsun-Liang; Suarez, Fernando; Galindo-Moreno, Pablo; Wang, Hom-Lay                                                                                    | 2012 |
| Biomaterial osseointegration enhancement with biophysical stimulation                                                                                                                                                              | Dimitriou, R.; Babis, G. C.                                                                                                                                                 | 2007 |
| Implant survival rate and marginal bone loss of 6-mm short implants: a 2-year clinical report.                                                                                                                                     | Bratu, Emanuel; Chan, Hsun-Liang; Mihali, Sorin; Karancsi, Olimpiu; Bratu, Dana Cristina; Fu, Jia-Hui; Wang, Hom-Lay                                                        | 2014 |
| Surgical-prosthetic reconstruction of advanced maxillary bone compromise with autogenous onlay block bone grafts and osseointegrated endosseous implants: a 12-year study of 32 consecutive patients.                              | Keller, Eugene E.; Tolman, Dan E.; Eckert, Steven                                                                                                                           | 1999 |
| Implant materials, design, and surface topographies: their influence on osseointegration of dental implants                                                                                                                        | Triplett, R. Gilbert; Froberg, Uwe; Sykaras, Nikitas; Woody, Ronald D.                                                                                                      | 2003 |
| Effects of implant thread geometry on percentage of osseointegration and resistance to reverse torque in the tibia of rabbits                                                                                                      | Steigenga, Jennifer; Al-Shammari, Khalaf; Misch, Carl; Nociti, Francisco H.; Wang, Hom-Lay                                                                                  | 2004 |
| Bone morphogenetic protein 2 incorporated into biomimetic coatings retains its biological activity                                                                                                                                 | Liu, Yuelian; Hunziker, Ernst B.; Layrolle, Pierre; De Bruijn, Joost D.; De Groot, Klaas                                                                                    | 2004 |
| Ridge preservation after tooth extraction                                                                                                                                                                                          | Wang, Ren E.; Lang, Niklaus P.                                                                                                                                              | 2012 |
| Preliminary 3-dimensional surface texture measurement and early loading results with a microtextured implant surface.                                                                                                              | Mazor, Ziv; Cohen, Donald K.                                                                                                                                                | 2003 |
| In vitro osteoclast resorption of bone substitute biomaterials used for implant site augmentation: a pilot study.                                                                                                                  | Taylor, James C.; Cuff, Sheldon E.; Leger, James PL; Morra, Amani; Anderson, Gail I.                                                                                        | 2002 |
| Tooth-implant connection: a bibliographic review                                                                                                                                                                                   | Hita-Carrillo, Celso; Hernández-Aliaga, Manuel; Calvo-Guirado, Jose-Luis                                                                                                    | 2010 |
| Influence of Laser-Lok surface on immediate functional loading of implants in single-tooth replacement: a 2-year prospective clinical study                                                                                        | Farronato, Davide; Mangano, Francesco; Briguglio, Francesco; Iorio-Siciliano, Vincenzo; Riccitello, Francesco; Guarnieri, Renzo                                             | 2014 |
| Osteointegration of titanium and hydroxyapatite rough surfaces in healthy and compromised cortical and trabecular bone: in vivo comparative study on young, aged, and estrogen-deficient sheep                                     | Borsari, Veronica; Fini, Milena; Giavaresi, Gianluca; Rimondini, Lia; Consolo, Ugo; Chiusoli, Loris; Salito, Armando; Volpert, Andreas; Chiesa, Roberto; Giardino, Roberto  | 2007 |
| The combined use of rhBMP-2/ACS, autogenous bone graft, a bovine bone mineral biomaterial, platelet-rich plasma, and guided bone regeneration at nonsubmerged implant placement for supracrestal bone augmentation. A case report. | Sclar, Anthony G.; Best, Steven P.                                                                                                                                          | 2013 |
| Bone-to-implant apposition with machined and MTX microtextured implant surfaces in human sinus grafts.                                                                                                                             | Trisi, Paolo; Marcato, Carlo; Todisco, Marzio                                                                                                                               | 2003 |
| Adherence of Streptococcus mutans to implant materials                                                                                                                                                                             | Fujioka-Hirai, Yumi; Akagawa, Yasumasa; Minagi, Shogo; Tsuru, Hiromichi; Miyake, Yoichiro; Suganaka, Hidekazu                                                               | 1987 |
| The relationship of Periotest values, biomaterial, and torque to failure in adult baboons.                                                                                                                                         | Carr, Alan B.; Papazoglou, Efstratios; Larsen, Peter E.                                                                                                                     | 1995 |
| Coating with artificial matrices from collagen and sulfated hyaluronan influences the osseointegration of dental implants                                                                                                          | Schulz, Matthias C.; Korn, Paula; Stadlinger, Bernd; Range, Ursula; Möller, Stephanie; Becher, Jana; Schnabelrauch, Matthias; Mai, Ronald; Scharnweber, Dieter; Eckelt, Uwe | 2014 |
| Significance of nano- and microtopography for cell-surface interactions in orthopaedic implants                                                                                                                                    | Jäger, M.; Zilkens, C.; Zanger, K.; Krauspe, R.                                                                                                                             | 2007 |
| Differences in osseointegration rate due to implant surface geometry can be explained by local tissue strains                                                                                                                      | Simmons, Craig A.; Meguid, Shaker A.; Pilliar, Robert M.                                                                                                                    | 2001 |
| Dental implant biomaterials                                                                                                                                                                                                        | Lemons, Jack E.                                                                                                                                                             | 1990 |
| Dental zirconia implants up to three years in function: a retrospective clinical study and evaluation of prosthetic restorations and failures.                                                                                     | Gahlert, Michael; Burtscher, Doris; Pfundstein, George; Grunert, Ingrid; Kniha, Heinz; Roehling, Stefan                                                                     | 2013 |
| Effect of tilted and short distal implants on axial forces and bending moments in implants supporting fixed dental prostheses: an in vitro study.                                                                                  | Ogawa, Toru; Dhaliwal, Sandra; Naert, Ignace; Mine, Atsushi; Kronstrom, Mats; Sasaki, Keiichi; Duyck, Joke                                                                  | 2010 |
| Characterization of bone around titanium implants and bioactive glass particles: an experimental study in rats.                                                                                                                    | Gorustovich, Alejandro; Rosenbusch, Mariana; Guglielmotti, Maria B.                                                                                                         | 2002 |
| Peri-implant pathology—relation to implant failure and tumor formation                                                                                                                                                             | Athanasou, N. A.                                                                                                                                                            | 2007 |
| Functional assessment of dental implant osseointegration.                                                                                                                                                                          | Chang, Po-Chun; Giannobile, William V.                                                                                                                                      | 2012 |
| Platform switching: biomechanical evaluation using three-dimensional finite element analysis.                                                                                                                                      | Tabata, Lucas Fernando; Rocha, Eduardo Passos; Barao, Valentim Adelino Ricardo; Assunção, Wirley Gonçalves                                                                  | 2011 |
| Color atlas of oral diseases                                                                                                                                                                                                       | Laskaris, George                                                                                                                                                            | 2003 |
| Ultraviolet photofunctionalization of titanium implants.                                                                                                                                                                           | Ogawa, Takahiro                                                                                                                                                             | 2014 |
| Alveolar bone regeneration for immediate implant placement using an injectable bone substitute: an experimental study in dogs                                                                                                      | Boix, Damien; Gauthier, Olivier; Guicheux, Jérôme; Pilet, Paul; Weiss, Pierre; Grimandi, Gaël; Daculsi, Guy                                                                 | 2004 |
| Comparison of implant body designs and threaded designs of dental implants: a 3-dimensional finite element analysis.                                                                                                               | Huang, Heng-Li; Chang, Chin-Han; Hsu, Jui-Ting; Faligatter, Alison M.; Ko, Ching-Chang                                                                                      | 2007 |
| Interface shear strength of titanium implants with a sandblasted and acid-etched surface: A biomechanical study in the maxilla of miniature pigs                                                                                   | Buser, Daniel; Nydegger, Thomas; Oxland, Thomas; Cochran, David L.; Schenk, Robert K.; Hirt, Hans Peter; Snétivy, Daniel; Nolte, Lutz-Peter                                 | 1999 |

|                                                                                                                                                                                                            |                                                                                                                                                                            |      |
|------------------------------------------------------------------------------------------------------------------------------------------------------------------------------------------------------------|----------------------------------------------------------------------------------------------------------------------------------------------------------------------------|------|
| Influence of extracellular matrix coatings on implant stability and osseointegration: an animal study                                                                                                      | Stadlinger, Bernd; Pilling, Eckart; Huhle, Matthias; Mai, Ronald; Bierbaum, Susanne; Bernhardt, Ricardo; Scharnweber, Dieter; Kuhlisch, Eberhard; Hempel, Ute; Eckelt, Uwe | 2007 |
| Trial with Platelet-Rich Fibrin and Bio-Oss used as grafting materials in the treatment of the severe maxillar bone atrophy: clinical and radiological evaluations                                         | Inchingolo, F.; Tatullo, M.; Marrelli, M.; Inchingolo, A. M.; Scacco, S.; Inchingolo, A. D.; Dipalma, G.; Vermesan, D.; Abbinante, A.; Cagiano, R.                         | 2010 |
| Periodontal and peri-implant bone regeneration: clinical and histologic observations.                                                                                                                      | Artzi, Zvi; Zohar, Ron; Tal, Haim                                                                                                                                          | 1997 |
| In vitro bone strain analysis of implant following occlusal overload                                                                                                                                       | Kan, Janice PM; Judge, Roy B.; Palamara, Joseph EA                                                                                                                         | 2014 |
| Effects of Repeated Screw Tightening on Implant Abutment Interfaces in Terms of Bacterial and Yeast Leakage in Vitro: One-Time Abutment Versus the Multiscrewing Technique.                                | Calcaterra, Roberta; Di Girolamo, Michele; Mirisola, Concetta; Baggi, Luigi                                                                                                | 2016 |
| In vitro attachment of human gingival fibroblasts to endosseous implant materials                                                                                                                          | Guy, S. C.; McQuade, M. J.; Scheidt, M. J.; McPherson, JC d; Rossmann, J. A.; Van Dyke, T. E.                                                                              | 1993 |
| Direct implant loading in the edentulous maxilla using a bone density-adapted surgical protocol and primary implant stability criteria for inclusion                                                       | Östman, Pär-Olov; Hellman, Mats; Sennerby, Lars                                                                                                                            | 2005 |
| Surface modifications of dental implants                                                                                                                                                                   | Stanford, C. M.                                                                                                                                                            | 2008 |
| Effects of implant surface coatings and composition on bone integration: a systematic review                                                                                                               | Junker, Rüdiger; Dimakis, Athanasios; Thoneick, Maurice; Jansen, John A.                                                                                                   | 2009 |
| Early and immediately restored and loaded dental implants for single-tooth and partial-arch applications.                                                                                                  | Ganeles, Jeffrey; Wismeijer, Daniel                                                                                                                                        | 2004 |
| Titanium endosseous implant-soft tissue interface: a literature review                                                                                                                                     | Donley, Timothy G.; Gillette, William B.                                                                                                                                   | 1991 |
| Implant positioning errors in freehand and computer-aided placement methods: a single-blind clinical comparative study.                                                                                    | Arisan, Volkan; Karabuda, Cüneyt Z.; Mumcu, Emre; Özdemir, Tayfun                                                                                                          | 2013 |
| Effect of recombinant human bone morphogenetic protein-2 in an absorbable collagen sponge with space-providing biomaterials on the augmentation of chronic alveolar ridge defects                          | Barboza, Eliane Porto; Caúla, André Luis; de Oliveira Caúla, Fernanda; de Souza, Rogério Oliveira; Neto, Luiz Geolás; Sorensen, Rachel G.; Li, X. Jian; Wikesjö, Ulf ME    | 2004 |
| Five-year prospective study of immediate/early loading of fixed prostheses in completely edentulous jaws with a bone quality-based implant system                                                          | Misch, Carl E.; Degidi, Marco                                                                                                                                              | 2003 |
| Immediate loading of Trabecular Metal-enhanced titanium dental implants: interim results from an international proof-of-principle study                                                                    | Schlee, Marcus; van der Schoor, W. Peter; van der Schoor, Alexandra RM                                                                                                     | 2015 |
| Alveolar distraction osteogenesis for the correction of vertically deficient edentulous ridges: a multicenter prospective study on humans.                                                                 | Chiapasco, Matteo; Consolo, Ugo; Bianchi, Alberto; Ronchi, Paolo                                                                                                           | 2004 |
| Stimulation of directed bone growth at oxidized titanium implants by macroscopic grooves: an in vivo study                                                                                                 | Hall, Jan; Miranda-Burgos, Patricia; Sennerby, Lars                                                                                                                        | 2005 |
| Two-year prospective follow-up of implant/tooth-supported versus freestanding implant-supported fixed partial dentures.                                                                                    | Akça, Kıvanç; Çehrel, Murat C.                                                                                                                                             | 2008 |
| Effects of bone morphogenetic protein-2 and hyaluronic acid on the osseointegration of hydroxyapatite-coated implants: An experimental study in sheep                                                      | Aebli, Nikolaus; Stich, Hermann; Schawalder, Peter; Theis, Jean-Claude; Krebs, Jörg                                                                                        | 2005 |
| Biomechanical optimization of implant diameter and length for immediate loading: a nonlinear finite element analysis.                                                                                      | Kong, Liang; Gu, Zexu; Li, Tao; Wu, Junjie; Hu, Kaijin; Liu, Yanpu; Zhou, Hongzhi; Liu, Baolin                                                                             | 2009 |
| Histologic Evaluation of Sinus Grafting Materials After Peri-implantitis-Induced Failure: A Case Series.                                                                                                   | Scarano, Antonio; Cholakias, Anastasia Kelekis; Piattelli, Adriano                                                                                                         | 2017 |
| Biomechanics and load resistance of short dental implants: a review of the literature                                                                                                                      | Hasan, Istabrak; Bourauel, Christoph; Mundt, Torsten; Heinemann, Friedhelm                                                                                                 | 2013 |
| Oral microbiomes: more and more importance in oral cavity and whole body                                                                                                                                   | Gao, Lu; Xu, Tiansong; Huang, Gang; Jiang, Song; Gu, Yan; Chen, Feng                                                                                                       | 2018 |
| Osseointegration of sintered porous-surfaced and plasma spray-coated implants: An animal model study of early postimplantation healing response and mechanical stability                                   | Simmons, Craig A.; Valiquette, Nancy; Pilliar, Robert M.                                                                                                                   | 1999 |
| Modification of Ti6Al4V surfaces using collagen I, III, and fibronectin. I. Biochemical and morphological characteristics of the adsorbed matrix                                                           | Bierbaum, Susanne; Beutner, René; Hanke, Thomas; Scharnweber, Dieter; Hempel, Ute; Worch, Hartmut                                                                          | 2003 |
| Computational analyses of small endosseous implants in osteoporotic bone                                                                                                                                   | Wirth, A. J.; Müller, Ralph; van Lenthe, G. Harry                                                                                                                          | 2010 |
| Evaluation of 3D printed PCL/PLGA/β-TCP versus collagen membranes for guided bone regeneration in a beagle implant model                                                                                   | Won, J. Y.; Park, C. Y.; Bae, J. H.; Ahn, G.; Kim, C.; Lim, D. H.; Cho, D. W.; Yun, W. S.; Shim, J. H.; Huh, J. B.                                                         | 2016 |
| Posterior partially edentulous jaws, planning a rehabilitation with dental implants                                                                                                                        | Monteiro, Douglas R.; Silva, Emily VF; Pellizzer, Eduardo P.; Magro Filho, Osvaldo; Goiato, Marcelo C.                                                                     | 2015 |
| Osteoinductive implants: the mise-en-scene for drug-bearing biomimetic coatings                                                                                                                            | Liu, Yuelian; De Groot, K.; Hunziker, Ernst Bruno                                                                                                                          | 2004 |
| Basic peptide protamine exerts antimicrobial activity against periodontopathic bacteria                                                                                                                    | Miura, Tadashi; Iohara, Keishi; Kato, Tetsuo; Ishihara, Kazuyuki; Yoshinari, Masao                                                                                         | 2010 |
| A computed tomographic scan-derived customized surgical template and fixed prosthesis for flapless surgery and immediate loading of implants in fully edentulous maxillae: A prospective multicenter study | van Steenberghe, Daniel; Glauser, Roland; Blombäck, Ulf; Andersson, Matts; Schutyser, Filip; Pettersson, Andreas; Wendelhag, Inger                                         | 2005 |
| Dental implants in edentulous adults with cognitive disabilities: report of a pilot project                                                                                                                | Durham, Timothy M.; King, Thomas; Salinas, Thomas; Franco, Theodore; Ross, Jason                                                                                           | 2006 |
| Microleakage at the different implant abutment interface: A systematic review                                                                                                                              | Mishra, Sunil Kumar; Chowdhary, Ramesh; Kumari, Shail                                                                                                                      | 2017 |
| Influence of preparation and wall thickness on the resistance to fracture of zirconia implant abutments                                                                                                    | Att, Wael; Yajima, Nao-Daniel; Wolkewitz, Martin; Witkowski, Siegbert; Strub, Joerg Rudolf                                                                                 | 2012 |



|                                                                                                                                                                                                                |                                                                                                                                                               |      |
|----------------------------------------------------------------------------------------------------------------------------------------------------------------------------------------------------------------|---------------------------------------------------------------------------------------------------------------------------------------------------------------|------|
| PhyloToAST: Bioinformatics tools for species-level analysis and visualization of complex microbial datasets                                                                                                    | Dabdoub, Shareef M.; Fellows, Megan L.; Paropkari, Akshay D.; Mason, Matthew R.; Huja, Sarandeep S.; Tsigarida, Alexandra A.; Kumar, Purnima S.               | 2016 |
| Early implant loading after vertical ridge augmentation (VRA) using e-PTFE titaniumreinforced membrane and nano-structured hydroxyapatite: 2-year prospective study.                                           | Canullo, Luigi; Sisti, Angelo                                                                                                                                 | 2010 |
| Bone healing and mineralization, implant corrosion, and trace metals after nickel–titanium shape memory metal intramedullary fixation                                                                          | Ryhänen, J.; Kallioinen, M.; Serlo, W.; Perämäki, P.; Junila, J.; Sandvik, P.; Niemelä, E.; Tuukkanen, J.                                                     | 1999 |
| Current research in the pathogenesis of aseptic implant loosening associated with particulate wear debris                                                                                                      | Jiang, Yunpeng; Jia, Tanghong; Wooley, Paul H.; Yang, Shang-You                                                                                               | 2013 |
| Implant loading protocols for the partially edentulous posterior mandible.                                                                                                                                     | Cordaro, Luca; Torsello, Ferruccio; Rocuzzo, Mario                                                                                                            | 2009 |
| Biofilm Inactivation and prevention on common implant material surfaces by nonthermal DBD plasma treatment                                                                                                     | Ibis, Fatma; Oflaz, Hakan; Ercan, Utku Kürsat                                                                                                                 | 2016 |
| Nonlinear finite element analysis versus ex vivo strain gauge measurements on immediately loaded implants.                                                                                                     | Eser, Atilim; Akca, Kivanc; Eckert, Steven; Cehreli, Murat Cavit                                                                                              | 2009 |
| In vivo effects of RGD-coated titanium implants inserted in two bone-gap models                                                                                                                                | Elmengaard, Brian; Bechtold, Joan E.; Soballe, Kjeld                                                                                                          | 2005 |
| Removal torque values of titanium implants in the maxilla of miniature pigs.                                                                                                                                   | Buser, Daniel; Nydegger, Thomas; Hirt, Hans Peter; Cochran, David L.; Nolte, Lutz-Peter                                                                       | 1998 |
| Dental implants placed by undergraduate students: clinical outcomes and patients’/students’ perceptions                                                                                                        | Vandeweghe, Stefan; Koole, Sebastiaan; Younes, Faris; De Coster, Peter; De Bruyn, Hugo                                                                        | 2014 |
| Acid attack and cathepsin K in bone resorption around total hip replacement prosthesis                                                                                                                         | Konttinen, Yrjö T.; Takagi, Michiaki; Mandelin, Jami; Lassus, Jan; Salo, Jari; Ainola, Mari; Li, Tian-Fang; Virtanen, Ismo; Liljeström, Mikko; Sakai, Hideaki | 2001 |
| Influence of a Laser-Lok Surface on Immediate Functional Loading of Implants in Single-Tooth Replacement: Three-Year Results of a Prospective Randomized Clinical Study on Soft Tissue Response and Esthetics. | Guarnieri, Renzo; Grande, Maurizio; Ippoliti, Stefano; Iorio-Siciliano, Vincenzo; Riccitello, Francesco; Farronato, Davide                                    | 2015 |
| Increased bone formation around coated implants                                                                                                                                                                | Stadlinger, Bernd; Bierbaum, Susanne; Grimmer, Silke; Schulz, Matthias C.; Kuhlisch, Eberhard; Schamweber, Dieter; Eckelt, Uwe; Mai, Ronald                   | 2009 |
| Osseoperception: active tactile sensibility of osseointegrated dental implants                                                                                                                                 | Enkling, Norbert; Utz, Karl Heinz; Bayer, Stefan; Stern, Regina Mericske                                                                                      | 2010 |
| Long-term bone response to titanium implants coated with thin radiofrequent magnetron-sputtered hydroxyapatite in rabbits.                                                                                     | Mohammadi, Shams; Esposito, Marco; Hall, Jan; Emanuelsson, Lena; Krozer, Anatol; Thomsen, Peter                                                               | 2004 |
| Extramaxillary surgical technique: clinical outcome of 352 patients rehabilitated with 747 zygomatic implants with a follow-up between 6 months and 7 years                                                    | Maló, Paulo; de Araújo Nobre, Miguel; Lopes, Armando; Ferro, Ana; Moss, Steven                                                                                | 2015 |
| “All-on-4” immediate-function concept for completely edentulous maxillae: a clinical report on the medium (3 years) and long-term (5 years) outcomes                                                           | Maló, Paulo; de Araújo Nobre, Miguel; Lopes, Armando; Francischone, Carlos; Rigolizzo, Mauricio                                                               | 2012 |
| Injectable magnesium-enriched hydroxyapatite putty in peri-implant defects: a histomorphometric analysis in pigs.                                                                                              | Crespi, Roberto; Cappare, Paolo; Addis, Alessandro; Gherlone, Enrico                                                                                          | 2012 |
| A histomorphometric study of bone reactions to titanium implants in irradiated bone and the effect of hyperbaric oxygen treatment                                                                              | Johnsson, Ase A.; Sawaii, Toshihiro; Jacobsson, Magnus; Granström, Gösta; Turesson, Ingela                                                                    | 1999 |
| Alveolar Ridge and Maxillary Sinus Augmentation Using rh BMP-2: A Systematic Review                                                                                                                            | de Freitas, Rubens Moreno; Spin-Neto, Rubens; Junior, Elcio Marcantonio; Pereira, Luís Antônio Violin Dias; Wikesjö, Ulf ME; Susin, Cristiano                 | 2015 |
| The influence of clip material and cross sections of the bar framework associated with vertical misfit on stress distribution in implant-retained overdentures.                                                | dos Santos, Mateus Bertolini Fernandes; Bacchi, Atais; Corrêa-Sobrinho, Lourenço; Consani, Rafael Leonardo Xediek                                             | 2014 |
| Immediately loaded blade implant retrieved from a man after a 20-year loading period: a histologic and histomorphometric case report                                                                           | Di Stefano, Danilo; Iezzi, Giovanna; Scarano, Antonio; Perrotti, Vittoria; Piattelli, Adriano                                                                 | 2006 |
| In vitro study of the influence of the type of connection on the fracture load of zirconia abutments with internal and external implant-abutment connections                                                   | Sailer, Irena; Sailer, Thomas; Stawarczyk, Bogna; Jung, Ronald Ernst; Hämmerle, C. H.                                                                         | 2009 |
| Histologic aspects of the bone and soft tissues surrounding three titanium non-submerged plasma-sprayed implants retrieved at autopsy: a case report                                                           | Piattelli, A.; Scarano, A.; Piattelli, M.; Bertolai, R.; Panzoni, E.                                                                                          | 1997 |
| Influence of nicotine administration on different implant surfaces: a histometric study in rabbits                                                                                                             | Stefani, Cristine M.; Nogueira Filho, Getúlio R.; Sallum, Enilson A.; De Toledo, Sérgio; Sallum, Antonio W.; Nociti, Francisco H.                             | 2002 |
| General and oral aspects of osteoporosis: a review                                                                                                                                                             | von Wowern, Nina                                                                                                                                              | 2001 |
| Implants inserted into homografts bearing fixed restorations.                                                                                                                                                  | Viscioni, Alessandro; Franco, Maurizio; Rigo, Leone; Guidi, Riccardo; Brunelli, Giorgio; Carinci, Francesco                                                   | 2009 |
| A retrospective case series of implants used to restore partially edentulous patients with implant-supported removable partial dentures: 31-month mean follow-up results.                                      | Grossmann, Yoav; Levin, Liran; Sadan, Avishai                                                                                                                 | 2008 |
| Are ceramic implants a viable alternative to titanium implants? A systematic literature review                                                                                                                 | Andriotti, Marina; Wenz, Hans J.; Kohal, Ralf-Joachim                                                                                                         | 2009 |
| Immediate rehabilitation of completely edentulous arches with a four-implant prosthesis concept in difficult conditions: an open cohort study with a mean follow-up of 2 years.                                | Malo, Paulo; Nobre, Miguel de Araujo; Lopes, Armando                                                                                                          | 2012 |
| Clinical and radiographic evaluation, following delivery of fixed reconstructions, at GBR treated titanium fixtures                                                                                            | Mayfield, Lisa; Skoglund, Annika; Nobréus, Nils; Attström, Rolf                                                                                               | 1998 |
| Dental implant thread pitch and its influence on the osseointegration process: an in vivo comparison study.                                                                                                    | Orsini, Ester; Giavaresi, Gianluca; Trirè, Alessandra; Ottani, Vittoria; Salgarello, Stefano                                                                  | 2012 |

|                                                                                                                                                                                                 |                                                                                                                                                                                      |      |
|-------------------------------------------------------------------------------------------------------------------------------------------------------------------------------------------------|--------------------------------------------------------------------------------------------------------------------------------------------------------------------------------------|------|
| An XPS and SEM evaluation of six chemical and physical techniques for cleaning of contaminated titanium implants                                                                                | Mouhyi, Jaafar; Sennerby, Lars; Pireaux, Jean-jacques; Dourov, Nicolas; Nammour, Samir; Van Reck, Jack                                                                               | 1998 |
| Functionalization of dental implant surfaces using adhesion molecules                                                                                                                           | Schliephake, H.; Scharnweber, D.; Dard, M.; Sewing, A.; Aref, A.; Roessler, S.                                                                                                       | 2005 |
| Immediate loading with complete implant-supported restorations in an edentulous heavy smoker: histologic and histomorphometric analyses.                                                        | Romanos, George E.; Johansson, Carina B.                                                                                                                                             | 2005 |
| Hydrothermal treatment for TiN as abrasion resistant dental implant coating and its fibroblast response                                                                                         | Shi, Xingling; Xu, Lingli; Munar, Melvin L.; Ishikawa, Kunio                                                                                                                         | 2015 |
| Use of endosseous one-piece yttrium-stabilized zirconia dental implants in premolar region: a two-year clinical preliminary report                                                              | Borgonovo, A.; Censi, R.; Dolci, M.; Vavassori, V.; Bianchi, A.; Maiorana, C.                                                                                                        | 2011 |
| The bases for using a particular occlusal design in tooth and implant-borne reconstructions and complete dentures                                                                               | Klineberg, Iven; Kingston, Dianna; Murray, Greg                                                                                                                                      | 2007 |
| Mechanical and technical risks in implant therapy                                                                                                                                               | Salvi, Giovanni E.; Bragger, Urs                                                                                                                                                     | 2009 |
| Hyaluronan supports recombinant human bone morphogenetic protein-2 induced bone reconstruction of advanced alveolar ridge defects in dogs. A pilot study                                        | Hunt, Dennis R.; Jovanovic, Sascha A.; Wikesjö, Ulf ME; Wozney, John M.; Bernard, George W.                                                                                          | 2001 |
| Outcomes and their measurement in clinical trials of endosseous oral implants                                                                                                                   | van Steenberghe, Daniel                                                                                                                                                              | 1997 |
| The team approach to managing dental implant complications: Strategies for treating periimplantitis                                                                                             | Rosen, Paul S.                                                                                                                                                                       | 2013 |
| Clinical Evaluation of Immediate Loading of Electroeroded Screw-Retained Titanium Fixed Prostheses Supported by Tilted Implant: A Multicenter Retrospective Study                               | Acocella, Alessandro; Ercoli, Carlo; Geminiani, Alessandro; Feng, Changyong; Billi, Mauro; Acocella, Gabriele; Giannini, Domenico; Sacco, Roberto                                    | 2012 |
| Diamondlike carbon coating as a galvanic corrosion barrier between dental implant abutments and nickel-chromium superstructures.                                                                | Ozkomur, Ahmet; Erbil, Mehmet; Akova, Tolga                                                                                                                                          | 2013 |
| Laser-Deposited Hydroxyapatite Films on Dental Implants–Biological Evaluation in vivo                                                                                                           | Dostálová, T.; Jelinek, M.; Himmlová, L.; Grivas, Ch                                                                                                                                 | 1998 |
| The effects of metal implants on inflammatory and healing processes                                                                                                                             | Tsaryk, Roman; Peters, Kirsten; Unger, Ronald E.; Scharnweber, Dieter; Kirkpatrick, C. James                                                                                         | 2007 |
| Short-term retrospective case series of implant-assisted removable partial dentures with locator abutments.                                                                                     | Ortiz-Puigpelat, Octavi; Gargallo-Albiol, Jordi; Hernández-Alfaro, Federico; Cabratosa-Termes, Josep                                                                                 | 2014 |
| Osteopontin at mineralized tissue interfaces in bone, teeth, and osseointegrated implants: ultrastructural distribution and implications for mineralized tissue formation, turnover, and repair | McKee, M. D.; Nanci, A.                                                                                                                                                              | 1996 |
| Morphometric Changes Induced by Cold Argon Plasma Treatment on Osteoblasts Grown on Different Dental Implant Surfaces.                                                                          | Canullo, Luigi; Genova, Tullio; Mandracci, Pietro; Mussano, Federico; Abundo, Roberto; Fiorellini, Joseph P.                                                                         | 2017 |
| Repair of symptomatic cartilage lesions of the knee: the place of autologous chondrocyte implantation.                                                                                          | Vanlauwe, Johan; Almqvist, Frederik; Bellemans, Johan; Huskin, Jean-Pierre; Verdonk, Rene; Victor, Jan                                                                               | 2007 |
| Influence of Alveolar Bone Loss and Different Alloys on the Biomechanical Behavior of Internal-and External-Connection Implants: A Three-Dimensional Finite Element Analysis.                   | Tsouknidas, Alexander; Lympoudi, Evdokia; Michalakis, Konstantinos; Giannopoulos, Dimitrios; Michailidis, Nikolaos; Pissiotis, Argirios; Fytanidis, Dimitrios; Kugiumtzis, Dimitrios | 2015 |
| Fixation of 5-unit implant-supported fixed partial dentures and resulting bone loading: a finite element assessment based on in vivo strain measurements.                                       | Karl, Matthias; Winter, Werner; Taylor, Thomas D.; Heckmann, Siegfried M.                                                                                                            | 2006 |
| Unconventional implants for distal cantilever fixed full-arch prostheses: a long-term evaluation of four cases.                                                                                 | Minoretti, Roger; Triaca, Albino; Saulacic, Nikola                                                                                                                                   | 2012 |
| Membranes and Bone Substitutes in a One-Stage Procedure for Horizontal Bone Augmentation: A Histologic Double-Blind Parallel Randomized Controlled Trial.                                       | Merli, Mauro; Moscatelli, Marco; Mariotti, Giorgia; Pagliaro, Umberto; Breschi, Lorenzo; Mazzoni, Annalisa; Nieri, Michele                                                           | 2015 |
| In vivo analysis of tissue response to plasma-treated collagen-I-coated titanium alloys                                                                                                         | Hauser, J.; Ring, A.; Schaffran, A.; Henrich, L.; Esenwein, S. A.; Steinau, H. U.; Stricker, I.; Langer, S.                                                                          | 2009 |
| Principles of attachment selection                                                                                                                                                              | Shafie, Hamid                                                                                                                                                                        | 2007 |
| Osseointegration of zirconia implants with different surface characteristics: an evaluation in rabbits.                                                                                         | Hoffmann, Oliver; Angelov, Nikola; Zafiropoulos, Gregory-George; Andreana, Sebastiano                                                                                                | 2012 |
| The Survival of Morse Cone-Connection Implants with Platform Switch.                                                                                                                            | Cassetta, Michele; Di Mambro, Alfonso; Giansanti, Matteo; Brandetti, Giulia                                                                                                          | 2016 |
| Biomechanics and peri-implantitis: The effect of a subcrestal wing-thread to decrease alveolar crestal bone strain. theory, finite element analysis, and clinical application.                  | Laster, Zvi; Weissberg, Ilan; Kablan, Fares                                                                                                                                          | 2012 |
| Fence technique for localized three-dimensional bone augmentation: a technical description and case reports.                                                                                    | Merli, Mauro; Mariotti, Giorgia; Moscatelli, Marco; Motroni, Alessandro; Mazzoni, Annalisa; Mazzoni, Simona; Nieri, Michele                                                          | 2015 |
| Bone and bone substitutes                                                                                                                                                                       | Nasr, Hisham F.; Aichelmann-Reidy, Mary Elizabeth; Yukna, Raymond A.                                                                                                                 | 1999 |
| Current Implant Designs to Maintain Crestal Bone and Gingiva                                                                                                                                    | Horowitz, R.                                                                                                                                                                         | 2008 |
| Application of confocal laser scanning microscopy in dentistry                                                                                                                                  | Rashid, Haroon                                                                                                                                                                       | 2014 |
| In Vivo Effect of Titanium Implants with Porous Zinc-Containing Coatings Prepared by Plasma Electrolytic Oxidation Method on Osseointegration in Rabbits.                                       | He, Jing; Feng, Wei; Zhao, Bao-Hong; Zhang, Wei; Lin, Zeng                                                                                                                           | 2018 |
| Biomechanical evaluation of amorphous calcium phosphate coated TNTZ implants prepared using a radiofrequency magnetron sputtering system                                                        | Shiraishi, Naru; Tu, Rong; Uzuka, Risa; Anada, Takahisa; Narushima, Takayuki; Goto, Takashi; Niinomi, Mitsuo; Sasaki, Keichi; Suzuki, Osamu                                          | 2012 |
| Multicenter Clinical Randomized Controlled Trial Evaluation of an Implant System Designed for Enhanced Primary Stability.                                                                       | Stanford, Clark M.; Barwacz, Chris; Raes, Stephanie; De Bruyn, Hugo; Cecchinato, Denis; Bittner, Nurit; Brandt, Jan                                                                  | 2016 |
| Peri-implantitis Induced by Stainless Steel Ligature in Beagle Dogs                                                                                                                             | Xingnan Lin, D. D. S.                                                                                                                                                                | 2017 |

|                                                                                                                                                                                                          |                                                                                                                                                                                 |      |
|----------------------------------------------------------------------------------------------------------------------------------------------------------------------------------------------------------|---------------------------------------------------------------------------------------------------------------------------------------------------------------------------------|------|
| Impact of Dynamic and Static Load on Bone Around Implants: An Experimental Study in a Rat Model.                                                                                                         | Yagihara, Atsushi; Kawasaki, Ryo; Mita, Atsushi; Takakuda, Kazuo                                                                                                                | 2016 |
| The rabbit as experimental model for research in implant dentistry and related tissue regeneration                                                                                                       | Stübinger, Stefan; Dard, Michel                                                                                                                                                 | 2013 |
| Placement of plate-form implants using osteotomes                                                                                                                                                        | Roberts, Ralph                                                                                                                                                                  | 2002 |
| Finite element analysis relative to the crestal position of a 3.0-mm-diameter implant.                                                                                                                   | León, Javier; Carrascosa, Alejandro; Rodríguez, Xavier; Ruiz-Magaz, Vanessa; Pascual, Andrés; Nart, José                                                                        | 2014 |
| Influence of superstructure geometry on the mechanical behavior of zirconia implant abutments: A finite element analysis                                                                                 | Geringer, Alexander; Diebels, Stefan; Nothdurft, Frank P.                                                                                                                       | 2014 |
| Effect of microthread design of dental implants on stress and strain patterns: a three-dimensional finite element analysis                                                                               | Amid, Reza; Raoofi, Saeed; Kадkhodazadeh, Mahdi; Movahhedi, Mohammad Reza; Khademi, Maryam                                                                                      | 2013 |
| Primary and Secondary Stability of Implants in Postextraction and Healed Sites: A Randomized Controlled Clinical Trial.                                                                                  | Malchiodi, Luciano; Balzani, Lucio; Cucchi, Alessandro; Ghensi, Paolo; Nocini, Pier Francesco                                                                                   | 2016 |
| Ultrasonic vs. drill osteotomy. A clinical and histologic study in the sheep mandible                                                                                                                    | Paolo Trisi, D.; Marco Colagiovanni, D.                                                                                                                                         | 2011 |
| The application of HA-coated dental implants in patients with severe bone defects                                                                                                                        | De Lange, G. L.; Kuiper, L.; Blijdorp, P. A.                                                                                                                                    | 1994 |
| Capability of differently charged plasma polymer coatings for control of tissue interactions with titanium surfaces                                                                                      | Schröder, K.; Finke, B.; Ohl, A.; Lüthen, F.; Bergemann, C.; Nebe, B.; Rychly, J.; Walschus, U.; Schlosser, M.; Liefeth, K.                                                     | 2010 |
| Comorbidity of periodontal disease: two sides of the same coin? An introduction for the clinician                                                                                                        | Holmstrup, Palle; Damgaard, Christian; Olsen, Ingar; Klinge, Björn; Flyvbjerg, Allan; Nielsen, Claus Henrik; Hansen, Peter Riis                                                 | 2017 |
| Performance of zirconia for dental healthcare                                                                                                                                                            | Silva, Nelson RFA; Sailer, Irena; Zhang, Yu; Coelho, Paulo G.; Guess, Petra C.; Zembic, Anja; Kohal, Ralf J.                                                                    | 2010 |
| Influence of anisotropic bone properties on the biomechanical behavior of the acetabular cup implant: a multiscale finite element study                                                                  | Nguyen, Vu-Hieu; Rosi, Giuseppe; Naili, Salah; Michel, Adrien; Raffa, Maria-Letizia; Bosc, Romain; Meningaud, Jean-Paul; Chappard, Christine; Takano, Naoki; Haiat, Guillaume   | 2017 |
| No influence of simultaneous bone-substitute application on the success of immediately loaded dental implants: a retrospective cohort study                                                              | Kopp, Sigmar; Behrend, Detlef; Kundt, Guenther; Ottl, Peter; Frerich, Bernhard; Warkentin, Mareike                                                                              | 2013 |
| Peri-implantitis: A re-view of the disease and report of a case treated with allograft to achieve bone regeneration                                                                                      | Rashid, H.; Sheikh, Z.; Vohra, F.; Hanif, A.; Glogauer, M.                                                                                                                      | 2015 |
| Microbial adhesion on novel yttria-stabilized tetragonal zirconia (Y-TZP) implant surfaces with nitrogen-doped hydrogenated amorphous carbon (aC: H: N) coatings                                         | Schlenle, Stefanie; Al-Ahmad, Ali; Kohal, Ralf Joachim; Bernsmann, Falk; Adolfsson, Erik; Montanaro, Laura; Palmero, Paola; Fürderer, Tobias; Chevalier, Jérôme; Hellwig, Elmar | 2016 |
| Ligature-Induced Peri-implant Bone Loss Around Loaded Zirconia and Titanium Implants.                                                                                                                    | Roehling, Stefan; Gahlert, Michael; Janner, Simone; Meng, Bo; Woelfler, Henriette; Cochran, David L.                                                                            | 2019 |
| Horizontal bone augmentation in full-arch maxillary implant-supported restorations: a preliminary clinical report                                                                                        | Taschieri, Silvio; Corbella, Stefano; Francetti, Luca; Del Fabbro, Massimo                                                                                                      | 2014 |
| Retrospective cohort clinical investigation of a dental implant with a narrow diameter and short length for the partial rehabilitation of extremely atrophic jaws                                        | Maló, Paulo S.; de Araújo Nobre, Miguel A.; Lopes, Armando V.; Ferro, Ana S.                                                                                                    | 2017 |
| Qualitative assessment of natural apatite in vitro and in vivo                                                                                                                                           | Guizzardi, Stefano; Montanari, Cristiana; Migliaiaccio, Stefano; Strocchi, Rita; Solmi, Rossella; Martini, Desiree; Ruggeri, Alessandro                                         | 2000 |
| Corrosion and biocompatibility of orthopedic implants                                                                                                                                                    | Hallab, Nadim James; Urban, Robert M.; Jacobs, Joshua J.                                                                                                                        | 2004 |
| Long-term marginal periimplant bone loss in edentulous patients.                                                                                                                                         | Carlsson, Gunnar E.; Lindquist, Lars W.; Jemt, Torsten                                                                                                                          | 2000 |
| Low BMD affects initial stability and delays stem osseointegration in cementless total hip arthroplasty in women: a 2-year RSA study of 39 patients                                                      | Aro, Hannu T.; Alm, Jessica J.; Moritz, Niko; Mäkinen, Tatu J.; Lankinen, Petteri                                                                                               | 2012 |
| Combined collagen membrane and hydroxyapatite/collagen chondroitin-sulfate spacer placement in the treatment of 2-wall intrabony defects in chronic adult and rapidly progressive periodontitis patients | Benque, Edmond; Zahedi, Shahram; Brocard, Daniel; Oscaby, Françoise; Justum, Pierre; Brunel, Gérard                                                                             | 1997 |
| Overview of clinical trials on endosseous implants                                                                                                                                                       | Fritz, Michael E.                                                                                                                                                               | 1997 |
| Zirconia in dentistry: part 2. Evidence-based clinical breakthrough                                                                                                                                      | Vagkopoulou, Thaleia                                                                                                                                                            | 2009 |
| Plasma of Argon Cleaning Treatment on Implant Abutments in Periodontally Healthy Patients: Six Years Postloading Results of a Randomized Controlled Trial.                                               | Canullo, Luigi; Tallarico, Marco; Penarrocha, Miguel; Corrente, Giuseppe; Fiorellini, Joseph; Penarrocha, David                                                                 | 2017 |
| The dynamics in implantation for patients with clefts                                                                                                                                                    | Nagasao, Tomohisa; Miyamoto, Junpei; Jin, Hongmei; Tamaki, Tamotsu; Isshiki, Yasushige; Kaneko, Tsuyoshi; Nakajima, Tatsuo                                                      | 2006 |
| Advanced reconstructive technologies for periodontal tissue repair                                                                                                                                       | Ramseier, Christoph A.; Rasperini, Giulio; Batia, Salvatore; Giannobile, William V.                                                                                             | 2012 |
| Stem cells in dentistry—Part II: Clinical applications                                                                                                                                                   | Egusa, Hiroshi; Sonoyama, Wataru; Nishimura, Masahiro; Atsuta, Ikiro; Akiyama, Kentaro                                                                                          | 2012 |
| The 300 Most-Cited Articles in Implant Dentistry.                                                                                                                                                        | Antonio Alarcon, Marco; Esparza, Diana; Montoya, Carmen; Monje, Alberto; Faggion Jr, Clovis Mariano                                                                             | 2017 |
| The effect of hyaluronan on osteoblast proliferation and differentiation in rat calvarial-derived cell cultures                                                                                          | Huang, L.; Cheng, Y. Y.; Koo, P. L.; Lee, K. M.; Qin, L.; Cheng, J. C. Y.; Kumta, S. M.                                                                                         | 2003 |
| Methodology and criteria in evaluation of dental endosseous implants                                                                                                                                     | Langeland, Kaare; Sp'angberg, Larz                                                                                                                                              | 1975 |
| Zygomatic implant placement in conjunction with sinus bone grafting: the “extended sinus elevation technique.” a case-cohort study                                                                       | Hinze, Marc; Vrielinck, Luc; Thalmair, Tobias; Wachtel, Hannes; Bolz, Wolfgang                                                                                                  | 2013 |
| Section plane selection influences the results of histomorphometric studies: the example of dental implants                                                                                              | Kopp, Sigmar; Warkentin, Mareike; Öri, Ferenc; Ottl, Peter; Kundt, Günther; Frerich, Bernhard                                                                                   | 2012 |

|                                                                                                                                                                                              |                                                                                                                                                                                                                                                                                           |      |
|----------------------------------------------------------------------------------------------------------------------------------------------------------------------------------------------|-------------------------------------------------------------------------------------------------------------------------------------------------------------------------------------------------------------------------------------------------------------------------------------------|------|
| A Study of Osseointegration—3-D Culture of KUSA/A1 Cells with a Collagen Scaffold on Titanium Implants with Different Surface Modifications—                                                 | MIKAMI, Toshiko; KUMABE, Shunji; IWAI, Yasutomo                                                                                                                                                                                                                                           | 2010 |
| Research of the relief and element composition of the surface coatings based on hydroxyapatite implants from titanium alloys                                                                 | Pogrebjak, A. D.; Krivets, A. S.; Dyadyura, K. A.; Maksakova, O. V.; Shaimardanov, Zh K.; Peplinska, B.                                                                                                                                                                                   | 2016 |
| Tibial component fixation with a peri-apatite coating: evaluation by radiostereometric analysis in a canine total knee arthroplasty model                                                    | Allen, Matthew J.; Leone, Kendall A.; Dunbar, Michael J.; Race, Amos; Rosenbaum, Paula F.; Sacks, Jonathan M.                                                                                                                                                                             | 2012 |
| Evaluation of Different Combinations of Biphasic Calcium Phosphate and Growth Factors for Bone Formation in Calvarial Defects in a Rabbit Model.                                             | Chung, Sung-Min; Jung, In Kwon; Yoon, Byung-Ho; Choi, Bok Ryul; Kim, David M.; Jang, Jung Sun                                                                                                                                                                                             | 2016 |
| Periimplant Bone Healing under Experimental Hepatic Osteodystrophy Induced by a Choline-Deficient Diet: A Histomorphometric Study in Rats                                                    | Gorustovich, Alejandro; de los Angeles Esposito, Maria; Guglielmotti, Maria Beatriz; Juan Giglio, Maximo                                                                                                                                                                                  | 2003 |
| Deproteinized bovine bone xenograft                                                                                                                                                          | Stavropoulos, Andreas                                                                                                                                                                                                                                                                     | 2008 |
| Understanding biomaterial-tissue interface quality: combined in vitro evaluation                                                                                                             | Gasik, Michael                                                                                                                                                                                                                                                                            | 2017 |
| Biomechanics of jaw bone considering structural properties of trabecular bone                                                                                                                | Matsunaga, Satoru; Takano, Naoki; Tamatsu, Yuichi; Abe, Shinichi; Ide, Yoshinobu                                                                                                                                                                                                          | 2011 |
| Bone Response to Four Dental Implants with Different Surface Topographies: A Histologic and Histometric Study in Minipigs.                                                                   | Kalemaj, Zamira; Scarano, Antonio; Valbonetti, Luca; Rapone, Biagio; Grassi, Felice Roberto                                                                                                                                                                                               | 2016 |
| Sinus augmentation using rhBMP-2-loaded synthetic bone substitute with simultaneous implant placement in rabbits                                                                             | Joo, Myung-Jae; Cha, Jae-Kook; Lim, Hyun-Chang; Choi, Seong-Ho; Jung, Ui-Won                                                                                                                                                                                                              | 2017 |
| Implantable zirconia bioceramics for bone repair and replacement: A chronological review                                                                                                     | Afzal, Adeel                                                                                                                                                                                                                                                                              | 2014 |
| Paranasal bone: the prime factor affecting the decision to use transsinus vs zygomatic implants for biomechanical support for immediate function in maxillary dental implant reconstruction. | Jensen, Ole T.; Adams, Mark W.; Smith, Edmund                                                                                                                                                                                                                                             | 2012 |
| The influence of extraction on the stability of implanted titanium microscrews: a biomechanical and histomorphometric study.                                                                 | Zheng, Leilei; Tang, Tian; Deng, Feng; Zhao, Zhihe                                                                                                                                                                                                                                        | 2009 |
| Combined immediate loading of zygomatic and mandibular implants: a preliminary 2-year report of 19 patients.                                                                                 | Butura, Caesar C.; Galindo, Daniel F.                                                                                                                                                                                                                                                     | 2014 |
| Comparing the influence of crestal cortical bone and sinus floor cortical bone in posterior maxilla bi-cortical dental implantation: a three-dimensional finite element analysis             | Yan, Xu; Zhang, Xinwen; Chi, Weichao; Ai, Hongjun; Wu, Lin                                                                                                                                                                                                                                | 2015 |
| Effectiveness of resonance frequency in predicting orthopedic implant strength and stability in an in vitro osseointegration model                                                           | Isaacson, Brad M.; Vance, Richard E.; Chou, Teri G. Rosenbaum; Bloebaum, Roy D.; Bachus, Kent N.; Webster, Joseph B.                                                                                                                                                                      | 2009 |
| Correlation between the bone density recorded by a computerized implant motor and by a histomorphometric analysis: a preliminary in vitro study on bovine ribs                               | Iezzi, Giovanna; Scarano, Antonio; Di Stefano, Danilo; Arosio, Paolo; Doi, Kazuya; Ricci, Laura; Piattelli, Adriano; Perrotti, Vittoria                                                                                                                                                   | 2015 |
| Overdentures on Implants for Better Quality of Life Among the Fully Edentulous Patients—Case Reports                                                                                         | Nikolovska, Julijana; Petrovski, Dragan; Petricevic, Nikola; Kapusevska, Biljana; Korunoska-Stevkovska, Vesna                                                                                                                                                                             | 2015 |
| Vojin Savić, Stevo Najman, Dragan Mihailović, Perica Vasiljević, Zoran Stojanović, et al.                                                                                                    | Ignjatović, Nenad; Ajduković, Zorica                                                                                                                                                                                                                                                      | 2013 |
| Best practice: surgeon driven application in pelvic operations                                                                                                                               | Krueger, Thilo B.; Wegner, Celine; Somerlik-Fuchs, Karin H.; Hoffmann, Klaus-Peter; Mattmueller, Rudi                                                                                                                                                                                     | 2016 |
| Cell culture methods for testing biocompatibility                                                                                                                                            | Pizzoferrato, Arturo; Ciapetti, Gabriela; Stea, Susanna; Cenni, Elisabetta; Arciola, Carla Renata; Granchi, Donatella                                                                                                                                                                     | 1994 |
| Does periodontal tissue regeneration really work?                                                                                                                                            | Bosshardt, Dieter D.; Sculean, Anton                                                                                                                                                                                                                                                      | 2009 |
| Integrin 2 1 plays a critical role in osteoblast response to micron-scale surface structure and surface energy of titanium substrates                                                        | Ti, Titanium                                                                                                                                                                                                                                                                              | 2008 |
| Systemic and local effects of radiotherapy: an experimental study on implants placed in rats                                                                                                 | da Cruz Vegian, Mariana Raquel; Costa, Bruno César Almeida; de Fátima Santana-Melo, Gabriela; Godoi, Fernanda Herrera Costa; Kaminagakura, Estela; Tango, Rubens Nisie; do Prado, Renata Falchete; de Oliveira, Luciane Dias; Federico, Claudio Antonio; Avelino, Sarah de Oliveira Marco | 2019 |
| Bone physiology of tooth movement, ankylosis, and osseointegration                                                                                                                           | Roberts, W. Eugene                                                                                                                                                                                                                                                                        | 2000 |
| Treatment of Circumferential Defects with Osseointegrative Xenografts of Different Porosities: A Histological, Histometric, Resonance Frequency Analysis, and Micro-CT Study in Dogs         | Antunes, Antonio Azoubel; Grossi-Oliveira, Gustavo Augusto; Martins-Neto, Evandro Carneiro; De Almeida, Adriana Luisa Gonçalves; Salata, Luiz Antonio                                                                                                                                     | 2015 |
| Chitosan as a barrier membrane material in periodontal tissue regeneration                                                                                                                   | Xu, Chun; Lei, Chang; Meng, Liuyan; Wang, Changning; Song, Yaling                                                                                                                                                                                                                         | 2012 |
| Dental Medicine Nanosystems: Nanoparticles and their use in Dentistry and Oral Health Care                                                                                                   | Lboutounne, Hassan                                                                                                                                                                                                                                                                        | 2017 |
| Thermally Sprayed Porous PEEK Coating for Biomedical Implants                                                                                                                                | Taylor, Satish; Vashishtha, Nitesh; Modi, Ankur; Modi, S. C.                                                                                                                                                                                                                              | 2019 |
| Cytocompatible and Anti-bacterial Adhesion Nanotextured Titanium Oxide Layer on Titanium Surfaces for Dental and Orthopaedic Implants                                                        | Ferraris, Sara; Cochis, Andrea; Cazzola, Martina; Tortello, Mauro; Scalia, Alessandro; Spriano, Silvia; Rimondini, Lia                                                                                                                                                                    | 2019 |
| The 5 Hallmarks of Biomaterials Success: An Emphasis on Orthopaedics                                                                                                                         | Williams, Dustin L.; Isaacson, Brad M.                                                                                                                                                                                                                                                    | 2014 |
| Biomaterial-Associated Infection: Locating the Finish Line in the Race for                                                                                                                   | Busscher, Henk J.                                                                                                                                                                                                                                                                         |      |
| Interventions to Maintain Locator-Retained Mandibular Overdentures on Both External Hex and Internal Connection Implants: A Retrospective Study.                                             | Fernandez-Estevan, Lucia; Montero, Javier; Selva Otaolaurruchi, Eduardo J.; Ruiz, Sola; Fernanda, Maria                                                                                                                                                                                   | 2018 |
| Plasma rich in growth factors for the treatment of ocular surface diseases                                                                                                                   | Anitua, Eduardo; Muruzabal, Francisco; de la Fuente, María; Merayo, Jesús; Durán, Juan; Orive, Gorka                                                                                                                                                                                      | 2016 |

|                                                                                                                                                                                              |                                                                                                                                                                           |      |
|----------------------------------------------------------------------------------------------------------------------------------------------------------------------------------------------|---------------------------------------------------------------------------------------------------------------------------------------------------------------------------|------|
| Predictive values of resonance frequency analysis as a diagnostic tool in palatal implant loss                                                                                               | Wieczorek, Katja; Harzer, Winfried; Wehrbein, Heinrich; Moergel, Maximilian; Kunkel, Martin; Jung, Britta A.                                                              | 2019 |
| The effect of titanium dental implant surfaces with varying microtopography on the temporal expression of the osteogenic phenotype in vitro                                                  | Knabe, C.; Naumann, I.; Houshmand, A.; Lopez-Heredia, M. A.; Stiller, M.; Niem, T.; Wostmann, B.; Hiibner, A.; Miiller-Mai, C.                                            | 2015 |
| Dental implant surface chemistry and energy alter macrophage activation in vitro                                                                                                             | Boyan, Barbara D.; Olivares-Navarrete, Rene                                                                                                                               | 2016 |
| The Rationale and Technique in Relation to Immediate Implant Stability                                                                                                                       | Wu, Chun-Ying; Yang, Chin-Hua; Huang, Peng-Hao; Chen, Kuo-Ching                                                                                                           | 2014 |
| Myomucosal cheek flaps: applications in intraoral reconstruction using three different techniques                                                                                            | Ferrari, S.                                                                                                                                                               | 2011 |
| Comparison of titanium and FGM dental implants with different coating types                                                                                                                  | Aldousari, Saad M.; Fouda, Noha; Hedia, Hassan S.; AlThobiani, Faisal WH                                                                                                  | 2018 |
| Implant design and intraosseous stability of immediately placed implants: a human cadaver study                                                                                              | Akca, Kivanc; Cehreli, Murat Cavit                                                                                                                                        | 2004 |
| 4 Nanotechnology in dental implants                                                                                                                                                          | Jurczyk, Karolina; Braegger, Urs; Jurczyk, Mieczyslaw                                                                                                                     | 2018 |
| Biomaterial-Associated Infection: Locating the Finish Line in the Race for the Surface                                                                                                       | TISSUE, BACTERIA VERSUS HOST                                                                                                                                              |      |
| UNCORRECTED PROOFS                                                                                                                                                                           | Toffler, Michael; Rosen, Paul S.                                                                                                                                          | 2016 |
| The oral biome in the aetiology and management of dental disease: Current concepts and ethical considerations                                                                                | Ma, Yonghui; Oliver, Richard; Chen, Hua                                                                                                                                   | 2019 |
| Periprocedural myocardial infarction enhances the predictive value of inflammatory biomarkers for patients with obstructive coronary artery disease after implantation of drug-eluting stent | Jesika, Anastasia; Zuo-Ying, Hu; Kan, Jing; Shao-Liang, Chen                                                                                                              | 2015 |
| Prevalence of short implants use in the jaws: a retrospective pilot study.                                                                                                                   | GUMES, Irving; GUEDES, Gabriel; SÓRIO, Ana Luisa; CYSNEIROS, Henrique; FALCÃO, Antônio; MIRANDA, Dario Augusto Oliveira                                                   | 2015 |
| Early osseointegration of implants with cortex-like TiO 2 coatings formed by micro-arc oxidation: A histomorphometric study in rabbits                                                       | Zhou, Hong-zhi; Liu, Lin; Chen, Xiao-dong; Wang, Wei-qiang; Ma, Guo-wu; Su, Yu-cheng; Qi, Min; Shi, Bin                                                                   | 2017 |
| Tissue Engineering and Dental Implantology: Biomaterials, New Technologies, and Stem Cells                                                                                                   | Galindo-Moreno, Pablo                                                                                                                                                     |      |
| Osseointegration of Orthopaedic Implants                                                                                                                                                     | Goharian, Amirhossein                                                                                                                                                     | 2019 |
| Stress Distribution in an Implant-Supported Mandibular Complete Denture Using Different Cantilever Lengths and Occlusal Coating Materials                                                    | De Medeiros, Rodrigo Antonio; Goiato, Marcelo Coelho; Pesqueira, Aldiéris Alves; Vechiato, Filho; José, Aljomar; Bonatto, Liliane da Rocha; dos Santos, Daniela Micheline | 2017 |
| Effect of alendronate on bone remodeling around implant in the                                                                                                                               | Park, R.; Kim, J. H.; Choi, H.; Park, Y. B.; Jung, H. S.; Moon, H. S.                                                                                                     | 2003 |
| 4 Sequelae Caused by Wearing Complete Dentures                                                                                                                                               | THEIR, DENTURES IN                                                                                                                                                        | 2013 |
| A Prospective Clinical Study on Titanium Implants in the Zygomatic Arch for Prosthetic Rehabilitation of the Atrophic Edentulous Maxilla with a Follow-Up of 6 Months to 5 Years             | Fortes, Vanessa                                                                                                                                                           |      |
| A study of the bone healing kinetics of plateau versus screw root design titanium dental implants                                                                                            | Coelho, Paulo; Polyzois, Ioannis; Stassen, Leo F. A.; Claffey, Noel                                                                                                       | 2008 |
| The effects of implant surface roughness and surgical technique on implant fixation in an in vitro model                                                                                     | Jansen, John A.                                                                                                                                                           | 2006 |
| Extraction Site Management for Ridge Preservation and Implant Site Development                                                                                                               | Bartee, Barry; Cullum, Daniel R.                                                                                                                                          | 2015 |
| 2.1. 1 Clinical demands and purpose of surface modification                                                                                                                                  | Hanawa, T.                                                                                                                                                                | 2018 |
| Micromovement measurements of endosseous dental implants with 3D Digital Image Correlation (DIC) method                                                                                      | Rodrigues, A. T.; Neto, B. A.; Nicolau, C. P.                                                                                                                             | 2011 |
| implants use in the jaws: a retrospective pilot study                                                                                                                                        | GUMES, Irving; GUEDES, Gabriel; SÓRIO, Ana Luisa; CYSNEIROS, Henrique; FALCÃO, Antônio; MIRANDA, Dario Augusto Oliveira                                                   | 2015 |
| Computational structural analysis of dental implants using radial point interpolation meshless methods                                                                                       | Coelho, C. C. C.; Belinha, J.; Jorge, RM Natal                                                                                                                            | 2019 |
| Functionalization of Titanium surface with Chitosan via silanation: 3D CLSM imaging of cell biocompatibility behaviour                                                                       | Attik, G. N.; D'Almeida, M.; Toury, B.; Grosogeat, B.                                                                                                                     | 2013 |
| Immunomodulation for Biomaterial Applications                                                                                                                                                | Knopf-Marques, Helena; Paiva, Lilian; Prévot, Flavie; Barthès, Julien                                                                                                     |      |
| Alveolar ridge alterations in the maxillary anterior region after tooth extraction through orthodontic forced eruption for implant site development: a clinical CBCT study.                  | Papadopoulou, Alexandra K.; Papageorgiou, Spyridon N.; Hatzopoulos, Stavros A.; Tsirlis, Anastasios; Athanasiou, Athanasios E.                                            | 2019 |
| Beta/tricalcium phosphate for Ridge Augmentation with Simultaneous Implant Placement in the Esthetic Zone-Clinical Case and Surgical Considerations                                          | Božidar Brkovic, D. D. S.                                                                                                                                                 |      |
| Swedish Dental Journal Supplement 188, 2007                                                                                                                                                  | Roos-Jans'aker, Ann-Marie                                                                                                                                                 | 2007 |
| Long term results of therapy of sleep apnea syndrome by electromyostimulation (EMS)                                                                                                          | Ludwig, A.; Hegewald, R.                                                                                                                                                  | 2011 |
| A retrospective study on interobserver variation of Pap smear reporting at Kenyatta National Hospital (KNH) cytology laboratory, Nairobi, Kenya                                              | Mwaniki, Jackrogers Njuki; Waweru, Wairimu; Ndungu, Joseph Rugumi; Muchiri, Lucy Wangari                                                                                  | 2014 |

|                                                                                                                                                                                                                     |                                                                                                                                                           |      |
|---------------------------------------------------------------------------------------------------------------------------------------------------------------------------------------------------------------------|-----------------------------------------------------------------------------------------------------------------------------------------------------------|------|
| Plant-derived rhamnogalacturonan-i's modulate proinflammatory cytokine gene expression in neutrophils stimulated by E. coli LPS and P. gingivalis bacteria                                                          | Folkert, J.; Mieszkowska, A.; Burke, B.; Addison, O.; Gurzawska, K.                                                                                       | 2018 |
| Interdisciplinary Planning                                                                                                                                                                                          | Phillips, Keith M.                                                                                                                                        | 2017 |
| Marginal bone and soft tissue behavior following platform switching abutment connection/disconnection—a dog model study                                                                                             | Blanco, Juan                                                                                                                                              | 2014 |
| Treatment Complications in the Esthetic Zone                                                                                                                                                                        | El Askary, Abd El Salam                                                                                                                                   | 2008 |
| Osteointegration of the bone tissue with titanium implants                                                                                                                                                          | Dedukh, Ninel; Malyskhina, Svitlana                                                                                                                       | 2010 |
| Clinical performance of one-piece zirconia dental implants: A systematic review                                                                                                                                     | ArRejaie, Aws S.; Al-Hamdan, Rana S.; Basunbul, Ghadeer I.; Abduljabbar, Tariq; Al-Aali, Khulud A.; Labban, Nawaf                                         | 2019 |
| Using MicroCT to Assess Periodontal Regeneration Outcomes—Comparison of Image-Based and Histologic Results: A Case Report.                                                                                          | Rebaudi, Alberto; Trisi, Paolo; Pagni, Giorgio; Wang, Hom-Lay                                                                                             | 2017 |
| Bone Particles and the Undersized Surgical Technique                                                                                                                                                                | Jansen, J. A.                                                                                                                                             | 2010 |
| Zirconia compared to titanium dental implants in preclinical studies—A systematic review and meta-analysis                                                                                                          | Roehling, Stefan; Schlegel, Karl A.; Woelfler, Henriette; Gahlert, Michael                                                                                | 2019 |
| Oral and Maxillofacial Surgery Advances in Implant Dentistry                                                                                                                                                        | AUGMENTATION, BONE GRAFT                                                                                                                                  | 2000 |
| Bone morphology changes around two types of bone-level implants installed in fresh extraction sockets—a histomorphometric study in Beagle dogs                                                                      | Jansen, John A.                                                                                                                                           | 2014 |
| Bone characteristics and implant stability                                                                                                                                                                          | Sabeva, Elitsa; Peev, Stefan; Miteva, Mariya; Georgieva, Milena                                                                                           | 2017 |
| Stability of intraosseous dental implants with guided bone regeneration (in vivo experiment in dogs).                                                                                                               | Indjova, Jermen; Fakih, Kh; Sivrev, D.; Yovchev, D.; Chaprazov, Ts                                                                                        | 2014 |
| Biofilm formation on polyetheretherketone and titanium surfaces                                                                                                                                                     | Barkarmo, Sargon; Longhorn, Daniel; Leer, Kiran; Johansson, Carina B.; Stenport, Victoria; Franco-Tabares, Sebastian; Kuehne, Sarah A.; Sammons, Rachel   | 2019 |
| Effect of Biologic Aging of Implants on Osseointegration in the Dog.                                                                                                                                                | Hwang, Byung-Moon; Park, Yong Bum; Lee, Jae Hoon                                                                                                          | 2019 |
| ‘Go graftless’                                                                                                                                                                                                      | KHAN, DR BURZIN                                                                                                                                           |      |
| Tooth Extraction and                                                                                                                                                                                                | Preservation, Site                                                                                                                                        | 2013 |
| 10 Biomaterials and Immune                                                                                                                                                                                          | Prakasam, Sivaraman; Gajendrareddy, Praveen; Louie, Christopher; Lee, Clarence; Bertassoni, Luiz E.                                                       |      |
| Effects of occlusal trauma on the periodontium, alveolar bone, temporomandibular joint and central nervous system                                                                                                   | Ispas, Ana; Crăciun, Antarinia; Kui, Andreea; Lascu, Liana; Constantiniuc, Mariana                                                                        | 2018 |
| Tooth Extraction and Site Preservation                                                                                                                                                                              | Caplanis, Nicholas; Lozada, Jaime L.; Mesquida, Juan                                                                                                      | 2013 |
| CONTEMPORARY CONCEPTS AND TREATMENT                                                                                                                                                                                 | SEOTNTEGRATION, OS                                                                                                                                        |      |
| Biomechanical Behaviors of Implant-Supported Zirconia Restorations Cemented to Novel Screw-Retained Abutment Systems: A Three-Dimensional Finite Element Analysis Study                                             | KALELİ, Necati; URAL, Çağrı                                                                                                                               |      |
| Multimodal analysis of the tissue response to a bone-anchored hearing implant: a two-year case report of a patient with recurrent inflammation and pain                                                             | Calon, Tim GA; Johansson, Martin L.; Omar, Omar; Shah, Furqan; Budding, Dries; Trobos, Margarita; Thomson, Peter; Stokroos, Robert-Jan; Palmquist, Anders | 2019 |
| Three-dimensional finite-element analysis of osseointegrated dental implants                                                                                                                                        | Baggi, Luigi; Cappelloni, Ilaria; Maceri, Franco; Vairo, Giuseppe                                                                                         | 2007 |
| Histologic and Clinical Evaluation of a Bioactive Calcium-Phosphosilicate Bone Graft                                                                                                                                | Gonshor, Aron; Lanka Mahesh, B. D. S.                                                                                                                     |      |
| Occlusal Principles and Considerations for Implants: An Overview                                                                                                                                                    | Paliwal, Siddhartha; Saxena, Deepesh; Mittal, Rohit; Chaudhary, Shivangi                                                                                  | 2014 |
| Evaluating the role of extracellular matrix molecules and enzymes in periodontitis.                                                                                                                                 | Rezvi, Fathima Bareera; Vishnu Priya, V.; Gayathri, R.                                                                                                    | 2018 |
| Minimally Invasive Complete Arch Treatment: The Versatility of Angled Implants                                                                                                                                      | Jensen, Ole T.; Cullum, Daniel R.                                                                                                                         | 2015 |
| MATRITM BONE                                                                                                                                                                                                        | Code, Re-order                                                                                                                                            | 2017 |
| Division of Advanced Ceramics, Nagoya Institute of Technology, Nagoya, Japan                                                                                                                                        | Kasuga, Toshihiro                                                                                                                                         | 2019 |
| IMPLANT SURVIVAL: BIOLOGICAL AND MECHANICAL INFLUENCES ON IMPLANTS'LIFE SPAN                                                                                                                                        | Rini, Maria Sofia; Borea, Giorgio; Nuzzolese, Emilio; Meleo, Deborah; Betti, Dario                                                                        |      |
| Tissue engineering applications and nanobiomaterials in periodontology and implant dentistry                                                                                                                        | Keceli, Huseyin Gencay; Akman, Abdullah Cevdet; Bayram, Cem; Nohutcu, Rahime Meral                                                                        | 2016 |
| E unctonal stability of the dentition is a prerequi-site to normal mastication, and periodic mea                                                                                                                    | Efstratis Papazoglou, D. D. S.                                                                                                                            |      |
| TiO 2-Modified Zirconia Surface Improves Epithelial Cell Attachment.                                                                                                                                                | Riivari, Sini; Shahramian, Khalil; Kangasniemi, Ilkka; Willberg, Jaana; Närhi, Timo O.                                                                    | 2019 |
| COMPARISON OF BIOMECHANICAL EFFECTS OF DIFFERENT DEGREES OF PLATFORM SWITCHED IMPLANTS ON THE BONE BY VARYING SUPERSTRUCTURE PROSTHETIC MATERIALS AND LOADING CONDITIONS: A THREE DIMENSIONAL FINITE ELEMENT STUDY” | Pushkar, Desai; Kumar, Vyas Anup                                                                                                                          |      |
| PROSTHODONTICS                                                                                                                                                                                                      | Lachmann, S.; Kimmerle-Müller, E.; Axmann, D.; Gomez-Roman, G.                                                                                            | 2008 |

|                                                                                                                                                                                               |                                                                                                                                                                                            |      |
|-----------------------------------------------------------------------------------------------------------------------------------------------------------------------------------------------|--------------------------------------------------------------------------------------------------------------------------------------------------------------------------------------------|------|
| On the Significance and Predicted Functional Effects of the Crown-to-Implant Ratio: a Finite Element Study of Long-Term Implant Stability Using High-Resolution, Nonlinear Numerical Analysis | Sego, T. J.; Hsu, Yung-Ting; Chu, Tien-Min Gabriel; Tovar, Andres                                                                                                                          | 2016 |
| ENDO TRIBUNE                                                                                                                                                                                  | Musikant, Barry Lee                                                                                                                                                                        | 2010 |
| Part 3: Implant Surgery                                                                                                                                                                       | Rasmusson, Lars; Sennerby, Lars; Dahlin, Christer; Rosenquist, Bo; Sándor, George KB; Lam, David K.; Ylikontiola, Leena P.; Kainulainen, Vesa T.; Oikarinen, Kyösti S.; Clokie, Cameron ML | 2010 |
| The effect of zirconia and titanium implant abutments on light reflection of the supporting soft tissues                                                                                      | de Roode, Rowland; de Wit, Gerard C.; Cune, Marco S.                                                                                                                                       | 2010 |
| Clinical and histologic evaluation of fresh frozen human bone grafts for horizontal reconstruction of maxillary alveolar ridges                                                               | Roberto Di Lenarda, D. D. S.                                                                                                                                                               | 2011 |
| Knowledge Gaps in Oral and Maxillofacial Surgery: a Systematic Mapping                                                                                                                        | Österberg, Marie; Holmlund, Anders; Sunzel, Bo; Tranaeus, Sofia; Twetman, Svante; Lund, Bodil                                                                                              | 2017 |
| Biomaterials for Dental Applications                                                                                                                                                          | Tuzuner, Tamer                                                                                                                                                                             |      |
| In Vitro Study on Biological Potential of Tissue-Engineered Cage by Using Surface-Modified Technique: A Preliminary Evaluation                                                                | Guo, Hong-Gang; Guo, Hong-Sheng; Yao, Fang-Lian; Yang, Shao-Guang; Chen, Zhi; Wang, Tao                                                                                                    | 2016 |
| Poly (propylene fumarate) and poly (DL-lactic-co-glycolic acid) as scaffold materials for solid and foam-coated composite tissue-engineered constructs for cranial reconstruction             | Dean, David; Topham, Neal S.; Meneghetti, S. Cristina; Wolfe, Michael S.; Jepsen, Karl; He, Shulin; Chen, Jeffrey E.-K.; Fisher, John P.; Cooke, Malcolm; Rimnac, Clare                    | 2003 |
| Synthesis, characterization and in vitro activity of a surface-attached antimicrobial cationic peptide                                                                                        | Chen, Renxun; Cole, Nerida; Willcox, Mark DP; Park, Josephine; Rasul, Riaz; Carter, Elizabeth; Kumar, Naresh                                                                               | 2009 |
| Effect of abutment screw surface treatment on reliability of implant-supported crowns.                                                                                                        | Anchieta, Rodolfo Bruniera; Machado, Lucas Silveira; Bonfante, Estevam Augusto; Hirata, Ronaldo; Freitas Jr, Amilcar Chagas; Coelho, Paulo G.                                              | 2014 |
| Finite Element Analysis of and Multiscale Skeletal Tissue Mechanics Concerning a Single Dental Implant Site                                                                                   | Sego, Timothy James                                                                                                                                                                        | 2016 |
| Surgery Phase Planning                                                                                                                                                                        | EMPOWERMENT, TOOLS OF                                                                                                                                                                      | 2008 |
| Application of Finite Element Analysis for Nanobiomedical Study                                                                                                                               | Wiwantitkit, Viroj                                                                                                                                                                         | 2012 |
| The bone growing chamber: a new model to investigate spontaneous and guided bone regeneration of artificial defects in the human jawbone.                                                     | Trisi, Paolo; Rao, Walter                                                                                                                                                                  | 1998 |
| Flow perfusion culture of marrow stromal osteoblasts in titanium fiber mesh                                                                                                                   | van den Dolder, Juliette; Bancroft, Gregory N.; Sikavitsas, Vassilios I.; Spauwen, Paul HM; Jansen, John A.; Mikos, Antonios G.                                                            | 2003 |
| Epidemiology and pathophysiology of coronary artery disease                                                                                                                                   | Yahagi, Kazuyuki; Kolodgie, Frank D.; Virmani, Renu                                                                                                                                        | 2017 |
| Peri-interventional endothelin-A receptor blockade improves long-term outcome in patients with ST-elevation acute myocardial infarction                                                       | Adlbrecht, Christopher; Wurm, Raphael; Humenberger, Michael; Andreas, Martin; Redwan, Bassam; Distelmaier, Klaus; Klappacher, Günter; Lang, Irene M.                                       | 2014 |
| Safety of transcranial magnetic stimulation in patients with implanted deep brain stimulators                                                                                                 | Kumar, Rajeev; Chen, Robert; Ashby, Peter                                                                                                                                                  | 1999 |
| Tissue Engineering in Ophthalmology: Implications for Eyelid Reconstruction                                                                                                                   | Sun, Michelle T.; O'connor, Andrea J.; Wood, John; Casson, Robert; Selva, Dinesh                                                                                                           | 2017 |
| Oestrogen replacement therapy and cardiovascular disease in post-menopausal women. A review                                                                                                   | Sitruk-Ware, R.; de Palacios, P. Ibarra                                                                                                                                                    | 1989 |
| Three-Dimensional Radiographic Imaging for Implant Positioning                                                                                                                                | Nattestad, Anders                                                                                                                                                                          | 2016 |
| The Affect of the Oral Microbiome in Health and Disease on the Uptake of HPV in Oral Keratinocyte Cells                                                                                       | Carmosino, Andrew J.                                                                                                                                                                       | 2015 |
| Inhibition of Orthopaedic Implant Infections by Immunomodulatory Effects of Host Defense Peptides                                                                                             | Greenfield, Edward                                                                                                                                                                         | 2014 |
| Physico/chemical characterization, in vitro, and in vivo evaluation of hydroxyapatite/PLGA composite and tricalcium phosphate particulate grafting materials                                  | Coimbra, Maria E.; Salles, Marcos B.; Yoshimoto, Marcelo; Allegrini Jr, Sergio; Fancio, Elizabeth; Higa, Olga; Suzuki, Marcelo; Coelho, Paulo G.                                           | 2009 |
| Drug treatments for prosthetic joint infections in the era of multidrug resistance                                                                                                            | Perez-Jorge, Concepcion; Gomez-Barrena, Enrique; Horcajada, Juan-Pablo; Puig-Verdie, Lluís; Esteban, Jaime                                                                                 | 2016 |
| Biomolecular Coating For Implants                                                                                                                                                             | García, Andrés J.; Reyes, Catherine D.; Petrie, Timothy; Schwartz, Zvi; Boyan, Barbara D.; Raynor, Jenny E.; Collard, David M.; Wojtowicz, Abigail M.; Guldberg, Robert E.                 | 2012 |
| CAMLOG Compendium: Surgery                                                                                                                                                                    | Kirsch, Axel                                                                                                                                                                               | 2007 |
| Complications in lateral window sinus elevation surgery                                                                                                                                       | Wallace, Stephen S.; Testori, Tiziano                                                                                                                                                      | 2010 |
| Esthetic Implant Dentistry: Diagnosis and Treatment Planning                                                                                                                                  | JIVRAJ, SAJ; RESHAD, MAMALY                                                                                                                                                                | 2017 |
| Surface-active biomaterials                                                                                                                                                                   | Hench, L. Larry; Wilson, June                                                                                                                                                              | 1984 |
| 32 Implantable Hearing Devices                                                                                                                                                                | Kuhn, Jeffery J.; Perez, Angel J.                                                                                                                                                          |      |
| Biomaterials for facial bone augmentation: comparative studies                                                                                                                                | Wilson, June; Merwin, G. E.                                                                                                                                                                | 1988 |
| Biomechanical testing of microblasted, acid-etched/microblasted, anodized, and discrete crystalline deposition surfaces: an experimental study in beagle dogs.                                | Bonfante, Estevam A.; Granato, Rodrigo; Marin, Charles; Jimbo, Ryo; Giro, Gabriela; Suzuki, Marcelo; Coelho, Paulo G.                                                                      | 2013 |
| Influence of maxillary sinus width on new bone formation after transcrestal sinus floor elevation: A proof-of-concept prospective cohort study                                                | Lombardi, Teresa; Stacchi, Claudio; Berton, Federico; Traini, Tonino; Torelli, Lucio; Di Lenarda, Roberto                                                                                  | 2017 |

|                                                                                                                                                                                          |                                                                                                                                                                                                      |      |
|------------------------------------------------------------------------------------------------------------------------------------------------------------------------------------------|------------------------------------------------------------------------------------------------------------------------------------------------------------------------------------------------------|------|
| Implant Strategies in Orthopedics                                                                                                                                                        | Koksai, Ismet                                                                                                                                                                                        | 2015 |
| Antibiotic Release from Calcium Phosphate Materials in Oral and Maxillofacial Surgery. Molecular, Cellular and Pharmaceutical Aspects                                                    | Manchon, Angel; C Prados-Frutos, Juan; Rueda-Rodriguez, Carmen; Salinas-Goodier, Carmen; H Alkhraisat, Mohammad; Rojo, Rosa; Rodriguez-Gonzalez, Arantza; Berlanga, Ana; Lopez-Cabarcos, Enrique     | 2017 |
| REVIEW Open Access                                                                                                                                                                       | Zhang, Lonnie Schneider Jianhua; Ning, Zhangchi; Lu, Cheng; Zhao, Siyu; Wang, Jianfen; Liu, Baoqin; Xu, Xuegong; Liu, Yuanyan                                                                        | 2018 |
| Biotransformation of silver released from nanoparticle coated titanium implants revealed in regenerating bone                                                                            | Geng, Hua; Poolagasundarampillai, Gowsihan; Todd, Naomi; Devlin-Mullin, Aine; Moore, Katie L.; Golrokhi, Zahra; Gilchrist, James B.; Jones, Eric; Potter, Richard J.; Sutcliffe, Chris               | 2017 |
| Micro-to Macroroughness of Additively Manufactured Titanium Implants in Terms of Coagulation and Contact Activation.                                                                     | Ek, Rebecca Klingvall; Hong, Jaan; Thor, Andreas; Bäckström, Mikael; Rännar, Lars-Erik                                                                                                               | 2017 |
| Combined vitrectomy and intravitreal dexamethasone (Ozurdex) sustained-release implant                                                                                                   | Zheng, Andrew; Chin, Eric K.; Almeida, David RP; Tsang, Stephen H.; Mahajan, Vinit B.                                                                                                                | 2016 |
| Induction of myofibroblastic differentiation in vitro by covalently immobilized transforming growth factor-β1                                                                            | Metzger, Wolfgang; Grenner, Nadine; Motsch, Sandra E.; Strehlow, Rother; Pöhlemann, Tim; Oberringer, Martin                                                                                          | 2007 |
| Complications after surgery for metastatic humeral lesions                                                                                                                               | Janssen, Stein J.; van Dijke, Maarten; Lozano-Calderón, Santiago A.; Ready, John E.; Raskin, Kevin A.; Ferrone, Marco L.; Hornicek, Francis J.; Schwab, Joseph H.                                    | 2016 |
| State of the union: a review of lumbar fusion indications and techniques for degenerative spine disease: JNSPG 75th Anniversary Invited Review Article                                   | Reid, Patrick C.; Morr, Simon; Kaiser, Michael G.                                                                                                                                                    | 2019 |
| A review of mathematical modelling in total hip replacement                                                                                                                              | Srimongkol, Sineenart                                                                                                                                                                                | 2012 |
| Fracture Resistance of Straight and Angulated Zirconia Implant Abutments Supporting Anterior Three-Unit Lithium Disilicate Fixed Dental Prostheses.                                      | Saker, Samah; El-Shahat, Sameh; Ghazy, Mohamed                                                                                                                                                       | 2016 |
| The influence of implant body and thread design of mini dental implants on the loading of surrounding bone: a finite element analysis                                                    | Toth, Arpad; Hasan, Istabrak; Bourauel, Christoph; Mundt, Torsten; Biffar, Reiner; Heinemann, Friedhelm                                                                                              | 2017 |
| Influence of finish line in the distribution of stress trough an all ceramic implant-supported crown. A 3D finite element analysis                                                       | Sonnino, G.; Gloria, F.; Ottria, Liliana; Barlattani, Alberto                                                                                                                                        | 2009 |
| Regenerative Dentistry Using Stem Cells and Nanotechnology                                                                                                                               | Mitsiadis, Thimios A.; Orsini, Giovanna                                                                                                                                                              | 2017 |
| Biologic effects of surface roughness and fluorhydroxyapatite coating on osteointegration in external fixation systems: an in vivo experimental study                                    | Savarino, L.; Fini, M.; Ciapetti, G.; Cenni, E.; Granchi, D.; Baldini, N.; Greco, M.; Rizzi, G.; Giardino, R.; Giunti, A.                                                                            | 2003 |
| SurFACTS in Biomaterials                                                                                                                                                                 | McGonigle, Joe; Joslin, Jessica M.; Damodaran, Vinod B.; Reynolds, Melissa M.; Salvati, Lawrence; Fairman, Colin; Property, SurFACTS Intellectual; Aparicio, Conrado; Triolo, Phil; Fleming, Wendy   | 2012 |
| Adaptive immune response inhibits ectopic mature bone formation induced by BMSCs/BCP/plasma composite in immune-competent mice                                                           | Bouvet-Gerbetaz, Sébastien; Boukhechba, Florian; Balaguer, Thierry; Schmid-Antomarchi, Heidy; Michiels, Jean-François; Scimeca, Jean-Claude; Rochet, Nathalie                                        | 2014 |
| Dental Research                                                                                                                                                                          | Fang, W. E. I.; David, T. W.; Xing, LONG; LASSILA, Lippo VJ; NAGAS, Emre; VALLITTU, Pekka K.; GAROUSHI, Sufyan; Ruo Xi, D. U.; Yi Ming, L. I.; Jian Feng, M. A.                                      | 2012 |
| Removal Torque Values of Titanium Implants in the Maxilla of Miniature Pigs                                                                                                              | Nolte, Lutz-Peter                                                                                                                                                                                    | 2000 |
| Historical Perspectives on Biomedical Coatings in Medical Devices                                                                                                                        | Hendriks, M.; Cahalan, P. T.                                                                                                                                                                         | 2016 |
| New dimensions in tooth implant and transplantation                                                                                                                                      | Anssari Moin, D.                                                                                                                                                                                     | 2018 |
| The potential of tissue engineering and regeneration for craniofacial bone                                                                                                               | Yamano, Seiichi; Haku, K.; Ishioka, M.; Lin, T. Y.; Hanatani, S.; Dai, J.; Moursi, A. M.                                                                                                             | 2012 |
| Temporomandibular joint total joint replacement—TMJ TJR                                                                                                                                  | Mercuri, Louis G.                                                                                                                                                                                    | 2016 |
| Finite element modelling and simulations in dentistry: a bibliography 1990–2003                                                                                                          | Mackerle, Jaroslav                                                                                                                                                                                   | 2004 |
| A Comparative Study on the Effect of Integrin Subunits Beta One and Beta Three on Osteoblast Implant Interactions                                                                        | Duqum, Ibrahim                                                                                                                                                                                       | 2017 |
| Impact of metabolic bone disease on craniofacial bones and teeth                                                                                                                         | Bashutski, Jill; Taichman, L. Susan; McCauley, Laurie K.                                                                                                                                             | 2012 |
| targeted preventive and not resistant-strain-producing                                                                                                                                   | Beachey, E. H.; Bullen, J. J.; Rogers, H. J.; Griffiths, E.                                                                                                                                          | 1996 |
| Adhesion to biomaterials                                                                                                                                                                 | Mittelman, MARC W.                                                                                                                                                                                   | 1996 |
| Biomechanical techniques for pre-clinical testing of prostheses and implants                                                                                                             | Prendergast, Patrick J.                                                                                                                                                                              | 2001 |
| The story of Bioglass®                                                                                                                                                                   | Hench, Larry L.                                                                                                                                                                                      | 2006 |
| Ceramic-poly lactide composite material used in a model of healing of osseous defects in rabbits                                                                                         | Myciński, Paweł; Zarzecka, Joanna; Skórska-Stania, Agnieszka; Jelonek, Agnieszka; Okoń, Krzysztof; Wróbel, Maria                                                                                     | 2017 |
| Influence of periodontal biotype on buccal bone remodeling after tooth extraction using the flapless approach with a xenograft: A histomorphometric and fluorescence study in small dogs | Maia, Luciana Prado; Reino, Danilo Maeda; Novaes Jr, Arthur Belém; Muglia, Valdir Antonio; Taba Jr, Mário; de Morais Grisi, Márcio Fernando; de Souza, Sérgio Luís Scombatti; Palioto, Daniela Bazan | 2015 |



|                                                                                                                                                                                                                                                        |                                                                                                                                                                                                                      |      |
|--------------------------------------------------------------------------------------------------------------------------------------------------------------------------------------------------------------------------------------------------------|----------------------------------------------------------------------------------------------------------------------------------------------------------------------------------------------------------------------|------|
| Alendronate release from calcium phosphate cement for bone regeneration in osteoporotic conditions                                                                                                                                                     | van Houdt, Claire IA; Gabbai-Armelin, Paulo R.; Lopez-Perez, Paula M.; Ulrich, Dietmar JO; Jansen, John A.; Renno, Ana Claudia M.; van den Beucken, Jeroen JJP                                                       | 2018 |
| The numerical analysis of 4-On-Pillars technique using meshless methods                                                                                                                                                                                | Vargas, K. F.; Caldas, G. A. R.; Belinha, J.; Jorge, RM Natal; Hernandez, P. A. G.; Ozkomur, A.; Smidt, R.; Naconeey, M. M.; Schneider, L. E.                                                                        | 2019 |
| Impact of Surface Chemistry Modifications on Speed and Strength of Osseointegration.                                                                                                                                                                   | Kang, Hyeon-Goo; Jeong, Yong-Soo; Huh, Yoon-Hyuk; Park, Chan-Jin; Cho, Lee-Ra                                                                                                                                        | 2018 |
| Computed tomographic evaluation of alterations of the buccolingual width of the alveolar ridge after immediate implant placement associated with the use of a synthetic bone substitute.                                                               | Assaf, Jamal Hassan; Zanatta, Fabricio Batistin; de Brito Jr, Rui Barbosa; Gomes França, Fabiana Mantovani                                                                                                           | 2013 |
| Biofilm associated microorganisms on removable oral orthodontic appliances in children in the mixed dentition                                                                                                                                          | Pathak, A. K.; Sharma, D. S.                                                                                                                                                                                         | 2013 |
| ALVEOLAR RIDGE PRESERVATION AND REGENERATION WITH BIOMATERIALS                                                                                                                                                                                         | de Souza, Sérgio Luis Scombatti; Martins, Sérgio Henrique Lago; Bezerra, Fábio José Barbosa; Shibli, Jamil Awad; Mantovani, Rafael Verleigia; da Costa, Leandro Fabiano Alves; Júnior, José Augusto Barbanti Gabarra | 2015 |
| Polymeric drug delivery systems for localized cancer chemotherapy                                                                                                                                                                                      | De Souza, Raquel; Zahedi, Payam; Allen, Christine J.; Piquette-Miller, Micheline                                                                                                                                     | 2010 |
| Medical biofilms—nanotechnology approaches                                                                                                                                                                                                             | Neethirajan, Suresh; Clond, Morgan A.; Vogt, Adam                                                                                                                                                                    | 2014 |
| Use of biologic agents to promote bone formation in implant dentistry: A critical assessment of systematic reviews                                                                                                                                     | Alarcón, Marco Antonio; Diaz, Karla Tatiana; Aranda, Luisiana; Cafferata, Emilio Alfredo; Faggion Jr, Clovis Mariano; Monje, Alberto                                                                                 | 2017 |
| Craig's restorative dental materials-e-book                                                                                                                                                                                                            | Sakaguchi, Ronald L.; Powers, John M.                                                                                                                                                                                | 2012 |
| Surgical strategies for high-energy fractures in patients with osteoporosis.                                                                                                                                                                           | Lepri, Andrea Cozzi; Capone, Antonio; Del Prete, Armando; Soderi, Stefano; Muncibi, Francesco; Innocenti, Massimo                                                                                                    | 2018 |
| Quad Zygoma                                                                                                                                                                                                                                            | Davó, Rubén; DOMFS, FRCDC                                                                                                                                                                                            | 2019 |
| Will There be a Role for Disc Prostheses in Small Animals?                                                                                                                                                                                             | Adamo, Filippo; Forterre, Franck                                                                                                                                                                                     | 2015 |
| Corrosion of Metallic Implants                                                                                                                                                                                                                         | Hallab, Nadim James; Jacobs, Joshua J.; Gilbert, Jeremy L.                                                                                                                                                           | 2005 |
| Intoxicated by Implants?                                                                                                                                                                                                                               | Helsen, Jozef A.; Missirlis, Yannis                                                                                                                                                                                  | 2010 |
| Biocompatibility, Metal Ions, and Corrosion Products                                                                                                                                                                                                   | Tkaczyk, Cathy; Tabrizian, Maryam                                                                                                                                                                                    | 2012 |
| TOWARDS THE OPTIMUM SPINAL FUSION DEVICE                                                                                                                                                                                                               | MEDVRETE, V. ISKANJU OPTIMALNEGA UMETNEGA; VSADKA, NEGA                                                                                                                                                              | 2018 |
| 2: Metal Surfaces in Medicine: Current Knowledge of Properties, Modeling and Biological Response                                                                                                                                                       | Artini, Cristina                                                                                                                                                                                                     | 2017 |
| FORM, Frankfurt Oral Regenerative Medicine, Clinic for Maxillofacial and Plastic Surgery, Johann Wolfgang Goethe University, Frankfurt, Germany                                                                                                        | Ghanaati, Shahram; Al-Maawi, Sarah                                                                                                                                                                                   | 2018 |
| Finite Element Analysis of Uncemented Total Hip Replacement: The effect of bone-implant interface                                                                                                                                                      | Ismail, Nur Faiqa; Shuib, Solehuddin; Yahaya, Muhd Azman; Romli, Ahmad Zafir; Shokri, Amran Ahmed                                                                                                                    | 2016 |
| A Critical Review of Contemporary Clinical Treatment                                                                                                                                                                                                   | Nevens, Myron                                                                                                                                                                                                        | 2007 |
| 1Laboratory of Ecology and Ecotechnology, School of Biosciences, Mahatma Gandhi University, Kottayam, Kerala, India, 2International and Inter University Centre for Nanoscience and Nanotechnology, Mahatma Gandhi University, Kottayam, Kerala, India | Soman, Soumya; Ajitha, A. R.                                                                                                                                                                                         | 2018 |
| Nanobiotechnology perspectives on prevention and treatment of orthopaedic implant associated infection                                                                                                                                                 | Borse, Vivek; Pawar, Vaishali; Shetty, Gautam; Mullaji, Arun; Srivastava, Rohit                                                                                                                                      | 2016 |
| Biomimetic hydroxyapatite coated titanium screws demonstrate rapid implant stabilization and safe removal in-vivo                                                                                                                                      | Sörensen, Jan Henrik; Dürselen, Lutz; Welch, Ken; Sörensen, Torben Christian; Procter, Philip; Engqvist, H/a akan; Strømme, Maria; Ignatius, Anita; Steckel, Hartwig                                                 | 2015 |
| The effect of seprafilm and interceed on capsule formation around silicone discs in a rat model                                                                                                                                                        | Friedman, H. I.; Stonerock, C.; Lefavre, J. F.; Yost, M.                                                                                                                                                             | 2004 |
| Dental implant treatment planning: improvement in clinical and radiological diagnosis                                                                                                                                                                  | Kubilius, Marius                                                                                                                                                                                                     |      |
| Methodological Consideration of Various Intraosseus and Heterotopic Bone Grafts Implantation in Animal Models                                                                                                                                          | Xu, W.; Spilker, G.; Weinand, C.                                                                                                                                                                                     | 2015 |
| Histologic evaluation of new bone in post-extraction sockets induced by melatonin and apigenin: an experimental study in American fox hound dogs                                                                                                       | Calvo Guirado, José Luis; López, López; Jara, Patricia; Fernández Domínguez, Manuel; Prados Frutos, Juan Carlos; Gehrke, Sergio Alexandre                                                                            | 2016 |
| Current knowledge and future perspectives of bone replacement grafts                                                                                                                                                                                   | Kassir, Abdel Rahman; Chakar, Carole                                                                                                                                                                                 | 2018 |
| Design of artificial human joints & organs                                                                                                                                                                                                             | Pal, Subrata                                                                                                                                                                                                         | 2014 |
| MiniTHR for Young Adult Hip Disease 24                                                                                                                                                                                                                 | Santori, N.; Potestio, D.; Santori, F. S.                                                                                                                                                                            | 2013 |
| Oral fungal-bacterial biofilm models in vitro                                                                                                                                                                                                          | VITROME, IHU; Côte, d'Azur                                                                                                                                                                                           | 2017 |
| A review of the surface modifications of titanium alloys for biomedical applications                                                                                                                                                                   | UPORABO, BIOMEDICINSKO                                                                                                                                                                                               | 2017 |
| Assessment of the symmetry of bone strains in the proximal femoral medial cortex under load in bilateral pairs of cadaver femurs                                                                                                                       | Sedlacek, R. C.; O'Connor, D. O.; Lozynsky, A. J.; Harris, W. H.                                                                                                                                                     | 1997 |

|                                                                                                                                                                            |                                                                                                                                                                             |      |
|----------------------------------------------------------------------------------------------------------------------------------------------------------------------------|-----------------------------------------------------------------------------------------------------------------------------------------------------------------------------|------|
| In vitro phenotypic differentiation towards commensal and pathogenic oral biofilms                                                                                         | Janus, Marleen M.; Keijser, Bart JF; Bikker, Floris J.; Exterkate, Rob AM; Crielgaard, Wim; Krom, Bastiaan P.                                                               | 2015 |
| Wear behavior of oxidized Ti-48Al-2Cr-2Nb (at.%), Ti-6Al-4V and Cp-Ti under dry and lubricated conditions                                                                  | Ramos-Saenz, Carlos R.; Sundaram, Paul A.                                                                                                                                   |      |
| cruciate ligament reconstruction                                                                                                                                           | Field, J. R.; Adachi, N.                                                                                                                                                    |      |
| Fractionation and characterization of particles simulating wear of total joint replacement (TJR) following ASTM standards                                                  | Musib, Mrinal K.; Saha, Subrata                                                                                                                                             | 2011 |
| Prosthetic Joint Infection due to Burkholderia cenocepacia: An Opportunistic Pathogen with an Expanding Spectrum of Disease.                                               | Sebastian, Sujeesh; Malhotra, Rajesh; Das, Rojaleen; Kapil, Arti; Dhawan, Benu                                                                                              | 2017 |
| Bioactive peptide-modified biomaterials for bone regeneration                                                                                                              | Lee, Jue-Yeon; Choi, Young-Suk; Lee, Seung-Jin; Chung, Chong-Pyoung; Park, Yoon-Jeong                                                                                       | 2011 |
| Bioceramics—An introductory overview                                                                                                                                       | Shanmugam, K.; Sahadevan, R.                                                                                                                                                | 2018 |
| Implantable Auditory Devices, an Issue of Otolaryngologic Clinics of North America E-Book                                                                                  | Kohan, Darius; Chandrasekhar, Sujana S.                                                                                                                                     | 2019 |
| Effect of surface modification of zirconia on cell adhesion, metabolic activity and proliferation of human osteoblasts                                                     | Al Qahtani, Waleed MS; Schille, Christine; Spintzyk, Sebastian; Al Qahtani, Mohammed SA; Engel, Eva; Geis-Gerstorfer, Juergen; Rupp, Frank; Scheideler, Lutz                | 2017 |
| Wolfgang Lehmann, Martin Rupprecht, Jacob Nuechtern, Daniel Melzner, Kai Sellenschloh, Jan Kolb, Florian Fensky                                                            | Hoffmann, Michael                                                                                                                                                           | 2012 |
| Adhesion and Proliferation of Human Adipose-Derived Stem Cells on Titania Nanotube Surfaces                                                                                | Cowden, Kari; Dias-Netipanyj, Marcela Ferreira; Popat, Ketul C.                                                                                                             | 2019 |
| Mechanisms how implant-associated blood clots could affect wound healing responses                                                                                         | Burkhardt, Melanie A.                                                                                                                                                       | 2015 |
| Incidence and risk factors for infection when teicoplanin is included for prophylaxis in patients with hip fracture                                                        | Capdevila, Aina; Navarro, Margarita; Bori, Guillem; Tornero, Eduard; Camacho, Pilar; Bosch, Jordi; García, Sebastián; Mensa, Josep; Soriano, Alex                           | 2016 |
| The influence of leukocyte and platelet concentrate enrich in stem cells on bone regeneration processes: a clinical and flow cytometry study                               | Bielecki, Tomasz; Wójcik, Krzysztof; Bold, Tadeusz; Osadnik, Bartłomiej; Szczepański, Tomasz                                                                                | 2015 |
| Bone Augmentation Techniques for Horizontal and Deficiency Vertical in Alveolar Oral Implantology Ridge                                                                    | Tolstunov, Len; Hamrick, John F. Eric                                                                                                                                       | 2019 |
| Uncemented hip arthroplasty in primary and revision surgery: patterns of bone remodelling and options to influence periprosthetic bone loss                                | Salemyr, Mats                                                                                                                                                               | 2013 |
| Annuloplasty for valve repair with a new biodegradable ring: an experimental study                                                                                         | Kalangos, Afksendiyos; Sierra, Jorge; Vala, Dominique; Cikirikcioglu, Mustafa; Walpoth, Beat; Orrit, Xavier; Pomar, José; Mestres, Carlos; Albanese, Sonia; Jhurry, Dhanjay | 2006 |
| Biocompatibility of anionic collagen matrices and its influence on the orientation of cellular growth.                                                                     | Buchaim, Rogério L.; Goissis, Gilberto; Andreo, Jesus Carlos; Roque, Domingos D.; Roque, José S.; Buchaim, Daniela V.; Rodrigues, Antonio C.                                | 2007 |
| Treatment of a bone defect consequent to the removal of a periapical cyst with equine bone and equine membranes: clinical and histological outcome                         | Di Stefano, D. A.; Andreasi Bassi, M.; Cinci, L.; Pieri, L.; Ammirabile, G.                                                                                                 | 2012 |
| Response to metallic implants                                                                                                                                              | Wapner, Keith L.                                                                                                                                                            | 1990 |
| Advanced Coating Nanomaterials for Drug Release Applications                                                                                                               | Scilletta, Natalia A.; Municoy, Sofia; Bellino, Martín G.; Soler-Illia, Galo JAA; Desimone, Martín F.; Catalano, Paolo N.                                                   | 2019 |
| Tightening of healing abutments: influence of torque on bacterial proliferation risk, an in vitro investigation                                                            | Bousquet, Philippe; Bennasar, Isabelle Calas; Tramini, Paul; Jacquemot, Maxime; Cuisinier, Frédéric                                                                         | 2014 |
| Implant Associated Infection: Victorious Germs or Avoidable Complication?                                                                                                  | Gehrke, Thorsten                                                                                                                                                            |      |
| New telescopic crown protocol for partially edentulous patients: report of 32 cases.                                                                                       | Longoni, Salvatore; Apruzzese, Domenico; Careddu, Giovanni; Sartori, Matteo; Davide, Roberto                                                                                | 2005 |
| Tanshinone IIA protects against polyethylene particle-induced osteolysis response in a mouse calvarial model                                                               | Yao, Jun; Ma, Shiting; Feng, Wenyu; Wei, Yan; Lu, Huiping; Zhong, Gang; Wu, Zhengyuan; Wang, Hongtao; Su, Wei; Li, Jia                                                      | 2018 |
| Cooperative catechol-functionalized polypeptide (o) ide brushes and nanoparticles for combination of protein resistance and antimicrobial activity on metal oxide surfaces | Yoo, Jin; Birke, Alexander; Kim, Joonwon; Jang, Yeongseon; Song, Seuk Young; Ryu, Seungmi; Kim, Byung-Soo; Kim, Byung-Gee; Barz, Matthias; Char, Kookheon                   | 2018 |
| Reduction of Inflammatory Reaction of Poly (D, L-Lactic-C o-Glycolic Acid) Using Demineralized Bone Particles                                                              | Yoon, Sun Jung; Kim, Soon Hee; Ha, Hyun Jung; Ko, Youn Kyung; So, Jung Won; Kim, Moon Suk; Yang, Young Il; Khang, Gilson; Rhee, John M.; Lee, Hai Bang                      | 2008 |
| In vivo and in vitro assessment of the biocompatibility and degradation of high-purity Mg anastomotic staples                                                              | Qu, Su; Xia, Jiazeng; Yan, Jun; Wu, Hongliu; Wang, Hao; Yi, Yi; Zhang, Xiaonong; Zhang, Shaoxiang; Zhao, ChangLi; Chen, Yigang                                              | 2017 |
| Bioengineering, blood flow and stem cells                                                                                                                                  | Kirkpatrick, C. J.                                                                                                                                                          | 2004 |
| The Wound-Healing Process                                                                                                                                                  | Price, Albert                                                                                                                                                               | 2007 |
| Cochlear and auditory brainstem implantation                                                                                                                               | Wackym, P. Ashley; Runge-Samuelson, Christina L.                                                                                                                            | 2003 |
| Digital image analysis for morphometric evaluation of tissue response after implanting alloplastic vascular prostheses                                                     | Zippel, Roland; Hoene, Andreas; Walschus, Uwe; Jarchow, Raymond; Ueberrueck, Torsten; Patrzyk, Maciej; Schlosser, Michael; Wilhelm, Lutz                                    | 2006 |
| Kumari†, Ethirajulu Radha*, Narayanan Vanisri*, Soundarajan Aisverya*, Sukumarn Anil†* DKM College for Women, Vellore, India,† Tagore Engineering College, Chennai, India  | Sudha, Parappurath N.; Sangeetha, Kirubanandam; Jisha, Arumugam V.                                                                                                          | 2018 |
| 10 Anterior Lumbar Interbody Fusion                                                                                                                                        | Sasso, Rick C.; Reichard, A. Kirk; Shah, Shenil                                                                                                                             |      |

|                                                                                                                                                                                        |                                                                                                                                                                      |      |
|----------------------------------------------------------------------------------------------------------------------------------------------------------------------------------------|----------------------------------------------------------------------------------------------------------------------------------------------------------------------|------|
| Mechanisms of disease: the human N-glycome                                                                                                                                             | Lauc, Gordan; Pezer, Marija; Rudan, Igor; Campbell, Harry                                                                                                            | 2016 |
| Surface Functionalization of Biomaterials                                                                                                                                              | Kyzioł, Karol; Kaczmarek, \Lukasz; Kyzioł, Agnieszka                                                                                                                 | 2017 |
| Porous metals and metallic foams in orthopedic applications                                                                                                                            | Lefebvre, L. P.                                                                                                                                                      | 2013 |
| New biomaterials for orthopedic implants                                                                                                                                               | Ong, Kevin L.; Yun, Brian Min; White, Joshua B.                                                                                                                      | 2015 |
| Jeetesh Gawande1, Sanjay Upadhyay1                                                                                                                                                     | Upadhyay, Sanjay                                                                                                                                                     | 2018 |
| Aseptic Loosening of Total Hip Replacements-Acetabulum                                                                                                                                 | Gollwitzer, Hans; von Eisenhart-Rothe, Rüdiger; Gradinger, Reiner                                                                                                    | 2014 |
| Maxillofac. Surg. 2012; xxx: xxx-xxx.\copyright 2012 International Association of Oral and Maxillofacial Surgeons. Published by Elsevier Ltd. All rights reserved.                     | Ishak, M. I.; Kadir, MR Abdul; Sulaiman, E.; Kasim, NH Abu                                                                                                           |      |
| The promotion of antibacterial effects of ti6al4v alloy modified with TiO 2 nanotubes using a superoxidized solution                                                                   | Beltrán-Partida, Ernesto; Valdez-Salas, Benjamin; Escamilla, Alan; Moreno-Ulloa, Aldo; Burtseva, Larysa; Valdez-Salas, Ernesto; Alvarez, Mario Curiel; Nedev, Nicola | 2015 |
| Biocompatibility of materials                                                                                                                                                          | Xiang, Zhou; Spector, Myron                                                                                                                                          | 2006 |
| Osteotome-mediated sinus floor elevation: a systematic review and meta-analysis.                                                                                                       | Călin, Claudiu; Petre, Alexandru; Drafta, Sergiu                                                                                                                     | 2014 |
| The Contribution of Periodontics to Orthodontic Therapy                                                                                                                                | Orthodontics, Periodontally Accelerated Osteogenic                                                                                                                   |      |
| 9.1 Antibacterial Coating of Implants in Orthopaedics and Trauma-313                                                                                                                   | Romanò, Carlo Luca; Morelli, Ilaria; Drago, Lorenzo; Gallazzi, Enrico; Scarponi, Sara                                                                                | 2017 |
| Impact of Overlapping on 1-Year Clinical Outcomes in Patients Undergoing Everolimus-Eluting Bioresorbable Scaffolds Implantation in Routine Clinical Practice                          | i Sunyer, August Pi                                                                                                                                                  |      |
| The influence of the alveolar ridge shape on the stress distribution in a free-end saddle removable partial denture supported by implant                                               | Junior, Manoel M.; Anchieta, Rodolfo B.; Rocha, Eduardo P.; Pereira, Joao A.; Archangelo, Carlos M.; Freitas-Junior, Amilcar C.; Almeida, Erika O.                   | 2011 |
| GF109203X attenuates RANKL-induced osteoclastogenesis and suppresses osteolysis in a mouse model                                                                                       | Xie, Dawang; Yao, Jun; Feng, Wenyu; Wei, Yan; Lu, Huiping; Li, Jia; Wei, Qingjun                                                                                     | 2017 |
| Biomechanics of artificial disc                                                                                                                                                        | Goel, V.; Dooris, Andrew P.; Dennis, M.; Rengachary, S.                                                                                                              | 2003 |
| CeraNews                                                                                                                                                                               | Parvizi, Javad; Thomas, Peter; Summer, Burkhard; Krenn, Veit                                                                                                         |      |
| Lateral alveolar ridge augmentation using tenting screws, acellular dermal matrix, and freeze-dried bone allograft alone or with particulate autogenous bone.                          | Caldwell, Gregory R.; Mills, Michael P.; Finlayson, Richard; Mealey, Brian L.                                                                                        | 2015 |
| Response of cortical bone to local controlled release of sodium fluoride: the effect of implant insertion site                                                                         | Anderson, Paul A.; Copenhaver, James C.; Tencer, Allan F.; Clark, John M.                                                                                            | 1991 |
| Induction of leukocyte activation by meshes surgically implanted in the peritoneal cavity                                                                                              | Devereux, Dennis F.; O'Connell, Sean M.; Liesch, Janice B.; Weinstein, Melvin; Robertson, Fredika M.                                                                 | 1991 |
| Titanium nanotube arrays as interfaces for blood-contacting implantable devices: a study evaluating the nanotopography-associated activation and expression of blood plasma components | Smith, Barbara S.; Popat, Ketul C.                                                                                                                                   | 2012 |
| Biological Coatings for Implant Surface Modification                                                                                                                                   | Xie, Youtao; Li, Kai; Zheng, Xuebin                                                                                                                                  |      |
| Progress in the Prevention and Treatment of Bacterial Biofilm [J]                                                                                                                      | DING, Jin-ya; HUANG, Qian-chuan; CAO, Jun-hao                                                                                                                        | 2011 |
| Efficacy and safety of anti-TNF therapy for inflammatory bowel disease (IBD) in liver transplant recipients for primary sclerosing cholangitis (PSC): a multicenter experience.        | Ryska, O.; Serclova, Z.; Mestak, O.; Matouskova, E.; Vesely, P.; Mrazova, I.                                                                                         |      |
| Titanium dioxide nanoparticles and nanotubular surfaces: potential applications in nanomedicine                                                                                        | Ribeiro, Ana Rosa; Gemini-Piperni, Sara; Alves, Sofia Afonso; Granjeiro, José Mauro; Rocha, Luís Augusto                                                             | 2017 |
| Management of Complications of Alveolar Distraction Osteogenesis Procedure                                                                                                             | Drew, Stephanie J.                                                                                                                                                   | 2016 |
| Video-Assisted ALIF with Cage                                                                                                                                                          | Aunoble, S.; Hoste, D.; Bley, B.; Basso, Y.; Villet, L.; Liquois, F.                                                                                                 | 2006 |
| Possible Role of Microcrystallinity on Surface Properties of Titanium Surfaces for Biomedical Application                                                                              | Mussano, Federico; Genova, Tullio; Guastella, Salvatore; Faga, Maria Giulia; Carossa, Stefano                                                                        | 2016 |
| Evaluation of cartilage repair tissue after biomaterial implantation in rat patella by using T2 mapping                                                                                | Watrín-Pinzano, A.; Ruaud, J.-P.; Cheli, Y.; Gonord, P.; Grossin, L.; Bettembourg-Brault, I.; Gillet, P.; Payan, E.; Guillot, G.; Netter, P.                         | 2004 |
| Electrophoretic-deposited novel ternary silk fibroin/graphene oxide/hydroxyapatite nanocomposite coatings on titanium substrate for orthopedic applications                            | Li, Ming; Xiong, Pan; Mo, Maosong; Cheng, Yan; Zheng, Yufeng                                                                                                         | 2016 |
| 3.1 General introduction and chapter overview                                                                                                                                          | Mas-Moruno, C.                                                                                                                                                       | 2017 |
| Effects of a calcium phosphate-coated and anodized titanium surface on early bone response                                                                                             | Koh, Jung-Woo; Kim, Young-Sung; Yang, Jae-Ho; Yeo, In-Sung                                                                                                           | 2013 |
| Entamoeba gingivalis key aggressive predator in periodontal disease                                                                                                                    | Bonner, M.                                                                                                                                                           | 2015 |
| Elevated prostate specific antigen (PSA) levels a risk factor for pathological hip fracture in metastatic prostatic carcinoma                                                          | Thornes, B.; O'Malley, P.; O'Brien, M.; McCabe, J.; O'Sullivan, M.; Curtin, W.                                                                                       | 2002 |
| Cervical motion segment replacement                                                                                                                                                    | Bryan, Vincent E.                                                                                                                                                    | 2004 |
| Can Osseointegration Be Achieved Without Primary Stability?                                                                                                                            | Khabbaz, Yasser                                                                                                                                                      | 2019 |

|                                                                                                                                               |                                                                                                                                                                                          |      |
|-----------------------------------------------------------------------------------------------------------------------------------------------|------------------------------------------------------------------------------------------------------------------------------------------------------------------------------------------|------|
| Surface modification of metallic biomaterials for better tribological properties: A review                                                    | Uwais, Zahid A.; Hussein, Mohamed A.; Samad, M. Abdul; Al-Aqeeli, Naser                                                                                                                  | 2017 |
| 正畸微种植体周围炎对骨结合界面影响的研究                                                                                                                          | 胡赟; 郑雷蕾; 唐甜; 赵志河; 宋锦磷; 邓锋                                                                                                                                                                | 2011 |
| Evaluation of the association of sinus mucosal thickening with dental and periodontal status using cone beam computed tomographic imaging     | Shahidi, Shoaleh; Zamiri, Barbod; Panahi, Roghayeh                                                                                                                                       | 2016 |
| Surface Characterization Techniques Used for Dentistry                                                                                        | Rashid, Haroon                                                                                                                                                                           | 2017 |
| Prevention of tissue calcification on bioprosthetic heart valve by using epoxy compounds: a study of calcification tests in vitro and in vivo | Tingfei, Xi; Jiazhen, Ma; Wenhua, Tian; Xuehui, Lei; Shuhui, Long; Baoshu, Xi                                                                                                            | 1992 |
| Engineering biocompatible implant surfaces. Part II: cellular recognition of biomaterial surfaces: lessons from cell-matrix interactions      | Von Der Mark, Klaus; Park, Jung                                                                                                                                                          | 2013 |
| Tailored Biomaterials for Therapeutic Strategies Applied in Periodontal Tissue Engineering                                                    | Seciu, Ana-Maria; Craciunescu, Oana; Stanciuc, Ana-Maria; Zarnescu, Otilia                                                                                                               | 2019 |
| Detectability of normal anatomy in digital panoramic radiographs                                                                              | Gross, Heidi; Nilsson, Mats; Hellén-Halme, Kristina                                                                                                                                      | 2014 |
| Effects of Ultraviolet Photofunctionalization on Bone Augmentation and Integration Capabilities of Titanium Mesh and Implants.                | Hirota, Makoto; Ikeda, Takayuki; Tabuchi, Masako; Ozawa, Tomomichi; Tohnai, Iwai; Ogawa, Takahiro                                                                                        | 2017 |
| In vivo degradation of magnesium alloy LA63 scaffolds for temporary stabilization of biological myocardial grafts in a swine model            | Schilling, Tobias; Brandes, Gudrun; Tudorache, Igor; Cebotari, Serghei; Hilfiker, Andres; Meyer, Tanja; Biskup, Christian; Bauer, Michael; Waldmann, Karl-Heinz; Bach, Friedrich-Wilhelm | 2013 |
| Alexandra Roman, Cosmin Cioban, Stefan-Ioan Stratul, Frank Schwarz, Aurel Muste, Stefan-Adrian Petrutu                                        | Zaganescu, Raluca                                                                                                                                                                        |      |
| 106 Section III: Disease-Specific Considerations                                                                                              | Shoulder, RCDA                                                                                                                                                                           | 2005 |
| Dependence of neovascularization mechanisms on the molecular microenvironment                                                                 | Popa, Eliane R.; Van Der Strate, Barry WA; Brouwer, Linda A.; Tadema, Henko; Schipper, Martin; Fernandes, Brian; Hendriks, Marc; Van Luyn, Marja JA; Harmsen, Martin C.                  | 2007 |
| 18 The Titanium-Bone Interface In Vivo                                                                                                        | Larsson, Cecilia; Esposito, Marco; Liao, Haihong; Thomsen, Peter                                                                                                                         |      |
| Percutaneous coronary intervention of single-or multi-vessel disease                                                                          | Buchanan, Gill Louise                                                                                                                                                                    | 2017 |
| Maxillary Sinus in relation to Modern Oral and Maxillofacial Surgery                                                                          | Corbella, Stefano                                                                                                                                                                        |      |
| Numerical investigation of complete mandibular dentures stabilized by conventional or mini implants in patient individual models              | Lohmann, Anna; Keilig, Ludger; Heinemann, Friedhelm; Bourauel, Christoph; Hasan, Istabrak                                                                                                | 2019 |
| Effect of Local Puerarin Administration on Xenograft Lokal Puerarin Uygulamasının Hayvansal Kemik Grefti Üzerine Etkisi                       | Türer, Akif; Türer, Çiğdem Coşkun; Önger, Mehmet Emin                                                                                                                                    |      |
| Biological performance of a new $\beta$ -TCP/PLLA composite material for applications in spine surgery: In vitro and in vivo studies          | Aunoble, Stephane; Clément, Denis; Frayssinet, Patrick; Harmand, Marie Francois; Le Huec, Jean Charles                                                                                   | 2006 |
| Surface modification and drug delivery for biointegration                                                                                     | Jeong, Kyung Jae; Kohane, Daniel S.                                                                                                                                                      | 2011 |
| 16S rDNA analysis of periodontal plaque in chronic obstructive pulmonary disease and periodontitis patients                                   | Wu, Xingwen; Chen, Jiazhen; Xu, Meng; Zhu, Danting; Wang, Xuyang; Chen, Yulin; Wu, Jing; Cui, Chenghao; Zhang, Wenhong; Yu, Liying                                                       | 2017 |
| Healing of canine articular cartilage defects treated with microfracture, a type-II collagen matrix, or cultured autologous chondrocytes      | Breinan, Howard A.; Martin, Scott D.; Hsu, Hu-Ping; Spector, Myron                                                                                                                       | 2000 |
| Zeeshan Sheikh1, 2, 3, Nader Hamdan4, Mohamed-Nur Abdallah1                                                                                   | Glogauer, Michael; Grynpan, Marc                                                                                                                                                         | 2019 |
| 1D Titania Nanoarchitecture as Bioactive and Photoactive Coatings for Modern Implants: A Review                                               | Radtke, Aleksandra                                                                                                                                                                       | 2017 |
| Tissue reaction to prosthetic materials                                                                                                       | Ravi, Nathan; Aliyar, Hyder Ali                                                                                                                                                          | 2006 |
| Factores pronósticos en implantología oral                                                                                                    | Manzano Martínez, Guillermo                                                                                                                                                              |      |
| Investigational drugs for fracture healing: preclinical & clinical data                                                                       | E. Klontzas, Michail; I. Kenanidis, Eustathios; J. MacFarlane, Robert; Michail, Theodoros; E. Potoupnis, Michael; Heliotis, Manolis; Mantalaris, Athanasios; Tsiroidis, Eleftherios      | 2016 |
| Retrospective study of sandblasted, large-grit and acid-etched implant                                                                        | Jo, Ji-Ho; Kim, Su-Gwan; Moon, Seong-Yong; Oh, Ji-Su; Park, Jin-Ju; Jung, Jong-Won; Yoon, Dae-Woong; Yang, Seong-Su; Jeong, Mi                                                           | 2011 |
| Исследование структуры взаимодействий в системе «имплантат-кость»                                                                             | Зеккий, А. О.; Широкий, А. А.                                                                                                                                                            | 2016 |
| * Mittelhessen University of Applied Sciences, Giessen, Germany                                                                               | Moseke, C.; Gbureck, U.                                                                                                                                                                  | 2019 |
| (ii) Principles and practice of antimicrobial therapy of the infected joint replacement                                                       | Jones, N.; Berendt, A. R.                                                                                                                                                                | 2000 |
| El diseño de un sistema de implante dental y su posible influencia para lograr y mantener resultados estéticos a largo plazo                  | Lazzara, Richard J.                                                                                                                                                                      | 2012 |
| Ultrastructure and Analytical Features of the Sinus Floor Augmentation with Osteograph® and PepGen P-15®                                      | Dahlet, Jean-Christophe; Boukari, Abdessamad; Collavini, Marc; Hemmerlé, Joseph                                                                                                          | 2013 |
| Implantes cortos. Reporte de 30 implantes. Parte I: oseointegración                                                                           | Arismendi, Jorge Alberto; Cabrales, Manuel; Duque, Jaiver Andrés; Castañeda, Wilmer                                                                                                      | 2011 |
| Herodontics-is there a place for maintaining the apparently hopeless tooth?                                                                   | Meyers, I. A.                                                                                                                                                                            | 2019 |
| Stem cell biology and tissue engineering in dental sciences                                                                                   | Vishwakarma, Ajaykumar; Sharpe, Paul; Shi, Songtao; Ramalingam, Murugan                                                                                                                  | 2014 |
| Tooth and Jaw, Biomechanics of                                                                                                                | Müftü, Sinan; Müftü, Ali                                                                                                                                                                 | 2006 |

|                                                                                                                                                                                                                                                                                          |                                                                                                                                                                                                |      |
|------------------------------------------------------------------------------------------------------------------------------------------------------------------------------------------------------------------------------------------------------------------------------------------|------------------------------------------------------------------------------------------------------------------------------------------------------------------------------------------------|------|
| Injectable biomaterials for regenerating complex craniofacial tissues                                                                                                                                                                                                                    | Kretlow, James D.; Young, Simon; Klouda, Leda; Wong, Mark; Mikos, Antonios G.                                                                                                                  | 2009 |
| Flap versus flapless procedure for ridge preservation in alveolar extraction sockets: a histological evaluation in a randomized clinical trial                                                                                                                                           | Iezzi, Giovanna                                                                                                                                                                                | 2014 |
| Histomorphometric Evaluation of a Calcium-Phosphosilicate Putty Bone                                                                                                                                                                                                                     | Kotsakis, Georgios A.                                                                                                                                                                          |      |
| Effects of 3D-printed polycaprolactone/ $\beta$ -tricalcium phosphate membranes on guided bone regeneration                                                                                                                                                                              | Shim, Jin-Hyung; Won, Joo-Yun; Park, Jung-Hyung; Bae, Ji-Hyeon; Ahn, Geunseon; Kim, Chang-Hwan; Lim, Dong-Hyuk; Cho, Dong-Woo; Yun, Won-Soo; Bae, Eun-Bin                                      | 2017 |
| Biomaterials for Oral and Dental Tissue Engineering                                                                                                                                                                                                                                      | Tayebi, Lobat; Moharamzadeh, Keyvan                                                                                                                                                            | 2017 |
| Differences in salivary $\alpha$ -amylase levels among women with different taste sensitivities.                                                                                                                                                                                         | Sequeira, Márcia; Rodrigues, Lénia; R Costa, Ana; Antunes, Célia; Pinheiro, Cristina; Lamy, Elsa                                                                                               | 2012 |
| 「生体多機能化インプラント」を目指して                                                                                                                                                                                                                                                                      | 吉成正雄                                                                                                                                                                                           | 2015 |
| Cage subsidence in lateral interbody fusion with transposas approach: intraoperative endplate injury or late-onset settling                                                                                                                                                              | Satake, Kotaro; Kanemura, Tokumi; Nakashima, Hiroaki; Yamaguchi, Hidetoshi; Segi, Naoki; Ouchida, Jun                                                                                          | 2017 |
| Different dental lasers vs conventional technique for second stage surgery                                                                                                                                                                                                               | Gabrić, Dragana; Katanec, Davor; Smojver, Igor; Plančak, Darije; Sušić, Mato                                                                                                                   | 2015 |
| Digital Library for Dental Biomaterials                                                                                                                                                                                                                                                  | Letic-Gavrilovic, Anka                                                                                                                                                                         | 2009 |
| J. Annie Kamala Florence 2 and PN Sudha 3 1Department of Chemistry, DKM College for Women, Vellore, Tamil Nadu, India, 2Department of Chemistry, Voorhees College, Vellore, Tamil Nadu, India, 3PG & Research Department of Chemistry, DKM College for Women, Vellore, Tamil Nadu, India | Thandapani, Gomathi; Radha, E.; Jayashri, J.                                                                                                                                                   | 2018 |
| Nano-apatites with designed chemistry and crystallinity for bone regeneration and nanomedical applications                                                                                                                                                                               | Iafisco, M.; Catalucci, D.                                                                                                                                                                     | 2016 |
| Materials and Bioactive Factors in Dental Restoration and Periodontal Therapy                                                                                                                                                                                                            | Bosnjak, Andrija Petar; D'Alpino, Paulo Henrique Perlatti                                                                                                                                      |      |
| New molecules in the tumor necrosis factor ligand and receptor superfamilies with importance for physiological and pathological bone resorption                                                                                                                                          | Lerner, Ulf H.                                                                                                                                                                                 | 2004 |
| Application of micro-CT and MRI in clinical and preclinical studies of osteoporosis and related disorders                                                                                                                                                                                | Jiang, Ye-Bin; Jacobson, Jon; Genant, Harry K.; Zhao, Jenny                                                                                                                                    | 2007 |
| Autologous Chondrocyte Implantation                                                                                                                                                                                                                                                      | Hambly, Karen; Mithoefer, Kai; Silvers, Holly J.; Mandelbaum, Bert R.                                                                                                                          | 2013 |
| Use of bone morphogenetic protein-2 and dentin matrix protein-1 to enhance the osteointegration of the Onplant system                                                                                                                                                                    | Hassan, Ali H.; Evans, Carla A.; Zaki, A. Moneim; George, Anne                                                                                                                                 | 2003 |
| Anterior cervical discectomy for one-and two-level cervical disc disease: the controversy surrounding the question of whether to fuse, plate, or both                                                                                                                                    | Alvarez, Jaime A.; Hardy, R. W.                                                                                                                                                                | 1999 |
| 1.2 Electrochemical Behavior of Metals in the Biological Milieu                                                                                                                                                                                                                          | Gilbert, J. L.                                                                                                                                                                                 | 2017 |
| Diagnostic guidelines for the histological particle algorithm in the periprosthetic neo-synovial tissue                                                                                                                                                                                  | Perino, G.; Sunitsch, S.; Huber, M.; Ramirez, D.; Gallo, J.; Vaculova, J.; Natsu, S.; Kretzer, J. P.; Müller, S.; Thomas, P.                                                                   | 2018 |
| Inducing bone growth using extracellular matrix proteins                                                                                                                                                                                                                                 | Lyngstadaas, Staal Petter; Ellingsen, Jan Eirik; Spahr, Axel; Slaby, Ivan                                                                                                                      | 2003 |
| Reconstruction of extensive long bone defects in sheep using resorbable bioceramics based on silicon stabilized tricalcium phosphate                                                                                                                                                     | Mastrogiamaco, Maddalena; Corsi, Alessandro; Francioso, Edda; Comite, Mariasevera Di; Monetti, Francesco; Scaglione, Silvia; Favia, Angela; Crovace, Antonio; Bianco, Paolo; Cancedda, Ranieri | 2006 |
| The microbiome and disease: reviewing the links between the oral microbiome, aging, and Alzheimer's disease                                                                                                                                                                              | Shoemark, Deborah K.; Allen, Shelley J.                                                                                                                                                        | 2015 |
| Fatores que influenciam no sucesso ou falha de implantes dentários.                                                                                                                                                                                                                      | Matos, Geraldo Roberto Martins                                                                                                                                                                 | 2010 |
| Biointegrating Materials                                                                                                                                                                                                                                                                 | Amédée, J.; Bordenave, L.; Durrieu, M.-C.; Fricain, J.-C.; Pothuau, L.                                                                                                                         | 2009 |
| Do serotonin reuptake inhibitor antidepressants worsen Parkinson's disease? A retrospective case series                                                                                                                                                                                  | Richard, Irene Hegeman; Maughn, Angeline; Kurlan, Roger                                                                                                                                        | 1999 |
| Nanofibre based smart pharmaceutical scaffolds for wound repair and regenerations                                                                                                                                                                                                        | Dwivedi, Charu; Pandey, Himanshu; C Pandey, Avinash; W Ramteke, Pramod                                                                                                                         | 2016 |
| Therapeutic options for postmenopausal female sexual dysfunction                                                                                                                                                                                                                         | Al-Azzawi, F.; Bitzer, J.; Brandenburg, U.; Castelo-Branco, C.; Graziottin, A.; Kenemans, P.; Lachowsky, M.; Mimoun, S.; Nappi, R. E.; Palacios, S.                                            | 2010 |
| Biological fixation in hip replacement                                                                                                                                                                                                                                                   | Hickok, Noreen J.; Purtill, James J.; Marcolongo, Michele; Tuan, Rocky S.                                                                                                                      | 2002 |
| Calcium orthophosphates (CaPO4) and dentistry                                                                                                                                                                                                                                            | Dorozhkin, S. V.                                                                                                                                                                               | 2016 |
| Introduction to corrosion of bioimplants                                                                                                                                                                                                                                                 | Novikova, G. E.                                                                                                                                                                                | 2011 |
| Study on repairing canine mandibular defect with Mg-Sr alloy                                                                                                                                                                                                                             | Wang, Cheng-Yue; Kang, Chun-Yu; Zhang, Shan-Ning; Yang, Jing-Xin; Cheng, Guang                                                                                                                 | 2018 |
| Plaque formation on the surface of modified dental implants                                                                                                                                                                                                                              | Haustein, Ingrid; Müller, Wolf-Dieter; Lange, Klaus-Peter; Briedigkeit, Helga; Gäbel, Ulf Bathold                                                                                              | 2001 |
| Manejo clínico y tratamiento de la infección periimplantaria. Presentación de 6 casos                                                                                                                                                                                                    | Delgado Molina, Esther; Sánchez Garcés, M. A.; Berini Aytés, Leonardo; Gay Escoda, Cosme                                                                                                       | 1998 |
| INTRODUCTION TO PROCESSING OF BIOIMATERIALS                                                                                                                                                                                                                                              | Katti, Dharendra S.; Pandya, Shaunak; Bora, Meghali; Mahida, Rakesh                                                                                                                            | 2010 |

|                                                                                                                                                                                  |                                                                                                                                                                                |      |
|----------------------------------------------------------------------------------------------------------------------------------------------------------------------------------|--------------------------------------------------------------------------------------------------------------------------------------------------------------------------------|------|
| A 3D FINITE ELEMENT ANALYSIS.                                                                                                                                                    | SANNINO, G.; GLORIA, F.; OTTRIA, L.; BARLATTANI, A.                                                                                                                            |      |
| Zinc-based alloys for degradable vascular stent applications                                                                                                                     | Mostaed, Ehsan; Sikora-Jasinska, Malgorzata; Drelich, Jaroslaw W.; Vedani, Maurizio                                                                                            | 2018 |
| Osteolysis in total hip arthroplasty: biological and clinical aspects                                                                                                            | PATHOPHYSIOLOGY, I.                                                                                                                                                            | 2002 |
| Compatibility of resorbable and nonresorbable guided tissue regeneration membranes in cultures of primary human periodontal ligament fibroblasts and human osteoblast-like cells | Alpar, Berna; Leyhausen, Gabriele; Günay, Huesamettin; Geurtsen, W.                                                                                                            | 2000 |
| Periostin promotes migration, proliferation, and differentiation of human periodontal ligament mesenchymal stem cells                                                            | Wu, Ziqiang; Dai, Wenyong; Wang, Pei; Zhang, Xiaozhen; Tang, Yi; Liu, Lin; Wang, Qiaona; Li, Ming; Tang, Chunbo                                                                | 2018 |
| Materials for bone regeneration: Current types, bioactive mechanism and updated investigations                                                                                   | He, Yuqi; He, Wei; Fan, Yubo; Li, Xiaoming                                                                                                                                     | 2019 |
| Cemented versus cementless hip arthroplasty A review of prosthetic biocompatibility                                                                                              | Santavirta, Seppo; Gristina, Anthony; Kontinen, Yrjö T.                                                                                                                        | 1992 |
| Current Knowledge: The Regenerative Potential of Periosteum-Derived Cells and Their Application in Oral and Craniofacial Therapy                                                 | Stern, J. Kobi; Zhou, Zheng; Rawlings, Aaron; Kao, Solon; Cutler, Christopher; Rios, Hector                                                                                    | 2016 |
| Transplantation and Implantation, November 17-20, 2015, Mashhad, Iran                                                                                                            | Ghasemi, D.; Momeni, M.                                                                                                                                                        |      |
| Abstracts from International Congress of Transplantation and Implantation, November 17-20, 2015, Mashhad, Iran                                                                   | Aliakbarian, M.                                                                                                                                                                | 2016 |
| Pathogenesis of prosthesis-related infection                                                                                                                                     | Gallo, Jirí; Kolar, M.; Novotny, R.; Rihakova, P.; Tichá, Vlasta                                                                                                               | 2003 |
| Recombinant human plasminogen activator inhibitor-1 promotes cementogenic differentiation of human periodontal ligament stem cells                                               | Jin, Hexiu; Choung, Han-Wool; Lim, Ki-Taek; Jin, Bin; Jin, Chengbiao; Chung, Jong-Hoon; Choung, Pill-Hoon                                                                      | 2015 |
| Gomathi Thandapani, E. Radha, J. Jayashri                                                                                                                                        | Florence, J. Annie Kamala; Sudha, P. N.                                                                                                                                        | 2018 |
| Self-Assembling Peptide Amphiphile Nanofibers for Angiogenesis and Cardiovascular Disease                                                                                        | Webber, Matthew J.                                                                                                                                                             | 2011 |
| Total disc replacement arthroplasty using the AcroFlex lumbar disc: a non-human primate model                                                                                    | Cunningham, Bryan W.; Lowery, Gary L.; Serhan, Hassan A.; Dmitriev, Anton E.; Orbegoso, Carlos M.; McAfee, Paul C.; Fraser, Robert D.; Ross, Raymond E.; Kulkarni, Samir S.    | 2004 |
| Interim use of the Jarvik-7 artificial heart: lessons learned at Presbyterian-University Hospital of Pittsburgh                                                                  | Griffith, Bartley P.                                                                                                                                                           | 1989 |
| Urea and creatinine levels in saliva of patients with and without periodontitis                                                                                                  | Gaál Kovalčíková, Alexandra; Pančíková, Alexandra; Konečná, Barbora; Klamárová, Tatiana; Novák, Bohuslav; Koval'ová, Eva; Podracká, L'udmila; Celec, Peter; Tóthová, L'ubomíra |      |
| SR Dutta, D. Passi, P. Singh &                                                                                                                                                   | Bhuibhar, A.                                                                                                                                                                   | 2015 |
| Bone regeneration in a rabbit critical-sized skull defect using autologous adipose-derived cells                                                                                 | Di Bella, Claudia; Farlie, Peter; Penington, Anthony J.                                                                                                                        | 2008 |
| Annual review of selected scientific literature: A report of the Committee on Scientific Investigation of the American Academy of Restorative Dentistry                          | Donovan, Terence E.; Marzola, Riccardo; Murphy, Kevin R.; Cagna, David R.; Eichmiller, Frederick; McKee, James R.; Metz, James E.; Albouy, Jean-Pierre; Troeltzsch, Mathias    | 2018 |
| Multifunctional biomaterials and their bioinspired systems for bioactive molecules delivery                                                                                      | Swartjes, JJTM                                                                                                                                                                 | 2017 |
| Materials, Chemicals and Methods for Dental Applications                                                                                                                         | Fink, Johannes Karl                                                                                                                                                            | 2018 |
| Biodegradable polymers for controlled delivery of chemotherapy with and without radiation therapy in the monkey brain                                                            | Brem, Henry; Tamargo, Rafael J.; Olivi, Alessandro; Pinn, Michael; Weingart, Jon D.; Wharam, Moody; Epstein, Jonathan I.                                                       | 1994 |
| TREATMENT OF THE MUCOALVEOLAR COMPLEX IMMEDIATELY AFTER TOOTH EXTRACTION                                                                                                         | de Souza Pinto, Vicente; Couy, Karina Chaves; de Souza Pinto, Midori Nozaki; Paulon, Pedro                                                                                     | 2015 |
| Nutritional correlates of human oral microbiome                                                                                                                                  | Kato, Ikuko; Vasquez, Adrian; Moyerbrailean, Gregory; Land, Susan; Djuric, Zora; Sun, Jun; Lin, Ho-Sheng; Ram, Jeffrey L.                                                      | 2017 |
| An ovine model of cranial cruciate ligament reconstruction                                                                                                                       | Field, J. R.; Adachi, N.; Ochi, M.                                                                                                                                             | 2001 |
| M. Saquib Hasnain \S                                                                                                                                                             |                                                                                                                                                                                |      |
| Hypersensitivity to Cardiovascular                                                                                                                                               | Svedman, Cecilia; Bruze, Magnus                                                                                                                                                | 2018 |
| Distribution of pressures and forces on the wrist after simulated intercarpal fusion and Kienbock's disease                                                                      | Short, W. H.; Werner, F. W.; Fortino, M. D.; Palmer, A. K.                                                                                                                     | 1992 |
| Assessment of Adhesion and Proliferation of Bone Marrow Mesenchymal Stem Cells in Polymer Matrices with rhGH.                                                                    | da Silveira Gerzson, Alexandre; Machado, Denise Cantarelli; Rodrigo Marinovic, Daniel; Pagnoncelli, Rogério Miranda                                                            | 2017 |
| Fungi at the Scene of the Crime: Innocent Bystanders or Accomplices in Oral Infections?                                                                                          | Delaney, Christopher; Kean, Ryan; Short, Bryn; Tumelty, Maria; McLean, William; Nile, Christopher J.; Ramage, Gordon                                                           | 2018 |
| Mohamadreza Baghaban Eslaminejad Royan Institute for Stem Cell Biology and Technology, ACECR, Tehran, Iran                                                                       | Hosseini, Samaneh; Jahangir, Shahrbanoo                                                                                                                                        | 2017 |
| Adenosine-associated delivery systems                                                                                                                                            | Kazemzadeh-Narbat, Mehdi; Annabi, Nasim; Tamayol, Ali; Oklu, Rahmi; Ghanem, Amyl; Khademhosseini, Ali                                                                          | 2015 |
| BIO-ARTIFICIAL MYOCARDIUM FOR THE TREATMENT OF ISCHEMIC HEART DISEASE: FIRST CLINICAL EXPERIENCE                                                                                 | Chachques, Juan C.                                                                                                                                                             | 2011 |
| Department of Biomedical engineering                                                                                                                                             | Family, J. Crayton Pruitt                                                                                                                                                      |      |
| Advanced regenerative techniques based on dental pulp stem cells for the treatment of periodontal disease                                                                        | Seciu, Ana-Maria; Craciunescu, Oana; Zarnescu, Otilia                                                                                                                          | 2018 |
| FACULTAD DE ODONTOLOGÍA                                                                                                                                                          | DE CRECIMIENTO, EFECTO DE LA HORMONA                                                                                                                                           | 2016 |

|                                                                                                                                                               |                                                                                                                                                      |      |
|---------------------------------------------------------------------------------------------------------------------------------------------------------------|------------------------------------------------------------------------------------------------------------------------------------------------------|------|
| Porosity effect of 3D-printed polycaprolactone membranes on calvarial defect model for guided bone regeneration                                               | Shim, Jin-Hyung; Jeong, Jae-hyang; Won, Joo-Yun; Bae, Ji-Hyeon; Ahn, Geunseon; Jeon, Hojun; Yun, Won-Soo; Bae, Eun-Bin; Choi, Jae-Won; Lee, So-Hyoun | 2017 |
| State of the art and recent patents on Mg-based biodegradable bone implants                                                                                   | Neacsu, Patricia; N Ion, Raluca; Mitran, Valentina; I Staras, Adela; Cimpean, Anisoara                                                               | 2014 |
| Simulation of bone ingrowth                                                                                                                                   | Andreykiv, Andriy                                                                                                                                    | 2006 |
| Blood vessel maturation in health and disease and its implications for vascularization of engineered tissues                                                  | Sun, Xuetao; Evren, Sevan; Nunes, Sara S.                                                                                                            | 2015 |
| Nanobiomaterials in dentistry: applications of nanobiomaterials                                                                                               | Grumezescu, Alexandru                                                                                                                                | 2016 |
| Periprosthetic infection—bacteria and the interface between prosthesis and bone                                                                               | Frommelt, L.                                                                                                                                         | 2000 |
| Reoperation rates for symptomatic nonunions in posterior cervical (subaxial) fusions with and without bone morphogenetic protein in a cohort of 1158 patients | Guppy, Kern H.; Harris, Jessica; Chen, Jason; Paxton, Elizabeth W.; Alvarez, Julie; Bernbeck, Johannes                                               | 2016 |
| Assessing the potential of mesenchymal stem cells in craniofacial bone repair and regeneration                                                                | Waddington, Rachel J.; Jones, S. Quentin; Moseley, Ryan                                                                                              | 1988 |
| A comprehensive simulation-based methodology for the design and optimization of orthopaedic internal fixation implants                                        | Arnone, Joshua                                                                                                                                       | 2011 |
| Materials for 3D printing in medicine: Metals, polymers, ceramics, hydrogels                                                                                  | Poologasundarampillai, Gowsihan; Nommeets-Nomm, Amy                                                                                                  | 2017 |
| Histomorphometric evaluation of a calcium-phosphosilicate putty bone substitute in extraction sockets.                                                        | Kotsakis, Georgios A.; Joachim, C.; Frédéric, P.; Saroff, Stephen A.; Mahesh, Lanka; Prasad, Hari; Rohrer, Michael D.                                | 2014 |
| Bone Grafting and the Materials for Using in Orthopedics                                                                                                      | Harsini, Somayeh Monazzah; Oryan, Ahmad                                                                                                              | 2018 |
| The oral microbiota: living with a permanent guest                                                                                                            | Avila, Maria; Ojcius, David M.; Yilmaz, Özlem                                                                                                        | 2009 |
| 1Thapar University, Patiala, India; 2Bhabha Atomic Research Centre, Mumbai, India                                                                             | Agnihotri, Shekhar; Dhiman, Navneet K.; Tripathi, Anuj                                                                                               | 2017 |
| Current patents on osteoinductive molecules for bone tissue engineering                                                                                       | WH Lo, Kevin; D Ulery, Bret; Deng, Meng; M Ashe, Keshia; T Laurencin, Cato                                                                           | 2011 |
| Pharmacological interventions for osteoporosis in people with chronic kidney disease stages 3-5D                                                              | Hara, , T, Hijikata, Y, Matsubara, Y; Watanabe, N                                                                                                    | 2019 |
| Metformin for preventing the progression of chronic kidney disease                                                                                            | El-Damanawi, , R, Vieceili, AK, Pascoe, EM, Craig, JC, Johnson, DW, Mallett, AJ, Hawley, CM; Hiemstra, TF                                            | 2019 |
| Acupuncture for slowing the progression of myopia in children and adolescents                                                                                 | Wei, , ML, Liu, JP, Li, N; Liu, M                                                                                                                    | 2011 |
| Acupuncture for glaucoma                                                                                                                                      | Law, , SK; Li, T                                                                                                                                     | 2013 |
| Acupuncture for shoulder pain                                                                                                                                 | Green, , S, Buchbinder, R; Hetrick, SE                                                                                                               | 2005 |
| Acupuncture for vascular dementia                                                                                                                             | Peng, , W, Wang, Y, Zhang, Y; Liang, CM                                                                                                              | 2007 |
| Adjuvant chemotherapy for invasive bladder cancer (individual patient data)                                                                                   | Vale, CL                                                                                                                                             | 2006 |
| Action plans with brief patient education for exacerbations in chronic obstructive pulmonary disease                                                          | Howcroft, , M, Walters, EH, Wood-Baker, R; Walters, JAE                                                                                              | 2016 |
| Abstinence-only programs for HIV infection prevention in high-income countries                                                                                | Underhill, , K, Operario, D; Montgomery, P                                                                                                           | 2007 |
| Adenoidectomy for recurrent or chronic nasal symptoms in children                                                                                             | van den Aardweg, , MTA, Schilder, AGM, Herkert, E, Boonacker, CWB; Rovers, MM                                                                        | 2010 |
| Addition of long-acting beta2-agonists to inhaled steroids versus higher dose inhaled steroids in adults and children with persistent asthma                  | Ducharme, , FM, Ni Chroinin, M, Greenstone, I; Lasserson, TJ                                                                                         | 2010 |
| Addition of anti-leukotriene agents to inhaled corticosteroids for adults and adolescents with persistent asthma                                              | Chauhan, , BF, Jeyaraman, MM, Singh Mann, A, Lys, J, Abou-Setta, AM, Zarychanski, R; Ducharme, FM                                                    | 2017 |
| Acetylcysteine and carbocysteine for acute upper and lower respiratory tract infections in paediatric patients without chronic broncho-pulmonary disease      | Chalumeau, , M; Duijvestijn, YCM                                                                                                                     | 2013 |
| Adjunctive steroid therapy for managing pulmonary tuberculosis                                                                                                | Critchley, , JA, Orton, LC; Pearson, F                                                                                                               | 2014 |
| Abdominal decompression for suspected fetal compromise/pre-eclampsia                                                                                          | Hofmeyr, GJ                                                                                                                                          | 2012 |
| Adjunctive therapies for AIDS dementia complex                                                                                                                | Uthman, , OA; Abdulmalik, JO                                                                                                                         | 2008 |
| Adjuvant (post-surgery) chemotherapy for early stage epithelial ovarian cancer                                                                                | Lawrie, , TA, Winter-Roach, BA, Heus, P; Kitchener, HC                                                                                               | 2015 |
| Acetylcholinesterase inhibitor treatment for myasthenia gravis                                                                                                | Mehndiratta, , MM, Pandey, S; Kuntzer, T                                                                                                             | 2014 |
| Adenoidectomy for otitis media in children                                                                                                                    | van den Aardweg, , MTA, Schilder, AGM, Herkert, E, Boonacker, CWB; Rovers, MM                                                                        | 2010 |
| Adjuvant corticosteroids for reducing death in neonatal bacterial meningitis                                                                                  | Ogunlesi, , TA, Odigwe, CC; Oladapo, OT                                                                                                              | 2015 |
| Acupuncture for stroke rehabilitation                                                                                                                         | Yang, , A, Wu, HM, Tang, JL, Xu, L, Yang, M; Liu, GJ                                                                                                 | 2016 |
| 18F-FDG PET for the early diagnosis of Alzheimer's disease dementia and other dementias in people with mild cognitive impairment (MCI)                        | Smailagic, , N, Vacante, M, Hyde, C, Martin, S, Ukoumunne, O; Sachpekidis, C                                                                         | 2015 |
| Acetaminophen for osteoarthritis                                                                                                                              | Towheed, , T, Maxwell, L, Judd, M, Catton, M, Hochberg, MC; Wells, GA                                                                                | 2006 |

|                                                                                                                                                                                                         |                                                                                                                         |      |
|---------------------------------------------------------------------------------------------------------------------------------------------------------------------------------------------------------|-------------------------------------------------------------------------------------------------------------------------|------|
| Acupuncture for insomnia                                                                                                                                                                                | Cheuk, , DKL, Yeung, WF, Chung, KF; Wong, V                                                                             | 2012 |
| Abatacept for rheumatoid arthritis                                                                                                                                                                      | Maxwell, , L; Singh, JA                                                                                                 | 2009 |
| Acupuncture for symptomatic gastroparesis                                                                                                                                                               | Kim, , KH, Lee, MS, Choi, TY; Kim, TH                                                                                   | 2018 |
| Active cycle of breathing technique for cystic fibrosis                                                                                                                                                 | Mckoy, , NA, Wilson, LM, Saldanha, IJ, Odelola, OA; Robinson, KA                                                        | 2016 |
| Human' insulin versus animal insulin in people with diabetes mellitus                                                                                                                                   | Richter, , B; Neises, G                                                                                                 | 2005 |
| A 'test and treat' strategy for elevated wound protease activity for healing in venous leg ulcers                                                                                                       | Norman, , G, Westby, MJ, Stubbs, N, Dumville, JC; Cullum, N                                                             | 2016 |
| Third wave' cognitive and behavioural therapies versus other psychological therapies for depression                                                                                                     | Hunot, , V, Moore, THM, Caldwell, DM, Furukawa, TA, Davies, P, Jones, H, Honyashiki, M, Chen, P, Lewis, G; Churchill, R | 2013 |
| Third wave' cognitive and behavioural therapies versus treatment as usual for depression                                                                                                                | Churchill, , R, Moore, THM, Furukawa, TA, Caldwell, DM, Davies, P, Jones, H, Shinohara, K, Imai, H, Lewis, G; Hunot, V  | 2013 |
| 5-FU for genital warts in non-immunocompromised individuals                                                                                                                                             | Batista, , CS, Atallah, AN, Saconato, H; da Silva, EMK                                                                  | 2010 |
| Additional plerixafor to granulocyte colony-stimulating factors for haematopoietic stem cell mobilisation for autologous transplantation in people with malignant lymphoma or multiple myeloma          | Hartmann, , T, Hübel, K, Monsef, I, Engert, A; Skoetz, N                                                                | 2015 |
| Active chest compression-decompression for cardiopulmonary resuscitation                                                                                                                                | Lafuente-Lafuente, , C; Melero-Bascones, M                                                                              | 2013 |
| Acupuncture for restless legs syndrome                                                                                                                                                                  | Cui, , Y, Wang, Y; Liu, Z                                                                                               | 2008 |
| Acanthopanax for acute ischaemic stroke                                                                                                                                                                 | Li, , W, Liu, M, Feng, S, Wu, B, Zhang, S, Yang, W; Liu, GJ                                                             | 2009 |
| Acupuncture for treating fibromyalgia                                                                                                                                                                   | Deare, , JC, Zheng, Z, Xue, CCL, Liu, JP, Shang, J, Scott, SW; Littlejohn, G                                            | 2013 |
| Adjuvant antiviral therapy for recurrent respiratory papillomatosis                                                                                                                                     | Chadha, , NK; James, A                                                                                                  | 2012 |
| Abdominal drainage versus no drainage post-gastrectomy for gastric cancer                                                                                                                               | Wang, , Z, Chen, J, Su, K; Dong, Z                                                                                      | 2015 |
| Active mind-body movement therapies as an adjunct to or in comparison with pulmonary rehabilitation for people with chronic obstructive pulmonary disease                                               | Gendron, , LM, Nyberg, A, Saey, D, Maltais, F; Lacasse, Y                                                               | 2018 |
| 11C-PIB-PET for the early diagnosis of Alzheimer's disease dementia and other dementias in people with mild cognitive impairment (MCI)                                                                  | Zhang, , S, Smailagic, N, Hyde, C, Noel-Storr, AH, Takwoingi, Y, McShane, R; Feng, J                                    | 2014 |
| Acupuncture for lateral elbow pain                                                                                                                                                                      | Green, , S, Buchbinder, R, Barnsley, L, Hall, S, White, M, Smidt, N; Assendelft, WJJ                                    | 2002 |
| Addition of long-acting beta2-agonists to inhaled corticosteroids versus same dose inhaled corticosteroids for chronic asthma in adults and children                                                    | Ducharme, , FM, Ni Chroinin, M, Greenstone, I; Lasserson, TJ                                                            | 2010 |
| Acupuncture for acute management and rehabilitation of traumatic brain injury                                                                                                                           | Wong, , V, Cheuk, DKL, Lee, S; Chu, V                                                                                   | 2013 |
| 5-alpha-reductase inhibitors for prostate cancer prevention                                                                                                                                             | Wilt, , TJ, MacDonald, R, Hagerty, K, Schellhammer, P; Kramer, BS                                                       | 2008 |
| Addition of anti-leukotriene agents to inhaled corticosteroids for chronic asthma                                                                                                                       | Ducharme, FM                                                                                                            | 2004 |
| Addition of long-acting beta2-agonists to inhaled corticosteroids for chronic asthma in children                                                                                                        | Chauhan, , BF, Chartrand, C, Ni Chroinin, M, Milan, SJ; Ducharme, FM                                                    | 2015 |
| Acupuncture for Bell's palsy                                                                                                                                                                            | Chen, , N, Zhou, M, He, L, Zhou, D; Li, N                                                                               | 2010 |
| Acupuncture for Attention Deficit Hyperactivity Disorder (ADHD) in children and adolescents                                                                                                             | Li, , S, Yu, B, Zhou, D, He, C, Kang, L, Wang, X, Jiang, S; Chen, X                                                     | 2011 |
| Adjunctive steroid therapy versus antibiotics alone for acute endophthalmitis after intraocular procedure                                                                                               | Kim, , CH, Chen, MF; Coleman, AL                                                                                        | 2017 |
| Acupuncture and electroacupuncture for the treatment of rheumatoid arthritis                                                                                                                            | Casimiro, , L, Barnsley, L, Brosseau, L, Milne, S, Welch, V, Tugwell, P; Wells, GA                                      | 2005 |
| Acetylsalicylic acid (aspirin) for schizophrenia                                                                                                                                                        | Schmidt, , L, Phelps, E, Friedel, J; Shokrane, F                                                                        | 2019 |
| Adenosine and verapamil for no-reflow during primary percutaneous coronary intervention in people with acute myocardial infarction                                                                      | Su, , Q, Nyi, TS; Li, L                                                                                                 | 2015 |
| Adenosine-diphosphate (ADP) receptor antagonists for the prevention of cardiovascular disease in type 2 diabetes mellitus                                                                               | Valentine, , N, Van de Laar, FA; van Driel, ML                                                                          | 2012 |
| Active body surface warming systems for preventing complications caused by inadvertent perioperative hypothermia in adults                                                                              | Madrid, , E, Urrútia, G, Roqué i Figuls, M, Pardo-Hernandez, H, Campos, JM, Paniagua, P, Maestre, L; Alonso-Coello, P   | 2016 |
| Abdominal drainage to prevent intra-peritoneal abscess after open appendectomy for complicated appendicitis                                                                                             | Li, , Z, Zhao, L, Cheng, Y, Cheng, N; Deng, Y                                                                           | 2018 |
| Acyclovir for treating varicella in otherwise healthy children and adolescents                                                                                                                          | Klassen, , TP; Hartling, L                                                                                              | 2005 |
| A therapeutic-only versus prophylactic platelet transfusion strategy for preventing bleeding in patients with haematological disorders after myelosuppressive chemotherapy or stem cell transplantation | Crighton, , GL, Estcourt, LJ, Wood, EM, Trivella, M, Doree, C; Stanworth, S                                             | 2015 |
| Acupuncture for mumps in children                                                                                                                                                                       | He, , J, Jia, P, Zheng, M, Zhang, M; Jiang, H                                                                           | 2015 |
| Active placebos versus antidepressants for depression                                                                                                                                                   | Moncrieff, , J, Wessely, S; Hardy, R                                                                                    | 2004 |
| Addition of anti-leukotriene agents to inhaled corticosteroids in children with persistent asthma                                                                                                       | Chauhan, , BF, Ben Salah, R; Ducharme, FM                                                                               | 2013 |



|                                                                                                                                                     |                                                                                                                                                    |      |
|-----------------------------------------------------------------------------------------------------------------------------------------------------|----------------------------------------------------------------------------------------------------------------------------------------------------|------|
| Active versus expectant management for women in the third stage of labour                                                                           | Begley, , CM, Gyte, GML, Devane, D, McGuire, W, Weeks, A; Biesty, LM                                                                               | 2019 |
| Ab interno trabecular bypass surgery with iStent for open-angle glaucoma                                                                            | Le, , JT, Bicket, AK, Wang, L; Li, T                                                                                                               | 2019 |
| Adjuvant gonadotropin-releasing hormone analogues for the prevention of chemotherapy-induced premature ovarian failure in premenopausal women       | Chen, , H, Xiao, L, Li, J, Cui, L; Huang, W                                                                                                        | 2019 |
| Acetyl-L-carnitine for the treatment of diabetic peripheral neuropathy                                                                              | Rolim, , LCSP, da Silva, EMK, Flumignan, RLG, Abreu, MM; Dib, SA                                                                                   | 2019 |
| Acupuncture and acupressure for premenstrual syndrome                                                                                               | Armour, , M, Ee, CC, Hao, J, Wilson, TM, Yao, SS; Smith, CA                                                                                        | 2018 |
| Acupuncture for functional dyspepsia                                                                                                                | Lan, , L, Zeng, F, Liu, GJ, Ying, L, Wu, X, Liu, M; Liang, FR                                                                                      | 2014 |
| Addition of intravenous aminophylline to inhaled beta2-agonists in adults with acute asthma                                                         | Nair, , P, Milan, SJ; Rowe, BH                                                                                                                     | 2012 |
| Acupuncture for treatment of irritable bowel syndrome                                                                                               | Manheimer, , E, Cheng, K, Wieland, LS, Min, LS, Shen, X, Berman, BM; Lao, L                                                                        | 2012 |
| Adalimumab for treating rheumatoid arthritis                                                                                                        | Navarro-Sarabia, , F, Ariza-Ariza, R, Hernandez-Cruz, B; Villanueva, I                                                                             | 2005 |
| Acupuncture for acute stroke                                                                                                                        | Xu, , M, Li, D; Zhang, S                                                                                                                           | 2018 |
| Activity monitors for increasing physical activity in adult stroke survivors                                                                        | Lynch, , EA, Jones, TM, Simpson, DB, Fini, NA, Kuys, SS, Borschmann, K, Kramer, S, Johnson, L, Callisaya, ML, Mahendran, N, Janssen, H; English, C | 2018 |
| Active case finding in contacts of people with tuberculosis                                                                                         | Fox, , GJ, Dobler, CC; Marks, GB                                                                                                                   | 2011 |
| Addition of intravenous beta2-agonists to inhaled beta2-agonists for acute asthma                                                                   | Travers, , AH, Milan, SJ, Jones, AP, Camargo Jr, CA; Rowe, BH                                                                                      | 2012 |
| Adhesion prevention agents for gynaecological surgery: an overview of Cochrane reviews                                                              | Hindocha, , A, Beere, L, Dias, S, Watson, A; Ahmad, G                                                                                              | 2015 |
| Abacavir-based triple nucleoside regimens for maintenance therapy in patients with HIV                                                              | Cruciani, , M, Mengoli, C, Serpelloni, G, Parisi, SG, Malena, M; Bosco, O                                                                          | 2013 |
| Addition to inhaled corticosteroids of long-acting beta2-agonists versus anti-leukotrienes for chronic asthma                                       | Chauhan, , BF; Ducharme, FM                                                                                                                        | 2014 |
| Acupuncture for peripheral joint osteoarthritis                                                                                                     | Manheimer, , E, Cheng, K, Linde, K, Lao, L, Yoo, J, Wieland, S, van der Windt, DAWM, Berman, BM; Bouter, LM                                        | 2010 |
| Acamprosate for alcohol dependence                                                                                                                  | Rösner, , S, Hackl-Herrwerth, A, Leucht, S, Leher, P, Vecchi, S; Soyka, M                                                                          | 2010 |
| 123I-MIBG scintigraphy and 18F-FDG-PET imaging for diagnosing neuroblastoma                                                                         | Bleeker, , G, Tytgat, GAM, Adam, JA, Caron, HN, Kremer, LCM, Hooft, L; van Dalen, EC                                                               | 2015 |
| Acupuncture for chronic hepatitis B                                                                                                                 | Kong, , DZ, Liang, N, Yang, GL, Zhang, Z, Liu, Y, Yang, Y, Liu, YX, Wang, QG, Zhang, F, Zhang, HY, Nikolova, D, Jakobsen, JC, Gluud, C; Liu, JP    | 2019 |
| Acupuncture for polycystic ovarian syndrome                                                                                                         | Lim, , CED, Ng, RWC, Cheng, NCL, Zhang, GS; Chen, H                                                                                                | 2019 |
| Adjuvant radiotherapy following radical prostatectomy for prostate cancer                                                                           | Daly, , T, Hickey, BE, Lehman, M, Francis, DP; See, AM                                                                                             | 2011 |
| Alemtuzumab for patients with chronic lymphocytic leukaemia                                                                                         | Skoetz, , N, Bauer, K, Elter, T, Monsef, I, Roloff, V, Hallek, M; Engert, A                                                                        | 2012 |
| Anabolic steroids for the treatment of weight loss in HIV-infected individuals                                                                      | Johns, , KKJ, Beddall, MJ; Corrin, RC                                                                                                              | 2005 |
| Adjuvant radiotherapy for stage I endometrial cancer                                                                                                | Kong, , A, Johnson, N, Kitchener, HC; Lawrie, TA                                                                                                   | 2012 |
| Alpha-2 agonists for long-term sedation during mechanical ventilation in critically ill patients                                                    | Chen, , K, Lu, Z, Xin, YC, Cai, Y, Chen, Y; Pan, SM                                                                                                | 2015 |
| Airway clearance techniques for chronic obstructive pulmonary disease                                                                               | Osadnik, , CR, McDonald, CF, Jones, AP; Holland, AE                                                                                                | 2012 |
| Alternatives to inpatient mental health care for children and young people                                                                          | Shepperd, , S, Doll, H, Gowers, S, James, A, Fazel, M, Fitzpatrick, R; Pollock, J                                                                  | 2009 |
| Aldosterone antagonists for preventing the progression of chronic kidney disease                                                                    | Bolignano, , D, Palmer, SC, Navaneethan, SD; Strippoli, GFM                                                                                        | 2014 |
| Angiotensin-converting enzyme inhibitors and angiotensin receptor blockers for adults with early (stage 1 to 3) non-diabetic chronic kidney disease | Sharma, , P, Blackburn, RC, Parke, CL, McCullough, K, Marks, A; Black, C                                                                           | 2011 |
| Alpha lipoic acid for dementia                                                                                                                      | Klugman, , A, Sauer, J, Tabet, N; Howard, R                                                                                                        | 2004 |
| Ambulatory and short-burst oxygen for interstitial lung disease                                                                                     | Sharp, , C, Adamali, H; Millar, AB                                                                                                                 | 2016 |
| Amniotomy for shortening spontaneous labour                                                                                                         | Smyth, , RMD, Markham, C; Dowswell, T                                                                                                              | 2013 |
| Androgens for the anaemia of chronic kidney disease in adults                                                                                       | Yang, , Q, Abudou, M, Xie, XS; Wu, T                                                                                                               | 2014 |
| An overview of reviews evaluating the effectiveness of financial incentives in changing healthcare professional behaviours and patient outcomes     | Flodgren, , G, Eccles, MP, Shepperd, S, Scott, A, Parmelli, E; Beyer, FR                                                                           | 2011 |
| Amodiaquine for treating malaria                                                                                                                    | Olliaro, , PL; Mussano, P                                                                                                                          | 2003 |
| Alcoholics Anonymous and other 12-step programmes for alcohol dependence                                                                            | Ferri, , M, Amato, L; Davoli, M                                                                                                                    | 2006 |

|                                                                                                                        |                                                                                                                                                                                                                                                                                   |      |
|------------------------------------------------------------------------------------------------------------------------|-----------------------------------------------------------------------------------------------------------------------------------------------------------------------------------------------------------------------------------------------------------------------------------|------|
| Amniocentesis and chorionic villus sampling for prenatal diagnosis                                                     | Alfirevic, , Z, Navaratnam, K; Mujezinovic, F                                                                                                                                                                                                                                     | 2017 |
| Aminosalicylates for induction of remission or response in Crohn's disease                                             | Lim, , WC, Wang, Y, MacDonald, JK; Hanauer, S                                                                                                                                                                                                                                     | 2016 |
| Advanced training in trauma life support for ambulance crews                                                           | Jayaraman, , S, Sethi, D; Wong, R                                                                                                                                                                                                                                                 | 2014 |
| Ambroxol for women at risk of preterm birth for preventing neonatal respiratory distress syndrome                      | Gonzalez Garay, , AG, Reveiz, L, Velasco Hidalgo, L; Solis Galicia, C                                                                                                                                                                                                             | 2014 |
| Angioplasty versus stenting for iliac artery lesions                                                                   | Bekken, , J, Jongsma, H, Ayez, N, Hoogewerf, CJ, Van Weel, V; Fioole, B                                                                                                                                                                                                           | 2015 |
| Adjuvant Therapy for completely resected Stage II Colon Cancer                                                         | Figueredo, , A, Coombes, ME; Mukherjee, S                                                                                                                                                                                                                                         | 2008 |
| Anaesthetic and sedative agents used for electrical cardioversion                                                      | Lewis, , SR, Nicholson, A, Reed, SS, Kenth, JJ, Alderson, P; Smith, AF                                                                                                                                                                                                            | 2015 |
| Alpha-2 adrenergic agonists for the prevention of cardiac complications among adults undergoing surgery                | Duncan, , D, Sankar, A, Beattie, WS; Wijeyesundera, DN                                                                                                                                                                                                                            | 2018 |
| Adjuvant therapy with antidepressants for the management of inflammatory bowel disease                                 | Mikocka-Walus, , A, Prady, SL, Pollok, J, Esterman, AJ, Gordon, AL, Knowles, S; Andrews, JM                                                                                                                                                                                       | 2019 |
| Aerosolized prostacyclins for acute respiratory distress syndrome (ARDS)                                               | Afshari, , A, Bastholm Bille, A; Allingstrup, M                                                                                                                                                                                                                                   | 2017 |
| Alternative lipid emulsions versus pure soy oil based lipid emulsions for parenterally fed preterm infants             | Kapoor, , V, Glover, R; Malviya, MN                                                                                                                                                                                                                                               | 2015 |
| Advanced trauma life support training for hospital staff                                                               | Jayaraman, , S, Sethi, D, Chinnock, P; Wong, R                                                                                                                                                                                                                                    | 2014 |
| Allopurinol for chronic gout                                                                                           | Seth, , R, Kydd, ASR, Buchbinder, R, Bombardier, C; Edwards, CJ                                                                                                                                                                                                                   | 2014 |
| Anaesthesia for treating distal radial fracture in adults                                                              | Handoll, , HHG, Madhok, R; Dodds, C                                                                                                                                                                                                                                               | 2002 |
| Allopurinol for chronic prostatitis                                                                                    | McNaughton Collins, , M; Wilt, TJ                                                                                                                                                                                                                                                 | 2002 |
| Air versus saline in the loss of resistance technique for identification of the epidural space                         | Antibas, , PL, do Nascimento Junior, P, Braz, LG, Vitor Pereira Doles, J, Módolo, NSP; El Dib, R                                                                                                                                                                                  | 2014 |
| Adrenaline auto-injectors for the treatment of anaphylaxis with and without cardiovascular collapse in the community   | Sheikh, , A, Simons, FER, Barbour, V; Worth, A                                                                                                                                                                                                                                    | 2012 |
| Alendronate for the primary and secondary prevention of osteoporotic fractures in postmenopausal women                 | Wells, , GA, Cranney, A, Peterson, J, Boucher, M, Shea, B, Welch, V, Coyle, D; Tugwell, P                                                                                                                                                                                         | 2008 |
| Allogeneic hematopoietic cell transplantation for adult acute lymphoblastic leukemia (ALL) in first complete remission | Pidala, , J, Djulbegovic, B, Anasetti, C, Kharfan-Dabaja, M; Kumar, A                                                                                                                                                                                                             | 2011 |
| Altered dietary salt intake for people with chronic kidney disease                                                     | McMahon, , EJ, Campbell, KL, Bauer, JD; Mudge, DW                                                                                                                                                                                                                                 | 2015 |
| Aerobic exercise interventions for adults living with HIV/AIDS                                                         | O'Brien, , K, Nixon, S, Tynan, AM; Glazier, R                                                                                                                                                                                                                                     | 2010 |
| Aloe vera for prevention and treatment of infusion phlebitis                                                           | Zheng, , GH, Yang, L, Chen, HY, Chu, JF; Mei, L                                                                                                                                                                                                                                   | 2014 |
| Adjuvant platinum-based chemotherapy for early stage cervical cancer                                                   | Falchetta, , FS, Medeiros, LRF, Edelweiss, MI, Pohlmann, PR, Stein, AT; Rosa, DD                                                                                                                                                                                                  | 2016 |
| Angiotensin-converting enzyme (ACE) inhibitors for proteinuria and microalbuminuria in people with sickle cell disease | Sasongko, , TH, Nagalla, S; Ballas, SK                                                                                                                                                                                                                                            | 2015 |
| Advance provision of emergency contraception for pregnancy prevention                                                  | Polis, , CB, Grimes, DA, Schaffer, K, Blanchard, K, Glasier, A; Harper, C                                                                                                                                                                                                         | 2007 |
| Amantadine and rimantadine for influenza A in children and the elderly                                                 | Alves Galvão, , MG, Rocha Crispino Santos, MA; Alves da Cunha, AJL                                                                                                                                                                                                                | 2014 |
| Anaesthetic interventions for prevention of awareness during surgery                                                   | Messina, , AG, Wang, M, Ward, MJ, Wilker, CC, Smith, BB, Vezina, DP; Pace, NL                                                                                                                                                                                                     | 2016 |
| Adjuvant progestagens for endometrial cancer                                                                           | Martin-Hirsch, , PPL, Bryant, A, Keep, SL, Kitchener, HC; Lilford, R                                                                                                                                                                                                              | 2011 |
| AD-8 for detection of dementia across a variety of healthcare settings                                                 | Hendry, , K, Green, C, McShane, R, Noel-Storr, AH, Stott, DJ, Anwer, S, Sutton, AJ, Burton, JK; Quinn, TJ                                                                                                                                                                         | 2019 |
| Advance misoprostol distribution for preventing and treating postpartum haemorrhage                                    | Oladapo, , OT, Fawole, B, Blum, J; Abalos, E                                                                                                                                                                                                                                      | 2012 |
| Allergen injection immunotherapy for seasonal allergic rhinitis                                                        | Calderon, , MA, Alves, B, Jacobson, M, Hurwitz, B, Sheikh, A; Durham, S                                                                                                                                                                                                           | 2007 |
| Aerobic exercise to improve cognitive function in older people without known cognitive impairment                      | Young, , J, Angevaren, M, Rusted, J; Tabet, N                                                                                                                                                                                                                                     | 2015 |
| Ambulatory oxygen for people with chronic obstructive pulmonary disease who are not hypoxaemic at rest                 | Ameer, , F, Carson, KV, Usmani, ZA; Smith, BJ                                                                                                                                                                                                                                     | 2014 |
| Adverse effects of biologics: a network meta-analysis and Cochrane overview                                            | Singh, , JA, Wells, GA, Christensen, R, Tanjong Ghogomu, E, Maxwell, LJ, MacDonald, JK, Filippini, G, Skoetz, N, Francis, DK, Lopes, LC, Guyatt, GH, Schmitt, J, La Mantia, L, Weberschock, T, Roos, JF, Siebert, H, Hershan, S, Cameron, C, Lunn, MPT, Tugwell, P; Buchbinder, R | 2011 |
| Altered dietary salt for preventing pre-eclampsia, and its complications                                               | Duley, , L, Henderson-Smart, DJ; Meher, S                                                                                                                                                                                                                                         | 2005 |
| alemtuzumab versus interferon beta 1a for relapsing-remitting multiple sclerosis                                       | Zhang, , J, Shi, S, Zhang, Y, Luo, J, Xiao, Y, Meng, L; Yang, X                                                                                                                                                                                                                   | 2017 |
| Almitrine-Raubasine combination for dementia                                                                           | Yang, , W, Liu, M, Teng, J, Hao, Z, Wu, B, Wu, T; Liu, GJ                                                                                                                                                                                                                         | 2011 |
| Alternative injectable materials for vocal fold medialisation in unilateral vocal fold paralysis                       | Lakhani, , R, Fishman, JM, Bleach, N, Costello, D; Birchall, M                                                                                                                                                                                                                    | 2012 |

|                                                                                                                                                                                           |                                                                                                                                 |      |
|-------------------------------------------------------------------------------------------------------------------------------------------------------------------------------------------|---------------------------------------------------------------------------------------------------------------------------------|------|
| Albendazole alone or in combination with microfilaricidal drugs for lymphatic filariasis                                                                                                  | Macfarlane, , CL, Budhathoki, SS, Johnson, S, Richardson, M; Garner, P                                                          | 2019 |
| Angiotensin converting enzyme inhibitors and angiotensin II receptor antagonists for preventing the progression of diabetic kidney disease                                                | Strippoli, , GFM, Bonifati, C, Craig, ME, Navaneethan, SD; Craig, JC                                                            | 2006 |
| Amitriptyline versus placebo for major depressive disorder                                                                                                                                | Leucht, , C, Huhn, M; Leucht, S                                                                                                 | 2012 |
| Allogeneic stem cell transplantation versus conventional therapy for advanced primary cutaneous T-cell lymphoma                                                                           | Schlaak, , M, Pickenhain, J, Theurich, S, Skoetz, N, von Bergwelt-Baildon, M; Kurschat, P                                       | 2013 |
| Adverse side effects of dexamethasone in surgical patients                                                                                                                                | Polderman, , JAW, Farhang-Razi, V, Van Dieren, S, Kranke, P, DeVries, JH, Hollmann, MW, Preckel, B; Hermanides, J               | 2018 |
| Alternative agents to prophylactic platelet transfusion for preventing bleeding in people with thrombocytopenia due to chronic bone marrow failure: a meta-analysis and systematic review | Desborough, , M, Hadjinicolaou, AV, Chaimani, A, Trivella, M, Vyas, P, Doree, C, Hopewell, S, Stanworth, SJ; Estcourt, LJ       | 2016 |
| Angioplasty versus stenting for subclavian artery stenosis                                                                                                                                | Iared, , W, Mourão, JE, Puchnick, A, Soma, F; Shigueoka, DC                                                                     | 2014 |
| Allergen-specific oral immunotherapy for peanut allergy                                                                                                                                   | Nurmatov, , U, Venderbosch, I, Devereux, G, Simons, FER; Sheikh, A                                                              | 2012 |
| Alprazolam for depression                                                                                                                                                                 | van Marwijk, , H, Allick, G, Wegman, F, Bax, A; Riphagen, II                                                                    | 2012 |
| Anabolic-androgenic steroids for alcoholic liver disease                                                                                                                                  | Rambaldi, , A; Glud, C                                                                                                          | 2006 |
| Advising patients to increase fluid intake for treating acute respiratory infections                                                                                                      | Guppy, , MPB, Mickan, SM, Del Mar, CB, Thorning, S; Rack, A                                                                     | 2011 |
| Aminoadamantanes for chronic hepatitis C                                                                                                                                                  | Lamers, , MH, Broekman, M, Drenth, JPH; Glud, C                                                                                 | 2014 |
| Alpha-1 proteinase inhibitor (a1PI) for preventing chronic lung disease in preterm infants                                                                                                | Shah, , PS; Ohlsson, A                                                                                                          | 2001 |
| Alpha-blockers as medical expulsive therapy for ureteral stones                                                                                                                           | Campschroer, , T, Zhu, X, Vernooij, RWM; Lock, MTWT                                                                             | 2018 |
| Alpha-fetoprotein and/or liver ultrasonography for screening of hepatocellular carcinoma in patients with chronic hepatitis B                                                             | Aghoram, , R, Cai, P; Dickinson, JA                                                                                             | 2012 |
| Airway physical examination tests for detection of difficult airway management in apparently normal adult patients                                                                        | Roth, , D, Pace, NL, Lee, A, Hovhannisyan, K, Warenits, AM, Arrich, J; Herkner, H                                               | 2018 |
| Amphotericin B lipid soluble formulations versus amphotericin B in cancer patients with neutropenia                                                                                       | Johansen, , HK; Göttsche, PC                                                                                                    | 2014 |
| Alexander technique for chronic asthma                                                                                                                                                    | Dennis, , JA; Cates, CJ                                                                                                         | 2012 |
| Adverse events in people taking macrolide antibiotics versus placebo for any indication                                                                                                   | Hansen, , MP, Scott, AM, McCullough, A, Thorning, S, Aronson, JK, Beller, EM, Glasziou, PP, Hoffmann, TC, Clark, J; Del Mar, CB | 2019 |
| Alternative magnesium sulphate regimens for women with pre-eclampsia and eclampsia                                                                                                        | Duley, , L, Matar, HE, Almerie, MQ; Hall, DR                                                                                    | 2010 |
| Alginate dressings for treating pressure ulcers                                                                                                                                           | Dumville, , JC, Keogh, SJ, Liu, Z, Stubbs, N, Walker, RM; Fortnam, M                                                            | 2015 |
| Aflibercept for neovascular age-related macular degeneration                                                                                                                              | Sarwar, , S, Clearfield, E, Soliman, MK, Sadiq, MA, Baldwin, AJ, Hanout, M, Agarwal, A, Sepah, YJ, Do, DV; Nguyen, QD           | 2016 |
| Anaesthetic regimens for day-procedure laparoscopic cholecystectomy                                                                                                                       | Vaughan, , J, Nagendran, M, Cooper, J, Davidson, BR; Gurusamy, KS                                                               | 2014 |
| Agomelatine versus other antidepressive agents for major depression                                                                                                                       | Guaiana, , G, Gupta, S, Chiodo, D, Davies, SJC, Haederle, K; Koesters, M                                                        | 2013 |
| Anakinra for rheumatoid arthritis                                                                                                                                                         | Mertens, , M; Singh, JA                                                                                                         | 2009 |
| Adrenaline (epinephrine) for the treatment of anaphylaxis with and without shock                                                                                                          | Sheikh, , A, Shehata, YA, Brown, SGA; Simons, FER                                                                               | 2008 |
| Aerosolized diuretics for preterm infants with (or developing) chronic lung disease                                                                                                       | Brion, , LP, Primhak, RA; Yong, W                                                                                               | 2006 |
| Alginate dressings for venous leg ulcers                                                                                                                                                  | O'Meara, , S, Martyn-St James, M; Adderley, UJ                                                                                  | 2015 |
| Alkylating agents for Waldenstrom's macroglobulinaemia                                                                                                                                    | Yang, , K, Tan, J; Wu, T                                                                                                        | 2009 |
| Ambulatory versus conventional methods for monitoring blood pressure during pregnancy                                                                                                     | Bergel, , E, Carroli, G; Althabe, F                                                                                             | 2002 |
| Altered dietary salt intake for preventing and treating diabetic kidney disease                                                                                                           | Suckling, , RJ, He, FJ; MacGregor, GA                                                                                           | 2010 |
| Angiotensin receptor blockers for heart failure                                                                                                                                           | Heran, , BS, Musini, VM, Bassett, K, Taylor, RS; Wright, JM                                                                     | 2012 |
| Angioplasty versus bare metal stenting for superficial femoral artery lesions                                                                                                             | Chowdhury, , MM, McLain, AD; Twine, CP                                                                                          | 2014 |
| Analgesia in patients with acute abdominal pain                                                                                                                                           | Manterola, , C, Vial, M, Moraga, J; Astudillo, P                                                                                | 2011 |
| Androgens (dehydroepiandrosterone or testosterone) for women undergoing assisted reproduction                                                                                             | Nagels, , HE, Rishworth, JR, Siristatidis, CS; Kroon, B                                                                         | 2015 |
| Alemtuzumab for multiple sclerosis                                                                                                                                                        | Riera, , R, Porfirio, GJM; Torloni, MR                                                                                          | 2016 |
| Aerobic physical exercise for adult patients with haematological malignancies                                                                                                             | Knips, , L, Bergenthal, N, Streckmann, F, Monsef, I, Elter, T; Skoetz, N                                                        | 2019 |
| Aspirin for vascular dementia                                                                                                                                                             | Rands, , G; Orrell, M                                                                                                           | 2000 |
| Artesunate versus quinine for treating severe malaria                                                                                                                                     | Sinclair, , D, Donegan, S, Isba, R; Lalloo, DG                                                                                  | 2012 |

|                                                                                                                                                                               |                                                                                                            |      |
|-------------------------------------------------------------------------------------------------------------------------------------------------------------------------------|------------------------------------------------------------------------------------------------------------|------|
| Ascorbic acid for the treatment of Charcot-Marie-Tooth disease                                                                                                                | Gess, , B, Baets, J, De Jonghe, P, Reilly, MM, Pareyson, D; Young, P                                       | 2015 |
| Aspirin and/or heparin for women with unexplained recurrent miscarriage with or without inherited thrombophilia                                                               | de Jong, , PG, Kaandorp, S, Di Nisio, M, Goddijn, M; Middeldorp, S                                         | 2014 |
| Ataluren and similar compounds (specific therapies for premature termination codon class I mutations) for cystic fibrosis                                                     | Aslam, , AA, Higgins, C, Sinha, IP; Southern, KW                                                           | 2017 |
| Antiretroviral regimens for patients with HIV who fail first-line antiretroviral therapy                                                                                      | Humphreys, , EH, Chang, LW; Harris, J                                                                      | 2010 |
| Anti-fibrinolytic use for minimising perioperative allogeneic blood transfusion                                                                                               | Henry, , DA, Carless, PA, Moxey, AJ, O'Connell, D, Stokes, BJ, Fergusson, DA; Ker, K                       | 2011 |
| Anti-GD2 antibody-containing immunotherapy postconsolidation therapy for people with high-risk neuroblastoma treated with autologous haematopoietic stem cell transplantation | Peinemann, , F, van Dalen, EC, Enk, H; Tytgat, GAM                                                         | 2019 |
| Artemisinin derivatives for treating severe malaria                                                                                                                           | McIntosh, , H; Olliaro, P                                                                                  | 1998 |
| Aripiprazole versus placebo for schizophrenia                                                                                                                                 | Belgamwar, , RB; El-Sayeh, HGG                                                                             | 2011 |
| Anti-leukotriene agents compared to inhaled corticosteroids in the management of recurrent and/or chronic asthma in adults and children                                       | Chauhan, , BF; Ducharme, FM                                                                                | 2012 |
| Antithrombotic treatment after stroke due to intracerebral haemorrhage                                                                                                        | Perry, , LA, Berge, E, Bowditch, J, Forfang, E, Rønning, OM, Hankey, GJ, Villanueva, E; Al-Shahi Salman, R | 2017 |
| Antiviral treatment for preventing postherpetic neuralgia                                                                                                                     | Chen, , N, Li, Q, Yang, J, Zhou, M, Zhou, D; He, L                                                         | 2014 |
| Aspirin, steroidal and non-steroidal anti-inflammatory drugs for the treatment of Alzheimer's disease                                                                         | Jaturapatporn, , D, Isaac, MGEKN, McCleery, J; Tabet, N                                                    | 2012 |
| Antivirals for idiopathic sudden sensorineural hearing loss                                                                                                                   | Awad, , Z, Huins, C; Pothier, DD                                                                           | 2012 |
| Anti-vascular endothelial growth factor for neovascular glaucoma                                                                                                              | Simha, , A, Braganza, A, Abraham, L, Samuel, P; Lindsley, K                                                | 2013 |
| Anti-IL-12/23p40 antibodies for induction of remission in Crohn's disease                                                                                                     | MacDonald, , JK, Nguyen, TM, Khanna, R; Timmer, A                                                          | 2016 |
| Aripiprazole for schizophrenia                                                                                                                                                | El-Sayeh, , HG; Morganti, C                                                                                | 2006 |
| Anti-hypertensive drugs as disease-modifying agents for Parkinson's disease: evidence from observational studies and clinical trials                                          | Rees, , K, Stowe, R, Patel, S, Ives, N, Breen, K, Ben-Shlomo, Y; Clarke, CE                                | 2011 |
| Aromatherapy for dementia                                                                                                                                                     | Forrester, , LT, Maayan, N, Orrell, M, Spector, AE, Buchan, LD; Soares-Weiser, K                           | 2014 |
| Anti-spasticity agents for multiple sclerosis                                                                                                                                 | Shakespeare, , D, Boggild, M; Young, CA                                                                    | 2003 |
| Anti-inflammatory medications for obstructive sleep apnea in children                                                                                                         | Kuhle, , S; Urschitz, MS                                                                                   | 2011 |
| Aripiprazole versus typical antipsychotic drugs for schizophrenia                                                                                                             | Bhattacharjee, , J; El-Sayeh, HG                                                                           | 2008 |
| Antithrombin for the prevention of intraventricular hemorrhage in very preterm infants                                                                                        | Bruschettini, , M, Romantsik, O, Zappettini, S, Banzi, R, Ramenghi, LA; Calevo, MG                         | 2016 |
| Audio-visual presentation of information for informed consent for participation in clinical trials                                                                            | Synnot, , A, Ryan, R, Prictor, M, Fetherstonhaugh, D; Parker, B                                            | 2014 |
| Aqueous shunts for glaucoma                                                                                                                                                   | Tseng, , VL, Coleman, AL, Chang, MY; Caprioli, J                                                           | 2017 |
| Anti-vascular endothelial growth factor for macular oedema secondary to branch retinal vein occlusion                                                                         | Mitry, , D, Bunce, C; Charteris, D                                                                         | 2013 |
| Antiretroviral post-exposure prophylaxis (PEP) for occupational HIV exposure                                                                                                  | Young, , T, Arens, FJ, Kennedy, GE, Laurie, JW; Rutherford, GW                                             | 2007 |
| Antiviral agents for infectious mononucleosis (glandular fever)                                                                                                               | De Paor, , M, O'Brien, K, Fahey, T; Smith, SM                                                              | 2016 |
| Antiretroviral therapy for prevention of HIV transmission in HIV-discordant couples                                                                                           | Anglemyer, , A, Rutherford, GW, Horvath, T, Baggaley, RC, Egger, M; Siegfried, N                           | 2013 |
| Appendectomy versus antibiotic treatment for acute appendicitis                                                                                                               | Wilms, , IMHA, de Hoog, DENM, de Visser, DC; Janzing, HMJ                                                  | 2011 |
| Antithyroid drug regimen for treating Graves' hyperthyroidism                                                                                                                 | Abraham, , P, Avenell, A, McGeoch, SC, Clark, LF; Bevan, JS                                                | 2010 |
| Antiviral prophylaxis for the prevention of chronic hepatitis C virus in patients undergoing liver transplantation                                                            | Gurusamy, , KS, Tsochatzis, E, Toon, CD, Davidson, BR; Burroughs, AK                                       | 2013 |
| Atorvastatin for lowering lipids                                                                                                                                              | Adams, , SP, Tsang, M; Wright, JM                                                                          | 2015 |
| Aripiprazole alone or in combination for acute mania                                                                                                                          | Brown, , R, Taylor, MJ; Geddes, J                                                                          | 2013 |
| Antithrombin for respiratory distress syndrome in preterm infants                                                                                                             | Bassler, , D, Millar, D; Schmidt, B                                                                        | 2006 |
| Antiviral interventions for liver transplant patients with recurrent graft infection due to hepatitis C virus                                                                 | Gurusamy, , KS, Tsochatzis, E, Toon, CD, Xirouchakis, E, Burroughs, AK; Davidson, BR                       | 2013 |
| Atypical antipsychotics for aggression and psychosis in Alzheimer's disease                                                                                                   | Ballard, , CG, Waite, J; Birks, J                                                                          | 2006 |
| Anti-histamines for prolonged non-specific cough in children                                                                                                                  | Chang, , AB, Peake, J; McElrea, MS                                                                         | 2008 |
| Aqueous shunts with mitomycin C versus aqueous shunts alone for glaucoma                                                                                                      | Foo, , VHX, Htoon, HM, Welsbie, DS; Perera, SA                                                             | 2019 |
| Antistaphylococcal immunoglobulins to prevent staphylococcal infection in very low birth weight infants                                                                       | Shah, , PS; Kaufman, DA                                                                                    | 2009 |
| Anti-vascular endothelial growth factor for proliferative diabetic retinopathy                                                                                                | Martinez-Zapata, , MJ, Martí-Carvajal, AJ, Solà, I, Pijoán, JI, Buil-Calvo, JA, Cordero, JA; Evans, JR     | 2014 |

|                                                                                                                                                 |                                                                                                        |      |
|-------------------------------------------------------------------------------------------------------------------------------------------------|--------------------------------------------------------------------------------------------------------|------|
| Anti-inflammatory drugs and analgesics for managing symptoms in people with cystic fibrosis-related arthritis                                   | Thornton, , J; Rangaraj, S                                                                             | 2016 |
| Anti-angiogenic therapies for metastatic colorectal cancer                                                                                      | Wagner, , ADADW, Arnold, D, Grothey, AAG, Haerting, J; Unverzagt, S                                    | 2009 |
| Anti-tuberculous therapy for maintenance of remission in Crohn's disease                                                                        | Patton, , PH, Parker, CE, MacDonald, JK; Chande, N                                                     | 2016 |
| Atrial natriuretic peptide for preventing and treating acute kidney injury                                                                      | Nigwekar, , SU, Navaneethan, SD, Parikh, CR; Hix, JK                                                   | 2009 |
| Anti-inflammatory treatment for carditis in acute rheumatic fever                                                                               | Cilliers, , A, Adler, AJ; Saloojee, H                                                                  | 2015 |
| Anti-IL5 therapies for asthma                                                                                                                   | Farne, , HA, Wilson, A, Powell, C, Bax, L; Milan, SJ                                                   | 2017 |
| Anti-D administration after childbirth for preventing Rhesus alloimmunisation                                                                   | Crowther, , CA; Middleton, P                                                                           | 1997 |
| Arthroplasties (with and without bone cement) for proximal femoral fractures in adults                                                          | Parker, , MJ, Gurusamy, KS; Azegami, S                                                                 | 2010 |
| Appetite stimulants for people with cystic fibrosis                                                                                             | Chinuck, , R, Dewar, J, Baldwin, DR; Hendron, E                                                        | 2014 |
| Antiviral agents for treatment of herpes simplex virus infection in neonates                                                                    | Jones, , CA, Walker, KS; Badawi, N                                                                     | 2009 |
| Arginine supplementation for prevention of necrotising enterocolitis in preterm infants                                                         | Shah, , PS, Shah, VS; Kelly, LE                                                                        | 2017 |
| Anti-D administration after spontaneous miscarriage for preventing Rhesus alloimmunisation                                                      | Karanth, , L, Jaafar, SH, Kanagasabai, S, Nair, NS; Barua, A                                           | 2013 |
| Antiviral treatment for Bell's palsy (idiopathic facial paralysis)                                                                              | Gagyor, , I, Madhok, VB, Daly, F; Sullivan, F                                                          | 2019 |
| Artemether for severe malaria                                                                                                                   | Esu, , EB, Effa, EE, Opie, ON; Meremikwu, MM                                                           | 2019 |
| Aquablation of the prostate for the treatment of lower urinary tract symptoms in men with benign prostatic hyperplasia                          | Hwang, , EC, Jung, JH, Borofsky, M, Kim, MH; Dahm, P                                                   | 2019 |
| Atherectomy for peripheral arterial disease                                                                                                     | Ambler, , GK, Radwan, R, Hayes, PD; Twine, CP                                                          | 2014 |
| Anti-TNF- $\alpha$ treatment for pelvic pain associated with endometriosis                                                                      | Lu, , D, Song, H; Shi, G                                                                               | 2013 |
| Antiretroviral therapy (ART) for treating HIV infection in ART-eligible pregnant women                                                          | Sturt, , AS, Dokubo, EK; Sint, TT                                                                      | 2010 |
| Assistive technology for memory support in dementia                                                                                             | Van der Roest, , HG, Wenborn, J, Pastink, C, Dröes, RM; Orrell, M                                      | 2017 |
| Atypical antipsychotics for disruptive behaviour disorders in children and youths                                                               | Loy, , JH, Merry, SN, Hetrick, SE; Stasiak, K                                                          | 2017 |
| Antiretrovirals for reducing the risk of mother-to-child transmission of HIV infection                                                          | Siegfried, , N, van der Merwe, L, Brocklehurst, P; Sint, TT                                            | 2011 |
| Antiretroviral pre-exposure prophylaxis (PrEP) for preventing HIV in high-risk individuals                                                      | Okwundu, , CI, Uthman, OA; Okoromah, CAN                                                               | 2012 |
| Aquatic exercise for the treatment of knee and hip osteoarthritis                                                                               | Bartels, , EM, Juhl, CB, Christensen, R, Hagen, KB, Danneskiold-Samsøe, B, Dagfinrud, H; Lund, H       | 2016 |
| Anti-vascular endothelial growth factor for choroidal neovascularisation in people with pathological myopia                                     | Zhu, , Y, Zhang, T, Xu, G; Peng, L                                                                     | 2016 |
| Aspirin as adjunctive treatment for giant cell arteritis                                                                                        | Mollan, , SP, Sharrack, N, Burdon, MA; Denniston, AK                                                   | 2014 |
| Arthroscopic debridement for knee osteoarthritis                                                                                                | Laupattarakasem, , W, Laopaiboon, M, Laupattarakasem, P; Sumananont, C                                 | 2008 |
| Anti-vascular endothelial growth factor for neovascular age-related macular degeneration                                                        | Solomon, , SD, Lindsley, K, Vedula, SS, Krzystolik, MG; Hawkins, BS                                    | 2019 |
| Atypical antipsychotics for psychosis in adolescents                                                                                            | Kumar, , A, Datta, SS, Wright, SD, Furtado, VA; Russell, PS                                            | 2013 |
| Antithrombotic drugs for carotid artery dissection                                                                                              | Lyrer, , P; Engelter, S                                                                                | 2010 |
| Anti-IgE therapy for allergic bronchopulmonary aspergillosis in people with cystic fibrosis                                                     | Jat, , KR, Walia, DK; Khairwa, A                                                                       | 2018 |
| Aromatase inhibitors (letrozole) for subfertile women with polycystic ovary syndrome                                                            | Franik, , S, Eltrop, SM, Kremer, JAM, Kiesel, L; Farquhar, C                                           | 2018 |
| Aromatase inhibitors for uterine fibroids                                                                                                       | Song, , H, Lu, D, Navaratnam, K; Shi, G                                                                | 2013 |
| Anti-angiogenic therapy for high-grade glioma                                                                                                   | Ameratunga, , M, Pavlakis, N, Wheeler, H, Grant, R, Simes, J; Khasraw, M                               | 2018 |
| Atypical antipsychotics for people with both schizophrenia and depression                                                                       | Furtado, , VA, Srihari, V; Kumar, A                                                                    | 2008 |
| Assisted reproductive technology: an overview of Cochrane Reviews                                                                               | Farquhar, , C; Marjoribanks, J                                                                         | 2018 |
| Artemisinin-based combination therapy for treating uncomplicated Plasmodium vivax malaria                                                       | Gogtay, , N, Kannan, S, Thatte, UM, Olhario, PL; Sinclair, D                                           | 2013 |
| Artificial corneas versus donor corneas for repeat corneal transplants                                                                          | Akpek, , EK, Alkharashi, M, Hwang, FS, Ng, SM; Lindsley, K                                             | 2014 |
| Assistive devices, hip precautions, environmental modifications and training to prevent dislocation and improve function after hip arthroplasty | Smith, , TO, Jepson, P, Beswick, A, Sands, G, Drummond, A, Davis, ET; Sackley, CM                      | 2016 |
| Anti-tumour necrosis factor biological therapies for the treatment of uveitic macular oedema (UMO) for non-infectious uveitis                   | Barry, , RJ, Tallouzi, MO, Bucknall, N, Mathers, JM, Murray, PI, Calvert, MJ, Moore, DJ; Denniston, AK | 2018 |

|                                                                                                                                                                                                       |                                                                                                                                  |      |
|-------------------------------------------------------------------------------------------------------------------------------------------------------------------------------------------------------|----------------------------------------------------------------------------------------------------------------------------------|------|
| Audit and feedback: effects on professional practice and healthcare outcomes                                                                                                                          | Ivers, , N, Jamtvedt, G, Flottorp, S, Young, JM, Odgaard-Jensen, J, French, SD, O'Brien, MA, Johansen, M, Grimshaw, J; Oxman, AD | 2012 |
| Antistreptococcal interventions for guttate and chronic plaque psoriasis                                                                                                                              | Dupire, , G, Droitcourt, C, Hughes, C; Le Cleach, L                                                                              | 2019 |
| Anti-vascular endothelial growth factor for macular oedema secondary to central retinal vein occlusion                                                                                                | Braithwaite, , T, Nanji, AA, Lindsley, K; Greenberg, PB                                                                          | 2014 |
| Artemisinin-based combination therapy for treating uncomplicated malaria                                                                                                                              | Sinclair, , D, Zani, B, Donegan, S, Olliaro, P; Garner, P                                                                        | 2009 |
| Aripiprazole versus other atypical antipsychotics for schizophrenia                                                                                                                                   | Khanna, , P, Suo, T, Komossa, K, Ma, H, Rummel-Kluge, C, El-Sayeh, HG, Leucht, S; Xia, J                                         | 2014 |
| Art therapy for people with dementia                                                                                                                                                                  | Deshmukh, , SR, Holmes, J; Cardno, A                                                                                             | 2018 |
| Anti-vascular endothelial growth factor for prevention of postoperative vitreous cavity haemorrhage after vitrectomy for proliferative diabetic retinopathy                                           | Smith, , JM; Steel, DHW                                                                                                          | 2015 |
| Anti-vascular endothelial growth factor for control of wound healing in glaucoma surgery                                                                                                              | Cheng, , JW, Cheng, SW, Wei, RL; Lu, GC                                                                                          | 2016 |
| Anti-vascular endothelial growth factor for diabetic macular oedema: a network meta-analysis                                                                                                          | Virgili, , G, Parravano, M, Evans, JR, Gordon, I; Lucenteforte, E                                                                | 2018 |
| Behavioral interventions to promote condom use among women living with HIV                                                                                                                            | Carvalho, , FT, Gonçalves, TR, Faria, ER, Shoveller, JA, Piccinini, CA, Ramos, MC; Medeiros, LRF                                 | 2011 |
| Beclometasone for chronic obstructive pulmonary disease                                                                                                                                               | De Coster, , DA, Jones, M; Thakrar, N                                                                                            | 2013 |
| Biologics for rheumatoid arthritis: an overview of Cochrane reviews                                                                                                                                   | Singh, , JA, Christensen, R, Wells, GA, Suarez-Almazor, ME, Buchbinder, R, Lopez-Olivo, MA, Tanjong Ghogomu, E; Tugwell, P       | 2009 |
| Bile acids for viral hepatitis                                                                                                                                                                        | Chen, , W, Liu, JP; Glud, C                                                                                                      | 2007 |
| Back schools for acute and subacute non-specific low-back pain                                                                                                                                        | Poquet, , N, Lin, CWC, Heymans, MW, van Tulder, MW, Esmail, R, Koes, BW; Maher, CG                                               | 2016 |
| Biologics or tofacitinib for rheumatoid arthritis in incomplete responders to methotrexate or other traditional disease-modifying anti-rheumatic drugs: a systematic review and network meta-analysis | Singh, , JA, Hossain, A, Tanjong Ghogomu, E, Kotb, A, Christensen, R, Mudano, AS, Maxwell, LJ, Shah, NP, Tugwell, P; Wells, GA   | 2016 |
| Behavioural and cognitive-behavioural interventions for outwardly-directed aggressive behaviour in people with intellectual disabilities                                                              | Ali, , A, Hall, I, Blickwedel, J; Hassiotis, A                                                                                   | 2015 |
| Bezafibrate for primary biliary cirrhosis                                                                                                                                                             | Rudic, , JS, Poropat, G, Krstic, MN, Bjelakovic, G; Glud, C                                                                      | 2012 |
| Biofeedback for pain management during labour                                                                                                                                                         | Barragán Loayza, , IM, Solà, I; Juandó Prats, C                                                                                  | 2011 |
| Bendamustine for patients with indolent B cell lymphoid malignancies including chronic lymphocytic leukaemia                                                                                          | Vidal, , L, Gafter-Gvili, A, Gurion, R, Raanani, P, Dreyling, M; Shpilberg, O                                                    | 2012 |
| Beta-blockers for preventing aortic dissection in Marfan syndrome                                                                                                                                     | Koo, , HK, Lawrence, KAK; Musini, VM                                                                                             | 2017 |
| Benzodiazepines for neuroleptic-induced acute akathisia                                                                                                                                               | Resende Lima, , A, Soares-Weiser, K, Bacaltchuk, J; Barnes, TRE                                                                  | 1999 |
| Beta2-agonists for acute cough or a clinical diagnosis of acute bronchitis                                                                                                                            | Becker, , LA, Hom, J, Villasis-Keever, M; van der Wouden, JC                                                                     | 2015 |
| Betamimetics for inhibiting preterm labour                                                                                                                                                            | Neilson, , JP, West, HM; Dowswell, T                                                                                             | 2014 |
| Azathioprine or 6-mercaptopurine for maintenance of remission in Crohn's disease                                                                                                                      | Chande, , N, Patton, PH, Tsoulis, DJ, Thomas, BS; MacDonald, JK                                                                  | 2015 |
| Baclofen for alcohol withdrawal                                                                                                                                                                       | Liu, , J; Wang, LN                                                                                                               | 2017 |
| Betahistine for symptoms of vertigo                                                                                                                                                                   | Murdin, , L, Hussain, K; Schilder, AGM                                                                                           | 2016 |
| Auranofin versus placebo in rheumatoid arthritis                                                                                                                                                      | Suarez-Almazor, , ME, Spooner, C, Belseck, E; Shea, B                                                                            | 2000 |
| Bicyclol for chronic hepatitis B                                                                                                                                                                      | Wu, , T, Xie, L, Liu, GJ, Hao, B; Harrison, RA                                                                                   | 2006 |
| Beta-blockers and inhibitors of the renin-angiotensin aldosterone system for chronic heart failure with preserved ejection fraction                                                                   | Martin, , N, Manoharan, K, Thomas, J, Davies, C; Lumbers, RT                                                                     | 2018 |
| Back schools for non-specific low-back pain.                                                                                                                                                          | Heymans, , MW, van Tulder, MW, Esmail, R, Bombardier, C; Koes, BW                                                                | 2004 |
| Ayurvedic treatments for diabetes mellitus                                                                                                                                                            | Sridharan, , K, Mohan, R, Ramaratnam, S; Panneerselvam, D                                                                        | 2011 |
| Back Schools for chronic non-specific low back pain                                                                                                                                                   | Parreira, , P, Heymans, MW, van Tulder, MW, Esmail, R, Koes, BW, Poquet, N, Lin, CWC; Maher, CG                                  | 2017 |
| Autologous serum eye drops for dry eye                                                                                                                                                                | Pan, , Q, Angelina, A, Marrone, M, Stark, WJ; Akpek, EK                                                                          | 2017 |
| Barriers and facilitators to the implementation of lay health worker programmes to improve access to maternal and child health: a qualitative evidence synthesis                                      | Glenton, , C, Colvin, CJ, Carlsen, B, Swartz, A, Lewin, S, Noyes, J; Rashidian, A                                                | 2013 |
| Behavioural and cognitive-behavioural group-based parenting programmes for early-onset conduct problems in children aged 3 to 12 years                                                                | Furlong, , M, McGilloway, S, Bywater, T, Hutchings, J, Smith, SM; Donnelly, M                                                    | 2012 |
| Behavioral interventions for improving dual-method contraceptive use                                                                                                                                  | Lopez, , LM, Stockton, LL, Chen, M, Steiner, MJ; Gallo, MF                                                                       | 2014 |
| Azithromycin versus penicillin G benzathine for early syphilis                                                                                                                                        | Bai, , ZG, Wang, B, Yang, K, Tian, JH, Ma, B, Liu, Y, Jiang, L, Gai, QY, He, X; Li, Y                                            | 2012 |

|                                                                                                                                                                                                             |                                                                                                                     |      |
|-------------------------------------------------------------------------------------------------------------------------------------------------------------------------------------------------------------|---------------------------------------------------------------------------------------------------------------------|------|
| Band ligation versus no intervention for primary prevention of upper gastrointestinal bleeding in adults with cirrhosis and oesophageal varices                                                             | Vadera, , S, Yong, CWK, Gluud, LL; Morgan, MY                                                                       | 2019 |
| Autologous hematopoietic stem cell transplantation following high-dose chemotherapy for nonrhabdomyosarcoma soft tissue sarcomas                                                                            | Peinemann, , F, Enk, H; Smith, LA                                                                                   | 2017 |
| Beclomethasone for asthma in children: effects on linear growth                                                                                                                                             | Sharek, , PJ, Bergman, D; Ducharme, FM                                                                              | 1999 |
| Beta-blockers for preventing stroke recurrence                                                                                                                                                              | De Lima, , LG, Saconato, H, Atallah, ÁN; da Silva, EMK                                                              | 2014 |
| Beclomethasone at different doses for chronic asthma                                                                                                                                                        | Adams, , NP, Bestall, JC; Jones, P                                                                                  | 1999 |
| Bed rest during pregnancy for preventing miscarriage                                                                                                                                                        | Aleman, , A, Althabe, F, Belizán, JM; Bergel, E                                                                     | 2005 |
| Biofeedback and/or sphincter exercises for the treatment of faecal incontinence in adults                                                                                                                   | Norton, , C; Cody, JD                                                                                               | 2012 |
| Bicarbonate- versus lactate-buffered solutions for acute continuous haemodiafiltration or haemofiltration                                                                                                   | Tian, , JH, Ma, B, Yang, K, Liu, Y, Tan, J; Liu, TX                                                                 | 2015 |
| Behavioural and cognitive interventions with or without other treatments for the management of faecal incontinence in children                                                                              | Brazzelli, , M, Griffiths, PV, Cody, JD; Tappin, D                                                                  | 2011 |
| Beta-blockers for prevention and treatment of retinopathy of prematurity in preterm infants                                                                                                                 | Kaempfen, , S, Neumann, RP, Jost, K; Schulzke, SM                                                                   | 2018 |
| Beta-blocker supplementation of standard drug treatment for schizophrenia                                                                                                                                   | Shek, , E, Bardhan, S, Cheine, MV, Ahonen, J; Wahlbeck, K                                                           | 2001 |
| Bed rest for pressure ulcer healing in wheelchair users                                                                                                                                                     | Moore, , ZEH, van Etten, MT; Dumville, JC                                                                           | 2016 |
| Beta-blockers for congestive heart failure in children                                                                                                                                                      | Alabed, , S, Sabouni, A, Al Dakhoul, S, Bdaiwi, Y; Frobel-Mercier, AK                                               | 2016 |
| Benzodiazepines for restless legs syndrome                                                                                                                                                                  | Carlos, , K, Prado, GF, Teixeira, CDM, Conti, C, de Oliveira, MM, Prado, LBF; Carvalho, LBC                         | 2017 |
| Autogenic drainage for airway clearance in cystic fibrosis                                                                                                                                                  | McCormack, , P, Burnham, P; Southern, KW                                                                            | 2017 |
| Banding ligation versus beta-blockers for primary prevention in oesophageal varices in adults                                                                                                               | Gluud, , LL; Krag, A                                                                                                | 2012 |
| Behavioral interventions for improving condom use for dual protection                                                                                                                                       | Lopez, , LM, Otterness, C, Chen, M, Steiner, M; Gallo, MF                                                           | 2013 |
| Bioidentical hormones for women with vasomotor symptoms                                                                                                                                                     | Gaudard, , AMIS, Silva de Souza, S, Puga, MES, Marjoribanks, J, da Silva, EMK; Torloni, MR                          | 2016 |
| Beta-blockers for hypertension                                                                                                                                                                              | Wysong, , CS, Bradley, HA, Volmink, J, Mayosi, BM; Opie, LH                                                         | 2017 |
| Belatacept for kidney transplant recipients                                                                                                                                                                 | Masson, , P, Henderson, L, Chapman, JR, Craig, JC; Webster, AC                                                      | 2014 |
| Azithromycin for acute lower respiratory tract infections                                                                                                                                                   | Laopaiboon, , M, Panpanich, R; Swa Mya, K                                                                           | 2015 |
| Azathioprine for primary biliary cirrhosis                                                                                                                                                                  | Gong, , Y, Christensen, E; Gluud, C                                                                                 | 2007 |
| Barbiturates for acute traumatic brain injury                                                                                                                                                               | Roberts, , I; Sydenham, E                                                                                           | 2012 |
| Betamimetics for suspected impaired fetal growth                                                                                                                                                            | Say, , L, Gülmezoglu, AM; Hofmeyr, GJ                                                                               | 2001 |
| Balneotherapy for osteoarthritis                                                                                                                                                                            | Verhagen, , AP, Bierma-Zeinstra, SMA, Boers, M, Cardoso, JR, Lambeck, J, de Bie, R; de Vet, HCW                     | 2007 |
| Betahistine for Ménière's disease or syndrome                                                                                                                                                               | James, , A; Burton, MJ                                                                                              | 2001 |
| Benzo-pyrones for reducing and controlling lymphoedema of the limbs                                                                                                                                         | Badger, , CMA, Preston, NJ, Seers, K; Mortimer, PS                                                                  | 2004 |
| Azathioprine as an oral corticosteroid sparing agent for asthma                                                                                                                                             | Dean, , TP, Dewey, A, Bara, A, Lasserson, TJ; Walters, EH                                                           | 2003 |
| Benzodiazepines for schizophrenia                                                                                                                                                                           | Dold, , M, Li, C, Tardy, M, Khorsand, V, Gillies, D; Leucht, S                                                      | 2012 |
| Bed rest in hospital for suspected impaired fetal growth                                                                                                                                                    | Say, , L, Gülmezoglu, AM; Hofmeyr, GJ                                                                               | 1996 |
| Balneotherapy for chronic venous insufficiency                                                                                                                                                              | de Moraes Silva, , MA, Nakano, LCU, Cisneros, LL; Miranda Jr, F                                                     | 2019 |
| Biologic or tofacitinib monotherapy for rheumatoid arthritis in people with traditional disease-modifying anti-rheumatic drug (DMARD) failure: a Cochrane Systematic Review and network meta-analysis (NMA) | Singh, , JA, Hossain, A, Tanjong Ghogomu, E, Mudano, AS, Tugwell, P; Wells, GA                                      | 2016 |
| Biomarkers as point-of-care tests to guide prescription of antibiotics in patients with acute respiratory infections in primary care                                                                        | Aabenhuis, , R, Jensen, JUS, Jørgensen, KJ, Hróbjartsson, A; Bjerrum, L                                             | 2014 |
| Beclomethasone versus budesonide for chronic asthma                                                                                                                                                         | Adams, , NP, Bestall, JC; Jones, P                                                                                  | 2002 |
| Bile acids for liver-transplanted patients                                                                                                                                                                  | Poropat, , G, Giljaca, V, Stimac, D; Gluud, C                                                                       | 2010 |
| Beta2-agonists for exercise-induced asthma                                                                                                                                                                  | Bonini, , M, Di Mambro, C, Calderon, MA, Compalati, E, Schünemann, H, Durham, S; Canonica, GW                       | 2013 |
| Biomedical risk assessment as an aid for smoking cessation                                                                                                                                                  | Clair, , C, Mueller, Y, Livingstone-Banks, J, Burnand, B, Camain, JY, Cornuz, J, Rége-Walther, M, Selby, K; Bize, R | 2019 |
| Bariatric surgery for non-alcoholic steatohepatitis in obese patients                                                                                                                                       | Chavez-Tapia, , NC, Tellez-Avila, FI, Barrientos-Gutierrez, T, Mendez-Sanchez, N, Lizardi-Cervera, J; Uribe, M      | 2010 |
| Bed rest with or without hospitalisation for hypertension during pregnancy                                                                                                                                  | Meher, , S, Abalos, E; Carroli, G                                                                                   | 2005 |
| Bed rest with and without hospitalisation in multiple pregnancy for improving perinatal outcomes                                                                                                            | da Silva Lopes, , K, Takemoto, Y, Ota, E, Tanigaki, S; Mori, R                                                      | 2017 |

|                                                                                                                                                                          |                                                                                                                                                                                         |      |
|--------------------------------------------------------------------------------------------------------------------------------------------------------------------------|-----------------------------------------------------------------------------------------------------------------------------------------------------------------------------------------|------|
| Automated weaning and spontaneous breathing trial systems versus non-automated weaning strategies for discontinuation time in invasively ventilated postoperative adults | Burns, , KEA, Lellouche, F, Lessard, MR; Friedrich, JO                                                                                                                                  | 2014 |
| Automated weaning and SBT systems versus non-automated weaning strategies for weaning time in invasively ventilated critically ill adults                                | Burns, , KEA, Lellouche, F, Nisenbaum, R, Lessard, MR; Friedrich, JO                                                                                                                    | 2014 |
| Biologics, colchicine, corticosteroids, immunosuppressants and interferon-alpha for Neuro-Behçet's Syndrome                                                              | Nava, , F, Ghilotti, F, Maggi, L, Hatemi, G, Del Bianco, A, Merlo, C, Filippini, G; Tramacere, I                                                                                        | 2014 |
| Azathioprine for treating rheumatoid arthritis                                                                                                                           | Suarez-Almazor, , ME, Spooner, C; Belseck, E                                                                                                                                            | 2000 |
| Bile acids for non-alcoholic fatty liver disease and/or steatohepatitis                                                                                                  | Orlando, , R, Azzalini, L, Orando, S; Lirussi, F                                                                                                                                        | 2007 |
| Betahistine for tinnitus                                                                                                                                                 | Wegner, , I, Hall, DA, Smit, AL, McFerran, D; Stegeman, I                                                                                                                               | 2018 |
| Behavioral interventions to reduce the transmission of HIV infection among sex workers and their clients in low- and middle-income countries                             | Wariki, , WMV, Ota, E, Mori, R, Koyanagi, A, Hori, N; Shibuya, K                                                                                                                        | 2012 |
| Baclofen for alcohol use disorder                                                                                                                                        | Minozzi, , S, Saulle, R; Rösner, S                                                                                                                                                      | 2018 |
| Barriers and facilitators to the implementation of doctor-nurse substitution strategies in primary care: a qualitative evidence synthesis                                | Karimi-Shahanjari, , A, Shakibazadeh, E, Rashidian, A, Hajimiri, K, Glenton, C, Noyes, J, Lewin, S, Laurant, M; Colvin, CJ                                                              | 2019 |
| Autologous platelet-rich plasma for treating chronic wounds                                                                                                              | Martinez-Zapata, , MJ, Marti-Carvajal, AJ, Solà, I, Expósito, JA, Bolívar, I, Rodríguez, L, Garcia, J; Zaror, C                                                                         | 2016 |
| Automated mandatory bolus versus basal infusion for maintenance of epidural analgesia in labour                                                                          | Sng, , BL, Zeng, Y, de Souza, NNA, Leong, WL, Oh, TT, Siddiqui, FJ, Assam, PN, Han, NLR, Chan, ESY; Sia, AT                                                                             | 2018 |
| Beta2-adrenoceptor agonists for dysmenorrhoea                                                                                                                            | Fedorowicz, , Z, Nasser, M, Jagannath, VA, Beaman, JH, Ejaz, K; van Zuuren, EJ                                                                                                          | 2012 |
| Azithromycin for treating uncomplicated malaria                                                                                                                          | van Eijk, , AM; Terlouw, DJ                                                                                                                                                             | 2011 |
| Biochemical tests of placental function for assessment in pregnancy                                                                                                      | Neilson, JP                                                                                                                                                                             | 2012 |
| Bicarbonate versus lactate solutions for acute peritoneal dialysis                                                                                                       | Bai, , ZG, Yang, K, Tian, JH, Ma, B, Liu, Y, Jiang, L, Tan, J, Liu, TX; Chi, I                                                                                                          | 2014 |
| Automated telephone communication systems for preventive healthcare and management of long-term conditions                                                               | Posadzki, , P, Mastellos, N, Ryan, R, Gunn, LH, Felix, LM, Pappas, Y, Gagnon, MP, Julious, SA, Xiang, L, Oldenburg, B; Car, J                                                           | 2016 |
| Biocompatible hemodialysis membranes for acute renal failure                                                                                                             | Alonso, , A, Lau, J; Jaber, BL                                                                                                                                                          | 2008 |
| Bile acids for primary sclerosing cholangitis                                                                                                                            | Poropat, , G, Giljaca, V, Stimac, D; Glud, C                                                                                                                                            | 2011 |
| Auricular acupuncture for cocaine dependence                                                                                                                             | Gates, , S, Smith, LA; Foxcroft, D                                                                                                                                                      | 2006 |
| Azathioprine and 6-mercaptopurine for maintenance of surgically-induced remission in Crohn's disease                                                                     | Gjulaadin-Hellon, , T, Iheozor-Ejiofor, Z, Gordon, M; Akobeng, AK                                                                                                                       | 2019 |
| Azathioprine or 6-mercaptopurine for induction of remission in Crohn's disease                                                                                           | Chande, , N, Townsend, CM, Parker, CE; MacDonald, JK                                                                                                                                    | 2016 |
| Benzodiazepines versus placebo for panic disorder in adults                                                                                                              | Breilmann, , J, Girlanda, F, Guaiana, G, Barbui, C, Cipriani, A, Castellazzi, M, Bighelli, I, Davies, SJC, Furukawa, TA; Koesters, M                                                    | 2019 |
| Fluoride supplementation (with tablets, drops, lozenges or chewing gum) in pregnant women for preventing dental caries in the primary teeth of their children            | Takahashi, , R, Ota, E, Hoshi, K, Naito, T, Toyoshima, Y, Yuasa, H, Mori, R; Nango, E                                                                                                   | 2017 |
| First trimester serum tests for Down's syndrome screening                                                                                                                | Allred, , SK, Takwoingi, Y, Guo, B, Pennant, M, Deeks, JJ, Neilson, JP; Alfirevic, Z                                                                                                    | 2015 |
| Face-to-face interventions for promoting physical activity                                                                                                               | Richards, , J, Hillsdon, M, Thorogood, M; Foster, C                                                                                                                                     | 2013 |
| Face-to-face versus remote and web 2.0 interventions for promoting physical activity                                                                                     | Richards, , J, Thorogood, M, Hillsdon, M; Foster, C                                                                                                                                     | 2013 |
| Fluoride for treating postmenopausal osteoporosis                                                                                                                        | Haguenauer, , D, Shea, B, Tugwell, P, Wells, GA; Welch, V                                                                                                                               | 2000 |
| Exercises for mechanical neck disorders                                                                                                                                  | Gross, , A, Kay, TM, Paquin, JP, Blanchette, S, Lalonde, P, Christie, T, Dupont, G, Graham, N, Burnie, SJ, Gelley, G, Goldsmith, CH, Forget, M, Hoving, JL, Brønfort, G; Santaguida, PL | 2015 |
| Fluticasone at different doses for chronic asthma in adults and children                                                                                                 | Adams, , NP, Bestall, JC, Jones, P, Lasserson, TJ, Griffiths, B; Cates, CJ                                                                                                              | 2008 |
| First rank symptoms for schizophrenia                                                                                                                                    | Soares-Weiser, , K, Maayan, N, Bergman, H, Davenport, C, Kirkham, AJ, Grabowski, S; Adams, CE                                                                                           | 2015 |
| Fluid and pharmacological agents for adhesion prevention after gynaecological surgery                                                                                    | Ahmad, , G, Mackie, FL, Iles, DA, O'Flynn, H, Dias, S, Metwally, M; Watson, A                                                                                                           | 2014 |
| Exercise-based cardiac rehabilitation for adults after heart valve surgery                                                                                               | Sibiltz, , KL, Berg, SK, Tang, LH, Risom, SS, Glud, C, Lindschou, J, Kober, L, Hassager, C, Taylor, RS; Zwisler, AD                                                                     | 2016 |
| Enteral lactoferrin for the treatment of sepsis and necrotizing enterocolitis in neonates                                                                                | Pammi, , M; Abrams, SA                                                                                                                                                                  | 2019 |
| Excisional surgery versus ablative surgery for ovarian endometriomata                                                                                                    | Hart, , RJ, Hickey, M, Maouris, P; Buckett, W                                                                                                                                           | 2008 |
| Enteral iron supplementation in preterm and low birth weight infants                                                                                                     | Mills, , RJ; Davies, MW                                                                                                                                                                 | 2012 |
| Erythropoiesis-stimulating agents for anaemia in chronic heart failure patients                                                                                          | Ngo, , K, Kotecha, D, Walters, JAE, Manzano, L, Palazzuoli, A, van Veldhuisen, DJ; Flather, M                                                                                           | 2010 |



|                                                                                                                                                                  |                                                                                                                          |      |
|------------------------------------------------------------------------------------------------------------------------------------------------------------------|--------------------------------------------------------------------------------------------------------------------------|------|
| Exercise interventions for upper-limb dysfunction due to breast cancer treatment                                                                                 | McNeely, , ML, Campbell, K, Ospina, M, Rowe, BH, Dabbs, K, Klassen, TP, Mackey, J; Courneya, K                           | 2010 |
| Extracorporeal photopheresis versus standard treatment for acute graft-versus-host disease after haematopoietic stem cell transplantation in paediatric patients | Weitz, , M, Strahm, B, Meerpohl, JJ, Schmidt, M; Bassler, D                                                              | 2015 |
| Eradication therapy for Burkholderia cepacia complex in people with cystic fibrosis                                                                              | Regan, , KH; Bhatt, J                                                                                                    | 2019 |
| Enzyme replacement therapy with idursulfase for mucopolysaccharidosis type II (Hunter syndrome)                                                                  | da Silva, , EMK, Strufaldi, MWL, Andriolo, RB; Silva, LA                                                                 | 2016 |
| Exercise for the management of cancer-related fatigue in adults                                                                                                  | Cramp, , F; Byron-Daniel, J                                                                                              | 2012 |
| Fluoropyrimidine-HAI (hepatic arterial infusion) versus systemic chemotherapy (SCT) for unresectable liver metastases from colorectal cancer                     | Mocellin, , S, Pasquali, S; Nitti, D                                                                                     | 2009 |
| Finasteride for benign prostatic hyperplasia                                                                                                                     | Tacklind, , J, Fink, HA, MacDonald, R, Rutks, I; Wilt, TJ                                                                | 2010 |
| Exercise for diabetic pregnant women                                                                                                                             | Ceysens, , G, Rouiller, D; Boulvain, M                                                                                   | 2006 |
| Feedback or biofeedback to augment pelvic floor muscle training for urinary incontinence in women                                                                | Herderschee, , R, Hay-Smith, EJC, Herbison, GP, Roovers, JP; Heineman, MJ                                                | 2011 |
| Estrogen for schizophrenia                                                                                                                                       | Chua, , WLLC, Izquierdo de Santiago, A, Kulkarni, J; Mortimer, A                                                         | 2005 |
| Family-based programmes for preventing smoking by children and adolescents                                                                                       | Thomas, , RE, Baker, PRA, Thomas, BC; Lorenzetti, DL                                                                     | 2015 |
| Enteral nutrition formulations for acute pancreatitis                                                                                                            | Poropat, , G, Giljaca, V, Hauser, G; Štimac, D                                                                           | 2015 |
| Exercise-based cardiac rehabilitation for people with implantable ventricular assist devices                                                                     | Yamamoto, , S, Hotta, K, Ota, E, Matsunaga, A; Mori, R                                                                   | 2018 |
| Exercise for intermittent claudication                                                                                                                           | Lane, , R, Harwood, A, Watson, L; Leng, GC                                                                               | 2017 |
| Flupenthixol versus low-potency first-generation antipsychotic drugs for schizophrenia                                                                           | Tardy, , M, Dold, M, Engel, RR; Leucht, S                                                                                | 2014 |
| Excimer laser refractive surgery versus phakic intraocular lenses for the correction of moderate to high myopia                                                  | Barsam, , A; Allan, BDS                                                                                                  | 2014 |
| Exercise training for adults with chronic kidney disease                                                                                                         | Heiwe, , S; Jacobson, SH                                                                                                 | 2011 |
| Fluoride mouthrinses for preventing dental caries in children and adolescents                                                                                    | Marinho, , VCC, Chong, LY, Worthington, HV; Walsh, T                                                                     | 2016 |
| Flumazenil versus placebo or no intervention for people with cirrhosis and hepatic encephalopathy                                                                | Goh, , ET, Andersen, ML, Morgan, MY; Gluud, LL                                                                           | 2017 |
| Exercise therapy for fatigue in multiple sclerosis                                                                                                               | Heine, , M, van de Port, I, Rietberg, MB, van Wegen, EEH; Kwakkel, G                                                     | 2015 |
| Exercise interventions on health-related quality of life for cancer survivors                                                                                    | Mishra, , SI, Scherer, RW, Geigle, PM, Berlanstein, DR, Topaloglu, O, Gotay, CC; Snyder, C                               | 2012 |
| Erythromycin for the prevention and treatment of feeding intolerance in preterm infants                                                                          | Ng, , E; Shah, VS                                                                                                        | 2008 |
| Flow-regulated versus differential pressure-regulated shunt valves for adult patients with normal pressure hydrocephalus                                         | Ziebell, , M, Wetterslev, J, Tisell, M, Gluud, C; Juhler, M                                                              | 2013 |
| Exenterative surgery for recurrent gynaecological malignancies                                                                                                   | Ang, , C, Bryant, A, Barton, DPJ, Pomel, C; Naik, R                                                                      | 2014 |
| Etidronate for the primary and secondary prevention of osteoporotic fractures in postmenopausal women                                                            | Wells, , GA, Cranney, A, Peterson, J, Boucher, M, Shea, B, Welch, V, Coyle, D; Tugwell, P                                | 2008 |
| Enzyme replacement and substrate reduction therapy for Gaucher disease                                                                                           | Shemesh, , E, Deroma, L, Bembi, B, Deegan, P, Hollak, C, Weinreb, NJ; Cox, TM                                            | 2015 |
| Exhaled nitric oxide levels to guide treatment for adults with asthma                                                                                            | Petsky, , HL, Kew, KM, Turner, C; Chang, AB                                                                              | 2016 |
| Exercise for osteoarthritis of the hip                                                                                                                           | Fransen, , M, McConnell, S, Hernandez-Molina, G; Reichenbach, S                                                          | 2014 |
| Fluvastatin for lowering lipids                                                                                                                                  | Adams, , SP, Sekhon, SS, Tsang, M; Wright, JM                                                                            | 2018 |
| Eversion versus conventional carotid endarterectomy for preventing stroke                                                                                        | Cao, , P, De Rango, P, Zannetti, S, Giordano, G, Ricci, S; Celani, MG                                                    | 2000 |
| Environmental interventions to reduce the consumption of sugar-sweetened beverages and their effects on health                                                   | von Philipsborn, , P, Stratil, JM, Burns, J, Busert, LK, Pfadenhauer, LM, Polus, S, Holzapfel, C, Hauner, H; Rehfuess, E | 2019 |
| Fluvoxamine versus other anti-depressive agents for depression                                                                                                   | Omori, , IM, Watanabe, N, Nakagawa, A, Cipriani, A, Barbui, C, McGuire, H, Churchill, R; Furukawa, TA                    | 2010 |
| Feverfew for preventing migraine                                                                                                                                 | Wider, , B, Pittler, MH; Ernst, E                                                                                        | 2015 |
| Exercise versus no exercise for the occurrence, severity and duration of acute respiratory infections                                                            | Grande, , AJ, Keogh, J, Hoffmann, TC, Beller, EM; Del Mar, CB                                                            | 2015 |
| Enteral versus parenteral nutrition for acute pancreatitis                                                                                                       | Al-Omran, , M, AlBalawi, ZH, Tashkandi, MF; Al-Ansary, LA                                                                | 2010 |
| Epidural local anaesthetics versus opioid-based analgesic regimens for postoperative gastrointestinal paralysis, vomiting and pain after abdominal surgery       | Guay, , J, Nishimori, M; Kopp, S                                                                                         | 2016 |
| Flupenthixol versus placebo for schizophrenia                                                                                                                    | Shen, , X, Xia, J; Adams, CE                                                                                             | 2012 |
| Epinephrine injection versus epinephrine injection and a second endoscopic method in high-risk bleeding ulcers                                                   | Vergara, , M, Bennett, C, Calvet, X; Gisbert, JP                                                                         | 2014 |

|                                                                                                                                                                                 |                                                                                                                         |      |
|---------------------------------------------------------------------------------------------------------------------------------------------------------------------------------|-------------------------------------------------------------------------------------------------------------------------|------|
| Exercise training undertaken by people within 12 months of lung resection for non-small cell lung cancer                                                                        | Cavalheri, , V, Burtin, C, Formico, VR, Nonoyama, ML, Jenkins, S, Spruit, MA; Hill, K                                   | 2019 |
| Exercise for people with high cardiovascular risk                                                                                                                               | Seron, , P, Lanas, F, Pardo Hernandez, H; Bonfill Cosp, X                                                               | 2014 |
| First aid glucose administration routes for symptomatic hypoglycaemia                                                                                                           | De Buck, , E, Borra, V, Carlson, JN, Zideman, DA, Singletary, EM; Djärv, T                                              | 2019 |
| Ethical case interventions for adult patients                                                                                                                                   | Schildmann, , J, Nadolny, S, Haltaufderheide, J, Gysels, M, Vollmann, J; Bausewein, C                                   | 2019 |
| Exercise for pregnant women with pre-existing diabetes for improving maternal and fetal outcomes                                                                                | Brown, , J, Ceysens, G; Boulvain, M                                                                                     | 2017 |
| Exercise for preventing falls in older people living in the community                                                                                                           | Sherrington, , C, Fairhall, NJ, Wallbank, GK, Tiedemann, A, Michaleff, ZA, Howard, K, Clemson, L, Hopewell, S; Lamb, SE | 2019 |
| Epinephrine for transient tachypnea of the newborn                                                                                                                              | Moresco, , L, Calevo, MG, Baldi, F, Cohen, A; Bruschetti, M                                                             | 2016 |
| Fast track surgery versus conventional recovery strategies for colorectal surgery                                                                                               | Spanjersberg, , WR, Reurings, J, Keus, F; van Laarhoven, CJHM                                                           | 2011 |
| Epidural therapy for the treatment of severe pre-eclampsia in non labouring women                                                                                               | Ray, , A; Ray, S                                                                                                        | 2017 |
| Fluid therapy for acute bacterial meningitis                                                                                                                                    | Maconochie, , IK; Bhaumik, S                                                                                            | 2016 |
| Exercise for preventing and treating osteoporosis in postmenopausal women                                                                                                       | Howe, , TE, Shea, B, Dawson, LJ, Downie, F, Murray, A, Ross, C, Harbour, RT, Caldwell, LM; Creed, G                     | 2011 |
| Enzyme replacement therapy for Anderson-Fabry disease                                                                                                                           | El Dib, , R, Gomaa, H, Carvalho, RP, Camargo, SE, Bazan, R, Barretti, P; Barreto, FC                                    | 2016 |
| Erythropoiesis-stimulating agents for anemia in rheumatoid arthritis                                                                                                            | Martí-Carvajal, , AJ, Agreda-Pérez, LH; Solà, I                                                                         | 2013 |
| First-line beta-blockers versus other antihypertensive medications for chronic type B aortic dissection                                                                         | Chan, , KK, Lai, P; Wright, JM                                                                                          | 2014 |
| Etanercept for the treatment of rheumatoid arthritis                                                                                                                            | Lethaby, , A, Lopez-Olivo, MA, Maxwell, LJ, Burls, A, Tugwell, P; Wells, GA                                             | 2013 |
| Exercise therapy for treatment of non-specific low back pain                                                                                                                    | Hayden, , J, van Tulder, MW, Malmivaara, A; Koes, BW                                                                    | 2005 |
| Family therapy for asthma in children                                                                                                                                           | Yorke, , J; Shulldham, C                                                                                                | 2005 |
| Environmental sanitary interventions for preventing active trachoma                                                                                                             | Rabiu, , M, Alhassan, MB, Ejere, HOD; Evans, JR                                                                         | 2012 |
| Exercise therapy in juvenile idiopathic arthritis                                                                                                                               | Takken, , T, Van Brussel, M, Engelbert, RH, van der Net, JJ, Kuis, W; Helden, PPJM                                      | 2008 |
| Face-down positioning or posturing after macular hole surgery                                                                                                                   | Solebo, , AL, Lange, CAK, Bunce, C; Bainbridge, JW                                                                      | 2011 |
| Fibrinogen depleting agents for acute ischaemic stroke                                                                                                                          | Hao, , Z, Liu, M, Counsell, C, Wardlaw, JM, Lin, S; Zhao, X                                                             | 2012 |
| Fluorides for the prevention of early tooth decay (demineralised white lesions) during fixed brace treatment                                                                    | Benson, , PE, Parkin, N, Dyer, F, Millett, DT, Furness, S; Germain, P                                                   | 2013 |
| First and second trimester serum tests with and without first trimester ultrasound tests for Down's syndrome screening                                                          | Allred, , SK, Takwoingi, Y, Guo, B, Pennant, M, Deeks, JJ, Neilson, JP; Alfirevic, Z                                    | 2017 |
| Folate supplementation in people with sickle cell disease                                                                                                                       | Dixit, , R, Nettem, S, Madan, SS, Soc, HHK, Abas, ABL, Vance, LD; Stover, PJ                                            | 2018 |
| Family therapy for autism spectrum disorders                                                                                                                                    | Spain, , D, Sin, J, Paliokosta, E, Furuta, M, Prunty, JE, Chalder, T, Murphy, DG; Happé, FG                             | 2017 |
| Exercise for rheumatoid arthritis of the hand                                                                                                                                   | Williams, , MA, Srikanth, C, Heine, PJ, Bruce, J, Brosseau, L, Hoxey-Thomas, N; Lamb, SE                                | 2018 |
| Extubation from low-rate intermittent positive airway pressure versus extubation after a trial of endotracheal continuous positive airway pressure in intubated preterm infants | Davis, , PG; Henderson-Smart, DJ                                                                                        | 2001 |
| Fluoride varnishes for preventing dental caries in children and adolescents                                                                                                     | Marinho, , VCC, Worthington, HV, Walsh, T; Clarkson, JE                                                                 | 2013 |
| Evening versus morning dosing regimen drug therapy for hypertension                                                                                                             | Zhao, , P, Xu, P, Wan, C; Wang, Z                                                                                       | 2011 |
| E-learning for health professionals                                                                                                                                             | Vaona, , A, Banzi, R, Kwag, KH, Rigon, G, Cereda, D, Pecoraro, V, Tramacere, I; Moja, L                                 | 2018 |
| Fluoroquinolones for treating typhoid and paratyphoid fever (enteric fever)                                                                                                     | Effa, , EE, Lassi, ZS, Critchley, JA, Garner, P, Sinclair, D, Olliaro, PL; Bhutta, ZA                                   | 2011 |
| Exercise-based cardiac rehabilitation for coronary heart disease                                                                                                                | Anderson, , L, Thompson, DR, Oldridge, N, Zwisler, AD, Rees, K, Martin, N; Taylor, RS                                   | 2016 |
| Etrolizumab for induction of remission in ulcerative colitis                                                                                                                    | Rosenfeld, , G, Parker, CE, MacDonald, JK; Bressler, B                                                                  | 2015 |
| Fibrinolytic agents for peripheral arterial occlusion                                                                                                                           | Robertson, , I, Kessel, DO; Berridge, DC                                                                                | 2013 |
| Fluids and diuretics for acute ureteric colic                                                                                                                                   | Worster, , AS; Bhanich Supapol, W                                                                                       | 2012 |
| Fetal and umbilical Doppler ultrasound in high-risk pregnancies                                                                                                                 | Alfirevic, , Z, Stampalija, T; Dowswell, T                                                                              | 2017 |
| Fentanyl for neuropathic pain in adults                                                                                                                                         | Derry, , S, Stannard, C, Cole, P, Wiffen, PJ, Knaggs, R, Aldington, D; Moore, RA                                        | 2016 |
| Factor Xa inhibitors versus vitamin K antagonists for preventing cerebral or systemic embolism in patients with atrial fibrillation                                             | Bruins Slot, , KMH; Berge, E                                                                                            | 2018 |
| Fluoxetine versus other types of pharmacotherapy for depression                                                                                                                 | Magni, , LR, Purgato, M, Gastaldon, C, Papola, D, Furukawa, TA, Cipriani, A; Barbui, C                                  | 2013 |
| Exercise programs for people with dementia                                                                                                                                      | Forbes, , D, Forbes, SC, Blake, CM, Thiessen, EJ; Forbes, S                                                             | 2015 |

|                                                                                                                                                                                                                                |                                                                                                                     |      |
|--------------------------------------------------------------------------------------------------------------------------------------------------------------------------------------------------------------------------------|---------------------------------------------------------------------------------------------------------------------|------|
| Fluoroquinolones for treating tuberculosis (presumed drug-sensitive)                                                                                                                                                           | Ziganshina, , LE, Titarenko, AF; Davies, GR                                                                         | 2013 |
| Fluid supplementation for neonatal unconjugated hyperbilirubinaemia                                                                                                                                                            | Lai, , NM, Ahmad Kamar, A, Choo, YM, Kong, JY; Ngim, CF                                                             | 2017 |
| Exercise prior to influenza vaccination for limiting influenza incidence and its related complications in adults                                                                                                               | Grande, , AJ, Reid, H, Thomas, EE, Nunan, D; Foster, C                                                              | 2016 |
| Eplerenone for hypertension                                                                                                                                                                                                    | Tam, , TSC, Wu, MHY, Masson, SC, Tsang, MP, Stabler, SN, Kinkade, A, Tung, A; Tejani, AM                            | 2017 |
| Exercise interventions for smoking cessation                                                                                                                                                                                   | Ussher, , MH, Taylor, AH; Faulkner, GEJ                                                                             | 2014 |
| Exercise for improving balance in older people                                                                                                                                                                                 | Howe, , TE, Rochester, L, Neil, F, Skelton, DA; Ballinger, C                                                        | 2011 |
| Fixed dose subcutaneous low molecular weight heparins versus adjusted dose unfractionated heparin for the initial treatment of venous thromboembolism                                                                          | Robertson, , L; Jones, LE                                                                                           | 2017 |
| Exercise-based cardiac rehabilitation for adults with stable angina                                                                                                                                                            | Long, , L, Anderson, L, Dewhurst, AM, He, J, Bridges, C, Gandhi, M; Taylor, RS                                      | 2018 |
| Epidural pain relief versus systemic opioid-based pain relief for abdominal aortic surgery                                                                                                                                     | Guay, , J; Kopp, S                                                                                                  | 2016 |
| Erythropoietin as an adjuvant treatment with (chemo) radiation therapy for head and neck cancer                                                                                                                                | Lambin, , P, Ramaekers, BLT, van Mastrigt, GAPG, Van den Ende, P, de Jong, J, De Ruyscher, DKM; Pijls-Johannesma, M | 2009 |
| Fibrates for primary prevention of cardiovascular disease events                                                                                                                                                               | Jakob, , T, Nordmann, AJ, Schandelmaier, S, Ferreira-González, I; Briel, M                                          | 2016 |
| Extracorporeal shock wave lithotripsy (ESWL) versus ureteroscopic management for ureteric calculi                                                                                                                              | Aboumarzouk, , OM, Kata, SG, Keeley, FX, McClinton, S; Nabi, G                                                      | 2012 |
| Fluticasone versus 'extrafine' HFA-beclomethasone dipropionate for chronic asthma in adults and children                                                                                                                       | Lasserson, , TJ, Cates, CJ, Lasserson, EH; White, J                                                                 | 2006 |
| Family and carer smoking control programmes for reducing children's exposure to environmental tobacco smoke                                                                                                                    | Behbod, , B, Sharma, M, Baxi, R, Roseby, R; Webster, P                                                              | 2018 |
| Environmental and behavioural interventions for reducing physical activity limitation in community-dwelling visually impaired older people                                                                                     | Skelton, , DA, Howe, TE, Ballinger, C, Neil, F, Palmer, S; Gray, L                                                  | 2013 |
| First-line treatment of advanced epidermal growth factor receptor (EGFR) mutation positive non-squamous non-small cell lung cancer                                                                                             | Greenhalgh, , J, Dwan, K, Boland, A, Bates, V, Vecchio, F, Dundar, Y, Jain, P; Green, JA                            | 2016 |
| Evaluation of follow-up strategies for patients with epithelial ovarian cancer following completion of primary treatment                                                                                                       | Clarke, , T, Galaal, K, Bryant, A; Naik, R                                                                          | 2014 |
| Exercise for hand osteoarthritis                                                                                                                                                                                               | Østerås, , N, Kjekken, I, Smedslund, G, Moe, RH, Slatkowsky-Christensen, B, Uhlig, T; Hagen, KB                     | 2017 |
| External counterpulsation for acute ischaemic stroke                                                                                                                                                                           | Lin, , S, Liu, M, Wu, B, Hao, Z, Yang, J; Tao, W                                                                    | 2012 |
| Exercise-based cardiac rehabilitation in heart transplant recipients                                                                                                                                                           | Anderson, , L, Nguyen, TT, Dall, CH, Burgess, L, Bridges, C; Taylor, RS                                             | 2017 |
| Exercises for adolescent idiopathic scoliosis                                                                                                                                                                                  | Romano, , M, Minozzi, S, Bettany-Saltikov, J, Zaina, F, Chockalingam, N, Kotwicki, T, Maier-Hennes, A; Negrini, S   | 2012 |
| Eszopiclone for insomnia                                                                                                                                                                                                       | Rösner, , S, Englbrecht, C, Wehrle, R, Hajak, G; Soyka, M                                                           | 2018 |
| Flexible sigmoidoscopy versus faecal occult blood testing for colorectal cancer screening in asymptomatic individuals                                                                                                          | Holme, , Ø, Bretthauer, M, Fretheim, A, Odgaard-Jensen, J; Hoff, G                                                  | 2013 |
| Exercise for improving outcomes after osteoporotic vertebral fracture                                                                                                                                                          | Gibbs, , JC, MacIntyre, NJ, Ponzano, M, Templeton, JA, Thabane, L, Papaioannou, A; Giangregorio, LM                 | 2019 |
| Extended versus standard lymph node dissection for urothelial carcinoma of the bladder in patients undergoing radical cystectomy                                                                                               | Hwang, , EC, Sathianathan, NJ, Imamura, M, Kuntz, GM, Risk, MC; Dahm, P                                             | 2019 |
| Fetal biometry for guiding the medical management of women with gestational diabetes mellitus for improving maternal and perinatal health                                                                                      | Rao, , U, de Vries, B, Ross, GP; Gordon, A                                                                          | 2019 |
| Flavonoids for treating venous leg ulcers                                                                                                                                                                                      | Scallan, , C, Bell-Syer, SEM; Aziz, Z                                                                               | 2013 |
| Enzyme replacement therapy with laronidase (Aldurazyme®) for treating mucopolysaccharidosis type I                                                                                                                             | Jameson, , E, Jones, S; Remington, T                                                                                | 2019 |
| Exercise interventions for shoulder dysfunction in patients treated for head and neck cancer                                                                                                                                   | Carvalho, , APV, Vital, FMR; Soares, BGO                                                                            | 2012 |
| Extended-field radiotherapy for locally advanced cervical cancer                                                                                                                                                               | Thamronganantakul, , K, Supakalin, N, Kietpeerakool, C, Pattanittum, P; Lumbiganon, P                               | 2018 |
| First-line tandem high-dose chemotherapy and autologous stem cell transplantation versus single high-dose chemotherapy and autologous stem cell transplantation in multiple myeloma, a systematic review of controlled studies | Naumann-Winter, , F, Greb, A, Borchmann, P, Bohlius, J, Engert, A; Schnell, R                                       | 2012 |
| Exercise-based cardiac rehabilitation for adult patients with an implantable cardioverter defibrillator                                                                                                                        | Nielsen, , KM, Zwisler, AD, Taylor, RS, Svendsen, JH, Lindschou, J, Anderson, L, Jakobsen, JC; Berg, SK             | 2019 |
| Enteral lactoferrin supplementation for prevention of sepsis and necrotizing enterocolitis in preterm infants                                                                                                                  | Pammi, , M; Suresh, G                                                                                               | 2017 |
| Exercise interventions on health-related quality of life for people with cancer during active treatment                                                                                                                        | Mishra, , SI, Scherer, RW, Snyder, C, Geigle, PM, Berlanstein, DR; Topaloglu, O                                     | 2012 |
| Exercise training for advanced lung cancer                                                                                                                                                                                     | Peddle-McIntyre, , CJ, Singh, F, Thomas, R, Newton, RU, Galvão, DA; Cavalheri, V                                    | 2019 |
| Excitatory amino acid antagonists for acute stroke                                                                                                                                                                             | Muir, , KW; Lees, KR                                                                                                | 2003 |
| Ezetimibe for the prevention of cardiovascular disease and all-cause mortality events                                                                                                                                          | Zhan, , S, Tang, M, Liu, F, Xia, P, Shu, M; Wu, X                                                                   | 2018 |
| Fluticasone versus beclomethasone or budesonide for chronic asthma in adults and children                                                                                                                                      | Adams, , NP, Lasserson, TJ, Cates, CJ; Jones, P                                                                     | 2007 |

|                                                                                                                                          |                                                                                                                                                                                                                                                                                        |      |
|------------------------------------------------------------------------------------------------------------------------------------------|----------------------------------------------------------------------------------------------------------------------------------------------------------------------------------------------------------------------------------------------------------------------------------------|------|
| Fluticasone versus placebo for chronic asthma in adults and children                                                                     | Adams, , NP, Bestall, JC, Lasserson, TJ, Jones, P; Cates, CJ                                                                                                                                                                                                                           | 2008 |
| Febuxostat for treating chronic gout                                                                                                     | Tayar, , JH, Lopez-Olivo, MA; Suarez-Almazor, ME                                                                                                                                                                                                                                       | 2012 |
| Family-centred care for hospitalised children aged 0-12 years                                                                            | Shields, , L, Zhou, H, Pratt, J, Taylor, M, Hunter, J; Pascoe, E                                                                                                                                                                                                                       | 2012 |
| Fluoridated milk for preventing dental caries                                                                                            | Yeung, , CA, Chong, LY; Glenn, AM                                                                                                                                                                                                                                                      | 2015 |
| Femoral nerve blocks for acute postoperative pain after knee replacement surgery                                                         | Chan, , EY, Fransen, M, Parker, DA, Assam, PN; Chua, N                                                                                                                                                                                                                                 | 2014 |
| Exercise for haemophilia                                                                                                                 | Strike, , K, Mulder, K; Michael, R                                                                                                                                                                                                                                                     | 2016 |
| Exercise-based rehabilitation programmes for pulmonary hypertension                                                                      | Morris, , NR, Kermeen, FD; Holland, AE                                                                                                                                                                                                                                                 | 2017 |
| Family intervention (brief) for schizophrenia                                                                                            | Okpokoro, , U, Adams, CE; Sampson, S                                                                                                                                                                                                                                                   | 2014 |
| Fibrin glue versus sutures for conjunctival autografting in primary pterygium surgery                                                    | Romano, , V, Cruciani, M, Conti, L; Fontana, L                                                                                                                                                                                                                                         | 2016 |
| Exercise for cancer cachexia in adults                                                                                                   | Grande, , AJ, Silva, V, Riera, R, Medeiros, A, Vitoriano, SGP, Peccin, MS; Maddocks, M                                                                                                                                                                                                 | 2014 |
| Ergonomic positioning or equipment for treating carpal tunnel syndrome                                                                   | O'Connor, , D, Page, MJ, Marshall, SC; Massy-Westropp, N                                                                                                                                                                                                                               | 2012 |
| Epidural analgesia for adults undergoing cardiac surgery with or without cardiopulmonary bypass                                          | Guay, , J; Kopp, S                                                                                                                                                                                                                                                                     | 2019 |
| Exercise-based cardiac rehabilitation for adults with heart failure                                                                      | Long, , L, Mordi, IR, Bridges, C, Sagar, VA, Davies, EJ, Coats, AJS, Dalal, H, Rees, K, Singh, SJ; Taylor, RS                                                                                                                                                                          | 2019 |
| Enzyme replacement therapy with galsulfase for mucopolysaccharidosis type VI                                                             | Brunelli, , MJ, Atallah, AN; da Silva, EMK                                                                                                                                                                                                                                             | 2016 |
| Ergonomic interventions for preventing work-related musculoskeletal disorders of the upper limb and neck among office workers            | Hoe, , VCW, Urquhart, DM, Kelsall, HL, Zamri, EN; Sim, MR                                                                                                                                                                                                                              | 2018 |
| Exercise for pregnant women for preventing gestational diabetes mellitus                                                                 | Han, , S, Middleton, P; Crowther, CA                                                                                                                                                                                                                                                   | 2012 |
| Ephedrine for myasthenia gravis, neonatal myasthenia and the congenital myasthenic syndromes                                             | Vrinten, , C, van der Zwaag, AM, Weinreich, SS, Scholten, RJPM; Verschuuren, JJGM                                                                                                                                                                                                      | 2014 |
| Exercise and mobilisation interventions for carpal tunnel syndrome                                                                       | Page, , MJ, O'Connor, D, Pitt, V; Massy-Westropp, N                                                                                                                                                                                                                                    | 2012 |
| Environmental and behavioural modifications for improving food and fluid intake in people with dementia                                  | Herke, , M, Fink, A, Langer, G, Wustmann, T, Watzke, S, Hanff, AM; Burckhardt, M                                                                                                                                                                                                       | 2018 |
| Ergonomic interventions for preventing musculoskeletal disorders in dental care practitioners                                            | Mulimani, , P, Hoe, VCW, Hayes, MJ, Idiculla, JJ, Abas, ABL; Karanth, L                                                                                                                                                                                                                | 2018 |
| E-Health interventions for anxiety and depression in children and adolescents with long-term physical conditions                         | Thabrew, , H, Stasiak, K, Hetrick, SE, Wong, S, Huss, JH; Merry, SN                                                                                                                                                                                                                    | 2018 |
| Extracranial-intracranial arterial bypass surgery for occlusive carotid artery disease                                                   | Fluri, , F, Engelter, S; Lyrer, P                                                                                                                                                                                                                                                      | 2010 |
| Folic acid for fragile X syndrome                                                                                                        | Rueda, , JR, Ballesteros, J, Guillen, V, Tejada, MI; Solà, I                                                                                                                                                                                                                           | 2011 |
| Enteral tube feeding for amyotrophic lateral sclerosis/motor neuron disease                                                              | Katzberg, , HD; Benatar, M                                                                                                                                                                                                                                                             | 2011 |
| Exercise for people with peripheral neuropathy                                                                                           | White, , CM, Pritchard, J; Turner-Stokes, L                                                                                                                                                                                                                                            | 2004 |
| Foam dressings for venous leg ulcers                                                                                                     | O'Meara, , S; Martyn-St James, M                                                                                                                                                                                                                                                       | 2013 |
| Exercise for pregnant women with gestational diabetes for improving maternal and fetal outcomes                                          | Brown, , J, Ceysens, G; Boulvain, M                                                                                                                                                                                                                                                    | 2017 |
| Fibrin glue instillation under skin flaps to prevent seroma-related morbidity following breast and axillary surgery                      | Sajid, , MS, Hutson, KH, Rapisarda, IF; Bonomi, R                                                                                                                                                                                                                                      | 2013 |
| Epidural analgesia versus patient-controlled intravenous analgesia for pain following intra-abdominal surgery in adults                  | Salicath, , JH, Yeoh, ECY; Bennett, MH                                                                                                                                                                                                                                                 | 2018 |
| Fermented milk for hypertension                                                                                                          | Unger, , L, Reimer, C; Ibsen, H                                                                                                                                                                                                                                                        | 2012 |
| Flow-cycled versus time-cycled synchronized ventilation for neonates                                                                     | Schulzke, , SM, Pillow, J, Ewald, B; Patole, SK                                                                                                                                                                                                                                        | 2010 |
| Factor Xa inhibitors for acute coronary syndromes                                                                                        | Brito, , V, Ciapponi, A; Kwong, J                                                                                                                                                                                                                                                      | 2011 |
| Fish oil for kidney transplant recipients                                                                                                | Lim, , AKH, Manley, KJ, Roberts, MA; Fraenkel, MB                                                                                                                                                                                                                                      | 2016 |
| Fixed-dose combinations of drugs versus single-drug formulations for treating pulmonary tuberculosis                                     | Gallardo, , CR, Rigau Comas, D, Valderrama Rodríguez, A, Roqué i Figuls, M, Parker, LA, Caylà, J; Bonfill Cosp, X                                                                                                                                                                      | 2016 |
| Flexible working conditions and their effects on employee health and wellbeing                                                           | Joyce, , K, Pabayo, R, Critchley, JA; Bamba, C                                                                                                                                                                                                                                         | 2010 |
| Evaluation of the efficacy and safety of adjuvant treatment to levodopa therapy in Parkinson's disease patients with motor complications | Stowe, , R, Ives, N, Clarke, CE, Deane, K, van Hilten, , Wheatley, K, Gray, R, Handley, K; Furmston, A                                                                                                                                                                                 | 2010 |
| Exercise therapy for multiple sclerosis                                                                                                  | Rietberg, , MB, Brooks, D, Uitdehaag, BMJ; Kwakkel, G                                                                                                                                                                                                                                  | 2005 |
| Fixed-dose combination therapy for the prevention of atherosclerotic cardiovascular diseases                                             | Bahiru, , E, de Cates, AN, Farr, MRB, Jarvis, MC, Palla, M, Rees, K, Ebrahim, S; Huffman, MD                                                                                                                                                                                           | 2017 |
| Erythropoietin or Darbepoetin for patients with cancer - meta-analysis based on individual patient data                                  | Bohlus, , J, Schmidlin, K, Brillant, C, Schwarzer, G, Trelle, S, Seidenfeld, J, Zwahlen, M, Clarke, MJ, Weingart, O, Kluge, S, Piper, M, Napoli, M, Rades, D, Steensma, D, Djulbegovic, B, Fey, MF, Ray-Coquard, I, Moebus, V, Thomas, G, Untch, M, Schumacher, M, Egger, M; Engert, A | 2009 |

|                                                                                                                                                                                                                      |                                                                                                                                                           |      |
|----------------------------------------------------------------------------------------------------------------------------------------------------------------------------------------------------------------------|-----------------------------------------------------------------------------------------------------------------------------------------------------------|------|
| Fecal transplantation for treatment of inflammatory bowel disease                                                                                                                                                    | Imdad, , A, Nicholson, MR, Tanner-Smith, EE, Zackular, JP, Gomez-Duarte, OG, Beaulieu, DB; Acra, S                                                        | 2018 |
| Exercise-based cardiac rehabilitation for adults with atrial fibrillation                                                                                                                                            | Risom, , SS, Zwisler, AD, Johansen, PP, Sibillitz, KL, Lindschou, J, Gluud, C, Taylor, RS, Svendsen, JH; Berg, SK                                         | 2017 |
| Extended peginterferon plus ribavirin treatment for 72 weeks versus standard peginterferon plus ribavirin treatment for 48 weeks in chronic hepatitis C genotype 1 infected slow-responder adult patients            | Katz, , LH, Goldvaser, H, Gafter-Gvili, A; Tur-Kaspa, R                                                                                                   | 2012 |
| Ethamsylate for the prevention of morbidity and mortality in preterm or very low birth weight infants                                                                                                                | Hunt, , R; Hey, E                                                                                                                                         | 2010 |
| First-line allogeneic hematopoietic stem cell transplantation of HLA-matched sibling donors compared with first-line ciclosporin and/or antithymocyte or antilymphocyte globulin for acquired severe aplastic anemia | Peinemann, , F, Bartel, C; Grouven, U                                                                                                                     | 2013 |
| Enteral versus parenteral nutrition and enteral versus a combination of enteral and parenteral nutrition for adults in the intensive care unit                                                                       | Lewis, , SR, Schofield-Robinson, OJ, Alderson, P; Smith, AF                                                                                               | 2018 |
| Face-to-face interventions for informing or educating parents about early childhood vaccination                                                                                                                      | Kaufman, , J, Ryan, R, Walsh, L, Horey, D, Leask, J, Robinson, P; Hill, S                                                                                 | 2018 |
| Fingolimod for relapsing-remitting multiple sclerosis                                                                                                                                                                | La Mantia, , L, Tramacere, I, Firwana, B, Pacchetti, I, Palumbo, R; Filippini, G                                                                          | 2016 |
| Exposure to the smell and taste of milk to accelerate feeding in preterm infants                                                                                                                                     | Muelbert, , M, Lin, L, Bloomfield, FH; Harding, JE                                                                                                        | 2019 |
| Folic acid supplementation during pregnancy for maternal health and pregnancy outcomes                                                                                                                               | Lassi, , ZS, Salam, RA, Haider, BA; Bhutta, ZA                                                                                                            | 2013 |
| Families and Schools Together (FAST) for improving outcomes for children and their families                                                                                                                          | Valentine, , JC, Leach, SM, Fowler, AP, Stojda, DK; Macdonald, G                                                                                          | 2019 |
| Enteral tube feeding for cystic fibrosis                                                                                                                                                                             | Shimmin, , D, Lowdon, J; Remington, T                                                                                                                     | 2019 |
| Family-based prevention programmes for alcohol use in young people                                                                                                                                                   | Gilligan, , C, Wolfenden, L, Foxcroft, DR, Williams, AJ, Kingsland, M, Hodder, RK, Stockings, E, McFadyen, TR, Tindall, J, Sherker, S, Rae, J; Wiggers, J | 2019 |
| Exercise for reducing falls in people living with and beyond cancer                                                                                                                                                  | Williams, , AD, Bird, ML, Hardcastle, SGK, Kirschbaum, M, Ogden, KJ; Walters, JAE                                                                         | 2018 |
| Fluoride toothpastes of different concentrations for preventing dental caries                                                                                                                                        | Walsh, , T, Worthington, HV, Glenny, AM, Marinho, VCC; Jeroncio, A                                                                                        | 2019 |
| Exfoliative cytology for diagnosing basal cell carcinoma and other skin cancers in adults                                                                                                                            | Ferrante di Ruffano, , L, Dinnes, J, Chuchu, N, Bayliss, SE, Takwoingi, Y, Davenport, C, Matin, RN, O'Sullivan, C, Roskell, D, Deeks, JJ; Williams, HC    | 2018 |
| Enteral nutrition for maintenance of remission in Crohn's disease                                                                                                                                                    | Akobeng, , AK, Zhang, D, Gordon, M; MacDonald, JK                                                                                                         | 2018 |
| First-line drugs for hypertension                                                                                                                                                                                    | Wright, , JM, Musini, VM; Gill, R                                                                                                                         | 2018 |
| First-line drugs inhibiting the renin angiotensin system versus other first-line antihypertensive drug classes for hypertension                                                                                      | Chen, , YJ, Li, LJ, Tang, WL, Song, JY, Qiu, R, Li, Q, Xue, H; Wright, JM                                                                                 | 2018 |
| Hematopoietic stem cell transplantation for people with sickle cell disease                                                                                                                                          | Oringanje, , C, Nemecek, E; Oniyangi, O                                                                                                                   | 2016 |
| Helminth therapy (worms) for induction of remission in inflammatory bowel disease                                                                                                                                    | Garg, , SK, Croft, AM; Bager, P                                                                                                                           | 2014 |
| Glycerol for acute stroke                                                                                                                                                                                            | Righetti, , E, Celani, MG, Cantisani, TA, Sterzi, R, Boysen, G; Ricci, S                                                                                  | 2004 |
| Garlic for peripheral arterial occlusive disease                                                                                                                                                                     | Jepson, , RG, Kleijnen, J; Leng, GC                                                                                                                       | 2013 |
| Granulopoiesis-stimulating factors to prevent adverse effects in the treatment of malignant lymphoma                                                                                                                 | Bohlius, , J, Herbst, C, Reiser, M, Schwarzer, G; Engert, A                                                                                               | 2008 |
| Heparin for the prevention of intraventricular haemorrhage in preterm infants                                                                                                                                        | Bruschettini, , M, Romantsik, O, Zappettini, S, Banzi, R, Ramenghi, LA; Calevo, MG                                                                        | 2016 |
| Hepatitis B vaccination during pregnancy for preventing infant infection                                                                                                                                             | Sangkomkamhang, , US, Lumbiganon, P; Laopaiboon, M                                                                                                        | 2014 |
| Heparin for the treatment of thrombosis in neonates                                                                                                                                                                  | Romantsik, , O, Bruschettini, M, Zappettini, S, Ramenghi, LA; Calevo, MG                                                                                  | 2016 |
| Ginkgo biloba extract for age-related macular degeneration                                                                                                                                                           | Evans, JR                                                                                                                                                 | 2013 |
| Ganoderma lucidum mushroom for the treatment of cardiovascular risk factors                                                                                                                                          | Klupp, , NL, Chang, D, Hawke, F, Kiat, H, Cao, H, Grant, SJ; Bensoussan, A                                                                                | 2015 |
| Frequency of endotracheal suctioning for the prevention of respiratory morbidity in ventilated newborns                                                                                                              | Bruschettini, , M, Zappettini, S, Moja, L; Calevo, MG                                                                                                     | 2016 |
| Hawthorn extract for treating chronic heart failure                                                                                                                                                                  | Guo, , R, Pittler, MH; Ernst, E                                                                                                                           | 2008 |
| Group behaviour therapy programmes for smoking cessation                                                                                                                                                             | Stead, , LF, Carroll, AJ; Lancaster, T                                                                                                                    | 2017 |
| Gonadotrophin-releasing hormone analogues for endometriosis: bone mineral density                                                                                                                                    | Farmer, , JE, Prentice, A, Breeze, A, Ahmad, G, Duffy, JMN, Watson, A; Pick, A                                                                            | 2003 |
| Garlic for preventing pre-eclampsia and its complications                                                                                                                                                            | Meher, , S; Duley, L                                                                                                                                      | 2006 |
| Haloperidol for agitation in dementia                                                                                                                                                                                | Lonergan, , E, Luxenberg, J, Colford, JM; Birks, J                                                                                                        | 2002 |
| H1-antihistamines for the treatment of anaphylaxis with and without shock                                                                                                                                            | Sheikh, , A, ten Broek, VM, Brown, SGA; Simons, FER                                                                                                       | 2007 |
| Herbal medicines for treatment of irritable bowel syndrome                                                                                                                                                           | Liu, , JP, Yang, M, Liu, Y, Wei, ML; Grimsgaard, S                                                                                                        | 2006 |

|                                                                                                                                          |                                                                                                                                                                   |      |
|------------------------------------------------------------------------------------------------------------------------------------------|-------------------------------------------------------------------------------------------------------------------------------------------------------------------|------|
| Hepatic late adverse effects after antineoplastic treatment for childhood cancer                                                         | Mulder, , RL, Bresters, D, Van den Hof, M, Koot, BGP, Castellino, SM, Loke, YKK, Post, PN, Postma, A, Szőnyi, LP, Levitt, GA, Bardi, E, Skinner, R; van Dalen, EC | 2019 |
| Graduated driver licensing for reducing motor vehicle crashes among young drivers                                                        | Russell, , KF, Vandermeer, B; Hartling, L                                                                                                                         | 2011 |
| Glucocorticosteroids for people with alcoholic hepatitis                                                                                 | Pavlov, , CS, Varganova, DL, Casazza, G, Tsochatzis, E, Nikolova, D; Glud, C                                                                                      | 2019 |
| Gangliosides for acute ischaemic stroke                                                                                                  | Candelise, , L; Ciccone, A                                                                                                                                        | 2001 |
| Glucocorticoids for the treatment of anaphylaxis                                                                                         | Choo, , KJL, Simons, FER; Sheikh, A                                                                                                                               | 2012 |
| Growth hormone therapy for people with thalassaemia                                                                                      | Ngim, , CF, Lai, NM, Hong, JYH, Tan, SL, Ramadas, A, Muthukumarasamy, P; Thong, MK                                                                                | 2017 |
| Ginkgo biloba for intermittent claudication                                                                                              | Nicolai, , SPA, Kruidenier, LM, Bendermacher, BLW, Prins, MH, Stokmans, RA, Broos, PPHL; Teijink, JAW                                                             | 2013 |
| Gangliosides for acute spinal cord injury                                                                                                | Chinnock, , P; Roberts, I                                                                                                                                         | 2005 |
| Gefitinib for advanced non-small cell lung cancer                                                                                        | Sim, , EHA, Yang, IA, Wood-Baker, R, Bowman, RV; Fong, KM                                                                                                         | 2018 |
| Glucocorticosteroids for primary biliary cirrhosis                                                                                       | Prince, , M, Christensen, E; Glud, C                                                                                                                              | 2005 |
| Helminth therapy (worms) for allergic rhinitis                                                                                           | Croft, , AM, Bager, P; Garg, SK                                                                                                                                   | 2012 |
| Helicopter emergency medical services for adults with major trauma                                                                       | Galvagno Jr, , SM, Sikorski, R, Hirshon, JM, Floccare, D, Stephens, C, Beecher, D; Thomas, S                                                                      | 2015 |
| Histologic scoring indices for evaluation of disease activity in Crohn's disease                                                         | Novak, , G, Parker, CE, Pai, RK, MacDonald, JK, Feagan, BG, Sandborn, WJ, D'Haens, G, Jairath, V; Khanna, R                                                       | 2017 |
| High dose rate versus low dose rate intracavity brachytherapy for locally advanced uterine cervix cancer                                 | Liu, , R, Wang, X, Tian, JH, Yang, K, Wang, J, Jiang, L; Hao, XY                                                                                                  | 2014 |
| High-dose versus low-dose oxytocin infusion regimens for induction of labour at term                                                     | Budden, , A, Chen, LJY; Henry, A                                                                                                                                  | 2014 |
| High-dose therapy with autologous stem cell transplantation versus chemotherapy or immuno-chemotherapy for follicular lymphoma in adults | Schaaf, , M, Reiser, M, Borchmann, P, Engert, A; Skoetz, N                                                                                                        | 2012 |
| Healing by primary versus secondary intention after surgical treatment for pilonidal sinus                                               | AL-Khamis, , A, McCallum, I, King, PM; Bruce, J                                                                                                                   | 2010 |
| Home safety education and provision of safety equipment for injury prevention                                                            | Kendrick, , D, Young, B, Mason-Jones, AJ, Ilyas, N, Achana, FA, Cooper, NJ, Hubbard, SJ, Sutton, AJ, Smith, S, Wynn, P, Mulvaney, CA, Watson, MC; Coupland, C     | 2012 |
| Head-to-head oral prophylactic antibiotic therapy for chronic obstructive pulmonary disease                                              | Threapleton, , CJD, Janjua, S, Fortescue, R; Baker, EH                                                                                                            | 2019 |
| Glucose-lowering agents for treating pre-existing and new-onset diabetes in kidney transplant recipients                                 | Lo, , C, Jun, M, Badve, SV, Pilmore, H, White, SL, Hawley, C, Cass, A, Perkovic, V; Zoungas, S                                                                    | 2017 |
| Home-based HIV voluntary counselling and testing (VCT) for improving uptake of HIV testing                                               | Bateganya, , M, Abdulwadud, OA; Kiene, SM                                                                                                                         | 2010 |
| Glutamatergic drugs for schizophrenia                                                                                                    | Tiihonen, , J; Wahlbeck, K                                                                                                                                        | 2006 |
| Hearing aids for mild to moderate hearing loss in adults                                                                                 | Ferguson, , MA, Kitterick, PT, Chong, LY, Edmondson-Jones, M, Barker, F; Hoare, DJ                                                                                | 2017 |
| Hormonal versus non-hormonal contraceptives in women with diabetes mellitus type 1 and 2                                                 | Visser, , J, Snel, M; Van Vliet, HAAM                                                                                                                             | 2013 |
| Heparin and related substances for preventing diabetic kidney disease                                                                    | Li, , J, Wu, HM, Zhang, L, Zhu, B; Dong, BR                                                                                                                       | 2010 |
| Group-based parent training programmes for improving parental psychosocial health                                                        | Barlow, , J, Smailagic, N, Huband, N, Roloff, V; Bennett, C                                                                                                       | 2014 |
| Garlic for the common cold                                                                                                               | Lissiman, , E, Bhasale, AL; Cohen, M                                                                                                                              | 2014 |
| Heparin for assisted reproduction                                                                                                        | Akhtar, , MA, Sur, SD, Raine-Fenning, N, Jayaprakasan, K, Thornton, JG; Quenby, S                                                                                 | 2013 |
| HMG CoA reductase inhibitors (statins) for kidney transplant recipients                                                                  | Palmer, , SC, Navaneethan, SD, Craig, JC, Perkovic, V, Johnson, DW, Nigwekar, SU, Hegbrant, J; Strippoli, GFM                                                     | 2014 |
| High-flux versus low-flux membranes for end-stage kidney disease                                                                         | Palmer, , SC, Rabindranath, KS, Craig, JC, Roderick, PJ, Locatelli, F; Strippoli, GFM                                                                             | 2012 |
| Gloves, gowns and masks for reducing the transmission of meticillin-resistant Staphylococcus aureus (MRSA) in the hospital setting       | López-Alcalde, , J, Mateos-Mazón, M, Guevara, M, Conterno, LO, Solà, I, Cabir Nunes, S; Bonfill Cosp, X                                                           | 2015 |
| Gamma aminobutyric acid (GABA) modulators for amyotrophic lateral sclerosis/motor neuron disease                                         | Diana, , A, Pillai, R, Bongioanni, P, O'Keefe, AG, Miller, RG; Moore, DH                                                                                          | 2017 |
| Follow-up strategies for women treated for early breast cancer                                                                           | Moschetti, , I, Cinquini, M, Lambertini, M, Levaggi, A; Liberati, A                                                                                               | 2016 |
| Glucocorticoids for acute viral bronchiolitis in infants and young children                                                              | Fernandes, , RM, Bialy, LM, Vandermeer, B, Tjosvold, L, Plint, AC, Patel, H, Johnson, DW, Klassen, TP; Hartling, L                                                | 2013 |
| Hand washing promotion for preventing diarrhoea                                                                                          | Ejemot-Nwadiaro, , RI, Ehiri, JE, Arikpo, D, Meremikwu, MM; Critchley, JA                                                                                         | 2015 |
| Galantamine for vascular cognitive impairment                                                                                            | Birks, , J; Craig, D                                                                                                                                              | 2006 |
| Gowning by attendants and visitors in newborn nurseries for prevention of neonatal morbidity and mortality                               | Webster, , J; Pritchard, MA                                                                                                                                       | 2003 |
| Glutamine supplementation for young infants with severe gastrointestinal disease                                                         | Brown, , JVE, Moe-Byrne, T; McGuire, W                                                                                                                            | 2014 |

|                                                                                                                                            |                                                                                                                                              |      |
|--------------------------------------------------------------------------------------------------------------------------------------------|----------------------------------------------------------------------------------------------------------------------------------------------|------|
| Force platform feedback for standing balance training after stroke                                                                         | Barclay-Goddard, , RE, Stevenson, TJ, Poluha, W, Moffatt, M; Taback, SP                                                                      | 2004 |
| Home uterine monitoring for detecting preterm labour                                                                                       | Urquhart, , C, Currell, R, Harlow, F; Callow, L                                                                                              | 2017 |
| Gene therapy for haemophilia                                                                                                               | Sharma, , A, Easow Mathew, M, Sriganesh, V; Reiss, UM                                                                                        | 2016 |
| Glucocorticoid supplementation during ovarian stimulation for IVF or ICSI                                                                  | Kalampokas, , T, Pandian, Z, Keay, SD; Bhattacharya, S                                                                                       | 2017 |
| Golimumab for rheumatoid arthritis                                                                                                         | Singh, , JA, Noorbaloochi, S; Singh, G                                                                                                       | 2010 |
| Home fortification of foods with multiple micronutrient powders for health and nutrition in children under two years of age                | De-Regil, , LM, Suchdev, PS, Vist, GE, Walleaser, S; Peña-Rosas, JP                                                                          | 2011 |
| High-dose chemotherapy followed by autologous stem cell transplantation for patients with relapsed/refractory Hodgkin lymphoma             | Rancea, , M, Monsef, I, von Tresckow, B, Engert, A; Skoetz, N                                                                                | 2013 |
| Heliox inhalation therapy for bronchiolitis in infants                                                                                     | Liet, , JM, Ducruet, T, Gupta, V; Cambonie, G                                                                                                | 2015 |
| Ginseng for cognition                                                                                                                      | Geng, , J, Dong, J, Ni, H, Lee, MS, Wu, T, Jiang, K, Wang, G, Zhou, AL; Malouf, R                                                            | 2010 |
| High-dose chemotherapy for children and young adults with stage IV rhabdomyosarcoma                                                        | Admiraal, , R, van der Paardt, M, Kobes, J, Kremer, LCM, Bisogno, G; Merks, JHM                                                              | 2010 |
| High frequency jet ventilation versus high frequency oscillatory ventilation for pulmonary dysfunction in preterm infants                  | Ethawi, , YH, Abou Mehrem, A, Minski, J, Ruth, CA; Davis, PG                                                                                 | 2016 |
| Home versus in-patient treatment for deep vein thrombosis                                                                                  | Othieno, , R, Okpo, E; Forster, R                                                                                                            | 2018 |
| Haemophilus influenzae oral vaccination for preventing acute exacerbations of chronic bronchitis and chronic obstructive pulmonary disease | Teo, , E, Lockhart, K, Purchuri, SN, Pushparajah, J, Cripps, AW; van Driel, ML                                                               | 2017 |
| Gastrostomy feeding versus oral feeding alone for children with cerebral palsy                                                             | Gantasala, , S, Sullivan, PB; Thomas, AG                                                                                                     | 2013 |
| Heparin-bonded catheters for prolonging the patency of central venous catheters in children                                                | Shah, , PS; Shah, N                                                                                                                          | 2014 |
| Guidelines in professions allied to medicine                                                                                               | Thomas, , LH, Cullum, NA, McColl, E, Rousseau, N, Soutter, J; Steen, N                                                                       | 1999 |
| Fundal pressure during the second stage of labour                                                                                          | Hofmeyr, , GJ, Vogel, JP, Cuthbert, A; Singata, M                                                                                            | 2017 |
| Functional analysis-based interventions for challenging behaviour in dementia                                                              | Moniz Cook, , ED, Swift, K, James, I, Malouf, R, De Vugt, M; Verhey, F                                                                       | 2012 |
| Folic acid with or without vitamin B12 for the prevention and treatment of healthy elderly and demented people                             | Malouf, , R; Grimley Evans, J                                                                                                                | 2008 |
| Fortification of staple foods with zinc for improving zinc status and other health outcomes in the general population                      | Shah, , D, Sachdev, HS, Gera, T, De-Regil, LM; Peña-Rosas, JP                                                                                | 2016 |
| Genomics-based non-invasive prenatal testing for detection of fetal chromosomal aneuploidy in pregnant women                               | Badeau, , M, Lindsay, C, Blais, J, Nshimyumukiza, L, Takwoingi, Y, Langlois, S, Légaré, F, Giguère, Y, Turgeon, AF, Witteman, W; Rousseau, F | 2017 |
| Herbal medicines for fatty liver diseases                                                                                                  | Liu, , ZL, Xie, LZ, Zhu, J, Li, GQ, Grant, SJ; Liu, JP                                                                                       | 2013 |
| Granulocyte and granulocyte-macrophage colony stimulating factors for newly diagnosed patients with myelodysplastic syndromes              | Hutzschenreuter, , F, Monsef, I, Kreuzer, KA, Engert, A; Skoetz, N                                                                           | 2016 |
| Granulocyte-colony stimulating factors as adjunctive therapy for diabetic foot infections                                                  | Cruciani, , M, Lipsky, BA, Mengoli, C; de Lalla, F                                                                                           | 2013 |
| Glatiramer acetate for multiple sclerosis                                                                                                  | La Mantia, , L, Munari, LM; Lovati, R                                                                                                        | 2010 |
| Garlic for the prevention of cardiovascular morbidity and mortality in hypertensive patients                                               | Stabler, , SN, Tejani, AM, Huynh, F; Fowkes, C                                                                                               | 2012 |
| Granulocyte transfusions for neonates with confirmed or suspected sepsis and neutropenia                                                   | Pammi, , M; Brocklehurst, P                                                                                                                  | 2011 |
| Hand assisted laparoscopic surgery versus conventional laparoscopy for colorectal surgery                                                  | Moloo, , H, Haggar, F, Coyle, D, Hutton, B, Duhaime, S, Mamazza, J, Poulin, EC, Boushey, RP; Grimshaw, J                                     | 2010 |
| Higher versus lower protein intake in formula-fed low birth weight infants                                                                 | Fenton, , TR, Premji, SS, Al-Wassia, H; Sauve, RS                                                                                            | 2014 |
| Heliox for non-intubated acute asthma patients                                                                                             | Rodrigo, , GJ, Pollack, CV, Rodrigo, C; Rowe, BH                                                                                             | 2006 |
| Granulocyte-Colony Stimulating Factor (G-CSF) as an adjunct to antibiotics in the treatment of pneumonia in adults                         | Cheng, , AC, Stephens, DP; Currie, BJ                                                                                                        | 2007 |
| Home-based child development interventions for preschool children from socially disadvantaged families                                     | Miller, , S, Maguire, LK; Macdonald, G                                                                                                       | 2011 |
| Homeopathy for chronic asthma                                                                                                              | McCarney, , RW, Linde, K; Lasserson, TJ                                                                                                      | 2004 |
| HMG CoA reductase inhibitors (statins) for people with chronic kidney disease not requiring dialysis                                       | Palmer, , SC, Navaneethan, SD, Craig, JC, Johnson, DW, Perkovic, V, Hegbrant, J; Strippoli, GFM                                              | 2014 |
| Growth factors for angiogenesis in peripheral arterial disease                                                                             | Gorenoi, , V, Brehm, MU, Koch, A; Hagen, A                                                                                                   | 2017 |
| Ginkgo biloba for tinnitus                                                                                                                 | Hilton, , MP, Zimmermann, EF; Hunt, WT                                                                                                       | 2013 |
| Haemoglobin and haematocrit targets for the anaemia of chronic kidney disease                                                              | Strippoli, , GFM, Navaneethan, SD, Craig, JC; Palmer, SC                                                                                     | 2006 |
| Hepatitis A immunisation in persons not previously exposed to hepatitis A                                                                  | Irving, , GJ, Holden, J, Yang, R; Pope, D                                                                                                    | 2012 |
| Group versus conventional antenatal care for women                                                                                         | Catling, , CJ, Medley, N, Foureur, M, Ryan, C, Leap, N, Teate, A; Homer, CSE                                                                 | 2015 |

|                                                                                                                                              |                                                                                                            |      |
|----------------------------------------------------------------------------------------------------------------------------------------------|------------------------------------------------------------------------------------------------------------|------|
| High versus low dose of initial thyroid hormone replacement for congenital hypothyroidism                                                    | Ng, , SM, Anand, D; Weindling, AM                                                                          | 2009 |
| H1-antihistamines for chronic spontaneous urticaria                                                                                          | Sharma, , M, Bennett, C, Cohen, SN; Carter, B                                                              | 2014 |
| Haloperidol dose for the acute phase of schizophrenia                                                                                        | Donnelly, , L, Rathbone, J; Adams, CE                                                                      | 2013 |
| Frequency of dressing changes for central venous access devices on catheter-related infections                                               | Gavin, , NC, Webster, J, Chan, RJ; Rickard, CM                                                             | 2016 |
| Gamma-hydroxybutyrate (GHB) for treatment of alcohol withdrawal and prevention of relapses                                                   | Leone, , MA, Vigna-Taglianti, F, Avanzi, G, Brambilla, R; Faggiano, F                                      | 2010 |
| High-carbohydrate, high-protein, low-fat versus low-carbohydrate, high-protein, high-fat enteral feeds for burns                             | Masters, , B, Aarabi, S, Sidhwa, F; Wood, F                                                                | 2012 |
| Histamine type 2 receptor antagonists as adjuvant treatment for resected colorectal cancer                                                   | Deva, , S; Jameson, M                                                                                      | 2012 |
| Genital ulcer disease treatment for reducing sexual acquisition of HIV                                                                       | Mutua, , FM, M'Imunya, JM; Wiysonge, CS                                                                    | 2012 |
| HMG CoA reductase inhibitors (statins) for preventing acute kidney injury after surgical procedures requiring cardiac bypass                 | Lewicki, , M, Ng, I; Schneider, AG                                                                         | 2015 |
| Haloperidol versus low-potency first-generation antipsychotic drugs for schizophrenia                                                        | Tardy, , M, Huhn, M, Kissling, W, Engel, RR; Leucht, S                                                     | 2014 |
| Hormonal contraception for women exposed to HIV infection                                                                                    | Hofmeyr, , GJ, Singata, M; Sneden, J                                                                       | 2014 |
| Hands-on therapy interventions for upper limb motor dysfunction following stroke                                                             | Winter, , J, Hunter, S, Sim, J; Crome, P                                                                   | 2011 |
| Growth hormone for children with chronic kidney disease                                                                                      | Hodson, , EM, Willis, NS; Craig, JC                                                                        | 2012 |
| Haloperidol for psychosis-induced aggression or agitation (rapid tranquillisation)                                                           | Ostinelli, , EG, Brooke-Powney, MJ, Li, X; Adams, CE                                                       | 2017 |
| Gastro-oesophageal reflux treatment for prolonged non-specific cough in children and adults                                                  | Chang, , AB, Lasserson, TJ, Gaffney, J, Connor, FL; Garske, LA                                             | 2011 |
| GenoType® MTBDRsl assay for resistance to second-line anti-tuberculosis drugs                                                                | Theron, , G, Peter, J, Richardson, M, Warren, R, Dheda, K; Steingart, KR                                   | 2016 |
| Galactomannan detection in broncho-alveolar lavage fluid for invasive aspergillosis in immunocompromised patients                            | de Heer, , K, Gerritsen, MG, Visser, CE; Leeftang, MMG                                                     | 2019 |
| Fundoplication versus postoperative medication for gastro-oesophageal reflux in children with neurological impairment undergoing gastrostomy | Vernon-Roberts, , A; Sullivan, PB                                                                          | 2013 |
| Habit retraining for the management of urinary incontinence in adults                                                                        | Ostaszewicz, , J, Chestney, T; Roe, B                                                                      | 2004 |
| Formula versus maternal breast milk for feeding preterm or low birth weight infants                                                          | Brown, , JVE, Walsh, V; McGuire, W                                                                         | 2019 |
| Green tea ( <i>Camellia sinensis</i> ) for the prevention of cancer                                                                          | Boehm, , K, Borrelli, F, Ernst, E, Habacher, G, Hung, SK, Milazzo, S; Horneber, M                          | 2009 |
| Follow-up strategies for patients treated for non-metastatic colorectal cancer                                                               | Jeffery, , M, Hickey, BE; Hider, PN                                                                        | 2019 |
| Glucocorticoid with cyclophosphamide for paraquat-induced lung fibrosis                                                                      | Li, , LR, Sydenham, E, Chaudhary, B, Beecher, D; You, C                                                    | 2014 |
| Helicobacter pylori eradication for the prevention of gastric neoplasia                                                                      | Ford, , AC, Forman, D, Hunt, R, Yuan, Y; Moayyedi, P                                                       | 2015 |
| Home-based educational interventions for children with asthma                                                                                | Welsh, , EJ, Hasan, M; Li, P                                                                               | 2011 |
| Home versus center based physical activity programs in older adults                                                                          | Ashworth, , NL, Chad, KE, Harrison, EL, Reeder, BA; Marshall, SC                                           | 2005 |
| General physical health advice for people with serious mental illness                                                                        | Tosh, , G, Clifton, AV, Xia, J; White, MM                                                                  | 2014 |
| Framing of health information messages                                                                                                       | Akl, , EA, Oxman, AD, Herrin, J, Vist, GE, Terrenato, I, Sperati, F, Costiniuk, C, Blank, D; Schünemann, H | 2011 |
| High frequency oscillatory ventilation versus conventional ventilation for infants with severe pulmonary dysfunction born at or near term    | De Paoli, , AG, Clark, RH, Bhuta, T; Henderson-Smart, DJ                                                   | 2009 |
| Guanylate cyclase stimulators for pulmonary hypertension                                                                                     | Wardle, , AJ, Seager, MJ, Wardle, R, Tulloh, RMR; Gibbs, JSR                                               | 2016 |
| Gold as an oral corticosteroid sparing agent in stable asthma                                                                                | Evans, , DJ, Cullinan, P, Geddes, DM, Walters, EH, Milan, SJ; Jones, P                                     | 2000 |
| Gene therapy for peripheral arterial disease                                                                                                 | Forster, , R, Liew, A, Bhattacharya, V, Shaw, J; Stansby, G                                                | 2018 |
| Glutamine for induction of remission in Crohn's disease                                                                                      | Akobeng, , AK, Elawad, M; Gordon, M                                                                        | 2016 |
| Home-based therapy programmes for upper limb functional recovery following stroke                                                            | Coupar, , F, Pollock, A, Legg, LA, Sackley, C; van Vliet, P                                                | 2012 |
| Grommets (ventilation tubes) for recurrent acute otitis media in children                                                                    | Venekamp, , RP, Mick, P, Schilder, AGM; Nunez, DA                                                          | 2018 |
| Guided imagery for treating hypertension in pregnancy                                                                                        | Haruna, , M, Matsuzaki, M, Ota, E, Shiraishi, M, Hanada, N; Mori, R                                        | 2019 |
| Home or foster home care versus institutional long-term care for functionally dependent older people                                         | Young, , C, Hall, AM, Gonçalves-Bradley, DC, Quinn, TJ, Hooft, L, van Munster, BC; Stott, DJ               | 2017 |
| Hormonal therapy in advanced or recurrent endometrial cancer                                                                                 | Kokka, , F, Brockbank, E, Oram, D, Gallagher, C; Bryant, A                                                 | 2010 |
| Heparin for prolonging peripheral intravenous catheter use in neonates                                                                       | Shah, , PS, Ng, E; Sinha, AK                                                                               | 2005 |
| Home- versus hospital-based phototherapy for the treatment of non-haemolytic jaundice in infants at more than 37 weeks' gestation            | Malwade, , US; Jardine, LA                                                                                 | 2014 |



|                                                                                                                                                                                                            |                                                                                                                                           |      |
|------------------------------------------------------------------------------------------------------------------------------------------------------------------------------------------------------------|-------------------------------------------------------------------------------------------------------------------------------------------|------|
| Foot orthoses for patellofemoral pain in adults                                                                                                                                                            | Hossain, , M, Alexander, P, Burls, A; Jobanputra, P                                                                                       | 2011 |
| Holding chambers versus nebulisers for inhaled steroids in chronic asthma                                                                                                                                  | Cates, , CJ, Bestall, JC; Adams, NP                                                                                                       | 2006 |
| High-intensity versus low-intensity physical activity or exercise in people with hip or knee osteoarthritis                                                                                                | Regnaud, , JP, Lefevre-Colau, MM, Trinquart, L, Nguyen, C, Boutron, I, Brosseau, L; Ravaud, P                                             | 2015 |
| Green and black tea for the primary prevention of cardiovascular disease                                                                                                                                   | Hartley, , L, Flowers, N, Holmes, J, Clarke, A, Stranges, S, Hooper, L; Rees, K                                                           | 2013 |
| Heliox for croup in children                                                                                                                                                                               | Moraa, , I, Sturman, N, McGuire, TM; van Driel, ML                                                                                        | 2018 |
| G-CSF and GM-CSF for treating or preventing neonatal infections                                                                                                                                            | Carr, , R, Modi, N; Doré, CJ                                                                                                              | 2003 |
| Haematological interventions for treating disseminated intravascular coagulation during pregnancy and postpartum                                                                                           | Marti-Carvajal, , AJ, Comunián-Carrasco, G; Peña-Martí, GE                                                                                | 2011 |
| Fortification of staple foods with vitamin A for vitamin A deficiency                                                                                                                                      | Hombali, , AS, Solon, JA, Venkatesh, BT, Nair, NS; Peña-Rosas, JP                                                                         | 2019 |
| Glucocorticosteroids for infants with biliary atresia following Kasai portoenterostomy                                                                                                                     | Tyraskis, , A, Parsons, C; Davenport, M                                                                                                   | 2018 |
| Glucocorticosteroids for primary sclerosing cholangitis                                                                                                                                                    | Giljaca, , V, Poropat, G, Stimac, D; Gluud, C                                                                                             | 2010 |
| Glycoprotein IIb-IIIa inhibitors for acute ischaemic stroke                                                                                                                                                | Ciccone, , A, Motto, C, Abraha, I, Cozzolino, F; Santilli, I                                                                              | 2014 |
| Glucocorticosteroid-free versus glucocorticosteroid-containing immunosuppression for liver transplanted patients                                                                                           | Fairfield, , C, Penninga, L, Powell, J, Harrison, EM; Wigmore, SJ                                                                         | 2018 |
| Guidewire-assisted cannulation of the common bile duct for the prevention of post-endoscopic retrograde cholangiopancreatography (ERCP) pancreatitis                                                       | Tse, , F, Yuan, Y, Moayyedi, P; Leontiadis, GI                                                                                            | 2012 |
| High-dose chemotherapy with autologous stem cell transplantation in the first line treatment of aggressive Non-Hodgkin Lymphoma (NHL) in adults                                                            | Greb, , A, Bohlius, J, Schiefer, D, Schwarzer, G, Schulz, H; Engert, A                                                                    | 2008 |
| Home-based versus centre-based cardiac rehabilitation                                                                                                                                                      | Anderson, , L, Sharp, GA, Norton, RJ, Dalal, H, Dean, SG, Jolly, K, Cowie, A, Zawada, A; Taylor, RS                                       | 2017 |
| Histamine H2-receptor antagonists for urticaria                                                                                                                                                            | Fedorowicz, , Z, van Zuuren, EJ; Hu, N                                                                                                    | 2012 |
| Helicobacter pylori eradication therapy vs. antisecretory non-eradication therapy (with or without long-term maintenance antisecretory therapy) for the prevention of recurrent bleeding from peptic ulcer | Gisbert, , JP, Khorrami, S, Carballo, F, Calvet, X, Gené, E; Dominguez-Muñoz, E                                                           | 2004 |
| Haemodilution for acute ischaemic stroke                                                                                                                                                                   | Chang, , TS; Jensen, MB                                                                                                                   | 2014 |
| Glutamine supplementation for critically ill adults                                                                                                                                                        | Tao, , KM, Li, XQ, Yang, LQ, Yu, WF, Lu, ZJ, Sun, YM; Wu, FX                                                                              | 2014 |
| Fortification of maize flour with iron for controlling anaemia and iron deficiency in populations                                                                                                          | Garcia-Casal, , MN, Peña-Rosas, JP, De-Regil, LM, Gwartz, JA; Pasricha, SR                                                                | 2018 |
| Granulocyte colony stimulating factor therapy for acute myocardial infarction                                                                                                                              | Moazzami, , K, Roohi, A; Moazzami, B                                                                                                      | 2013 |
| Histologic scoring indices for evaluation of disease activity in ulcerative colitis                                                                                                                        | Mosli, , MH, Parker, CE, Nelson, SA, Baker, KA, MacDonald, JK, Zou, GY, Feagan, BG, Khanna, R, Levesque, BG; Jairath, V                   | 2017 |
| Gloves, extra gloves or special types of gloves for preventing percutaneous exposure injuries in healthcare personnel                                                                                      | Mischke, , C, Verbeek, JH, Saarto, A, Lavoie, MC, Pahwa, M; Ijaz, S                                                                       | 2014 |
| Gene therapy for sickle cell disease                                                                                                                                                                       | Olowoyeye, , A; Okwundu, CI                                                                                                               | 2018 |
| Glutamine supplementation to prevent morbidity and mortality in preterm infants                                                                                                                            | Moe-Byrne, , T, Brown, JVE; McGuire, W                                                                                                    | 2016 |
| Heparin versus 0.9% sodium chloride intermittent flushing for the prevention of occlusion in long term central venous catheters in infants and children                                                    | Bradford, , NK, Edwards, RM; Chan, RJ                                                                                                     | 2015 |
| High-flow nasal cannula therapy for respiratory support in children                                                                                                                                        | Mayfield, , S, Jauncey-Cooke, J, Hough, JL, Schibler, A, Gibbons, K; Bogossian, F                                                         | 2014 |
| Home-based care for reducing morbidity and mortality in people infected with HIV/AIDS                                                                                                                      | Young, , T; Busgeeth, K                                                                                                                   | 2010 |
| Green tea for weight loss and weight maintenance in overweight or obese adults                                                                                                                             | Jurgens, , TM, Whelan, AM, Killian, L, Doucette, S, Kirk, S; Foy, E                                                                       | 2012 |
| High-dose chemotherapy and autologous bone marrow or stem cell transplantation versus conventional chemotherapy for women with early poor prognosis breast cancer                                          | Farquhar, , C, Marjoribanks, J, Lethaby, A; Azhar, M                                                                                      | 2016 |
| Formoterol versus short-acting beta-agonists as relief medication for adults and children with asthma                                                                                                      | Welsh, , EJ; Cates, CJ                                                                                                                    | 2010 |
| Functional endoscopic balloon dilation of sinus ostia for chronic rhinosinusitis                                                                                                                           | Ahmed, , J, Pal, S, Hopkins, C; Jayaraj, S                                                                                                | 2011 |
| Health system and community level interventions for improving antenatal care coverage and health outcomes                                                                                                  | Mbuagbaw, , L, Medley, N, Darzi, AJ, Richardson, M, Habiba Garga, K; Ongolo-Zogo, P                                                       | 2015 |
| Graduated compression stockings for prevention of deep vein thrombosis                                                                                                                                     | Sachdeva, , A, Dalton, M; Lees, T                                                                                                         | 2018 |
| Honey for acute cough in children                                                                                                                                                                          | Oduwole, , O, Udoh, EE, Oyo-Ita, A; Meremikwu, MM                                                                                         | 2018 |
| Fortification of wheat and maize flour with folic acid for population health outcomes                                                                                                                      | Centeno Tablante, , E, Pachón, H, Guetterman, HM; Finkelstein, JL                                                                         | 2019 |
| High-frequency ultrasound for diagnosing skin cancer in adults                                                                                                                                             | Dinnes, , J, Bamber, J, Chuchu, N, Bayliss, SE, Takwoingi, Y, Davenport, C, Godfrey, K, O'Sullivan, C, Matin, RN, Deeks, JJ; Williams, HC | 2018 |

|                                                                                                                                                         |                                                                                                                 |      |
|---------------------------------------------------------------------------------------------------------------------------------------------------------|-----------------------------------------------------------------------------------------------------------------|------|
| Genetic testing for prevention of severe drug-induced skin rash                                                                                         | Alfirevic, , A, Pirmohamed, M, Marinovic, B, Harcourt-Smith, L, Jorgensen, AL; Cooper, TE                       | 2019 |
| Hypnotherapy for smoking cessation                                                                                                                      | Barnes, , J, McRobbie, H, Dong, CY, Walker, N; Hartmann-Boyce, J                                                | 2019 |
| Insulin for glycaemic control in acute ischaemic stroke                                                                                                 | Bellolio, , MF, Gilmore, RM; Ganti, L                                                                           | 2014 |
| Inhaled corticosteroid effects on bone metabolism in asthma and mild chronic obstructive pulmonary disease                                              | Jones, , A, Fay, JK, Burr, ML, Stone, M, Hood, K; Roberts, G                                                    | 2002 |
| Indoor residual spraying for preventing malaria                                                                                                         | Pluess, , B, Tanser, FC, Lengeler, C; Sharp, BL                                                                 | 2010 |
| Insulin and oral agents for managing cystic fibrosis-related diabetes                                                                                   | Onady, , GM; Stolfi, A                                                                                          | 2016 |
| Increased energy intake for preterm infants with (or developing) bronchopulmonary dysplasia/chronic lung disease                                        | Lai, , NM, Rajadurai, SV; Tan, K                                                                                | 2006 |
| Hydroxyurea (hydroxycarbamide) for sickle cell disease                                                                                                  | Nevitt, , SJ, Jones, AP; Howard, J                                                                              | 2017 |
| In vitro fertilisation versus tubal reanastomosis (sterilisation reversal) for subfertility after tubal sterilisation                                   | Yossry, , M, Aboulghar, M, D'Angelo, A; Gillett, W                                                              | 2006 |
| Hormone replacement for osteoporosis in women with primary biliary cirrhosis                                                                            | Rudic, , JS, Poropat, G, Krstic, MN, Bjelakovic, G; Gluud, C                                                    | 2011 |
| Image-guided versus blind glucocorticoid injection for shoulder pain                                                                                    | Bloom, , JE, Rischin, A, Johnston, RV; Buchbinder, R                                                            | 2012 |
| Inotropic agents and vasodilator strategies for the treatment of cardiogenic shock or low cardiac output syndrome                                       | Schumann, , J, Henrich, EC, Strobl, H, Prondzinsky, R, Weiche, S, Thiele, H, Werdan, K, Frantz, S; Unverzagt, S | 2018 |
| Immunonutrition for acute respiratory distress syndrome (ARDS) in adults                                                                                | Dushianthan, , A, Cusack, R, Burgess, VA, Grocott, MPW; Calder, PC                                              | 2019 |
| Hysterectomy with radiotherapy or chemotherapy or both for women with locally advanced cervical cancer                                                  | Kokka, , F, Bryant, A, Brockbank, E, Powell, M; Oram, D                                                         | 2015 |
| Hypertonic salt solution for peri-operative fluid management                                                                                            | Shrum, , B, Church, B, McArthur, E, Burns, KEA, Znajda, T; McAlister, V                                         | 2016 |
| Incentive spirometry for prevention of postoperative pulmonary complications in upper abdominal surgery                                                 | do Nascimento Junior, , P, Módolo, NSP, Andrade, S, Guimarães, MMF, Braz, LG; El Dib, R                         | 2014 |
| Hypothermia for neuroprotection in adults after cardiopulmonary resuscitation                                                                           | Arrich, , J, Holzer, M, Havel, C, Müllner, M; Herkner, H                                                        | 2016 |
| Influenza vaccines for preventing cardiovascular disease                                                                                                | Clar, , C, Oseni, Z, Flowers, N, Keshtkar-Jahromi, M; Rees, K                                                   | 2015 |
| Hydroxyurea (hydroxycarbamide) for transfusion-dependent $\beta$ -thalassaemia                                                                          | Ansari, , SH, Lassi, ZS, Khawaja, SM, Adil, SO; Shamsi, TS                                                      | 2019 |
| Hyperbaric oxygen therapy for delayed onset muscle soreness and closed soft tissue injury                                                               | Bennett, , MH, Best, TM, Babul-Wellar, S; Taunton, JE                                                           | 2005 |
| Immunotherapy (excluding checkpoint inhibitors) for stage I to III non-small cell lung cancer treated with surgery or radiotherapy with curative intent | Zhu, , J, Li, R, Tiselius, E, Roudi, R, Teghararian, O, Suo, C; Song, H                                         | 2017 |
| Hyperbaric oxygen therapy for promoting fracture healing and treating fracture non-union                                                                | Bennett, , MH, Stanford, RE; Turner, R                                                                          | 2012 |
| Immunosuppressant and immunomodulatory treatment for dermatomyositis and polymyositis                                                                   | Gordon, , PA, Winer, JB, Hoogendijk, JE; Choy, EHS                                                              | 2012 |
| Immunostimulants for preventing respiratory tract infection in children                                                                                 | Del-Rio-Navarro, , BE, Espinosa-Rosales, FJ, Flenady, V; Sienra-Monge, JJJ                                      | 2006 |
| Hormone therapy in postmenopausal women and risk of endometrial hyperplasia                                                                             | Furness, , S, Roberts, H, Marjoribanks, J; Lethaby, A                                                           | 2012 |
| Human papillomavirus testing versus repeat cytology for triage of minor cytological cervical lesions                                                    | Arbyn, , M, Roelens, J, Simoons, C, Buntinx, F, Paraskevaidis, E, Martin-Hirsch, PPL; Prendiville, WJ           | 2013 |
| Injection sclerotherapy for varicose veins                                                                                                              | Tisi, , PV, Beverley, C; Rees, A                                                                                | 2006 |
| Indoor air modification interventions for prolonged non-specific cough in children                                                                      | Donnelly, , D, Everard, M; Chang, AB                                                                            | 2006 |
| Immunotherapy for idiopathic lumbosacral plexopathy                                                                                                     | van Eijk, , J, Chan, YC; Russell, JW                                                                            | 2013 |
| Inhaled nitric oxide for the postoperative management of pulmonary hypertension in infants and children with congenital heart disease                   | Bizzarro, , M, Gross, I; Barbosa, FT                                                                            | 2014 |
| Inhaled nitric oxide for respiratory failure in preterm infants                                                                                         | Barrington, , KJ, Finer, N; Pennaforte, T                                                                       | 2017 |
| Immunotherapy for recurrent miscarriage                                                                                                                 | Wong, , LF, Porter, TF; Scott, JR                                                                               | 2014 |
| Injection therapy for subacute and chronic low-back pain                                                                                                | Staal, , JB, de Bic, R, de Vet, HCW, Hildebrandt, J; Nelemans, P                                                | 2008 |
| Inhaled versus systemic corticosteroids for the treatment of bronchopulmonary dysplasia in ventilated very low birth weight preterm infants             | Shah, , SS, Ohlsson, A, Halliday, HL; Shah, VS                                                                  | 2017 |
| Hyperbaric oxygen therapy for people with autism spectrum disorder (ASD)                                                                                | Xiong, , T, Chen, H, Luo, R; Mu, D                                                                              | 2016 |
| Human chorionic gonadotrophin (hCG) for preventing miscarriage                                                                                          | Morley, , LC, Simpson, N; Tang, T                                                                               | 2013 |
| Inhaled versus systemic corticosteroids for preventing bronchopulmonary dysplasia in ventilated very low birth weight preterm neonates                  | Shah, , SS, Ohlsson, A, Halliday, HL; Shah, VS                                                                  | 2017 |
| Hypothermia to reduce neurological damage following coronary artery bypass surgery                                                                      | Rees, , K, Beranek-Stanley, M, Burke, M; Ebrahim, S                                                             | 2001 |

|                                                                                                                                              |                                                                                                                                                                                                                                                                                               |      |
|----------------------------------------------------------------------------------------------------------------------------------------------|-----------------------------------------------------------------------------------------------------------------------------------------------------------------------------------------------------------------------------------------------------------------------------------------------|------|
| Hyperfractionated or accelerated radiotherapy for head and neck cancer                                                                       | Baujat, , B, Bourhis, J, Blanchard, P, Overgaard, J, Ang, KK, Saunders, M, Le Maître, A, Bernier, J, Horiot, JC, Maillard, E, Pajak, TF, Poulsen, MG, Bourredjem, A, O'Sullivan, B, Dobrowsky, W, Andrzej, H, Skladowski, K, Hay, JH, Pinto, LHJ, Fu, KK, Fallai, C, Sylvester, R; Pignon, JP | 2010 |
| Hypothermia for neuroprotection in children after cardiopulmonary arrest                                                                     | Scholefield, , B, Duncan, H, Davies, P, Gao Smith, F, Khan, K, Perkins, GD; Morris, K                                                                                                                                                                                                         | 2013 |
| Infusion techniques for peripheral arterial thrombolysis                                                                                     | Kessel, , DO, Berridge, DC; Robertson, I                                                                                                                                                                                                                                                      | 2004 |
| Hydralazine for essential hypertension                                                                                                       | Kandler, , MR, Mah, GT, Tejani, AM, Stabler, SN; Salzwedel, DM                                                                                                                                                                                                                                | 2011 |
| Indwelling bladder catheterisation as part of intraoperative and postoperative care for caesarean section                                    | Abdel-Aleem, , H, Aboelnasr, MF, Jayousi, TM; Habib, FA                                                                                                                                                                                                                                       | 2014 |
| Implementation strategies for health systems in low-income countries: an overview of systematic reviews                                      | Pantoja, , T, Opiyo, N, Lewin, S, Paulsen, E, Ciapponi, A, Wiysonge, CS, Herrera, CA, Rada, G, Peñaloza, B, Dudley, L, Gagnon, MP, Garcia Marti, S; Oxman, AD                                                                                                                                 | 2017 |
| Inhaled corticosteroids in children with persistent asthma: effects on growth                                                                | Zhang, , L, Prietsch, SOM; Ducharme, FM                                                                                                                                                                                                                                                       | 2014 |
| Immediate start of hormonal contraceptives for contraception                                                                                 | Lopez, , LM, Newmann, SJ, Grimes, DA, Nanda, K; Schulz, KF                                                                                                                                                                                                                                    | 2012 |
| Injectable gold for rheumatoid arthritis                                                                                                     | Clark, , P, Tugwell, P, Bennett, KJ, Bombardier, C, Shea, B, Wells, GA; Suarez-Almazor, ME                                                                                                                                                                                                    | 1997 |
| Information provision for people with multiple sclerosis                                                                                     | Köpke, , S, Solari, A, Rahn, A, Khan, F, Heesen, C; Giordano, A                                                                                                                                                                                                                               | 2018 |
| Inhaled steroids for episodic viral wheeze of childhood                                                                                      | McKean, , MC; Ducharme, F                                                                                                                                                                                                                                                                     | 2000 |
| Hyperbaric oxygen for carbon monoxide poisoning                                                                                              | Buckley, , NA, Juurlink, DN, Isbister, G, Bennett, MH; Lavonas, EJ                                                                                                                                                                                                                            | 2011 |
| Influenza vaccination in children being treated with chemotherapy for cancer                                                                 | Goossen, , GM, Kremer, LCM; van de Wetering, MD                                                                                                                                                                                                                                               | 2013 |
| Information for pregnant women about caesarean birth                                                                                         | Horey, , D, Weaver, J; Russell, H                                                                                                                                                                                                                                                             | 2004 |
| Inhaled cromones for prolonged non-specific cough in children                                                                                | Chang, , AB, Marchant, JM, McKean, MC; Morris, PS                                                                                                                                                                                                                                             | 2004 |
| Hypothermia for traumatic brain injury                                                                                                       | Lewis, , SR, Evans, DJW, Butler, AR, Schofield-Robinson, OJ; Alderson, P                                                                                                                                                                                                                      | 2017 |
| Immediate versus delayed treatment for recently symptomatic carotid artery stenosis                                                          | Vasconcelos, , V, Cassola, N, da Silva, EMK; Baptista-Silva, JCC                                                                                                                                                                                                                              | 2016 |
| Hormones for suspected impaired fetal growth                                                                                                 | Say, , L, Gülmezoglu, AM; Hofmeyr, GJ                                                                                                                                                                                                                                                         | 2003 |
| Increased versus stable doses of inhaled corticosteroids for exacerbations of chronic asthma in adults and children                          | Kew, , KM, Quinn, M, Quon, BS; Ducharme, FM                                                                                                                                                                                                                                                   | 2016 |
| House dust mite avoidance measures for perennial allergic rhinitis                                                                           | Sheikh, , A, Hurwitz, B, Nurmatov, U; van Schayck, CP                                                                                                                                                                                                                                         | 2010 |
| Inhaled nitric oxide for acute chest syndrome in people with sickle cell disease                                                             | Al Hajeri, , A, Serjeant, GR; Fedorowicz, Z                                                                                                                                                                                                                                                   | 2008 |
| Hysterectomy versus hysterectomy plus oophorectomy for premenopausal women                                                                   | Orozco, , LJ, Tristan, M, Vreugdenhil, MMT; Salazar, A                                                                                                                                                                                                                                        | 2014 |
| Inhaled versus oral steroids for adults with chronic asthma                                                                                  | Mash, , BRJ, Bheekie, A; Jones, P                                                                                                                                                                                                                                                             | 2001 |
| Hormone replacement therapy for women with type 1 diabetes mellitus                                                                          | Mackay, , L, Kilbride, L, Adamson, KA; Chisholm, J                                                                                                                                                                                                                                            | 2013 |
| Imaging for the exclusion of pulmonary embolism in pregnancy                                                                                 | van Mens, , TE, Scheres, LJJ, de Jong, PG, Leeftang, MMG, Nijkeuter, M; Middeldorp, S                                                                                                                                                                                                         | 2017 |
| Insecticide space spraying for preventing malaria transmission                                                                               | Pryce, , J, Choi, L, Richardson, M; Malone, D                                                                                                                                                                                                                                                 | 2018 |
| Inhaled anticholinergics and short-acting beta2-agonists versus short-acting beta2-agonists alone for children with acute asthma in hospital | Vézina, , K, Chauhan, BF; Ducharme, FM                                                                                                                                                                                                                                                        | 2014 |
| Hyperbaric oxygen therapy for multiple sclerosis                                                                                             | Bennett, , MH; Heard, R                                                                                                                                                                                                                                                                       | 2004 |
| Household interventions for preventing domestic lead exposure in children                                                                    | Nussbaumer-Streit, , B, Yeoh, B, Griebler, U, Pfadenhauer, LM, Busert, LK, Lhachimi, SK, Lohner, S; Gartlehner, G                                                                                                                                                                             | 2016 |
| Indomethacin for Alzheimer's disease                                                                                                         | Tabet, , N; Feldman, H                                                                                                                                                                                                                                                                        | 2002 |
| Image-guided percutaneous procedure plus metronidazole versus metronidazole alone for uncomplicated amoebic liver abscess                    | Chavez-Tapia, , NC, Hernandez-Calleros, J, Tellez-Avila, FI, Torre, A; Uribe, M                                                                                                                                                                                                               | 2009 |
| Image guided surgery for the resection of brain tumours                                                                                      | Barone, , DG, Lawrie, TA; Hart, MG                                                                                                                                                                                                                                                            | 2014 |
| Immediate versus deferred delivery of the preterm baby with suspected fetal compromise for improving outcomes                                | Stock, , SJ, Bricker, L, Norman, JE; West, HM                                                                                                                                                                                                                                                 | 2016 |
| Hydration for treatment of preterm labour                                                                                                    | Stan, , CM, Boulvain, M, Pfister, R; Hirsbrunner-Almagbaly, P                                                                                                                                                                                                                                 | 2013 |
| Horticultural therapy for schizophrenia                                                                                                      | Liu, , Y, Bo, L, Sampson, S, Roberts, S, Zhang, G; Wu, W                                                                                                                                                                                                                                      | 2014 |
| Hospital nurse-staffing models and patient- and staff-related outcomes                                                                       | Butler, , M, Schultz, TJ, Halligan, P, Sheridan, A, Kinsman, L, Rotter, T, Beaumier, J, Kelly, RG; Drennan, J                                                                                                                                                                                 | 2019 |
| Inhaled short acting beta2-agonist use in chronic asthma: regular versus as needed treatment                                                 | Walters, , EH, Walters, JAE, Gibson, PG; Jones, P                                                                                                                                                                                                                                             | 2003 |
| Human recombinant activated factor VII for upper gastrointestinal bleeding in patients with liver diseases                                   | Marti-Carvajal, , AJ, Karakitsiou, DE; Salanti, G                                                                                                                                                                                                                                             | 2012 |

|                                                                                                                                                              |                                                                                                                                                  |      |
|--------------------------------------------------------------------------------------------------------------------------------------------------------------|--------------------------------------------------------------------------------------------------------------------------------------------------|------|
| Immunosuppressants for the prophylaxis of corneal graft rejection after penetrating keratoplasty                                                             | Abudou, , M, Wu, T, Evans, JR; Chen, X                                                                                                           | 2015 |
| Ibuprofen for acute treatment of episodic tension-type headache in adults                                                                                    | Derry, , S, Wiffen, PJ, Moore, RA; Bendtsen, L                                                                                                   | 2015 |
| Immunosuppressive treatment for non-systemic vasculitic neuropathy                                                                                           | Vrancken, , AFJE, Hughes, RAC, Said, G, Wokke, JHJ; Notermans, NC                                                                                | 2007 |
| Immunomodulators and immunosuppressants for multiple sclerosis: a network meta-analysis                                                                      | Filippini, , G, Del Giovane, C, Vacchi, L, D'Amico, R, Di Pietrantonj, C, Beecher, D; Salanti, G                                                 | 2013 |
| Hyperbaric oxygen therapy for vascular dementia                                                                                                              | Xiao, , Y, Wang, J, Jiang, S; Luo, H                                                                                                             | 2012 |
| Immediate postabortal insertion of intrauterine devices                                                                                                      | Okusanya, , BO, Oduwale, O; Effa, EE                                                                                                             | 2014 |
| House dust mite control measures for asthma                                                                                                                  | Gøtzsche, , PC; Johansen, HK                                                                                                                     | 2008 |
| Increasing antipsychotic dose versus switching antipsychotic for non response in schizophrenia                                                               | Samara, , MT, Klupp, E, Helfer, B, Rothe, PH, Schneider-Thoma, J; Leucht, S                                                                      | 2018 |
| Immune tolerance induction for treating inhibitors in people with congenital haemophilia A or B                                                              | Athale, , AH, Marcucci, M; Iorio, A                                                                                                              | 2014 |
| Hydralazine in infants with persistent hypoxemic respiratory failure                                                                                         | Kawaguchi, , A, Isayama, T, Mori, R, Minami, H, Yang, Y; Tamura, M                                                                               | 2013 |
| Hydroxyzine for generalised anxiety disorder                                                                                                                 | Guaiana, , G, Barbui, C; Cipriani, A                                                                                                             | 2010 |
| Inhaled corticosteroids with combination inhaled long-acting beta2-agonists and long-acting muscarinic antagonists for chronic obstructive pulmonary disease | Tan, , DJ, White, CJ, Walters, JAE; Walters, EH                                                                                                  | 2016 |
| Inhaled non-steroid anti-inflammatories for children and adults with bronchiectasis                                                                          | Pizzutto, , SJ, Upham, JW, Yerkovich, ST; Chang, AB                                                                                              | 2016 |
| Immunosuppressant and immunomodulatory treatments for multifocal motor neuropathy                                                                            | Umapathi, , T, Hughes, RAC, Nobile-Orazio, E; Léger, JM                                                                                          | 2015 |
| Hydromorphone for neuropathic pain in adults                                                                                                                 | Stannard, , C, Gaskell, H, Derry, S, Aldington, D, Cole, P, Cooper, TE, Knaggs, R, Wiffen, PJ; Moore, RA                                         | 2016 |
| Individual patient education for low back pain                                                                                                               | Engers, , AJ, Jellema, P, Wensing, M, van der Windt, DAWM, Grol, R; van Tulder, MW                                                               | 2008 |
| Immunosuppressive treatment for focal segmental glomerulosclerosis in adults                                                                                 | Braun, , N, Schmutzler, F, Lange, C, Perna, A, Remuzzi, G; Willis, NS                                                                            | 2008 |
| Inhaled corticosteroids for subacute cough in children                                                                                                       | Anderson-James, , S, Marchant, JM, Acworth, JP, Turner, C; Chang, AB                                                                             | 2013 |
| Horse chestnut seed extract for chronic venous insufficiency                                                                                                 | Pittler, , MH; Ernst, E                                                                                                                          | 2012 |
| Human growth hormone and glutamine for patients with short bowel syndrome                                                                                    | Wales, , PW, Nasr, A, de Silva, N; Yamada, J                                                                                                     | 2010 |
| Impact of institutional smoking bans on reducing harms and secondhand smoke exposure                                                                         | Frazer, , K, McHugh, J, Callinan, JE; Kelleher, C                                                                                                | 2016 |
| Immunotherapy (oral and sublingual) for food allergy to fruits                                                                                               | Yepes-Núñez, , JJ, Zhang, Y, Roqué i Figuls, M, Bartra Tomas, J, Reyes, JM, Pineda de la Losa, F; Enrique, E                                     | 2015 |
| Inhaled corticosteroids for subacute and chronic cough in adults                                                                                             | Johnstone, , KJ, Chang, AB, Fong, KM, Bowman, RV; Yang, IA                                                                                       | 2013 |
| Inhaled corticosteroids for cystic fibrosis                                                                                                                  | Balfour-Lynn, , IM, Welch, K; Smith, S                                                                                                           | 2019 |
| Impact of Haemophilus influenzae type B (Hib) and viral influenza vaccinations in pregnancy for improving maternal, neonatal and infant health outcomes      | Salam, , RA, Das, JK, Dojo Soeandy, C, Lassi, ZS; Bhutta, ZA                                                                                     | 2015 |
| Immunosuppressive treatment for proliferative lupus nephritis                                                                                                | Tunnicliffe, , DJ, Palmer, SC, Henderson, L, Masson, P, Craig, JC, Tong, A, Singh-Grewal, D, Flanc, RS, Roberts, MA, Webster, AC; Strippoli, GFM | 2018 |
| Hydroxyethyl starch (HES) versus other fluid therapies: effects on kidney function                                                                           | Mutter, , TC, Ruth, CA; Dart, AB                                                                                                                 | 2013 |
| Inpatient versus other settings for detoxification for opioid dependence                                                                                     | Day, , E, Ison, J; Strang, J                                                                                                                     | 2005 |
| Individual psychodynamic psychotherapy and psychoanalysis for schizophrenia and severe mental illness                                                        | Malmberg, , L, Fenton, M; Rathbone, J                                                                                                            | 2001 |
| Inspiratory muscle training for the recovery of function after stroke                                                                                        | Xiao, , Y, Luo, M, Wang, J; Luo, H                                                                                                               | 2012 |
| Immunoglobulin prophylaxis in hematological malignancies and hematopoietic stem cell transplantation                                                         | Raanani, , P, Gafter-Gvili, A, Paul, M, Ben-Bassat, I, Leibovici, L; Shpilberg, O                                                                | 2008 |
| Hydrogel dressings for healing diabetic foot ulcers                                                                                                          | Dumville, , JC, O'Meara, S, Deshpande, S; Speak, K                                                                                               | 2013 |
| Inhaled mannitol for cystic fibrosis                                                                                                                         | Nevitt, , SJ, Thornton, J, Murray, CS; Dwyer, T                                                                                                  | 2018 |
| Imiquimod for anogenital warts in non-immunocompromised adults                                                                                               | Grillo-Ardila, , CF, Angel-Müller, E, Salazar-Díaz, LC, Gaitán, HG, Ruiz-Parra, AI; Lethaby, A                                                   | 2014 |
| Influenza vaccination for healthcare workers who care for people aged 60 or older living in long-term care institutions                                      | Thomas, , RE, Jefferson, T; Lasserson, TJ                                                                                                        | 2016 |
| Hyperbaric oxygen therapy for acute ischaemic stroke                                                                                                         | Bennett, , MH, Weibel, S, Wasiak, J, Schnabel, A, French, C; Kranke, P                                                                           | 2014 |
| Infant pacifiers for reduction in risk of sudden infant death syndrome                                                                                       | Psaila, , K, Foster, JP, Pulbrook, N; Jeffery, HE                                                                                                | 2017 |
| Indoor residual spraying for preventing malaria in communities using insecticide-treated nets                                                                | Choi, , L, Pryce, J; Garner, P                                                                                                                   | 2019 |
| Hypofractionation for clinically localized prostate cancer                                                                                                   | Hickey, , BE, James, ML, Daly, T, Soh, FY; Jeffery, M                                                                                            | 2019 |

|                                                                                                                                                     |                                                                                                                                        |      |
|-----------------------------------------------------------------------------------------------------------------------------------------------------|----------------------------------------------------------------------------------------------------------------------------------------|------|
| Immunotherapy for metastatic renal cell carcinoma                                                                                                   | Unverzagt, , S, Moldenhauer, I, Nothacker, M, Roßmeißl, D, Hadjinicolaou, AV, Peinemann, F, Greco, F; Seliger, B                       | 2017 |
| Informant Questionnaire on Cognitive Decline in the Elderly (IQCODE) for the early diagnosis of dementia across a variety of healthcare settings    | Harrison, , JK, Stott, DJ, McShane, R, Noel-Storr, AH, Swann-Price, RS; Quinn, TJ                                                      | 2016 |
| Huperzine A for vascular dementia                                                                                                                   | Hao, , Z, Liu, M, Liu, Z; Lu, D                                                                                                        | 2009 |
| Infant formulas containing hydrolysed protein for prevention of allergic disease                                                                    | Osborn, , DA, Sinn, JKH; Jones, LJ                                                                                                     | 2018 |
| Ibuprofen and/or paracetamol (acetaminophen) for pain relief after surgical removal of lower wisdom teeth                                           | Bailey, , E, Worthington, HV, van Wijk, A, Yates, JM, Coulthard, P; Afzal, Z                                                           | 2013 |
| Hyperbaric oxygen therapy for the adjunctive treatment of traumatic brain injury                                                                    | Bennett, , MH, Trytko, B; Jonker, B                                                                                                    | 2012 |
| Infant position in neonates receiving mechanical ventilation                                                                                        | Rivas-Fernandez, , M, Roqué i Figuls, M, Diez-Izquierdo, A, Escribano, J; Balaguer, A                                                  | 2016 |
| Inhaled corticosteroids in children with persistent asthma: dose-response effects on growth                                                         | Pruteanu, , AI, Chauhan, BF, Zhang, L, Prietsch, SOM; Ducharme, FM                                                                     | 2014 |
| Inhaled steroids for acute asthma following emergency department discharge                                                                          | Edmonds, , ML, Milan, SJ, Brenner, BE, Camargo Jr, CA; Rowe, BH                                                                        | 2012 |
| Hyperbaric oxygen therapy for treating acute surgical and traumatic wounds                                                                          | Eskes, , A, Vermeulen, H, Lucas, C; Ubbink, DT                                                                                         | 2013 |
| Human albumin for intradialytic hypotension in haemodialysis patients                                                                               | Fortin, , PM, Bassett, K; Musini, VM                                                                                                   | 2010 |
| Indigenous healthcare worker involvement for Indigenous adults and children with asthma                                                             | Chang, , AB, Taylor, B, Masters, IB, Laifoo, Y; Brown, ADH                                                                             | 2010 |
| Incentives for preventing smoking in children and adolescents                                                                                       | Hefler, , M, Liberato, SC; Thomas, DP                                                                                                  | 2017 |
| Immediate referral to colposcopy versus cytological surveillance for minor cervical cytological abnormalities in the absence of HPV test            | Kyrgiou, , M, Kalliala, IEJ, Mitra, A, Fotopoulou, C, Ghaem-Maghami, S, Martin-Hirsch, PPL, Cruickshank, M, Arbyn, M; Paraskevaidis, E | 2017 |
| Ibuprofen for the treatment of patent ductus arteriosus in preterm or low birth weight (or both) infants                                            | Ohlsson, , A, Walia, R; Shah, SS                                                                                                       | 2018 |
| Implantable defibrillators versus medical therapy for cardiac channelopathies                                                                       | McNamara, , DA, Goldberger, JJ, Berendsen, MA; Huffman, MD                                                                             | 2015 |
| Immunosuppressive agents for myasthenia gravis                                                                                                      | Hart, , IK, Sathasivam, S; Sharshar, T                                                                                                 | 2007 |
| Immersion in water during labour and birth                                                                                                          | Cluett, , ER, Burns, E; Cuthbert, A                                                                                                    | 2018 |
| Information provision for stroke patients and their caregivers                                                                                      | Forster, , A, Brown, L, Smith, J, House, A, Knapp, P, Wright, JJ; Young, J                                                             | 2012 |
| Hyperbaric oxygenation for tumour sensitisation to radiotherapy                                                                                     | Bennett, , MH, Feldmeier, J, Smee, R; Milross, C                                                                                       | 2018 |
| Immediate versus deferred zidovudine (AZT) in asymptomatic or mildly symptomatic HIV infected adults                                                | Darbyshire, , J, Foulkes, M, Peto, R, Duncan, W, Babiker, A, Collins, R, Hughes, M, Peto, TEA; Walker, SA                              | 2000 |
| Inhaled antibiotics for pulmonary exacerbations in cystic fibrosis                                                                                  | Smith, , S, Rowbotham, NJ; Charbek, E                                                                                                  | 2018 |
| Hyperbaric oxygen as an adjuvant treatment for malignant otitis externa                                                                             | Phillips, , JS; Jones, SEM                                                                                                             | 2013 |
| Informant Questionnaire on Cognitive Decline in the Elderly (IQCODE) for the diagnosis of dementia within a secondary care setting                  | Harrison, , JK, Fearon, P, Noel-Storr, AH, McShane, R, Stott, DJ; Quinn, TJ                                                            | 2015 |
| Informant Questionnaire on Cognitive Decline in the Elderly (IQCODE) for the diagnosis of dementia within a general practice (primary care) setting | Harrison, , JK, Fearon, P, Noel-Storr, AH, McShane, R, Stott, DJ; Quinn, TJ                                                            | 2014 |
| Humanized PA14 (a monoclonal CCR5 antibody) for treatment of people with HIV infection                                                              | Li, , L, Tian, JH, Yang, K, Zhang, P; Jia, WQ                                                                                          | 2014 |
| Industry sponsorship and research outcome                                                                                                           | Lundh, , A, Lexchin, J, Mintzes, B, Schroll, JB; Bero, L                                                                               | 2017 |
| Immunosuppressive and cytotoxic therapy for pulmonary sarcoidosis                                                                                   | Paramothayan, , NS, Lasserson, TJ; Walters, EH                                                                                         | 2006 |
| Inositol in preterm infants at risk for or having respiratory distress syndrome                                                                     | Howlett, , A, Ohlsson, A; Plakkal, N                                                                                                   | 2019 |
| Inhaled anti-pseudomonal antibiotics for long-term therapy in cystic fibrosis                                                                       | Smith, , S, Rowbotham, NJ; Regan, KH                                                                                                   | 2018 |
| Individual participant data meta-analyses compared with meta-analyses based on aggregate data                                                       | Tudur Smith, , C, Marcucci, M, Nolan, SJ, Iorio, A, Sudell, M, Riley, R, Rovers, MM; Williamson, PR                                    | 2016 |
| Immediate antiepileptic drug treatment, versus placebo, deferred, or no treatment for first unprovoked seizure                                      | Leone, , MA, Giussani, G, Nevitt, SJ, Marson, AG; Beghi, E                                                                             | 2016 |
| Identification of children in the first four years of life for early treatment for otitis media with effusion                                       | Simpson, , SA, Thomas, CL, van der Linden, M, MacMillan, H, van der Wouden, JC; Butler, CC                                             | 2007 |
| Huperzine A for mild cognitive impairment                                                                                                           | Yue, , J, Dong, BR, Lin, X, Yang, M, Wu, HM; Wu, T                                                                                     | 2012 |
| Influenza vaccine for chronic obstructive pulmonary disease (COPD)                                                                                  | Kopsaftis, , Z, Wood-Baker, R; Poole, P                                                                                                | 2018 |
| Increasing antipsychotic dose for non response in schizophrenia                                                                                     | Samara, , MT, Klupp, E, Helfer, B, Rothe, PH, Schneider-Thoma, J; Leucht, S                                                            | 2018 |
| Inhaled hyperosmolar agents for bronchiectasis                                                                                                      | Hart, , A, Sugumar, K, Milan, SJ, Fowler, SJ; Crossingham, I                                                                           | 2014 |
| Hormone therapy for sexual function in perimenopausal and postmenopausal women                                                                      | Nastri, , CO, Lara, LA, Ferriani, RA, Rosa-e-Silva, ACJS, Figueiredo, JBP; Martins, WP                                                 | 2013 |
| Inferior turbinate surgery for nasal obstruction in allergic rhinitis after failed medical treatment                                                | Jose, , J; Coatesworth, AP                                                                                                             | 2010 |

|                                                                                                                                          |                                                                                                                                                                              |      |
|------------------------------------------------------------------------------------------------------------------------------------------|------------------------------------------------------------------------------------------------------------------------------------------------------------------------------|------|
| Hormone replacement therapy for women previously treated for endometrial cancer                                                          | Edey, , KA, Rundle, S; Hickey, M                                                                                                                                             | 2018 |
| Immunosuppressive drug therapy for preventing rejection following lung transplantation in cystic fibrosis                                | Saldanha, , IJ, Akinyede, O; Robinson, KA                                                                                                                                    | 2018 |
| Increased police patrols for preventing alcohol-impaired driving                                                                         | Goss, , CW, Van Bramer, LD, Gliner, JA, Porter, TR, Roberts, IG; DiGuseppi, C                                                                                                | 2008 |
| Informant Questionnaire on Cognitive Decline in the Elderly (IQCODE) for the diagnosis of dementia within community dwelling populations | Quinn, , TJ, Fearon, P, Noel-Storr, AH, Young, C, McShane, R; Stott, DJ                                                                                                      | 2014 |
| Immunonutrition as an adjuvant therapy for burns                                                                                         | Tan, , HB, Danilla, S, Murray, A, Serra, R, El Dib, R, Henderson, TOW; Wasiak, J                                                                                             | 2014 |
| Immunoglobulins, vaccines or interferon for preventing cytomegalovirus disease in solid organ transplant recipients                      | Hodson, , EM, Jones, CA, Strippoli, GFM, Webster, AC; Craig, JC                                                                                                              | 2007 |
| Impact of medication reconciliation for improving transitions of care                                                                    | Redmond, , P, Grimes, TC, McDonnell, R, Boland, F, Hughes, C; Fahey, T                                                                                                       | 2018 |
| Insecticide-treated nets for preventing malaria                                                                                          | Pryce, , J, Richardson, M; Lengeler, C                                                                                                                                       | 2018 |
| Inhaled corticosteroids versus long-acting beta2-agonists for chronic obstructive pulmonary disease                                      | Spencer, , S, Karner, C, Cates, CJ; Evans, DJ                                                                                                                                | 2011 |
| Impact of public release of performance data on the behaviour of healthcare consumers and providers                                      | Metcalfe, , D, Rios Diaz, AJ, Olufajo, OA, Massa, MS, Ketelaar, NABM, Flottorp, SA; Perry, DC                                                                                | 2018 |
| Immunosuppressive T-cell antibody induction for heart transplant recipients                                                              | Penninga, , L, Möller, CH, Gustafsson, F, Gluud, C; Steinbrüchel, DA                                                                                                         | 2013 |
| Incentives for increasing prenatal care use by women in order to improve maternal and neonatal outcomes                                  | Till, , SR, Everetts, D; Haas, DM                                                                                                                                            | 2015 |
| Inhaled nitric oxide for acute respiratory distress syndrome (ARDS) in children and adults                                               | Gebistorf, , F, Karam, O, Wetterslev, J; Afshari, A                                                                                                                          | 2016 |
| Hospitalisation in short-stay units for adults with internal medicine diseases and conditions                                            | Strøm, , C, Stefansson, JS, Fabritius, ML, Rasmussen, LS, Schmidt, TA; Jakobsen, JC                                                                                          | 2018 |
| Inositol for subfertile women with polycystic ovary syndrome                                                                             | Showell, , MG, Mackenzie-Proctor, R, Jordan, V, Hodgson, R; Farquhar, C                                                                                                      | 2018 |
| Individual-, family-, and school-level interventions targeting multiple risk behaviours in young people                                  | MacArthur, , G, Caldwell, DM, Redmore, J, Watkins, SH, Kipping, R, White, J, Chittleborough, C, Langford, R, Er, V, Lingam, R, Pasch, K, Gunnell, D, Hickman, M; Campbell, R | 2018 |
| Hysteroscopy for treating subfertility associated with suspected major uterine cavity abnormalities                                      | Bosteels, , J, van Wessel, S, Weyers, S, Broekmans, FJ, D'Hooghe, TM, Bongers, MY; Mol, BWJ                                                                                  | 2018 |
| Hydroxyurea for reducing blood transfusion in non-transfusion dependent beta thalassaemias                                               | Foong, , WC, Ho, JJ, Loh, CK; Viprasak, V                                                                                                                                    | 2016 |
| Housing improvements for health and associated socio-economic outcomes                                                                   | Thomson, , H, Thomas, S, Sellstrom, E; Petticrew, M                                                                                                                          | 2013 |
| Increased consumption of fruit and vegetables for the primary prevention of cardiovascular diseases                                      | Hartley, , L, Igbinedion, E, Holmes, J, Flowers, N, Thorogood, M, Clarke, A, Stranges, S, Hooper, L; Rees, K                                                                 | 2013 |
| Inhaled corticosteroids for non-specific chronic cough in children                                                                       | Tomerak, , AAT, McGlashan, J, Lakhanpaul, M, Vyas, HHV; McKean, MC                                                                                                           | 2005 |
| House dust mite reduction and avoidance measures for treating eczema                                                                     | Nankervis, , H, Pynn, EV, Boyle, RJ, Rushton, L, Williams, HC, Hewson, DM; Platts-Mills, T                                                                                   | 2015 |
| Immunonutrition for patients undergoing surgery for head and neck cancer                                                                 | Howes, , N, Atkinson, C, Thomas, S; Lewis, SJ                                                                                                                                | 2018 |
| Insulin and glucose-lowering agents for treating people with diabetes and chronic kidney disease                                         | Lo, , C, Toyama, T, Wang, Y, Lin, J, Hirakawa, Y, Jun, M, Cass, A, Hawley, CM, Pilmore, H, Badve, SV, Perkovic, V; Zoungas, S                                                | 2018 |
| Inhaled corticosteroids for bronchiectasis                                                                                               | Kapur, , N, Petsky, HL, Bell, S, Kolbe, J; Chang, AB                                                                                                                         | 2018 |
| Incentives for smoking cessation                                                                                                         | Notley, , C, Gentry, S, Livingstone-Banks, J, Bauld, L, Perera, R; Hartmann-Boyce, J                                                                                         | 2019 |
| Hysterectomy with opportunistic salpingectomy versus hysterectomy alone                                                                  | van Lieshout, , LAM, Steenbeek, MP, De Hullu, JA, Vos, MC, Houterman, S, Wilkinson, J; Piek, JMJ                                                                             | 2019 |
| Ibuprofen for Alzheimer's disease                                                                                                        | Tabet, , N; Feldman, H                                                                                                                                                       | 2003 |
| Information or education interventions for adult intensive care unit (ICU) patients and their carers                                     | Lewis, , SR, Pritchard, MW, Schofield-Robinson, OJ, Evans, DJW, Alderson, P; Smith, AF                                                                                       | 2018 |
| Intermittent drug techniques for schizophrenia                                                                                           | Sampson, , S, Mansour, M, Maayan, N, Soares-Weiser, K; Adams, CE                                                                                                             | 2013 |
| Interventions for preventing unintended pregnancies among adolescents                                                                    | Oringanje, , C, Meremikwu, MM, Eko, H, Esu, E, Meremikwu, A; Ehiri, JE                                                                                                       | 2016 |
| Interventions for acute otitis externa                                                                                                   | Kaushik, , V, Malik, T; Saeed, SR                                                                                                                                            | 2010 |
| Interventions for increasing the proportion of health professionals practising in rural and other underserved areas                      | Grobler, , L, Marais, BJ; Mabunda, S                                                                                                                                         | 2015 |
| Intermediate acting versus long acting insulin for type 1 diabetes mellitus                                                              | Vardi, , M, Jacobson, E, Nini, A; Bitterman, H                                                                                                                               | 2008 |
| Interventions for improving sit-to-stand ability following stroke                                                                        | Pollock, , A, Gray, C, Culham, E, Durward, BR; Langhorne, P                                                                                                                  | 2014 |
| Interferon Beta for Primary Progressive Multiple Sclerosis                                                                               | Rojas, , JI, Romano, M, Ciapponi, A, Patrucco, L; Cristiano, E                                                                                                               | 2010 |
| Interventions for encouraging sexual behaviours intended to prevent cervical cancer                                                      | Shepherd, , JP, Frampton, GK; Harris, P                                                                                                                                      | 2011 |
| Interventions for educating children who are at risk of asthma-related emergency department attendance                                   | Boyd, , M, Lasserson, TJ, McKean, MC, Gibson, PG, Ducharme, FM; Haby, M                                                                                                      | 2009 |
| Interventions for latent autoimmune diabetes (LADA) in adults                                                                            | Brophy, , S, Davies, H, Mannan, S, Brunt, H; Williams, R                                                                                                                     | 2011 |

|                                                                                                                                                                                             |                                                                                                                                          |      |
|---------------------------------------------------------------------------------------------------------------------------------------------------------------------------------------------|------------------------------------------------------------------------------------------------------------------------------------------|------|
| Integrated versus non-integrated orbital implants for treating anophthalmic sockets                                                                                                         | Schellini, , S, El Dib, R, Silva, LRE, Farat, JG, Zhang, Y; Jorge, EC                                                                    | 2016 |
| Interventions for preventing delirium in older people in institutional long-term care                                                                                                       | Woodhouse, , R, Burton, JK, Rana, N, Pang, YL, Lister, JE; Siddiqi, N                                                                    | 2019 |
| Interventions for prevention of giant retinal tear in the fellow eye                                                                                                                        | Ang, , GS, Townend, J; Lois, N                                                                                                           | 2012 |
| Insulin-sensitising drugs (metformin, rosiglitazone, pioglitazone, D-chiro-inositol) for women with polycystic ovary syndrome, oligo amenorrhoea and subfertility                           | Morley, , LC, Tang, T, Yasmin, E, Norman, RJ; Balen, AH                                                                                  | 2017 |
| Interventions for prevention of neonatal hyperglycemia in very low birth weight infants                                                                                                     | Sinclair, , JC, Bottino, M; Cowett, RM                                                                                                   | 2011 |
| Interventions for preventing and managing advanced liver disease in cystic fibrosis                                                                                                         | Palaniappan, , SK, Than, NN, Thein, AW, Moe, S; van Mourik, I                                                                            | 2017 |
| Interventions for cutaneous molluscum contagiosum                                                                                                                                           | van der Wouden, , JC, van der Sande, R, Kruithof, EJ, Sollie, A, van Suijlekom-Smit, LWA; Koning, S                                      | 2017 |
| Interventions for mycosis fungoides                                                                                                                                                         | Weberschock, , T, Strametz, R, Lorenz, M, Röllig, C, Bunch, C, Bauer, A; Schmitt, J                                                      | 2012 |
| Insulin-sensitising drugs versus the combined oral contraceptive pill for hirsutism, acne and risk of diabetes, cardiovascular disease, and endometrial cancer in polycystic ovary syndrome | Costello, , MF, Shrestha, B, Eden, J, Johnson, N; Moran, LJ                                                                              | 2007 |
| Intermittent versus daily therapy for treating tuberculosis in children                                                                                                                     | Bose, , A, Kalita, S, Rose, W; Tharyan, P                                                                                                | 2014 |
| Interventions for chronic blepharitis                                                                                                                                                       | Lindsley, , K, Matsumura, S, Hatef, E; Akpek, EK                                                                                         | 2012 |
| Intensive glucose control versus conventional glucose control for type 1 diabetes mellitus                                                                                                  | Fullerton, , B, Jeitler, K, Seitz, M, Horvath, K, Berghold, A; Siebenhofer, A                                                            | 2014 |
| Interventions for dysphagia in oesophageal cancer                                                                                                                                           | Dai, , Y, Li, C, Xie, Y, Liu, X, Zhang, J, Zhou, J, Pan, X; Yang, S                                                                      | 2014 |
| Interventions for fatigue in Parkinson's disease                                                                                                                                            | Elbers, , RG, Verhoef, J, van Wegen, EEH, Berendse, HW; Kwakkel, G                                                                       | 2015 |
| Interventions for managing relapse of the lower front teeth after orthodontic treatment                                                                                                     | Yu, , Y, Sun, J, Lai, W, Wu, T, Koshy, S; Shi, Z                                                                                         | 2013 |
| Integrating prevention of mother-to-child HIV transmission (PMTCT) programmes with other health services for preventing HIV infection and improving HIV outcomes in developing countries    | Tudor Car, , L, van-Velthoven, MHMMT, Brusamento, S, Elmoniry, H, Car, J, Majeed, A; Atun, R                                             | 2011 |
| Interventions for melanoma in situ, including lentigo maligna                                                                                                                               | Tzellos, , T, Kyrgidis, A, Mocellin, S, Chan, AW, Pilati, P; Apalla, Z                                                                   | 2014 |
| Interventions for impetigo                                                                                                                                                                  | Koning, , S, van der Sande, R, Verhagen, AP, van Suijlekom-Smit, LWA, Morris, AD, Butler, CC, Berger, M; van der Wouden, JC              | 2012 |
| Interventions for disorders of eye movement in patients with stroke                                                                                                                         | Pollock, , A, Hazelton, C, Henderson, CA, Angilley, J, Dhillon, B, Langhorne, P, Livingstone, K, Munro, FA, Orr, H, Rowe, FJ; Shahani, U | 2011 |
| Interventions for preventing critical illness polyneuropathy and critical illness myopathy                                                                                                  | Hermans, , G, De Jonghe, B, Bruyninckx, F; Van den Berghe, G                                                                             | 2014 |
| Interventions for preventing voice disorders in adults                                                                                                                                      | Ruotsalainen, , JH, Sellman, J, Lehto, L, Isotalo, LK; Verbeek, JH                                                                       | 2007 |
| Interventions for helping people adhere to compression treatments for venous leg ulceration                                                                                                 | Weller, , CD, Buchbinder, R; Johnston, RV                                                                                                | 2016 |
| Internal versus external tocodynamometry during induced or augmented labour                                                                                                                 | Bakker, , JJH, Janssen, PF, van Halem, K, van der Goes, BY, Papatsonis, DNM, van der Post, JAM; Mol, BWJ                                 | 2013 |
| Intermittent inhaled corticosteroid therapy versus placebo for persistent asthma in children and adults                                                                                     | Chong, , J, Haran, C, Chauhan, BF; Asher, I                                                                                              | 2015 |
| Interventions for intermittent exotropia                                                                                                                                                    | Hatt, , SR; Gnanaraj, L                                                                                                                  | 2013 |
| Intermittent oral iron supplementation during pregnancy                                                                                                                                     | Peña-Rosas, , JP, De-Regil, LM, Gomez Malave, H, Flores-Urrutia, MC; Dowswell, T                                                         | 2015 |
| Interventions for increasing ankle range of motion in patients with neuromuscular disease                                                                                                   | Rose, , KJ, Burns, J, Wheeler, DM; North, KN                                                                                             | 2010 |
| Interventions for pityriasis rosea                                                                                                                                                          | Chuh, , AAT, Dofitas, BL, Comisel, G, Reveiz, L, Sharma, V, Garner, SE; Chu, FKM                                                         | 2007 |
| Interferon alpha for chronic hepatitis D                                                                                                                                                    | Abbas, , Z, Khan, MA, Salih, M; Jafri, W                                                                                                 | 2011 |
| Interventions for promoting reintegration and reducing harmful behaviour and lifestyles in street-connected children and young people                                                       | Coren, , E, Hossain, R, Pardo Pardo, J; Bakker, B                                                                                        | 2016 |
| Interventions for dysarthria due to stroke and other adult-acquired, non-progressive brain injury                                                                                           | Mitchell, , C, Bowen, A, Tyson, S, Butterfint, Z; Conroy, P                                                                              | 2017 |
| Interventions for pemphigus vulgaris and pemphigus foliaceus                                                                                                                                | Martin, , LK, Agero, AL, Werth, V, Villanueva, E, Segall, J; Murrell, DF                                                                 | 2009 |
| Interventions for preventing abuse in the elderly                                                                                                                                           | Baker, , PRA, Francis, DP, Hairi, NN, Othman, S; Choo, WY                                                                                | 2016 |
| Interventions for improving adherence to treatment recommendations in people with type 2 diabetes mellitus                                                                                  | Vermeire, , EIJJ, Wens, J, Van Royen, P, Biot, Y, Hearnshaw, H; Lindenmeyer, A                                                           | 2005 |
| Interventions for improving coverage of childhood immunisation in low- and middle-income countries                                                                                          | Oyo-Ita, , A, Wiysonge, CS, Oranganje, C, Nwachukwu, CE, Oduwale, O; Meremikwu, MM                                                       | 2016 |
| Interventions for iatrogenic inferior alveolar and lingual nerve injury                                                                                                                     | Coulthard, , P, Kushnerev, E, Yates, JM, Walsh, T, Patel, N, Bailey, E; Renton, TF                                                       | 2014 |
| Interventions for atrophic rhinitis                                                                                                                                                         | Mishra, , A, Kawatra, R; Gola, M                                                                                                         | 2012 |

|                                                                                                                                               |                                                                                                                                          |      |
|-----------------------------------------------------------------------------------------------------------------------------------------------|------------------------------------------------------------------------------------------------------------------------------------------|------|
| Interactive computer-based interventions for sexual health promotion                                                                          | Bailey, , JV, Murray, E, Rait, G, Mercer, CH, Morris, RW, Peacock, R, Cassell, J; Nazareth, I                                            | 2010 |
| Interventions for dysphagia in long-term, progressive muscle disease                                                                          | Jones, , K, Pitceathly, RDS, Rose, MR, McGowan, S, Hill, M, Badrising, UA; Hughes, T                                                     | 2016 |
| Interventions for clinical and subclinical hypothyroidism pre-pregnancy and during pregnancy                                                  | Reid, , SM, Middleton, P, Cossich, MC, Crowther, CA; Bain, E                                                                             | 2013 |
| Interactive computer-based interventions for weight loss or weight maintenance in overweight or obese people                                  | Wieland, , LS, Falzon, L, Sciamanna, CN, Trudeau, KJ, Brodney Folse, S, Schwartz, JE; Davidson, KW                                       | 2012 |
| Interventions for lowering plasma homocysteine levels in dialysis patients                                                                    | Nigwekar, , SU, Kang, A, Zoungas, S, Cass, A, Gallagher, MP, Kulshrestha, S, Navaneethan, SD, Perkovic, V, Strippoli, GFM; Jardine, MJ   | 2016 |
| Intermittent versus continuous androgen suppression for prostatic cancer                                                                      | De Conti, , P, Atallah, AN, Arruda, HO, Soares, BGO, El Dib, RP; Wilt, TJ                                                                | 2007 |
| Interventions for prevention and treatment of vulvovaginal candidiasis in women with HIV infection                                            | Ray, , A, Ray, S, George, AT; Swaminathan, N                                                                                             | 2011 |
| Interventions for congenital talipes equinovarus (clubfoot)                                                                                   | Gray, , K, Pacey, V, Gibbons, P, Little, D; Burns, J                                                                                     | 2014 |
| Interventions for age-related visual problems in patients with stroke                                                                         | Pollock, , A, Hazelton, C, Henderson, CA, Angilley, J, Dhillon, B, Langhorne, P, Livingstone, K, Munro, FA, Orr, H, Rowe, FJ; Shahani, U | 2012 |
| Interventions for preventing silent cerebral infarcts in people with sickle cell disease                                                      | Estcourt, , LJ, Fortin, PM, Hopewell, S, Trivella, M, Doree, C; Abboud, MR                                                               | 2017 |
| Interventions for infantile esotropia                                                                                                         | Elliott, , S; Shafiq, A                                                                                                                  | 2013 |
| Interventions for preoperative smoking cessation                                                                                              | Thomsen, , T, Villebro, N; Møller, AM                                                                                                    | 2014 |
| Interventions for bullous pemphigoid                                                                                                          | Kirtschig, , G, Middleton, P, Bennett, C, Murrell, DF, Wojnarowska, F; Khumalo, NP                                                       | 2010 |
| Interventions for preventing bone disease in kidney transplant recipients                                                                     | Palmer, , SC, McGregor, DO; Strippoli, GFM                                                                                               | 2007 |
| Interventions for erosive lichen planus affecting mucosal sites                                                                               | Cheng, , S, Kirtschig, G, Cooper, S, Thornhill, M, Leonardi-Bee, J; Murphy, R                                                            | 2012 |
| Interprofessional education: effects on professional practice and healthcare outcomes                                                         | Reeves, , S, Perrier, L, Goldman, J, Freeth, D; Zwarenstein, M                                                                           | 2013 |
| Interventions for basal cell carcinoma of the skin                                                                                            | Bath-Hextall, , FJ, Perkins, W, Bong, J; Williams, HC                                                                                    | 2007 |
| Interventions for central serous chorioretinopathy: a network meta-analysis                                                                   | Salehi, , M, Wenick, AS, Law, HA, Evans, JR; Gehlbach, P                                                                                 | 2015 |
| Interventions for drug-using offenders with co-occurring mental illness                                                                       | Perry, , AE, Neilson, M, Martyn-St James, M, Glanville, JM, Woodhouse, R, Godfrey, C; Hewitt, C                                          | 2015 |
| Interventions for promoting participation in shared decision-making for children with cancer                                                  | Coyne, , I, O'Mathúna, DP, Gibson, F, Shields, L, Leclercq, E; Sheaf, G                                                                  | 2016 |
| Interventions for non-metastatic squamous cell carcinoma of the skin                                                                          | Lansbury, , L, Leonardi-Bee, J, Perkins, W, Goodacre, T, Tweed, JA; Bath-Hextall, FJ                                                     | 2010 |
| Interventions for preventing depression after stroke                                                                                          | Hackett, , ML, Anderson, CS, House, A; Halteh, C                                                                                         | 2008 |
| Interventions for nail psoriasis                                                                                                              | de Vries, , ACQ, Bogaards, NA, Hooft, L, Velema, M, Pasch, M, Lebwohl, M; Spuls, PI                                                      | 2013 |
| Interventions for men and women with their first episode of genital herpes                                                                    | Heslop, , R, Roberts, H, Flower, D; Jordan, V                                                                                            | 2016 |
| Interventions for cutaneous Bowen's disease                                                                                                   | Bath-Hextall, , FJ, Matin, RN, Wilkinson, D; Leonardi-Bee, J                                                                             | 2013 |
| Interventions for preventing relapse and recurrence of a depressive disorder in children and adolescents                                      | Cox, , GR, Fisher, CA, De Silva, S, Phelan, M, Akinwale, OP, Simmons, MB; Hetrick, SE                                                    | 2012 |
| Interventions for preventing or reducing domestic violence against pregnant women                                                             | Jahanfar, , S, Howard, LM; Medley, N                                                                                                     | 2014 |
| Interventions for acute auricular haematoma                                                                                                   | Jones, , SEM; Mahendran, S                                                                                                               | 2004 |
| Interventions for cellulitis and erysipelas                                                                                                   | Kilburn, , SA, Featherstone, P, Higgins, B; Brindle, R                                                                                   | 2010 |
| Interventions for preventing and treating cardiac complications in Duchenne and Becker muscular dystrophy and X-linked dilated cardiomyopathy | Bourke, , JP, Bueser, T; Quinlivan, R                                                                                                    | 2018 |
| Interventions for female pattern hair loss                                                                                                    | van Zuuren, , EJ, Fedorowicz, Z; Schoones, J                                                                                             | 2016 |
| Interventions for ingrowing toenails                                                                                                          | Eekhof, , JAH, Van Wijk, B, Knuistingh Neven, A; van der Wouden, JC                                                                      | 2012 |
| Interventions for involutional lower lid entropion                                                                                            | Boboridis, , KG; Bunce, C                                                                                                                | 2011 |
| Interventions for improving outcomes in patients with multimorbidity in primary care and community settings                                   | Smith, , SM, Wallace, E, O'Dowd, T; Fortin, M                                                                                            | 2016 |
| Interventions for improving patients' trust in doctors and groups of doctors                                                                  | Rolfe, , A, Cash-Gibson, L, Car, J, Sheikh, A; McKinstry, B                                                                              | 2014 |
| Interventions for melasma                                                                                                                     | Rajaratnam, , R, Halpern, J, Salim, A; Emmett, C                                                                                         | 2010 |
| Interventions for minimal change disease in adults with nephrotic syndrome                                                                    | Palmer, , SC, Nand, K; Strippoli, GFM                                                                                                    | 2008 |
| Interventions for acne scars                                                                                                                  | Abdel Hay, , R, Shalaby, K, Zaher, H, Hafez, V, Chi, CC, Dimitri, S, Nabhan, AF; Layton, AM                                              | 2016 |



|                                                                                                                                                                                       |                                                                                                                                                     |      |
|---------------------------------------------------------------------------------------------------------------------------------------------------------------------------------------|-----------------------------------------------------------------------------------------------------------------------------------------------------|------|
| Interventions for preventing infection in nephrotic syndrome                                                                                                                          | Wu, , HM, Tang, JL, Cao, L, Sha, ZH; Li, Y                                                                                                          | 2012 |
| Interventions for promoting physical activity in people with cystic fibrosis                                                                                                          | Cox, , NS, Alison, JA; Holland, AE                                                                                                                  | 2013 |
| Interventions for prophylaxis of hepatic veno-occlusive disease in people undergoing haematopoietic stem cell transplantation                                                         | Cheuk, , DKL, Chiang, AKS, Ha, SY; Chan, GCF                                                                                                        | 2015 |
| Interventions for promoting participation in shared decision-making for children and adolescents with cystic fibrosis                                                                 | Malone, , H, Biggar, S, Javadpour, S, Edworthy, Z, Sheaf, G; Coyne, I                                                                               | 2019 |
| Interventions for chronic palmoplantar pustulosis                                                                                                                                     | Chalmers, , R, Hollis, S, Leonardi-Bee, J, Griffiths, CEM; Marsland Bsc MRCP, A                                                                     | 2006 |
| Interventions for primary prevention of suicide in university and other post-secondary educational settings                                                                           | Harrod, , CS, Goss, CW, Stallones, L; DiGuseppi, C                                                                                                  | 2014 |
| Interventions for covert bacteriuria in children                                                                                                                                      | Fitzgerald, , A, Mori, R; Lakhanpaul, M                                                                                                             | 2012 |
| Intermittent iron supplementation for improving nutrition and development in children under 12 years of age                                                                           | De-Regil, , LM, Jefferds, MED, Sylvetsky, AC; Dowswell, T                                                                                           | 2011 |
| Interventions for actinic keratoses                                                                                                                                                   | Gupta, , AK, Paquet, M, Villanueva, E; Brintnell, W                                                                                                 | 2012 |
| Interventions for alopecia areata                                                                                                                                                     | Delamere, , FM, Sladden, MJ, Dobbins, HM; Leonardi-Bee, J                                                                                           | 2008 |
| Interventions for improving the appropriate use of imaging in people with musculoskeletal conditions                                                                                  | French, , SD, Green, S, Buchbinder, R; Barnes, H                                                                                                    | 2010 |
| Interleukin-2 as an adjunct to antiretroviral therapy for HIV-positive adults                                                                                                         | Onwumeh, , J, Okwundu, CI; Kredo, T                                                                                                                 | 2017 |
| Intensive case management for severe mental illness                                                                                                                                   | Dieterich, , M, Irving, CB, Bergman, H, Khokhar, MA, Park, B; Marshall, M                                                                           | 2017 |
| Interventions for obtaining and maintaining employment in adults with severe mental illness, a network meta-analysis                                                                  | Suijkerbuijk, , YB, Schaafsma, FG, van Mechelen, JC, Ojajärvi, A, Corbière, M; Anema, JR                                                            | 2017 |
| Interferon in relapsing-remitting multiple sclerosis                                                                                                                                  | Rice, , GPA, Incorvaia, B, Munari, LM, Ebers, G, Polman, C, D'Amico, R, Parmelli, E; Filippini, G                                                   | 2001 |
| Interventions for leg cramps in pregnancy                                                                                                                                             | Zhou, , K, West, HM, Zhang, J, Xu, L; Li, W                                                                                                         | 2015 |
| Interventions for preventing high altitude illness: Part 2. Less commonly-used drugs                                                                                                  | Gonzalez Garay, , AG, Molano Franco, D, Nieto Estrada, VH, Marti-Carvajal, AJ; Arevalo-Rodriguez, I                                                 | 2018 |
| Interventions for Mooren's ulcer                                                                                                                                                      | Alhassan, , MB, Rabi, M; Agbabiaka, IO                                                                                                              | 2014 |
| Interventions for deliberately altering blood pressure in acute stroke                                                                                                                | Bath, , PMW; Krishnan, K                                                                                                                            | 2014 |
| Interventions based on the Theory of Mind cognitive model for autism spectrum disorder (ASD)                                                                                          | Fletcher-Watson, , S, McConnell, F, Manola, E; McConachie, H                                                                                        | 2014 |
| Interleukin 2 receptor antagonists for kidney transplant recipients                                                                                                                   | Webster, , AC, Ruster, LP, McGee, RG, Matheson, SL, Higgins, GY, Willis, NS, Chapman, JR; Craig, JC                                                 | 2010 |
| Intermittent preventive treatment for malaria in children living in areas with seasonal transmission                                                                                  | Meremikwu, , MM, Donegan, S, Sinclair, D, Esu, E; Oringanje, C                                                                                      | 2012 |
| Interventions for prevention of post-operative recurrence of Crohn's disease                                                                                                          | Doherty, , G, Bennett, G, Patil, S, Cheifetz, A; Moss, AC                                                                                           | 2009 |
| Interventions for enhancing consumers' online health literacy                                                                                                                         | Car, , J, Lang, B, Colledge, A, Ung, C; Majeed, A                                                                                                   | 2011 |
| Insulin monotherapy compared with the addition of oral glucose-lowering agents to insulin for people with type 2 diabetes already on insulin therapy and inadequate glycaemic control | Vos, , RC, van Avendonk, MJP, Jansen, H, Goudswaard, AN, van den Donk, M, Gorter, K, Kerssen, A; Rutten, GEHM                                       | 2016 |
| Interventions for preventing infectious complications in haemodialysis patients with central venous catheters                                                                         | McCann, , M; Moore, ZEH                                                                                                                             | 2010 |
| Interventions for preventing lower limb soft-tissue running injuries                                                                                                                  | Yeung, , SS, Yeung, EW; Gillespie, LD                                                                                                               | 2011 |
| Interventions for providers to promote a patient-centred approach in clinical consultations                                                                                           | Dwamena, , F, Holmes-Rovner, M, Gauden, CM, Jorgenson, S, Sadigh, G, Sikorskii, A, Lewin, S, Smith, RC, Coffey, J, Olomu, A; Beasley, M             | 2012 |
| Interventions for anal canal intraepithelial neoplasia                                                                                                                                | Macaya, , A, Muñoz-Santos, C, Balaguer, A; Barberà, MJ                                                                                              | 2012 |
| Interventions for preventing delirium in hospitalised non-ICU patients                                                                                                                | Siddiqi, , N, Harrison, JK, Clegg, A, Teale, EA, Young, J, Taylor, J; Simpkins, SA                                                                  | 2016 |
| Interventions for erythropoietin-resistant anaemia in dialysis patients                                                                                                               | Badve, , SV, Beller, EM, Cass, A, Francis, DP, Hawley, C, Macdougall, IC, Perkovic, V; Johnson, DW                                                  | 2013 |
| Interventions for primary (intrinsic) tracheomalacia in children                                                                                                                      | Goyal, , V, Masters, IB; Chang, AB                                                                                                                  | 2012 |
| Interventions for orbital lymphangioma                                                                                                                                                | Patel, , SR, Rosenberg, JB; Barmettler, A                                                                                                           | 2019 |
| Interventions for lowering plasma homocysteine levels in kidney transplant recipients                                                                                                 | Kang, , A, Nigwekar, SU, Perkovic, V, Kulshrestha, S, Zoungas, S, Navaneethan, SD, Cass, A, Gallagher, MP, Ninomiya, T, Strippoli, GFM; Jardine, MJ | 2015 |
| Interventions for preventing the progression of autosomal dominant polycystic kidney disease                                                                                          | Bolignano, , D, Palmer, SC, Ruospo, M, Zoccali, C, Craig, JC; Strippoli, GFM                                                                        | 2015 |
| Interventions for cleaning dentures in adults                                                                                                                                         | de Souza, , RF, de Freitas Oliveira Paranhos, H, Lovato da Silva, CH, Abu-Naba'a, L, Fedorowicz, Z; Gurgan, CA                                      | 2009 |
| Interferon-alpha for maintenance of follicular lymphoma                                                                                                                               | Baldo, , P, Rupolo, M, Compagnoni, A, Lazzarini, R, Bearz, A, Cannizzaro, R, Spazzapan, S, Truccolo, I; Moja, L                                     | 2010 |
| Interventions for preventing recurrent urinary tract infection during pregnancy                                                                                                       | Schneeberger, , C, Geerlings, SE, Middleton, P; Crowther, CA                                                                                        | 2015 |

|                                                                                                                                    |                                                                                                                                                   |      |
|------------------------------------------------------------------------------------------------------------------------------------|---------------------------------------------------------------------------------------------------------------------------------------------------|------|
| Interventions for improving palliative care for older people living in nursing care homes                                          | Hall, , S, Kolliakou, A, Petkova, H, Froggatt, K; Higginson, IJ                                                                                   | 2011 |
| Internal dressings for healing perianal abscess cavities                                                                           | Smith, , SR, Newton, K, Smith, JA, Dumville, JC, Iheozor-Ejiofor, Z, Pearce, LE, Barrow, PJ, Hancock, L; Hill, J                                  | 2016 |
| Intermittent versus daily inhaled corticosteroids for persistent asthma in children and adults                                     | Chauhan, , BF, Chartrand, C; Ducharme, FM                                                                                                         | 2013 |
| Interventions during pregnancy to prevent preterm birth: an overview of Cochrane systematic reviews                                | Medley, , N, Vogel, JP, Care, A; Alfirevic, Z                                                                                                     | 2018 |
| Interventions for promoting booster seat use in four to eight year olds travelling in motor vehicles                               | Ehiri, , JE, Ejere, HOD, Magnussen, L, Emusu, D, King, W; Osberg, SJ                                                                              | 2006 |
| Interferon for interferon nonresponding and relapsing patients with chronic hepatitis C                                            | Koretz, , RL, Pleguezuelo, M, Arvaniti, V, Barrera Baena, P, Ciria, R, Gurusamy, KS, Davidson, BR; Burroughs, AK                                  | 2013 |
| Interventions for chronic kidney disease in people with sickle cell disease                                                        | Roy, , NBA, Fortin, PM, Bull, KR, Doree, C, Trivella, M, Hopewell, S; Estcourt, LJ                                                                | 2017 |
| Interventions for erythema nodosum leprosum                                                                                        | Van Veen, , NHJ, Lockwood, DNJ, van Brakel, WH, Ramirez Jr, J; Richardus, JH                                                                      | 2009 |
| Interconception care for women with a history of gestational diabetes for improving maternal and infant outcomes                   | Tieu, , J, Shepherd, E, Middleton, P; Crowther, CA                                                                                                | 2017 |
| Interventions for drooling in children with cerebral palsy                                                                         | Walshe, , M, Smith, M; Pennington, L                                                                                                              | 2012 |
| Interventions for prevention of herpes simplex labialis (cold sores on the lips)                                                   | Chi, , CC, Wang, SH, Delamere, FM, Wojnarowska, F, Peters, MC; Kanjirath, PP                                                                      | 2015 |
| Interventions for hyperthyroidism pre-pregnancy and during pregnancy                                                               | Earl, , R, Crowther, CA; Middleton, P                                                                                                             | 2013 |
| Interventions for preventing oral mucositis for patients with cancer receiving treatment                                           | Worthington, , HV, Clarkson, JE, Bryan, G, Furness, S, Glenny, AM, Littlewood, A, McCabe, MG, Meyer, S; Khalid, T                                 | 2011 |
| Interventions for HIV-associated nephropathy                                                                                       | Yahaya, , I, Uthman, OA; Uthman, MMB                                                                                                              | 2013 |
| Interventions for improving community ambulation in individuals with stroke                                                        | Barclay, , RE, Stevenson, TJ, Poluha, W, Ripat, J, Nett, C; Srikesavan, CS                                                                        | 2015 |
| Interventions for improving communication with children and adolescents about their cancer                                         | Ranmal, , R, Prictor, M; Scott, JT                                                                                                                | 2008 |
| Interventions for motor apraxia following stroke                                                                                   | West, , C, Bowen, A, Hesketh, A; Vail, A                                                                                                          | 2008 |
| Internet-based cognitive and behavioural therapies for post-traumatic stress disorder (PTSD) in adults                             | Lewis, , C, Roberts, NP, Bethell, A, Robertson, L; Bisson, JI                                                                                     | 2018 |
| Interventions aimed at communities to inform and/or educate about early childhood vaccination                                      | Saeterdal, , I, Lewin, S, Austvoll-Dahlgren, A, Glenton, C; Munabi-Babigumira, S                                                                  | 2014 |
| Interventions for morphea                                                                                                          | Albuquerque, , JVD, Andriolo, BNG, Vasconcellos, MRA, Civile, VT, Lyddiatt, A; Trevisani, VFM                                                     | 2019 |
| Interventions for preventing intensive care unit delirium in adults                                                                | Herling, , SF, Greve, IE, Vasilevskis, EE, Egerod, I, Bekker Mortensen, C, Møller, AM, Svenningsen, H; Thomsen, T                                 | 2018 |
| Interventions for non-oliguric hyperkalaemia in preterm neonates                                                                   | Vemgal, , P; Ohlsson, A                                                                                                                           | 2012 |
| Interventions for preventing venous thromboembolism in adults undergoing knee arthroscopy                                          | Ramos, , J, Perrotta, C, Badarotti, G; Berenstein, G                                                                                              | 2008 |
| Interventions for mucous membrane pemphigoid and epidermolysis bullosa acquisita                                                   | Kirtschig, , G, Murrell, DF, Wojnarowska, F; Khumalo, NP                                                                                          | 2003 |
| Interventions for protecting renal function in the perioperative period                                                            | Zacharias, , M, Mugawar, M, Herbison, GP, Walker, RJ, Hovhannisyan, K, Sivalingam, P; Conlon, NP                                                  | 2013 |
| Interventions for haemolytic uraemic syndrome and thrombotic thrombocytopenic purpura                                              | Michael, , M, Elliott, EJ, Ridley, GF, Hodson, EM; Craig, JC                                                                                      | 2009 |
| Interventions for patients and caregivers to improve knowledge of sickle cell disease and recognition of its related complications | Asnani, , MR, Quimby, KR, Bennett, NR; Francis, DK                                                                                                | 2016 |
| Interventions for preventing blood loss during the treatment of cervical intraepithelial neoplasia                                 | Martin-Hirsch, , PPL; Bryant, A                                                                                                                   | 2013 |
| Interventions for promoting the initiation of breastfeeding                                                                        | Balogun, , OO, O'Sullivan, EJ, McFadden, A, Ota, E, Gavine, A, Garner, CD, Renfrew, MJ; MacGillivray, S                                           | 2016 |
| Interventions for preventing venous thromboembolism following abdominal aortic surgery                                             | Bani-Hani, , M, Titi, MA, Jaradat, I; Al-Khaffaf, H                                                                                               | 2008 |
| Interventions for preventing late postnatal mother-to-child transmission of HIV                                                    | Horvath, , T, Madi, BC, Iuppa, IM, Kennedy, GE, Rutherford, GW; Read, JS                                                                          | 2009 |
| Interventions for preventing distal intestinal obstruction syndrome (DIOS) in cystic fibrosis                                      | Green, , J, Gilchrist, FJ; Carroll, W                                                                                                             | 2018 |
| Interventions for increasing the use of shared decision making by healthcare professionals                                         | Légaré, , F, Adekpedjou, R, Stacey, D, Turcotte, S, Kryworuchko, J, Graham, ID, Lyddiatt, A, Politi, MC, Thomson, R, Elwyn, G; Donner-Banzhoff, N | 2018 |
| Integrated management of childhood illness (IMCI) strategy for children under five                                                 | Gera, , T, Shah, D, Garner, P, Richardson, M; Sachdev, HS                                                                                         | 2016 |
| Interferon beta for secondary progressive multiple sclerosis                                                                       | La Mantia, , L, Vacchi, L, Di Pietrantonj, C, Ebers, G, Rovaris, M, Fredrikson, S; Filippini, G                                                   | 2012 |
| Interventions for improving modifiable risk factor control in the secondary prevention of stroke                                   | Bridgwood, , B, Lager, KE, Mistri, AK, Khunti, K, Wilson, AD; Modi, P                                                                             | 2018 |
| Interleukin-2 as maintenance therapy for children and adults with acute myeloid leukaemia in first complete remission              | Mao, , C, Fu, XH, Yuan, JQ, Yang, ZY, Huang, YF, YE, QL, Wu, XY, Hu, XF, Zhai, ZM; Tang, JL                                                       | 2015 |
| Interventions for chronic non-hypovolaemic hypotonic hyponatraemia                                                                 | Nagler, , EV, Haller, MC, Van Biesen, W, Vanholder, R, Craig, JC; Webster, AC                                                                     | 2018 |

|                                                                                                                                                                                               |                                                                                                                                                                        |      |
|-----------------------------------------------------------------------------------------------------------------------------------------------------------------------------------------------|------------------------------------------------------------------------------------------------------------------------------------------------------------------------|------|
| Interferon after surgery for women with advanced (Stage II-IV) epithelial ovarian cancer                                                                                                      | Lawal, , AO, Musekiwa, A; Grobler, L                                                                                                                                   | 2013 |
| Interventions for preventing high altitude illness: Part 3. Miscellaneous and non-pharmacological interventions                                                                               | Molano Franco, , D, Nieto Estrada, VH, Gonzalez Garay, AG, Martí-Carvajal, AJ; Arevalo-Rodriguez, I                                                                    | 2019 |
| Interventions for preventing falls in people after stroke                                                                                                                                     | Verheyden, , GSAF, Weerdesteijn, V, Pickering, RM, Kunkel, D, Lennon, S, Geurts, ACH; Ashburn, A                                                                       | 2013 |
| Interventionist versus expectant care for severe pre-eclampsia between 24 and 34 weeks' gestation                                                                                             | Churchill, , D, Duley, L, Thornton, JG, Moussa, M, Ali, HSM; Walker, KF                                                                                                | 2018 |
| Interventions for increasing fruit and vegetable consumption in children aged five years and under                                                                                            | Hodder, , RK, O'Brien, KM, Stacey, FG, Wyse, RJ, Clinton-McHarg, T, Tzelepis, F, James, EL, Bartlem, KM, Nathan, NK, Sutherland, R, Robson, E, Yoong, SL; Wolfenden, L | 2018 |
| Interventions for improving sleep quality in people with chronic kidney disease                                                                                                               | Natale, , P, Ruospo, M, Saglimbene, VM, Palmer, SC; Strippoli, GFM                                                                                                     | 2019 |
| Interventions for preventing obesity in children                                                                                                                                              | Brown, , T, Moore, THM, Hooper, L, Gao, Y, Zayegh, A, Ijaz, S, Elwenspoek, M, Foxen, SC, Magee, L, O'Malley, C, Waters, E; Summerbell, CD                              | 2019 |
| Integration of HIV/AIDS services with maternal, neonatal and child health, nutrition, and family planning services                                                                            | Lindgren, , ML, Kennedy, CE, Bain-Brickley, D, Azman, H, Creanga, AA, Butler, LM, Spaulding, AB, Horvath, T; Kennedy, GE                                               | 2012 |
| Interventions for preventing falls in older people in care facilities and hospitals                                                                                                           | Cameron, , ID, Dyer, SM, Panagoda, CE, Murray, GR, Hill, KD, Cumming, RG; Kerse, N                                                                                     | 2018 |
| Interventions for necrotizing soft tissue infections in adults                                                                                                                                | Hua, , C, Bosc, R, Sbidian, E, De Prost, N, Hughes, C, Jabre, P, Chosidow, O; Le Cleach, L                                                                             | 2018 |
| Interventions for preventing upper gastrointestinal bleeding in people admitted to intensive care units                                                                                       | Toews, , I, George, AT, Peter, JV, Kirubakaran, R, Fontes, LES, Ezekiel, JPB; Meerpohl, JJ                                                                             | 2018 |
| Interventions for improving adherence to iron chelation therapy in people with sickle cell disease or thalassaemia                                                                            | Fortin, , PM, Fisher, SA, Madgwick, KV, Trivella, M, Hopewell, S, Doree, C; Estcourt, LJ                                                                               | 2018 |
| Intermittent iron supplementation for reducing anaemia and its associated impairments in adolescent and adult menstruating women                                                              | Fernández-Gaxiola, , AC; De-Regil, LM                                                                                                                                  | 2019 |
| Momordica charantia for type 2 diabetes mellitus                                                                                                                                              | Ooi, , CP, Yassin, Z; Hamid, TA                                                                                                                                        | 2012 |
| Maintenance therapy with oxytocin antagonists for inhibiting preterm birth after threatened preterm labour                                                                                    | Papatsonis, , DNM, Flenady, V; Liley, HG                                                                                                                               | 2013 |
| Multidisciplinary rehabilitation for adults with multiple sclerosis                                                                                                                           | Khan, , F, Turner-Stokes, L, Ng, L, Kilpatrick, T; Amatya, B                                                                                                           | 2007 |
| Music interventions for preoperative anxiety                                                                                                                                                  | Bradt, , J, Dileo, C; Shim, M                                                                                                                                          | 2013 |
| Methotrexate for primary biliary cirrhosis                                                                                                                                                    | Giljaca, , V, Poropat, G, Stimac, D; Gluud, C                                                                                                                          | 2010 |
| MVA85A vaccine to enhance BCG for preventing tuberculosis                                                                                                                                     | Kashangura, , R, Jullien, S, Garner, P; Johnson, S                                                                                                                     | 2019 |
| Music therapy for people with autism spectrum disorder                                                                                                                                        | Geretsegger, , M, Elefant, C, Mössler, KA; Gold, C                                                                                                                     | 2014 |
| Management of reported decreased fetal movements for improving pregnancy outcomes                                                                                                             | Hofmeyr, , GJ; Novikova, N                                                                                                                                             | 2012 |
| Mirtazapine adjunct for people with schizophrenia                                                                                                                                             | Perry, , LA, Ramson, D; Stricklin, S                                                                                                                                   | 2018 |
| Multinutrient fortification of human breast milk for preterm infants following hospital discharge                                                                                             | Young, , L, Embleton, ND, McCormick, FM; McGuire, W                                                                                                                    | 2013 |
| Mass media interventions for preventing smoking in young people                                                                                                                               | Carson-Chahhoud, , KV, Ameer, F, Sayehmiri, K, Hnin, K, van Agteren, JEM, Sayehmiri, F, Brinn, MP, Esterman, AJ, Chang, AB; Smith, BJ                                  | 2017 |
| Methadone maintenance at different dosages for opioid dependence                                                                                                                              | Faggiano, , F, Vigna-Taglianti, F, Versino, E; Lemma, P                                                                                                                | 2003 |
| Mesenchymal stromal cells as treatment or prophylaxis for acute or chronic graft-versus-host disease in haematopoietic stem cell transplant (HSCT) recipients with a haematological condition | Fisher, , SA, Cutler, A, Doree, C, Brunskill, SJ, Stanworth, SJ, Navarrete, C; Girdlestone, J                                                                          | 2019 |
| Methylxanthines for prolonged non-specific cough in children                                                                                                                                  | Chang, , AB, Halstead, RAP; Petsky, HL                                                                                                                                 | 2005 |
| Mobile phone text messaging to improve medication adherence in secondary prevention of cardiovascular disease                                                                                 | Adler, , AJ, Martin, N, Mariani, J, Tajer, CD, Owolabi, OO, Free, C, Serrano, NC, Casas, JP; Perel, P                                                                  | 2017 |
| Mosquito repellents for malaria prevention                                                                                                                                                    | Maia, , MF, Kliner, M, Richardson, M, Lengeler, C; Moore, SJ                                                                                                           | 2018 |
| Monoamine oxidase B inhibitors for early Parkinson's disease                                                                                                                                  | Turnbull, , K, Caslake, R, Macleod, A, Ives, N, Stowe, R; Counsell, C                                                                                                  | 2005 |
| Media-delivered cognitive behavioural therapy and behavioural therapy (self-help) for anxiety disorders in adults                                                                             | Mayo-Wilson, , E; Montgomery, P                                                                                                                                        | 2013 |
| Methods of milk expression for lactating women                                                                                                                                                | Becker, , GE, Smith, HA; Cooney, F                                                                                                                                     | 2016 |
| Methotrexate for maintenance of remission in Crohn's disease                                                                                                                                  | Patel, , V, Wang, Y, MacDonald, JK, McDonald, JWD; Chande, N                                                                                                           | 2014 |
| Medical day hospital care for older people versus alternative forms of care                                                                                                                   | Brown, , L, Forster, A, Young, J, Crocker, T, Benham, A; Langhorne, P                                                                                                  | 2015 |
| Medically assisted nutrition for adult palliative care patients                                                                                                                               | Good, , P, Richard, R, Syrmis, W, Jenkins-Marsh, S; Stephens, J                                                                                                        | 2014 |
| Management of toxoplasmic encephalitis in HIV-infected adults (with an emphasis on resource-poor settings)                                                                                    | Dedicoat, , M; Livesley, N                                                                                                                                             | 2006 |
| Milrinone for persistent pulmonary hypertension of the newborn                                                                                                                                | Bassler, , D, Kreutzer, K, McNamara, P; Kirpalani, H                                                                                                                   | 2010 |
| Multidisciplinary biopsychosocial rehabilitation for subacute low back pain                                                                                                                   | Marin, , TJ, Van Eerd, D, Irvin, E, Couban, R, Koes, BW, Malmivaara, A, van Tulder, MW; Kamper, SJ                                                                     | 2017 |

|                                                                                                                                                              |                                                                                                                                                                         |      |
|--------------------------------------------------------------------------------------------------------------------------------------------------------------|-------------------------------------------------------------------------------------------------------------------------------------------------------------------------|------|
| Mechanical ventilation for newborn infants with respiratory failure due to pulmonary disease                                                                 | Henderson-Smart, , DJ, Wilkinson, AR; Raynes-Greenow, CH                                                                                                                | 2002 |
| Medical interventions for high-grade vulval intraepithelial neoplasia                                                                                        | Pepas, , L, Kaushik, S, Nordin, A, Bryant, A; Lawrie, TA                                                                                                                | 2015 |
| Maintenance immunosuppression for adults undergoing liver transplantation: a network meta-analysis                                                           | Rodríguez-Perálvarez, , M, Guerrero-Misas, M, Thorburn, D, Davidson, BR, Tsochatzis, E; Gurusamy, KS                                                                    | 2017 |
| Mesalamine (5-ASA) for the prevention of recurrent diverticulitis                                                                                            | Carter, , F, Alsayb, M, Marshall, JK; Yuan, Y                                                                                                                           | 2017 |
| Medical treatment for botulism                                                                                                                               | Chalk, , CH, Benstead, TJ, Pound, JD; Keezer, MR                                                                                                                        | 2019 |
| Magnesium sulphate versus phenytoin for eclampsia                                                                                                            | Duley, , L, Henderson-Smart, DJ; Chou, D                                                                                                                                | 2010 |
| Mini-Cog for the diagnosis of Alzheimer's disease dementia and other dementias within a primary care setting                                                 | Seitz, , DP, Chan, CCH, Newton, HT, Gill, SS, Herrmann, N, Smailagic, N, Nikolaou, V; Fage, BA                                                                          | 2018 |
| Metformin treatment before and during IVF or ICSI in women with polycystic ovary syndrome                                                                    | Tso, , LO, Costello, MF, Albuquerque, LET, Andriolo, RB; Macedo, CR                                                                                                     | 2014 |
| Mesh versus non-mesh for inguinal and femoral hernia repair                                                                                                  | Lockhart, , K, Dunn, D, Teo, S, Ng, JY, Dhillon, M, Teo, E; van Driel, ML                                                                                               | 2018 |
| Methylxanthine treatment for apnoea in preterm infants                                                                                                       | Henderson-Smart, , DJ; De Paoli, AG                                                                                                                                     | 2010 |
| Maternal oxygen administration for suspected impaired fetal growth                                                                                           | Say, , L, Gülmezoglu, AM; Hofmeyr, GJ                                                                                                                                   | 2003 |
| Mass media interventions for smoking cessation in adults                                                                                                     | Bala, , MM, Strzeszynski, L; Topor-Madry, R                                                                                                                             | 2017 |
| Medical interventions for the prevention of platinum-induced hearing loss in children with cancer                                                            | van As, , JW, van den Berg, H; van Dalen, EC                                                                                                                            | 2019 |
| Methotrexate for maintenance of remission in ulcerative colitis                                                                                              | Wang, , Y, MacDonald, JK, Vandermeer, B, Griffiths, AM; El-Matary, W                                                                                                    | 2015 |
| Maternal dietary antigen avoidance during pregnancy or lactation, or both, for preventing or treating atopic disease in the child                            | Kramer, , MS; Kakuma, R                                                                                                                                                 | 2012 |
| Methotrexate for psoriatic arthritis                                                                                                                         | Wilsdon, , TD, Whittle, SL, Thynne, TRJ; Mangoni, AA                                                                                                                    | 2019 |
| Multidisciplinary rehabilitation for fibromyalgia and musculoskeletal pain in working age adults                                                             | Karjalainen, , KA, Malmivaara, A, van Tulder, MW, Roine, R, Jauhiainen, M, Hurri, H; Koes, BW                                                                           | 1999 |
| Multiple risk factor interventions for primary prevention of coronary heart disease                                                                          | Ebrahim, , S, Taylor, F, Ward, K, Beswick, A, Burke, M; Davey Smith, G                                                                                                  | 2011 |
| Melatonin for women in pregnancy for neuroprotection of the fetus                                                                                            | Wilkinson, , D, Shepherd, E; Wallace, EM                                                                                                                                | 2016 |
| Malaria chemoprophylaxis in sickle cell disease                                                                                                              | Oniyangi, , O; Omari, AAA                                                                                                                                               | 2006 |
| Maternal nutrient supplementation for suspected impaired fetal growth                                                                                        | Say, , L, Gülmezoglu, AM; Hofmeyr, GJ                                                                                                                                   | 2003 |
| Maternal and foetal outcomes following natural vaginal versus caesarean section (c-section) delivery in women with bleeding disorders and carriers           | Karanth, , L, Kanagasabai, S; Abas, ABL                                                                                                                                 | 2017 |
| Morphine for chronic neuropathic pain in adults                                                                                                              | Cooper, , TE, Chen, J, Wiffen, PJ, Derry, S, Carr, DB, Aldington, D, Cole, P; Moore, RA                                                                                 | 2017 |
| Mass media interventions for reducing mental health-related stigma                                                                                           | Clement, , S, Lassman, F, Barley, E, Evans-Lacko, S, Williams, P, Yamaguchi, S, Slade, M, Rüsch, N; Thornicroft, G                                                      | 2013 |
| Mupirocin ointment for preventing Staphylococcus aureus infections in nasal carriers                                                                         | van Rijen, , M, Bonten, M, Wenzel, R; Kluytmans, J                                                                                                                      | 2008 |
| Medical versus surgical interventions for open angle glaucoma                                                                                                | Burr, , J, Azuara-Blanco, A, Avenell, A; Tuulonen, A                                                                                                                    | 2012 |
| Mycophenolate mofetil versus methotrexate for prevention of graft-versus-host disease in people receiving allogeneic hematopoietic stem cell transplantation | Kharfan-Dabaja, , M, Mhaskar, R, Reljic, T, Pidala, J, Perkins, JB, Djulbegovic, B; Kumar, A                                                                            | 2014 |
| Methods of preventing bacterial sepsis and wound complications after liver transplantation                                                                   | Gurusamy, , KS, Nagendran, M; Davidson, BR                                                                                                                              | 2014 |
| Mosquito larval source management for controlling malaria                                                                                                    | Tusting, , LS, Thwing, J, Sinclair, D, Fillinger, U, Gimnig, J, Bonner, KE, Bottomley, C; Lindsay, SW                                                                   | 2013 |
| Mirror therapy for improving motor function after stroke                                                                                                     | Thieme, , H, Morkisch, N, Mehrholz, J, Pohl, M, Behrens, J, Borgetto, B; Dohle, C                                                                                       | 2018 |
| Moderately early (7-14 days) postnatal corticosteroids for preventing chronic lung disease in preterm infants                                                | Halliday, , HL, Ehrenkranz, RA; Doyle, LW                                                                                                                               | 2003 |
| Management of sexual dysfunction due to antipsychotic drug therapy                                                                                           | Schmidt, , HM, Hagen, M, Kriston, L, Soares-Weiser, K, Maayan, N; Berner, MM                                                                                            | 2012 |
| Muscle relaxants for pain management in rheumatoid arthritis                                                                                                 | Richards, , BL, Whittle, SL; Buchbinder, R                                                                                                                              | 2012 |
| Motivational interviewing for improving recovery after stroke                                                                                                | Cheng, , D, Qu, Z, Huang, J, Xiao, Y, Luo, H; Wang, J                                                                                                                   | 2015 |
| Mechanical bowel preparation for elective colorectal surgery                                                                                                 | Güenaga, , KF, Matos, D; Wille-Jørgensen, P                                                                                                                             | 2011 |
| Mannitol for acute stroke                                                                                                                                    | Bereczki, , D, Liu, M, Fernandes do Prado, G; Fekete, I                                                                                                                 | 2007 |
| Massage therapy for people with HIV/AIDS                                                                                                                     | Hillier, , SL, Louw, Q, Morris, L, Uwimana, J; Statham, S                                                                                                               | 2010 |
| Melatonin and agomelatine for preventing seasonal affective disorder                                                                                         | Nussbaumer-Streit, , B, Greenblatt, A, Kaminski-Hartenthaler, A, Van Noord, MG, Forneris, CA, Morgan, LC, Gaynes, BN, Wipplinger, J, Lux, LJ, Winkler, D; Gartlehner, G | 2019 |
| Methylphenidate for children and adolescents with autism spectrum disorder                                                                                   | Sturman, , N, Deckx, L; van Driel, ML                                                                                                                                   | 2017 |

|                                                                                                                                                              |                                                                                                            |      |
|--------------------------------------------------------------------------------------------------------------------------------------------------------------|------------------------------------------------------------------------------------------------------------|------|
| Melatonin for the treatment of dementia                                                                                                                      | Jansen, , SL, Forbes, D, Duncan, V, Morgan, DG; Malouf, R                                                  | 2006 |
| Mucolytic agents versus placebo for chronic bronchitis or chronic obstructive pulmonary disease                                                              | Poole, , P, Sathananthan, K; Fortescue, R                                                                  | 2019 |
| Microwave thermotherapy for benign prostatic hyperplasia                                                                                                     | Hoffman, , RM, Monga, M, Elliott, SP, MacDonald, R, Langsjoen, J, Tacklind, J; Wilt, TJ                    | 2012 |
| Methotrexate for ankylosing spondylitis                                                                                                                      | Chen, , J, Veras, MMS, Liu, C; Lin, J                                                                      | 2013 |
| Methods of vascular occlusion for elective liver resections                                                                                                  | Gurusamy, , KS, Sheth, H, Kumar, Y, Sharma, D; Davidson, BR                                                | 2009 |
| Mitoxantrone for multiple sclerosis                                                                                                                          | Martinelli Boneschi, , F, Vacchi, L, Rovaris, M, Capra, R; Comi, G                                         | 2013 |
| Moderate-term, low-dose corticosteroids for rheumatoid arthritis                                                                                             | Criswell, , L, Saag, K, Sems, KM, Welch, V, Shea, B, Wells, GA; Suarez-Almazor, ME                         | 1998 |
| Mobile phone-based interventions for improving adherence to medication prescribed for the primary prevention of cardiovascular disease in adults             | Palmer, , MJ, Barnard, S, Perel, P; Free, C                                                                | 2018 |
| Mechanical traction for neck pain with or without radiculopathy                                                                                              | Graham, , N, Gross, A, Goldsmith, CH, Klaber Moffett, J, Haines, T, Burnie, SJ; Peloso, PMJ                | 2008 |
| Motivational interviewing for the prevention of alcohol misuse in young adults                                                                               | Foxcroft, , DR, Coombes, L, Wood, S, Allen, D, Almeida Santimano, NML; Moreira, MT                         | 2016 |
| Management strategies for pancreatic pseudocysts                                                                                                             | Gurusamy, , KS, Pallari, E, Hawkins, N, Pereira, SP; Davidson, BR                                          | 2016 |
| Misoprostol for induction of labour to terminate pregnancy in the second or third trimester for women with a fetal anomaly or after intrauterine fetal death | Dodd, , JM; Crowther, CA                                                                                   | 2010 |
| Management of faecal incontinence and constipation in adults with central neurological diseases                                                              | Coggrave, , M, Norton, C; Cody, JD                                                                         | 2014 |
| Mohs micrographic surgery versus surgical excision for periocular basal cell carcinoma                                                                       | Narayanan, , K, Hadid, OH; Barnes, EA                                                                      | 2014 |
| Micronutrient supplementation for children with HIV infection                                                                                                | Irlam, , JH, Siegfried, N, Visser, ME; Rollins, NC                                                         | 2013 |
| Metal protein attenuating compounds for the treatment of Alzheimer's dementia                                                                                | Sampson, , EL, Jenagaratnam, L; McShane, R                                                                 | 2014 |
| Medical and dietary interventions for preventing recurrent urinary stones in children                                                                        | Kern, , A, Grimsby, G, Mayo, H; Baker, LA                                                                  | 2017 |
| Methotrexate for multiple sclerosis                                                                                                                          | Gray, , O, McDonnell, GV; Forbes, RB                                                                       | 2004 |
| Mifepristone for uterine fibroids                                                                                                                            | Tristan, , M, Orozco, LJ, Steed, A, Ramirez-Morera, A; Stone, P                                            | 2012 |
| Monoaminergic agonists for acute traumatic brain injury                                                                                                      | Forsyth, , RJ, Jayamani, B, Paine, TC; Mascarenhas, S                                                      | 2006 |
| Multidisciplinary care for adults with amyotrophic lateral sclerosis or motor neuron disease                                                                 | Ng, , L; Khan, F                                                                                           | 2009 |
| Magnetic resonance imaging versus computed tomography for detection of acute vascular lesions in patients presenting with stroke symptoms                    | Brazzelli, , M, Sandercock, PAG, Chappell, FM, Celani, MG, Righetti, E, Arestis, N, Wardlaw, JM; Deeks, JJ | 2009 |
| Microwave therapy for cervical ectropion                                                                                                                     | Liu, , Y, Yang, K, Wu, T, Roberts, H, Li, J, Tian, J, Ma, B, Tan, J; Zhang, P                              | 2007 |
| Male circumcision for prevention of heterosexual acquisition of HIV in men                                                                                   | Siegfried, , N, Muller, M, Deeks, JJ; Volmink, J                                                           | 2009 |
| Melatonin as add-on treatment for epilepsy                                                                                                                   | Brigo, , F, Igwe, SC; Del Felice, A                                                                        | 2016 |
| Mono and multifaceted inhalant and/or food allergen reduction interventions for preventing asthma in children at high risk of developing asthma              | Maas, , T, Kaper, J, Sheikh, A, Knottnerus, JA, Wesseling, G, Dompeling, E, Muris, JWM; van Schayck, CP    | 2009 |
| Methotrexate for high-grade osteosarcoma in children and young adults                                                                                        | van Dalen, , EC, van As, JW; de Camargo, B                                                                 | 2011 |
| Metformin for endometrial hyperplasia                                                                                                                        | Clement, , NS, Oliver, TRW, Shiwani, H, Sanner, JRF, Mulvaney, CA; Atiomo, W                               | 2017 |
| Management of drainage for malignant ascites in gynaecological cancer                                                                                        | Keen, , A, Fitzgerald, D, Bryant, A; Dickinson, HO                                                         | 2010 |
| Methods to decrease blood loss and transfusion requirements for liver transplantation                                                                        | Gurusamy, , KS, Pissanou, T, Pikhart, H, Vaughan, J, Burroughs, AK; Davidson, BR                           | 2011 |
| Metered dose inhalers versus nebulizers for aerosol bronchodilator delivery for adult patients receiving mechanical ventilation in critical care units       | Holland, , A, Smith, F, Penny, K, McCrossan, G, Veitch, L; Nicholson, C                                    | 2013 |
| Music for insomnia in adults                                                                                                                                 | Jespersen, , KV, Koenig, J, Jennum, P; Vuust, P                                                            | 2015 |
| Methadone for neuropathic pain in adults                                                                                                                     | McNicol, , ED, Ferguson, MC; Schumann, R                                                                   | 2017 |
| Mefloquine for preventing malaria during travel to endemic areas                                                                                             | Tickell-Painter, , M, Maayan, N, Saunders, R, Pace, C; Sinclair, D                                         | 2017 |
| Massage for promoting mental and physical health in typically developing infants under the age of six months                                                 | Bennett, , C, Underdown, A; Barlow, J                                                                      | 2013 |
| Monoclonal antibody for reducing the risk of respiratory syncytial virus infection in children                                                               | Andabaka, , T, Nickerson, JW, Rojas-Reyes, MX, Rueda, JD, Bacic Vrca, V; Barsic, B                         | 2013 |
| Midazolam for sedation before procedures                                                                                                                     | Conway, , A, Rolley, J; Sutherland, JR                                                                     | 2016 |
| Medical treatments for incomplete miscarriage                                                                                                                | Kim, , C, Barnard, S, Neilson, JP, Hickey, M, Vazquez, JC; Dou, L                                          | 2017 |

|                                                                                                                                                    |                                                                                                             |      |
|----------------------------------------------------------------------------------------------------------------------------------------------------|-------------------------------------------------------------------------------------------------------------|------|
| Micronutrient supplementation in pregnant women with HIV infection                                                                                 | Siegfried, , N, Irlam, JH, Visser, ME; Rollins, NN                                                          | 2012 |
| Medical and surgical treatment for ocular myasthenia                                                                                               | Benatar, , M; Kaminski, H                                                                                   | 2012 |
| Motivational interviewing for substance abuse                                                                                                      | Smedslund, , G, Berg, RC, Hammerstrøm, KT, Steiro, A, Leiknes, KA, Dahl, HM; Karlsen, K                     | 2011 |
| Methods for securing endotracheal tubes in newborn infants                                                                                         | Lai, , M, Inglis, GDT, Hose, K, Jardine, LA; Davies, MW                                                     | 2014 |
| Medications for increasing milk supply in mothers expressing breastmilk for their preterm hospitalised infants                                     | Donovan, , TJ; Buchanan, K                                                                                  | 2012 |
| Magnetic resonance perfusion for differentiating low-grade from high-grade gliomas at first presentation                                           | Abrigo, , JM, Fountain, DM, Provenzale, JM, Law, EK, Kwong, JSW, Hart, MG; Tam, WWS                         | 2018 |
| Mobile phone text messaging for promoting adherence to antiretroviral therapy in patients with HIV infection                                       | Horvath, , T, Azman, H, Kennedy, GE; Rutherford, GW                                                         | 2012 |
| Medically assisted hydration for adult palliative care patients                                                                                    | Good, , P, Richard, R, Syrmis, W, Jenkins-Marsh, S; Stephens, J                                             | 2014 |
| Medical and surgical interventions for the treatment of urinary stones in children                                                                 | Barreto, , L, Jung, JH, Abdelrahim, A, Ahmed, M, Dawkins, GPC; Kazmierski, M                                | 2018 |
| Mindfulness-based stress reduction for family carers of people with dementia                                                                       | Liu, , Z, Sun, YY; Zhong, BL                                                                                | 2018 |
| Medical methods for mid-trimester termination of pregnancy                                                                                         | Wildschut, , H, Both, MI, Medema, S, Thomee, E, Wildhagen, MF; Kapp, N                                      | 2011 |
| Mammography in combination with breast ultrasonography versus mammography for breast cancer screening in women at average risk                     | Gartlehner, , G, Thaler, K, Chapman, A, Kaminski-Hartenthaler, A, Berzaczy, D, Van Noord, MG; Helbich, TH   | 2013 |
| Methods of term labour induction for women with a previous caesarean section                                                                       | West, , HM, Jozwiak, M; Dodd, JM                                                                            | 2017 |
| Male circumcision for prevention of homosexual acquisition of HIV in men                                                                           | Wysong, , CS, Kongnyuy, EJ, Shey, M, Muula, AS, Navti, OB, Akl, EA; Lo, YR                                  | 2011 |
| Microwave coagulation for liver metastases                                                                                                         | Bala, , MM, Riemsma, RP, Wolff, R; Kleijnen, J                                                              | 2013 |
| Mycobacterium vaccae immunotherapy for treating tuberculosis                                                                                       | de Bruyn, , G; Garner, P                                                                                    | 2003 |
| Minimally invasive surgery versus radiotherapy/chemoradiotherapy for small-volume primary oropharyngeal carcinoma                                  | Howard, , J, Masterson, L, Dwivedi, RC, Riffat, F, Benson, R, Jefferies, S, Jani, P, Tysome, JR; Nutting, C | 2016 |
| Mindfulness-based stress reduction for women diagnosed with breast cancer                                                                          | Schell, , LK, Monsef, I, Wöckel, A; Skoetz, N                                                               | 2019 |
| Medical treatment for early fetal death (less than 24 weeks)                                                                                       | Lemmers, , M, Verschoor, MAC, Kim, BV, Hickey, M, Vazquez, JC, Mol, BWJ; Neilson, JP                        | 2019 |
| Monosodium glutamate avoidance for chronic asthma in adults and children                                                                           | Zhou, , Y, Yang, M; Dong, BR                                                                                | 2012 |
| Modifying the consistency of food and fluids for swallowing difficulties in dementia                                                               | Flynn, , E, Smith, CH, Walsh, CD; Walshe, M                                                                 | 2018 |
| Motivational interviewing for improving outcomes in youth living with HIV                                                                          | Mbuagbaw, , L, Ye, C; Thabane, L                                                                            | 2012 |
| Mobile phone messaging for communicating results of medical investigations                                                                         | Gurol-Urganci, , I, de Jongh, T, Vodopivec-Jamsek, V, Car, J; Atun, R                                       | 2012 |
| Maternal prenatal and/or postnatal n-3 long chain polyunsaturated fatty acids (LCPUFA) supplementation for preventing allergies in early childhood | Gunaratne, , AW, Makrides, M; Collins, CT                                                                   | 2015 |
| Multifactorial and multiple component interventions for preventing falls in older people living in the community                                   | Hopewell, , S, Adedire, O, Copsey, BJ, Boniface, GJ, Sherrington, C, Clemson, L, Close, JCT; Lamb, SE       | 2018 |
| Mobile phone-based interventions for improving contraception use                                                                                   | Smith, , C, Gold, J, Ngo, TD, Sumpter, C; Free, C                                                           | 2015 |
| Multidisciplinary care for Guillain-Barré syndrome                                                                                                 | Khan, , F, Ng, L, Amatya, B, Brand, C; Turner-Stokes, L                                                     | 2010 |
| Monoamine oxidase inhibitors (MAOIs) for fibromyalgia syndrome                                                                                     | Tort, , S, Urrútia, G, Nishishinya, MB; Walitt, B                                                           | 2012 |
| Methadone for chronic non-cancer pain in adults                                                                                                    | Haroutounian, , S, McNicol, ED; Lipman, AG                                                                  | 2012 |
| Massage for low-back pain                                                                                                                          | Furlan, , AD, Giraldo, M, Baskwill, A, Irvin, E; Imamura, M                                                 | 2015 |
| Mefloquine for preventing malaria in non-immune adult travellers                                                                                   | Croft, , AM; Garner, P                                                                                      | 2000 |
| Modification of the home environment for the reduction of injuries                                                                                 | Turner, , S, Arthur, G, Lyons, RA, Weightman, AL, Mann, MK, Jones, SJ, John, A; Lannon, S                   | 2011 |
| Methotrexate as a steroid sparing agent for asthma in adults                                                                                       | Davies, , HRHR, Olson, LLG; Gibson, PG                                                                      | 1998 |
| Massage for promoting growth and development of preterm and/or low birth-weight infants                                                            | Vickers, , A, Ohlsson, A, Lacy, J; Horsley, A                                                               | 2004 |
| Methotrexate for treating juvenile idiopathic arthritis                                                                                            | Takken, , T, van der Net, JJ; Helder, PPJM                                                                  | 2001 |
| Melatonin for pre- and postoperative anxiety in adults                                                                                             | Hansen, , MV, Halladin, NL, Rosenberg, J, Gögenur, I; Möller, AM                                            | 2015 |
| Mediterranean-style diet for the primary and secondary prevention of cardiovascular disease                                                        | Rees, , K, Takeda, A, Martin, N, Ellis, L, Wijesekara, D, Vepa, A, Das, A, Hartley, L; Stranges, S          | 2019 |
| Media campaigns for the prevention of illicit drug use in young people                                                                             | Ferri, , M, Allara, E, Bo, A, Gasparrini, A; Faggiano, F                                                    | 2013 |
| Mannitol and other osmotic diuretics as adjuncts for treating cerebral malaria                                                                     | Okoromah, , CAN, Afolabi, BB; Wall, ECB                                                                     | 2011 |

|                                                                                                                                                                                    |                                                                                                                                                                                                                                                                                           |      |
|------------------------------------------------------------------------------------------------------------------------------------------------------------------------------------|-------------------------------------------------------------------------------------------------------------------------------------------------------------------------------------------------------------------------------------------------------------------------------------------|------|
| Magnetic resonance imaging, magnetic resonance arthrography and ultrasonography for assessing rotator cuff tears in people with shoulder pain for whom surgery is being considered | Lenza, , M, Buchbinder, R, Takwoingi, Y, Johnston, RV, Hanchard, NCA; Faloppa, F                                                                                                                                                                                                          | 2013 |
| Methylphenidate for attention deficit hyperactivity disorder (ADHD) in children and adolescents – assessment of adverse events in non-randomised studies                           | Storebø, , OJ, Pedersen, N, Ramstad, E, Kielsholm, ML, Nielsen, SS, Krogh, HB, Moreira-Maia, CR, Magnusson, FL, Holmskov, M, Gerner, T, Skoog, M, Rosendal, S, Groth, C, Gillies, D, Buch Rasmussen, K, Gauci, D, Zwi, M, Kirubakaran, R, Håkonsen, SJ, Aagaard, L, Simonsen, E; Gluud, C | 2018 |
| Music interventions for acquired brain injury                                                                                                                                      | Magee, , WL, Clark, I, Tamplin, J; Bradt, J                                                                                                                                                                                                                                               | 2017 |
| Modes of exercise training for intermittent claudication                                                                                                                           | Lauret, , GJ, Fakhry, F, Fokkenrood, HJP, Hunink, MGM, Teijink, JAW; Spronk, S                                                                                                                                                                                                            | 2014 |
| Mirtazapine for fibromyalgia in adults                                                                                                                                             | Welsch, , P, Bernardy, K, Derry, S, Moore, RA; Häuser, W                                                                                                                                                                                                                                  | 2018 |
| Massage, reflexology and other manual methods for pain management in labour                                                                                                        | Smith, , CA, Levett, KM, Collins, CT, Dahlen, HG, Ee, CC; Suganuma, M                                                                                                                                                                                                                     | 2018 |
| Multidimensional rehabilitation programmes for adult cancer survivors                                                                                                              | Scott, , DA, Mills, M, Black, A, Cantwell, M, Campbell, A, Cardwell, CR, Porter, S; Donnelly, M                                                                                                                                                                                           | 2013 |
| Metformin added to insulin therapy for type 1 diabetes mellitus in adolescents                                                                                                     | Abdelghaffar, , S; Attia, AM                                                                                                                                                                                                                                                              | 2009 |
| Mobile clinics for women's and children's health                                                                                                                                   | Abdel-Aleem, , H, El-Gibaly, OMH, EL-Gazzar, AFES; Al-Attar, GST                                                                                                                                                                                                                          | 2016 |
| Mini-Mental State Examination (MMSE) for the detection of dementia in clinically unevaluated people aged 65 and over in community and primary care populations                     | Creavin, , ST, Wisniewski, S, Noel-Storr, AH, Trevelyan, CM, Hampton, T, Rayment, D, Thom, VM, Nash, KJE, Elhamoui, H, Milligan, R, Patel, AS, Tsivos, DV, Wing, T, Phillips, E, Kellman, SM, Shackleton, HL, Singleton, GF, Neale, BE, Watton, ME; Cullum, S                             | 2016 |
| Mentoring adolescents to prevent drug and alcohol use                                                                                                                              | Thomas, , RE, Lorenzetti, D; Spragins, W                                                                                                                                                                                                                                                  | 2011 |
| Methotrexate for treating rheumatoid arthritis                                                                                                                                     | Lopez-Olivo, , MA, Siddhanamatha, HR, Shea, B, Tugwell, P, Wells, GA; Suarez-Almazor, ME                                                                                                                                                                                                  | 2014 |
| Multidisciplinary rehabilitation following botulinum toxin and other focal intramuscular treatment for post-stroke spasticity                                                      | Demetrios, , M, Khan, F, Turner-Stokes, L, Brand, C; McSweeney, S                                                                                                                                                                                                                         | 2013 |
| Metformin for women who are overweight or obese during pregnancy for improving maternal and infant outcomes                                                                        | Dodd, , JM, Grivell, RM, Deussen, AR; Hague, WM                                                                                                                                                                                                                                           | 2018 |
| Mechanical insufflation-exsufflation for people with neuromuscular disorders                                                                                                       | Morrow, , B, Zampoli, M, van Aswegen, H; Argent, A                                                                                                                                                                                                                                        | 2013 |
| Maxillary distraction osteogenesis versus orthognathic surgery for cleft lip and palate patients                                                                                   | Kloukos, , D, Fudalej, P, Sequeira-Byron, P; Katsaros, C                                                                                                                                                                                                                                  | 2018 |
| Melatonin for the promotion of sleep in adults in the intensive care unit                                                                                                          | Lewis, , SR, Pritchard, MW, Schofield-Robinson, OJ, Alderson, P; Smith, AF                                                                                                                                                                                                                | 2018 |
| Midwife-led continuity models versus other models of care for childbearing women                                                                                                   | Sandall, , J, Soltani, H, Gates, S, Shennan, A; Devane, D                                                                                                                                                                                                                                 | 2016 |
| Maintenance agonist treatments for opiate-dependent pregnant women                                                                                                                 | Minozzi, , S, Amato, L, Bellisario, C, Ferri, M; Davoli, M                                                                                                                                                                                                                                | 2013 |
| Mass media interventions: effects on health services utilisation                                                                                                                   | Grilli, , R, Ramsay, C; Minozzi, S                                                                                                                                                                                                                                                        | 2002 |
| Motor control exercise for acute non-specific low back pain                                                                                                                        | Macedo, , LG, Saragiotto, BT, Yamato, TP, Costa, LOP, Menezes Costa, LC, Ostelo, RWJG; Maher, CG                                                                                                                                                                                          | 2016 |
| Music therapy for people with schizophrenia and schizophrenia-like disorders                                                                                                       | Geretsegger, , M, Mössler, KA, Bieleninik, Ł, Chen, XJ, Heldal, TO; Gold, C                                                                                                                                                                                                               | 2017 |
| Maintenance treatment with antipsychotic drugs for schizophrenia                                                                                                                   | Leucht, , S, Tardy, M, Komossa, K, Heres, S, Kissling, W; Davis, JM                                                                                                                                                                                                                       | 2012 |
| Mobile phone messaging for preventive health care                                                                                                                                  | Vodopivec-Jamsek, , V, de Jongh, T, Gurol-Urganci, I, Atun, R; Car, J                                                                                                                                                                                                                     | 2012 |
| Maternal probiotic supplementation for prevention of morbidity and mortality in preterm infants                                                                                    | Grev, , J, Berg, M; Soll, R                                                                                                                                                                                                                                                               | 2018 |
| Mobile phone messaging for facilitating self-management of long-term illnesses                                                                                                     | de Jongh, , T, Gurol-Urganci, I, Vodopivec-Jamsek, V, Car, J; Atun, R                                                                                                                                                                                                                     | 2012 |
| Methylphenidate for children and adolescents with attention deficit hyperactivity disorder (ADHD)                                                                                  | Storebø, , OJ, Ramstad, E, Krogh, HB, Nilausen, TD, Skoog, M, Holmskov, M, Rosendal, S, Groth, C, Magnusson, FL, Moreira-Maia, CR, Gillies, D, Buch Rasmussen, K, Gauci, D, Zwi, M, Kirubakaran, R, Forsbøl, B, Simonsen, E; Gluud, C                                                     | 2015 |
| Motor control exercise for chronic non-specific low-back pain                                                                                                                      | Saragiotto, , BT, Maher, CG, Yamato, TP, Costa, LOP, Menezes Costa, LC, Ostelo, RWJG; Macedo, LG                                                                                                                                                                                          | 2016 |
| Micronutrient supplementation in adults with HIV infection                                                                                                                         | Visser, , ME, Durao, S, Sinclair, D, Irlam, JH; Siegfried, N                                                                                                                                                                                                                              | 2017 |
| Milk thistle for alcoholic and/or hepatitis B or C virus liver diseases                                                                                                            | Rambaldi, , A, Jacobs, BP; Gluud, C                                                                                                                                                                                                                                                       | 2007 |
| Managed alcohol as a harm reduction intervention for alcohol addiction in populations at high risk for substance abuse                                                             | Muckle, , W, Muckle, J, Welch, V; Tugwell, P                                                                                                                                                                                                                                              | 2012 |
| Mobile phone messaging reminders for attendance at healthcare appointments                                                                                                         | Gurol-Urganci, , I, de Jongh, T, Vodopivec-Jamsek, V, Atun, R; Car, J                                                                                                                                                                                                                     | 2013 |
| Mycophenolate mofetil for relapsing-remitting multiple sclerosis                                                                                                                   | Xiao, , Y, Huang, J, Luo, H; Wang, J                                                                                                                                                                                                                                                      | 2014 |
| Medical interventions for traumatic hyphema                                                                                                                                        | Gharaibeh, , A, Savage, HI, Scherer, RW, Goldberg, MF; Lindsley, K                                                                                                                                                                                                                        | 2019 |
| Male involvement for increasing the effectiveness of prevention of mother-to-child HIV transmission (PMTCT) programmes                                                             | Brusamento, , S, Ghanotakis, E, Tudor Car, L, van-Velthoven, MHMMT, Majeed, A; Car, J                                                                                                                                                                                                     | 2012 |

|                                                                                                                                                                    |                                                                                                                                                                                   |      |
|--------------------------------------------------------------------------------------------------------------------------------------------------------------------|-----------------------------------------------------------------------------------------------------------------------------------------------------------------------------------|------|
| Medical treatments for idiopathic thrombocytopenic purpura during pregnancy                                                                                        | Martí-Carvajal, , AJ, Peña-Martí, GE; Comunián-Carrasco, G                                                                                                                        | 2009 |
| Memantine for dementia                                                                                                                                             | McShane, , R, Westby, MJ, Roberts, E, Minakaran, N, Schneider, L, Farrimond, LE, Maayan, N, Ware, J; Debarros, J                                                                  | 2019 |
| Memory rehabilitation for people with multiple sclerosis                                                                                                           | das Nair, , R, Martin, KJ; Lincoln, NB                                                                                                                                            | 2016 |
| Music-based therapeutic interventions for people with dementia                                                                                                     | van der Steen, , JT, Smaling, HJA, van der Wouden, JC, Bruinsma, MS, Scholten, RJPM; Vink, AC                                                                                     | 2018 |
| Multiple-micronutrient supplementation for women during pregnancy                                                                                                  | Keats, , EC, Haider, BA, Tam, E; Bhutta, ZA                                                                                                                                       | 2019 |
| Miscellaneous treatments for antipsychotic-induced tardive dyskinesia                                                                                              | Soares-Weiser, , K, Rathbone, J, Ogawa, Y, Shinohara, K; Bergman, H                                                                                                               | 2018 |
| Marine-derived n-3 fatty acids therapy for stroke                                                                                                                  | Alvarez Campano, , CG, Macleod, MJ, Aucott, L; Thies, F                                                                                                                           | 2019 |
| Planned early birth versus expectant management for women with preterm prelabour rupture of membranes prior to 37 weeks' gestation for improving pregnancy outcome | Bond, , DM, Middleton, P, Levett, KM, van der Ham, DP, Crowther, CA, Buchanan, SL; Morris, J                                                                                      | 2017 |
| Pioglitazone for type 2 diabetes mellitus                                                                                                                          | Richter, , B, Bandeira-Echtler, E, Bergerhoff, K, Clar, C; Ebrahim, SH                                                                                                            | 2006 |
| Person-directed, non-pharmacological interventions for sleepiness at work and sleep disturbances caused by shift work                                              | Slanger, , TE, Gross, JV, Pinger, A, Morfeld, P, Bellinger, M, Duhme, AL, Reichardt Ortega, RA, Costa, G, Driscoll, TR, Foster, RG, Fritschi, L, Sallinen, M, Liira, J; Erren, TC | 2016 |
| Pharmacological treatment for aphasia following stroke                                                                                                             | Greener, , J, Enderby, P; Whurr, R                                                                                                                                                | 2001 |
| Plasma transfusion strategies for critically ill patients                                                                                                          | Karam, , O, Tucci, M, Combescure, C, Lacroix, J; Rimensberger, PC                                                                                                                 | 2013 |
| Physiotherapy for Parkinson's disease: a comparison of techniques                                                                                                  | Tomlinson, , CL, Herd, CP, Clarke, CE, Meek, C, Patel, S, Stowe, R, Deane, KHO, Shah, L, Sackley, CM, Wheatley, K; Ives, N                                                        | 2014 |
| Pharmacological interventions for pain in children and adolescents with life-limiting conditions                                                                   | Beecham, , E, Candy, B, Howard, R, McCulloch, R, Laddie, J, Rees, H, Vickerstaff, V, Bluebond-Langner, M; Jones, L                                                                | 2015 |
| Pharmacotherapy for smoking cessation: effects by subgroup defined by genetically informed biomarkers                                                              | Schuit, , E, Panagiotou, OA, Munafò, MR, Bennett, DA, Bergen, AW; David, SP                                                                                                       | 2017 |
| Pessaries (mechanical devices) for pelvic organ prolapse in women                                                                                                  | Bugge, , C, Adams, EJ, Gopinath, D; Reid, F                                                                                                                                       | 2013 |
| Physiotherapy interventions for ankylosing spondylitis                                                                                                             | Dagfinrud, , H, Hagen, KB; Kvien, TK                                                                                                                                              | 2008 |
| Pharmacotherapy for sleep bruxism                                                                                                                                  | Macedo, , CR, Macedo, EC, Torloni, MR, Silva, AB; Prado, GF                                                                                                                       | 2014 |
| Piracetam for acute ischaemic stroke                                                                                                                               | Ricci, , S, Celani, MG, Cantisani, TA; Righetti, E                                                                                                                                | 2012 |
| Phototherapy for treating foot ulcers in people with diabetes                                                                                                      | Wang, , HT, Yuan, JQ, Zhang, B, Dong, ML, Mao, C; Hu, D                                                                                                                           | 2017 |
| Phosphodiesterase III inhibitors for heart failure                                                                                                                 | Amsellem, , E, Kasparian, C, Haddour, G, Boissel, JP; Nony, P                                                                                                                     | 2005 |
| Pilates for low back pain                                                                                                                                          | Yamato, , TP, Maher, CG, Saragiotto, BT, Hancock, MJ, Ostelo, RWJG, Cabral, CMN, Menezes Costa, LC; Costa, LOP                                                                    | 2015 |
| Pharmacotherapies for sleep disturbances in dementia                                                                                                               | McCleery, , J, Cohen, DA; Sharpley, AL                                                                                                                                            | 2016 |
| Planned early delivery versus expectant management for hypertensive disorders from 34 weeks gestation to term                                                      | Cluver, , C, Novikova, N, Koopmans, CM; West, HM                                                                                                                                  | 2017 |
| Physiotherapy versus placebo or no intervention in Parkinson's disease                                                                                             | Tomlinson, , CL, Patel, S, Meek, C, Herd, CP, Clarke, CE, Stowe, R, Shah, L, Sackley, CM, Deane, KHO, Wheatley, K; Ives, N                                                        | 2013 |
| Pharmacological interventions for clozapine-induced hypersalivation                                                                                                | Syed, , R, Au, K, Cahill, C, Duggan, L, He, Y, Udu, V; Xia, J                                                                                                                     | 2008 |
| Plasma interleukin-6 concentration for the diagnosis of sepsis in critically ill adults                                                                            | Molano Franco, , D, Arevalo-Rodriguez, I, Roqué i Figuls, M, Montero Oleas, NG, Nuvials, X; Zamora, J                                                                             | 2019 |
| Physiotherapy interventions for shoulder pain                                                                                                                      | Green, , S, Buchbinder, R; Hetrick, SE                                                                                                                                            | 2003 |
| Plugs for containing faecal incontinence                                                                                                                           | Deutekom, , M; Dobben, AC                                                                                                                                                         | 2015 |
| Post-operative therapy for metacarpophalangeal arthroplasty                                                                                                        | Massy-Westropp, , N, Johnston, RV; Hill, CL                                                                                                                                       | 2008 |
| Polyunsaturated fatty acid supplementation for schizophrenia                                                                                                       | Irving, , CB, Mumby-Croft, R; Joy, LA                                                                                                                                             | 2006 |
| Positioning for acute respiratory distress in hospitalised infants and children                                                                                    | Gillies, , D, Wells, D; Bhandari, AP                                                                                                                                              | 2012 |
| Physical training for asthma                                                                                                                                       | Carson, , KV, Chandratilleke, MG, Picot, J, Brinn, MP, Esterman, AJ; Smith, BJ                                                                                                    | 2013 |
| Physical health care monitoring for people with serious mental illness                                                                                             | Tosh, , G, Clifton, AV, Xia, J; White, MM                                                                                                                                         | 2014 |
| Pharmacologic interventions for treating phantom limb pain                                                                                                         | Alviar, , MJM, Hale, T; Lim-Dungca, M                                                                                                                                             | 2016 |
| Pharmacological interventions for ischaemia reperfusion injury in liver resection surgery performed under vascular control                                         | Abu-Amara, , M, Gurusamy, KS, Glantzounis, G, Fuller, B; Davidson, BR                                                                                                             | 2009 |
| Pharmacological interventions for non-alcohol related fatty liver disease (NAFLD)                                                                                  | Lombardi, , R, Onali, S, Thorburn, D, Davidson, BR, Gurusamy, KS; Tsochatzis, E                                                                                                   | 2017 |
| Phototherapy for treating pressure ulcers                                                                                                                          | Chen, , C, Hou, WH, Chan, ESY, Yeh, ML; Lo, HLD                                                                                                                                   | 2014 |
| Positive end-expiratory pressure (PEEP) during anaesthesia for prevention of mortality and postoperative pulmonary complications                                   | Barbosa, , FT, Castro, AA; de Sousa-Rodrigues, CF                                                                                                                                 | 2014 |
| Pit and fissure sealants for preventing dental decay in permanent teeth                                                                                            | Ahovuo-Saloranta, , A, Forss, H, Walsh, T, Nordblad, A, Mäkelä, M; Worthington, HV                                                                                                | 2017 |



|                                                                                                                                                                             |                                                                                                                                                 |      |
|-----------------------------------------------------------------------------------------------------------------------------------------------------------------------------|-------------------------------------------------------------------------------------------------------------------------------------------------|------|
| Pharmacotherapy for chronic cognitive impairment in traumatic brain injury                                                                                                  | Dougall, , D, Poole, N; Agrawal, N                                                                                                              | 2015 |
| Physical conditioning as part of a return to work strategy to reduce sickness absence for workers with back pain                                                            | Schaafsma, , FG, Whelan, K, van der Beek, AJ, van der Es-Lambeck, LC, Ojajärvi, A; Verbeek, JH                                                  | 2013 |
| Placebo interventions for all clinical conditions                                                                                                                           | Hróbjartsson, , A; Gøtzsche, PC                                                                                                                 | 2010 |
| Post-pyloric versus gastric tube feeding for preventing pneumonia and improving nutritional outcomes in critically ill adults                                               | Alkhwaja, , S, Martin, C, Butler, RJ; Gwadry-Sridhar, F                                                                                         | 2015 |
| Physical training for bronchiectasis                                                                                                                                        | Bradley, , JM, Moran, F; Greenstone, M                                                                                                          | 2002 |
| Perioperative statin therapy for improving outcomes during and after noncardiac vascular surgery                                                                            | Sanders, , RD, Nicholson, A, Lewis, SR, Smith, AF; Alderson, P                                                                                  | 2013 |
| Pharmacological interventions for treating heart failure in patients with Chagas cardiomyopathy                                                                             | Marti-Carvajal, , AJ; Kwong, JSW                                                                                                                | 2016 |
| Planned hospital birth versus planned home birth                                                                                                                            | Olsen, , O; Clausen, JA                                                                                                                         | 2012 |
| Postoperative adjuvant chemotherapy in rectal cancer operated for cure.                                                                                                     | Petersen, , SH, Harling, H, Kirkeby, LT, Wille-Jørgensen, P; Mocellin, S                                                                        | 2012 |
| Pneumococcal vaccination during pregnancy for preventing infant infection                                                                                                   | Chaithongwongwatthana, , S, Yamasmit, W, Limpongsanurak, S, Lumbiganon, P; Tolosa, JE                                                           | 2015 |
| Phlebotonics for venous insufficiency                                                                                                                                       | Martinez-Zapata, , MJ, Vernooij, RWM, Uriona Tuma, SM, Stein, AT, Moreno, RM, Vargas, E, Capellà, D; Bonfill Cosp, X                            | 2016 |
| Physical interventions to interrupt or reduce the spread of respiratory viruses                                                                                             | Jefferson, , T, Del Mar, CB, Dooley, L, Ferroni, E, Al-Ansary, LA, Bawazeer, GA, van Driel, ML, Nair, S, Jones, MA, Thorning, S; Conly, JM      | 2011 |
| Plasma transfusions prior to lumbar punctures and epidural catheters for people with abnormal coagulation                                                                   | Estcourt, , LJ, Desborough, MJ, Doree, C, Hopewell, S; Stanworth, SJ                                                                            | 2017 |
| Platinum versus non-platinum chemotherapy regimens for small cell lung cancer                                                                                               | Amarasena, , IU, Chatterjee, S, Walters, JAE, Wood-Baker, R; Fong, KM                                                                           | 2015 |
| Pharmacotherapy for hypertension in adults aged 18 to 59 years                                                                                                              | Musini, , VM, Gueyffier, F, Puil, L, Salzwedel, DM; Wright, JM                                                                                  | 2017 |
| Pharmacological interventions for alcoholic liver disease (alcohol-related liver disease)                                                                                   | Buzzetti, , E, Kalafateli, M, Thorburn, D, Davidson, BR, Thiele, M, Glud, LL, Del Giovane, C, Askgaard, G, Krag, A, Tsochatzis, E; Gurusamy, KS | 2017 |
| Pharmacological treatment of vascular risk factors for reducing mortality and cardiovascular events in patients with abdominal aortic aneurysm                              | Robertson, , L, Atallah, E; Stansby, G                                                                                                          | 2017 |
| Phosphodiesterase 4 inhibitors for chronic obstructive pulmonary disease                                                                                                    | Chong, , J, Leung, B; Poole, P                                                                                                                  | 2017 |
| Post-exposure passive immunisation for preventing rubella and congenital rubella syndrome                                                                                   | Young, , MK, Cripps, AW, Nimmo, GR; van Driel, ML                                                                                               | 2015 |
| Pharmacological interventions for acute hepatitis B infection                                                                                                               | Mantzoukis, , K, Rodríguez-Perálvarez, M, Buzzetti, E, Thorburn, D, Davidson, BR, Tsochatzis, E; Gurusamy, KS                                   | 2017 |
| Pimozide for schizophrenia or related psychoses                                                                                                                             | Mothi, , M; Sampson, S                                                                                                                          | 2013 |
| Portion, package or tableware size for changing selection and consumption of food, alcohol and tobacco                                                                      | Hollands, , GJ, Shemilt, I, Marteau, TM, Jebb, SA, Lewis, HB, Wei, Y, Higgins, JPT; Ogilvie, D                                                  | 2015 |
| Pharmacological interventions for antisocial personality disorder                                                                                                           | Khalifa, , N, Duggan, C, Stoffers, J, Huband, N, Völlm, BA, Ferriter, M; Lieb, K                                                                | 2010 |
| Platelet glycoprotein IIb/IIIa blockers during percutaneous coronary intervention and as the initial medical treatment of non-ST segment elevation acute coronary syndromes | Bosch, , X, Marrugat, J; Sanchis, J                                                                                                             | 2013 |
| Physical rehabilitation approaches for the recovery of function and mobility following stroke                                                                               | Pollock, , A, Baer, G, Campbell, P, Choo, PL, Forster, A, Morris, J, Pomeroy, VM; Langhorne, P                                                  | 2014 |
| Piggy-back graft for liver transplantation                                                                                                                                  | Gurusamy, , KS, Pamecha, V; Davidson, BR                                                                                                        | 2011 |
| Polysaccharide vaccines for preventing serogroup A meningococcal meningitis                                                                                                 | Patel, , M; Lee, CK                                                                                                                             | 2005 |
| Personally tailored activities for improving psychosocial outcomes for people with dementia in long-term care                                                               | Möhler, , R, Renom, A, Renom, H; Meyer, G                                                                                                       | 2018 |
| Photodynamic therapy for recurrent respiratory papillomatosis                                                                                                               | Lieder, , A, Khan, MK; Lippert, BM                                                                                                              | 2014 |
| Postnatal thyroid hormones for preterm infants with transient hypothyroxinaemia                                                                                             | Osborn, , DA; Hunt, R                                                                                                                           | 2007 |
| Pharmacological interventions for sleepiness and sleep disturbances caused by shift work                                                                                    | Liira, , J, Verbeek, JH, Costa, G, Driscoll, TR, Sallinen, M, Isotalo, LK; Ruotsalainen, JH                                                     | 2014 |
| Pharmacological interventions for those who have sexually offended or are at risk of offending                                                                              | Khan, , O, Ferriter, M, Huband, N, Powney, MJ, Dennis, JA; Duggan, C                                                                            | 2015 |
| Piracetam for dementia or cognitive impairment                                                                                                                              | Flicker, , L; Grimley Evans, J                                                                                                                  | 2004 |
| Polyclonal anti-thymocyte globulins for the prophylaxis of graft-versus-host disease after allogeneic stem cell or bone marrow transplantation in adults                    | Theurich, , S, Fischmann, H, Shimabukuro-Vornhagen, A, Chemnitz, JM, Holtick, U, Scheid, C, Skoetz, N; von Bergwelt-Baildon, M                  | 2012 |
| Pharmacological interventions for generalised itching (not caused by systemic disease or skin lesions) in pregnancy                                                         | Rungsiprakarn, , P, Laopaiboon, M, Sangkomkamhang, US; Lumbiganon, P                                                                            | 2016 |
| Polyunsaturated fatty acids (PUFA) for attention deficit hyperactivity disorder (ADHD) in children and adolescents                                                          | Gillies, , D, Sinn, JKH, Lad, SS, Leach, MJ; Ross, MJ                                                                                           | 2012 |
| Pit and fissure sealants versus fluoride varnishes for preventing dental decay in the permanent teeth of children and adolescents                                           | Ahovuo-Saloranta, , A, Forss, H, Hiiri, A, Nordblad, A; Mäkelä, M                                                                               | 2016 |
| Post-operative radiotherapy for ductal carcinoma in situ of the breast                                                                                                      | Goodwin, , A, Parker, S, Ghera, D; Wilcken, N                                                                                                   | 2013 |

|                                                                                                                                                                                        |                                                                                                                                                                            |      |
|----------------------------------------------------------------------------------------------------------------------------------------------------------------------------------------|----------------------------------------------------------------------------------------------------------------------------------------------------------------------------|------|
| Positive end-expiratory pressure for preterm infants requiring conventional mechanical ventilation for respiratory distress syndrome or bronchopulmonary dysplasia                     | Bamat, , N, Fierro, J, Wang, Y, Millar, D; Kirpalani, H                                                                                                                    | 2019 |
| Planned birth at or near term for improving health outcomes for pregnant women with gestational diabetes and their infants                                                             | Biesty, , LM, Egan, AM, Dunne, F, Dempsey, E, Meskeel, P, Smith, V, Ni Bhuinneain, GM; Devane, D                                                                           | 2018 |
| Pharmacological therapies for maintenance treatments of opium dependence                                                                                                               | Rahimi-Movaghar, , A, Amin-Esmacili, M, Hefazi, M; Yousefi-Nooraie, R                                                                                                      | 2013 |
| Polyclonal and monoclonal antibodies for treating acute rejection episodes in kidney transplant recipients                                                                             | Webster, , AC, Wu, S, Tallapragada, K, Park, MY, Chapman, JR; Carr, SJ                                                                                                     | 2017 |
| Pharmacological interventions for preventing complications in idiopathic hypercalciuria                                                                                                | Escribano, , J, Balaguer, A, Pagone, F, Feliu, A; Roqué i Figuls, M                                                                                                        | 2009 |
| Plasma exchange for chronic inflammatory demyelinating polyradiculoneuropathy                                                                                                          | Mehndiratta, , MM, Hughes, RAC; Pritchard, J                                                                                                                               | 2015 |
| Phyllanthus species for chronic hepatitis B virus infection                                                                                                                            | Xia, , Y, Luo, H, Liu, JP; Glud, C                                                                                                                                         | 2011 |
| Pharmacological and nutritional treatment for McArdle disease (Glycogen Storage Disease type V)                                                                                        | Quinlivan, , R, Martinuzzi, A; Schoser, B                                                                                                                                  | 2014 |
| Peritoneal drainage versus laparotomy as initial surgical treatment for perforated necrotizing enterocolitis or spontaneous intestinal perforation in preterm low birth weight infants | Rao, , SC, Basani, L, Simmer, K, Samnakay, N; Deshpande, G                                                                                                                 | 2011 |
| Personalised digital interventions for reducing hazardous and harmful alcohol consumption in community-dwelling populations                                                            | Kaner, , EFS, Beyer, FR, Garnett, C, Crane, D, Brown, J, Muirhead, C, Redmore, J, O'Donnell, A, Newham, JJ, de Vocht, F, Hickman, M, Brown, H, Maniatopoulos, G; Michie, S | 2017 |
| Pharmacological interventions for somatoform disorders in adults                                                                                                                       | Kleinstäuber, , M, Withöft, M, Steffanowski, A, van Marwijk, H, Hiller, W; Lambert, MJ                                                                                     | 2014 |
| Pool fencing for preventing drowning of children                                                                                                                                       | Thompson, , DC; Rivara, F                                                                                                                                                  | 1998 |
| Physical fitness training for stroke patients                                                                                                                                          | Saunders, , DH, Sanderson, M, Hayes, S, Kilrane, M, Greig, CA, Brazzelli, M; Mead, GE                                                                                      | 2016 |
| Pharmacological interventions for hypertension in children                                                                                                                             | Chaturvedi, , S, Lipszyc, DH, Licht, C, Craig, JC; Parekh, R                                                                                                               | 2014 |
| Powered versus manual toothbrushing for oral health                                                                                                                                    | Yaacob, , M, Worthington, HV, Deacon, SA, Deery, C, Walmsley, AD, Robinson, PG; Glenn, AM                                                                                  | 2014 |
| Pharmacotherapy for Behcet's syndrome                                                                                                                                                  | Saenz, , A, Ausejo, M, Shea, B, Wells, GA, Welch, V; Tugwell, P                                                                                                            | 1998 |
| Pharmacological treatments for Friedreich ataxia                                                                                                                                       | Kearney, , M, Orrell, RW, Fahey, M, Brassington, R; Pandolfo, M                                                                                                            | 2016 |
| Personalised asthma action plans for adults with asthma                                                                                                                                | Gatheral, , TL, Rushton, A, Evans, DJW, Mulvaney, CA, Halcovitch, NR, Whiteley, G, Eccles, FJR; Spencer, S                                                                 | 2017 |
| Pharmacological treatment for depression during opioid agonist treatment for opioid dependence                                                                                         | Pani, , PP, Vacca, R, Trogu, E, Amato, L; Davoli, M                                                                                                                        | 2010 |
| Positron emission tomography-adapted therapy for first-line treatment in individuals with Hodgkin lymphoma                                                                             | Sickinger, , MT, von Tresckow, B, Kobe, C, Engert, A, Borchmann, P; Skoetz, N                                                                                              | 2015 |
| Posterior versus lateral surgical approach for total hip arthroplasty in adults with osteoarthritis                                                                                    | Jolles, , BM; Bogoch, ER                                                                                                                                                   | 2006 |
| Plasma exchange for generalised myasthenia gravis                                                                                                                                      | Gajdos, , P, Chevret, S; Toyka, KV                                                                                                                                         | 2002 |
| Postoperative radiotherapy for non-small cell lung cancer                                                                                                                              | Burdett, , S, Rydzewska, L, Tierney, J, Fisher, D, Parmar, MKB, Arriagada, R, Pignon, JP; Le Pechoux, C                                                                    | 2016 |
| Peri-operative glycaemic control regimens for preventing surgical site infections in adults                                                                                            | Kao, , LS, Meeks, D, Moyer, VA; Lally, KP                                                                                                                                  | 2009 |
| Planned early delivery versus expectant management of the term suspected compromised baby for improving outcomes                                                                       | Bond, , DM, Gordon, A, Hyett, J, de Vries, B, Carberry, AE; Morris, J                                                                                                      | 2015 |
| Physical activity programs for promoting bone mineralization and growth in preterm infants                                                                                             | Schulzke, , SM, Kaempfen, S, Trachsel, D; Patole, SK                                                                                                                       | 2014 |
| Pharmacological interventions for acute pancreatitis                                                                                                                                   | Moggia, , E, Koti, R, Belgaumkar, AP, Fazio, F, Pereira, SP, Davidson, BR; Gurusamy, KS                                                                                    | 2017 |
| Pharmacologic treatment of depression in multiple sclerosis                                                                                                                            | Koch, , MW, Glazenborg, A, Uyttenboogaart, M, Mostert, J; De Keyser, J                                                                                                     | 2011 |
| Peri-implantation glucocorticoid administration for assisted reproductive technology cycles                                                                                            | Boomsma, , CM, Keay, SD; Macklon, NS                                                                                                                                       | 2012 |
| Pneumococcal vaccines for children and adults with bronchiectasis                                                                                                                      | Chang, , CC, Singleton, RJ, Morris, PS; Chang, AB                                                                                                                          | 2009 |
| Plasma volume expansion for treatment of pre-eclampsia                                                                                                                                 | Duley, , L, Williams, J; Henderson-Smart, DJ                                                                                                                               | 1999 |
| Pneumococcal vaccine for asthma                                                                                                                                                        | Sheikh, , A, Alves, B; Dhami, S                                                                                                                                            | 2002 |
| Pharmacological interventions for self-injurious behaviour in adults with intellectual disabilities                                                                                    | Rana, , F, Gormez, A; Varghese, S                                                                                                                                          | 2013 |
| Planned caesarean section versus planned vaginal birth for severe pre-eclampsia                                                                                                        | Amorim, , MMR, Souza, ASR; Katz, L                                                                                                                                         | 2017 |
| Peroxisome proliferator-activated receptor gamma agonists for preventing recurrent stroke and other vascular events in people with stroke or transient ischaemic attack                | Liu, , J; Wang, LN                                                                                                                                                         | 2017 |
| Perphenazine for schizophrenia                                                                                                                                                         | Hartung, , B, Sampson, S; Leucht, S                                                                                                                                        | 2015 |
| Physical activity for women with breast cancer after adjuvant therapy                                                                                                                  | Lahart, , IM, Metsios, GS, Nevill, AM; Carmichael, AR                                                                                                                      | 2018 |
| Placebo response and remission rates in randomised trials of induction and maintenance therapy for ulcerative colitis                                                                  | Jairath, , V, Zou, GY, Parker, CE, MacDonald, JK, AlAmeel, T, Al Beshir, M, Almadi, MA, Al-Taweel, T, Atkinson, NSS,                                                       | 2017 |

|                                                                                                                                                                                    |                                                                                                                                                                       |      |
|------------------------------------------------------------------------------------------------------------------------------------------------------------------------------------|-----------------------------------------------------------------------------------------------------------------------------------------------------------------------|------|
|                                                                                                                                                                                    | Biswas, S, Chapman, T, Dulai, PS, Glaire, MA, Hoekman, DR, Koutsoumpas, A, Minas, E, Mosli, MH, Samaan, M, Khanna, R, Travis, S, D'Haens, G, Sandborn, WJ; Feagan, BG |      |
| Positive expiratory pressure physiotherapy for airway clearance in people with cystic fibrosis                                                                                     | McIlwaine, , M, Button, B; Dwan, K                                                                                                                                    | 2015 |
| Pharmacological agents for the prevention of vestibular migraine                                                                                                                   | Maldonado Fernández, , M, Birdi, JS, Irving, GJ, Murrin, L, Kivekäs, I; Strupp, M                                                                                     | 2015 |
| Physical training for McArdle disease                                                                                                                                              | Quinlivan, , R, Vissing, J, Hilton-Jones, D; Buckley, J                                                                                                               | 2011 |
| Plasma and cerebrospinal fluid amyloid beta for the diagnosis of Alzheimer's disease dementia and other dementias in people with mild cognitive impairment (MCI)                   | Ritchie, , C, Smailagic, N, Noel-Storr, AH, Takwoingi, Y, Flicker, L, Mason, SE; McShane, R                                                                           | 2014 |
| Physician anaesthetists versus non-physician providers of anaesthesia for surgical patients                                                                                        | Lewis, , SR, Nicholson, A, Smith, AF; Alderson, P                                                                                                                     | 2014 |
| Pharmacological interventions for pain in patients with temporomandibular disorders                                                                                                | Mujakperuo, , HR, Watson, M, Morrison, R; Macfarlane, TV                                                                                                              | 2010 |
| Pneumococcal vaccines for sickle cell disease                                                                                                                                      | Davies, , EG, Hirst, C, Lottenberg, R; Dower, N                                                                                                                       | 2004 |
| Population-based biomedical sexually transmitted infection control interventions for reducing HIV infection                                                                        | Ng, , BE, Butler, LM, Horvath, T; Rutherford, GW                                                                                                                      | 2011 |
| Perioperative nutrition for the treatment of bladder cancer by radical cystectomy                                                                                                  | Burden, , S, Billson, HA, Lal, S, Owen, KA; Muneer, A                                                                                                                 | 2019 |
| Physician advice for smoking cessation                                                                                                                                             | Stead, , LF, Buitrago, D, Preciado, N, Sanchez, G, Hartmann-Boyce, J; Lancaster, T                                                                                    | 2013 |
| Plasma volume expansion for suspected impaired fetal growth                                                                                                                        | Say, , L, Gülmezoglu, AM; Hofmeyr, GJ                                                                                                                                 | 1996 |
| Pharmaceutical policies: effects of restrictions on reimbursement                                                                                                                  | Green, , CJ, Maclure, M, Fortin, PM, Ramsay, CR, Aaserud, M; Bardal, S                                                                                                | 2010 |
| Polyunsaturated fatty acids (PUFAs) for children with specific learning disorders                                                                                                  | Tan, , ML, Ho, JJ; Teh, KH                                                                                                                                            | 2016 |
| Polyclonal and monoclonal antibodies for induction therapy in kidney transplant recipients                                                                                         | Hill, , P, Cross, NB, Barnett, ANR, Palmer, SC; Webster, AC                                                                                                           | 2017 |
| Pharmacological interventions for the treatment of delirium in critically ill adults                                                                                               | Burry, , L, Hutton, B, Williamson, DR, Mehta, S, Adhikari, NKJ, Cheng, W, Ely, EW, Egerod, I, Fergusson, DA; Rose, L                                                  | 2019 |
| Positron emission tomography (PET) and magnetic resonance imaging (MRI) for assessing tumour resectability in advanced epithelial ovarian/fallopian tube/primary peritoneal cancer | Roze, , JF, Hoogendam, JP, van de Wetering, FT, Spijker, R, Verleye, L, Vlayen, J, Veldhuis, WB, Scholten, RJP; Zweekmer, RP                                          | 2018 |
| Population-level interventions in government jurisdictions for dietary sodium reduction                                                                                            | McLaren, , L, Sumar, N, Barberio, AM, Trieu, K, Lorenzetti, DL, Tarasuk, V, Webster, J; Campbell, NRC                                                                 | 2016 |
| Pharmacotherapies that specifically target ammonia for the prevention and treatment of hepatic encephalopathy in adults with cirrhosis                                             | Zacharias, , HD, Zacharias, AP, Gluud, LL; Morgan, MY                                                                                                                 | 2019 |
| Pharmacological interventions for clozapine-induced sinus tachycardia                                                                                                              | Lally, , J, Docherty, MJ; MacCabe, JH                                                                                                                                 | 2016 |
| Planned home versus hospital care for preterm prelabour rupture of the membranes (PPROM) prior to 37 weeks' gestation                                                              | Abou El Senoun, , G, Dowswell, T; Mousa, HA                                                                                                                           | 2014 |
| Post-surgical chemotherapy versus surgery alone for resectable gastric cancer                                                                                                      | Diaz-Nieto, , R, Orti-Rodríguez, R; Winslet, M                                                                                                                        | 2013 |
| Pharmacological interventions versus no pharmacological intervention for ischaemia reperfusion injury in liver resection surgery performed under vascular control                  | Abu-Amara, , M, Gurusamy, KS, Hori, S, Glantzounis, G, Fuller, B; Davidson, BR                                                                                        | 2009 |
| Personalised risk communication for informed decision making about taking screening tests                                                                                          | Edwards, , AGK, Naik, G, Ahmed, H, Elwyn, GJ, Pickles, T, Hood, K; Playle, R                                                                                          | 2013 |
| Personal protective equipment for preventing highly infectious diseases due to exposure to contaminated body fluids in healthcare staff                                            | Verbeek, , JH, Rajamaki, B, Ijaz, S, Tikka, C, Ruotsalainen, JH, Edmond, MB, Sauni, R; Kilinc Balci, FS                                                               | 2019 |
| Permissive hypoxaemia versus normoxaemia for mechanically ventilated critically ill patients                                                                                       | Gilbert-Kawai, , ET, Mitchell, K, Martin, D, Carlisle, J; Grocott, MPW                                                                                                | 2014 |
| Pharmacological interventions for preventing dry mouth and salivary gland dysfunction following radiotherapy                                                                       | Riley, , P, Glenny, AM, Hua, F; Worthington, HV                                                                                                                       | 2017 |
| Phlebotonics for haemorrhoids                                                                                                                                                      | Perera, , N, Liolitsa, D, Iype, S, Croxford, A, Yassin, M, Lang, P, Ukaegbu, O; van Isum, C                                                                           | 2012 |
| Potentiators (specific therapies for class III and IV mutations) for cystic fibrosis                                                                                               | Skilton, , M, Krishan, A, Patel, S, Sinha, IP; Southern, KW                                                                                                           | 2019 |
| Pharmacological interventions for borderline personality disorder                                                                                                                  | Stoffers, , J, Völlm, BA, Rücker, G, Timmer, A, Huband, N; Lieb, K                                                                                                    | 2010 |
| Pharmacological treatment other than corticosteroids, intravenous immunoglobulin and plasma exchange for Guillain-Barré syndrome                                                   | Pritchard, , J, Hughes, RAC, Hadden, RDM; Brassington, R                                                                                                              | 2016 |
| Pharmacological interventions for acute hepatitis C infection                                                                                                                      | Kalafateli, , M, Buzzetti, E, Thorburn, D, Davidson, BR, Tsochatzis, E; Gurusamy, KS                                                                                  | 2018 |
| Physical rehabilitation for critical illness myopathy and neuropathy                                                                                                               | Mehrholz, , J, Pohl, M, Kugler, J, Burrage, J, Mueckel, S; Elsner, B                                                                                                  | 2015 |
| Physical methods for preventing deep vein thrombosis in stroke                                                                                                                     | Naccarato, , M, Chiodo Grandi, F, Dennis, M; Sandercock, PAG                                                                                                          | 2010 |
| Physical exercise training for type 3 spinal muscular atrophy                                                                                                                      | Bartels, , B, Montes, J, van der Pol, WL; de Groot, JF                                                                                                                | 2019 |
| Pharmacological interventions for apathy in Alzheimer's disease                                                                                                                    | Ruthirakuhan, , MT, Herrmann, N, Abraham, EH, Chan, S; Lanctôt, KL                                                                                                    | 2018 |
| Pharyngeal instillation of surfactant before the first breath for prevention of morbidity and mortality in preterm infants at risk of respiratory distress syndrome                | Abdel-Latif, , ME; Osborn, DA                                                                                                                                         | 2011 |

|                                                                                                                          |                                                                                                                                               |      |
|--------------------------------------------------------------------------------------------------------------------------|-----------------------------------------------------------------------------------------------------------------------------------------------|------|
| Photorefractive keratectomy (PRK) versus laser assisted in situ keratomileusis (LASIK) for hyperopia correction          | Settas, , G, Settas, C, Minos, E; Yeung, IYL                                                                                                  | 2012 |
| Pneumococcal conjugate vaccines for preventing acute otitis media in children                                            | Fortanier, , AC, Venekamp, RP, Boonacker, CWB, Hak, E, Schilder, AGM, Sanders, EAM; Damoiseaux, RAMJ                                          | 2019 |
| Pharmaceutical policies: effects of reference pricing, other pricing, and purchasing policies                            | Acosta, , A, Ciapponi, A, Aaserud, M, Vietto, V, Austvoll-Dahlgren, A, K sters, JP, Vacca, C, Machado, M, Diaz Ayala, DH; Oxman, AD           | 2014 |
| Plasma expanders for people with cirrhosis and large ascites treated with abdominal paracentesis                         | Simonetti, , RG, Perricone, G, Nikolova, D, Bjelakovic, G; Gluud, C                                                                           | 2019 |
| Pharmacological treatment for psychotic depression                                                                       | Wijkstra, , J, Lijmer, J, Burger, H, Cipriani, A, Geddes, J; Nolen, WA                                                                        | 2015 |
| Pre and peri-operative erythropoietin for reducing allogeneic blood transfusions in colorectal cancer surgery.           | Devon, , KM; McLeod, RS                                                                                                                       | 2009 |
| PET-CT for assessing mediastinal lymph node involvement in patients with suspected resectable non-small cell lung cancer | Schmidt-Hansen, , M, Baldwin, DR, Hasler, E, Zamora, J, Abaira, V; Roqu  i Figuls, M                                                          | 2014 |
| Pharmacological treatments for preventing epilepsy following traumatic head injury                                       | Thompson, , K, Pohlmann-Eden, B, Campbell, LA; Abel, H                                                                                        | 2015 |
| Physical exercise for people with cirrhosis                                                                              | Aamann, , L, Dam, G, Rinnov, AR, Vilstrup, H; Gluud, LL                                                                                       | 2018 |
| Platelet-rich-plasmapheresis for minimising peri-operative allogeneic blood transfusion                                  | Carless, , PA, Rubens, FD, Anthony, DM, O'Connell, D; Henry, DA                                                                               | 2011 |
| Prazosin for Raynaud's phenomenon in progressive systemic sclerosis                                                      | Harding, , SE, Tingey, PC, Pope, J, Fenlon, D, Furst, D, Shea, B, Silman, A, Thompson, A; Wells, GA                                           | 1998 |
| Phosphodiesterase inhibitors for lower urinary tract symptoms consistent with benign prostatic hyperplasia               | Pattanaik, , S, Mavuduru, RS, Panda, A, Mathew, JL, Agarwal, MM, Hwang, EC, Lyon, JA, Singh, SK; Mandal, AK                                   | 2018 |
| Pharmacological interventions for the treatment of anxiety disorders in chronic obstructive pulmonary disease            | Usmani, , ZA, Carson, KV, Cheng, JN, Esterman, AJ; Smith, BJ                                                                                  | 2011 |
| Pharmacological interventions for promoting smoking cessation during pregnancy                                           | Coleman, , T, Chamberlain, C, Davey, MA, Cooper, SE; Leonardi-Bee, J                                                                          | 2015 |
| Pet allergen control measures for allergic asthma in children and adults                                                 | Kilburn, , SA, Lasserson, TJ; McKean, MC                                                                                                      | 2001 |
| Postoperative epidural analgesia versus systemic analgesia for thoracolumbar spine surgery in children                   | Guay, , J, Suresh, S, Kopp, S; Johnson, RL                                                                                                    | 2019 |
| Postnatal phenobarbital for the prevention of intraventricular haemorrhage in preterm infants                            | Smit, , E, Odd, D; Whitelaw, A                                                                                                                | 2013 |
| Post-exposure passive immunisation for preventing measles                                                                | Young, , MK, Nimmo, GR, Cripps, AW; Jones, MA                                                                                                 | 2014 |
| Pharmacological treatment for antipsychotic-related constipation                                                         | Every-Palmer, , S, Newton-Howes, G; Clarke, MJ                                                                                                | 2017 |
| Peripheral retinal ablation for threshold retinopathy of prematurity in preterm infants                                  | Andersen, , C; Phelps, D                                                                                                                      | 1999 |
| Platinum-induced hearing loss after treatment for childhood cancer                                                       | van As, , JW, van den Berg, H; van Dalen, EC                                                                                                  | 2016 |
| Pharmacological interventions for the treatment of depression in chronic obstructive pulmonary disease                   | Pollok, , J, van Agteren, JEM; Carson-Chahhoud, KV                                                                                            | 2018 |
| Policies for replacing long-term indwelling urinary catheters in adults                                                  | Cooper, , FPM, Alexander, CE, Sinha, S; Omar, MI                                                                                              | 2016 |
| Pharmacotherapy for mild hypertension                                                                                    | Diao, , D, Wright, JM, Cundiff, DK; Gueyffier, F                                                                                              | 2012 |
| Pharmacotherapy for hyperuricemia in hypertensive patients                                                               | Gois, , PHF; Souza, ERDM                                                                                                                      | 2017 |
| Polyunsaturated fatty acid supplementation in infancy for the prevention of allergy                                      | Schindler, , T, Sinn, JKH; Osborn, DA                                                                                                         | 2016 |
| Piperonyl butoxide (PBO) combined with pyrethroids in insecticide-treated nets to prevent malaria in Africa              | Gleave, , K, Lissenden, N, Richardson, M, Choi, L; Ranson, H                                                                                  | 2018 |
| Pharmaceutical policies: effects of financial incentives for prescribers                                                 | Rashidian, , A, Omidvari, AH, Vali, Y, Sturm, H; Oxman, AD                                                                                    | 2015 |
| Phosphodiesterase 5 inhibitors for pulmonary hypertension                                                                | Barnes, , H, Brown, Z, Burns, A; Williams, T                                                                                                  | 2019 |
| Pharmacological interventions for recurrent abdominal pain in childhood                                                  | Martin, , AE, Newlove-Delgado, TV, Abbott, RA, Bethel, A, Thompson-Coon, J, Whear, R; Logan, S                                                | 2017 |
| Phenobarbital prior to preterm birth for preventing neonatal periventricular haemorrhage                                 | Crowther, , CA; Crosby, DD                                                                                                                    | 2010 |
| Positive end-expiratory pressure for resuscitation of newborn infants at birth                                           | O'Donnell, , CPF, Davis, PG; Morley, CJ                                                                                                       | 2003 |
| Perioperative nutrition interventions for women with ovarian cancer                                                      | Billson, , HA, Holland, C, Curwell, J, Davey, VL, Kinsey, L, Lawton, LJ, Whitworth, AJ; Burden, S                                             | 2013 |
| Positive pressure therapy for M ni re's disease or syndrome                                                              | van Sonsbeek, , S, Pullens, B; van Benthem, PP                                                                                                | 2015 |
| Positional therapy for obstructive sleep apnoea                                                                          | Srijithesh, , PR, Aghoram, R, Goel, A; Dhanya, J                                                                                              | 2019 |
| Polymerase chain reaction blood tests for the diagnosis of invasive aspergillosis in immunocompromised people            | Cruciani, , M, Mengoli, C, Barnes, R, Donnelly, JP, Loeffler, J, Jones, BL, Klingspor, L, Maertens, J, Morton, CO; White, LP                  | 2019 |
| Pharmacological interventions for prevention and treatment of upper gastrointestinal bleeding in newborn infants         | Green, , DS, Abdel-Latif, ME, Jones, LJ, Lui, K; Osborn, DA                                                                                   | 2019 |
| Pharmacotherapies for cannabis dependence                                                                                | Nielsen, , S, Gowing, L, Sabioni, P; Le Foll, B                                                                                               | 2019 |
| Polyunsaturated fatty acids for the primary and secondary prevention of cardiovascular disease                           | Abdelhamid, , AS, Martin, N, Bridges, C, Brainard, JS, Wang, X, Brown, TJ, Hanson, S, Jimoh, OF, Ajabnoor, SM, Deane, KHO, Song, F; Hooper, L | 2018 |

|                                                                                                                                                                                   |                                                                                                                                                |      |
|-----------------------------------------------------------------------------------------------------------------------------------------------------------------------------------|------------------------------------------------------------------------------------------------------------------------------------------------|------|
| Phosphate binders for preventing and treating chronic kidney disease-mineral and bone disorder (CKD-MBD)                                                                          | Ruospo, , M, Palmer, SC, Natale, P, Craig, JC, Vecchio, M, Elder, GJ; Strippoli, GFM                                                           | 2018 |
| Prebiotics for the prevention of hyperbilirubinaemia in neonates                                                                                                                  | Armanian, , AM, Jahanfar, S, Feizi, A, Salehimehr, N, Molaeinezhad, M; Sadeghi, E                                                              | 2019 |
| Pharmaceutical interventions for emotionalism after stroke                                                                                                                        | Allida, , S, Patel, K, House, A; Hackett, ML                                                                                                   | 2019 |
| Psychosocial and psychological interventions for preventing postpartum depression                                                                                                 | Dennis, , CL; Dowswell, T                                                                                                                      | 2013 |
| Resection versus no intervention or other surgical interventions for colorectal cancer liver metastases                                                                           | Fedorowicz, , Z, Lodge, M, Al-asfoor, A; Carter, B                                                                                             | 2008 |
| Rest during pregnancy for preventing pre-eclampsia and its complications in women with normal blood pressure                                                                      | Meher, , S; Duley, L                                                                                                                           | 2006 |
| Rectal 5-aminosalicylic acid for maintenance of remission in ulcerative colitis                                                                                                   | Marshall, , JK, Thabane, M, Steinhart, AH, Newman, JR, Anand, A; Irvine, EJ                                                                    | 2012 |
| Radioiodine treatment for pediatric Graves' disease                                                                                                                               | Ma, , C, Kuang, A, Xie, J; Liu, GJ                                                                                                             | 2008 |
| Rosiglitazone for type 2 diabetes mellitus                                                                                                                                        | Richter, , B, Bandeira-Echtler, E, Bergerhoff, K, Clar, C; Ebrahim, SH                                                                         | 2007 |
| Remote ischaemic preconditioning for coronary artery bypass grafting (with or without valve surgery)                                                                              | Benstoem, , C, Stoppe, C, Liakopoulos, OJ, Ney, J, Hasenclever, D, Meybohm, P; Goetzenich, A                                                   | 2017 |
| Renal denervation for resistant hypertension                                                                                                                                      | Coppolino, , G, Pisano, A, Rivoli, L; Bolignano, D                                                                                             | 2017 |
| Resistance exercise training for fibromyalgia                                                                                                                                     | Busch, , AJ, Webber, SC, Richards, RS, Bidonde, J, Schachter, CL, Schafer, LA, Danyliw, A, Sawant, A, Dal Bello-Haas, V, Rader, T; Overend, TJ | 2013 |
| Rimonabant for overweight or obesity                                                                                                                                              | Curioni, , C; André, C                                                                                                                         | 2006 |
| Rituximab, ofatumumab and other monoclonal anti-CD20 antibodies for chronic lymphocytic leukaemia                                                                                 | Bauer, , K, Rancea, M, Roloff, V, Elter, T, Hallek, M, Engert, A; Skoetz, N                                                                    | 2012 |
| Rectal 5-aminosalicylic acid for induction of remission in ulcerative colitis                                                                                                     | Marshall, , JK, Thabane, M, Steinhart, AH, Newman, JR, Anand, A; Irvine, EJ                                                                    | 2010 |
| Remote and web 2.0 interventions for promoting physical activity                                                                                                                  | Foster, , C, Richards, J, Thorogood, M; Hillsdon, M                                                                                            | 2013 |
| Routine vitamin A supplementation for the prevention of blindness due to measles infection in children                                                                            | Bello, , S, Meremikwu, MM, Ejemot-Nwadiaro, RI; Oduwole, O                                                                                     | 2016 |
| Radiofrequency (thermal) ablation versus no intervention or other interventions for hepatocellular carcinoma                                                                      | Weis, , S, Franke, A, Mössner, J, Jakobsen, JC; Schoppmeyer, K                                                                                 | 2013 |
| Pyridoxine (vitamin B6) supplementation during pregnancy or labour for maternal and neonatal outcomes                                                                             | Salam, , RA, Zuberi, NF; Bhutta, ZA                                                                                                            | 2015 |
| Risk scoring for the primary prevention of cardiovascular disease                                                                                                                 | Karmali, , KN, Persell, SD, Perel, P, Lloyd-Jones, DM, Berendsen, MA; Huffman, MD                                                              | 2017 |
| Remote ischaemic conditioning for preventing and treating ischaemic stroke                                                                                                        | Zhao, , W, Zhang, J, Sadowsky, MG, Meng, R, Ding, Y; Ji, X                                                                                     | 2018 |
| Routine neonatal circumcision for the prevention of urinary tract infections in infancy                                                                                           | Jagannath, , VA, Fedorowicz, Z, Sud, V, Verma, AK; Hajebrahimi, S                                                                              | 2012 |
| Recombinant growth hormone for children and adolescents with Turner syndrome                                                                                                      | Baxter, , L, Bryant, J, Cave, CB; Milne, R                                                                                                     | 2007 |
| Puerarin for ischaemic stroke                                                                                                                                                     | Liu, , B, Tan, Y, Wang, D; Liu, M                                                                                                              | 2016 |
| Radioiodine therapy for differentiated thyroid carcinoma with thyroglobulin positive and radioactive iodine negative metastases                                                   | Ma, , C, Kuang, A; Xie, J                                                                                                                      | 2009 |
| Role of chemotherapy additional to high-dose methotrexate for primary central nervous system lymphoma (PCNSL)                                                                     | Bergner, , N, Monsef, I, Illerhaus, G, Engert, A; Skoetz, N                                                                                    | 2012 |
| Radical multimodality therapy for malignant pleural mesothelioma                                                                                                                  | Abdel-Rahman, , O, Elsayed, Z, Mohamed, H; Eltobgy, M                                                                                          | 2018 |
| Rifamycins (rifampicin, rifabutin and rifapentine) compared to isoniazid for preventing tuberculosis in HIV-negative people at risk of active TB                                  | Sharma, , SK, Sharma, A, Kadhiraan, T; Tharyan, P                                                                                              | 2013 |
| Routine oro/nasopharyngeal suction versus no suction at birth                                                                                                                     | Foster, , JP, Dawson, JA, Davis, PG; Dahlen, HG                                                                                                | 2017 |
| Radiotherapy for diffuse brainstem glioma in children and young adults                                                                                                            | Hu, , X, Fang, Y, Hui, X, Jv, Y; You, C                                                                                                        | 2016 |
| Recombinant human insulin-like growth factor I (rhIGF-I) for the treatment of amyotrophic lateral sclerosis/motor neuron disease                                                  | Beauverd, , M, Mitchell, JD, Wokke, JHJ; Borasio, GD                                                                                           | 2012 |
| Rituximab for thyroid-associated ophthalmopathy                                                                                                                                   | Minakaran, , N; Ezra, DG                                                                                                                       | 2013 |
| Radiotherapy versus open surgery versus endolaryngeal surgery (with or without laser) for early laryngeal squamous cell cancer                                                    | Warner, , L, Chudasama, J, Kelly, CG, Loughran, S, McKenzie, K, Wight, R; Dey, P                                                               | 2014 |
| Rapid diagnostic tests versus clinical diagnosis for managing people with fever in malaria endemic settings                                                                       | Odaga, , J, Sinclair, D, Lokong, JA, Donegan, S, Hopkins, H; Garner, P                                                                         | 2014 |
| Safety of regular formoterol or salmeterol in adults with asthma: an overview of Cochrane reviews                                                                                 | Cates, , CJ, Wieland, LS, Oleszczuk, M; Kew, KM                                                                                                | 2014 |
| Red-light cameras for the prevention of road traffic crashes                                                                                                                      | Aeron-Thomas, , A; Hess, S                                                                                                                     | 2005 |
| Regular treatment with formoterol and an inhaled corticosteroid versus regular treatment with salmeterol and an inhaled corticosteroid for chronic asthma: serious adverse events | Cates, , CJ; Lasserson, TJ                                                                                                                     | 2010 |
| Regular treatment with salmeterol for chronic asthma: serious adverse events                                                                                                      | Cates, , CJ; Cates, MJ                                                                                                                         | 2008 |
| Routine blood cultures in the management of pyelonephritis in pregnancy for improving outcomes                                                                                    | Gomi, , H, Goto, Y, Laopaiboon, M, Usui, R; Mori, R                                                                                            | 2015 |

|                                                                                                                                                                                                                                                             |                                                                                               |      |
|-------------------------------------------------------------------------------------------------------------------------------------------------------------------------------------------------------------------------------------------------------------|-----------------------------------------------------------------------------------------------|------|
| Rapid diagnostic tests for typhoid and paratyphoid (enteric) fever                                                                                                                                                                                          | Wijedoru, , L, Mallett, S; Parry, CM                                                          | 2017 |
| Rubber band ligation versus excisional haemorrhoidectomy for haemorrhoids                                                                                                                                                                                   | Shanmugam, , V, Hakeem, A, Campbell, KL, Rabindranath, KS, Steele, RJC, Thaha, MA; Loudon, MA | 2005 |
| Repeated use of pre- and postcoital hormonal contraception for prevention of pregnancy                                                                                                                                                                      | Halpern, , V, Raymond, EG; Lopez, LM                                                          | 2014 |
| Recombinant growth hormone for idiopathic short stature in children and adolescents                                                                                                                                                                         | Bryant, , J, Baxter, L, Cave, CB; Milne, R                                                    | 2007 |
| Recombinant factor VIIa concentrate versus plasma-derived concentrates for treating acute bleeding episodes in people with haemophilia and inhibitors                                                                                                       | Matino, , D, Makris, M, Dwan, K, D'Amico, R; Iorio, A                                         | 2015 |
| Regular treatment with formoterol versus regular treatment with salmeterol for chronic asthma: serious adverse events                                                                                                                                       | Cates, , CJ; Lasserson, TJ                                                                    | 2012 |
| Relaxation therapies for the management of primary hypertension in adults                                                                                                                                                                                   | Dickinson, , HO, Beyer, FR, Ford, GA, Nicolson, D, Campbell, F, Cook, JV; Mason, J            | 2008 |
| Reminder packaging for improving adherence to self-administered long-term medications                                                                                                                                                                       | Mahtani, , KR, Heneghan, CJ, Glasziou, PP; Perera, R                                          | 2011 |
| Safety of non-steroidal anti-inflammatory drugs, including aspirin and paracetamol (acetaminophen) in people receiving methotrexate for inflammatory arthritis (rheumatoid arthritis, ankylosing spondylitis, psoriatic arthritis, other spondyloarthritis) | Colebatch, , AN, Marks, JL; Edwards, CJ                                                       | 2011 |
| Routine anticonvulsants for treating cerebral malaria                                                                                                                                                                                                       | Meremikwu, , MM; Marson, AG                                                                   | 2002 |
| Risk assessment tools for the prevention of pressure ulcers                                                                                                                                                                                                 | Moore, , ZEH; Patton, D                                                                       | 2019 |
| Recombinant factor VIIa for the prevention and treatment of bleeding in patients without haemophilia                                                                                                                                                        | Simpson, , E, Lin, Y, Stanworth, S, Birchall, J, Doree, C; Hyde, C                            | 2012 |
| Retention procedures for stabilising tooth position after treatment with orthodontic braces                                                                                                                                                                 | Littlewood, , SJ, Millett, DT, Doubleday, B, Bearn, DR; Worthington, HV                       | 2016 |
| Routine drainage for orthotopic liver transplantation                                                                                                                                                                                                       | Gurusamy, , KS, Naik, P; Davidson, BR                                                         | 2011 |
| Respite care for people with dementia and their carers                                                                                                                                                                                                      | Maayan, , N, Soares-Weiser, K; Lee, H                                                         | 2014 |
| Regular treatment with long acting beta agonists versus daily regular treatment with short acting beta agonists in adults and children with stable asthma                                                                                                   | Walters, , EH, Walters, JAE; Gibson, PG                                                       | 2002 |
| Rigid dressings versus soft dressings for transtibial amputations                                                                                                                                                                                           | Kwah, , LK, Webb, MT, Goh, L; Harvey, LA                                                      | 2019 |
| Rivastigmine for vascular cognitive impairment                                                                                                                                                                                                              | Birks, , J, McGuinness, B; Craig, D                                                           | 2013 |
| Route of antibiotic prophylaxis for prevention of cerebrospinal fluid-shunt infection                                                                                                                                                                       | Arts, , SHHMJ, Boogaarts, HD; van Lindert, EJ                                                 | 2019 |
| Psychosocial interventions for benzodiazepine harmful use, abuse or dependence                                                                                                                                                                              | Darker, , CD, Sweeney, BP, Barry, JM, Farrell, MF; Donnelly-Swift, E                          | 2015 |
| Regional analgesia for improvement of long-term functional outcome after elective large joint replacement                                                                                                                                                   | Atchabahian, , A, Schwartz, G, Hall, CB, Lajam, CM; Andreae, MH                               | 2015 |
| Risedronate for the primary and secondary prevention of osteoporotic fractures in postmenopausal women                                                                                                                                                      | Wells, , GA, Cranney, A, Peterson, J, Boucher, M, Shea, B, Welch, V, Coyle, D; Tugwell, P     | 2008 |
| Relaxin for preventing preterm birth                                                                                                                                                                                                                        | Bain, , E, Heatley, E, Hsu, K; Crowther, CA                                                   | 2013 |
| Regional Cerebral Blood Flow Single Photon Emission Computed Tomography for detection of Frontotemporal dementia in people with suspected dementia                                                                                                          | Archer, , HA, Smailagic, N, John, C, Holmes, RB, Takwoingi, Y, Coulthard, EJ; Cullum, S       | 2015 |
| Regular treatment with formoterol for chronic asthma: serious adverse events                                                                                                                                                                                | Cates, , CJ; Cates, MJ                                                                        | 2012 |
| Pyronaridine-artesunate for treating uncomplicated Plasmodium falciparum malaria                                                                                                                                                                            | Pryce, , J, Hine, P                                                                           | 2019 |
| Retinoic acid postconsolidation therapy for high-risk neuroblastoma patients treated with autologous haematopoietic stem cell transplantation                                                                                                               | Peinemann, , F, van Dalen, EC, Enk, H; Berthold, F                                            | 2017 |
| Remediating buildings damaged by dampness and mould for preventing or reducing respiratory tract symptoms, infections and asthma                                                                                                                            | Sauni, , R, Verbeek, JH, Uitti, J, Jauhiainen, M, Kreiss, K; Sigsgaard, T                     | 2015 |
| Restricting oral fluid and food intake during labour                                                                                                                                                                                                        | Singata, , M, Tranmer, J; Gyte, GML                                                           | 2013 |
| Removal of nail polish and finger rings to prevent surgical infection                                                                                                                                                                                       | Arrowsmith, , VA; Taylor, R                                                                   | 2014 |
| QTc interval screening for cardiac risk in methadone treatment of opioid dependence                                                                                                                                                                         | Pani, , PP, Trogu, E, Maremmanni, I; Pacini, M                                                | 2013 |
| Radiotherapy for neovascular age-related macular degeneration                                                                                                                                                                                               | Evans, , JR, Sivagnanavel, V; Chong, V                                                        | 2010 |
| Salbutamol for transient tachypnea of the newborn                                                                                                                                                                                                           | Moresco, , L, Bruschetti, M, Cohen, A, Gaiero, A; Calevo, MG                                  | 2016 |
| Psychosocial and psychological interventions for treating antenatal depression                                                                                                                                                                              | Dennis, , CL, Ross, LE; Grigoriadis, S                                                        | 2007 |
| Psychosocial interventions for supporting women to stop smoking in pregnancy                                                                                                                                                                                | Chamberlain, , C, O'Mara-Eves, A, Porter, J, Coleman, T, Perlen, SM, Thomas, J; McKenzie, JE  | 2017 |
| Repeated lumbar or ventricular punctures in newborns with intraventricular haemorrhage                                                                                                                                                                      | Whitelaw, , A; Lee-Kelland, R                                                                 | 2017 |
| Risk of ovarian cancer in women treated with ovarian stimulating drugs for infertility                                                                                                                                                                      | Rizzuto, , I, Behrens, RF; Smith, LA                                                          | 2019 |

|                                                                                                                                            |                                                                                                                                          |      |
|--------------------------------------------------------------------------------------------------------------------------------------------|------------------------------------------------------------------------------------------------------------------------------------------|------|
| Repeat doses of prenatal corticosteroids for women at risk of preterm birth for improving neonatal health outcomes                         | Crowther, , CA, McKinlay, CJD, Middleton, P; Harding, JE                                                                                 | 2015 |
| Rehabilitation following carpal tunnel release                                                                                             | Peters, , S, Page, MJ, Coppeters, MW, Ross, M; Johnston, V                                                                               | 2016 |
| Rapid initiation of antiretroviral therapy for people living with HIV                                                                      | Mateo-Urdiales, , A, Johnson, S, Smith, R, Nachega, JB; Eshun-Wilson, I                                                                  | 2019 |
| Reminder systems to improve patient adherence to tuberculosis clinic appointments for diagnosis and treatment                              | Liu, , Q, Abba, K, Alejandria, MM, Sinclair, D, Balanag, VM; Lansang, MAD                                                                | 2014 |
| Repetitive task training for improving functional ability after stroke                                                                     | French, , B, Thomas, LH, Coupe, J, McMahon, NE, Connell, L, Harrison, J, Sutton, CJ, Tishkovskaya, S; Watkins, CL                        | 2016 |
| Psychosocial interventions for patients with head and neck cancer                                                                          | Semple, , C, Parahoo, K, Norman, A, McCaughan, E, Humphris, G; Mills, M                                                                  | 2013 |
| Risk-scoring systems for predicting preterm birth with the aim of reducing associated adverse outcomes                                     | Davey, , MA, Watson, L, Rayner, JA; Rowlands, S                                                                                          | 2015 |
| Psychosocial interventions for psychostimulant misuse                                                                                      | Minozzi, , S, Saulle, R, De Crescenzo, F; Amato, L                                                                                       | 2016 |
| Psychostimulants for hypersomnia (excessive daytime sleepiness) in myotonic dystrophy                                                      | Annane, , D, Moore, DH; Miller, RG                                                                                                       | 2006 |
| Reduction in saturated fat intake for cardiovascular disease                                                                               | Hooper, , L, Martin, N, Abdelhamid, A; Davey Smith, G                                                                                    | 2015 |
| Recombinant human activated protein C for severe sepsis in neonates                                                                        | Kylat, , RI; Ohlsson, A                                                                                                                  | 2012 |
| Regular long-term red blood cell transfusions for managing chronic chest complications in sickle cell disease                              | Estcourt, , LJ, Fortin, PM, Hopewell, S, Trivella, M, Hambleton, IR; Cho, G                                                              | 2016 |
| Radiofrequency ablation in the treatment of liver metastases from colorectal cancer                                                        | Ciocchi, , R, Trastulli, S, Boselli, C, Montedori, A, Cavaliere, D, Parisi, A, Noya, G; Abbra, I                                         | 2012 |
| Quinolones for uncomplicated acute cystitis in women                                                                                       | Rafalsky, , VV, Andreeva, IV; Rjabkova, EL                                                                                               | 2006 |
| Routine intraoperative ureteric stenting for kidney transplant recipients                                                                  | Wilson, , CH, Rix, DA; Manas, DM                                                                                                         | 2013 |
| Psychosocial interventions to improve quality of life and emotional wellbeing for recently diagnosed cancer patients                       | Galway, , K, Black, A, Cantwell, M, Cardwell, CR, Mills, M; Donnelly, M                                                                  | 2012 |
| Reiki for depression and anxiety                                                                                                           | Joyce, , J; Herbison, GP                                                                                                                 | 2015 |
| Pulmonary rehabilitation for interstitial lung disease                                                                                     | Dowman, , L, Hill, CJ; Holland, AE                                                                                                       | 2014 |
| Reduced or modified dietary fat for preventing cardiovascular disease                                                                      | Hooper, , L, Summerbell, CD, Thompson, R, Sills, D, Roberts, FG, Moore, HJ; Davey Smith, G                                               | 2012 |
| Repetitive transcranial magnetic stimulation for improving function after stroke                                                           | Hao, , Z, Wang, D, Zeng, Y; Liu, M                                                                                                       | 2013 |
| Radical prostatectomy versus watchful waiting for prostate cancer                                                                          | Hegarty, , J, Beirne, PV, Walsh, E, Comber, H, Fitzgerald, T; Wallace Kazer, M                                                           | 2010 |
| Psychosocial interventions for depression in dialysis patients                                                                             | Rabindranath, , KS, Daly, C, Butler, J, Roderick, PJ, Wallace, SA; MacLeod, AM                                                           | 2005 |
| Recombinant growth hormone therapy for X-linked hypophosphatemia in children                                                               | Yang, , HM, Mao, M, Yang, F; Wan, C                                                                                                      | 2005 |
| Risk of endometrial cancer in women treated with ovary-stimulating drugs for subfertility                                                  | Skalkidou, , A, Sergeantanis, TN, Gialamas, SP, Georgakis, MK, Psaltopoulou, T, Trivella, M, Siristatidis, CS, Evangelou, E; Petridou, E | 2017 |
| Red cell transfusion for the management of upper gastrointestinal haemorrhage                                                              | Jairath, , V, Hearnshaw, S, Brunskill, SJ, Doree, C, Hopewell, S, Hyde, C, Travis, S; Murphy, MF                                         | 2010 |
| Routine versus selective antifungal administration for control of fungal infections in patients with cancer                                | Göttsche, , PC; Johansen, HK                                                                                                             | 2014 |
| Pulmonary artery perfusion versus no perfusion during cardiopulmonary bypass for open heart surgery in adults                              | Buggeskov, , KB, Grønlykke, L, Risom, EC, Wei, ML; Wetterslev, J                                                                         | 2018 |
| Pycnogenol® (extract of French maritime pine bark) for the treatment of chronic disorders                                                  | Schoonees, , A, Visser, J, Musekiwa, A; Volmink, J                                                                                       | 2012 |
| Radiotherapy for malignant pleural mesothelioma                                                                                            | Chapman, , E; García Diéguez, M                                                                                                          | 2006 |
| Rehabilitation after lumbar disc surgery                                                                                                   | Oosterhuis, , T, Costa, LOP, Maher, CG, de Vet, HCW, van Tulder, MW; Ostelo, RWJG                                                        | 2014 |
| Repetitive transcranial magnetic stimulation for the treatment of amyotrophic lateral sclerosis or motor neuron disease                    | Fang, , J, Zhou, M, Yang, M, Zhu, C; He, L                                                                                               | 2013 |
| Red cell transfusion management for patients undergoing cardiac surgery for congenital heart disease                                       | Wilkinson, , KL, Brunskill, SJ, Doree, C, Trivella, M, Gill, R; Murphy, MF                                                               | 2014 |
| Rituximab for eradicating inhibitors in people with acquired haemophilia A                                                                 | Zeng, , Y, Zhou, R, Duan, X; Long, D                                                                                                     | 2016 |
| Psychosocial interventions for premature ejaculation                                                                                       | Melnik, , T, Althof, S, Atallah, AN, Puga, MEDS, Glina, S; Riera, R                                                                      | 2011 |
| Repositioning for treating pressure ulcers                                                                                                 | Moore, , ZEH; Cowman, S                                                                                                                  | 2015 |
| Pulmonary rehabilitation following exacerbations of chronic obstructive pulmonary disease                                                  | Puhan, , MA, Gimeno-Santos, E, Cates, CJ; Troosters, T                                                                                   | 2016 |
| Restricted versus liberal water intake for preventing morbidity and mortality in preterm infants                                           | Bell, , EF; Acarregui, MJ                                                                                                                | 2014 |
| Radiotherapy and chemoradiation after surgery for early cervical cancer                                                                    | Rogers, , L, Siu, SSN, Luesley, D, Bryant, A; Dickinson, HO                                                                              | 2012 |
| Recombinant human erythropoietin versus placebo or no treatment for the anaemia of chronic kidney disease in people not requiring dialysis | Cody, , JD; Hodson, EM                                                                                                                   | 2016 |

|                                                                                                                                                  |                                                                                                                              |      |
|--------------------------------------------------------------------------------------------------------------------------------------------------|------------------------------------------------------------------------------------------------------------------------------|------|
| Repetitive transcranial magnetic stimulation for tinnitus                                                                                        | Meng, , Z, Liu, S, Zheng, Y; Phillips, JS                                                                                    | 2011 |
| Rapid tests for the diagnosis of visceral leishmaniasis in patients with suspected disease                                                       | Boelaert, , M, Verdonck, K, Menten, J, Sunyoto, T, van Griensven, J, Chappuis, F; Rijal, S                                   | 2014 |
| Pulsatile gonadotrophin releasing hormone for ovulation induction in subfertility associated with polycystic ovary syndrome                      | Bayram, , N, van Wely, M; Van der Veen, F                                                                                    | 2003 |
| Quit and Win contests for smoking cessation                                                                                                      | Cahill, , K; Perera, R                                                                                                       | 2008 |
| Rituximab for relapsing-remitting multiple sclerosis                                                                                             | He, , D, Guo, R, Zhang, F, Zhang, C, Dong, S; Zhou, H                                                                        | 2013 |
| Restricting or banning alcohol advertising to reduce alcohol consumption in adults and adolescents                                               | Siegfried, , N, Pienaar, DC, Ataguba, JE, Volmink, J, Kredon, T, Jere, M; Parry, CDH                                         | 2014 |
| Retinoids for preventing the progression of cervical intra-epithelial neoplasia                                                                  | Helm, , CW, Lorenz, DJ, Meyer, NJ, Rising, WWR; Wulff, JL                                                                    | 2013 |
| Punctal occlusion for dry eye syndrome                                                                                                           | Ervin, , AM, Law, A; Pucker, AD                                                                                              | 2017 |
| Purine Antagonists for Chronic Lymphocytic Leukaemia                                                                                             | Steurer, , M, Pall, G, Richards, S, Schwarzer, G, Bohlius, J; Greil, R                                                       | 2006 |
| Relaxation for perimenopausal and postmenopausal symptoms                                                                                        | Saensak, , S, Vutyavanich, T, Somboonporn, W; Srisurapanont, M                                                               | 2014 |
| Respiratory function monitoring to reduce mortality and morbidity in newborn infants receiving resuscitation                                     | Schmölzer, , GM, Morley, CJ; Davis, PG                                                                                       | 2010 |
| Regional (spinal, epidural, caudal) versus general anaesthesia in preterm infants undergoing inguinal herniorrhaphy in early infancy             | Jones, , LJ, Craven, PD, Lakkundi, A, Foster, JP; Badawi, N                                                                  | 2015 |
| Ribavirin plus interferon versus interferon for chronic hepatitis C                                                                              | Brok, , J, Gluud, LL; Gluud, C                                                                                               | 2010 |
| Routine or selective carotid artery shunting for carotid endarterectomy (and different methods of monitoring in selective shunting)              | Chongruksut, , W, Vaniyapong, T; Rerkasem, K                                                                                 | 2014 |
| Restriction of salt, caffeine and alcohol intake for the treatment of Ménière's disease or syndrome                                              | Hussain, , K, Murdin, L; Schilder, AGM                                                                                       | 2018 |
| Radix Sophorae flavescentis versus other drugs or herbs for chronic hepatitis B                                                                  | Liang, , N, Kong, DZ, Lu, CL, Ma, SS, Li, YQ, Nikolova, D, Jakobsen, JC, Gluud, C; Liu, JP                                   | 2019 |
| Robotic versus open radical cystectomy for bladder cancer in adults                                                                              | Rai, , BP, Bondad, J, Vasdev, N, Adshead, J, Lane, T, Ahmed, K, Khan, MS, Dasgupta, P, Guru, K, Chlosta, PL; Aboumarzouk, OM | 2019 |
| Routine monitoring of gastric residual for prevention of necrotising enterocolitis in preterm infants                                            | Abiramalatha, , T, Thanigainathan, S; Ninan, B                                                                               | 2019 |
| Psychosocial interventions for recurrent abdominal pain in childhood                                                                             | Abbott, , RA, Martin, AE, Newlove-Delgado, TV, Bethel, A, Thompson-Coon, J, Whear, R; Logan, S                               | 2017 |
| Safety of topical corticosteroids in pregnancy                                                                                                   | Chi, , CC, Wang, SH, Wojnarowska, F, Kirtschig, G, Davies, E; Bennett, C                                                     | 2015 |
| Risperidone dose for schizophrenia                                                                                                               | Li, , C, Xia, J; Wang, J                                                                                                     | 2009 |
| Rosuvastatin for lowering lipids                                                                                                                 | Adams, , SP, Sekhon, SS; Wright, JM                                                                                          | 2014 |
| Riluzole for amyotrophic lateral sclerosis (ALS)/motor neuron disease (MND)                                                                      | Miller, , RG, Mitchell, JD; Moore, DH                                                                                        | 2012 |
| Respiratory muscle training for cystic fibrosis                                                                                                  | Hilton, , N; Solis-Moya, A                                                                                                   | 2018 |
| Quality of life after rectal resection for cancer, with or without permanent colostomy.                                                          | Pachler, , J; Wille-Jørgensen, P                                                                                             | 2012 |
| Routine invasive strategies versus selective invasive strategies for unstable angina and non-ST elevation myocardial infarction in the stent era | Fanning, , JP, Nyong, J, Scott, IA, Aroney, CN; Walters, DL                                                                  | 2016 |
| Psychosocial interventions for reducing antipsychotic medication in care home residents                                                          | Richter, , T, Meyer, G, Möhler, R; Köpke, S                                                                                  | 2012 |
| Ribavirin for treating Crimean Congo haemorrhagic fever                                                                                          | Johnson, , S, Henschke, N, Maayan, N, Mills, I, Buckley, BS, Kakourou, A; Marshall, R                                        | 2018 |
| Respiratory muscle training for cervical spinal cord injury                                                                                      | Berlowitz, , DJ; Tamplin, J                                                                                                  | 2013 |
| Regional versus general anaesthesia for caesarean section                                                                                        | Afolabi, , BB; Lesi, FEA                                                                                                     | 2012 |
| Recall intervals for oral health in primary care patients                                                                                        | Riley, , P, Worthington, HV, Clarkson, JE; Beirne, PV                                                                        | 2013 |
| Red blood cell transfusion for people undergoing hip fracture surgery                                                                            | Brunskill, , SJ, Millette, SL, Shokoohi, A, Pulford, EC, Doree, C, Murphy, MF; Stanworth, S                                  | 2015 |
| Red flags to screen for vertebral fracture in patients presenting with low-back pain                                                             | Williams, , CM, Henschke, N, Maher, CG, van Tulder, MW, Koes, BW, Macaskill, P; Irwig, L                                     | 2013 |
| Recompression and adjunctive therapy for decompression illness                                                                                   | Bennett, , MH, Lehm, JP, Mitchell, SJ; Wasiak, J                                                                             | 2012 |
| Pulp treatment for extensive decay in primary teeth                                                                                              | Smail-Faugeron, , V, Glennly, AM, Courson, F, Durieux, P, Muller-Bolla, M; Fron Chabouis, H                                  | 2018 |
| Recombinant interferon beta or glatiramer acetate for delaying conversion of the first demyelinating event to multiple sclerosis                 | Clerico, , M, Faggiano, F, Palace, J, Rice, GPA, Tintorè Subirana, M; Durelli, L                                             | 2008 |
| Psychosocial interventions for reducing injection and sexual risk behaviour for preventing HIV in drug users                                     | Meador, , N, Li, R, Des Jarlais, DC; Pilling, S                                                                              | 2010 |
| Rheum officinale (a traditional Chinese medicine) for chronic kidney disease                                                                     | Wang, , H, Song, H, Yue, J, Li, J, Hou, YB; Deng, JL                                                                         | 2012 |
| Rapid COJEC versus standard induction therapies for high-risk neuroblastoma                                                                      | Peinemann, , F, Kahangire, DA, van Dalen, EC; Berthold, F                                                                    | 2015 |



|                                                                                                                                                        |                                                                                                                                                    |      |
|--------------------------------------------------------------------------------------------------------------------------------------------------------|----------------------------------------------------------------------------------------------------------------------------------------------------|------|
| Risk of fatal and nonfatal lactic acidosis with metformin use in type 2 diabetes mellitus                                                              | Salpeter, , SR, Greyber, E, Pasternak, GA; Salpeter, EE                                                                                            | 2010 |
| Re-feeding versus discarding gastric residuals to improve growth in preterm infants                                                                    | Abiramalatha, , T, Thanigainathan, S; Balakrishnan, U                                                                                              | 2019 |
| Robot-assisted surgery in gynaecology                                                                                                                  | Lawrie, , TA, Liu, H, Lu, D, Dowswell, T, Song, H, Wang, L; Shi, G                                                                                 | 2019 |
| Rehabilitation for people with multiple sclerosis: an overview of Cochrane Reviews                                                                     | Amatya, , B, Khan, F; Galea, M                                                                                                                     | 2019 |
| Risk-reducing medications for primary breast cancer: a network meta-analysis                                                                           | Mocellin, , S, Goodwin, A; Pasquali, S                                                                                                             | 2019 |
| Risk-reducing mastectomy for the prevention of primary breast cancer                                                                                   | Carbine, , NE, Lostumbo, L, Wallace, J; Ko, H                                                                                                      | 2018 |
| Reading aids for adults with low vision                                                                                                                | Virgili, , G, Acosta, R, Bentley, SA, Giacomelli, G, Allcock, C; Evans, JR                                                                         | 2018 |
| Risperidone versus olanzapine for schizophrenia                                                                                                        | Jayaram, , MB, Hosalli, P; Stroup, TS                                                                                                              | 2006 |
| Risperidone for attention-deficit hyperactivity disorder in people with intellectual disabilities                                                      | Thomson, , A, Maltezos, S, Paliokosta, E; Xenitidis, K                                                                                             | 2009 |
| Rapamycin and rapalogs for tuberous sclerosis complex                                                                                                  | Sasongko, , TH, Ismail, NFD; Zabidi-Hussin, ZAMH                                                                                                   | 2016 |
| Reduction of the number of fetuses for women with a multiple pregnancy                                                                                 | Dodd, , JM, Dowswell, T; Crowther, CA                                                                                                              | 2015 |
| Rofecoxib for rheumatoid arthritis                                                                                                                     | Garner, , SE, Fidan, D, Frankish, RR, Judd, M, Towheed, T, Tugwell, P; Wells, GA                                                                   | 2005 |
| Psychosocial interventions for cannabis use disorder                                                                                                   | Gates, , PJ, Sabioni, P, Copeland, J, Le Foll, B; Gowing, L                                                                                        | 2016 |
| Recombinant human interleukin 10 for induction of remission in Crohn's disease                                                                         | Buruiana, , FE, Solà, I; Alonso-Coello, P                                                                                                          | 2010 |
| Rivastigmine for Alzheimer's disease                                                                                                                   | Birks, , JS, Chong, LY; Grimley Evans, J                                                                                                           | 2015 |
| Rehabilitation for improving automobile driving after stroke                                                                                           | George, , S, Crotty, M, Gelinas, I; Devos, H                                                                                                       | 2014 |
| Remote ischaemic preconditioning versus no remote ischaemic preconditioning for vascular and endovascular surgical procedures                          | Desai, , M, Gurusamy, KS, Ghanbari, H, Hamilton, G; Seifalian, AM                                                                                  | 2011 |
| Reminder systems for women with previous gestational diabetes mellitus to increase uptake of testing for type 2 diabetes or impaired glucose tolerance | Middleton, , P; Crowther, CA                                                                                                                       | 2014 |
| Rofecoxib for osteoarthritis                                                                                                                           | Garner, , SE, Fidan, D, Frankish, RR; Maxwell, L                                                                                                   | 2005 |
| Routine preoperative medical testing for cataract surgery                                                                                              | Keay, , L, Lindsley, K, Tielsch, J, Katz, J; Schein, O                                                                                             | 2019 |
| Rituximab for treating inhibitors in people with inherited severe hemophilia                                                                           | Jiang, , L, Liu, Y, Zhang, L, Santoro, C; Rodriguez, A                                                                                             | 2017 |
| Psychosocial interventions for men with prostate cancer                                                                                                | Parahoo, , K, McDonough, S, McCaughan, E, Noyes, J, Semple, C, Halstead, EJ, Neuberger, MM; Dahm, P                                                | 2013 |
| Resection versus other treatments for locally advanced pancreatic cancer                                                                               | Gurusamy, , KS, Kumar, S, Davidson, BR; Fusai, G                                                                                                   | 2014 |
| Rituximab for rheumatoid arthritis                                                                                                                     | Lopez-Olivo, , MA, Amezcua Urruela, M, McGahan, L, Pollono, EN; Suarez-Almazor, ME                                                                 | 2015 |
| Recombinant growth hormone therapy for cystic fibrosis in children and young adults                                                                    | Thaker, , V, Carter, B; Putman, M                                                                                                                  | 2018 |
| Public stewardship of private for-profit healthcare providers in low- and middle-income countries                                                      | Wiysonge, , CS, Abdullahi, LH, Ndze, VN; Hussey, GD                                                                                                | 2016 |
| Psychosocial interventions for fatigue during cancer treatment with palliative intent                                                                  | Poort, , H, Peters, M, Bleijenberg, G, Gielissen, MFM, Goedendorp, MM, Jacobsen, P, Verhagen, S; Knoop, H                                          | 2017 |
| Psychotropic analgesic nitrous oxide for alcoholic withdrawal states                                                                                   | Gillman, , MA, Lichtigfeld, F; Young, T                                                                                                            | 2007 |
| Red flags to screen for malignancy in patients with low-back pain                                                                                      | Henschke, , N, Maher, CG, Ostelo, RWJG, de Vet, HCW, Macaskill, P; Irwig, L                                                                        | 2013 |
| Psychosocial interventions to reduce alcohol consumption in concurrent problem alcohol and illicit drug users                                          | Klimas, , J, Fairgrieve, C, Tobin, H, Field, CA, O'Gorman, CSM, Glynn, LG, Keenan, E, Saunders, J, Bury, G, Dunne, C; Cullen, W                    | 2018 |
| Respiratory muscle training for multiple sclerosis                                                                                                     | Rietberg, , MB, Veerbeek, JM, Gosselink, R, Kwakkel, G; van Wegen, EEH                                                                             | 2017 |
| Relapse prevention interventions for smoking cessation                                                                                                 | Livingstone-Banks, , J, Norris, E, Hartmann-Boyce, J, West, R, Jarvis, M; Hajek, P                                                                 | 2019 |
| Salicylate for the treatment of Kawasaki disease in children                                                                                           | Baumer, , JH, Love, S, Gupta, A, Haines, L, Maconochie, IK; Dua, JS                                                                                | 2006 |
| Reflectance confocal microscopy for diagnosing cutaneous melanoma in adults                                                                            | Dimnes, , J, Deeks, JJ, Saleh, D, Chuchu, N, Bayliss, SE, Patel, L, Davenport, C, Takwoingi, Y, Godfrey, K, Matin, RN, Patalay, R; Williams, HC    | 2018 |
| Reflectance confocal microscopy for diagnosing keratinocyte skin cancers in adults                                                                     | Dimnes, , J, Deeks, JJ, Chuchu, N, Saleh, D, Bayliss, SE, Takwoingi, Y, Davenport, C, Patel, L, Matin, RN, O'Sullivan, C, Patalay, R; Williams, HC | 2018 |
| Radix Sophorae flavescentis versus no intervention or placebo for chronic hepatitis B                                                                  | Liang, , N, Kong, DZ, Ma, SS, Lu, CL, Yang, M, Feng, LD, Shen, C, Diaoy, RH, Cui, LJ, Lu, XY, Nikolova, D, Jakobsen, JC, Gluud, C; Liu, JP         | 2019 |
| Supervised dosing with a long-acting opioid medication in the management of opioid dependence                                                          | Saulle, , R, Vecchi, S; Gowing, L                                                                                                                  | 2017 |
| Stem cell transplantation for ischemic stroke                                                                                                          | Boncoraglio, , GB, Ranieri, M, Bersano, A, Parati, EA; Del Giovane, C                                                                              | 2019 |

|                                                                                                                                                                  |                                                                                                                                                                                                                                 |      |
|------------------------------------------------------------------------------------------------------------------------------------------------------------------|---------------------------------------------------------------------------------------------------------------------------------------------------------------------------------------------------------------------------------|------|
| Statins for primary prevention of venous thromboembolism                                                                                                         | Li, , L, Zhang, P, Tian, JH; Yang, K                                                                                                                                                                                            | 2014 |
| Tacrolimus versus cyclosporin as primary immunosuppression for lung transplant recipients                                                                        | Penninga, , L, Penninga, EI, Möller, CH, Iversen, M, Steinbrüchel, DA; Gluud, C                                                                                                                                                 | 2013 |
| Steroidal contraceptives: effect on bone fractures in women                                                                                                      | Lopez, , LM, Grimes, DA, Schulz, KF, Curtis, KM; Chen, M                                                                                                                                                                        | 2014 |
| Statins for women with polycystic ovary syndrome not actively trying to conceive                                                                                 | Raval, , AD, Hunter, T, Stuckey, B; Hart, RJ                                                                                                                                                                                    | 2011 |
| Surgical techniques for uterine incision and uterine closure at the time of caesarean section                                                                    | Dodd, , JM, Anderson, ER, Gates, S; Grivell, RM                                                                                                                                                                                 | 2014 |
| Surgical decompression for cerebral oedema in acute ischaemic stroke                                                                                             | Cruz-Flores, , S, Berge, E; Whittle, IR                                                                                                                                                                                         | 2012 |
| Steroids for traumatic optic neuropathy                                                                                                                          | Yu-Wai-Man, , P; Griffiths, PG                                                                                                                                                                                                  | 2013 |
| Surgery for faecal incontinence in adults                                                                                                                        | Brown, , SR, Wadhawan, H; Nelson, RL                                                                                                                                                                                            | 2013 |
| Support during pregnancy for women at increased risk of low birthweight babies                                                                                   | East, , CE, Biro, MA, Fredericks, S; Lau, R                                                                                                                                                                                     | 2019 |
| Supplementation with multiple micronutrients for breastfeeding women for improving outcomes for the mother and baby                                              | Abe, , SK, Balogun, OO, Ota, E, Takahashi, K; Mori, R                                                                                                                                                                           | 2016 |
| Surgical hand antisepsis to reduce surgical site infection                                                                                                       | Tanner, , J, Dumville, JC, Norman, G; Fortnam, M                                                                                                                                                                                | 2016 |
| Stent placement versus surgery for coarctation of the thoracic aorta                                                                                             | Pádua, , LMS, Garcia, LC, Rubira, CJ; de Oliveira Carvalho, PE                                                                                                                                                                  | 2012 |
| Surgery for obstructive sleep apnoea in adults                                                                                                                   | Sundaram, , S, Lim, J; Lasserson, TJ                                                                                                                                                                                            | 2005 |
| Support for healthy breastfeeding mothers with healthy term babies                                                                                               | McFadden, , A, Gavine, A, Renfrew, MJ, Wade, A, Buchanan, P, Taylor, JL, Veitch, E, Rennie, AM, Crowther, SA, Neiman, S; MacGillivray, S                                                                                        | 2017 |
| Structured telephone support or non-invasive telemonitoring for patients with heart failure                                                                      | Inglis, , SC, Clark, RA, Dierckx, R, Prieto-Merino, D; Cleland, JGF                                                                                                                                                             | 2015 |
| Surgery for lateral elbow pain                                                                                                                                   | Buchbinder, , R, Johnston, RV, Barnsley, L, Assendelft, WJJ, Bell, SN; Smidt, N                                                                                                                                                 | 2011 |
| Tai chi for primary prevention of cardiovascular disease                                                                                                         | Hartley, , L, Flowers, N, Lee, MS, Ernst, E; Rees, K                                                                                                                                                                            | 2014 |
| Strategies for the discontinuation of humidified high flow nasal cannula (HHFNC) in preterm infants                                                              | Farley, , RC, Hough, JL; Jardine, LA                                                                                                                                                                                            | 2015 |
| Surgery for limited-stage small-cell lung cancer                                                                                                                 | Barnes, , H, See, K, Barnett, S; Manser, R                                                                                                                                                                                      | 2017 |
| Sweet potato for type 2 diabetes mellitus                                                                                                                        | Ooi, , CP; Loke, SC                                                                                                                                                                                                             | 2013 |
| Tai chi for treating rheumatoid arthritis                                                                                                                        | Han, , A, Judd, M, Welch, V, Wu, T, Tugwell, P; Wells, GA                                                                                                                                                                       | 2004 |
| Surgical management for upper urinary tract transitional cell carcinoma                                                                                          | Rai, , BP, Shelley, M, Coles, B, Biyani, CS, El-Mokadem, I; Nabi, G                                                                                                                                                             | 2011 |
| Surgery versus radiosurgery for patients with a solitary brain metastasis from non-small cell lung cancer                                                        | Fuentes, , R, Bonfill Cosp, X; Expósito Hernandez, J                                                                                                                                                                            | 2006 |
| Supraglottic airway devices versus tracheal intubation for airway management during general anaesthesia in obese patients                                        | Nicholson, , A, Cook, TM, Smith, AF, Lewis, SR; Reed, SS                                                                                                                                                                        | 2013 |
| Tacrolimus (FK506) for induction of remission in refractory ulcerative colitis                                                                                   | Baumgart, , DC, MacDonald, JK; Feagan, B                                                                                                                                                                                        | 2008 |
| Structured treatment interruptions (STI) in chronic unsuppressed HIV infection in adults                                                                         | Pant Pai, , N, Lawrence, J, Reingold, AL; Tulskey, JP                                                                                                                                                                           | 2006 |
| Statins for the prevention of dementia                                                                                                                           | McGuinness, , B, Craig, D, Bullock, R; Passmore, P                                                                                                                                                                              | 2016 |
| Stepping down the dose of inhaled corticosteroids for adults with asthma                                                                                         | Crossingham, , I, Evans, DJW, Halcovitch, NR; Marsden, PA                                                                                                                                                                       | 2017 |
| Strategies of testing for syphilis during pregnancy                                                                                                              | Shahrook, , S, Mori, R, Ochirbat, T; Gomi, H                                                                                                                                                                                    | 2014 |
| Steroid avoidance or withdrawal for pancreas and pancreas with kidney transplant recipients                                                                      | Montero, , N, Webster, AC, Royuela, A, Zamora, J, Crespo Barrio, M; Pascual, J                                                                                                                                                  | 2014 |
| Strategies for detecting colon cancer in patients with inflammatory bowel disease                                                                                | Bye, , WA, Nguyen, TM, Parker, CE, Jairath, V; East, JE                                                                                                                                                                         | 2017 |
| Symptomatic treatment of the cough in whooping cough                                                                                                             | Wang, , K, Bettiol, S, Thompson, MJ, Roberts, NW, Perera, R, Heneghan, CJ; Harnden, A                                                                                                                                           | 2014 |
| Systemic corticosteroids for acute gout                                                                                                                          | Janssens, , HJ, Lucassen, PLBJ, Van de Laar, FA, Janssen, M; Van de Lisdonk, EH                                                                                                                                                 | 2008 |
| Systemic pharmacological treatments for chronic plaque psoriasis: a network meta-analysis                                                                        | Sbidian, , E, Chaimani, A, Garcia-Doval, I, Do, G, Hua, C, Mazaud, C, Droitcourt, C, Hughes, C, Ingram, JR, Naldi, L, Chosidow, O; Le Cleach, L                                                                                 | 2017 |
| Subconjunctival draining minimally-invasive glaucoma devices for medically uncontrolled glaucoma                                                                 | King, , AJ, Shah, A, Nikita, E, Hu, K, Mulvaney, CA, Stead, R; Azuara-Blanco, A                                                                                                                                                 | 2018 |
| Strategies to improve the implementation of healthy eating, physical activity and obesity prevention policies, practices or programmes within childcare services | Wolfenden, , L, Jones, J, Williams, CM, Finch, M, Wyse, RJ, Kingsland, M, Tzelepis, F, Wiggers, J, Williams, AJ, Seward, K, Small, T, Welch, V, Booth, D; Yoong, SL                                                             | 2016 |
| Strategies for enhancing the implementation of school-based policies or practices targeting risk factors for chronic disease                                     | Wolfenden, , L, Nathan, NK, Sutherland, R, Yoong, SL, Hodder, RK, Wyse, RJ, Delaney, T, Grady, A, Fielding, A, Tzelepis, F, Clinton-McHarg, T, Parmenter, B, Butler, P, Wiggers, J, Bauman, A, Milat, A, Booth, D; Williams, CM | 2017 |
| Systemic prokinetic pharmacologic treatment for postoperative adynamic ileus following abdominal surgery in adults                                               | Traut, , U, Brügger, L, Kunz, R, Pauli-Magnus, C, Haug, K, Bucher, H; Koller, MT                                                                                                                                                | 2008 |

|                                                                                                                                                |                                                                                                                                                |      |
|------------------------------------------------------------------------------------------------------------------------------------------------|------------------------------------------------------------------------------------------------------------------------------------------------|------|
| Surgical cytoreduction for recurrent epithelial ovarian cancer                                                                                 | Al Rawahi, , T, Lopes, AD, Bristow, RE, Bryant, A, Elattar, A, Chattopadhyay, S; Galaal, K                                                     | 2013 |
| Surgical interventions for pharyngeal pouch                                                                                                    | Sen, , P, Lowe, DA; Farnan, T                                                                                                                  | 2005 |
| Steroid hormones for contraception in women with sickle cell disease                                                                           | Manchikanti Gomez, , A, Grimes, DA, Lopez, LM; Schulz, KF                                                                                      | 2007 |
| Systemic corticosteroids for acute otitis media in children                                                                                    | Ranakusuma, , RW, Pitoyo, Y, Safitri, ED, Thorning, S, Beller, EM, Sastroasmoro, S; Del Mar, CB                                                | 2018 |
| Steroidal contraceptives: effect on carbohydrate metabolism in women without diabetes mellitus                                                 | Lopez, , LM, Grimes, DA; Schulz, KF                                                                                                            | 2014 |
| Strategies for the withdrawal of nasal continuous positive airway pressure (NCPAP) in preterm infants                                          | Jardine, , LA, Inglis, GDT; Davies, MW                                                                                                         | 2011 |
| Surgical excision margins for primary cutaneous melanoma                                                                                       | Sladden, , MJ, Balch, C, Barzilai, DA, Berg, D, Freiman, A, Handiside, T, Hollis, S, Lens, MB; Thompson, JF                                    | 2009 |
| Supplementary vitamin E, selenium, cysteine and riboflavin for preventing kwashiorkor in preschool children in developing countries            | Odigwe, , CC, Smedslund, G, Ejemot-Nwadiaro, RI, Anyanechi, CC; Krawinkel, MB                                                                  | 2010 |
| Stretching to prevent or reduce muscle soreness after exercise                                                                                 | Herbert, , RD, de Noronha, M; Kamper, SJ                                                                                                       | 2011 |
| Surgery for tympanic membrane retraction pockets                                                                                               | Nankivell, , PC; Pothier, DD                                                                                                                   | 2010 |
| Surgical versus conservative treatment for acute injuries of the lateral ligament complex of the ankle in adults                               | Kerkhoffs, , GMMJ, Handoll, HHG, de Bie, R, Rowe, BH; Struijs, PAA                                                                             | 2007 |
| Sumatriptan (oral route of administration) for acute migraine attacks in adults                                                                | Derry, , CJ, Derry, S; Moore, RA                                                                                                               | 2012 |
| Strategies to increase the ownership and use of insecticide-treated bednets to prevent malaria                                                 | Augustincic Polec, , L, Petkovic, J, Welch, V, Ueffing, E, Tanjong Ghogomu, E, Pardo Pardo, J, Grabowsky, M, Attaran, A, Wells, GA; Tugwell, P | 2015 |
| Supportive care for patients with gastrointestinal cancer                                                                                      | Ahmed, , N, Ahmedzai, S, Vora, V, Harrison, S; Paz, S                                                                                          | 2004 |
| Steroid-eluting sinus stents for improving symptoms in chronic rhinosinusitis patients undergoing functional endoscopic sinus surgery          | Huang, , Z, Hwang, P, Sun, Y; Zhou, B                                                                                                          | 2015 |
| Sublingual immunotherapy for allergic rhinitis                                                                                                 | Radulovic, , S, Calderon, MA, Wilson, D; Durham, S                                                                                             | 2010 |
| Systemic treatments for metastatic cutaneous melanoma                                                                                          | Pasquali, , S, Hadjinicolaou, AV, Chiarion Sileni, V, Rossi, CR; Mocellin, S                                                                   | 2018 |
| Submacular surgery for choroidal neovascularisation secondary to age-related macular degeneration                                              | Giansanti, , F, Eandi, CM; Virgili, G                                                                                                          | 2009 |
| Steroid therapy for meconium aspiration syndrome in newborn infants                                                                            | Ward, , MC; Sinn, JKH                                                                                                                          | 2003 |
| Statins for multiple sclerosis                                                                                                                 | Wang, , J, Xiao, Y, Luo, M; Luo, H                                                                                                             | 2011 |
| Systematic screening and assessment of psychosocial well-being and care needs of people with cancer                                            | Schouten, , B, Avau, B, Bekkering, GTRUDYE, Vankrunkelsven, P, Mebis, J, Hellings, J; Van Hecke, A                                             | 2019 |
| Surgery for cervical intraepithelial neoplasia                                                                                                 | Martin-Hirsch, , PPL, Paraskevaidis, E, Bryant, A; Dickinson, HO                                                                               | 2013 |
| Surgical versus non-surgical interventions for vocal cord nodules                                                                              | Pedersen, , M; McGlashan, J                                                                                                                    | 2012 |
| Sulpiride augmentation for schizophrenia                                                                                                       | Wang, , J, Omori, IM, Fenton, M; Soares, BGO                                                                                                   | 2010 |
| Surveillance of gastric intestinal metaplasia for the prevention of gastric cancer                                                             | O'Connor, , A, McNamara, D; O'Moráin, CA                                                                                                       | 2013 |
| Surgical approach to hysterectomy for benign gynaecological disease                                                                            | Aarts, , JWM, Nieboer, TE, Johnson, N, Tavender, E, Garry, R, Mol, BWJ; Kluivers, KB                                                           | 2015 |
| Surgical versus non-surgical treatment for lumbar spinal stenosis                                                                              | Zaina, , F, Tomkins-Lane, C, Carragee, E; Negrini, S                                                                                           | 2016 |
| Surgical interventions for symptomatic mild to moderate knee osteoarthritis                                                                    | Palmer, , JS, Monk, AP, Hopewell, S, Bayliss, LE, Jackson, W, Beard, DJ; Price, AJ                                                             | 2019 |
| Surgery for scoliosis in Duchenne muscular dystrophy                                                                                           | Cheuk, , DKL, Wong, V, Wraige, E, Baxter, P; Cole, A                                                                                           | 2015 |
| Systemic treatments for the prevention of venous thrombo-embolic events in paediatric cancer patients with tunnellled central venous catheters | Schoot, , RA, Kremer, LCM, van de Wetering, MD; van Ommen, CH                                                                                  | 2013 |
| Surgical portosystemic shunts versus transjugular intrahepatic portosystemic shunt for variceal haemorrhage in people with cirrhosis           | Brand, , M, Prodehl, L; Ede, CJ                                                                                                                | 2018 |
| Steam inhalation or humidified oxygen for acute bronchiolitis in children up to three years of age                                             | Umoren, , R, Odey, F; Meremikwu, MM                                                                                                            | 2011 |
| Surgical treatment for tubal disease in women due to undergo in vitro fertilisation                                                            | Johnson, , N, van Voorst, S, Sowter, MC, Strandell, A; Mol, BWJ                                                                                | 2010 |
| Surgery for primary supratentorial intracerebral haemorrhage                                                                                   | Prasad, , K, Mendelow, AD; Gregson, B                                                                                                          | 2008 |
| Statins for children with familial hypercholesterolemia                                                                                        | Vuorio, , A, Kuoppala, J, Kovanen, PT, Humphries, SE, Tonstad, S, Wiegman, A, Drogari, E; Ramaswami, U                                         | 2017 |
| Systemic corticosteroids for acute exacerbations of chronic obstructive pulmonary disease                                                      | Walters, , JAE, Tan, DJ, White, CJ, Gibson, PG, Wood-Baker, R; Walters, EH                                                                     | 2014 |
| Surfactant therapy for bronchiolitis in critically ill infants                                                                                 | Jat, , KR; Chawla, D                                                                                                                           | 2015 |
| Surgical orbital decompression for thyroid eye disease                                                                                         | Boboridis, , KG; Bunce, C                                                                                                                      | 2011 |
| Subcutaneous closure versus no subcutaneous closure after non-caesarean surgical procedures                                                    | Gurusamy, , KS, Toon, CD; Davidson, BR                                                                                                         | 2014 |

|                                                                                                                                                     |                                                                                                                                              |      |
|-----------------------------------------------------------------------------------------------------------------------------------------------------|----------------------------------------------------------------------------------------------------------------------------------------------|------|
| Surgical treatment options for carpal tunnel syndrome                                                                                               | Scholten, , RJPM, Mink van der Molen, A, Uitdehaag, BMJ, Bouter, LM; de Vet, HCW                                                             | 2007 |
| Surgery or embolization for varicoceles in subfertile men                                                                                           | Kroese, , ACJ, de Lange, NM, Collins, J; Evers, JLH                                                                                          | 2012 |
| Surgical interventions for the rheumatoid shoulder                                                                                                  | Christie, , A, Dagfinrud, H, Engen Matre, K, Flaatten, HI, Ringen Osnes, H; Hagen, KB                                                        | 2010 |
| Statins for age-related macular degeneration                                                                                                        | Gehlbach, , P, Li, T; Hatef, E                                                                                                               | 2016 |
| Surgery for congenital choanal atresia                                                                                                              | Cedin, , AC, Atallah, ÁN, Andriolo, RB, Cruz, OL; Pignatari, SN                                                                              | 2012 |
| Sulodexide for treating venous leg ulcers                                                                                                           | Wu, , B, Lu, J, Yang, M; Xu, T                                                                                                               | 2016 |
| Task-oriented interventions for children with developmental co-ordination disorder                                                                  | Miyahara, , M, Hillier, SL, Pridham, L; Nakagawa, S                                                                                          | 2017 |
| Surgical resection versus liver transplant for patients with hepatocellular carcinoma                                                               | Taefi, , A, Abrishami, A, Nasseri-Moghaddam, S, Eghtesad, B; Sherman, M                                                                      | 2013 |
| Systemic antibiotics versus topical treatments for chronically discharging ears with underlying eardrum perforations                                | Macfadyen, , CA, Acuin, JM; Gamble, CL                                                                                                       | 2006 |
| Tailored interventions based on sputum eosinophils versus clinical symptoms for asthma in children and adults                                       | Petsky, , HL, Li, A; Chang, AB                                                                                                               | 2017 |
| Sucrose for analgesia in newborn infants undergoing painful procedures                                                                              | Stevens, , B, Yamada, J, Ohlsson, A, Haliburton, S; Shorkey, A                                                                               | 2016 |
| Survival differences with immediate versus delayed chemotherapy for asymptomatic incurable metastatic colorectal cancer                             | Claassen, , YHM, van der Valk, MJM, Breugom, AJ, Frouws, MA, Bastiaannet, E, Liefers, GJ, van de Velde, CJH; Kapiteijn, E                    | 2018 |
| Stavudine, lamivudine and nevirapine combination therapy for treatment of HIV infection and AIDS in adults.                                         | Siegfried, , N, van Deventer, PJU, Mahomed, FA; Rutherford, GW                                                                               | 2006 |
| Statins for the treatment of dementia                                                                                                               | McGuinness, , B, Craig, D, Bullock, R, Malouf, R; Passmore, P                                                                                | 2014 |
| Steroid avoidance or withdrawal for kidney transplant recipients                                                                                    | Haller, , MC, Royuela, A, Nagler, EV, Pascual, J; Webster, AC                                                                                | 2016 |
| Surgery versus medical therapy for heavy menstrual bleeding                                                                                         | Marjoribanks, , J, Lethaby, A; Farquhar, C                                                                                                   | 2016 |
| Systematic versus opportunistic risk assessment for the primary prevention of cardiovascular disease                                                | Dyakova, , M, Shantikumar, S, Colquitt, JL, Drew, CM, Sime, M, MacIver, J, Wright, N, Clarke, A; Rees, K                                     | 2016 |
| Tai Chi for chronic obstructive pulmonary disease (COPD)                                                                                            | Ngai, , SPC, Jones, AYM; Tam, WWS                                                                                                            | 2016 |
| Surgery for traumatic optic neuropathy                                                                                                              | Yu-Wai-Man, , P; Griffiths, PG                                                                                                               | 2013 |
| Structural and community-level interventions for increasing condom use to prevent the transmission of HIV and other sexually transmitted infections | Moreno, , R, Nababan, HY, Ota, E, Wariki, WMV, Ezoe, S, Gilmour, S; Shibuya, K                                                               | 2014 |
| Systemic antibiotics for treating malignant wounds                                                                                                  | Ramasubbu, , DA, Smith, V, Hayden, F; Cronin, P                                                                                              | 2017 |
| Surgical versus medical treatment with cyclooxygenase inhibitors for symptomatic patent ductus arteriosus in preterm infants                        | Malviya, , MN, Ohlsson, A; Shah, SS                                                                                                          | 2013 |
| Surgical intervention for anorectal fistula                                                                                                         | Jacob, , TJ, Perakath, B; Keighley, MR                                                                                                       | 2010 |
| Surgery for the treatment of obesity in children and adolescents                                                                                    | Ells, , LJ, Mead, E, Atkinson, G, Corpeleijn, E, Roberts, K, Viner, R, Baur, L, Metzendorf, MI; Richter, B                                   | 2015 |
| Surgical interventions for treating pectus excavatum                                                                                                | de Oliveira Carvalho, , PE, da Silva, MVM, Rodrigues, OR; Cataneo, AJM                                                                       | 2014 |
| Statins for acute ischemic stroke                                                                                                                   | Squizzato, , A, Romualdi, E, Dentali, F; Ageno, W                                                                                            | 2011 |
| Subacromial decompression surgery for rotator cuff disease                                                                                          | Karjalainen, , TV, Jain, NB, Page, CM, Lähdeoja, TA, Johnston, RV, Salameh, P, Kavaja, L, Ardern, CL, Agarwal, A, Vandvik, PO; Buchbinder, R | 2019 |
| Surgery for the resolution of symptoms in malignant bowel obstruction in advanced gynaecological and gastrointestinal cancer                        | Cousins, , SE, Tempest, E; Feuer, DJ                                                                                                         | 2016 |
| Systemic administration of local anesthetic agents to relieve neuropathic pain                                                                      | Challapalli, , V, Tremont-Lukats, IW, McNicol, ED, Lau, J; Carr, DB                                                                          | 2005 |
| Systemic and topical antibiotics for chronic rhinosinusitis                                                                                         | Head, , K, Chong, LY, Piromchai, P, Hopkins, C, Philpott, C, Schilder, AGM; Burton, MJ                                                       | 2016 |
| Surgical versus non-surgical interventions in people with adolescent idiopathic scoliosis                                                           | Bettany-Saltikov, , J, Weiss, HR, Chockalingam, N, Taranu, R, Srinivas, S, Hogg, J, Whittaker, V, Kalyan, RV; Arnell, T                      | 2015 |
| Surgical versus conservative interventions for displaced intra-articular calcaneal fractures                                                        | Bruce, , J; Sutherland, A                                                                                                                    | 2013 |
| Surgery for trigger finger                                                                                                                          | Fiorini, , HJ, Tamaoki, MJ, Lenza, M, Gomes dos Santos, JB, Faloppa, F; Belloti, JC                                                          | 2018 |
| Stavudine or zidovudine in three-drug combination therapy for initial treatment of HIV infection in antiretroviral-naïve individuals                | Spaulding, , A, Rutherford, GW; Siegfried, N                                                                                                 | 2010 |
| Street lighting for preventing road traffic injuries                                                                                                | Beyer, , FR; Ker, K                                                                                                                          | 2009 |
| Systemic antimicrobial prophylaxis for percutaneous endoscopic gastrostomy                                                                          | Lipp, , A; Lusardi, G                                                                                                                        | 2013 |
| Surgery versus sclerotherapy for the treatment of varicose veins                                                                                    | Rigby, , KA, Palfreyman, SSJ, Beverley, C; Michaels, JA                                                                                      | 2004 |
| Surgery for small asymptomatic abdominal aortic aneurysms                                                                                           | Filardo, , G, Powell, JT, Martinez, MAM; Ballard, DJ                                                                                         | 2015 |
| Surgical interventions for chronic rhinosinusitis with nasal polyps                                                                                 | Sharma, , R, Lakhani, R, Rimmer, J; Hopkins, C                                                                                               | 2014 |

|                                                                                                                                               |                                                                                                                                            |      |
|-----------------------------------------------------------------------------------------------------------------------------------------------|--------------------------------------------------------------------------------------------------------------------------------------------|------|
| Superoxide dismutase for preventing chronic lung disease in mechanically ventilated preterm infants                                           | Suresh, , G, Davis, JM; Soll, R                                                                                                            | 2001 |
| Stopping long-acting beta2-agonists (LABA) for children with asthma well controlled on LABA and inhaled corticosteroids                       | Kew, , KM, Beggs, S; Ahmad, S                                                                                                              | 2015 |
| Surgery versus radiotherapy for muscle invasive bladder cancer                                                                                | Shelley, , M, Barber, J, Wilt, TJ; Mason, M                                                                                                | 2001 |
| Tamponade in surgery for retinal detachment associated with proliferative vitreoretinopathy                                                   | Schwartz, , SG, Flynn Jr, HW, Lee, WH; Wang, X                                                                                             | 2014 |
| Targeted mass media interventions promoting healthy behaviours to reduce risk of non-communicable diseases in adult, ethnic minorities        | Mosdøl, , A, Lidal, IB, Straumann, GH; Vist, GE                                                                                            | 2017 |
| Surgical interventions for bilateral congenital cataract                                                                                      | Long, , V, Chen, S; Hatt, SR                                                                                                               | 2006 |
| Strabismus surgery before versus after completion of amblyopia therapy in children                                                            | Korah, , S, Philip, S, Jasper, S, Antonio-Santos, A; Braganza, A                                                                           | 2014 |
| Surgical sealant for preventing air leaks after pulmonary resections in patients with lung cancer                                             | Belda-Sanchis, , J, Serra-Mitjans, M, Iglesias Sentis, M; Rami, R                                                                          | 2010 |
| System change interventions for smoking cessation                                                                                             | Thomas, , D, Abramson, MJ, Bonevski, B; George, J                                                                                          | 2017 |
| Structured treatment interruptions (STI) in chronic suppressed HIV infection in adults                                                        | Pant Pai, , N, Tulskey, JP, Lawrence, J, Colford, JM; Reingold, AL                                                                         | 2005 |
| Systemic antibiotics for symptomatic apical periodontitis and acute apical abscess in adults                                                  | Cope, , AL, Francis, N, Wood, F; Chestnutt, IG                                                                                             | 2018 |
| Sumatriptan (subcutaneous route of administration) for acute migraine attacks in adults                                                       | Derry, , CJ, Derry, S; Moore, RA                                                                                                           | 2012 |
| Swallowing therapy for dysphagia in acute and subacute stroke                                                                                 | Bath, , PM, Lee, HS; Everton, LF                                                                                                           | 2018 |
| Sumatriptan (rectal route of administration) for acute migraine attacks in adults                                                             | Derry, , CJ, Derry, S; Moore, RA                                                                                                           | 2012 |
| Sugammadex, a selective reversal medication for preventing postoperative residual neuromuscular blockade                                      | Abrishami, , A, Ho, J, Wong, J, Yin, L; Chung, F                                                                                           | 2009 |
| Subcutaneous unfractionated heparin for the initial treatment of venous thromboembolism                                                       | Robertson, , L; Strachan, J                                                                                                                | 2017 |
| Sumatriptan (intranasal route of administration) for acute migraine attacks in adults                                                         | Derry, , CJ, Derry, S; Moore, RA                                                                                                           | 2012 |
| Sweet-tasting solutions for needle-related procedural pain in infants one month to one year of age                                            | Kassab, , M, Foster, JP, Foureur, M; Fowler, C                                                                                             | 2012 |
| Systemic corticosteroids for the management of cancer-related breathlessness (dyspnoea) in adults                                             | Haywood, , A, Duc, J, Good, P, Khan, S, Rickett, K, Vayne-Bossert, P; Hardy, JR                                                            | 2019 |
| Stopping long-acting beta2-agonists (LABA) for adults with asthma well controlled by LABA and inhaled corticosteroids                         | Ahmad, , S, Kew, KM; Normansell, R                                                                                                         | 2015 |
| Surgical interventions for the prevention or treatment of lymphoedema after breast cancer treatment                                           | Markkula, , SP, Leung, N, Allen, VB; Furniss, D                                                                                            | 2019 |
| Swimming training for asthma in children and adolescents aged 18 years and under                                                              | Beggs, , S, Foong, YC, Le, HCT, Noor, D, Wood-Baker, R; Walters, JAE                                                                       | 2013 |
| Surgery versus non-surgical management for unilateral ureteric-pelvic junction obstruction in newborns and infants less than two years of age | Weitz, , M, Portz, S, Laube, GF, Meerpohl, JJ; Bassler, D                                                                                  | 2016 |
| Subfascial endoscopic perforator surgery (SEPS) for treating venous leg ulcers                                                                | Lin, , ZC, Loveland, PM, Johnston, RV, Bruce, M; Weller, CD                                                                                | 2019 |
| S-Adenosylmethionine for osteoarthritis of the knee or hip                                                                                    | Rutjes, , AWS, Nüesch, E, Reichenbach, S; Jüni, P                                                                                          | 2009 |
| Sulfasalazine for ankylosing spondylitis                                                                                                      | Chen, , J, Lin, S; Liu, C                                                                                                                  | 2014 |
| Subpial transection surgery for epilepsy                                                                                                      | Krishnaiah, , B, Ramaratnam, S; Ranganathan, LN                                                                                            | 2018 |
| Tailored interventions based on exhaled nitric oxide versus clinical symptoms for asthma in children and adults                               | Petsky, , HL, Cates, CJ, Li, A, Kynaston, JA, Turner, C; Chang, AB                                                                         | 2009 |
| Sun protection for preventing basal cell and squamous cell skin cancers                                                                       | Sánchez, , G, Nova, J, Rodriguez-Hernandez, AE, Medina, RD, Solorzano-Restrepo, C, Gonzalez, J, Olmos, M, Godfrey, K; Arevalo-Rodriguez, I | 2016 |
| Surgery versus radical endotherapies for early cancer and high-grade dysplasia in Barrett's oesophagus                                        | Bennett, , C, Green, S, DeCaestecker, J, Almond, M, Barr, H, Bhandari, P, Ragunath, K, Singh, R; Jankowski, J                              | 2012 |
| Statins for non-alcoholic fatty liver disease and non-alcoholic steatohepatitis                                                               | Eslami, , L, Merat, S, Malekzadeh, R, Nasser-Moghaddam, S; Aramin, H                                                                       | 2013 |
| Stent placement versus surgical palliation for adults with malignant gastric outlet obstruction                                               | Upchurch, , E, Ragusa, M; Cirocchi, R                                                                                                      | 2018 |
| Sublingual immunotherapy for asthma                                                                                                           | Normansell, , R, Kew, KM; Bridgman, AL                                                                                                     | 2015 |
| Supportive devices for preventing and treating subluxation of the shoulder after stroke                                                       | Ada, , L, Foongchomcheay, A; Canning, CG                                                                                                   | 2005 |
| Surfactant for bacterial pneumonia in late preterm and term infants                                                                           | Tan, , K, Lai, NM; Sharma, A                                                                                                               | 2012 |
| Systemic interventions for recurrent aphthous stomatitis (mouth ulcers)                                                                       | Brocklehurst, , P, Tickle, M, Glenny, AM, Lewis, MA, Pemberton, MN, Taylor, J, Walsh, T, Riley, P; Yates, JM                               | 2012 |
| Task shifting from doctors to non-doctors for initiation and maintenance of antiretroviral therapy                                            | Kredo, , T, Adeniyi, FB, Bateganya, M; Pienaar, ED                                                                                         | 2014 |
| Surgical techniques for the removal of mandibular wisdom teeth                                                                                | Coulthard, , P, Bailey, E, Esposito, M, Furness, S, Renton, TF; Worthington, HV                                                            | 2014 |
| Surgery for local and locally advanced non-small cell lung cancer                                                                             | Manser, , R, Wright, G, Hart, D, Byrnes, G, Campbell, D, Wainer, Z; Tort, S                                                                | 2005 |

|                                                                                                                                         |                                                                                                                       |      |
|-----------------------------------------------------------------------------------------------------------------------------------------|-----------------------------------------------------------------------------------------------------------------------|------|
| Systemic antifungal therapy for tinea capitis in children                                                                               | Chen, , X, Jiang, X, Yang, M, González, U, Lin, X, Hua, X, Xue, S, Zhang, M; Bennett, C                               | 2016 |
| Surgical removal versus retention for the management of asymptomatic disease-free impacted wisdom teeth                                 | Ghaemini, , H, Perry, J, Nienhuijs, MEL, Toedtling, V, Tummers, M, Hoppenreijts, TJM, Van der Sanden, WJM; Mettes, TG | 2016 |
| Supportive interventions for enhancing dietary intake in malnourished or nutritionally at-risk adults                                   | Baldwin, , C, Kimber, KL, Gibbs, M; Weekes, CE                                                                        | 2016 |
| Subcutaneous rapid-acting insulin analogues for diabetic ketoacidosis                                                                   | Andrade-Castellanos, , CA, Colunga-Lozano, LE, Delgado-Figueroa, N; Gonzalez-Padilla, DA                              | 2016 |
| Strategies for improving adherence to antiepileptic drug treatment in people with epilepsy                                              | Al-aqeel, , S, Gershuni, O, Al-sabhan, J; Hiligsmann, M                                                               | 2017 |
| Stent graft types for endovascular repair of thoracic aortic aneurysms                                                                  | Rolph, , R, Duffy, JMN; Waltham, M                                                                                    | 2015 |
| Strategies for integrating primary health services in low- and middle-income countries at the point of delivery                         | Dudley, , L; Garner, P                                                                                                | 2011 |
| Sulthiame monotherapy for epilepsy                                                                                                      | Milburn-McNulty, , P, Powell, G, Sills, GJ; Marson, AG                                                                | 2014 |
| Surgical versus conservative interventions for treating ankle fractures in adults                                                       | Donken, , CCMA, Al-Khateeb, H, Verhofstad, MHJ; van Laarhoven, CJHM                                                   | 2012 |
| Surgical resection versus non-surgical treatment for hepatic node positive patients with colorectal liver metastases                    | Gurusamy, , KS, Ramamoorthy, R, Imber, C; Davidson, BR                                                                | 2010 |
| Target of rapamycin inhibitors (TOR-I; sirolimus and everolimus) for primary immunosuppression in kidney transplant recipients          | Webster, , AC, Lee, VWS, Chapman, JR; Craig, JC                                                                       | 2006 |
| Tacrolimus versus cyclosporin as primary immunosuppression for kidney transplant recipients                                             | Webster, , AC, Taylor, RRS, Chapman, JR; Craig, JC                                                                    | 2005 |
| Statins for aortic valve stenosis                                                                                                       | Thiago, , L, Tsuji, SR, Nyong, J, Puga, MES, Gois, AFT, Macedo, CR, Valente, O; Atallah, AN                           | 2016 |
| Surfactant for pulmonary haemorrhage in neonates                                                                                        | Aziz, , A; Ohlsson, A                                                                                                 | 2012 |
| Steroids for symptom control in infectious mononucleosis                                                                                | Rezk, , E, Nofal, YH, Hamzeh, A, Aboujaib, MF, AlKheder, MA; Al Hammad, MF                                            | 2015 |
| Surgical interventions for early squamous cell carcinoma of the vulva                                                                   | van der Velden, J                                                                                                     | 2000 |
| Systemic corticosteroid regimens for prevention of bronchopulmonary dysplasia in preterm infants                                        | Onland, , W, De Jaegere, APMC, Offringa, M; van Kaam, A                                                               | 2017 |
| Steroid hormones for contraception in men                                                                                               | Grimes, , DA, Lopez, LM, Gallo, MF, Halpern, V, Nanda, K; Schulz, KF                                                  | 2012 |
| Stretch for the treatment and prevention of contractures                                                                                | Harvey, , LA, Katalinic, OM, Herbert, RD, Moseley, AM, Lannin, NA; Schurr, K                                          | 2017 |
| Stiripentol add-on therapy for focal refractory epilepsy                                                                                | Brigo, , F, Igwe, SC; Bragazzi, NL                                                                                    | 2018 |
| Steroid sex hormones for lower limb atherosclerosis                                                                                     | Price, , J; Leng, GC                                                                                                  | 2012 |
| Surgery for varicose veins: use of tourniquet                                                                                           | Rigby, , KA, Palfreyman, SJ, Beverley, C; Michaels, JA                                                                | 2013 |
| Steroidal contraceptives and bone fractures in women: evidence from observational studies                                               | Lopez, , LM, Chen, M, Mullins Long, S, Curtis, KM; Helmerhorst, FM                                                    | 2015 |
| Surgical versus endoscopic treatment of bile duct stones                                                                                | Dasari, , BVM, Tan, CJ, Gurusamy, KS, Martin, DJ, Kirk, G, McKie, L, Diamond, T; Taylor, MA                           | 2013 |
| Surgery for epilepsy                                                                                                                    | West, , S, Nevitt, SJ, Cotton, J, Gandhi, S, Weston, J, Sudan, A, Ramirez, R; Newton, R                               | 2019 |
| Statins versus placebo for people with chronic obstructive pulmonary disease                                                            | Walsh, , A, Perrem, L, Khashan, AS, Henry, MT; Ni Chroinin, M                                                         | 2019 |
| Veno-venous bypass versus none for liver transplantation                                                                                | Gurusamy, , KS, Koti, R, Pamecha, V; Davidson, BR                                                                     | 2011 |
| Vitamin E for Alzheimer's dementia and mild cognitive impairment                                                                        | Farina, , N, Llewellyn, D, Isaac, MGEKN; Tabet, N                                                                     | 2017 |
| Vasopressin and its analogues for the treatment of refractory hypotension in neonates                                                   | Shivanna, , B, Rios, D, Rossano, J, Fernandes, CJ; Pammi, M                                                           | 2013 |
| Types of indwelling urethral catheters for short-term catheterisation in hospitalised adults                                            | Lam, , TBL, Omar, MI, Fisher, E, Gillies, K; MacLennan, S                                                             | 2014 |
| Vaccines for preventing typhoid fever                                                                                                   | Milligan, , R, Paul, M, Richardson, M; Neuberger, A                                                                   | 2018 |
| Ursodeoxycholic acid for primary biliary cirrhosis                                                                                      | Rudic, , JS, Poropat, G, Krstic, MN, Bjelakovic, G; Gluud, C                                                          | 2012 |
| Types of indwelling urinary catheters for long-term bladder drainage in adults                                                          | Jahn, , P, Beutner, K; Langer, G                                                                                      | 2012 |
| Treadmill training and body weight support for walking after stroke                                                                     | Mehrholz, , J, Thomas, S; Elsner, B                                                                                   | 2017 |
| Treatment of infantile spasms                                                                                                           | Hancock, , EC, Osborne, JP; Edwards, SW                                                                               | 2013 |
| Vaccines for preventing influenza in people with cystic fibrosis                                                                        | Dharmaraj, , P; Smyth, RL                                                                                             | 2014 |
| Trihexyphenidyl for dystonia in cerebral palsy                                                                                          | Harvey, , AR, Baker, LB, Reddihough, DS, Scheinberg, A; Williams, K                                                   | 2018 |
| Triclosan/copolymer containing toothpastes for oral health                                                                              | Riley, , P; Lamont, T                                                                                                 | 2013 |
| Vitamin B and its derivatives for diabetic kidney disease                                                                               | Raval, , AD, Thakker, D, Rangoonwala, AN, Gor, D; Walia, R                                                            | 2015 |
| Urinary diversion and bladder reconstruction/replacement using intestinal segments for intractable incontinence or following cystectomy | Cody, , JD, Nabi, G, Dublin, N, McClinton, S, Neal, DE, Pickard, R; Yong, SM                                          | 2012 |

|                                                                                                                               |                                                                                                                       |      |
|-------------------------------------------------------------------------------------------------------------------------------|-----------------------------------------------------------------------------------------------------------------------|------|
| Urine tests for Down's syndrome screening                                                                                     | Allred, , SK, Guo, B, Takwoingi, Y, Pennant, M, Wisniewski, S, Deeks, JJ, Neilson, JP; Alfirevic, Z                   | 2015 |
| Vaccines for preventing influenza in healthy adults                                                                           | Demicheli, , V, Jefferson, T, Ferroni, E, Rivetti, A; Di Pietrantonj, C                                               | 2018 |
| Treatment including anthracyclines versus treatment not including anthracyclines for childhood cancer                         | van Dalen, , EC, Raphaël, MF, Caron, HN; Kremer, LCM                                                                  | 2014 |
| Treatment of hypertension in peripheral arterial disease                                                                      | Lane, , DA; Lip, GYH                                                                                                  | 2013 |
| Treatment for Fisher syndrome, Bickerstaff's brainstem encephalitis and related disorders                                     | Overell, , JR, Hseih, ST, Odaka, M, Yuki, N; Willison, HJ                                                             | 2007 |
| Vitamin A supplements for reducing mother-to-child HIV transmission                                                           | Wiysonge, , CS, Ndze, VN, Kongnyuy, EJ; Shey, MS                                                                      | 2017 |
| Vaginal disinfection for preventing mother-to-child transmission of HIV infection                                             | Wiysonge, , CS, Shey, M, Shang, J, Sterne, JAC; Brocklehurst, P                                                       | 2005 |
| Treatment of obstructive sleep apnoea for chronic cough in children                                                           | Teoh, , L, Hurwitz, M, Acworth, JP, van Asperen, P; Chang, AB                                                         | 2011 |
| Treatments for chronic inflammatory demyelinating polyradiculoneuropathy (CIDP): an overview of systematic reviews            | Oaklander, , AL, Lunn, MPT, Hughes, RAC, van Schaik, IN, Frost, C; Chalk, CH                                          | 2017 |
| Treatment of latent tuberculosis infection in HIV infected persons                                                            | Akolo, , C, Adetifa, I, Shepperd, S; Volmink, J                                                                       | 2010 |
| Treatments for breast abscesses in breastfeeding women                                                                        | Irusen, , H, Rohwer, AC, Steyn, DW; Young, T                                                                          | 2015 |
| Treatment for women with postpartum iron deficiency anaemia                                                                   | Dodd, , JM, Dare, MR; Middleton, P                                                                                    | 2004 |
| Vitamin A supplementation to prevent mortality and short- and long-term morbidity in very low birth weight infants            | Darlow, , BA, Graham, PJ; Rojas-Reyes, MX                                                                             | 2016 |
| Vitamin C supplementation in pregnancy                                                                                        | Rumbold, , A, Ota, E, Nagata, C, Shahrook, S; Crowther, CA                                                            | 2015 |
| Type of incision for below knee amputation                                                                                    | Tisi, , PV; Than, MM                                                                                                  | 2014 |
| Vapocoolants (cold spray) for pain treatment during intravenous cannulation                                                   | Griffith, , RJ, Jordan, V, Herd, D, Reed, PW; Dalziel, SR                                                             | 2016 |
| Vaccines for the common cold                                                                                                  | Simancas-Racines, , D, Franco, JVA, Guerra, CV, Felix, ML, Hidalgo, R; Martinez-Zapata, MJ                            | 2017 |
| Trastuzumab-containing regimens for metastatic breast cancer                                                                  | Balduzzi, , S, Mantarro, S, Guarneri, V, Tagliabue, L, Pistotti, V, Moja, L; D'Amico, R                               | 2014 |
| Treatment for hepatitis C virus-associated mixed cryoglobulinaemia                                                            | Montero, , N, Favà, A, Rodriguez, E, Barrios, C, Cruzado, JM, Pascual, J; Soler, MJ                                   | 2018 |
| Uric acid lowering therapies for preventing or delaying the progression of chronic kidney disease                             | Sampson, , AL, Singer, RF; Walters, GD                                                                                | 2017 |
| Vision screening for amblyopia in childhood                                                                                   | Powell, , C; Hatt, SR                                                                                                 | 2009 |
| Vaccines for preventing smallpox                                                                                              | Metzger, , W; Mordmueller, BG                                                                                         | 2007 |
| Treatment for mitochondrial disorders                                                                                         | Pfeffer, , G, Majamaa, K, Turnbull, DM, Thorburn, D; Chinnery, PF                                                     | 2012 |
| Vector and reservoir control for preventing leishmaniasis                                                                     | González, , U, Pinart, M, Sinclair, D, Firooz, A, Enk, C, Vélez, ID, Esterhuizen, TM, Tristan, M; Alvar, J            | 2015 |
| Uricosuric medications for chronic gout                                                                                       | Kydd, , ASR, Seth, R, Buchbinder, R, Edwards, CJ; Bombardier, C                                                       | 2014 |
| Treatment for idiopathic and hereditary neuralgic amyotrophy (brachial neuritis)                                              | van Alfen, , N, van Engelen, BGM; Hughes, RAC                                                                         | 2009 |
| Treatment for preventing bleeding in people with haemophilia or other congenital bleeding disorders undergoing surgery        | Coppola, , A, Windyga, J, Tufano, A, Yeung, C; Di Minno, MND                                                          | 2015 |
| Ultra-radical (extensive) surgery versus standard surgery for the primary cytoreduction of advanced epithelial ovarian cancer | Ang, , C, Chan, KKL, Bryant, A, Naik, R; Dickinson, HO                                                                | 2011 |
| Treatment for postpolio syndrome                                                                                              | Koopman, , FS, Beelen, A, Gilhus, NE, de Visser, M; Nollet, F                                                         | 2015 |
| Vitamin D supplementation for sickle cell disease                                                                             | Soe, , HHK, Abas, ABL, Than, NN, Ni, H, Singh, J, Said, ARBM; Osunkwo, I                                              | 2017 |
| Vitamin B for treating peripheral neuropathy                                                                                  | Ang, , CD, Alviar, MJM, Dans, AL, Bautista-Velez, GGP, Villaruz-Sulit, MVC, Tan, JJ, Co, HU, Bautista, MRM; Roxas, AA | 2008 |
| Transfusion thresholds and other strategies for guiding allogeneic red blood cell transfusion                                 | Carson, , JL, Stanworth, SJ, Roubinian, N, Fergusson, DA, Triulzi, D, Doree, C; Hebert, PC                            | 2016 |
| Trial of instrumental delivery in theatre versus immediate caesarean section for anticipated difficult assisted births        | Majoko, , F; Gardener, G                                                                                              | 2012 |
| Treadmill interventions in children under six years of age at risk of neuromotor delay                                        | Valentin-Gudiol, , M, Mattern-Baxter, K, Girabent-Farrés, M, Bagur-Calafat, C, Hadders-Algra, M; Angulo-Barroso, RM   | 2017 |
| Vitamin D compounds for people with chronic kidney disease requiring dialysis                                                 | Palmer, , SC, McGregor, DO, Craig, JC, Elder, G, Macaskill, P; Strippoli, GFM                                         | 2009 |
| Treatment for paraneoplastic neuropathies                                                                                     | Giometto, , B, Vitaliani, R, Lindeck-Pozza, E, Grisold, W; Vedeler, C                                                 | 2012 |
| Treatment of dental complications in sickle cell disease                                                                      | Mulimani, , P, Ballas, SK, Abas, ABL; Karanth, L                                                                      | 2016 |
| Vena caval filters for the prevention of pulmonary embolism                                                                   | Young, , T, Tang, H; Hughes, R                                                                                        | 2010 |
| Very early discharge versus early discharge versus non-early discharge in children with cancer and febrile neutropenia        | Loeffen, , EAH, te Poele, EM, Tissing, WJE, Boezen, HM; de Bont, ESJM                                                 | 2016 |

|                                                                                                                                                                 |                                                                                                  |      |
|-----------------------------------------------------------------------------------------------------------------------------------------------------------------|--------------------------------------------------------------------------------------------------|------|
| Treatment of valvular heart disease during pregnancy for improving maternal and neonatal outcome                                                                | Henriquez, , DDCA, Roos-Hesselink, JW, Schaliq, MJ, Klautz, RJM, Helmerhorst, FM; de Groot, CJM  | 2011 |
| Treatment for POEMS (polyneuropathy, organomegaly, endocrinopathy, M-protein, and skin changes) syndrome                                                        | Kuwabara, , S, Dispenzieri, A, Arimura, K, Misawa, S; Nakaseko, C                                | 2012 |
| Ultrasound for fetal assessment in early pregnancy                                                                                                              | Whitworth, , M, Bricker, L; Mullan, C                                                            | 2015 |
| Vitamin B12 for cognition                                                                                                                                       | Malouf, , R; Areosa Sastre, A                                                                    | 2003 |
| Vaccines for preventing influenza in healthy children                                                                                                           | Jefferson, , T, Rivetti, A, Di Pietrantonj, C; Demicheli, V                                      | 2018 |
| Vitamin A supplementation for postpartum women                                                                                                                  | Oliveira, , JM, Allert, R; East, CE                                                              | 2016 |
| Vaccines for preventing enterotoxigenic Escherichia coli (ETEC) diarrhoea                                                                                       | Ahmed, , T, Bhuiyan, TR, Zaman, K, Sinclair, D; Qadri, F                                         | 2013 |
| Vaccines for preventing influenza in the elderly                                                                                                                | Demicheli, , V, Jefferson, T, Di Pietrantonj, C, Ferroni, E, Thorning, S, Thomas, RE; Rivetti, A | 2018 |
| Valproic acid, valproate and divalproex in the maintenance treatment of bipolar disorder                                                                        | Cipriani, , A, Reid, K, Young, AH, Macritchie, K; Geddes, J                                      | 2013 |
| Transpyloric versus gastric tube feeding for preterm infants                                                                                                    | Watson, , J; McGuire, W                                                                          | 2013 |
| Vitamin C for asthma and exercise-induced bronchoconstriction                                                                                                   | Milan, , SJ, Hart, A; Wilkinson, M                                                               | 2013 |
| Vitamin D for the treatment of chronic painful conditions in adults                                                                                             | Straube, , S, Derry, S, Straube, C; Moore, RA                                                    | 2015 |
| Vasodilators and vasoactive substances for idiopathic sudden sensorineural hearing loss                                                                         | Agarwal, , L; Pothier, DD                                                                        | 2009 |
| Transparent Cap Colonoscopy versus Standard Colonoscopy to Improve Caecal Intubation                                                                            | Morgan, , J, Thomas, K, Lee-Robichaud, H, Nelson, RL; Braungart, S                               | 2012 |
| Vitamin C for preventing and treating tetanus                                                                                                                   | Hemilä, , H; Koivula, T                                                                          | 2013 |
| Tyrosine supplementation for phenylketonuria                                                                                                                    | Webster, , D; Wildgoose, J                                                                       | 2013 |
| Virtual reality for stroke rehabilitation                                                                                                                       | Laver, , KE, Lange, B, George, S, Deutsch, JE, Saposnik, G; Crotty, M                            | 2017 |
| Treatments for iron-deficiency anaemia in pregnancy                                                                                                             | Revez, , L, Gyte, GML, Cuervo, LG; Casasbuenas, A                                                | 2011 |
| Vaccines for preventing anthrax                                                                                                                                 | Donegan, , S, Bellamy, R; Gamble, CL                                                             | 2009 |
| Unconditional cash transfers for reducing poverty and vulnerabilities: effect on use of health services and health outcomes in low- and middle-income countries | Pega, , F, Liu, SY, Walter, S, Pabayo, R, Saith, R; Lhachimi, SK                                 | 2017 |
| Types of intraocular lenses for cataract surgery in eyes with uveitis                                                                                           | Leung, , TG, Lindsley, K; Kuo, IC                                                                | 2014 |
| Treatment and prevention of pouchitis after ileal pouch-anal anastomosis for chronic ulcerative colitis                                                         | Nguyen, , N, Zhang, B, Holubar, SD, Pardi, DS; Singh, S                                          | 2019 |
| Treatment for cramps in amyotrophic lateral sclerosis/motor neuron disease                                                                                      | Baldinger, , R, Katzberg, HD; Weber, M                                                           | 2012 |
| Umeclidinium bromide versus placebo for people with chronic obstructive pulmonary disease (COPD)                                                                | Ni, , H, Htet, A; Moe, S                                                                         | 2017 |
| Treatment for meralgia paraesthetica                                                                                                                            | Khalil, , N, Nicotra, A; Rakowicz, W                                                             | 2012 |
| Treatment for anemia in people with AIDS                                                                                                                        | Martí-Carvajal, , AJ, Solà, I, Peña-Martí, GE; Comunián-Carrasco, G                              | 2011 |
| Treatment for speech disorder in Friedreich ataxia and other hereditary ataxia syndromes                                                                        | Vogel, , AP, Folker, J; Poole, ML                                                                | 2014 |
| Vascular occlusion for elective liver resections                                                                                                                | Gurusamy, , KS, Kumar, Y, Ramamoorthy, R, Sharma, D; Davidson, BR                                | 2009 |
| Treatment for cryoglobulinemic and non-cryoglobulinemic peripheral neuropathy associated with hepatitis C virus infection                                       | Benstead, , TJ, Chalk, CH; Parks, NE                                                             | 2014 |
| Treatment for inclusion body myositis                                                                                                                           | Rose, , MR, Jones, K, Leong, K, Walter, MC, Miller, J, Dalakas, MC, Brassington, R; Griggs, R    | 2015 |
| Ursodeoxycholic acid for cystic fibrosis-related liver disease                                                                                                  | Cheng, , K, Ashby, D; Smyth, RL                                                                  | 2017 |
| Twenty-four hour care for schizophrenia                                                                                                                         | Macpherson, , R, Edwards, TR, Chilvers, R, David, C; Elliott, HJ                                 | 2009 |
| Utero-placental Doppler ultrasound for improving pregnancy outcome                                                                                              | Stampalija, , T, Gyte, GML; Alfirevic, Z                                                         | 2010 |
| Vitamin D supplementation for cystic fibrosis                                                                                                                   | Ferguson, , JH; Chang, AB                                                                        | 2014 |
| Intravenous immunoglobulin for the treatment of childhood encephalitis                                                                                          | Iro, , MA, Martin, NG, Absoud, M; Pollard, AJ                                                    | 2017 |
| Transient elastography for diagnosis of stages of hepatic fibrosis and cirrhosis in people with alcoholic liver disease                                         | Pavlov, , CS, Casazza, G, Nikolova, D, Tsochatzis, E, Burroughs, AK, Ivashkin, VT; Gluud, C      | 2015 |
| Interventions for the treatment of brain radionecrosis after radiotherapy or radiosurgery                                                                       | Chung, , C, Bryant, A; Brown, PD                                                                 | 2018 |
| Vaccines for preventing influenza in people with asthma                                                                                                         | Cates, , CJ; Rowe, BH                                                                            | 2013 |
| Intravenous fluids for reducing the duration of labour in low risk nulliparous women                                                                            | Dawood, , F, Dowswell, T; Quenby, S                                                              | 2013 |
| Vitamin A for preventing acute lower respiratory tract infections in children up to seven years of age                                                          | Chen, , H, Zhuo, Q, Yuan, W, Wang, J; Wu, T                                                      | 2008 |



|                                                                                                                                                  |                                                                                                                                          |      |
|--------------------------------------------------------------------------------------------------------------------------------------------------|------------------------------------------------------------------------------------------------------------------------------------------|------|
| Unfractionated heparin versus low molecular weight heparins for avoiding heparin-induced thrombocytopenia in postoperative patients              | Junqueira, , DR, Zorzela, LM; Perini, E                                                                                                  | 2017 |
| Interventions for treating depression after stroke                                                                                               | Hackett, , ML, Anderson, CS, House, A; Xia, J                                                                                            | 2008 |
| Trypanocidal drugs for chronic asymptomatic Trypanosoma cruzi infection                                                                          | Villar, , JC, Perez, JG, Cortes, OL, Riarte, A, Pepper, M, Marin-Neto, JA; Guyatt, GH                                                    | 2014 |
| Intrauterine insemination versus intracervical insemination in donor sperm treatment                                                             | Kop, , PAL, Mochtar, MH, O'Brien, PA, Van der Veen, F; van Wely, M                                                                       | 2018 |
| Vaginal dilator therapy for women receiving pelvic radiotherapy                                                                                  | Miles, , T; Johnson, N                                                                                                                   | 2014 |
| Interventions to improve adherence to exercise for chronic musculoskeletal pain in adults                                                        | Jordan, , JL, Holden, MA, Mason, EEJ; Foster, NE                                                                                         | 2010 |
| Vagus nerve stimulation for partial seizures                                                                                                     | Panebianco, , M, Rigby, A, Weston, J; Marson, AG                                                                                         | 2015 |
| Interventions to improve antibiotic prescribing practices in ambulatory care                                                                     | Arnold, , SR; Straus, SE                                                                                                                 | 2005 |
| Vaccination for preventing postherpetic neuralgia                                                                                                | Chen, , N, Li, Q, Zhang, Y, Zhou, M, Zhou, D; He, L                                                                                      | 2011 |
| Interventions for replacing missing teeth: dental implants in zygomatic bone for the rehabilitation of the severely deficient edentulous maxilla | Esposito, , M; Worthington, HV                                                                                                           | 2013 |
| Treatment for Barrett's oesophagus                                                                                                               | Rees, , JRE, Lao-Sirieix, P, Wong, A; Fitzgerald, RC                                                                                     | 2010 |
| Interventions for smoking cessation in Indigenous populations                                                                                    | Carson, , KV, Brinn, MP, Peters, M, Veale, A, Esterman, AJ; Smith, BJ                                                                    | 2012 |
| Vestibular rehabilitation for unilateral peripheral vestibular dysfunction                                                                       | McDonnell, , MN; Hillier, SL                                                                                                             | 2015 |
| Interventions for supporting informal caregivers of patients in the terminal phase of a disease                                                  | Candy, , B, Jones, L, Drake, R, Leurent, B; King, M                                                                                      | 2011 |
| Vitamin A for non-measles pneumonia in children                                                                                                  | Wu, , T, Ni, J; Wei, J                                                                                                                   | 2005 |
| Interventions for treating sexual dysfunction in patients with chronic kidney disease                                                            | Vecchio, , M, Navaneethan, SD, Johnson, DW, Lucisano, G, Graziano, G, Saglimbene, V, Ruospo, M, Querques, M, Jannini, EA; Strippoli, GFM | 2010 |
| Vitamin D supplementation for preventing infections in children under five years of age                                                          | Yakoob, , MY, Salam, RA, Khan, FR; Bhutta, ZA                                                                                            | 2016 |
| Interventions for treating chronic ankle instability                                                                                             | de Vries, , JS, Krips, R, Siersevelt, IN, Blankevoort, L; van Dijk, CN                                                                   | 2011 |
| Vaccines for preventing hepatitis B in health-care workers                                                                                       | Chen, , W; Gluud, C                                                                                                                      | 2005 |
| Interventions for treating traumatised ankylosed permanent front teeth                                                                           | de Souza, , RF, Travess, H, Newton, T; Marchesan, MA                                                                                     | 2015 |
| Vitamin D supplementation for improving bone mineral density in children                                                                         | Winzenberg, , TM, Powell, S, Shaw, KA; Jones, G                                                                                          | 2010 |
| Interventions to improve water quality and supply, sanitation and hygiene practices, and their effects on the nutritional status of children     | Dangour, , AD, Watson, L, Cumming, O, Boisson, S, Che, Y, Velleman, Y, Cavill, S, Allen, E; Uauy, R                                      | 2013 |
| Ultrasonography for diagnosis of alcoholic cirrhosis in people with alcoholic liver disease                                                      | Pavlov, , CS, Casazza, G, Semenistaia, M, Nikolova, D, Tsochatzis, E, Liusina, E, Ivashkin, VT; Gluud, C                                 | 2016 |
| Interventions for treating placental abruption                                                                                                   | Neilson, JP                                                                                                                              | 2003 |
| Treatment for primary postpartum haemorrhage                                                                                                     | Mousa, , HA, Blum, J, Abou El Senoun, G, Shakur, H; Alfirevic, Z                                                                         | 2014 |
| Treatment of Kaposi sarcoma in children with HIV-1 infection                                                                                     | Anglemyer, , A, Agrawal, AK; Rutherford, GW                                                                                              | 2014 |
| Interventions to improve access to cataract surgical services and their impact on equity in low- and middle-income countries                     | Ramke, , J, Petkovic, J, Welch, V, Blignault, I, Gilbert, C, Blanchet, K, Christensen, R, Zwi, AB; Tugwell, P                            | 2017 |
| Treatment for women with postpartum iron deficiency anaemia                                                                                      | Markova, , V, Norgaard, A, Jørgensen, KJ; Langhoff-Roos, J                                                                               | 2015 |
| Interventions for treating AIDS-associated Hodgkin's lymphoma in treatment-naïve adults                                                          | Martí-Carvajal, , AJ, Cardona, AF; Rodríguez, ML                                                                                         | 2007 |
| Urinary catheter policies for long-term bladder drainage                                                                                         | Niël-Weise, , BS, van den Broek, PJ, da Silva, EMK; Silva, LA                                                                            | 2012 |
| Interventions for treating simple bone cysts in the long bones of children                                                                       | Zhao, , JG, Wang, J, Huang, WJ, Zhang, P, Ding, N; Shang, J                                                                              | 2017 |
| Urethral (indwelling or intermittent) or suprapubic routes for short-term catheterisation in hospitalised adults                                 | Kidd, , EA, Stewart, F, Kassis, NC, Hom, E; Omar, MI                                                                                     | 2015 |
| Tricyclic antidepressants for attention deficit hyperactivity disorder (ADHD) in children and adolescents                                        | Otasowie, , J, Castells, X, Ehimare, UP; Smith, CH                                                                                       | 2014 |
| Intraoperative frozen section analysis for the diagnosis of early stage ovarian cancer in suspicious pelvic masses                               | Ratnavelu, , NDG, Brown, AP, Mallett, S, Scholten, RJPM, Patel, A, Founta, C, Galaal, K, Cross, P; Naik, R                               | 2016 |
| Transient neurologic symptoms (TNS) following spinal anaesthesia with lidocaine versus other local anaesthetics                                  | Zaric, , D; Pace, NL                                                                                                                     | 2009 |
| Interventions to increase tuberculosis case detection at primary healthcare or community-level services                                          | Mhimbira, , FA, Cuevas, LE, Dacombe, R, Mkopi, A; Sinclair, D                                                                            | 2017 |
| Treatment for familial amyotrophic lateral sclerosis/motor neuron disease                                                                        | Benatar, , M, Kurent, J; Moore, DH                                                                                                       | 2009 |
| Interventions for treating osteoarthritis of the big toe joint                                                                                   | Zammit, , GV, Menz, HB, Munteanu, SE, Landorf, KB; Gilheany, MF                                                                          | 2010 |
| Trypanocidal drugs for late stage, symptomatic Chagas disease (Trypanosoma cruzi infection)                                                      | Vallejo, , M; Reyes, PPA                                                                                                                 | 2005 |
| Interventions for the treatment of twin-twin transfusion syndrome                                                                                | Roberts, , D, Neilson, JP, Kilby, MD; Gates, S                                                                                           | 2014 |

|                                                                                                                                                  |                                                                                                  |      |
|--------------------------------------------------------------------------------------------------------------------------------------------------|--------------------------------------------------------------------------------------------------|------|
| Vaccines for prophylaxis of viral infections in patients with hematological malignancies                                                         | Cheuk, , DKL, Chiang, AKS, Lee, TL, Chan, GCF; Ha, SY                                            | 2011 |
| Interventions to increase the reporting of occupational diseases by physicians                                                                   | Curti, , S, Sauni, R, Spreuwers, D, De Schryver, A, Valenty, M, Rivière, S; Mattioli, S          | 2015 |
| Vaginal chlorhexidine during labour to prevent early-onset neonatal group B streptococcal infection                                              | Ohlsson, , A, Shah, VS; Stade, BC                                                                | 2014 |
| Interventions for the treatment of borderline ovarian tumours                                                                                    | Faluyi, , O, Mackean, M, Gourley, C, Bryant, A; Dickinson, HO                                    | 2010 |
| Treatment for femoral pseudoaneurysms                                                                                                            | Tisi, , PV; Callam, MJ                                                                           | 2013 |
| Intrastromal corneal ring segments for treating keratoconus                                                                                      | Zadnik, , K, Money, S; Lindsley, K                                                               | 2019 |
| Treadmill training for patients with Parkinson's disease                                                                                         | Mehrholz, , J, Kugler, J, Storch, A, Pohl, M, Hirsch, K; Elsner, B                               | 2015 |
| Interventions for rosacea                                                                                                                        | van Zuuren, , EJ, Fedorowicz, Z, Carter, B, van der Linden, MMD; Charland, L                     | 2015 |
| Vision screening of older drivers for preventing road traffic injuries and fatalities                                                            | Desapriya, , E, Harjee, R, Brubacher, J, Chan, H, Hewapathirane, DS, Subzwari, S; Pike, I        | 2014 |
| Interventions to improve adherence to inhaled steroids for asthma                                                                                | Normansell, , R, Kew, KM; Stovold, E                                                             | 2017 |
| Vancomycin for prophylaxis against sepsis in preterm neonates                                                                                    | Craft, , AP, Finer, N; Barrington, KJ                                                            | 2000 |
| Interventions for treating gas gangrene                                                                                                          | Yang, , Z, Hu, J, Qu, Y, Sun, F, Leng, X, Li, H; Zhan, S                                         | 2015 |
| Treatment for Lambert-Eaton myasthenic syndrome                                                                                                  | Keogh, , M, Sedehizadeh, S; Maddison, P                                                          | 2011 |
| Interventions to reduce Staphylococcus aureus in the management of atopic eczema                                                                 | Birnie, , AJ, Bath-Hextall, FJ, Ravenscroft, JC; Williams, HC                                    | 2008 |
| Vitamin A supplementation for the prevention of morbidity and mortality in infants one to six months of age                                      | Imdad, , A, Ahmed, Z; Bhutta, ZA                                                                 | 2016 |
| Interventions to reduce emigration of health care professionals from low- and middle-income countries                                            | Peñaloza, , B, Pantoja, T, Bastias, G, Herrera, CA; Rada, G                                      | 2011 |
| Tumor necrosis factor-alpha antibody for maintenance of remission in Crohn's disease                                                             | Behm, , BW; Bickston, SJ                                                                         | 2008 |
| Transtheoretical model stages of change for dietary and physical exercise modification in weight loss management for overweight and obese adults | Mastellos, , N, Gunn, LH, Felix, LM, Car, J; Majeed, A                                           | 2014 |
| Interventions for psychotic symptoms concomitant with epilepsy                                                                                   | Farooq, , S; Sherin, A                                                                           | 2015 |
| Intravenous immunoglobulin for Guillain-Barré syndrome                                                                                           | Hughes, , RAC, Swan, AV; van Doorn, PA                                                           | 2014 |
| Ultrasound-guided transvaginal ovarian needle drilling for clomiphene-resistant polycystic ovarian syndrome in subfertile women                  | Zhang, , J, Tang, L, Kong, L, Wu, T, Xu, L, Pan, X; Liu, GJ                                      | 2019 |
| Interventions to enhance return-to-work for cancer patients                                                                                      | de Boer, , AGEM, Taskila, TK, Tamminga, SJ, Feuerstein, M, Frings-Dresen, MHW; Verbeek, JH       | 2015 |
| Use of biochemical tests of placental function for improving pregnancy outcome                                                                   | Heazell, , AEP, Whitworth, M, Duley, L; Thornton, JG                                             | 2015 |
| Interventions for treating persistent and intractable hiccups in adults                                                                          | Moretto, , EN, Wee, B, Wiffen, PJ; Murchison, AG                                                 | 2013 |
| Treatment for dysphagia (swallowing difficulties) in hereditary ataxia                                                                           | Vogel, , AP, Keage, MJ, Johansson, K; Schalling, E                                               | 2015 |
| Intramuscular versus intravenous anti-D for preventing Rhesus alloimmunization during pregnancy                                                  | Okwundu, , CI; Afolabi, BB                                                                       | 2013 |
| Interventions for reducing medication errors in children in hospital                                                                             | Maaskant, , JM, Vermeulen, H, Apampa, B, Fernando, B, Ghaleb, MA, Neubert, A, Thayyil, S; Soe, A | 2015 |
| Interventions for the reduction of prescribed opioid use in chronic non-cancer pain                                                              | Eccleston, , C, Fisher, E, Thomas, KH, Hearn, L, Derry, S, Stannard, C, Knaggs, R; Moore, RA     | 2017 |
| Interventions for treating mallet finger injuries                                                                                                | Handoll, , HHG; Vaghela, MV                                                                      | 2004 |
| Intracystic bleomycin for cystic craniopharyngiomas in children                                                                                  | Zhang, , S, Fang, Y, Cai, BW, Xu, JG; You, C                                                     | 2016 |
| Intracavity lavage and wound irrigation for prevention of surgical site infection                                                                | Norman, , G, Atkinson, RA, Smith, TA, Rowlands, C, Rithalia, AD, Crosbie, EJ; Dumville, JC       | 2017 |
| Interventions for treating tuberculous pericarditis                                                                                              | Wysong, , CS, Ntsekhe, M, Thabane, L, Volmink, J, Majombozi, D, Gumede, F, Pandie, S; Mayosi, BM | 2017 |
| Interventions to improve inhaler technique for people with asthma                                                                                | Normansell, , R, Kew, KM; Mathioudakis, AG                                                       | 2017 |
| Intravenous antibiotics for pulmonary exacerbations in people with cystic fibrosis                                                               | Hurley, , MN, Prayle, AP; Flume, P                                                               | 2015 |
| Interventions for squamous cell carcinoma of the conjunctiva in HIV-infected individuals                                                         | Gichuhi, , S; Irlam, JH                                                                          | 2013 |
| Interventions for the treatment of decreased bone mineral density associated with HIV infection                                                  | Lin, , D; Rieder, MJ                                                                             | 2007 |
| Interventions to improve professional adherence to guidelines for prevention of device-related infections                                        | Flodgren, , G, Conterno, LO, Mayhew, A, Omar, O, Pereira, CR; Shepperd, S                        | 2013 |
| Interventions for recruiting smokers into cessation programmes                                                                                   | Marcano Belisario, , JS, Bruggeling, MN, Gunn, LH, Brusamento, S; Car, J                         | 2012 |
| Intravenous magnesium sulfate for treating children with acute asthma in the emergency department                                                | Griffiths, , B; Kew, KM                                                                          | 2016 |
| Interventions to enhance adherence to dietary advice for preventing and managing chronic diseases in adults                                      | Desroches, , S, Lapointe, A, Ratté, S, Gravel, K, Légaré, F; Turcotte, S                         | 2013 |

|                                                                                                                                   |                                                                                                                                                               |      |
|-----------------------------------------------------------------------------------------------------------------------------------|---------------------------------------------------------------------------------------------------------------------------------------------------------------|------|
| Interventions for the treatment of oral and oropharyngeal cancers: targeted therapy and immunotherapy                             | Chan, , KKW, Glenny, AM, Weldon, JC, Furness, S, Worthington, HV; Wakeford, H                                                                                 | 2015 |
| Interventions for tobacco use prevention in Indigenous youth                                                                      | Carson, , KV, Brinn, MP, Labiszewski, NA, Peters, M, Chang, AB, Veale, A, Esterman, AJ; Smith, BJ                                                             | 2012 |
| Intravenous immunoglobulin as adjuvant therapy for Wegener's granulomatosis                                                       | Fortin, , PM, Tejani, AM, Bassett, K; Musini, VM                                                                                                              | 2013 |
| Interventions to slow progression of myopia in children                                                                           | Walline, , JJ, Lindsley, K, Vedula, SS, Cotter, SA, Mutti, DO; Twelker, JD                                                                                    | 2011 |
| Intravenous immunoglobulin for the treatment of Kawasaki disease in children                                                      | Oates-Whitehead, , RM, Baumer, JH, Haines, L, Love, S, Maconochie, IK, Gupta, A, Roman, K, Dua, JS; Flynn, I                                                  | 2003 |
| Interventions for vaginismus                                                                                                      | Melnik, , T, Hawton, K; McGuire, H                                                                                                                            | 2012 |
| Interventions to improve adherence to antiretroviral therapy in children with HIV infection                                       | Bain-Brickley, , D, Butler, LM, Kennedy, GE; Rutherford, GW                                                                                                   | 2011 |
| Interventions to improve antibiotic prescribing practices for hospital inpatients                                                 | Davey, , P, Marwick, CA, Scott, CL, Charani, E, McNeil, K, Brown, E, Gould, IM, Ramsay, CR; Michie, S                                                         | 2017 |
| Interventions for treating painful sickle cell crisis during pregnancy                                                            | Martí-Carvajal, , AJ, Peña-Martí, GE, Comunián-Carrasco, G; Martí-Peña, AJ                                                                                    | 2009 |
| Interventions for the prevention of nutritional rickets in term born children                                                     | Lerch, , C; Meissner, T                                                                                                                                       | 2007 |
| Interventions for tobacco use cessation in people in treatment for or recovery from substance use disorders                       | Apollonio, , D, Philipps, R; Bero, L                                                                                                                          | 2016 |
| Interventions for the treatment of fractures of the mandibular condyle                                                            | Sharif, , MO, Fedorowicz, Z, Drews, P, Nasser, M, Dorri, M, Newton, T; Oliver, R                                                                              | 2010 |
| Interventions for the prevention and management of oropharyngeal candidiasis associated with HIV infection in adults and children | Pienaar, , ED, Young, T; Holmes, H                                                                                                                            | 2010 |
| Interventions to modify sexual risk behaviours for preventing HIV in homeless youth                                               | Naranbhai, , V, Abdool Karim, Q; Meyer-Weitz, A                                                                                                               | 2011 |
| Interventions to improve safe and effective medicines use by consumers: an overview of systematic reviews                         | Ryan, , R, Santesso, N, Lowe, D, Hill, S, Grimshaw, JM, Pictor, M, Kaufman, C, Cowie, G; Taylor, M                                                            | 2014 |
| Interventions to facilitate shared decision making to address antibiotic use for acute respiratory infections in primary care     | Coxeter, , P, Del Mar, CB, McGregor, L, Beller, EM; Hoffmann, TC                                                                                              | 2015 |
| Interventions for the restorative care of amelogenesis imperfecta in children and adolescents                                     | Dashash, , M, Yeung, CA, Jamous, I; Blinkhorn, A                                                                                                              | 2013 |
| Intranasal corticosteroids for asthma control in people with coexisting asthma and rhinitis                                       | Taramarcz, , P; Gibson, PG                                                                                                                                    | 2003 |
| Interventions for the management of dry mouth: topical therapies                                                                  | Furness, , S, Worthington, HV, Bryan, G, Birchenough, S; McMillan, R                                                                                          | 2011 |
| Intravenous immunoglobulin for chronic inflammatory demyelinating polyradiculoneuropathy                                          | Eftimov, , F, Winer, JB, Vermeulen, M, de Haan, R; van Schaik, IN                                                                                             | 2013 |
| Interventions for treating psoriatic arthritis                                                                                    | Jones, , G, Crotty, M; Brooks, P                                                                                                                              | 2000 |
| Interventions for treating postpartum constipation                                                                                | Turawa, , EB, Musekiwa, A; Rohwer, AC                                                                                                                         | 2014 |
| Interventions to improve outpatient referrals from primary care to secondary care                                                 | Akbari, , A, Mayhew, A, Al-Alawi, MA, Grimshaw, J, Winkens, R, Glidewell, E, Pritchard, C, Thomas, R; Fraser, C                                               | 2008 |
| Intravenous magnesium sulfate for treating adults with acute asthma in the emergency department                                   | Kew, , KM, Kirtchuk, L; Michell, CI                                                                                                                           | 2014 |
| Intravenous or intramuscular parecoxib for acute postoperative pain in adults                                                     | Lloyd, , R, Derry, S, Moore, RA; McQuay, HJ                                                                                                                   | 2009 |
| Interventions for raising breast cancer awareness in women                                                                        | O'Mahony, , M, Comber, H, Fitzgerald, T, Corrigan, MA, Fitzgerald, E, Grunfeld, EA, Flynn, MG; Hegarty, J                                                     | 2017 |
| Interventions for treating collagenous colitis                                                                                    | Kafil, , TS, Nguyen, TM, Patton, PH, MacDonald, JK, Chande, N; McDonald, JWD                                                                                  | 2017 |
| Interventions for sensory impairment in the upper limb after stroke                                                               | Doyle, , S, Bennett, S, Fasoli, SE; McKenna, KT                                                                                                               | 2010 |
| Interventions for the management of oral ulcers in Behçet's disease                                                               | Taylor, , J, Glenny, AM, Walsh, T, Brocklehurst, P, Riley, P, Gorodkin, R; Pemberton, MN                                                                      | 2014 |
| Interventions to reduce ambient particulate matter air pollution and their effect on health                                       | Burns, , J, Boogaard, H, Polus, S, Pfadenhauer, LM, Rohwer, AC, van Erp, AM, Turley, R; Rehfuess, E                                                           | 2019 |
| Interventions to promote informed consent for patients undergoing surgical and other invasive healthcare procedures               | Kinnersley, , P, Phillips, K, Savage, K, Kelly, MJ, Farrell, E, Morgan, B, Whistance, R, Lewis, V, Mann, MK, Stephens, BL, Blazeby, J, Elwyn, G; Edwards, AGK | 2013 |
| Intravenous magnesium for acute myocardial infarction                                                                             | Li, , J, Zhang, Q, Zhang, M; Egger, M                                                                                                                         | 2007 |
| Interventions for the management of fatigue in adults with a primary brain tumour                                                 | Day, , J, Yust-Katz, S, Cachia, D, Wefel, J, Katz, LH, Tremont Lukats, IW, Bulbeck, H, Armstrong, T; Rooney, AG                                               | 2016 |
| Intravenous immunoglobulin for myasthenia gravis                                                                                  | Gajdos, , P, Chevret, S; Toyka, KV                                                                                                                            | 2012 |
| Interventions for treating cholestasis in pregnancy                                                                               | Gurung, , V, Stokes, M, Middleton, P, Milan, SJ, Hague, W; Thornton, JG                                                                                       | 2013 |
| Interventions to reduce waiting times for elective procedures                                                                     | Ballini, , L, Negro, A, Maltoni, S, Vignatelli, L, Flodgren, G, Simera, I, Holmes, J; Grilli, R                                                               | 2015 |
| Intranasal steroids versus placebo or no intervention for chronic rhinosinusitis                                                  | Chong, , LY, Head, K, Hopkins, C, Philpott, C, Schilder, AGM; Burton, MJ                                                                                      | 2016 |
| Intratympanic gentamicin for Ménière's disease or syndrome                                                                        | Pullens, , B; van Benthem, PP                                                                                                                                 | 2011 |
| Intranasal ipratropium bromide for the common cold                                                                                | AlBalawi, , ZH, Othman, SS; AlFaleh, K                                                                                                                        | 2013 |

|                                                                                                                                                       |                                                                                                                         |      |
|-------------------------------------------------------------------------------------------------------------------------------------------------------|-------------------------------------------------------------------------------------------------------------------------|------|
| Interventions for tobacco use cessation in people living with HIV and AIDS                                                                            | Pool, , ERM, Dogar, O, Lindsay, RP, Weatherburn, P; Siddiqi, K                                                          | 2016 |
| Interventions for treating acute elbow dislocations in adults                                                                                         | Taylor, , F, Sims, M, Theis, JC; Herbison, GP                                                                           | 2012 |
| Interventions for replacing missing teeth: augmentation procedures of the maxillary sinus                                                             | Esposito, , M, Felice, P; Worthington, HV                                                                               | 2014 |
| Interventions for renal vasculitis in adults                                                                                                          | Walters, , G, Willis, NS; Craig, JC                                                                                     | 2015 |
| Interventions for trichomoniasis in pregnancy                                                                                                         | Gülmezoglu, , AM; Azhar, M                                                                                              | 2011 |
| Interventions other than anticoagulants and systemic antibiotics for prevention of central venous catheter-related infections in children with cancer | Arora, , RS, Roberts, R, Eden, TOB; Pizer, B                                                                            | 2010 |
| Intraoperative Mitomycin C for glaucoma surgery                                                                                                       | Wilkins, , M, Indar, A; Wormald, R                                                                                      | 2005 |
| Interventions for strabismic amblyopia                                                                                                                | Taylor, , K; Elliott, S                                                                                                 | 2014 |
| Interventions for treating anxiety after stroke                                                                                                       | Knapp, , P, Campbell Burton, CA, Holmes, J, Murray, J, Gillespie, D, Lightbody, CE, Watkins, CL, Chun, HYY; Lewis, SR   | 2017 |
| Intramedullary nailing for tibial shaft fractures in adults                                                                                           | Duan, , X, Al-Qwbani, M, Zeng, Y, Zhang, W; Xiang, Z                                                                    | 2012 |
| Interventions for the treatment of Frey's syndrome                                                                                                    | Li, , C, Wu, F, Zhang, Q, Gao, Q, Shi, Z; Li, L                                                                         | 2015 |
| Interventions to facilitate return to work in adults with adjustment disorders                                                                        | Arends, , I, Bruinvels, DJ, Rebergen, DS, Nieuwenhuijsen, K, Madan, I, Neumeyer-Gromen, A, Bültmann, U; Verbeek, JH     | 2012 |
| Intravenous naftidrofuryl for critical limb ischaemia                                                                                                 | Smith, , FB, Bradbury, A; Fowkes, G                                                                                     | 2012 |
| Interventions to reduce acute and late adverse gastrointestinal effects of pelvic radiotherapy for primary pelvic cancers                             | Lawrie, , TA, Green, JT, Beresford, M, Wedlake, L, Burden, S, Davidson, SE, Lal, S, Henson, CC; Andreyev, HJN           | 2018 |
| Interventions for the prevention of recurrent erysipelas and cellulitis                                                                               | Dalal, , A, Eskin-Schwartz, M, Mimouni, D, Ray, S, Days, W, Hodak, E, Leibovici, L; Paul, M                             | 2017 |
| Interventions to improve adherence to lipid-lowering medication                                                                                       | van Driel, , ML, Morledge, MD, Ulep, R, Shaffer, JP, Davies, P; Deichmann, R                                            | 2016 |
| Interventions for the prevention and treatment of pes cavus                                                                                           | Burns, , J, Landorf, KB, Ryan, MM, Crosbie, J; Ouvrier, RA                                                              | 2007 |
| Interventions for treating genital chlamydia trachomatis infection in pregnancy                                                                       | Brocklehurst, , P; Rooney, G                                                                                            | 1998 |
| Interventions for recurrent idiopathic epistaxis (nosebleeds) in children                                                                             | Qureishi, , A; Burton, MJ                                                                                               | 2012 |
| Interventions for treating fractures of the distal femur in adults                                                                                    | Griffin, , XL, Parsons, N, Zbaeda, MM; McArthur, J                                                                      | 2015 |
| Interventions for smoking cessation in hospitalised patients                                                                                          | Rigotti, , NA, Clair, C, Munafò, MR; Stead, LF                                                                          | 2012 |
| Interventions to prevent injuries in construction workers                                                                                             | van der Molen, , HF, Basnet, P, Hoonakker, PLT, Lehtola, MM, Lappalainen, J, Frings-Dresen, MHW, Haslam, R; Verbeek, JH | 2018 |
| Interventions for the physical aspects of sexual dysfunction in women following pelvic radiotherapy                                                   | Denton, , AS; Maher, J                                                                                                  | 2003 |
| Interventions for weight reduction in obesity to improve survival in women with endometrial cancer                                                    | Kitson, , S, Ryan, N, MacKintosh, ML, Edmondson, R, Duffy, JMN; Crosbie, EJ                                             | 2018 |
| Interventions to prevent hypothermia at birth in preterm and/or low birth weight infants                                                              | McCall, , EM, Alderdice, F, Halliday, HL, Vohra, S; Johnston, L                                                         | 2018 |
| Interventions to improve hand hygiene compliance in patient care                                                                                      | Gould, , DJ, Moralejo, D, Drey, N, Chudleigh, JH; Taljaard, M                                                           | 2017 |
| Interventions for treating genital Chlamydia trachomatis infection in pregnancy                                                                       | Cluver, , C, Novikova, N, Eriksson, DOA, Bengtsson, K; Lingman, GK                                                      | 2017 |
| Intravenous immunoglobulins for multiple sclerosis                                                                                                    | Gray, , O, McDonnell, GV; Forbes, RB                                                                                    | 2003 |
| Intravenous immunoglobulin for presumed viral myocarditis in children and adults                                                                      | Robinson, , J, Hartling, L, Vandermeer, B; Klassen, TP                                                                  | 2015 |
| Interventions for treating post-extraction bleeding                                                                                                   | Kumbargere Nagraj, , S, Prashanti, E, Aggarwal, H, Lingappa, A, Muthu, MS, Kiran Kumar Krishanappa, S; Hassan, H        | 2018 |
| Interventions for replacing missing teeth: antibiotics at dental implant placement to prevent complications                                           | Esposito, , M, Grusovin, MG; Worthington, HV                                                                            | 2013 |
| Intramuscular penicillin for the prevention of early onset group B streptococcal infection in newborn infants                                         | Woodgate, , PG, Flenady, V; Steer, PA                                                                                   | 2004 |
| Interventions for treating painful nipples among breastfeeding women                                                                                  | Dennis, , CL, Jackson, K; Watson, J                                                                                     | 2014 |
| Intralesional treatment versus wide resection for central low-grade chondrosarcoma of the long bones                                                  | Dierselhuis, , EF, Goulding, KA, Stevens, M; Jutte, PC                                                                  | 2019 |
| Intratracheal Clara cell secretory protein (CCSP) administration in preterm infants with or at risk of respiratory distress syndrome                  | Abdel-Latif, , ME; Osborn, DA                                                                                           | 2011 |
| Interventions for treating peripartum cardiomyopathy to improve outcomes for women and babies                                                         | Carlin, , AJ, Alfirevic, Z; Gyte, GML                                                                                   | 2010 |
| Intramuscular versus oral corticosteroids to reduce relapses following discharge from the emergency department for acute asthma                       | Kirkland, , SW, Cross, E, Campbell, S, Villa-Roel, C; Rowe, BH                                                          | 2018 |
| Interventions for treating burning mouth syndrome                                                                                                     | McMillan, , R, Forssell, H, Buchanan, JAG, Glenny, AM, Weldon, JC; Zakrzewska, JM                                       | 2016 |
| Interventions for replacing missing teeth: hyperbaric oxygen therapy for irradiated patients who require dental implants                              | Esposito, , M; Worthington, HV                                                                                          | 2013 |

|                                                                                                                                                                               |                                                                                                                               |      |
|-------------------------------------------------------------------------------------------------------------------------------------------------------------------------------|-------------------------------------------------------------------------------------------------------------------------------|------|
| Intraoperative use of low volume ventilation to decrease postoperative mortality, mechanical ventilation, lengths of stay and lung injury in adults without acute lung injury | Guay, , J, Ochroch, EA; Kopp, S                                                                                               | 2018 |
| Interventions for treating leg ulcers in people with sickle cell disease                                                                                                      | Marti-Carvajal, , AJ, Knight-Madden, JM; Martinez-Zapata, MJ                                                                  | 2014 |
| Interventions to reduce risky sexual behaviour for preventing HIV infection in workers in occupational settings                                                               | Ojo, , O, Verbeek, JH, Rasanen, K, Heikkinen, J, Isotalo, LK, Mngoma, N; Ruotsalainen, E                                      | 2011 |
| Intravenous or enteral loop diuretics for preterm infants with (or developing) chronic lung disease                                                                           | Stewart, , A; Brion, LP                                                                                                       | 2011 |
| Intravenous fluids for abdominal aortic surgery                                                                                                                               | Toomtong, , P; Suksompong, S                                                                                                  | 2010 |
| Interventions to improve disposal of human excreta for preventing diarrhoea                                                                                                   | Clasen, , TF, Bostoen, K, Schmidt, WP, Boisson, S, Fung, ICH, Jenkins, MW, Scott, B, Sugden, S; Cairncross, S                 | 2010 |
| Interventions for unilateral and bilateral refractive amblyopia                                                                                                               | Taylor, , K, Powell, C, Hatt, SR; Stewart, C                                                                                  | 2012 |
| Interventions to improve question formulation in professional practice and self-directed learning                                                                             | Horsley, , T, O'Neill, J, McGowan, J, Perrier, L, Kane, G; Campbell, C                                                        | 2010 |
| Interventions for treating intrahepatic cholestasis in people with sickle cell disease                                                                                        | Marti-Carvajal, , AJ; Marti-Amarista, CE                                                                                      | 2017 |
| Interventions for the treatment of metastatic extradural spinal cord compression in adults                                                                                    | George, , R, Sundararaj, JJ, Govindaraj, R, Chacko, AG; Tharyan, P                                                            | 2015 |
| Interventions for the management of dry mouth: non-pharmacological interventions                                                                                              | Furness, , S, Bryan, G, McMillan, R, Birchenough, S; Worthington, HV                                                          | 2013 |
| Interventions for treating oro-antral communications and fistulae due to dental procedures                                                                                    | Kiran Kumar Krishanappa, , S, Eachempati, P, Kumbargere Nagraj, S, Shetty, NY, Moe, S, Aggarwal, H; Mathew, RJ                | 2018 |
| Intravascular brachytherapy for peripheral vascular disease                                                                                                                   | Andras, , A, Hansrani, M, Stewart, M; Stansby, G                                                                              | 2014 |
| Interventions for smoking cessation in people diagnosed with lung cancer                                                                                                      | Zeng, , L, Yu, X, Yu, T, Xiao, J; Huang, Y                                                                                    | 2019 |
| Intrauterine administration of human chorionic gonadotropin (hCG) for subfertile women undergoing assisted reproduction                                                       | Craciunas, , L, Tsampras, N, Raine-Fenning, N; Coomarasamy, A                                                                 | 2018 |
| Interventions for treating fingertip entrapment injuries in children                                                                                                          | Capstick, , R; Giele, H                                                                                                       | 2014 |
| Interventions to reduce weight gain in schizophrenia                                                                                                                          | Faulkner, , G, Cohn, T; Remington, G                                                                                          | 2007 |
| Interventions for women with endometrioma prior to assisted reproductive technology                                                                                           | Benschop, , L, Farquhar, C, van der Poel, N; Heineman, MJ                                                                     | 2010 |
| Interventions targeted at women to encourage the uptake of cervical screening                                                                                                 | Everett, , T, Bryant, A, Griffin, MF, Martin-Hirsch, PPL, Forbes, CA; Jepson, RG                                              | 2011 |
| Interventions for restoring patency of occluded central venous catheter lumens                                                                                                | van Miert, , C, Hill, R; Jones, L                                                                                             | 2012 |
| Intraoperative neuromonitoring versus visual nerve identification for prevention of recurrent laryngeal nerve injury in adults undergoing thyroid surgery                     | Cirotchi, , R, Arezzo, A, D'Andrea, V, Abraha, I, Popivanov, GI, Avenia, N, Gerardi, C, Henry, BM, Randolph, J; Barczyński, M | 2019 |
| Interventions to help support caregivers of people with a brain or spinal cord tumour                                                                                         | Boele, , FW, Rooney, AG, Bulbeck, H; Sherwood, P                                                                              | 2019 |
| Interventions for tobacco cessation in the dental setting                                                                                                                     | Carr, , AB; Ebbert, J                                                                                                         | 2012 |
| Intranasal steroids for acute sinusitis                                                                                                                                       | Zalmanovici Trestioreanu, , A; Yaphe, J                                                                                       | 2013 |
| Interventions for the eradication of meticillin-resistant Staphylococcus aureus (MRSA) in people with cystic fibrosis                                                         | Lo, , DKH, Muhlebach, MS; Smyth, AR                                                                                           | 2018 |
| Interventions for reducing inflammation in familial Mediterranean fever                                                                                                       | Wu, , B, Xu, T, Li, Y; Yin, X                                                                                                 | 2018 |
| Interventions in the alcohol server setting for preventing injuries                                                                                                           | Ker, , K; Chinnock, P                                                                                                         | 2008 |
| Interventions to reduce harm from continued tobacco use                                                                                                                       | Lindson-Hawley, , N, Hartmann-Boyce, J, Fanshawe, TR, Begh, R, Farley, A; Lancaster, T                                        | 2016 |
| Interventions for treating acute bleeding episodes in people with acquired hemophilia A                                                                                       | Zeng, , Y, Zhou, R, Duan, X, Long, D; Yang, S                                                                                 | 2014 |
| Interventions for tophi in gout                                                                                                                                               | Sriranganathan, , MK, Vinik, O, Bombardier, C; Edwards, CJ                                                                    | 2014 |
| Interventions for reducing the risk of mother-to-child transmission of HIV infection                                                                                          | Brocklehurst, P                                                                                                               | 2002 |
| Interventions to increase clinical incident reporting in health care                                                                                                          | Parmelli, , E, Flodgren, G, Fraser, SG, Williams, N, Rubin, G; Eccles, MP                                                     | 2012 |
| Intravenous immunoglobulin for preventing infection in preterm and/or low birth weight infants                                                                                | Ohlsson, , A; Lacy, JB                                                                                                        | 2013 |
| Intramuscular versus intravenous prophylactic oxytocin for the third stage of labour                                                                                          | Oladapo, , OT, Okusanya, BO; Abalos, E                                                                                        | 2018 |
| Interventions to reduce corruption in the health sector                                                                                                                       | Gaitonde, , R, Oxman, AD, Okebukola, PO; Rada, G                                                                              | 2016 |
| Interventions for treatment of neonatal hyperglycemia in very low birth weight infants                                                                                        | Bottino, , M, Cowett, RM; Sinclair, JC                                                                                        | 2011 |
| Interventions to improve the management of diabetes mellitus in primary care, outpatient and community settings                                                               | Renders, , CM, Valk, GD, Griffin, SJ, Wagner, E, van Eijk, JT; Assendelft, WJJ                                                | 2000 |
| Intravenous immunoglobulins for epilepsy                                                                                                                                      | Geng, , J, Dong, J, Li, Y, Ni, H, Jiang, K, Shi, LL; Wang, G                                                                  | 2017 |
| Interventions to improve the appropriate use of polypharmacy for older people                                                                                                 | Rankin, , A, Cadogan, CA, Patterson, SM, Kerse, N, Cardwell, CR, Bradley, MC, Ryan, C; Hughes, C                              | 2018 |

|                                                                                                                                                                                                               |                                                                                                                                                                  |      |
|---------------------------------------------------------------------------------------------------------------------------------------------------------------------------------------------------------------|------------------------------------------------------------------------------------------------------------------------------------------------------------------|------|
| Interventions using social networking sites to promote contraception in women of reproductive age                                                                                                             | Jawad, , A, Jawad, I; Alwan, NA                                                                                                                                  | 2019 |
| Intravenous beta2-agonists versus intravenous aminophylline for acute asthma                                                                                                                                  | Travers, , AH, Jones, AP, Camargo Jr, CA, Milan, SJ; Rowe, BH                                                                                                    | 2012 |
| Interventions to increase adherence to medications for tobacco dependence                                                                                                                                     | Hollands, , GJ, Naughton, F, Farley, A, Lindson, N; Aveyard, P                                                                                                   | 2019 |
| Interventions for treating neuropathic pain in people with sickle cell disease                                                                                                                                | Asnani, , MR, Francis, DK, Brandow, AM, Hammond Gabbadon, CEO; Ali, A                                                                                            | 2019 |
| Interventions to support return to work for people with coronary heart disease                                                                                                                                | Hegewald, , J, Wegewitz, UE, Euler, U, van Dijk, JL, Adams, J, Fishta, A, Heinrich, P; Seidler, A                                                                | 2019 |
| Interventions for treating acute high altitude illness                                                                                                                                                        | Simancas-Racines, , D, Arevalo-Rodriguez, I, Osorio, D, Franco, JVA, Xu, Y; Hidalgo, R                                                                           | 2018 |
| Omega-3 fatty acids for the primary and secondary prevention of cardiovascular disease                                                                                                                        | Abdelhamid, , AS, Brown, TJ, Brainard, JS, Biswas, P, Thorpe, GC, Moore, HJ, Deane, KHO, AlAbdulghafoor, FK, Summerbell, CD, Worthington, HV, Song, F; Hooper, L | 2018 |
| Optimum duration of regimens for Helicobacter pylori eradication                                                                                                                                              | Yuan, , Y, Ford, AC, Khan, KJ, Gisbert, JP, Forman, D, Leontiadis, GI, Tse, F, Calvet, X, Fallone, C, Fischbach, L, Oderda, G, Bazzoli, F; Moayyedi, P           | 2013 |
| Non-steroidal anti-inflammatory drugs versus corticosteroids for controlling inflammation after uncomplicated cataract surgery                                                                                | Juthani, , VV, Clearfield, E; Chuck, RS                                                                                                                          | 2017 |
| Naftopidil for the treatment of lower urinary tract symptoms compatible with benign prostatic hyperplasia                                                                                                     | Hwang, , EC, Gandhi, S, Jung, JH, Imamura, M, Kim, MH, Pang, R; Dahm, P                                                                                          | 2018 |
| Non-invasive ventilation during exercise training for people with chronic obstructive pulmonary disease                                                                                                       | Menadue, , C, Piper, AJ, van 't Hul, AJ; Wong, KK                                                                                                                | 2014 |
| Omega-3 fatty acids for cystic fibrosis                                                                                                                                                                       | Oliver, , C; Watson, H                                                                                                                                           | 2016 |
| Nicotine for Alzheimer's disease                                                                                                                                                                              | López-Arrieta, , J; Sanz, FJFS                                                                                                                                   | 2001 |
| Nutrient-enriched formula milk versus human breast milk for preterm infants following hospital discharge                                                                                                      | Henderson, , G, Fahey, T; McGuire, W                                                                                                                             | 2007 |
| Non surgical therapy for anal fissure                                                                                                                                                                         | Nelson, , RL, Thomas, K, Morgan, J; Jones, A                                                                                                                     | 2012 |
| Neoadjuvant chemotherapy for locally advanced cervix cancer                                                                                                                                                   | Tierney, , J; Rydzewska, L                                                                                                                                       | 2004 |
| Omalizumab for asthma in adults and children                                                                                                                                                                  | Normansell, , R, Walker, S, Milan, SJ, Walters, EH; Nair, P                                                                                                      | 2014 |
| One-to-one dietary interventions undertaken in a dental setting to change dietary behaviour                                                                                                                   | Harris, , R, Gamboa, A, Dailey, Y; Ashcroft, A                                                                                                                   | 2012 |
| Non-steroidal anti-inflammatory agents to induce regression and prevent the progression of cervical intraepithelial neoplasia                                                                                 | Grabosch, , SM, Shariff, OM; Helm, CW                                                                                                                            | 2018 |
| Nutritional supplementation for hip fracture aftercare in older people                                                                                                                                        | Avenell, , A, Smith, TO, Curtain, JP, Mak, JCS; Myint, PK                                                                                                        | 2016 |
| Opioids for acute pancreatitis pain                                                                                                                                                                           | Basurto Ona, , X, Rigau Comas, D; Urrútia, G                                                                                                                     | 2013 |
| One dose per day compared to multiple doses per day of gentamicin for treatment of suspected or proven sepsis in neonates                                                                                     | Rao, , SC, Srinivasjois, R; Moon, K                                                                                                                              | 2016 |
| Non-pharmacological interventions for fatigue in rheumatoid arthritis                                                                                                                                         | Cramp, , F, Hewlett, S, Almeida, C, Kirwan, JR, Choy, EHS, Chalder, T, Pollock, J; Christensen, R                                                                | 2013 |
| Optimisation of chemotherapy and radiotherapy for untreated Hodgkin lymphoma patients with respect to second malignant neoplasms, overall and progression-free survival: individual participant data analysis | Franklin, , J, Eichenauer, DA, Becker, I, Monsef, I; Engert, A                                                                                                   | 2017 |
| Mycophenolic acid versus azathioprine as primary immunosuppression for kidney transplant recipients                                                                                                           | Wagner, , M, Earley, AK, Webster, AC, Schmid, CH, Balk, EM; Uhlig, K                                                                                             | 2015 |
| Non-pharmacological interventions for chronic pain in people with spinal cord injury                                                                                                                          | Boldt, , I, Eriks-Hoogland, I, Brinkhof, MWG, de Bie, R, Joggi, D; von Elm, E                                                                                    | 2014 |
| Nicotine for schizophrenia                                                                                                                                                                                    | Punnoose, , S; Belgamwar, MR                                                                                                                                     | 2006 |
| Occupational therapy for rheumatoid arthritis                                                                                                                                                                 | Steultjens, , EEMJ, Dekker, JJ, Bouter, LM, Schaardenburg, DD, Kuyk, MAMAH; Van den Ende, ECHM                                                                   | 2004 |
| Nutritional support for acute kidney injury                                                                                                                                                                   | Li, , Y, Tang, X, Zhang, J; Wu, T                                                                                                                                | 2012 |
| On-site mental health workers delivering psychological therapy and psychosocial interventions to patients in primary care: effects on the professional practice of primary care providers                     | Harkness, , EF; Bower, PJ                                                                                                                                        | 2009 |
| Nutritional support in children and young people with cancer undergoing chemotherapy                                                                                                                          | Ward, , EJ, Henry, LM, Friend, AJ, Wilkins, S; Phillips, RS                                                                                                      | 2015 |
| Opioid antagonists for alcohol dependence                                                                                                                                                                     | Rösner, , S, Hackl-Herrwerth, A, Leucht, S, Vecchi, S, Srisurapanont, M; Soyka, M                                                                                | 2010 |
| Non-steroid agents for idiopathic pulmonary fibrosis                                                                                                                                                          | Spagnolo, , P, Del Giovane, C, Luppi, F, Cerri, S, Balduzzi, S, Walters, EH, D'Amico, R; Richeldi, L                                                             | 2010 |
| Non-pharmaceutical management of respiratory morbidity in children with severe global developmental delay                                                                                                     | Winfield, , NR, Barker, NJ, Turner, ER; Quin, GL                                                                                                                 | 2014 |
| Nutritional advice for improving outcomes in multiple pregnancies                                                                                                                                             | Bricker, , L, Reed, K, Wood, L; Neilson, JP                                                                                                                      | 2015 |
| Neonatal vitamin A supplementation for the prevention of mortality and morbidity in term neonates in low and middle income countries                                                                          | Haider, , BA, Sharma, R; Bhutta, ZA                                                                                                                              | 2017 |
| Non pharmacological interventions for spasticity in multiple sclerosis                                                                                                                                        | Amatya, , B, Khan, F, La Mantia, L, Demetrios, M; Wade, DT                                                                                                       | 2013 |

|                                                                                                                                                                 |                                                                                                                      |      |
|-----------------------------------------------------------------------------------------------------------------------------------------------------------------|----------------------------------------------------------------------------------------------------------------------|------|
| Notification and support for people exposed to the risk of Creutzfeldt-Jakob disease (CJD) (or other prion diseases) through medical treatment (iatrogenically) | Ryan, , R, Hill, S, Lowe, D, Allen, K, Taylor, M; Mead, C                                                            | 2011 |
| Nimodipine for primary degenerative, mixed and vascular dementia                                                                                                | Birks, , J; López-Arrieta, J                                                                                         | 2002 |
| Narrow-band ultraviolet B phototherapy versus broad-band ultraviolet B or psoralen-ultraviolet A photochemotherapy for psoriasis                                | Chen, , X, Yang, M, Cheng, Y, Liu, GJ; Zhang, M                                                                      | 2013 |
| Non-steroidal anti-inflammatory drugs for sciatica                                                                                                              | Rasmussen-Barr, , E, Held, U, Grooten, WJA, Roelofs, PDDM, Koes, BW, van Tulder, MW; Wertli, MM                      | 2016 |
| Non-surgical interventions for treating heavy menstrual bleeding (menorrhagia) in women with bleeding disorders                                                 | Ray, , S; Ray, A                                                                                                     | 2016 |
| Non-opioid drugs for pain management in labour                                                                                                                  | Othman, , M, Jones, L; Neilson, JP                                                                                   | 2012 |
| Optimal time for initiating antiretroviral therapy (ART) in HIV-infected, treatment-naïve children aged 2 to 5 years old                                        | Siegfried, , N, Davies, MA, Penazzato, M, Muhe, LM; Egger, M                                                         | 2013 |
| Non steroidal anti-inflammatory drugs (NSAID) and aspirin for preventing colorectal adenomas and carcinomas                                                     | Asano, , TK; McLeod, RS                                                                                              | 2004 |
| Optimisation of antiretroviral therapy in HIV-infected children under 3 years of age                                                                            | Penazzato, , M, Prendergast, AJ, Muhe, LM, Tindyebwa, D; Abrams, E                                                   | 2014 |
| Nicotine receptor partial agonists for smoking cessation                                                                                                        | Cahill, , K, Lindson-Hawley, N, Thomas, KH, Fanshawe, TR; Lancaster, T                                               | 2016 |
| Optimal primary surgical treatment for advanced epithelial ovarian cancer                                                                                       | Elattar, , A, Bryant, A, Winter-Roach, BA, Hatem, M; Naik, R                                                         | 2011 |
| Nicotine vaccines for smoking cessation                                                                                                                         | Hartmann-Boyce, , J, Cahill, K, Hatsukami, D; Cornuz, J                                                              | 2012 |
| Opioids for agitation in dementia                                                                                                                               | Brown, , R, Howard, R, Candy, B; Sampson, EL                                                                         | 2015 |
| Opioid therapy for treating rheumatoid arthritis pain                                                                                                           | Whittle, , SL, Richards, BL, Husni, E; Buchbinder, R                                                                 | 2011 |
| Neonatal screening for sickle cell disease                                                                                                                      | Lees, , C, Davies, SC; Dezateux, C                                                                                   | 2000 |
| Nutritional interventions for preventing and treating pressure ulcers                                                                                           | Langer, , G; Fink, A                                                                                                 | 2014 |
| Opioid antagonists under heavy sedation or anaesthesia for opioid withdrawal                                                                                    | Gowing, , L, Ali, R; White, JM                                                                                       | 2010 |
| Neuromuscular electrostimulation for adults with chronic obstructive pulmonary disease                                                                          | Hill, , K, Cavalheri, V, Mathur, S, Roig, M, Janaudis-Ferreira, T, Robles, P, Dolmage, TE; Goldstein, R              | 2018 |
| Non-penetrating filtration surgery versus trabeculectomy for open-angle glaucoma                                                                                | Eldaly, , MA, Bunce, C, ElSheikha, OZ; Wormald, R                                                                    | 2014 |
| Non-contraceptive oestrogen-containing preparations for controlling symptoms of premenstrual syndrome                                                           | Naheed, , B, Kuiper, JH, Uthman, OA, O'Mahony, F; O'Brien, PMS                                                       | 2017 |
| Oestrogen and progestogen hormone replacement therapy for peri-menopausal and post-menopausal women: weight and body fat distribution                           | Kongnyuy, , EJ, Norman, RJ, Flight, IHK; Rees, MC                                                                    | 1999 |
| Nebulised hypertonic saline for cystic fibrosis                                                                                                                 | Wark, , P; McDonald, VM                                                                                              | 2018 |
| Negative pressure wound therapy for treating leg ulcers                                                                                                         | Dumville, , JC, Land, L, Evans, D; Peinemann, F                                                                      | 2015 |
| Neuromodulators for pain management in rheumatoid arthritis                                                                                                     | Richards, , BL, Whittle, SL; Buchbinder, R                                                                           | 2012 |
| Nutritional interventions for preventing stunting in children (birth to 59 months) living in urban slums in low- and middle-income countries (LMIC)             | Goudet, , SM, Bogin, BA, Madise, NJ; Griffiths, PL                                                                   | 2019 |
| Natalizumab for induction of remission in Crohn's disease                                                                                                       | Nelson, , SML, Nguyen, TM, McDonald, JWD; MacDonald, JK                                                              | 2018 |
| Niacin for primary and secondary prevention of cardiovascular events                                                                                            | Schandelmaier, , S, Briel, M, Saccilotto, R, Olu, KK, Arpagaus, A, Hemkens, LG; Nordmann, AJ                         | 2017 |
| Non-antipsychotic catecholaminergic drugs for antipsychotic-induced tardive dyskinesia                                                                          | El-Sayeh, , HG, Rathbone, J, Soares-Weiser, K; Bergman, H                                                            | 2018 |
| Nebulised morphine for severe interstitial lung disease                                                                                                         | Polosa, , R, Simidchiev, A; Walters, EH                                                                              | 2002 |
| Nonsteroidal anti-inflammatory drugs for pain in women with endometriosis                                                                                       | Brown, , J, Crawford, TJ, Allen, C, Hopewell, S; Prentice, A                                                         | 2017 |
| Natural cycle in vitro fertilisation (IVF) for subfertile couples                                                                                               | Allersma, , T, Farquhar, C; Cantineau, AEP                                                                           | 2013 |
| Nutritional support for liver disease                                                                                                                           | Koretz, , RL, Avenell, A; Lipman, TO                                                                                 | 2012 |
| Nebuliser systems for drug delivery in cystic fibrosis                                                                                                          | Daniels, , T, Mills, N; Whitaker, P                                                                                  | 2013 |
| Non-surgical interventions for late rectal problems (proctopathy) of radiotherapy in people who have received radiotherapy to the pelvis                        | van de Wetering, , FT, Verleye, L, Andreyev, HJN, Maher, J, Vlayen, J, Pieters, BR, van Tienhoven, G; Scholten, RJPM | 2016 |
| Nutritional interventions for liver-transplanted patients                                                                                                       | Langer, , G, Großmann, K, Fleischer, S, Berg, A, Grothues, D, Wienke, A, Behrens, J; Fink, A                         | 2012 |
| Omega 3 fatty acids (fish oil) for maintenance of remission in ulcerative colitis                                                                               | Turner, , D, Steinhart, AH; Griffiths, AM                                                                            | 2007 |
| Nasal decontamination for the prevention of surgical site infection in Staphylococcus aureus carriers                                                           | Liu, , Z, Norman, G, Iheozor-Ejiofor, Z, Wong, JKF, Crosbie, EJ; Wilson, P                                           | 2017 |
| Omega 3 fatty acid for the prevention of cognitive decline and dementia                                                                                         | Sydenham, , E, Dangour, AD; Lim, WS                                                                                  | 2012 |
| Nonlatex versus latex male condoms for contraception                                                                                                            | Gallo, , MF, Grimes, DA, Lopez, LM; Schulz, KF                                                                       | 2006 |

|                                                                                                                                                                     |                                                                                                                                                                                 |      |
|---------------------------------------------------------------------------------------------------------------------------------------------------------------------|---------------------------------------------------------------------------------------------------------------------------------------------------------------------------------|------|
| Optimal timing for intravascular administration set replacement                                                                                                     | Ullman, , AJ, Cooke, ML, Gillies, D, Marsh, N, Daud, A, McGrail, MR, O'Riordan, E; Rickard, CM                                                                                  | 2013 |
| Nonsteroidal anti-inflammatory drugs (NSAIDs) versus opioids for acute renal colic                                                                                  | Holdgate, , A; Pollock, T                                                                                                                                                       | 2004 |
| Neuraminidase inhibitors for preventing and treating influenza in children (published trials only)                                                                  | Wang, , K, Shun-Shin, M, Gill, P, Perera, R; Harnden, A                                                                                                                         | 2012 |
| Once versus twice daily low molecular weight heparin for the initial treatment of venous thromboembolism                                                            | Bhutia, , S; Wong, PF                                                                                                                                                           | 2013 |
| Opioids for the palliation of refractory breathlessness in adults with advanced disease and terminal illness                                                        | Barnes, , H, McDonald, J, Smallwood, N; Manser, R                                                                                                                               | 2016 |
| Nutritional supplements for people being treated for active tuberculosis                                                                                            | Grobler, , L, Nagpal, S, Sudarsanam, TD; Sinclair, D                                                                                                                            | 2016 |
| Nitric oxide donors for treating preterm labour                                                                                                                     | Duckitt, , K, Thornton, S, O'Donovan, OP; Dowswell, T                                                                                                                           | 2014 |
| Neuromuscular electrical stimulation for muscle weakness in adults with advanced disease                                                                            | Jones, , S, Man, WDC, Gao, W, Higginson, IJ, Wilcock, A; Maddocks, M                                                                                                            | 2016 |
| Non-pharmacological interventions for somatoform disorders and medically unexplained physical symptoms (MUPS) in adults                                             | van Dessel, , N, den Boeft, M, van der Wouden, JC, Kleinstäuber, M, Leone, SS, Terluin, B, Numans, ME, van der Horst, HE; van Marwijk, H                                        | 2014 |
| Newborn screening for cystic fibrosis                                                                                                                               | Southern, , KW, Mérelle, MME, Dankert-Roelse, JE; Nagelkerke, A                                                                                                                 | 2009 |
| Nitazoxanide for chronic hepatitis C                                                                                                                                | Nikolova, , K, Gluud, C, Grevstad, B; Jakobsen, JC                                                                                                                              | 2014 |
| Non-resection versus resection for an asymptomatic primary tumour in patients with unresectable Stage IV colorectal cancer                                          | Cirocchi, , R, Trastulli, S, Abraha, I, Vettoretto, N, Boselli, C, Montedori, A, Parisi, A, Noya, G; Platell, C                                                                 | 2012 |
| Non-nutritive sucking for increasing physiologic stability and nutrition in preterm infants                                                                         | Foster, , JP, Psaila, K; Patterson, T                                                                                                                                           | 2016 |
| Omega 3 fatty acids (fish oil) for maintenance of remission in Crohn's disease                                                                                      | Lev-Tzion, , R, Griffiths, AM, Ledder, O; Turner, D                                                                                                                             | 2014 |
| Omega-3 polyunsaturated fatty acids (PUFA) for type 2 diabetes mellitus                                                                                             | Hartweg, , J, Perera, R, Montori, VM, Dinneen, SF, Neil, AHAWN; Farmer, AJ                                                                                                      | 2008 |
| Nebulised deoxyribonuclease for viral bronchiolitis in children younger than 24 months                                                                              | Enriquez, , A, Chu, IW, Mellis, C; Lin, WY                                                                                                                                      | 2012 |
| Oestrogens for treatment or prevention of pelvic organ prolapse in postmenopausal women                                                                             | Ismail, , SI, Bain, C; Hagen, S                                                                                                                                                 | 2010 |
| Nebulised hypertonic saline solution for acute bronchiolitis in infants                                                                                             | Zhang, , L, Mendoza-Sassi, RA, Wainwright, C; Klassen, TP                                                                                                                       | 2017 |
| Non-immunosuppressive treatment for IgA nephropathy                                                                                                                 | Reid, , S, Cawthon, PM, Craig, JC, Samuels, JA, Molony, DA; Strippoli, GFM                                                                                                      | 2011 |
| Non-steroidal anti-inflammatory drugs for low back pain                                                                                                             | Roelofs, , PDDM, Deyo, RA, Koes, BW, Scholten, RJPM; van Tulder, MW                                                                                                             | 2008 |
| Needle size for vaccination procedures in children and adolescents                                                                                                  | Beirne, , PV, Hennessy, S, Cadogan, SL, Shiely, F, Fitzgerald, T; MacLeod, F                                                                                                    | 2018 |
| Needle syringe programmes and opioid substitution therapy for preventing hepatitis C transmission in people who inject drugs                                        | Platt, , L, Minozzi, S, Reed, J, Vickerman, P, Hagan, H, French, C, Jordan, A, Degenhardt, L, Hope, V, Hutchinson, S, Maher, L, Palmateer, N, Taylor, A, Bruneau, J; Hickman, M | 2017 |
| Nitric oxide for preventing pre-eclampsia and its complications                                                                                                     | Meher, , S; Duley, L                                                                                                                                                            | 2007 |
| Octreotide for the treatment of chylothorax in neonates                                                                                                             | Das, , A; Shah, PS                                                                                                                                                              | 2010 |
| Olanzapine for schizophrenia                                                                                                                                        | Duggan, , L, Fenton, M, Rathbone, J, Dardennes, R, El-Dosoky, A; Indran, S                                                                                                      | 2005 |
| Non-steroidal anti-inflammatory drugs for acute gout                                                                                                                | van Durme, , CMPG, Wechalekar, MD, Buchbinder, R, Schlesinger, N, van der Heijde, D; Landewé, RBM                                                                               | 2014 |
| N-acetylcarnosine (NAC) drops for age-related cataract                                                                                                              | Dubois, , VDJP; Bastawrous, A                                                                                                                                                   | 2017 |
| Off-pump versus on-pump coronary artery bypass grafting for ischaemic heart disease                                                                                 | Møller, , CH, Penninga, L, Wetterslev, J, Steinbrüchel, DA; Gluud, C                                                                                                            | 2012 |
| Omega-3 fatty acids for the treatment of dementia                                                                                                                   | Burckhardt, , M, Herke, M, Wustmann, T, Watzke, S, Langer, G; Fink, A                                                                                                           | 2016 |
| Non-steroidal antiandrogen monotherapy compared with luteinising hormone-releasing hormone agonists or surgical castration monotherapy for advanced prostate cancer | Kunath, , F, Grobe, HR, Rücker, G, Motschall, E, Antes, G, Dahm, P, Wullich, B; Meerpohl, JJ                                                                                    | 2014 |
| Newer generation antidepressants for depressive disorders in children and adolescents                                                                               | Hetrick, , SE, McKenzie, JE, Cox, GR, Simmons, MB; Merry, SN                                                                                                                    | 2012 |
| Nedocromil sodium for chronic asthma in children                                                                                                                    | Sridhar, , AV; McKean, MC                                                                                                                                                       | 2006 |
| Low protein diets for non-diabetic adults with chronic kidney disease                                                                                               | Hahn, , D, Hodson, EM; Fouque, D                                                                                                                                                | 2018 |
| Open general medical wards versus specialist psychiatric units for acute psychoses                                                                                  | Hickling, , FW, Abel, W, Garner, P; Rathbone, J                                                                                                                                 | 2007 |
| Lateral pararectal versus transrectal stoma placement for prevention of parastomal herniation                                                                       | Hardt, , J, Meerpohl, JJ, Metzenhof, MI, Kienle, P, Post, S; Herrle, F                                                                                                          | 2019 |
| Operative procedures for fissure in ano                                                                                                                             | Nelson, , RL, Chattopadhyay, A, Brooks, W, Platt, I, Paavana, T; Earl, S                                                                                                        | 2011 |
| Lactase treated feeds to promote growth and feeding tolerance in preterm infants                                                                                    | Tan-Dy, , CRY; Ohlsson, A                                                                                                                                                       | 2013 |
| Non-pharmacological interventions for caregivers of stroke survivors                                                                                                | Legg, , LA, Quinn, TJ, Mahmood, F, Weir, CJ, Tierney, J, Stott, DJ, Smith, LN; Langhorne, P                                                                                     | 2011 |



|                                                                                                                                                  |                                                                                                                                                                |      |
|--------------------------------------------------------------------------------------------------------------------------------------------------|----------------------------------------------------------------------------------------------------------------------------------------------------------------|------|
| Magnesium for treating sickle cell disease                                                                                                       | Than, , NN, Soe, HHK, Palaniappan, SK, Abas, ABL; De Franceschi, L                                                                                             | 2019 |
| N-acetylcysteine for sepsis and systemic inflammatory response in adults                                                                         | Szakmany, , T, Hauser, B; Radermacher, P                                                                                                                       | 2012 |
| Ischaemic preconditioning for the reduction of renal ischaemia reperfusion injury                                                                | Menting, , TP, Wever, KE, Ozdemir-van Brunschot, DMD, Van der Vliet, DJA, Rovers, MM; Warle, MC                                                                | 2017 |
| Non-pharmacological interventions for preventing secondary vascular events after stroke or transient ischemic attack                             | MacKay-Lyons, , M, Thornton, M, Ruggles, T; Che, M                                                                                                             | 2013 |
| Low molecular weight heparin for prevention of microvascular occlusion in digital replantation                                                   | Chen, , YC, Chi, CC, Chan, FC; Wen, YW                                                                                                                         | 2013 |
| Naftidrofuryl for intermittent claudication                                                                                                      | de Backer, , TLM, Vander Stichele, R, Leher, P; Van Bortel, L                                                                                                  | 2012 |
| Laser photocoagulation for proliferative diabetic retinopathy                                                                                    | Evans, , JR, Michelessi, M; Virgili, G                                                                                                                         | 2014 |
| Noninvasive positive pressure ventilation for acute respiratory failure following upper abdominal surgery                                        | Faria, , DAS, da Silva, EMK, Atallah, AN; Vital, FMR                                                                                                           | 2015 |
| Laser-assisted subepithelial keratectomy (LASEK) versus photorefractive keratectomy (PRK) for correction of myopia                               | Li, , SM, Zhan, S, Li, SY, Peng, XX, Hu, J, Law, HA; Wang, NL                                                                                                  | 2016 |
| Non-steroidal anti-inflammatory agents for treating cystoid macular oedema following cataract surgery                                            | Sivaprasad, , S, Bunce, C; Crosby-Nwaobi, R                                                                                                                    | 2012 |
| Lay health workers in primary and community health care for maternal and child health and the management of infectious diseases                  | Lewin, , S, Munabi-Babigumira, S, Glenton, C, Daniels, K, Bosch-Capblanch, X, van Wyk, BE, Odgaard-Jensen, J, Johansen, M, Aja, GN, Zwarenstein, M; Scheel, IB | 2010 |
| Optimal loading dose of warfarin for the initiation of oral anticoagulation                                                                      | Mahtani, , KR, Heneghan, CJ, Nunan, D, Bankhead, C, Keeling, D, Ward, AM, Harrison, SE, Roberts, NW, Hobbs, FDR; Perera, R                                     | 2012 |
| Long-term pituitary down-regulation before in vitro fertilization (IVF) for women with endometriosis                                             | Sallam, , HN, Garcia-Velasco, JA, Dias, S, Arici, A; Abou-Setta, AM                                                                                            | 2006 |
| Neuroreflexotherapy for non-specific low-back pain                                                                                               | Urrúti, , G, Burton, AK, Morral Fernández, A, Bonfill Cosp, X; Zanoli, G                                                                                       | 2004 |
| Janus kinase-1 and Janus kinase-2 inhibitors for treating myelofibrosis                                                                          | Marti-Carvajal, , AJ, Anand, V; Solà, I                                                                                                                        | 2015 |
| Non-pharmacological interventions for chronic pain in multiple sclerosis                                                                         | Amatya, , B, Young, J; Khan, F                                                                                                                                 | 2018 |
| Laparoscopic versus open liver resection for benign and malignant hepatic lesions in adults                                                      | Rao, , AM; Ahmed, I                                                                                                                                            | 2013 |
| Once-daily versus multiple-daily dosing with intravenous aminoglycosides for cystic fibrosis                                                     | Bhatt, , J, Jahnke, N; Smyth, AR                                                                                                                               | 2019 |
| Intra-articular steroids and splints/rest for children with juvenile idiopathic arthritis and adults with rheumatoid arthritis                   | Wallen, , MM; Gillies, D                                                                                                                                       | 2006 |
| Non-invasive brain stimulation techniques for chronic pain                                                                                       | O'Connell, , NE, Marston, L, Spencer, S, DeSouza, LH; Wand, BM                                                                                                 | 2018 |
| Naftidrofuryl for dementia                                                                                                                       | Lu, , D, Song, H, Hao, Z, Wu, T; McCleery, J                                                                                                                   | 2011 |
| Nutritional interventions for reducing gastrointestinal toxicity in adults undergoing radical pelvic radiotherapy                                | Henson, , CC, Burden, S, Davidson, SE; Lal, S                                                                                                                  | 2013 |
| Nivolumab for adults with Hodgkin's lymphoma (a rapid review using the software RobotReviewer)                                                   | Goldkuhle, , M, Dimaki, M, Gartlehner, G, Monsef, I, Dahm, P, Glossmann, JP, Engert, A, von Tresckow, B; Skoetz, N                                             | 2018 |
| Neuraxial blockade for the prevention of postoperative mortality and major morbidity: an overview of Cochrane systematic reviews                 | Guay, , J, Choi, P, Suresh, S, Albert, N, Kopp, S; Pace, NL                                                                                                    | 2014 |
| Non-surgical interventions for convergence insufficiency                                                                                         | Scheiman, , M, Gwiazda, J; Li, T                                                                                                                               | 2011 |
| Non-invasive positive pressure ventilation for treatment of respiratory failure due to severe acute exacerbations of asthma                      | Lim, , WJ, Mohammed Akram, R, Carson, KV, Mysore, S, Labiszewski, NA, Wedzicha, JA, Rowe, BH; Smith, BJ                                                        | 2012 |
| Non-steroidal anti-inflammatory drugs for heavy menstrual bleeding                                                                               | Lethaby, , A, Duckitt, K; Farquhar, C                                                                                                                          | 2013 |
| Nonoperative treatment for lumbar spinal stenosis with neurogenic claudication                                                                   | Ammendolia, , C, Stuber, KJ, Rok, E, Rampersaud, R, Kennedy, CA, Pennick, V, Steenstra, IA, de Bruin, LK; Furlan, AD                                           | 2013 |
| Non-steroidal anti-inflammatory drugs as disease-modifying agents for Parkinson's disease: evidence from observational studies                   | Rees, , K, Stowe, R, Patel, S, Ives, N, Breen, K, Clarke, CE; Ben-Shlomo, Y                                                                                    | 2011 |
| Non-pharmacological interventions for preventing job loss in workers with inflammatory arthritis                                                 | Hoving, , JL, Lacaille, D, Urquhart, DM, Hannu, TJ, Sluiter, JK; Frings-Dresen, MHW                                                                            | 2014 |
| One-to-one oral hygiene advice provided in a dental setting for oral health                                                                      | Soldani, , FA, Lamont, T, Jones, K, Young, L, Walsh, T, Lala, R; Clarkson, JE                                                                                  | 2018 |
| Nitrous Oxide for Colonoscopy                                                                                                                    | Aboumarzouk, , OM, Agarwal, T, Syed Nong Chek, SAH, Milewski, PJ; Nelson, RL                                                                                   | 2011 |
| Non-steroidal anti-inflammatory drugs (NSAIDs) for axial spondyloarthritis (ankylosing spondylitis and non-radiographic axial spondyloarthritis) | Kroon, , FPB, van der Burg, LRA, Ramiro, S, Landewé, RBM, Buchbinder, R, Falzon, L; van der Heijde, D                                                          | 2015 |
| Nutrient-enriched formula versus standard formula for preterm infants following hospital discharge                                               | Young, , L, Embleton, ND; McGuire, W                                                                                                                           | 2016 |
| Nitric oxide donors (nitrates), L-arginine, or nitric oxide synthase inhibitors for acute stroke                                                 | Bath, , PMW, Krishnan, K; Appleton, JP                                                                                                                         | 2017 |
| Optical reading aids for children and young people with low vision                                                                               | Barker, , L, Thomas, R, Rubin, G; Dahmann-Noor, A                                                                                                              | 2015 |
| Nitrates for the prevention of cardiac morbidity and mortality in patients undergoing non-cardiac surgery                                        | Zhao, , N, Xu, J, Singh, B, Yu, X, Wu, T; Huang, Y                                                                                                             | 2016 |
| Non-operative management versus operative management in high-grade blunt hepatic injury                                                          | Ciocchi, , R, Trastulli, S, Pressi, E, Farinella, E, Avenia, S, Morales Uribe, CH, Botero, AM; Barrera, LM                                                     | 2015 |

|                                                                                                                                                                                              |                                                                                                                                                                    |      |
|----------------------------------------------------------------------------------------------------------------------------------------------------------------------------------------------|--------------------------------------------------------------------------------------------------------------------------------------------------------------------|------|
| N-acetylcysteine as an adjuvant therapy for Helicobacter pylori eradication                                                                                                                  | Fontes, , LES, Martimbianco, ALC, Zanin, C; Riera, R                                                                                                               | 2019 |
| Occlusal splints for treating sleep bruxism (tooth grinding)                                                                                                                                 | Macedo, , CR, Silva, AB, Machado, MAC, Saconato, H; Prado, GF                                                                                                      | 2007 |
| Optimal intensity and type of leg exercise training for people with chronic obstructive pulmonary disease                                                                                    | Zainuldin, , R, Mackey, MG; Alison, JA                                                                                                                             | 2011 |
| Non-pharmacological interventions for preventing venous insufficiency in a standing worker population                                                                                        | Robertson, , L, Yeoh, SE; Kolbach, DN                                                                                                                              | 2013 |
| Optimal monitoring strategies for guiding when to switch first-line antiretroviral therapy regimens for treatment failure in adults and adolescents living with HIV in low-resource settings | Chang, , LW, Harris, J; Humphreys, EH                                                                                                                              | 2010 |
| Opioid antagonists with minimal sedation for opioid withdrawal                                                                                                                               | Gowing, , L, Ali, R; White, JM                                                                                                                                     | 2017 |
| Neurosurgical interventions for the treatment of classical trigeminal neuralgia                                                                                                              | Zakrzewska, , JM; Akram, H                                                                                                                                         | 2011 |
| Nutritional supplementation for stable chronic obstructive pulmonary disease                                                                                                                 | Ferreira, , IM, Brooks, D, White, J; Goldstein, R                                                                                                                  | 2012 |
| Omentoplasty for oesophagogastronomy after oesophagectomy                                                                                                                                    | Yuan, , Y, Zeng, X, Hu, Y, Xie, T; Zhao, Y                                                                                                                         | 2014 |
| Non-medical prescribing versus medical prescribing for acute and chronic disease management in primary and secondary care                                                                    | Weeks, , G, George, J, Maclure, K; Stewart, D                                                                                                                      | 2016 |
| Olanzapine versus other atypical antipsychotics for schizophrenia                                                                                                                            | Komossa, , K, Rummel-Kluge, C, Hunger, H, Schmid, F, Schwarz, S, Duggan, L, Kissling, W; Leucht, S                                                                 | 2010 |
| Nebulised surfactant in preterm infants with or at risk of respiratory distress syndrome                                                                                                     | Abdel-Latif, , ME; Osborn, DA                                                                                                                                      | 2012 |
| Olanzapine for the prevention and treatment of cancer-related nausea and vomiting in adults                                                                                                  | Sutherland, , A, Naessens, K, Plugge, E, Ware, L, Head, K, Burton, MJ; Wee, B                                                                                      | 2018 |
| New treatments compared to established treatments in randomized trials                                                                                                                       | Djulfbegovic, , B, Kumar, A, Glasziou, PP, Perera, R, Reljic, T, Dent, L, Raftery, J, Johansen, M, Di Tanna, GL, Miladinovic, B, Soares, HP, Vist, GE; Chalmers, I | 2012 |
| Non-invasive positive pressure ventilation (CPAP or bilevel NPPV) for cardiogenic pulmonary oedema                                                                                           | Berbenetz, , N, Wang, Y, Brown, J, Godfrey, C, Ahmad, M, Vital, FMR, Lambiase, P, Banerjee, A, Bakhai, A; Chong, M                                                 | 2019 |
| Omega-3 fatty acid addition during pregnancy                                                                                                                                                 | Middleton, , P, Gomersall, JC, Gould, JF, Shepherd, E, Olsen, SF; Makrides, M                                                                                      | 2018 |
| Non-pharmacological interventions for treating chronic prostatitis/chronic pelvic pain syndrome                                                                                              | Franco, , JVA, Turk, T, Jung, JH, Xiao, YT, Iakhno, S, Garrote, V; Vietto, V                                                                                       | 2018 |
| Nutritional interventions for reducing morbidity and mortality in people with HIV                                                                                                            | Grobler, , L, Siegfried, N, Visser, ME, Mahlangu, SSN; Volmink, J                                                                                                  | 2013 |
| Omega-3 fatty acids for intermittent claudication                                                                                                                                            | Campbell, , A, Price, J; Hiatt, WR                                                                                                                                 | 2013 |
| Newborn screening for homocystinuria                                                                                                                                                         | Walter, , JH, Jahnke, N; Remington, T                                                                                                                              | 2015 |
| Oestrogen therapy for urinary incontinence in post-menopausal women                                                                                                                          | Cody, , JD, Jacobs, ML, Richardson, K, Moehrer, B; Hextall, A                                                                                                      | 2012 |
| Nurse versus physician-led care for the management of asthma                                                                                                                                 | Kueth, , MC, Vaessen-Verberne, AAPH, Elbers, RG; Van Aalderen, WMC                                                                                                 | 2013 |
| Neo-adjuvant chemotherapy for invasive bladder cancer                                                                                                                                        | Collaboration, Advanced Bladder Cancer Meta-analysis                                                                                                               | 2004 |
| Omega 3 fatty acids for preventing or slowing the progression of age-related macular degeneration                                                                                            | Lawrenson, , JG; Evans, JR                                                                                                                                         | 2015 |
| Nutritional interventions for survivors of childhood cancer                                                                                                                                  | Cohen, , JE, Wakefield, CE; Cohn, RJ                                                                                                                               | 2016 |
| Non-invasive ventilation for cystic fibrosis                                                                                                                                                 | Moran, , F, Bradley, JM; Piper, AJ                                                                                                                                 | 2017 |
| Occlusion for stimulus deprivation amblyopia                                                                                                                                                 | Antonio-Santos, , A, Vedula, SS, Hatt, SR; Powell, C                                                                                                               | 2014 |
| Occupational safety and health enforcement tools for preventing occupational diseases and injuries                                                                                           | Mischke, , C, Verbeek, JH, Job, J, Morata, TC, Alvesalo-Kuusi, A, Neuvonen, K, Clarke, S; Pedlow, RI                                                               | 2013 |
| Nitrous oxide-based techniques versus nitrous oxide-free techniques for general anaesthesia                                                                                                  | Sun, , R, Jia, WQ, Zhang, P, Yang, K, Tian, JH, Ma, B, Liu, Y, Jia, RH, Luo, XF; Kuriyama, A                                                                       | 2015 |
| Non-drug therapies for lower limb muscle cramps                                                                                                                                              | Hawke, , F, Chuter, V, Walter, KEL; Burns, J                                                                                                                       | 2012 |
| Nitrates for acute heart failure syndromes                                                                                                                                                   | Wakai, , A, McCabe, A, Kidney, R, Brooks, SC, Seupaul, RA, Diercks, DB, Salter, N, Fermann, GJ; Pospisil, C                                                        | 2013 |
| Olanzapine IM or velotab for acutely disturbed/agitated people with suspected serious mental illnesses                                                                                       | Belgamwar, , RB; Fenton, M                                                                                                                                         | 2005 |
| Nebulized and oral thiol derivatives for pulmonary disease in cystic fibrosis                                                                                                                | Tam, , J, Nash, EF, Ratjen, F, Tullis, E; Stephenson, A                                                                                                            | 2013 |
| Non-surgical interventions for eosinophilic esophagitis                                                                                                                                      | Elliott, , EJ, Thomas, D; Markowitz, JE                                                                                                                            | 2010 |
| Omega-3 fatty acids for depression in adults                                                                                                                                                 | Appleton, , KM, Sallis, HM, Perry, R, Ness, AR; Churchill, R                                                                                                       | 2015 |
| Neostigmine for reversal of neuromuscular block in paediatric patients                                                                                                                       | Yang, , L, Yang, D, Li, Q, Zuo, Y; Lu, D                                                                                                                           | 2014 |
| Occupational therapy for care home residents with stroke                                                                                                                                     | Fletcher-Smith, , JC, Walker, MF, Cobley, CS, Steultjens, EMJ; Sackley, CM                                                                                         | 2013 |
| Neuropsychological and psychological interventions for people with newly diagnosed epilepsy                                                                                                  | Jackson, , CF, Makin, SM; Baker, GA                                                                                                                                | 2015 |
| Nut consumption for the primary prevention of cardiovascular disease                                                                                                                         | Martin, , N, Germanò, R, Hartley, L, Adler, AJ; Rees, K                                                                                                            | 2015 |

|                                                                                                                                                                                |                                                                                                                                                                     |      |
|--------------------------------------------------------------------------------------------------------------------------------------------------------------------------------|---------------------------------------------------------------------------------------------------------------------------------------------------------------------|------|
| Non-pharmacological interventions for cognitive impairment due to systemic cancer treatment                                                                                    | Treanor, , CJ, McMenamin, UC, O'Neill, RF, Cardwell, CR, Clarke, MJ, Cantwell, M; Donnelly, M                                                                       | 2016 |
| Omega-6 fats for the primary and secondary prevention of cardiovascular disease                                                                                                | Hooper, , L, Al-Khudairy, L, Abdelhamid, AS, Rees, K, Brainard, JS, Brown, TJ, Ajabnoor, SM, O'Brien, AT, Winstanley, LE, Donaldson, DH, Song, F; Deane, KHO        | 2018 |
| Negative pressure wound therapy for surgical wounds healing by primary closure                                                                                                 | Webster, , J, Liu, Z, Norman, G, Dumville, JC, Chiverton, L, Scuffham, P, Stankiewicz, M; Chaboyer, WP                                                              | 2019 |
| Nurse-led versus doctor-led care for bronchiectasis                                                                                                                            | Lawton, , K, Royals, K, Carson-Chahhoud, KV, Campbell, F; Smith, BJ                                                                                                 | 2018 |
| Nerve-sparing radical hysterectomy compared to standard radical hysterectomy for women with early stage cervical cancer (stage Ia2 to IIa)                                     | Kietpeerakool, , C, Aue-aunkul, A, Galaal, K, Ngamjarus, C; Lumbiganon, P                                                                                           | 2019 |
| Once daily long-acting beta2-agonists and long-acting muscarinic antagonists in a combined inhaler versus placebo for chronic obstructive pulmonary disease                    | Maqsood, , U, Ho, TN, Palmer, K, Eccles, FJR, Munavvar, M, Wang, R, Crossingham, I; Evans, DJW                                                                      | 2019 |
| Optical coherence tomography for diagnosing skin cancer in adults                                                                                                              | Ferrante di Ruffano, , L, Dinnes, J, Deeks, JJ, Chuchu, N, Bayliss, SE, Davenport, C, Takwoingi, Y, Godfrey, K, O'Sullivan, C, Martin, RN, Tehrani, H; Williams, HC | 2018 |
| Non-invasive positive pressure ventilation for prevention of complications after pulmonary resection in lung cancer patients                                                   | Torres, , MFS, Porfiro, GJM, Carvalho, APV; Riera, R                                                                                                                | 2019 |
| Non-pharmacological interventions for perceptual disorders following stroke and other adult-acquired, non-progressive brain injury                                             | Bowen, , A, Knapp, P, Gillespie, D, Nicolson, DJ; Vail, A                                                                                                           | 2011 |
| Nutrient-enriched formula versus standard formula for preterm infants                                                                                                          | Walsh, , V, Brown, JVE, Askie, LM, Embleton, ND; McGuire, W                                                                                                         | 2019 |
| Palliative endobronchial brachytherapy for non-small cell lung cancer                                                                                                          | Reveiz, , L, Rueda, JR; Cardona, AF                                                                                                                                 | 2012 |
| Patellar tendon versus hamstring tendon autograft for anterior cruciate ligament rupture in adults                                                                             | Mohtadi, , NGH, Chan, DS, Dainty, KN; Whelan, DB                                                                                                                    | 2011 |
| Oxytocin for preventing postpartum haemorrhage (PPH) in non-facility birth settings                                                                                            | Pantoja, , T, Abalos, E, Chapman, E, Vera, C; Serrano, VP                                                                                                           | 2016 |
| Palivizumab for prophylaxis against respiratory syncytial virus infection in children with cystic fibrosis                                                                     | Robinson, , KA, Odelola, OA; Saldanha, IJ                                                                                                                           | 2016 |
| Oral anticoagulants versus antiplatelet therapy for preventing stroke in patients with non-valvular atrial fibrillation and no history of stroke or transient ischemic attacks | Aguilar, , MI, Hart, R; Pearce, LA                                                                                                                                  | 2007 |
| Oral substitution treatment of injecting opioid users for prevention of HIV infection                                                                                          | Gowing, , L, Farrell, MF, Bornemann, R, Sullivan, LE; Ali, R                                                                                                        | 2011 |
| Parent-initiated oral corticosteroid therapy for intermittent wheezing illnesses in children                                                                                   | Vuillermin, , P, South, M; Robertson, C                                                                                                                             | 2006 |
| Pegloticase for chronic gout                                                                                                                                                   | Anderson, , A; Singh, JA                                                                                                                                            | 2010 |
| Patient isolation measures for infants with candida colonization or infection for preventing or reducing transmission of candida in neonatal units                             | Pammi, , M, Eddama, O; Weisman, LE                                                                                                                                  | 2011 |
| Oral versus intra-vaginal imidazole and triazole anti-fungal treatment of uncomplicated vulvovaginal candidiasis (thrush)                                                      | Nurbhai, , M, Grimshaw, J, Watson, M, Bond, CM, Mollison, JA; Ludbrook, A                                                                                           | 2007 |
| Perioperative antibiotics to prevent infection after first-trimester abortion                                                                                                  | Low, , N, Mueller, M, Van Vliet, HAAM; Kapp, N                                                                                                                      | 2012 |
| Pain relief for the removal of femoral sheath after percutaneous coronary intervention                                                                                         | Wensley, , C, Kent, B, McAleer, MB, Savage, SM; Stewart, JT                                                                                                         | 2008 |
| Oxygen therapy for cystic fibrosis                                                                                                                                             | Elphick, , HE; Mallory, G                                                                                                                                           | 2013 |
| Oxcarbazepine for acute affective episodes in bipolar disorder                                                                                                                 | Vasudev, , A, Macritchie, K, Vasudev, K, Watson, S, Geddes, J; Young, AH                                                                                            | 2011 |
| Paracetamol versus nonsteroidal anti-inflammatory drugs for rheumatoid arthritis                                                                                               | Wienecke, , T; Göttsche, PC                                                                                                                                         | 2004 |
| Oral immunoglobulin for preventing necrotizing enterocolitis in preterm and low birth weight neonates                                                                          | Foster, , JP, Seth, R; Cole, MJ                                                                                                                                     | 2016 |
| Perioperative dexmedetomidine for acute pain after abdominal surgery in adults                                                                                                 | Jessen Lundorf, , L, Korvenius Nedergaard, H; Møller, AM                                                                                                            | 2016 |
| Oral paracetamol (acetaminophen) for cancer pain                                                                                                                               | Wiffen, , PJ, Derry, S, Moore, RA, McNicol, ED, Bell, RF, Carr, DB, McIntyre, M; Wee, B                                                                             | 2017 |
| Options for self-management education for adults with asthma                                                                                                                   | Powell, , H; Gibson, PG                                                                                                                                             | 2002 |
| Oral 5-aminosalicylic acid for maintenance of surgically-induced remission in Crohn's disease                                                                                  | Gjulaadin-Hellon, , T, Gordon, M, Iheozor-Ejiofor, Z; Akobeng, AK                                                                                                   | 2019 |
| Pentoxifylline for treating venous leg ulcers                                                                                                                                  | Jull, , AB, Arroll, B, Parag, V; Waters, J                                                                                                                          | 2012 |
| Oral antivirals for preventing recurrent herpes simplex keratitis in people with corneal grafts                                                                                | Bhatt, , UK, Abdul Karim, MN, Prydal, JI, Maharajan, SV; Fares, U                                                                                                   | 2016 |
| Perianal injectable bulking agents as treatment for faecal incontinence in adults                                                                                              | Maeda, , Y, Laurberg, S; Norton, C                                                                                                                                  | 2013 |
| Oral antihistamine-decongestant-analgesic combinations for the common cold                                                                                                     | De Sutter, , AIM, van Driel, ML, Kumar, AA, Lesslar, O; Skrt, A                                                                                                     | 2012 |
| Perioperative fluid volume optimization following proximal femoral fracture                                                                                                    | Lewis, , SR, Butler, AR, Brammar, A, Nicholson, A; Smith, AF                                                                                                        | 2016 |
| Palliative biliary stents for obstructing pancreatic carcinoma                                                                                                                 | Moss, , AC, Morris, E; MacMathuna, P                                                                                                                                | 2006 |

|                                                                                                                                                                                            |                                                                                                                          |      |
|--------------------------------------------------------------------------------------------------------------------------------------------------------------------------------------------|--------------------------------------------------------------------------------------------------------------------------|------|
| Oxytocin receptor antagonists for inhibiting preterm labour                                                                                                                                | Flenady, , V, Reinebrant, HE, Liley, HG, Tambimuttu, EG; Papatonis, DNM                                                  | 2014 |
| Percutaneous transluminal coronary angioplasty with stents versus coronary artery bypass grafting for people with stable angina or acute coronary syndromes                                | Bakhai, , A, Hill, RA, Dundar, Y, Dickson, RC; Walley, T                                                                 | 2005 |
| Oral appliances and functional orthopaedic appliances for obstructive sleep apnoea in children                                                                                             | Carvalho, , FR, Lentini-Oliveira, DA, Prado, LBF, Prado, GF; Carvalho, LBC                                               | 2016 |
| Oral immunoglobulin for the prevention of rotavirus infection in low birth weight infants                                                                                                  | Pammi, , M; Haque, KN                                                                                                    | 2011 |
| Oral or topical nasal steroids for hearing loss associated with otitis media with effusion in children                                                                                     | Simpson, , SA, Lewis, R, van der Voort, J; Butler, CC                                                                    | 2011 |
| Oral appliances for obstructive sleep apnoea                                                                                                                                               | Lim, , J, Lasserson, TJ, Fleetham, J; Wright, JJ                                                                         | 2006 |
| Organisational interventions for improving wellbeing and reducing work-related stress in teachers                                                                                          | Naghieh, , A, Montgomery, P, Bonell, CP, Thompson, M; Aber, JL                                                           | 2015 |
| Oral immunoglobulin for the treatment of rotavirus diarrhea in low birth weight infants                                                                                                    | Pammi, , M; Haque, KN                                                                                                    | 2011 |
| Perioperative antibiotics for prevention of acute endophthalmitis after cataract surgery                                                                                                   | Gower, , EW, Lindsley, K, Tulenko, SE, Nanji, AA, Leyngold, I; McDonnell, PJ                                             | 2017 |
| Orthotic devices for the treatment of tennis elbow                                                                                                                                         | Struijs, , PAA, Smidt, N, Arola, H, van Dijk, CN, Buchbinder, R; Assendelft, WJJ                                         | 2002 |
| Perioperative blood transfusions and recurrence of colorectal cancer                                                                                                                       | Amato, , A; Pescatori, M                                                                                                 | 2006 |
| Oral naltrexone maintenance treatment for opioid dependence                                                                                                                                | Minozzi, , S, Amato, L, Vecchi, S, Davoli, M, Kirchmayer, U; Verster, A                                                  | 2011 |
| Oral budesonide for induction of remission in ulcerative colitis                                                                                                                           | Sherlock, , ME, MacDonald, JK, Griffiths, AM, Steinhart, AH; Seow, CH                                                    | 2015 |
| Oxatomide for stable asthma in adults and children                                                                                                                                         | Hayashi, , K, Yanagi, M, Wood-Baker, R, Takamatsu, IIT; Anami, KKA                                                       | 2003 |
| Oral deferiprone for iron chelation in people with thalassaemia                                                                                                                            | Fisher, , SA, Brunskill, SJ, Doree, C, Chowdhury, O, Gooding, S; Roberts, DJ                                             | 2013 |
| Oral contraceptives for functional ovarian cysts                                                                                                                                           | Grimes, , DA, Jones, LB, Lopez, LM; Schulz, KF                                                                           | 2014 |
| Oral potassium iodide for the treatment of sporotrichosis                                                                                                                                  | Xue, , S, Gu, R, Wu, T, Zhang, M; Wang, X                                                                                | 2009 |
| Perioperative angiotensin-converting enzyme inhibitors or angiotensin II type 1 receptor blockers for preventing mortality and morbidity in adults                                         | Zou, , Z, Yuan, HB, Yang, B, Xu, F, Chen, XY, Liu, GJ; Shi, XY                                                           | 2016 |
| Percutaneous cholecystostomy for high-risk surgical patients with acute calculous cholecystitis                                                                                            | Gurusamy, , KS, Rossi, M; Davidson, BR                                                                                   | 2013 |
| Oscillating devices for airway clearance in people with cystic fibrosis                                                                                                                    | Morrison, , L; Milroy, S                                                                                                 | 2017 |
| Patch angioplasty versus primary closure for carotid endarterectomy                                                                                                                        | Rerkasem, , K; Rothwell, PM                                                                                              | 2009 |
| Oxycodone for neuropathic pain in adults                                                                                                                                                   | Gaskell, , H, Derry, S, Stannard, C; Moore, RA                                                                           | 2016 |
| Percutaneous vascular interventions for acute ischaemic stroke                                                                                                                             | O'Rourke, , K, Berge, E, Walsh, CD; Kelly, PJ                                                                            | 2010 |
| Oral versus intravenous fluoropyrimidines for colorectal cancer                                                                                                                            | Chionh, , F, Lau, D, Yeung, Y, Price, T; Tebbutt, N                                                                      | 2017 |
| Oral theophylline for chronic obstructive pulmonary disease                                                                                                                                | Ram, , FSF, Jones, P, Jardim, J, Castro, AA, Atallah, AN, Lacasse, Y, Goldstein, R; Cendon, S                            | 2002 |
| Oral anti-diabetic pharmacological therapies for the treatment of women with gestational diabetes                                                                                          | Brown, , J, Martis, R, Hughes, B, Rowan, J; Crowther, CA                                                                 | 2017 |
| Orbital radiotherapy for adult thyroid eye disease                                                                                                                                         | Rajendram, , R, Bunce, C, Lee, RWJ; Morley, AMS                                                                          | 2012 |
| Oral and sublingual immunotherapy for egg allergy                                                                                                                                          | Romantsik, , O, Tosca, MA, Zappettini, S; Calevo, MG                                                                     | 2018 |
| Parent-mediated early intervention for young children with autism spectrum disorders (ASD)                                                                                                 | Oono, , IP, Honey, EJ; McConachie, H                                                                                     | 2013 |
| Parenteral anticoagulation in ambulatory patients with cancer                                                                                                                              | Akl, , EA, Kahale, LA, Hakoum, MB, Matar, CF, Sperati, F, Barba, M, Yosuico, VED, Terrenato, I, Synnot, A; Schünemann, H | 2017 |
| Patches of different types for carotid patch angioplasty                                                                                                                                   | Rerkasem, , K; Rothwell, PM                                                                                              | 2010 |
| Oral anti-diabetic agents for women with established diabetes/impaired glucose tolerance or previous gestational diabetes planning pregnancy, or pregnant women with pre-existing diabetes | Tieu, , J, Coat, S, Hague, W, Middleton, P; Shepherd, E                                                                  | 2017 |
| Patient reminder and recall interventions to improve immunization rates                                                                                                                    | Jacobson Vann, , JC, Jacobson, RM, Coyne-Beasley, T, Asafu-Adjei, JK; Szilagyi, PG                                       | 2018 |
| Pathogen-reduced platelets for the prevention of bleeding                                                                                                                                  | Estcourt, , LJ, Malouf, R, Hopewell, S, Trivella, M, Doree, C, Stanworth, SJ; Murphy, MF                                 | 2017 |
| Oral steroids for adhesive capsulitis                                                                                                                                                      | Buchbinder, , R, Green, S, Youd, JM; Johnston, RV                                                                        | 2006 |
| Oral H1 antihistamines as monotherapy for eczema                                                                                                                                           | Apfelbacher, , CJ, van Zuuren, EJ, Fedorowicz, Z, Jupiter, A, Mattemer, U; Weisshaar, E                                  | 2013 |
| Oral vitamin B12 versus intramuscular vitamin B12 for vitamin B12 deficiency                                                                                                               | Wang, , H, Li, L, Qin, LL, Song, Y, Vidal-Alaball, J; Liu, TH                                                            | 2018 |
| Oral beta-blockers for mild to moderate hypertension during pregnancy                                                                                                                      | Magee, , L; Duley, L                                                                                                     | 2003 |
| Oral antiviral therapy for prevention of genital herpes outbreaks in immunocompetent and nonpregnant patients                                                                              | Le Cleach, , L, Trinquart, L, Do, G, Maruani, A, Lebrun-Vignes, B, Ravaud, P; Chosidow, O                                | 2014 |

|                                                                                                                                                                                      |                                                                                                                             |      |
|--------------------------------------------------------------------------------------------------------------------------------------------------------------------------------------|-----------------------------------------------------------------------------------------------------------------------------|------|
| PCSK9 monoclonal antibodies for the primary and secondary prevention of cardiovascular disease                                                                                       | Schmidt, , AF, Pearce, LS, Wilkins, JT, Overington, JP, Hingorani, AD; Casas, JP                                            | 2017 |
| Oral adsorbents for preventing or delaying the progression of chronic kidney disease                                                                                                 | Wu, , HM, Sun, HJ, Wang, F, Yang, M, Dong, BR; Liu, GJ                                                                      | 2014 |
| Penicillin for secondary prevention of rheumatic fever                                                                                                                               | Manyemba, , J; Mayosi, BM                                                                                                   | 2002 |
| Pancreatic enzymes for chronic pancreatitis                                                                                                                                          | Shafiq, , N, Rana, S, Bhasin, D, Pandhi, P, Srivastava, P, Sehmbi, SS, Kumar, R; Malhotra, S                                | 2009 |
| Penile rehabilitation for postprostatectomy erectile dysfunction                                                                                                                     | Philippou, , YA, Jung, JH, Steggall, MJ, O'Driscoll, ST, Bakker, CJ, Bodie, JA; Dahm, P                                     | 2018 |
| Pancreatic enzyme replacement therapy for people with cystic fibrosis                                                                                                                | Somaraju, , UR; Solis-Moya, A                                                                                               | 2016 |
| Orthodontic treatment for prominent upper front teeth (Class II malocclusion) in children and adolescents                                                                            | Batista, , KBSL, Thiruvengkatachari, B, Harrison, JE; O'Brien, KD                                                           | 2018 |
| Oral contraceptive pill for primary dysmenorrhoea                                                                                                                                    | Wong, , CL, Farquhar, C, Roberts, H; Proctor, M                                                                             | 2009 |
| Oral treatments for fungal infections of the skin of the foot                                                                                                                        | Bell-Syer, , SEM, Khan, SM; Torgerson, DJ                                                                                   | 2012 |
| Oral nonsteroidal anti-inflammatory drugs for fibromyalgia in adults                                                                                                                 | Derry, , S, Wiffen, PJ, Häuser, W, Mücke, M, Tölle, TR, Bell, RF; Moore, RA                                                 | 2017 |
| Over-the-counter (OTC) medications to reduce cough as an adjunct to antibiotics for acute pneumonia in children and adults                                                           | Chang, , CC, Cheng, AC; Chang, AB                                                                                           | 2014 |
| Oral betamimetics for maintenance therapy after threatened preterm labour                                                                                                            | Dodd, , JM, Crowther, CA; Middleton, P                                                                                      | 2012 |
| Oxygen for breathlessness in patients with chronic obstructive pulmonary disease who do not qualify for home oxygen therapy                                                          | Ekström, , M, Ahmadi, Z, Bornefalk-Hermansson, A, Abernethy, A; Currow, D                                                   | 2016 |
| Palliative chemotherapy and targeted therapies for esophageal and gastroesophageal junction cancer                                                                                   | Janmaat, , VT, Steyerberg, EW, van der Gaast, A, Mathijssen, RHJ, Bruno, MJ, Peppelenbosch, MP, Kuipers, EJ; Spaander, MCW  | 2017 |
| Overground physical therapy gait training for chronic stroke patients with mobility deficits                                                                                         | States, , RA, Pappas, E; Salem, Y                                                                                           | 2009 |
| Pain management for inflammatory arthritis (rheumatoid arthritis, psoriatic arthritis, ankylosing spondylitis and other spondyloarthritis) and gastrointestinal or liver comorbidity | Radner, , H, Ramiro, S, Buchbinder, R, Landewé, RBM, van der Heijde, D; Aletaha, D                                          | 2012 |
| Oxygen therapy for lower respiratory tract infections in children between 3 months and 15 years of age                                                                               | Rojas-Reyes, , MX, Granados Rugeles, C; Charry-Anzola, LP                                                                   | 2014 |
| Percutaneous lines for delivering intravenous antibiotics in people with cystic fibrosis                                                                                             | Prayle, , AP, Hurley, MN; Smyth, AR                                                                                         | 2010 |
| Oral anticoagulation in people with cancer who have no therapeutic or prophylactic indication for anticoagulation                                                                    | Kahale, , LA, Hakoum, MB, Tsolokian, IG, Matar, CF, Barba, M, Yosuco, VED, Terrenato, I, Sperati, F, Schünemann, H; Akl, EA | 2017 |
| Oral health educational interventions for nursing home staff and residents                                                                                                           | Albrecht, , M, Kupfer, R, Reissmann, DR, Mühlhauser, I; Köpke, S                                                            | 2016 |
| Oral protein calorie supplementation for children with chronic disease                                                                                                               | Francis, , DK, Smith, J, Saljuqi, T; Watling, RM                                                                            | 2015 |
| Perioperative enhanced recovery programmes for gynaecological cancer patients                                                                                                        | Lu, , D, Wang, X; Shi, G                                                                                                    | 2015 |
| Perioperative chemo(radio)therapy versus primary surgery for resectable adenocarcinoma of the stomach, gastroesophageal junction, and lower esophagus                                | Ronellenfitsch, , U, Schwarzbach, M, Hofheinz, R, Kienle, P, Kieser, M, Slinger, TE; Jensen, K                              | 2013 |
| Pelargonium sidoides extract for treating acute respiratory tract infections                                                                                                         | Timmer, , A, Günther, J, Motschall, E, Rücker, G, Antes, G; Kern, WV                                                        | 2013 |
| Oral iron supplements for children in malaria-endemic areas                                                                                                                          | Neuberger, , A, Okebe, J, Yahav, D; Paul, M                                                                                 | 2016 |
| Pentoxifylline for diabetic kidney disease                                                                                                                                           | Shan, , D, Wu, HM, Yuan, QY, Li, J, Zhou, RL; Liu, GJ                                                                       | 2012 |
| Pedicle screw fixation for traumatic fractures of the thoracic and lumbar spine                                                                                                      | Cheng, , LM, Wang, JJ, Zeng, ZL, Zhu, R, Yu, Y, Li, C; Wu, ZR                                                               | 2013 |
| Perioperative increase in global blood flow to explicit defined goals and outcomes following surgery                                                                                 | Grocott, , MPW, Dushianthan, A, Hamilton, MA, Mythen, MG, Harrison, D; Rowan, K                                             | 2012 |
| Oral non-steroidal anti-inflammatory drugs versus other oral analgesic agents for acute soft tissue injury                                                                           | Jones, , P, Dalziel, SR, Lamdin, R, Miles-Chan, JL; Frampton, C                                                             | 2015 |
| Orthodontic treatment for distalising upper first molars in children and adolescents                                                                                                 | Jambi, , S, Thiruvengkatachari, B, O'Brien, KD; Walsh, T                                                                    | 2013 |
| Oral contraceptives containing drospirenone for premenstrual syndrome                                                                                                                | Lopez, , LM, Kaptein, AA; Helmerhorst, FM                                                                                   | 2012 |
| Oral xanthines as maintenance treatment for asthma in children                                                                                                                       | Seddon, , P, Bara, A, Lasserson, TJ; Ducharme, FM                                                                           | 2006 |
| Percutaneous ethanol injection for liver metastases                                                                                                                                  | Riemsma, , RP, Bala, MM, Wolff, R; Kleijnen, J                                                                              | 2013 |
| Ovarian stimulation protocols (anti-oestrogens, gonadotrophins with and without GnRH agonists/antagonists) for intrauterine insemination (IUI) in women with subfertility            | Cantineau, , AEP; Cohlen, BJ                                                                                                | 2007 |
| Palliative surgery versus medical management for bowel obstruction in ovarian cancer                                                                                                 | Kucukmetin, , A, Naik, R, Galaal, K, Bryant, A; Dickinson, HO                                                               | 2010 |
| Patient-controlled analgesia with remifentanyl versus alternative parenteral methods for pain management in labour                                                                   | Weibel, , S, Jelting, Y, Afshari, A, Pace, NL, Eberhart, LHJ, Jokinen, J, Artmann, T; Kranke, P                             | 2017 |
| Pain management for rheumatoid arthritis and cardiovascular or renal comorbidity                                                                                                     | Marks, , JL, Colebatch, AN, Buchbinder, R; Edwards, CJ                                                                      | 2011 |
| Periodontal therapy as adjunctive treatment for gastric Helicobacter pylori infection                                                                                                | Ren, , Q, Yan, X, Zhou, Y; Li, WX                                                                                           | 2016 |

|                                                                                                                                                               |                                                                                                                           |      |
|---------------------------------------------------------------------------------------------------------------------------------------------------------------|---------------------------------------------------------------------------------------------------------------------------|------|
| Pentoxifylline, propentofylline and pentifylline for acute ischaemic stroke                                                                                   | Bath, , PMW; Bath-Hextall, FJ                                                                                             | 2004 |
| Oral stimulation for promoting oral feeding in preterm infants                                                                                                | Greene, , Z, O'Donnell, CPF; Walshe, M                                                                                    | 2016 |
| Pentoxifylline for treatment of sepsis and necrotizing enterocolitis in neonates                                                                              | Pammi, , M; Haque, KN                                                                                                     | 2015 |
| Partial exchange transfusion to prevent neurodevelopmental disability in infants with polycythemia                                                            | Özek, , E, Soll, R; Schimmel, MS                                                                                          | 2010 |
| Oximes for acute organophosphate pesticide poisoning                                                                                                          | Buckley, , NA, Eddleston, M, Li, Y, Bevan, M; Robertson, J                                                                | 2011 |
| Parenting interventions for the prevention of unintentional injuries in childhood                                                                             | Kendrick, , D, Mulvaney, CA, Ye, L, Stevens, T, Mytton, JA; Stewart-Brown, S                                              | 2013 |
| Oral steroids for long-term use in cystic fibrosis                                                                                                            | Cheng, , K, Ashby, D; Smyth, RL                                                                                           | 2015 |
| Participation in environmental enhancement and conservation activities for health and well-being in adults: a review of quantitative and qualitative evidence | Husk, , K, Lovell, R, Cooper, C, Stahl-Timmins, W; Garside, R                                                             | 2016 |
| Oral zinc for treating diarrhoea in children                                                                                                                  | Lazzerini, , M; Wanzira, H                                                                                                | 2016 |
| Oxcarbazepine for neuropathic pain                                                                                                                            | Zhou, , M, Chen, N, He, L, Yang, M, Zhu, C; Wu, F                                                                         | 2017 |
| Ovulation suppression for endometriosis for women with subfertility                                                                                           | Hughes, , E, Brown, J, Collins, JJ, Farquhar, C, Fedorkow, DM; Vanderkerchove, P                                          | 2007 |
| Patient education for preventing diabetic foot ulceration                                                                                                     | Dorresteyn, , JAN, Kriegsman, DMW, Assendelft, WJJ; Valk, GD                                                              | 2014 |
| Percutaneous transluminal balloon angioplasty and stenting for carotid artery stenosis                                                                        | Bonati, , LH, Lyrer, P, Ederle, J, Featherstone, R; Brown, MM                                                             | 2012 |
| Percutaneous transluminal angioplasty and stenting for vertebral artery stenosis                                                                              | Coward, , L, Featherstone, R; Brown, MM                                                                                   | 2005 |
| Oral calorie supplements for cystic fibrosis                                                                                                                  | Smyth, , RL; Rayner, O                                                                                                    | 2017 |
| Pegylated liposomal doxorubicin for first-line treatment of epithelial ovarian cancer                                                                         | Lawrie, , TA, Rabbie, R, Thoma, C; Morrison, J                                                                            | 2013 |
| Osteotomy for treating knee osteoarthritis                                                                                                                    | Brouwer, , RW, Huizinga, MR, Duivenvoorden, T, van Raaij, TM, Verhagen, AP, Bierma-Zeinstra, SMA; Verhaar, JAN            | 2014 |
| Oral versus injectable ovulation induction agents for unexplained subfertility                                                                                | Athallah, , N, Proctor, M; Johnson, N                                                                                     | 2002 |
| Oral antifungal medication for toenail onychomycosis                                                                                                          | Kreijkamp-Kaspers, , S, Hawke, K, Guo, L, Kerin, G, Bell-Syer, SEM, Magin, P, Bell-Syer, SV; van Driel, ML                | 2017 |
| Peginterferon plus ribavirin versus interferon plus ribavirin for chronic hepatitis C                                                                         | Hauser, , G, Awad, T, Brok, J, Thorlund, K, Štimac, D, Mabrouk, M, Gluud, C; Gluud, LL                                    | 2014 |
| Orientation and mobility training for adults with low vision                                                                                                  | Virgili, , G; Rubin, G                                                                                                    | 2010 |
| Partial nephrectomy versus radical nephrectomy for clinical localised renal masses                                                                            | Kunath, , F, Schmidt, S, Krabbe, LM, Miernik, A, Dahm, P, Cleves, A, Walther, M; Kroeger, N                               | 2017 |
| Penfluridol for schizophrenia                                                                                                                                 | Soares, , BGO; Silva de Lima, M                                                                                           | 2006 |
| Pericyazine for schizophrenia                                                                                                                                 | Matar, , HE, Almerie, MQ, Makhoul, S, Xia, J; Humphreys, P                                                                | 2014 |
| Percutaneous transluminal angioplasty for treatment of chronic cerebrospinal venous insufficiency (CCSVI) in people with multiple sclerosis                   | Jagannath, , VA, Pucci, E, Asokan, GV; Robak, EW                                                                          | 2019 |
| Parenteral versus oral iron therapy for adults and children with chronic kidney disease                                                                       | O'Lone, , EL, Hodson, EM, Nistor, I, Bolognani, D, Webster, AC; Craig, JC                                                 | 2019 |
| Oral Astragalus (Huang qi) for preventing frequent episodes of acute respiratory tract infection in children                                                  | Su, , G, Chen, X, Liu, Z, Yang, L, Zhang, L, Stålsby Lundborg, C, Wen, Z, Guo, X, Qin, X, Liang, J; Liu, X                | 2016 |
| Payment methods for outpatient care facilities                                                                                                                | Yuan, , B, He, L, Meng, Q; Jia, L                                                                                         | 2017 |
| Patient support and education for promoting adherence to highly active antiretroviral therapy for HIV/AIDS                                                    | Rueda, , S, Park-Wyllie, LY, Bayoumi, A, Tynan, AM, Antoniou, T, Rourke, S; Glazier, R                                    | 2006 |
| Oxcarbazepine in the maintenance treatment of bipolar disorder                                                                                                | Vasudev, , A, Macritchie, K, Watson, S, Geddes, J; Young, AH                                                              | 2008 |
| Perioperative glycaemic control for diabetic patients undergoing surgery                                                                                      | Buchleitner, , AM, Martínez-Alonso, M, Hernández, M, Solà, I; Mauricio, D                                                 | 2012 |
| Oxygen therapy for acute myocardial infarction                                                                                                                | Cabello, , JB, Burls, A, Emparanza, JI, Bayliss, SE; Quinn, T                                                             | 2016 |
| Oral anticoagulants for preventing stroke in patients with non-valvular atrial fibrillation and no previous history of stroke or transient ischemic attacks   | Aguilar, , MI; Hart, R                                                                                                    | 2005 |
| Palliative care interventions in advanced dementia                                                                                                            | Murphy, , E, Froggatt, K, Connolly, S, O'Shea, E, Sampson, EL, Casey, D; Devane, D                                        | 2016 |
| Patellar taping for patellofemoral pain syndrome in adults                                                                                                    | Callaghan, , MJ; Selfe, J                                                                                                 | 2012 |
| Pentoxifylline for alcoholic hepatitis                                                                                                                        | Whitfield, , K, Rambaldi, A, Wetterslev, J; Gluud, C                                                                      | 2009 |
| Pain-relieving agents for infantile colic                                                                                                                     | Biagioli, , E, Tarasco, V, Lingua, C, Moja, L; Savino, F                                                                  | 2016 |
| Oropharyngeal colostrum in preventing mortality and morbidity in preterm infants                                                                              | Nasuf, , AWA, Ojha, S; Dorling, J                                                                                         | 2018 |
| Orthodontic and orthopaedic treatment for anterior open bite in children                                                                                      | Lentini-Oliveira, , DA, Carvalho, FR, Rodrigues, CG, Ye, Q, Hu, R, Minami-Sugaya, H, Carvalho, LBC, Prado, LBF; Prado, GF | 2014 |

|                                                                                                                                             |                                                                                                                           |      |
|---------------------------------------------------------------------------------------------------------------------------------------------|---------------------------------------------------------------------------------------------------------------------------|------|
| Oxcarbazepine versus phenytoin monotherapy for epilepsy: an individual participant data review                                              | Nevitt, , SJ, Tudur Smith, C; Marson, AG                                                                                  | 2018 |
| Oral and intrauterine progestogens for atypical endometrial hyperplasia                                                                     | Luo, , L, Luo, B, Zheng, Y, Zhang, H, Li, J; Sidell, N                                                                    | 2018 |
| Paracetamol (acetaminophen) or non-steroidal anti-inflammatory drugs, alone or combined, for pain relief in acute otitis media in children  | Sjoukes, , A, Venekamp, RP, van de Pol, AC, Hay, AD, Little, P, Schilder, AGM; Damoiseaux, RAMJ                           | 2016 |
| Perazine for schizophrenia                                                                                                                  | Leucht, , S, Helfer, B; Hartung, B                                                                                        | 2014 |
| Padma 28 for intermittent claudication                                                                                                      | Stewart, , M, Morling, JR; Maxwell, H                                                                                     | 2016 |
| Paracetamol versus placebo or physical methods for treating fever in children                                                               | Meremikwu, , MM; Oyo-Ita, A                                                                                               | 2002 |
| Oral corticosteroids for stable chronic obstructive pulmonary disease                                                                       | Walters, , JAE, Walters, EH; Wood-Baker, R                                                                                | 2005 |
| Paracetamol (acetaminophen) for prevention or treatment of pain in newborns                                                                 | Ohlsson, , A; Shah, PS                                                                                                    | 2016 |
| Oral care measures for preventing nursing home-acquired pneumonia                                                                           | Liu, , C, Cao, Y, Lin, J, Ng, L, Needleman, I, Walsh, T; Li, C                                                            | 2018 |
| Outpatient treatment for people with cancer who develop a low-risk febrile neutropaenic event                                               | Rivas-Ruiz, , R, Villasis-Keever, M, Miranda-Novales, G, Castela-Martinez, OD; Rivas-Contreras, S                         | 2019 |
| Oxygen therapy during exercise training in chronic obstructive pulmonary disease                                                            | Nonoyama, , M, Brooks, D, Lacasse, Y, Guyatt, GH; Goldstein, R                                                            | 2007 |
| Perioperative alcohol cessation intervention for postoperative complications                                                                | Egholm, , JWM, Pedersen, B, Møller, AM, Adami, J, Juhl, CB; Tønnesen, H                                                   | 2018 |
| Oral traditional Chinese medication for adhesive small bowel obstruction                                                                    | Suo, , T, Gu, X, Andersson, R, Ma, H, Zhang, W, Deng, W, Zhang, B, Cai, D; Qin, X                                         | 2012 |
| Patient education for adults with rheumatoid arthritis                                                                                      | Riemsma, , RP, Kirwan, JR, Taal, E; Rasker, HJJ                                                                           | 2003 |
| Pentoxifylline for the prevention of bronchopulmonary dysplasia in preterm infants                                                          | Schulzke, , SM, Kaempfen, S; Patole, SK                                                                                   | 2014 |
| Patient education for neck pain                                                                                                             | Gross, , A, Forget, M, St George, K, Fraser, MMH, Graham, N, Perry, L, Burnie, SJ, Goldsmith, CH, Haines, T; Brunarski, D | 2012 |
| Parenteral fluid regimens for improving functional outcome in people with acute stroke                                                      | Visvanathan, , A, Dennis, M; Whiteley, W                                                                                  | 2015 |
| Oral immunotherapy for milk allergy                                                                                                         | Yeung, , JP, Kloda, LA, McDevitt, J, Ben-Shoshan, M; Alizadehfar, R                                                       | 2012 |
| Partial liquid ventilation for preventing death and morbidity in adults with acute lung injury and acute respiratory distress syndrome      | Galvin, , IM, Steel, A, Pinto, R, Ferguson, ND; Davies, MW                                                                | 2013 |
| Orthodontic treatment for posterior crossbites                                                                                              | Agostino, , P, Ugolini, A, Signori, A, Silvestrini-Biavati, A, Harrison, JE; Riley, P                                     | 2014 |
| Pentoxifylline for intermittent claudication                                                                                                | Salhiyyah, , K, Forster, R, Senanayake, E, Abdel-Hadi, M, Booth, A; Michaels, JA                                          | 2015 |
| Peginterferon alpha-2a versus peginterferon alpha-2b for chronic hepatitis C                                                                | Hauser, , G, Awad, T, Thorlund, K, Štimac, D, Mabrouk, M; Gluud, C                                                        | 2014 |
| Pacing for drug-refractory or drug-intolerant hypertrophic cardiomyopathy                                                                   | Qintar, , M, Morad, A, Alhawasli, H, Shorbaji, K, Firwana, B, Essali, A; Kadro, W                                         | 2012 |
| Percutaneous needle aspiration, injection, and re-aspiration with or without benzimidazole coverage for uncomplicated hepatic hydatid cysts | Nasseri-Moghaddam, , S, Abrishami, A, Taefi, A; Malekzadeh, R                                                             | 2011 |
| Oral H1 antihistamines as 'add-on' therapy to topical treatment for eczema                                                                  | Matterne, , U, Böhmer, MM, Weisshaar, E, Jupiter, A, Carter, B; Apfelbacher, CJ                                           | 2019 |
| Oral anti-pseudomonal antibiotics for cystic fibrosis                                                                                       | Remington, , T, Jahnke, N; Harkensee, C                                                                                   | 2016 |
| Perioperative medications for preventing temporarily increased intraocular pressure after laser trabeculoplasty                             | Zhang, , L, Weizer, JS; Musch, DC                                                                                         | 2017 |
| Peer support for people with schizophrenia or other serious mental illness                                                                  | Chien, , WT, Clifton, AV, Zhao, S; Lui, S                                                                                 | 2019 |
| Paracetamol versus placebo for knee and hip osteoarthritis                                                                                  | Leopoldino, , AO, Machado, GC, Ferreira, PH, Pinheiro, MB, Day, R, McLachlan, AJ, Hunter, DJ; Ferreira, ML                | 2019 |
| Percutaneous central venous catheters versus peripheral cannulae for delivery of parenteral nutrition in neonates                           | Ainsworth, , S; McGuire, W                                                                                                | 2015 |
| Percutaneous vascular interventions versus intravenous thrombolytic treatment for acute ischaemic stroke                                    | Lindekleiv, , H, Berge, E, Bruins Slot, KMH; Wardlaw, JM                                                                  | 2018 |
| Oral isotretinoin for acne                                                                                                                  | Costa, , CS, Bagatin, E, Martimbianco, ALC, da Silva, EMK, Lúcio, MM, Magin, P; Riera, R                                  | 2018 |
| Oral vasodilators for primary Raynaud's phenomenon                                                                                          | Stewart, , M; Morling, JR                                                                                                 | 2012 |
| Parent-mediated interventions for promoting communication and language development in young children with Down syndrome                     | O'Toole, , C, Lee, ASY, Gibbon, FE, van Bysterveldt, AK; Hart, NJ                                                         | 2018 |
| Pay for performance for hospitals                                                                                                           | Mathes, , T, Pieper, D, Morche, J, Polus, S, Jaschinski, T; Eikermann, M                                                  | 2019 |
| Selective serotonin reuptake inhibitors for premenstrual syndrome                                                                           | Marjoribanks, , J, Brown, J, O'Brien, PMS; Wyatt, K                                                                       | 2013 |
| Selenium supplementation for asthma                                                                                                         | Allam, , MF; Lucena, RA                                                                                                   | 2004 |
| Splenectomy for people with thalassaemia major or intermedia                                                                                | Easow Mathew, , M, Sharma, A; Aravindakshan, R                                                                            | 2016 |
| Screening women for intimate partner violence in healthcare settings                                                                        | O'Doherty, , L, Hegarty, K, Ramsay, J, Davidson, LL, Feder, G; Taft, A                                                    | 2015 |
| School-based programmes for preventing smoking                                                                                              | Thomas, , RE, McLellan, J; Perera, R                                                                                      | 2013 |

|                                                                                                                                                                                                         |                                                                                                                 |      |
|---------------------------------------------------------------------------------------------------------------------------------------------------------------------------------------------------------|-----------------------------------------------------------------------------------------------------------------|------|
| Single layer versus double layer suture anastomosis of the gastrointestinal tract                                                                                                                       | Sajid, , MS, Siddiqui, MRS; Baig, MK                                                                            | 2012 |
| Short-term late-generation antibiotics versus longer term penicillin for acute streptococcal pharyngitis in children                                                                                    | Altamimi, , S, Khalil, A, Khalaiwi, KA, Milner, RA, Pusic, MV; Al Othman, MA                                    | 2012 |
| Specialist outreach clinics in primary care and rural hospital settings.                                                                                                                                | Gruen, , RL, Weeramanthri, TS, Knight, SS; Bailie, RS                                                           | 2003 |
| Standard (head-down tilt) versus modified (without head-down tilt) postural drainage in infants and young children with cystic fibrosis                                                                 | Freitas, , DA, Chaves, GSS, Santino, TA, Ribeiro, CTD, Dias, FAL, Guerra, RO; Mendonça, KMPP                    | 2018 |
| Standard versus biofilm antimicrobial susceptibility testing to guide antibiotic therapy in cystic fibrosis                                                                                             | Waters, , V; Ratjen, F                                                                                          | 2017 |
| Scalpel versus no-scalpel incision for vasectomy                                                                                                                                                        | Cook, , LA, Pun, A, Gallo, MF, Lopez, LM; Van Vliet, HAAM                                                       | 2014 |
| Semen preparation techniques for intrauterine insemination                                                                                                                                              | Boomsma, , CM, Heineman, MJ, Cohlen, BJ; Farquhar, C                                                            | 2007 |
| Specialist home-based nursing services for children with acute and chronic illnesses                                                                                                                    | Parab, , CS, Cooper, C, Woolfenden, S; Piper, SM                                                                | 2013 |
| Sodium channel blockers for cystic fibrosis                                                                                                                                                             | Burrows, , EF, Southern, KW; Noone, PG                                                                          | 2014 |
| Slow advancement of enteral feed volumes to prevent necrotising enterocolitis in very low birth weight infants                                                                                          | Oddie, , SJ, Young, L; McGuire, W                                                                               | 2017 |
| Self-management education and regular practitioner review for adults with asthma                                                                                                                        | Gibson, , PG, Powell, H, Wilson, A, Abramson, MJ, Haywood, P, Bauman, A, Hensley, MJ, Walters, EH; Roberts, JJJ | 2002 |
| Sleep positioning systems for children with cerebral palsy                                                                                                                                              | Blake, , SF, Logan, S, Humphreys, G, Matthews, J, Rogers, M, Thompson-Coon, J, Wyatt, K; Morris, C              | 2015 |
| Screening for lung cancer                                                                                                                                                                               | Manser, , R, Lethaby, A, Irving, LB, Stone, C, Byrnes, G, Abramson, MJ; Campbell, D                             | 2013 |
| Short-term treatment with proton pump inhibitors, H2-receptor antagonists and prokinetics for gastro-oesophageal reflux disease-like symptoms and endoscopy negative reflux disease                     | Sigterman, , KE, van Pinxteren, B, Bonis, PA, Lau, J; Numans, ME                                                | 2013 |
| Stage-based interventions for smoking cessation                                                                                                                                                         | Cahill, , K, Lancaster, T; Green, N                                                                             | 2010 |
| Second-line chemotherapy for non-small cell lung cancer                                                                                                                                                 | Bonfill Cosp, , X, Serra, C, Sacristan, M, Nogué, M, Losa, F; Montesinos, J                                     | 2002 |
| Single dose oral aspirin for acute postoperative pain in adults                                                                                                                                         | Derry, , S; Moore, RA                                                                                           | 2012 |
| Screening for colorectal cancer using the faecal occult blood test, Hemoccult                                                                                                                           | Hewitson, , P, Glasziou, PP, Irwig, L, Towler, B; Watson, E                                                     | 2007 |
| Specific allergen immunotherapy for the treatment of atopic eczema                                                                                                                                      | Tam, , H, Calderon, MA, Manikam, L, Nankervis, H, García Núñez, I, Williams, HC, Durham, S; Boyle, RJ           | 2016 |
| Sound therapy (masking) in the management of tinnitus in adults                                                                                                                                         | Hobson, , J, Chisholm, E; El Refaie, A                                                                          | 2012 |
| Single dose oral diflunisal for acute postoperative pain in adults                                                                                                                                      | Wasey, , JO, Derry, S, Moore, RA; McQuay, HJ                                                                    | 2010 |
| Short-course antibiotics for acute otitis media                                                                                                                                                         | Kozyrskyj, , AL, Klassen, TP, Moffatt, M; Harvey, K                                                             | 2010 |
| Shared care across the interface between primary and specialty care in management of long term conditions                                                                                               | Smith, , SM, Cousins, G, Clyne, B, Allwright, S; O'Dowd, T                                                      | 2017 |
| Single dose oral sulindac for acute postoperative pain in adults                                                                                                                                        | Moore, , RA, Derry, S; McQuay, HJ                                                                               | 2009 |
| Sertraline versus other antidepressive agents for depression                                                                                                                                            | Cipriani, , A, La Ferla, T, Furukawa, TA, Signoretti, A, Nakagawa, A, Churchill, R, McGuire, H; Barbui, C       | 2010 |
| Single dose oral dexibuprofen [S(+)-ibuprofen] for acute postoperative pain in adults                                                                                                                   | Derry, , S, Best, J; Moore, RA                                                                                  | 2013 |
| Special care units for dementia individuals with behavioural problems                                                                                                                                   | Lai, , CKY, Yeung, JHM, Mok, V; Chi, I                                                                          | 2009 |
| Single agent versus combination chemotherapy for metastatic breast cancer                                                                                                                               | Carrick, , S, Parker, S, Thornton, CE, Ghera, D, Simes, J; Wilcken, N                                           | 2009 |
| Single dose dipyron for acute renal colic pain                                                                                                                                                          | Edwards, , J, Meseguer, F, Faura, C, Moore, RA, McQuay, HJ; Derry, S                                            | 2002 |
| Second-generation antipsychotics for obsessive compulsive disorder                                                                                                                                      | Komossa, , K, Depping, AM, Meyer, M, Kissling, W; Leucht, S                                                     | 2010 |
| Single dose oral tenoxicam for acute postoperative pain in adults                                                                                                                                       | Moore, , OA, McIntyre, M, Moore, RA, Derry, S; McQuay, HJ                                                       | 2009 |
| Simple behavioural interventions for nocturnal enuresis in children                                                                                                                                     | Caldwell, , PHY, Nankivell, G; Sureshkumar, P                                                                   | 2013 |
| Sodium-glucose cotransporter (SGLT) 2 inhibitors for prevention or delay of type 2 diabetes mellitus and its associated complications in people at risk for the development of type 2 diabetes mellitus | Hemmingsen, , B, Krogh, J, Metzendorf, MI; Richter, B                                                           | 2016 |
| Silver-coated endotracheal tubes for prevention of ventilator-associated pneumonia in critically ill patients                                                                                           | Tokmaji, , G, Vermeulen, H, Müller, MCA, Kwakman, PHS, Schultz, MJ; Zaat, SAJ                                   | 2015 |
| Sodium bicarbonate supplements for treating acute kidney injury                                                                                                                                         | Hewitt, , J, Uniacke, M, Hansi, NK, Venkat-Raman, G; McCarthy, K                                                | 2012 |
| Single dose oral fenbufen for acute postoperative pain in adults                                                                                                                                        | Moore, , RA, Derry, S; McQuay, HJ                                                                               | 2009 |
| Selenium supplementation to prevent short-term morbidity in preterm neonates                                                                                                                            | Darlow, , BA; Austin, N                                                                                         | 2003 |
| Single dose oral tiaprofenic acid for acute postoperative pain in adults                                                                                                                                | Moore, , RA, Derry, S, Moore, M; McQuay, HJ                                                                     | 2009 |
| Saline nasal irrigation for acute upper respiratory tract infections                                                                                                                                    | King, , D, Mitchell, B, Williams, CP; Spurling, GKP                                                             | 2015 |



|                                                                                                                                        |                                                                                                                                 |      |
|----------------------------------------------------------------------------------------------------------------------------------------|---------------------------------------------------------------------------------------------------------------------------------|------|
| Second-generation antipsychotics for major depressive disorder and dysthymia                                                           | Komossa, , K, Depping, AM, Gaudchau, A, Kissling, W; Leucht, S                                                                  | 2010 |
| Second-generation antipsychotics for anxiety disorders                                                                                 | Depping, , AM, Komossa, K, Kissling, W; Leucht, S                                                                               | 2010 |
| Sentinel lymph node biopsy followed by lymph node dissection for localised primary cutaneous melanoma                                  | Kyrgidis, , A, Tzellos, T, Mocellin, S, Apalla, Z, Lallas, A, Pilati, P; Stratigos, A                                           | 2015 |
| Short-course versus prolonged-course antibiotic therapy for hospital-acquired pneumonia in critically ill adults                       | Pugh, , R, Grant, C, Cooke, RPD; Dempsey, G                                                                                     | 2015 |
| School-based interventions for improving contraceptive use in adolescents                                                              | Lopez, , LM, Bernholc, A, Chen, M; Tolley, EE                                                                                   | 2016 |
| Sound reduction management in the neonatal intensive care unit for preterm or very low birth weight infants                            | Almadhoob, , A; Ohlsson, A                                                                                                      | 2015 |
| Single dose oral nabumetone for acute postoperative pain in adults                                                                     | Moore, , RA, Derry, S, Moore, M; McQuay, HJ                                                                                     | 2009 |
| Selective serotonin reuptake inhibitors (SSRIs) for stroke recovery                                                                    | Mead, , GE, Hsieh, CF, Lee, R, Kutlubaev, MA, Claxton, A, Hankey, GJ; Hackett, ML                                               | 2012 |
| Self-certification versus physician certification of sick leave for reducing sickness absence and associated costs                     | Kausto, , J, Verbeek, JH, Ruotsalainen, JH, Halonen, JI, Virta, LJ; Kankaanpää, E                                               | 2019 |
| Self-management education for cystic fibrosis                                                                                          | Savage, , E, Beirne, PV, Ni Chroinin, M, Duff, A, Fitzgerald, T; Farrell, D                                                     | 2014 |
| Skin antisepsis for reducing central venous catheter-related infections                                                                | Lai, , NM, Lai, NA, O'Riordan, E, Chaiyakunapruk, N, Taylor, JE; Tan, K                                                         | 2016 |
| Short versus long duration infusions of paclitaxel for any advanced adenocarcinoma                                                     | Williams, , C; Bryant, A                                                                                                        | 2011 |
| Shouldice technique versus other open techniques for inguinal hernia repair                                                            | Amato, , B, Moja, L, Panico, S, Persico, G, Rispoli, C, Rocco, N; Moschetti, I                                                  | 2012 |
| Selenium supplementation for the primary prevention of cardiovascular disease                                                          | Rees, , K, Hartley, L, Day, C, Flowers, N, Clarke, A; Stranges, S                                                               | 2013 |
| Short acting beta2-agonists for recurrent wheeze in children under two years of age                                                    | Chavasse, , RJPG, Seddon, P, Bara, A; McKean, MC                                                                                | 2002 |
| Single dose oral codeine, as a single agent, for acute postoperative pain in adults                                                    | Derry, , S, Moore, RA; McQuay, HJ                                                                                               | 2010 |
| Simulated presence therapy for dementia                                                                                                | Abraha, , I, Rimland, JM, Lozano-Montoya, I, Dell'Aquila, G, Vélez-Díaz-Pallarés, M, Trotta, FM, Cruz-Jentoft, AJ; Cherubini, A | 2017 |
| Self-management education programmes for osteoarthritis                                                                                | Kroon, , FPB, van der Burg, LRA, Buchbinder, R, Osborne, RH, Johnston, RV; Pitt, V                                              | 2014 |
| Simultaneous bilateral training for improving arm function after stroke                                                                | Coupar, , F, Pollock, A, van Wijck, F, Morris, J; Langhorne, P                                                                  | 2010 |
| Self management for patients with chronic obstructive pulmonary disease                                                                | Zwerink, , M, Brusse-Keizer, M, van der Valk, PDLPM, Zielhuis, GA, Monnikhof, EM, van der Palen, J, Frith, PA; Effing, T        | 2014 |
| Sodium channel blockers for neuroprotection in multiple sclerosis                                                                      | Yang, , C, Hao, Z, Zhang, L, Zeng, L; Wen, J                                                                                    | 2015 |
| Skin patch and vaginal ring versus combined oral contraceptives for contraception                                                      | Lopez, , LM, Grimes, DA, Gallo, MF, Stockton, LL; Schulz, KF                                                                    | 2013 |
| Sequential versus standard triple first-line therapy for Helicobacter pylori eradication                                               | Nyssen, , OP, McNicholl, AG, Megraud, F, Savarino, V, Oderda, G, Fallone, CA, Fischbach, L, Bazzoli, F; Gisbert, JP             | 2016 |
| Sequential combination of glucocorticosteroids and alfa interferon versus alfa interferon alone for HBsAg-positive chronic hepatitis B | Mellerup, , MT, Krogsgaard, K, Mathurin, P, Gluud, C; Poynard, T                                                                | 2005 |
| Sildenafil citrate for erectile dysfunction in patients with multiple sclerosis                                                        | Xiao, , Y, Wang, J; Luo, H                                                                                                      | 2012 |
| Scalpel versus electrosurgery for major abdominal incisions                                                                            | Charoenkwan, , K, Iheozor-Ejiofor, Z, Rerkasem, K; Matovinovic, E                                                               | 2017 |
| Single-incision sling operations for urinary incontinence in women                                                                     | Nambiar, , A, Cody, JD, Jeffery, ST; Aluko, P                                                                                   | 2017 |
| Screening for oesophageal cancer                                                                                                       | Yang, , S, Wu, S, Huang, Y, Shao, Y, Chen, XY, Xian, L, Zheng, J, Wen, Y, Chen, X, Li, H; Yang, C                               | 2012 |
| Stapled versus conventional surgery for hemorrhoids                                                                                    | Lumb, , KJ, Colquhoun, PH, Malthaner, R; Jayaraman, S                                                                           | 2006 |
| Selenium supplementation for critically ill adults                                                                                     | Allingstrup, , M; Afshari, A                                                                                                    | 2015 |
| Sentinel node assessment for diagnosis of groin lymph node involvement in vulvar cancer                                                | Lawrie, , TA, Patel, A, Martin-Hirsch, PPL, Bryant, A, Ratnavelu, NDG, Naik, R; Ralte, A                                        | 2014 |
| Shared decision making interventions for people with mental health conditions                                                          | Duncan, , E, Best, C; Hagen, S                                                                                                  | 2010 |
| Simple urethral dilatation, endoscopic urethrotomy, and urethroplasty for urethral stricture disease in adult men                      | Wong, , SSW, Aboumarzouk, OM, Narahari, R, O'Riordan, A; Pickard, R                                                             | 2012 |
| Secondary suturing compared to non-suturing for broken down perineal wounds following childbirth                                       | Dudley, , LM, Kettle, C; Ismail, KMK                                                                                            | 2013 |
| Single versus combination intravenous anti-pseudomonal antibiotic therapy for people with cystic fibrosis                              | Elphick, , HE; Scott, A                                                                                                         | 2016 |
| Single dose oral fenopropfen for acute postoperative pain in adults                                                                    | Traa, , MX, Derry, S; Moore, RA                                                                                                 | 2011 |
| Saline irrigation for chronic rhinosinusitis                                                                                           | Chong, , LY, Head, K, Hopkins, C, Philpott, C, Glew, S, Scadding, G, Burton, MJ; Schilder, AGM                                  | 2016 |
| Speech therapy for children with dysarthria acquired before three years of age                                                         | Pennington, , L, Parker, NK, Kelly, H; Miller, N                                                                                | 2016 |
| Short-course oral steroids alone for chronic rhinosinusitis                                                                            | Head, , K, Chong, LY, Hopkins, C, Philpott, C, Burton, MJ; Schilder, AGM                                                        | 2016 |

|                                                                                                                                                                |                                                                                                                                                                    |      |
|----------------------------------------------------------------------------------------------------------------------------------------------------------------|--------------------------------------------------------------------------------------------------------------------------------------------------------------------|------|
| School-based physical activity programs for promoting physical activity and fitness in children and adolescents aged 6 to 18                                   | Dobbins, , M, Husson, H, DeCorby, K; LaRocca, RL                                                                                                                   | 2013 |
| Selective serotonin reuptake inhibitors for fibromyalgia syndrome                                                                                              | Walitt, , B, Urrútia, G, Nishishinya, MB, Cantrell, SE; Häuser, W                                                                                                  | 2015 |
| Single dose oral mefenamic acid for acute postoperative pain in adults                                                                                         | Moll, , R, Derry, S, Moore, RA; McQuay, HJ                                                                                                                         | 2011 |
| Sedation versus general anaesthesia for provision of dental treatment to patients younger than 18 years                                                        | Ashley, , PF, Williams, CECS, Moles, DR; Parry, J                                                                                                                  | 2015 |
| Short-course oral steroids as an adjunct therapy for chronic rhinosinusitis                                                                                    | Head, , K, Chong, LY, Hopkins, C, Philpott, C, Schilder, AGM; Burton, MJ                                                                                           | 2016 |
| Single-dose intravesical chemotherapy after nephroureterectomy for upper tract urothelial carcinoma                                                            | Hwang, , EC, Sathianathan, NJ, Jung, JH, Kim, MH, Dahm, P; Risk, MC                                                                                                | 2019 |
| Six months therapy for tuberculous meningitis                                                                                                                  | Jullien, , S, Ryan, H, Modi, M; Bhatia, R                                                                                                                          | 2016 |
| School feeding for improving the physical and psychosocial health of disadvantaged students                                                                    | Kristjansson, , B, Petticrew, M, MacDonald, B, Krasevec, J, Janzen, L, Greenhalgh, T, Wells, GA, MacGowan, J, Farmer, AP, Shea, B, Mayhew, A, Tugwell, P; Welch, V | 2007 |
| Single dose oral acemetacin for acute postoperative pain in adults                                                                                             | Moore, , RA, Derry, S; McQuay, HJ                                                                                                                                  | 2009 |
| Sliding scale insulin for non-critically ill hospitalised adults with diabetes mellitus                                                                        | Colunga-Lozano, , LE, Gonzalez Torres, FJ, Delgado-Figueroa, N, Gonzalez-Padilla, DA, Hernandez, AV, Roman, Y; Cuello-García, CA                                   | 2018 |
| Short-acting insulin analogues versus regular human insulin for adults with type 1 diabetes mellitus                                                           | Fullerton, , B, Siebenhofer, A, Jeitler, K, Horvath, K, Semlitsch, T, Berghold, A, Plank, J, Pieber, TR; Gerlach, FM                                               | 2016 |
| Short-acting beta2-agonists for stable chronic obstructive pulmonary disease                                                                                   | Sestini, , P, Renzoni, E, Robinson, S, Poole, P; Ram, FSF                                                                                                          | 2002 |
| Single dose oral lumiracoxib for postoperative pain in adults                                                                                                  | Roy, , YM, Derry, S; Moore, RA                                                                                                                                     | 2010 |
| Stapler versus scalpel resection followed by hand-sewn closure of the pancreatic remnant for distal pancreatectomy                                             | Probst, , P, Hüttner, FJ, Klaiber, U, Knebel, P, Ulrich, A, Böhler, MW; Diener, MK                                                                                 | 2015 |
| Selective noradrenaline reuptake inhibitors for schizophrenia                                                                                                  | Matthews, , PRL, Horder, J; Pearce, M                                                                                                                              | 2018 |
| Speech and language therapy versus placebo or no intervention for speech problems in Parkinson's disease                                                       | Herd, , CP, Tomlinson, CL, Deane, KHO, Brady, MC, Smith, CH, Sackley, CM; Clarke, CE                                                                               | 2012 |
| Silver based wound dressings and topical agents for treating diabetic foot ulcers                                                                              | Bergin, , S; Wraight, P                                                                                                                                            | 2006 |
| Short-term low-dose corticosteroids vs placebo and nonsteroidal antiinflammatory drugs in rheumatoid arthritis                                                 | Göttsche, , PC; Johansen, HK                                                                                                                                       | 2005 |
| Self-management for bronchiectasis                                                                                                                             | Kelly, , C, Grundy, S, Lynes, D, Evans, DJW, Gudur, S, Milan, SJ; Spencer, S                                                                                       | 2018 |
| Screening for genital chlamydia infection                                                                                                                      | Low, , N, Redmond, S, Uusküla, A, van Bergen, J, Ward, H, Andersen, B; Götz, H                                                                                     | 2016 |
| Scapular fixation in muscular dystrophy                                                                                                                        | Orrell, , RW, Copeland, S; Rose, MR                                                                                                                                | 2010 |
| Skin preparation with alcohol versus alcohol followed by any antiseptic for preventing bacteraemia or contamination of blood for transfusion                   | Webster, , J, Bell-Syer, SEM; Foxlee, R                                                                                                                            | 2015 |
| Stapled versus handsewn methods for colorectal anastomosis surgery                                                                                             | Neutzling, , CB, Lustosa, SAS, Proenca, IM, da Silva, EMK; Matos, D                                                                                                | 2012 |
| Single dose oral aceclofenac for postoperative pain in adults                                                                                                  | Moore, , RA, Derry, S; McQuay, HJ                                                                                                                                  | 2009 |
| Statins for acute coronary syndrome                                                                                                                            | Vale, , N, Nordmann, AJ, Schwartz, GG, de Lemos, J, Colivicchi, F, den Hartog, F, Ostadal, P, Macin, SM, Liem, AH, Mills, EJ, Bhatnagar, N, Bucher, HC; Briel, M   | 2014 |
| Self-management interventions including action plans for exacerbations versus usual care in patients with chronic obstructive pulmonary disease                | Lenferink, , A, Brusse-Keizer, M, van der Valk, PDLPM, Frith, PA, Zwerink, M, Monnikhof, EM, van der Palen, J; Effing, TW                                          | 2017 |
| Selective serotonin reuptake inhibitors (SSRIs) and serotonin-norepinephrine reuptake inhibitors (SNRIs) for the prevention of tension-type headache in adults | Banzi, , R, Cusi, C, Randazzo, C, Sterzi, R, Tedesco, D; Moja, L                                                                                                   | 2015 |
| Skin grafting for venous leg ulcers                                                                                                                            | Jones, , JE, Nelson, EA; Al-Hity, A                                                                                                                                | 2013 |
| Screening for gestational diabetes mellitus based on different risk profiles and settings for improving maternal and infant health                             | Tieu, , J, McPhee, AJ, Crowther, CA, Middleton, P; Shepherd, E                                                                                                     | 2017 |
| Screening for prostate cancer                                                                                                                                  | Ilic, , D, Neuberger, MM, Djulbegovic, M; Dahm, P                                                                                                                  | 2013 |
| Screening for peripheral arterial disease                                                                                                                      | Andras, , A; Ferket, B                                                                                                                                             | 2014 |
| Silodosin for the treatment of lower urinary tract symptoms in men with benign prostatic hyperplasia                                                           | Jung, , JH, Kim, J, MacDonald, R, Reddy, B, Kim, MH; Dahm, P                                                                                                       | 2017 |
| Screening for breast cancer with mammography                                                                                                                   | Göttsche, , PC; Jørgensen, KJ                                                                                                                                      | 2013 |
| School-based education programmes for the prevention of child sexual abuse                                                                                     | Walsh, , K, Zwi, K, Woolfenden, S; Shlonsky, A                                                                                                                     | 2015 |
| Sequencing of chemotherapy and radiotherapy for early breast cancer                                                                                            | Hickey, , BE, Francis, DP; Lehman, M                                                                                                                               | 2013 |
| Splints and Orthosis for treating rheumatoid arthritis                                                                                                         | Egan, , M, Brosseau, L, Farmer, M, Ouimet, MA, Rees, S, Tugwell, P; Wells, GA                                                                                      | 2001 |
| Splinting for carpal tunnel syndrome                                                                                                                           | Page, , MJ, Massy-Westropp, N, O'Connor, D; Pitt, V                                                                                                                | 2012 |
| Speed cameras for the prevention of road traffic injuries and deaths                                                                                           | Wilson, , C, Willis, C, Hendrikz, JK, Le Brocq, R; Bellamy, N                                                                                                      | 2010 |

|                                                                                                                                                   |                                                                                                                                                                                                                                                       |      |
|---------------------------------------------------------------------------------------------------------------------------------------------------|-------------------------------------------------------------------------------------------------------------------------------------------------------------------------------------------------------------------------------------------------------|------|
| Service organisation for the secondary prevention of ischaemic heart disease in primary care                                                      | Buckley, , BS, Byrne, MC; Smith, SM                                                                                                                                                                                                                   | 2010 |
| Statin withdrawal in people with dementia                                                                                                         | McGuinness, , B, Cardwell, CR; Passmore, P                                                                                                                                                                                                            | 2016 |
| Screening programmes for the early detection and prevention of oral cancer                                                                        | Brocklehurst, , P, Kujan, O, O'Malley, LA, Ogden, G, Shepherd, S; Glenny, AM                                                                                                                                                                          | 2013 |
| Spermicide used alone for contraception                                                                                                           | Grimes, , DA, Lopez, LM, Raymond, EG, Halpern, V, Nanda, K; Schulz, KF                                                                                                                                                                                | 2013 |
| Short courses of antibiotics for children and adults with bronchiectasis                                                                          | Wurzel, , D, Marchant, JM, Yerkovich, ST, Upham, JW, Masters, IB; Chang, AB                                                                                                                                                                           | 2011 |
| Screening with urinary dipsticks for reducing morbidity and mortality                                                                             | Krogsbøll, , LT, Jørgensen, KJ; Gøtzsche, PC                                                                                                                                                                                                          | 2015 |
| Single dose oral naproxen and naproxen sodium for acute postoperative pain in adults                                                              | Derry, , CJ, Derry, S, Moore, RA; McQuay, HJ                                                                                                                                                                                                          | 2009 |
| Screening for abdominal aortic aneurysm                                                                                                           | Cosford, , PA, Leng, GC; Thomas, J                                                                                                                                                                                                                    | 2007 |
| Single dose oral indometacin for the treatment of acute postoperative pain                                                                        | Moore, , RA, Derry, S, Mason, L, McQuay, HJ; Edwards, J                                                                                                                                                                                               | 2004 |
| Single dose oral meloxicam for acute postoperative pain in adults                                                                                 | Moore, , RA, Derry, S; McQuay, HJ                                                                                                                                                                                                                     | 2009 |
| Single dose oral ibuprofen plus codeine for acute postoperative pain in adults                                                                    | Derry, , S, Karlin, SM; Moore, RA                                                                                                                                                                                                                     | 2015 |
| Slow-release oral morphine as maintenance therapy for opioid dependence                                                                           | Ferri, , M, Minozzi, S, Bo, A; Amato, L                                                                                                                                                                                                               | 2013 |
| Short acting insulin analogues versus regular human insulin in patients with diabetes mellitus                                                    | Siebenhofer, , A, Plank, J, Berghold, A, Jeitler, K, Horvath, K, Narath, M, Gfrerer, R; Pieber, TR                                                                                                                                                    | 2006 |
| Short-term ambulatory oxygen for chronic obstructive pulmonary disease                                                                            | Bradley, , JM; O'Neill, BM                                                                                                                                                                                                                            | 2005 |
| Specially formulated foods for treating children with moderate acute malnutrition in low- and middle-income countries                             | Lazzerini, , M, Rubert, L; Pani, P                                                                                                                                                                                                                    | 2013 |
| Stapled versus handsewn methods for ileocolic anastomoses                                                                                         | Choy, , PYG, Bissett, IP, Docherty, JG, Parry, BR, Merrie, A; Fitzgerald, A                                                                                                                                                                           | 2011 |
| Sedation of children undergoing dental treatment                                                                                                  | Ashley, , PF, Chaudhary, M; Lourenço-Matharu, L                                                                                                                                                                                                       | 2018 |
| Single dose oral nefopam for acute postoperative pain in adults                                                                                   | Kakkar, , M, Derry, S, Moore, RA; McQuay, HJ                                                                                                                                                                                                          | 2009 |
| Single dose oral dihydrocodeine for acute postoperative pain                                                                                      | Moore, , RA, Edwards, J, Derry, S; McQuay, HJ                                                                                                                                                                                                         | 2000 |
| Sequencing of anthracyclines and taxanes in neoadjuvant and adjuvant therapy for early breast cancer                                              | Zaheed, , M, Wilcken, N, Willson, ML, O'Connell, DL; Goodwin, A                                                                                                                                                                                       | 2019 |
| Sealing procedures for preterm prelabour rupture of membranes                                                                                     | Crowley, , AE, Grivell, RM; Dodd, JM                                                                                                                                                                                                                  | 2016 |
| Sargramostim (GM-CSF) for induction of remission in Crohn's disease                                                                               | Roth, , L, MacDonald, JK, McDonald, JWD; Chande, N                                                                                                                                                                                                    | 2011 |
| Staff-led interventions for improving oral hygiene in patients following stroke                                                                   | Brady, , MC, Furlanetto, D, Hunter, R, Lewis, SC; Milne, V                                                                                                                                                                                            | 2006 |
| Skin preparation for preventing infection following caesarean section                                                                             | Hadiati, , DR, Hakimi, M, Nurdiani, DS, da Silva Lopes, K; Ota, E                                                                                                                                                                                     | 2018 |
| Saline irrigation for the management of skin extravasation injury in neonates                                                                     | Gopalakrishnan, , PN, Goel, N; Banerjee, S                                                                                                                                                                                                            | 2017 |
| Selective estrogen receptor modulators (SERMs) for uterine leiomyomas                                                                             | Deng, , L, Wu, T, Chen, XY, Xie, L; Yang, J                                                                                                                                                                                                           | 2012 |
| Single dose oral oxycodone and oxycodone plus paracetamol (acetaminophen) for acute postoperative pain in adults                                  | Gaskell, , H, Derry, S, Moore, RA; McQuay, HJ                                                                                                                                                                                                         | 2009 |
| Single dose oral piroxicam for acute postoperative pain                                                                                           | Moore, , RA, Edwards, J, Loke, YKK, Derry, S; McQuay, HJ                                                                                                                                                                                              | 2000 |
| Single dose oral lornoxicam for acute postoperative pain in adults                                                                                | Hall, , PE, Derry, S, Moore, RA; McQuay, HJ                                                                                                                                                                                                           | 2009 |
| Single dose oral ibuprofen plus caffeine for acute postoperative pain in adults                                                                   | Derry, , S, Wiffen, PJ; Moore, RA                                                                                                                                                                                                                     | 2015 |
| Semi-recumbent position versus supine position for the prevention of ventilator-associated pneumonia in adults requiring mechanical ventilation   | Wang, , L, Li, X, Yang, Z, Tang, X, Yuan, Q, Deng, L; Sun, X                                                                                                                                                                                          | 2016 |
| Single incision versus conventional multi-incision appendicectomy for suspected appendicitis                                                      | Rehman, , H, Rao, AM; Ahmed, I                                                                                                                                                                                                                        | 2011 |
| Singing for children and adults with bronchiectasis                                                                                               | Irons, , JY, Kenny, DT; Chang, AB                                                                                                                                                                                                                     | 2010 |
| Single dose oral rofecoxib for acute postoperative pain in adults                                                                                 | Bulley, , S, Derry, S, Moore, RA; McQuay, HJ                                                                                                                                                                                                          | 2009 |
| Singing as an adjunct therapy for children and adults with cystic fibrosis                                                                        | Irons, , JY, Petocz, P, Kenny, DT; Chang, AB                                                                                                                                                                                                          | 2019 |
| Slum upgrading strategies involving physical environment and infrastructure interventions and their effects on health and socio-economic outcomes | Turley, , R, Saith, R, Bhan, N, Rehfuess, E; Carter, B                                                                                                                                                                                                | 2013 |
| Sclerotherapy for lower limb telangiectasias                                                                                                      | Schwartz, , L; Maxwell, H                                                                                                                                                                                                                             | 2011 |
| Short-course versus long-course therapy of the same antibiotic for community-acquired pneumonia in adolescent and adult outpatients               | López-Alcalde, , J, Rodríguez-Barrientos, R, Redondo-Sánchez, J, Muñoz-Gutiérrez, J, Molero García, JM, Rodríguez-Fernández, C, Heras-Mosteiro, J, Marin-Cañada, J, Casanova-Colominas, J, Azcoaga-Lorenzo, A, Hernandez Santiago, V; Gómez-García, M | 2018 |

|                                                                                                                                                   |                                                                                                                                                                            |      |
|---------------------------------------------------------------------------------------------------------------------------------------------------|----------------------------------------------------------------------------------------------------------------------------------------------------------------------------|------|
| Spectacle correction versus no spectacles for prevention of strabismus in hyperopic children                                                      | Jones-Jordan, , L, Wang, X, Scherer, RW; Mutti, DO                                                                                                                         | 2014 |
| Smartphone and tablet self management apps for asthma                                                                                             | Marcano Belisario, , JS, Huckvale, K, Greenfield, G, Car, J; Gunn, LH                                                                                                      | 2013 |
| Screening and subsequent management for thyroid dysfunction pre-pregnancy and during pregnancy for improving maternal and infant health           | Spencer, , L, Bubner, T, Bain, E; Middleton, P                                                                                                                             | 2015 |
| Smoking cessation interventions for pulmonary tuberculosis treatment outcomes                                                                     | Jeyashree, , K, Kathirvel, S, Shewade, HD, Kaur, H; Goel, S                                                                                                                | 2016 |
| Smectite for acute infectious diarrhoea in children                                                                                               | Pérez-Gaxiola, , G, Cuello-García, CA, Florez, ID; Pérez-Pico, VM                                                                                                          | 2018 |
| Sapropterin dihydrochloride for phenylketonuria                                                                                                   | Somaraju, , UR; Merrin, M                                                                                                                                                  | 2015 |
| Second trimester serum tests for Down's Syndrome screening                                                                                        | Allred, , SK, Deeks, JJ, Guo, B, Neilson, JP; Alfirevic, Z                                                                                                                 | 2012 |
| Selective serotonin reuptake inhibitors (SSRIs) and serotonin-norepinephrine reuptake inhibitors (SNRIs) for the prevention of migraine in adults | Banzi, , R, Cusi, C, Randazzo, C, Sterzi, R, Tedesco, D; Moja, L                                                                                                           | 2015 |
| Single dose oral flurbiprofen for acute postoperative pain in adults                                                                              | Sultan, , A, McQuay, HJ, Moore, RA; Derry, S                                                                                                                               | 2009 |
| Single dose oral etodolac for acute postoperative pain in adults                                                                                  | Tirunagari, , SK, Derry, S, Moore, RA; McQuay, HJ                                                                                                                          | 2009 |
| Screening for nasopharyngeal cancer                                                                                                               | Yang, , S, Wu, S, Zhou, J; Chen, XY                                                                                                                                        | 2015 |
| Selenium supplementation for Hashimoto's thyroiditis                                                                                              | van Zuuren, , EJ, Albusta, AY, Fedorowicz, Z, Carter, B; Pijl, H                                                                                                           | 2013 |
| Short-acting insulin analogues versus regular human insulin for adult, non-pregnant persons with type 2 diabetes mellitus                         | Fullerton, , B, Siebenhofer, A, Jeitler, K, Horvath, K, Semlitsch, T, Berghold, A; Gerlach, FM                                                                             | 2018 |
| School-based education programmes for the prevention of unintentional injuries in children and young people                                       | Orton, , E, Whitehead, J, Mhizha-Murira, J, Clarkson, M, Watson, MC, Mulvaney, CA, Staniforth, JUL, Bhuchar, M; Kendrick, D                                                | 2016 |
| Six-month therapy for abdominal tuberculosis                                                                                                      | Jullien, , S, Jain, S, Ryan, H; Ahuja, V                                                                                                                                   | 2016 |
| Specialist teams for neonatal transport to neonatal intensive care units for prevention of morbidity and mortality                                | Chang, , ASM, Berry, A, Jones, LJ; Sivasangari, S                                                                                                                          | 2015 |
| Social skills training for attention deficit hyperactivity disorder (ADHD) in children aged 5 to 18 years                                         | Storebø, , OJ, Elmoose Andersen, M, Skoog, M, Joost Hansen, S, Simonsen, E, Pedersen, N, Tendal, B, Callesen, HE, Faltinsen, E; Gluud, C                                   | 2019 |
| Smoking cessation intervention for reducing disease activity in chronic autoimmune inflammatory joint diseases                                    | Roelsgaard, , IK, Esbensen, BA, Østergaard, M, Rollefstad, S, Semb, AG, Christensen, R; Thomsen, T                                                                         | 2019 |
| Screening for reducing morbidity and mortality in malignant melanoma                                                                              | Johansson, , M, Brodersen, J, Gøtzsche, PC; Jørgensen, KJ                                                                                                                  | 2019 |
| School-based self-management interventions for asthma in children and adolescents: a mixed methods systematic review                              | Harris, , K, Kneale, D, Lasserson, TJ, McDonald, VM, Grigg, J; Thomas, J                                                                                                   | 2019 |
| Smartphone applications for triaging adults with skin lesions that are suspicious for melanoma                                                    | Chuchu, , N, Takwoingi, Y, Dinnes, J, Matin, RN, Bassett, O, Moreau, JF, Bayliss, SE, Davenport, C, Godfrey, K, O'Connell, S, Jain, A, Walter, FM, Deeks, JJ; Williams, HC | 2018 |
| Second-generation antidepressants for preventing seasonal affective disorder in adults                                                            | Gartlehner, , G, Nussbaumer-Streit, B, Gaynes, BN, Forneris, CA, Morgan, LC, Greenblatt, A, Wipplinger, J, Lux, LJ, Van Noord, MG; Winkler, D                              | 2019 |
| School dental screening programmes for oral health                                                                                                | Arora, , A, Khattri, S, Ismail, NM, Kumbargere Nagraj, S; Eachempati, P                                                                                                    | 2019 |
| Transcutaneous electrostimulation for osteoarthritis of the knee                                                                                  | Rutjes, , AWS, Nüesch, E, Sterchi, R, Kalichman, L, Hendriks, E, Osiri, M, Brosseau, L, Reichenbach, S; Jüni, P                                                            | 2009 |
| Transcutaneous carbon dioxide monitoring for the prevention of neonatal morbidity and mortality                                                   | Bruschettini, , M, Romantsik, O, Zappettini, S, Ramenghi, LA; Calevo, MG                                                                                                   | 2016 |
| Therapeutic drug monitoring of antiretrovirals for people with HIV                                                                                | Kredo, , T, Van der Walt, JS, Siegfried, N; Cohen, K                                                                                                                       | 2009 |
| Topical treatments for HIV-related oral ulcers                                                                                                    | Kuteyi, , T; Okwundu, CI                                                                                                                                                   | 2012 |
| Total versus subtotal hysterectomy for benign gynaecological conditions                                                                           | Lethaby, , A, Mukhopadhyay, A; Naik, R                                                                                                                                     | 2012 |
| Thromboelastography (TEG) or thromboelastometry (ROTEM) to monitor haemostatic treatment versus usual care in adults or children with bleeding    | Wikkelsø, , A, Wetterslev, J, Møller, AM; Afshari, A                                                                                                                       | 2016 |
| Transcranial direct current stimulation (tDCS) for improving aphasia in adults with aphasia after stroke                                          | Elsner, , B, Kugler, J, Pohl, M; Mehrholz, J                                                                                                                               | 2019 |
| Telehealthcare for chronic obstructive pulmonary disease                                                                                          | McLean, , S, Nurmatov, U, Liu, JLY, Pagliari, C, Car, J; Sheikh, A                                                                                                         | 2011 |
| Telehealthcare for asthma                                                                                                                         | McLean, , S, Chandler, D, Nurmatov, U, Liu, JLY, Pagliari, C, Car, J; Sheikh, A                                                                                            | 2010 |
| Tocilizumab for rheumatoid arthritis                                                                                                              | Singh, , JA, Beg, S; Lopez-Olivo, MA                                                                                                                                       | 2010 |
| Thrombolysis for cerebral vein and dural sinus thrombosis                                                                                         | Ciccone, , A, Canhão, P, Falcão, F, Ferro, JM; Sterzi, R                                                                                                                   | 2004 |
| The effect of inotropes on morbidity and mortality in preterm infants with low systemic or organ blood flow                                       | Osborn, , DA, Paradis, M; Evans, NJ                                                                                                                                        | 2007 |
| Tight control of mild-moderate pre-existing or non-proteinuric gestational hypertension                                                           | Nabhan, , AF; Elsedawy, MM                                                                                                                                                 | 2011 |
| Topiramate for the prophylaxis of episodic migraine in adults                                                                                     | Linde, , M, Mulleners, WM, Chronicle, EP; McCrory, DC                                                                                                                      | 2013 |

|                                                                                                                                                                                                                                                 |                                                                                                                                |      |
|-------------------------------------------------------------------------------------------------------------------------------------------------------------------------------------------------------------------------------------------------|--------------------------------------------------------------------------------------------------------------------------------|------|
| Transcutaneous electrical nerve stimulation (TENS) for the treatment of rheumatoid arthritis in the hand                                                                                                                                        | Brosseau, , L, Yonge, KA, Welch, V, Marchand, S, Judd, M, Wells, GA; Tugwell, P                                                | 2003 |
| Totally implantable vascular access devices for cystic fibrosis                                                                                                                                                                                 | A-Rahman, , AKM; Spencer, D                                                                                                    | 2012 |
| Transdermal fentanyl for cancer pain                                                                                                                                                                                                            | Hadley, , G, Derry, S, Moore, RA; Wiffen, PJ                                                                                   | 2013 |
| The effect of pharmacist-provided non-dispensing services on patient outcomes, health service utilisation and costs in low- and middle-income countries                                                                                         | Pande, , S, Hiller, JE, Nkansah, N; Bero, L                                                                                    | 2013 |
| Topiramate for neuropathic pain and fibromyalgia in adults                                                                                                                                                                                      | Wiffen, , PJ, Derry, S, Lunn, MPT; Moore, RA                                                                                   | 2013 |
| Topotecan for ovarian cancer                                                                                                                                                                                                                    | Lihua, , P, Chen, XY; Wu, T                                                                                                    | 2008 |
| Transfusion of red blood cells stored for shorter versus longer duration for all conditions                                                                                                                                                     | Shah, , A, Brunskill, SJ, Desborough, MJR, Doree, C, Trivella, M; Stanworth, SJ                                                | 2018 |
| The role of high-frequency oscillations in epilepsy surgery planning                                                                                                                                                                            | Gloss, , D, Nevitt, SJ; Staba, R                                                                                               | 2017 |
| Tobacco cessation interventions for young people                                                                                                                                                                                                | Fanshawe, , TR, Halliwell, W, Lindson, N, Aveyard, P, Livingstone-Banks, J; Hartmann-Boyce, J                                  | 2017 |
| Topically applied anaesthetics for treating perineal pain after childbirth                                                                                                                                                                      | Hedayati, , H, Parsons, J; Crowther, CA                                                                                        | 2005 |
| The Epley (canalith repositioning) manoeuvre for benign paroxysmal positional vertigo                                                                                                                                                           | Hilton, , MP; Pinder, DK                                                                                                       | 2014 |
| Tolerability of selective cyclooxygenase 2 inhibitors used for the treatment of rheumatological manifestations of inflammatory bowel disease                                                                                                    | Miao, , XP, Li, JS, Ouyang, Q, Hu, RW, Zhang, Y; Li, HY                                                                        | 2014 |
| Thrombolysis (different doses, routes of administration and agents) for acute ischaemic stroke                                                                                                                                                  | Wardlaw, , JM, Koumellis, P; Liu, M                                                                                            | 2013 |
| Therapeutic ultrasound for osteoarthritis of the knee or hip                                                                                                                                                                                    | Rutjes, , AWS, Nüesch, E, Sterchi, R; Jüni, P                                                                                  | 2010 |
| Third generation cephalosporins versus conventional antibiotics for treating acute bacterial meningitis                                                                                                                                         | Prasad, , K, Kumar, A, Singhal, T; Gupta, PK                                                                                   | 2007 |
| Topiramate for acute affective episodes in bipolar disorder in adults                                                                                                                                                                           | Pigott, , K, Galizia, I, Vasudev, K, Watson, S, Geddes, J; Young, AH                                                           | 2016 |
| Tenofovir or zidovudine in three-drug combination therapy with one nucleoside reverse transcriptase inhibitor and one non-nucleoside reverse transcriptase inhibitor for initial treatment of HIV infection in antiretroviral-naïve individuals | Spaulding, , A, Rutherford, GW; Siegfried, N                                                                                   | 2010 |
| Tonsillectomy or adenotonsillectomy versus non-surgical treatment for chronic/recurrent acute tonsillitis                                                                                                                                       | Burton, , MJ, Glasziou, PP, Chong, LY; Venekamp, RP                                                                            | 2014 |
| Taxane-containing regimens for metastatic breast cancer                                                                                                                                                                                         | Gheri, , D, Willson, ML, Chan, MMK, Simes, J, Donoghue, E; Wilcken, N                                                          | 2015 |
| Topical pimecrolimus for eczema                                                                                                                                                                                                                 | Ashcroft, , DM, Chen, LC, Garside, R, Stein, K; Williams, HC                                                                   | 2007 |
| Telephone consultation and triage: effects on health care use and patient satisfaction                                                                                                                                                          | Bunn, , F, Byrne, G; Kendall, S                                                                                                | 2004 |
| Telephone delivered interventions for reducing morbidity and mortality in people with HIV infection                                                                                                                                             | Gentry, , S, van-Velthoven, MHMMT, Tudor Car, L; Car, J                                                                        | 2013 |
| The role of additional radiotherapy for primary central nervous system lymphoma                                                                                                                                                                 | Zacher, , J, Kasenda, B, Engert, A; Skoetz, N                                                                                  | 2014 |
| Tramadol with or without paracetamol (acetaminophen) for cancer pain                                                                                                                                                                            | Wiffen, , PJ, Derry, S; Moore, RA                                                                                              | 2017 |
| Total or near-total thyroidectomy versus subtotal thyroidectomy for multinodular non-toxic goitre in adults                                                                                                                                     | Ciocchi, , R, Trastulli, S, Randolph, J, Guarino, S, Di Rocco, G, Arezzo, A, D'Andrea, V, Santoro, A, Barczyński, M; Avenia, N | 2015 |
| Techniques for liver parenchymal transection in liver resection                                                                                                                                                                                 | Gurusamy, , KS, Pamecha, V, Sharma, D; Davidson, BR                                                                            | 2009 |
| Thalidomide for managing cancer cachexia                                                                                                                                                                                                        | Reid, , J, Mills, M, Cantwell, MM, Cardwell, CR, Murray, LJ; Donnelly, M                                                       | 2012 |
| Transcranial magnetic stimulation for the treatment of epilepsy                                                                                                                                                                                 | Chen, , R, Spencer, DC, Weston, J; Nolan, SJ                                                                                   | 2016 |
| Tracheal intubation with a flexible intubation scope versus other intubation techniques for obese patients requiring general anaesthesia                                                                                                        | Nicholson, , A, Smith, AF, Lewis, SR; Cook, TM                                                                                 | 2014 |
| The effects of idarubicin versus other anthracyclines for induction therapy of patients with newly diagnosed leukaemia                                                                                                                          | Li, , X, Xu, S, Tan, Y; Chen, J                                                                                                | 2015 |
| Topical silver for preventing wound infection                                                                                                                                                                                                   | Storm-Versloot, , MN, Vos, CG, Ubbink, DT; Vermeulen, H                                                                        | 2010 |
| The impact of user fees on access to health services in low- and middle-income countries                                                                                                                                                        | Lagarde, , M; Palmer, N                                                                                                        | 2011 |
| Thymectomy for non-thymomatous myasthenia gravis                                                                                                                                                                                                | Cea, , G, Benatar, M, Verdugo, RJ; Salinas, RA                                                                                 | 2013 |
| Thyrotropin-releasing hormone added to corticosteroids for women at risk of preterm birth for preventing neonatal respiratory disease                                                                                                           | Crowther, , CA, Alfirevic, Z, Han, S; Haslam, RR                                                                               | 2013 |
| Time-limited home-care reablement services for maintaining and improving the functional independence of older adults                                                                                                                            | Cochrane, , A, Furlong, M, McGilloway, S, Molloy, DW, Stevenson, M; Donnelly, M                                                | 2016 |
| Therapeutic monitoring of antiepileptic drugs for epilepsy                                                                                                                                                                                      | Tomson, , T, Dahl, ML; Kimland, E                                                                                              | 2007 |
| Theory-based interventions for contraception                                                                                                                                                                                                    | Lopez, , LM, Grey, TW, Chen, M, Tolley, EE; Stockton, LL                                                                       | 2016 |
| Transcutaneous electrostimulation for suspected placental insufficiency (diagnosed by Doppler studies)                                                                                                                                          | Say, , L, Gülmezoglu, AM; Hofmeyr, GJ                                                                                          | 1996 |

|                                                                                                                                                                                                    |                                                                                                                                        |      |
|----------------------------------------------------------------------------------------------------------------------------------------------------------------------------------------------------|----------------------------------------------------------------------------------------------------------------------------------------|------|
| Tests for detecting strabismus in children aged 1 to 6 years in the community                                                                                                                      | Hull, , S, Taylor, V, Balduzzi, S, Rahi, J, Schmucker, C, Virgili, G; Dahlmann-Noor, A                                                 | 2017 |
| Tiotropium versus long-acting beta-agonists for stable chronic obstructive pulmonary disease                                                                                                       | Chong, , J, Karner, C; Poole, P                                                                                                        | 2012 |
| Techniques of monitoring blood glucose during pregnancy for women with pre-existing diabetes                                                                                                       | Jones, , LV, Ray, A, Moy, FM; Buckley, BS                                                                                              | 2019 |
| The impact of surgical therapies for inflammatory bowel disease on female fertility                                                                                                                | Lee, , S, Crowe, M, Seow, CH, Kotze, PG, Kaplan, GG, Metcalfe, A, Ricciuto, A, Benchimol, EI; Kuenzig, ME                              | 2019 |
| Tramadol for osteoarthritis                                                                                                                                                                        | Toupin April, , K, Bisailon, J, Welch, V, Maxwell, LJ, Jüni, P, Rutjes, AWS, Husni, ME, Vincent, J, El Hindi, T, Wells, GA; Tugwell, P | 2019 |
| Topical agents and dressings for fungating wounds                                                                                                                                                  | Adderley, , UJ; Holt, IGS                                                                                                              | 2014 |
| Teicoplanin versus vancomycin for proven or suspected infection                                                                                                                                    | Cavalcanti, , AB, Goncalves, AR, Almeida, CS, Bugano, DDG; Silva, E                                                                    | 2010 |
| Training health professionals in smoking cessation                                                                                                                                                 | Carson, , KV, Verbiest, MEA, Crone, MR, Brinn, MP, Esterman, AJ, Assendelft, WJ; Smith, BJ                                             | 2012 |
| Topical corticosteroids for treating phimosis in boys                                                                                                                                              | Moreno, , G, Corbalán, J, Peñaloza, B; Pantoja, T                                                                                      | 2014 |
| The effects of anaesthetic agents on cortical mapping during neurosurgical procedures involving eloquent areas of the brain                                                                        | Adhikary, , SD, Thiruvengkatarajan, V, Babu, KS; Tharyan, P                                                                            | 2011 |
| Transarterial (chemo)embolisation for unresectable hepatocellular carcinoma                                                                                                                        | Oliveri, , RS, Wetterslev, J; Gluud, C                                                                                                 | 2011 |
| Topical agents or dressings for pain in venous leg ulcers                                                                                                                                          | Briggs, , M, Nelson, EA; Martyn-St James, M                                                                                            | 2012 |
| Tidal versus other forms of peritoneal dialysis for acute kidney injury                                                                                                                            | Jiang, , L, Zeng, R, Yang, K, Mi, DH, Tian, JH, Ma, B; Liu, Y                                                                          | 2012 |
| Telephone communication of HIV testing results for improving knowledge of HIV infection status                                                                                                     | Tudor Car, , L, Gentry, S, van-Velthoven, MHMMT; Car, J                                                                                | 2013 |
| Therapeutic ultrasound for venous leg ulcers                                                                                                                                                       | Cullum, , N; Liu, Z                                                                                                                    | 2017 |
| Thioridazine for dementia                                                                                                                                                                          | Kirchner, , V, Kelly, CA; Harvey, RJ                                                                                                   | 2001 |
| Therapeutic ultrasound for chronic low-back pain                                                                                                                                                   | Ebadi, , S, Henschke, N, Nakhostin Ansari, N, Fallah, E; van Tulder, MW                                                                | 2014 |
| The effect of adding inhaled corticosteroids to tiotropium and long-acting beta2-agonists for chronic obstructive pulmonary disease                                                                | Karner, , C; Cates, CJ                                                                                                                 | 2011 |
| The effects of antimicrobial therapy on bacterial vaginosis in non-pregnant women                                                                                                                  | Oduyebo, , OO, Anorlu, RI; Ogunisola, FT                                                                                               | 2009 |
| Telephone delivered interventions for preventing HIV infection in HIV-negative persons                                                                                                             | van-Velthoven, , MHMMT, Tudor Car, L, Gentry, S; Car, J                                                                                | 2013 |
| Timing and volume of fluid administration for patients with bleeding                                                                                                                               | Kwan, , I, Bunn, F, Chinnock, P; Roberts, I                                                                                            | 2014 |
| The WHO Health Promoting School framework for improving the health and well-being of students and their academic achievement                                                                       | Langford, , R, Bonell, CP, Jones, HE, Poulou, T, Murphy, SM, Waters, E, Komro, KA, Gibbs, LF, Magnus, D; Campbell, R                   | 2014 |
| Topical anti-inflammatory agents for seborrhoeic dermatitis of the face or scalp                                                                                                                   | Kastarinen, , H, Oksanen, T, Okokon, EO, Kiviniemi, VV, Airola, K, Jyrkkä, J, Oravilähti, T, Rannanheimo, PK; Verbeek, JH              | 2014 |
| Tools developed and disseminated by guideline producers to promote the uptake of their guidelines                                                                                                  | Flodgren, , G, Hall, AM, Goulding, L, Eccles, MP, Grimshaw, JM, Leng, GC; Shepperd, S                                                  | 2016 |
| Therapeutic interventions for disease progression in Huntington's disease                                                                                                                          | Mestre, , T, Ferreira, J, Coelho, MM, Rosa, M; Sampaio, C                                                                              | 2009 |
| Techniques for pelvic surgery in subfertility                                                                                                                                                      | Ahmad, , G, Watson, A, Vanderkerckhove, P; Lilford, R                                                                                  | 2006 |
| Topical antihistamines and mast cell stabilisers for treating seasonal and perennial allergic conjunctivitis                                                                                       | Castillo, , M, Scott, NW, Mustafa, MZ, Mustafa, MS; Azuara-Blanco, A                                                                   | 2015 |
| Frailty and the biochemical effects of recombinant human growth hormone in women after surgery for hip fracture                                                                                    | Herling, , SF, Dreijer, B, Wrist Lam, G, Thomsen, T; Møller, AM                                                                        | 2017 |
| Therapeutic interventions for symptomatic treatment in Huntington's disease                                                                                                                        | Mestre, , T, Ferreira, J, Coelho, MM, Rosa, M; Sampaio, C                                                                              | 2009 |
| Topical cyclosporine for atopic keratoconjunctivitis                                                                                                                                               | González-López, , JJ, López-Alcalde, J, Morcillo Laiz, R, Fernández Buenaga, R; Rebollada Fernández, G                                 | 2012 |
| Therapies for depression in Parkinson's disease                                                                                                                                                    | Ghazi-Noori, , S, Chung, TH, Deane, K, Rickards, HE; Clarke, CE                                                                        | 2003 |
| Techniques of flushing and reperfusion for liver transplantation                                                                                                                                   | Gurusamy, , KS, Naik, P, Abu-Amara, M, Fuller, B; Davidson, BR                                                                         | 2012 |
| Tramadol for neuropathic pain in adults                                                                                                                                                            | Duehmke, , RM, Derry, S, Wiffen, PJ, Bell, RF, Aldington, D; Moore, RA                                                                 | 2017 |
| Topical antifungals for seborrhoeic dermatitis                                                                                                                                                     | Okokon, , EO, Verbeek, JH, Ruotsalainen, JH, Ojo, OA; Bakhoya, VN                                                                      | 2015 |
| Topical herbal therapies for treating osteoarthritis                                                                                                                                               | Cameron, , M; Chrusasik, S                                                                                                             | 2013 |
| Transcatheter arterial chemoembolisation followed by three-dimensional conformal radiotherapy versus transcatheter arterial chemoembolisation alone for primary hepatocellular carcinoma in adults | Lu, , L, Zeng, J, Wen, Z, Tang, C; Xu, N                                                                                               | 2019 |
| Topical glyceryl trinitrate for rotator cuff disease                                                                                                                                               | Cumpston, , M, Johnston, RV, Wengier, L; Buchbinder, R                                                                                 | 2009 |
| Topical interventions for genital lichen sclerosis                                                                                                                                                 | Chi, , CC, Kirtschig, G, Baldo, M, Brackenbury, F, Lewis, F; Wojnarowska, F                                                            | 2011 |
| Thrombopoietin receptor agonists for prevention and treatment of chemotherapy-induced thrombocytopenia in patients with solid tumours                                                              | Zhang, , X, Chuai, Y, Nie, W, Wang, A; Dai, G                                                                                          | 2017 |

|                                                                                                                                                                             |                                                                                                            |      |
|-----------------------------------------------------------------------------------------------------------------------------------------------------------------------------|------------------------------------------------------------------------------------------------------------|------|
| Techniques of intrauterine fetal transfusion for women with red-cell isoimmunisation for improving health outcomes                                                          | Dodd, , JM, Windrim, RC; van Kamp, IL                                                                      | 2012 |
| Topical microbicides for prevention of sexually transmitted infections                                                                                                      | Obiero, , J, Mwethera, PG; Wiysonge, CS                                                                    | 2012 |
| Topical antibiotics for preventing surgical site infection in wounds healing by primary intention                                                                           | Heal, , CF, Banks, JL, Lepper, PD, Kontopantelis, E; van Driel, ML                                         | 2016 |
| Transarterial (chemo)embolisation versus no intervention or placebo intervention for liver metastases                                                                       | Riemsma, , RP, Bala, MM, Wolff, R; Kleijnen, J                                                             | 2013 |
| Tianma Gouteng Yin Formula for treating primary hypertension                                                                                                                | Zhang, , HW, Tong, J, Zhou, G, Jia, H; Jiang, JY                                                           | 2012 |
| Tongxinluo (Tong xin luo or Tong-xin-luo) capsule for unstable angina pectoris                                                                                              | Wu, , T, Harrison, RA, Chen, XY, Ni, J, Zhou, L, Qiao, J, Wang, Q, Wei, J, Duan, X; Zheng, J               | 2006 |
| Timed voiding for the management of urinary incontinence in adults                                                                                                          | Ostaszkievicz, , J, Johnston, L; Roe, B                                                                    | 2004 |
| Thrombopoietin mimetics for patients with myelodysplastic syndromes                                                                                                         | Dodillet, , H, Kreuzer, KA, Monsef, I; Skoetz, N                                                           | 2017 |
| Telerehabilitation for persons with multiple sclerosis                                                                                                                      | Khan, , F, Amatya, B, Kesselring, J; Galea, M                                                              | 2015 |
| Thioridazine for schizophrenia                                                                                                                                              | Fenton, , M, Rathbone, J; Reilly, J                                                                        | 2007 |
| Telephone counselling for smoking cessation                                                                                                                                 | Matkin, , W, Ordóñez-Mena, JM; Hartmann-Boyce, J                                                           | 2019 |
| Telephone interventions, delivered by healthcare professionals, for providing education and psychosocial support for informal caregivers of adults with diagnosed illnesses | Corry, , M, Neenan, K, Brabyn, S, Sheaf, G; Smith, V                                                       | 2019 |
| Topiramate versus carbamazepine monotherapy for epilepsy: an individual participant data review                                                                             | Nevitt, , SJ, Sudell, M, Tudur Smith, C; Marson, AG                                                        | 2019 |
| Training and supportive programs for palliative care volunteers in community settings                                                                                       | Horey, , D, Street, AF, O'Connor, M, Peters, L; Lee, SF                                                    | 2015 |
| The effect of social franchising on access to and quality of health services in low- and middle-income countries                                                            | Koehlmoos, , TP, Gazi, R, Hossain, SS; Zaman, K                                                            | 2009 |
| Timing of renal replacement therapy initiation for acute kidney injury                                                                                                      | Fayad, , AII, Buamscha, DG; Ciapponi, A                                                                    | 2018 |
| Tracheal gas insufflation for the prevention of morbidity and mortality in mechanically ventilated newborn infants                                                          | Davies, , MW; Woodgate, PG                                                                                 | 2002 |
| Topical non-steroidal anti-inflammatory agents for diabetic cystoid macular oedema                                                                                          | Sahoo, , S, Barua, A, Myint, KT, Haq, A, Abas, ABL; Nair, NS                                               | 2015 |
| Training interventions for improving telephone consultation skills in clinicians                                                                                            | Vaona, , A, Pappas, Y, Grewal, RS, Ajaz, M, Majeed, A; Car, J                                              | 2017 |
| Topical silver for treating infected wounds                                                                                                                                 | Vermeulen, , H, van Hattem, JM, Storm-Versloot, MN, Ubbink, DT; Westerbos, SJ                              | 2007 |
| Tirilazad for aneurysmal subarachnoid haemorrhage                                                                                                                           | Zhang, , S, Wang, L, Liu, M; Wu, B                                                                         | 2010 |
| Tinnitus Retraining Therapy (TRT) for tinnitus                                                                                                                              | Phillips, , JS; McFerran, D                                                                                | 2010 |
| Thrombolysis for acute ischaemic stroke                                                                                                                                     | Wardlaw, , JM, Murray, V, Berge, E; del Zoppo, GJ                                                          | 2014 |
| Traditional Chinese Medicine herbs for stopping bleeding from haemorrhoids                                                                                                  | Gan, , T, Liu, YD, Wang, Y; Yang, J                                                                        | 2010 |
| Total serum bile acids or serum bile acid profile, or both, for the diagnosis of intrahepatic cholestasis of pregnancy                                                      | Manzotti, , C, Casazza, G, Stimac, T, Nikolova, D; Gluud, C                                                | 2019 |
| Tong-xin-luo capsule for patients with coronary heart disease after percutaneous coronary intervention                                                                      | Mao, , C, Fu, XH, Yuan, JQ, Yang, ZY, Chung, VCH, Qin, Y, Huang, Y, Tam, WWS, Kwong, JSW, Xie, W; Tang, JL | 2015 |
| Thienopyridine derivatives versus aspirin for preventing stroke and other serious vascular events in high vascular risk patients                                            | Sudlow, , CLM, Mason, G, Maurice, JB, Wedderburn, CJ; Hankey, GJ                                           | 2009 |
| Therapy-based rehabilitation services for stroke patients at home                                                                                                           | Trialists, Outpatient Service                                                                              | 2003 |
| Therapist-supported Internet cognitive behavioural therapy for anxiety disorders in adults                                                                                  | Olthuis, , JV, Watt, MC, Bailey, K, Hayden, JA; Stewart, SH                                                | 2016 |
| Thyroxine replacement for subfertile women with euthyroid autoimmune thyroid disease or subclinical hypothyroidism                                                          | Akhtar, , MA, Agrawal, R, Brown, J, Sajjad, Y; Craciunas, L                                                | 2019 |
| The medical use of cannabis for reducing morbidity and mortality in patients with HIV/AIDS                                                                                  | Lutge, , EE, Gray, A; Siegfried, N                                                                         | 2013 |
| Topical anaesthetic or vasoconstrictor preparations for flexible fibre-optic nasal pharyngoscopy and laryngoscopy                                                           | Sunkaraneni, , VS; Jones, SEM                                                                              | 2011 |
| Tonsillectomy or adenotonsillectomy versus non-surgical management for obstructive sleep-disordered breathing in children                                                   | Venekamp, , RP, Hearne, BJ, Chandrasekharan, D, Blackshaw, H, Lim, J; Schilder, AGM                        | 2015 |
| Therapeutic interventions for Burkitt lymphoma in children                                                                                                                  | Okebe, , JU, Skoetz, N, Meremikwu, MM; Richards, S                                                         | 2011 |
| Tranexamic acid for patients with nasal haemorrhage (epistaxis)                                                                                                             | Joseph, , J, Martinez-Devesa, P, Bellorini, J; Burton, MJ                                                  | 2018 |
| Terlipressin versus placebo or no intervention for people with cirrhosis and hepatorenal syndrome                                                                           | Allegretti, , AS, Israelsen, M, Krag, A, Jovani, M, Goldin, AH, Schulman, AR, Winter, RW; Gluud, LL        | 2017 |
| Tonsillectomy for periodic fever, aphthous stomatitis, pharyngitis and cervical adenitis syndrome (PFAPA)                                                                   | Burton, , MJ, Pollard, AJ, Ramsden, JD, Chong, LY; Venekamp, RP                                            | 2014 |
| Topical antifungal treatments for tinea cruris and tinea corporis                                                                                                           | El-Gohary, , M, van Zuuren, EJ, Fedorowicz, Z, Burgess, H, Doney, L, Stuart, B, Moore, M; Little, P        | 2014 |
| Thrombolytic therapy for pulmonary embolism                                                                                                                                 | Hao, , Q, Dong, BR, Yue, J, Wu, T; Liu, GJ                                                                 | 2018 |
| Therapeutic exercise for people with amyotrophic lateral sclerosis or motor neuron disease                                                                                  | Dal Bello-Haas, , V; Florence, JM                                                                          | 2013 |

|                                                                                                                                                     |                                                                                                                             |      |
|-----------------------------------------------------------------------------------------------------------------------------------------------------|-----------------------------------------------------------------------------------------------------------------------------|------|
| Timing of surgery for aneurysmal subarachnoid haemorrhage                                                                                           | Whitfield, , PC; Kirkpatrick, P                                                                                             | 2001 |
| Topical lidocaine for neuropathic pain in adults                                                                                                    | Derry, , S, Wiffen, PJ, Moore, RA; Quinlan, J                                                                               | 2014 |
| Tiagabine in the maintenance treatment of bipolar disorder                                                                                          | Vasudev, , A, Macritchie, K, Rao, SNK, Geddes, J; Young, AH                                                                 | 2011 |
| Topical anaesthesia alone versus topical anaesthesia with intracameral lidocaine for phacoemulsification                                            | Ezra, , DG; Allan, BDS                                                                                                      | 2007 |
| Training to recognise the early signs of recurrence in schizophrenia                                                                                | Morriss, , R, Vinjamuri, I, Faizal, MA, Bolton, CA; McCarthy, JP                                                            | 2013 |
| The role of maintenance therapy in acute promyelocytic leukemia in the first complete remission                                                     | Muchtar, , E, Vidal, L, Ram, R, Gafter-Gvili, A, Shpilberg, O; Raanani, P                                                   | 2013 |
| Temozolomide for high grade glioma                                                                                                                  | Hart, , MG, Garside, R, Rogers, G, Stein, K; Grant, R                                                                       | 2013 |
| Thrombolysis for acute deep vein thrombosis                                                                                                         | Watson, , L, Broderick, C; Armon, MP                                                                                        | 2016 |
| Timing of dornase alfa inhalation for cystic fibrosis                                                                                               | Dentice, , R; Elkins, M                                                                                                     | 2018 |
| Traditional birth attendant training for improving health behaviours and pregnancy outcomes                                                         | Sibley, , LM, Sipe, TA; Barry, D                                                                                            | 2012 |
| Thermotherapy for treating rheumatoid arthritis                                                                                                     | Welch, , V, Brosseau, L, Casimiro, L, Judd, M, Shea, B, Tugwell, P; Wells, GA                                               | 2002 |
| Topical antibiotics without steroids for chronically discharging ears with underlying eardrum perforations                                          | Macfadyen, , CA, Acuin, JM; Gamble, CL                                                                                      | 2005 |
| Traditional Chinese herbal medicine for vascular dementia                                                                                           | Chan, , ESY, Bautista, DT, Zhu, Y, You, Y, Long, JT, Li, W; Chen, C                                                         | 2018 |
| Thermotherapy for treatment of osteoarthritis                                                                                                       | Brosseau, , L, Yonge, KA, Welch, V, Marchand, S, Judd, M, Wells, GA; Tugwell, P                                             | 2003 |
| Thoracic stent graft versus surgery for thoracic aneurysm                                                                                           | Abraha, , I, Romagnoli, C, Montedori, A; Cirocchi, R                                                                        | 2016 |
| Topiramate for essential tremor                                                                                                                     | Bruno, , E, Nicoletti, A, Quattrocchi, G, Allegra, R, Filippini, G, Colosimo, C; Zappia, M                                  | 2017 |
| Topical cystic fibrosis transmembrane conductance regulator gene replacement for cystic fibrosis-related lung disease                               | Perry, , LA, Penny-Dimri, JC, Aslam, AA, Lee, TWR; Southern, KW                                                             | 2016 |
| TNF-alpha inhibitors for ankylosing spondylitis                                                                                                     | Maxwell, , LJ, Zochling, J, Boonen, A, Singh, JA, Veras, MMS, Tanjong Ghogomu, E, Benkhalti Jandu, M, Tugwell, P; Wells, GA | 2015 |
| The effect of financial incentives on the quality of health care provided by primary care physicians                                                | Scott, , A, Sivey, P, Ait Ouakrim, D, Willenberg, L, Naccarella, L, Furler, J; Young, D                                     | 2011 |
| Topiramate add-on for drug-resistant partial epilepsy                                                                                               | Pulman, , J, Jette, N, Dykeman, J, Hemming, K, Hutton, JL; Marson, AG                                                       | 2014 |
| Tiotropium versus ipratropium bromide for chronic obstructive pulmonary disease                                                                     | Cheyne, , L, Irvin-Sellers, MJ; White, J                                                                                    | 2015 |
| Topical treatments for scalp psoriasis                                                                                                              | Schlager, , JG, Rosumeck, S, Werner, RN, Jacobs, A, Schmitt, J, Schlager, C; Nast, A                                        | 2016 |
| Tobacco packaging design for reducing tobacco use                                                                                                   | McNeill, , A, Gravelly, S, Hitchman, SC, Bauld, L, Hammond, D; Hartmann-Boyce, J                                            | 2017 |
| Time course for blood pressure lowering of dihydropyridine calcium channel blockers                                                                 | Ghamami, , N, Chiang, SHY, Dormuth, C; Wright, JM                                                                           | 2014 |
| Totally percutaneous versus surgical cut-down femoral artery access for elective bifurcated abdominal endovascular aneurysm repair                  | Gimzewska, , M, Jackson, AIR, Yeoh, SE; Clarke, M                                                                           | 2017 |
| Techniques for caesarean section                                                                                                                    | Hofmeyr, , GJ, Mathai, M, Shah, AN; Novikova, N                                                                             | 2008 |
| Timing of breast surgery in premenopausal breast cancer patients                                                                                    | Samuel, , M, Khin, LW, Brennan, VK; Yong, WS                                                                                | 2011 |
| Transabdominal amnioinfusion for improving fetal outcomes after oligohydramnios secondary to preterm prelabour rupture of membranes before 26 weeks | Van Teeffelen, , S, Pajkrt, E, Willekes, C, Van Kuijk, SMJ; Mol, BWJ                                                        | 2013 |
| Tiagabine for acute affective episodes in bipolar disorder                                                                                          | Vasudev, , A, Macritchie, K, Rao, SK, Geddes, J; Young, AH                                                                  | 2012 |
| The impact of conditional cash transfers on health outcomes and use of health services in low and middle income countries                           | Lagarde, , M, Haines, A; Palmer, N                                                                                          | 2009 |
| Thyroid hormones for preventing neurodevelopmental impairment in preterm infants                                                                    | Osborn, DA                                                                                                                  | 2001 |
| Thrombophilia testing for prevention of recurrent venous thromboembolism                                                                            | Cohn, , DM, Vansenne, F, de Borgie, CA; Middeldorp, S                                                                       | 2012 |
| Topical capsaicin (low concentration) for chronic neuropathic pain in adults                                                                        | Derry, , S; Moore, RA                                                                                                       | 2012 |
| The effect of different methods of remuneration on the behaviour of primary care dentists                                                           | Brocklehurst, , P, Price, J, Glenny, AM, Tickle, M, Birch, S, Mertz, E; Grytten, J                                          | 2013 |
| Thiazide diuretics and the risk of hip fracture                                                                                                     | Aung, , K; Htay, T                                                                                                          | 2011 |
| The impact of biological interventions for ulcerative colitis on health-related quality of life                                                     | LeBlanc, , K, Mosli, MH, Parker, CE; MacDonald, JK                                                                          | 2015 |
| Thalidomide and thalidomide analogues for induction of remission in Crohn's disease                                                                 | Srinivasan, , R; Akobeng, AK                                                                                                | 2009 |
| Thalidomide and thalidomide analogues for maintenance of remission in Crohn's disease                                                               | Akobeng, , AK; Stokkers, PC                                                                                                 | 2009 |
| Topical corticosteroids as adjunctive therapy for bacterial keratitis                                                                               | Herretes, , S, Wang, X; Reyes, JMG                                                                                          | 2014 |



|                                                                                                                                                               |                                                                                                                                                                               |      |
|---------------------------------------------------------------------------------------------------------------------------------------------------------------|-------------------------------------------------------------------------------------------------------------------------------------------------------------------------------|------|
| Therapeutic ultrasound for acute ankle sprains                                                                                                                | van den Bekerom, , MPJ, van der Windt, DAWM, ter Riet, G, van der Heijden, GJ; Bouter, LM                                                                                     | 2011 |
| Technique modifications for reducing the risks from amniocentesis or chorionic villus sampling                                                                | Mujezinovic, , F; Alfirevic, Z                                                                                                                                                | 2012 |
| Telerehabilitation services for stroke                                                                                                                        | Laver, , KE, Schoene, D, Crotty, M, George, S, Lannin, NA; Sherrington, C                                                                                                     | 2013 |
| The role of alpha blockers prior to removal of urethral catheter for acute urinary retention in men                                                           | Fisher, , E, Subramonian, K; Omar, MI                                                                                                                                         | 2014 |
| Tranexamic acid for reducing mortality in emergency and urgent surgery                                                                                        | Perel, , P, Ker, K, Morales Uribe, CH; Roberts, I                                                                                                                             | 2013 |
| Thrombolytic agents for arterial and venous thromboses in neonates                                                                                            | John, , CM; Harkensee, C                                                                                                                                                      | 2005 |
| Teriflunomide for multiple sclerosis                                                                                                                          | He, , D, Zhang, C, Zhao, X, Zhang, Y, Dai, Q, Li, Y; Chu, L                                                                                                                   | 2016 |
| Tiagabine add-on for drug-resistant partial epilepsy                                                                                                          | Pulman, , J, Hutton, JL; Marson, AG                                                                                                                                           | 2014 |
| Traditional corticosteroids for induction of remission in Crohn's disease                                                                                     | Benchimol, , EI, Seow, CH, Steinhart, AH; Griffiths, AM                                                                                                                       | 2008 |
| Traditional Chinese herbal products for stable angina                                                                                                         | Zhuo, , Q, Yuan, Z, Chen, H; Wu, T                                                                                                                                            | 2010 |
| TNF- $\alpha$ blockers for the treatment of Kawasaki disease in children                                                                                      | Yamaji, , N, da Silva Lopes, K, Shoda, T, Ishitsuka, K, Kobayashi, T, Ota, E; Mori, R                                                                                         | 2019 |
| Topical and systemic antifungal therapy for chronic rhinosinusitis                                                                                            | Head, , K, Sharp, S, Chong, LY, Hopkins, C; Philpott, C                                                                                                                       | 2018 |
| Tele dermatology for diagnosing skin cancer in adults                                                                                                         | Chuchu, , N, Dinnes, J, Takwoingi, Y, Matin, RN, Bayliss, SE, Davenport, C, Moreau, JF, Bassett, O, Godfrey, K, O'Sullivan, C, Walter, FM, Motley, R, Deeks, JJ; Williams, HC | 2018 |
| Written information for patients (or parents of child patients) to reduce the use of antibiotics for acute upper respiratory tract infections in primary care | O'Sullivan, , JW, Harvey, RT, Glasziou, PP; McCullough, A                                                                                                                     | 2016 |
| Volume-targeted versus pressure-limited ventilation in neonates                                                                                               | Klingenberg, , C, Wheeler, KI, McCallion, N, Morley, CJ; Davis, PG                                                                                                            | 2017 |
| Washout policies in long-term indwelling urinary catheterisation in adults                                                                                    | Shepherd, , AJ, Mackay, WG; Hagen, S                                                                                                                                          | 2017 |
| Whole grain foods for the prevention of type 2 diabetes mellitus                                                                                              | Priebe, , M, van Binsbergen, J, de Vos, R; Vonk, RJ                                                                                                                           | 2008 |
| Vitamins C and E for asthma and exercise-induced bronchoconstriction                                                                                          | Wilkinson, , M, Hart, A, Milan, SJ; Sugumar, K                                                                                                                                | 2014 |
| Zotepine for schizophrenia                                                                                                                                    | DeSilva, , P, Fenton, M; Rathbone, J                                                                                                                                          | 2006 |
| Yoga as part of a package of care versus standard care for schizophrenia                                                                                      | Broderick, , J; Vancampfort, D                                                                                                                                                | 2017 |
| Water-based exercises for improving activities of daily living after stroke                                                                                   | Mehrholz, , J, Kugler, J; Pohl, M                                                                                                                                             | 2011 |
| Zotepine versus other atypical antipsychotics for schizophrenia                                                                                               | Subramanian, , S, Rummel-Kluge, C, Hunger, H, Schmid, F, Schwarz, S, Kissling, W, Leucht, S; Komossa, K                                                                       | 2010 |
| Zinc supplements for preventing otitis media                                                                                                                  | Gulani, , A; Sachdev, HS                                                                                                                                                      | 2014 |
| Vitamin supplementation for preventing miscarriage                                                                                                            | Balogun, , OO, da Silva Lopes, K, Ota, E, Takemoto, Y, Rumbold, A, Takegata, M; Mori, R                                                                                       | 2016 |
| Yellow fever vaccine for patients with HIV infection                                                                                                          | Barte, , H, Horvath, TH; Rutherford, GW                                                                                                                                       | 2014 |
| Vitamin K antagonists versus antiplatelet therapy after transient ischaemic attack or minor ischaemic stroke of presumed arterial origin                      | De Schryver, , ELLM, Algra, A, Kappelle, LJ, van Gijn, J; Koudstaal, PJ                                                                                                       | 2012 |
| Voxel-based morphometry for separation of schizophrenia from other types of psychosis in first episode psychosis                                              | Palaniyappan, , L, Maayan, N, Bergman, H, Davenport, C, Adams, CE; Soares-Weiser, K                                                                                           | 2015 |
| Walk-in clinics versus physician offices and emergency rooms for urgent care and chronic disease management                                                   | Chen, , CE, Chen, CT, Hu, J; Mehrotra, A                                                                                                                                      | 2017 |
| Vitamin K for upper gastrointestinal bleeding in people with acute or chronic liver diseases                                                                  | Martí-Carvajal, , AJ; Solà, I                                                                                                                                                 | 2015 |
| Vitamin K antagonists versus low-molecular-weight heparin for the long term treatment of symptomatic venous thromboembolism                                   | Andras, , A, Sala Tenna, A; Stewart, M                                                                                                                                        | 2017 |
| Water-based exercise for adults with asthma                                                                                                                   | Grande, , AJ, Silva, V, Andriolo, BNG, Riera, R, Parra, SA; Peccin, MS                                                                                                        | 2014 |
| Zuclopenthixol acetate for acute schizophrenia and similar serious mental illnesses                                                                           | Jayakody, , K, Gibson, RC, Kumar, A; Gunadasa, S                                                                                                                              | 2012 |
| Whole brain radiotherapy for the treatment of newly diagnosed multiple brain metastases                                                                       | Tsao, , MN, Xu, W, Wong, RKS, Lloyd, N, Laperriere, N, Sahgal, A, Rakovitch, E; Chow, E                                                                                       | 2018 |
| Weight loss interventions for chronic asthma                                                                                                                  | Adeniyi, , FB; Young, T                                                                                                                                                       | 2012 |
| Written emotional disclosure for asthma                                                                                                                       | Paudyal, , P, Hine, P, Theadom, A, Apfelbacher, CJ, Jones, CJ, Yorke, J, Hankins, M; Smith, HE                                                                                | 2014 |
| Workload and surgeon's specialty for outcome after colorectal cancer surgery                                                                                  | Archampong, , D, Borowski, D, Wille-Jørgensen, P; Iversen, LH                                                                                                                 | 2012 |
| Yoga for asthma                                                                                                                                               | Yang, , ZY, Zhong, HB, Mao, C, Yuan, JQ, Huang, YF, Wu, XY, Gao, YM; Tang, JL                                                                                                 | 2016 |
| Whole-body vibration training for patients with neurodegenerative disease                                                                                     | Sitjà Rabert, , M, Rigau Comas, D, Fort Vanmeerhaeghe, A, Santoyo Medina, C, Roqué i Figuls, M, Romero-Rodríguez, D; Bonfill Cosp, X                                          | 2012 |
| Vitamin E for intermittent claudication                                                                                                                       | Kleijnen, , J; Mackerras, D                                                                                                                                                   | 1998 |

|                                                                                                                                              |                                                                                                                                 |      |
|----------------------------------------------------------------------------------------------------------------------------------------------|---------------------------------------------------------------------------------------------------------------------------------|------|
| Wound drainage after axillary dissection for carcinoma of the breast                                                                         | Thomson, , DR, Sadideen, H; Furniss, D                                                                                          | 2013 |
| Workplace interventions to prevent work disability in workers on sick leave                                                                  | van Vilsteren, , M, van Oostrom, SH, de Vet, HCW, Franche, RL, Boot, CRL; Anema, JR                                             | 2015 |
| Zuclopenthixol versus placebo for schizophrenia                                                                                              | Lacey, , M; Jayaram, MB                                                                                                         | 2015 |
| Vitamins for epilepsy                                                                                                                        | Ranganathan, , LN; Ramaratnam, S                                                                                                | 2005 |
| Zinc supplementation for mental and motor development in children                                                                            | Gogia, , S; Sachdev, HS                                                                                                         | 2012 |
| Washed versus unwashed red blood cells for transfusion for the prevention of morbidity and mortality in preterm infants                      | Keir, , AK, Wilkinson, D, Andersen, C; Stark, MJ                                                                                | 2016 |
| Workplace interventions for treatment of occupational asthma                                                                                 | de Groene, , GJ, Pal, TM, Beach, J, Tarlo, SM, Spreeuwiers, D, Frings-Dresen, MHW, Mattioli, S; Verbeek, JH                     | 2011 |
| Yoga for the primary prevention of cardiovascular disease                                                                                    | Hartley, , L, Dyakova, M, Holmes, J, Clarke, A, Lee, MS, Ernst, E; Rees, K                                                      | 2014 |
| Vitamin K for the primary prevention of cardiovascular disease                                                                               | Hartley, , L, Clar, C, Ghannam, O, Flowers, N, Stranges, S; Rees, K                                                             | 2015 |
| Workplace interventions for smoking cessation                                                                                                | Cahill, , K; Lancaster, T                                                                                                       | 2014 |
| Water for preventing urinary stones                                                                                                          | Bao, , Y; Wei, Q                                                                                                                | 2012 |
| Zinc supplements for treating thalassaemia and sickle cell disease                                                                           | Swe, , KMM, Abas, ABL, Bhardwaj, A, Barua, A; Nair, NS                                                                          | 2013 |
| Vitamin E supplementation in people with cystic fibrosis                                                                                     | Okebukola, , PO, Kansra, S; Barrett, J                                                                                          | 2017 |
| Wound-care teams for preventing and treating pressure ulcers                                                                                 | Moore, , ZEH, Webster, J; Samuriwo, R                                                                                           | 2015 |
| Zonisamide add-on therapy for focal epilepsy                                                                                                 | Brigo, , F, Lattanzi, S, Igwe, SC, Behzadifar, M; Bragazzi, NL                                                                  | 2018 |
| Zinc supplementation for the prevention of pneumonia in children aged 2 months to 59 months                                                  | Lassi, , ZS, Moin, A; Bhutta, ZA                                                                                                | 2016 |
| Vitamin E supplementation in pregnancy                                                                                                       | Rumbold, , A, Ota, E, Hori, H, Miyazaki, C; Crowther, CA                                                                        | 2015 |
| Yoga treatment for chronic non-specific low back pain                                                                                        | Wieland, , LS, Skoetz, N, Pilkington, K, Vempati, R, D'Adamo, CR; Berman, BM                                                    | 2017 |
| Workplace pedometer interventions for increasing physical activity                                                                           | Freak-Poli, , RLA, Cumpston, M, Peeters, A; Clemes, SA                                                                          | 2013 |
| Vitrectomy with internal limiting membrane (ILM) peeling versus vitrectomy with no peeling for idiopathic full-thickness macular hole (FTMH) | Spiteri Cornish, , K, Lois, N, Scott, N, Burr, J, Cook, J, Boachie, C, Tadayoni, R, la Cour, M, Christensen, U; Kwok, A         | 2013 |
| Water fluoridation for the prevention of dental caries                                                                                       | Iheozor-Ejiofor, , Z, Worthington, HV, Walsh, T, O'Malley, L, Clarkson, JE, Macey, R, Alam, R, Tugwell, P, Welch, V; Glenny, AM | 2015 |
| Wound drainage following groin dissection for malignant disease in adults                                                                    | Thomson, , DR, Sadideen, H; Furniss, D                                                                                          | 2014 |
| Whole grain cereals for the primary or secondary prevention of cardiovascular disease                                                        | Kelly, , SAM, Hartley, L, Loveman, E, Colquitt, JL, Jones, HM, Al-Khudairy, L, Clar, C, Germanò, R, Lunn, HR, Frost, G; Rees, K | 2017 |
| Water-based exercise training for chronic obstructive pulmonary disease                                                                      | McNamara, , RJ, McKeough, ZJ, McKenzie, DK; Alison, JA                                                                          | 2013 |
| Voluntary counseling and testing (VCT) for changing HIV-related risk behavior in developing countries                                        | Fonner, , VA, Denison, J, Kennedy, CE, O'Reilly, K; Sweat, M                                                                    | 2012 |
| Xylitol for preventing acute otitis media in children up to 12 years of age                                                                  | Azarpazhooh, , A, Lawrence, HP; Shah, PS                                                                                        | 2016 |
| Work-break schedules for preventing musculoskeletal symptoms and disorders in healthy workers                                                | Luger, , T, Maher, CG, Rieger, MA; Steinhilber, B                                                                               | 2019 |
| Zinc supplementation for preventing mortality, morbidity, and growth failure in children aged 6 months to 12 years of age                    | Mayo-Wilson, , E, Junior, JA, Imdad, A, Dean, S, Chan, XHS, Chan, ES, Jaswal, A; Bhutta, ZA                                     | 2014 |
| Zinc supplementation as an adjunct to antibiotics in the treatment of pneumonia in children 2 to 59 months of age                            | Haider, , BA, Lassi, ZS, Ahmed, A; Bhutta, ZA                                                                                   | 2011 |
| Vitamin E supplementation for prevention of morbidity and mortality in preterm infants                                                       | Brion, , LP, Bell, EF; Raghuveer, TS                                                                                            | 2003 |
| Yoga for treating urinary incontinence in women                                                                                              | Wieland, , LS, Shrestha, N, Lassi, ZS, Panda, S, Chiaramonte, D; Skoetz, N                                                      | 2019 |
| Vocational rehabilitation for people with severe mental illness                                                                              | Crowther, , R, Marshall, M, Bond, GR; Huxley, P                                                                                 | 2001 |
| Xylitol-containing products for preventing dental caries in children and adults                                                              | Riley, , P, Moore, D, Ahmed, F, Sharif, MO; Worthington, HV                                                                     | 2015 |
| Which anticholinergic drug for overactive bladder symptoms in adults                                                                         | Madhuvrata, , P, Cody, JD, Ellis, G, Herbison, GP; Hay-Smith, EJC                                                               | 2012 |
| Weight reduction for non-alcoholic fatty liver disease                                                                                       | Peng, , L, Wang, J; Li, F                                                                                                       | 2011 |
| Zidovudine (AZT) versus AZT plus didanosine (ddI) versus AZT plus zalcitabine (ddC) in HIV infected adults                                   | Darbyshire, , J, Foulkes, M, Peto, R, Duncan, W, Babiker, A, Collins, R, Hughes, M, Peto, TEA; Walker, SA                       | 2000 |
| Zinc supplementation for the prevention of type 2 diabetes mellitus in adults with insulin resistance                                        | El Dib, , R, Gameiro, OLF, Ogata, MSP, Módolo, NSP, Braz, LG, Jorge, EC, do Nascimento Junior, P; Beletate, V                   | 2015 |
| Vortioxetine for depression in adults                                                                                                        | Koesters, , M, Ostuzzi, G, Guaiana, G, Breilmann, J; Barbui, C                                                                  | 2017 |
| Water infusion versus air insufflation for colonoscopy                                                                                       | Hafner, , S, Zolk, K, Radaelli, F, Otte, J, Rabenstein, T; Zolk, O                                                              | 2015 |

|                                                                                                                                                                                                                              |                                                                                                                                                          |      |
|------------------------------------------------------------------------------------------------------------------------------------------------------------------------------------------------------------------------------|----------------------------------------------------------------------------------------------------------------------------------------------------------|------|
| Zinc supplementation for tinnitus                                                                                                                                                                                            | Person, , OC, Puga, MES, da Silva, EMK; Torloni, MR                                                                                                      | 2016 |
| Yoga for improving health-related quality of life, mental health and cancer-related symptoms in women diagnosed with breast cancer                                                                                           | Cramer, , H, Lauche, R, Klose, P, Lange, S, Langhorst, J; Dobos, GJ                                                                                      | 2017 |
| Xiongshao for restenosis after percutaneous coronary intervention in patients with coronary heart disease                                                                                                                    | Zheng, , GH, Liu, JP, Chu, JF, Mei, L; Chen, HY                                                                                                          | 2013 |
| Vitrectomy for idiopathic macular hole                                                                                                                                                                                       | Parravano, , M, Giansanti, F, Eandi, CM, Yap, YC, Rizzo, S; Virgili, G                                                                                   | 2015 |
| Vitamin E for antipsychotic-induced tardive dyskinesia                                                                                                                                                                       | Soares-Weiser, , K, Maayan, N; Bergman, H                                                                                                                | 2018 |
| Withdrawal of immunosuppressant or biologic therapy for patients with quiescent Crohn's disease                                                                                                                              | Boyapati, , RK, Torres, J, Palmela, C, Parker, CE, Silverberg, OM, Upadhyaya, SD, Nguyen, TM; Colombel, JF                                               | 2018 |
| Vitamin K supplementation for cystic fibrosis                                                                                                                                                                                | Jagannath, , VA, Thaker, V, Chang, AB; Price, AI                                                                                                         | 2017 |
| Whole-body cryotherapy (extreme cold air exposure) for preventing and treating muscle soreness after exercise in adults                                                                                                      | Costello, , JT, Baker, PRA, Minett, GM, Bieuzen, F, Stewart, IB; Bleakley, C                                                                             | 2015 |
| Zonisamide for neuropathic pain in adults                                                                                                                                                                                    | Moore, , RA, Wiffen, PJ, Derry, S; Lunn, MPT                                                                                                             | 2015 |
| Vitamin K prior to preterm birth for preventing neonatal periventricular haemorrhage                                                                                                                                         | Crowther, , CA; Crosby, DD                                                                                                                               | 2010 |
| Yoga as part of a package of care versus non-standard care for schizophrenia                                                                                                                                                 | Broderick, , J; Vancampfort, D                                                                                                                           | 2019 |
| Xpert MTB/RIF and Xpert MTB/RIF Ultra for pulmonary tuberculosis and rifampicin resistance in adults                                                                                                                         | Horne, , DJ, Kohli, M, Zifodya, JS, Schiller, I, Dendukuri, N, Tollefson, D, Schumacher, SG, Ochodo, EA, Pai, M; Steingart, KR                           | 2019 |
| Randomised, phase II, placebo-controlled, trial of fulvestrant plus vandetanib in postmenopausal women with bone only or bone predominant, hormone-receptor-positive metastatic breast cancer (MBC): the OCOG ZAMBONEY study | Clemons, , MJ, Cochrane, B, Pond, GR, Califaretti, N, Chia, SK, Dent, RA, Song, X, Robidoux, A, Parpia, S, Warr, D, Rayson, D, Pritchard, KI; Levine, MN | 2014 |
| Evaluation of Antimicrobial Photodynamic Therapy in Multiple Applications as a Coadjuvant in the Surgical Therapy of Access to Scaling                                                                                       | NCT03498404                                                                                                                                              | 2018 |
| Total Therapy XVII for Newly Diagnosed Patients With Acute Lymphoblastic Leukemia and Lymphoma                                                                                                                               | NCT03117751                                                                                                                                              | 2017 |
| Frailty and the biochemical effects of recombinant human growth hormone in women after surgery for hip fracture                                                                                                              | Yeo, , AL, Levy, D, Martin, FC, Sönksen, P, Sturgess, I, Wheeler, MM; Young, A                                                                           | 2003 |
| Vitamin D supplementation for the prevention of type 2 diabetes in overweight adults: study protocol for a randomized controlled trial                                                                                       | de Courten, , B, Mousa, A, Naderpoor, N, Teede, H, de Courten, MP; Scragg, R                                                                             | 2015 |
| Thermotherapy application increases the mRNA expression of angiogenic factors in human skeletal muscle                                                                                                                       | Roseguini, , BT, Kuhlenhoelter, AM, Neff, D, Nie, Y, Wong, B; Gavin, TP                                                                                  | 2016 |
| Oral paricalcitol for the treatment of secondary hyperparathyroidism in patients on hemodialysis or peritoneal dialysis                                                                                                      | Ross, , EA, Tian, J, Abboud, H, Hippensteel, R, Melnick, JZ, Pradhan, RS, Williams, LA, Hamm, LL; Sprague, SM                                            | 2008 |
| A phase I/II clinical trial to evaluate a combination of recombinant human platelet-derived growth factor-BB and recombinant human insulin-like growth factor-I in patients with periodontal disease                         | Howell, , TH, Fiorellini, JP, Paquette, DW, Offenbacher, S, Giannobile, WV; Lynch, SE                                                                    | 1997 |
| Effect of adjunctive systemic azithromycin with periodontal surgery in the treatment of chronic periodontitis in smokers: a pilot study                                                                                      | Dastoor, , SF, Travan, S, Neiva, RF, Rayburn, LA, Giannobile, WV; Wang, HL                                                                               | 2007 |
| Phase 1/2 study of immunotherapy with dendritic cells pulsed with autologous tumor lysate in patients with refractory bone and soft tissue sarcoma                                                                           | Miwa, , S, Nishida, H, Tanzawa, Y, Takeuchi, A, Hayashi, K, Yamamoto, N, Mizukoshi, E, Nakamoto, Y, Kaneko, S; Tsuchiya, H                               | 2017 |
| Effect of rhPDGF-BB on bone turnover during periodontal repair                                                                                                                                                               | Sarment, , DP, Cooke, JW, Miller, SE, Jin, Q, McGuire, MK, Kao, RT, McClain, PK, McAllister, BS, Lynch, SE; Giannobile, WV                               | 2006 |
| Efficacy and safety of very-low-calorie ketogenic diet: a double blind randomized crossover study                                                                                                                            | Colica, , C, Merra, G, Gasbarrini, A, De Lorenzo, A, Cioccoloni, G, Gualtieri, P, Perrone, MA, Bernardini, S, Bernardo, V, Di Renzo, L; Marchetti, M     | 2017 |
| Dose intensity and high dose therapy: two different concepts                                                                                                                                                                 | Livingston, RB                                                                                                                                           | 1994 |
| Impaired plasmacytoid dendritic cell maturation and differential chemotaxis in chronic hepatitis C virus: associations with antiviral treatment outcomes                                                                     | Mengshol, , JA, Golden-Mason, L, Castelblanco, N, Im, KA, Dillon, SM, Wilson, CC; Rosen, HR                                                              | 2009 |
| Phase II trial evaluating the palliative benefit of second-line zoledronic acid in breast cancer patients with either a skeletal-related event or progressive bone metastases despite first-line bisphosphonate therapy      | Clemons, , MJ, Dranitsaris, G, Ooi, WS, Yogendran, G, Sukovic, T, Wong, BYL, Verma, S, Pritchard, KI, Trudeau, M; Cole, DEC                              | 2006 |
| Melatonin Osteoporosis Prevention Study                                                                                                                                                                                      | NCT01152580                                                                                                                                              | 2010 |
| Growth hormone replacement therapy improves body composition and increases bone metabolism in elderly patients with pituitary disease                                                                                        | Fernholm, , R, Bramnert, M, Hägg, E, Hilding, A, Baylink, DJ, Mohan, S; Thorén, M                                                                        | 2000 |
| The engineered human anti-tumor necrosis factor-alpha antibody CDP571 inhibits inflammatory pathways but not T cell activation in patients with rheumatoid arthritis                                                         | Choy, , EH, Rankin, EC, Kassimos, D, Vetterlein, O, Garyfallos, A, Ravirajan, CT, Sopwith, M, Eastell, R, Kingsley, GH, Isenberg, DA; Panayi, GS         | 1999 |
| Clinical evaluation of autologous platelet rich fibrin in horizontal alveolar bony defects                                                                                                                                   | Rosamma Joseph, , V, Sam, G; Vijay Amol, N                                                                                                               | 2014 |
| Is breast magnetic resonance imaging (MRI) useful for diagnosis of additional sites of disease in patients recently diagnosed with ductal carcinoma in situ (DCIS)?                                                          | Ortiz-Perez, , T, Benveniste, AP, Ebuoma, LO, Sepulveda, KA, Severs, FJ, Kapoor, M; Sedgwick, EL                                                         | 2017 |
| Immunomodulatory Properties of Ketamine in Sepsis                                                                                                                                                                            | NCT01089361                                                                                                                                              | 2010 |

|                                                                                                                                                                                                                      |                                                                                                                                                                                                                  |      |
|----------------------------------------------------------------------------------------------------------------------------------------------------------------------------------------------------------------------|------------------------------------------------------------------------------------------------------------------------------------------------------------------------------------------------------------------|------|
| Fibroblast growth factor 23 and parathyroid hormone after treatment with active vitamin D and sevelamer carbonate in patients with chronic kidney disease stage 3b, a randomized crossover trial                     | Bleskestad, , IH, Bergrem, H, Hartmann, A, Godang, K; Gøransson, LG                                                                                                                                              | 2012 |
| Phase II open label, multi-center clinical trial of modulation of intermediate endpoint biomarkers by 1alpha-hydroxyvitamin D2 in patients with clinically localized prostate cancer and high grade pin              | Gee, , J, Bailey, H, Kim, K, Kolesar, J, Havighurst, T, Tutsch, KD, See, W, Cohen, MB, Street, N, Levan, L, Jarrard, D; Wilding, G                                                                               | 2013 |
| Paricalcitol for secondary hyperparathyroidism in renal transplantation                                                                                                                                              | Trillini, , M, Cortinovis, M, Ruggenenti, P, Reyes Loaeza, J, Courville, K, Ferrer-Siles, C, Prandini, S, Gaspari, F, Cannata, A, Villa, A, Perna, A, Gotti, E, Caruso, MR, Martinetti, D, Remuzzi, G; Perico, N | 2015 |
| Predictors of prolonged benefit from palbociclib plus fulvestrant in women with endocrine-resistant hormone receptor-positive/human epidermal growth factor receptor 2-negative metastatic breast cancer in PALOMA-3 | Cristofanilli, , M, DeMichele, A, Giorgetti, C, Turner, NC, Slamon, DJ, Im, S-A, Masuda, N, Verma, S, Loi, S, Colleoni, M, Theall, KP, Huang, X, Liu, Y; Bartlett, CH                                            | 2018 |
| Pilot of a Prebiotic and Probiotic Trial in Young Infants With Severe Acute Malnutrition                                                                                                                             | NCT03666572                                                                                                                                                                                                      | 2018 |
| Subantimicrobial-dose doxycycline modulates gingival crevicular fluid biomarkers of periodontitis in postmenopausal osteopenic women                                                                                 | Golub, , LM, Lee, HM, Stoner, JA, Sorsa, T, Reinhardt, RA, Wolff, MS, Ryan, ME, Nummikoski, PV; Payne, JB                                                                                                        | 2008 |
| Overall survival (OS) and updated disease-free survival (DFS) results of the NSABP C-08 trial assessing bevacizumab (B) in stage II and III colon cancer                                                             | Allegra, , CJ, Yothers, GA, O'Connell, MJ, Sharif, S, Petrelli, NJ, Colangelo, LH; Wolmark, N                                                                                                                    | 2011 |
| Synthetic human parathyroid hormone 1-34 vs calcitriol and calcium in the treatment of hypoparathyroidism                                                                                                            | Winer, , KK, Yanovski, JA; Cutler, GB                                                                                                                                                                            | 1996 |
| Phase I trial of the matrix metalloproteinase inhibitor marimastat combined with carboplatin and paclitaxel in patients with advanced non-small cell lung cancer                                                     | Goffin, , JR, Anderson, IC, Supko, JG, Eder Jr, JP, Shapiro, GI, Lynch, TJ, Shipp, M, Johnson, BE; Skarin, AT                                                                                                    | 2005 |
| Effects of Percutaneous Kyphoplasty on Bone Metabolism and Oxidative Stress in Elderly Patients with Osteoporotic Spinal Fractures                                                                                   | Liu, , Q, Cao, J; Kong, J                                                                                                                                                                                        | 2019 |
| A Randomized, Controlled Trial of Autologous Platelet Gel Treatment in Diabetic Foot Ulcers                                                                                                                          | NCT00338702                                                                                                                                                                                                      | 2006 |
| Danish Cardiovascular Screening Trial II                                                                                                                                                                             | NCT03946410                                                                                                                                                                                                      | 2019 |
| Assessment of OPG/RANK/RANKL gene expression levels in peripheral blood mononuclear cells (PBMC) after treatment with strontium ranelate and ibandronate in patients with postmenopausal osteoporosis                | Stuss, , M, Rieske, P, Ceglowska, A, Stępień-Kłos, W, Liberski, PP, Brzeziańska, E; Sewerynek, E                                                                                                                 | 2013 |
| Increased expression of genes after periodontal treatment with photodynamic therapy                                                                                                                                  | Franco, , EJ, Pogue, RE, Sakamoto, LHT, Cavalcante, LLM, Carvalho, DRD; de Andrade, RV                                                                                                                           | 2014 |
| Role of sevoflurane in organ protection during cardiac surgery in children: a randomized controlled trial                                                                                                            | Bettex, , DA, Wanner, PM, Bosshart, M, Balmer, C, Knirsch, W, Dave, H, Dillier, C, Bürki, C, Hug, M, Seifert, B, Spahn, DR; Beck-Schimmer, B                                                                     | 2015 |
| Biochemical markers comparison of dynamic hip screw and Gamma nail implants in the treatment of stable intertrochanteric fracture: a prospective study of 60 patients                                                | Song, , W, Chen, Y, Shen, H, Yuan, T, Zhang, C; Zeng, B                                                                                                                                                          | 2011 |
| Use of doxycycline to decrease the growth rate of abdominal aortic aneurysms: a randomized, double-blind, placebo-controlled pilot study                                                                             | Mosorin, , M, Juvonen, J, Biancari, F, Satta, J, Surcel, HM, Leinonen, M, Saikku, P; Juvonen, T                                                                                                                  | 2001 |
| Lack of a clear disease modifying activity of celecoxib in treatment of end-stage knee osteoarthritis: a randomized observer blinded clinical trial                                                                  | Van Helvoort, , EM, Coeleveld, K, Huisman, AM, Polak, AA, Bijlsma, JW, Van Laar, JM, Lafeber, FP; Mastbergen, SC                                                                                                 | 2017 |
| Oral Probiotics to Reduce Vaginal Group B Streptococcal Colonization in Late Pregnancy                                                                                                                               | NCT03008421                                                                                                                                                                                                      | 2017 |
| Clodronate treatment influences MMP-2 associated outcome in node positive breast cancer                                                                                                                              | Leppä, , S, Saarto, T, Vehmanen, L, Blomqvist, C; Elomaa, I                                                                                                                                                      | 2005 |
| Clinical evaluation of insulin like growth factor-i and vascular endothelial growth factor with alloplastic bone graft material in the management of human two wall intra-osseous defects                            | Devi, , R; Dixit, J                                                                                                                                                                                              | 2016 |
| Tocotrienol supplementation suppressed bone resorption and oxidative stress in postmenopausal osteopenic women: a 12-week randomized double-blinded placebo-controlled trial                                         | Shen, , CL, Yang, S, Tomison, MD, Romero, AW, Felton, CK; Mo, H                                                                                                                                                  | 2018 |
| Evaluating an Exercise Program to Reduce Cardiovascular Risk Factors in Children Infected With HIV                                                                                                                   | NCT00908284                                                                                                                                                                                                      | 2009 |
| Assessment of and Treatment Applied to Food Addiction in a Rural Healthy Behaviors Clinic                                                                                                                            | NCT03431831                                                                                                                                                                                                      | 2018 |
| Effect of Orthodontic Treatment on the Stability of Pre-Orthodontic Recession Coverage                                                                                                                               | NCT03886051                                                                                                                                                                                                      | 2019 |
| Angiogenic biomarkers and healing of living cellular constructs                                                                                                                                                      | Morelli, , T, Neiva, R, Nevins, ML, McGuire, MK, Scheyer, ET, Oh, TJ, Braun, TM, Nör, JE, Bates, D; Giannobile, WV                                                                                               | 2011 |
| Early control of PTH and FGF23 in normophosphatemic CKD patients: a new target in CKD-MBD therapy?                                                                                                                   | Oliveira, , RB, Cancela, AL, Gracioli, FG, Dos Reis, LM, Draibe, SA, Cuppari, L, Carvalho, AB, Jorgetti, V, Canziani, ME; Moysés, RM                                                                             | 2010 |
| Safety, pharmacokinetics, and changes in bone metabolism associated with zoledronic acid treatment in Japanese patients with primary osteoporosis                                                                    | Shiraki, , M, Tanaka, S, Suzuki, H, Ueda, S; Nakamura, T                                                                                                                                                         | 2016 |
| Serum osteoprotegerin and its ligand in Paget's disease of bone: relationship to disease activity and effect of treatment with bisphosphonates                                                                       | Alvarez, , L, Peris, P, Guanabens, N, Vidal, S, Ros, I, Pons, F, Filella, X, Monegal, A, Munoz-Gomez, J; Ballesta, AM                                                                                            | 2003 |
| Bovine-derived bone protein extract in the treatment of mandibular Class II furcations                                                                                                                               | Camargo, , PM, Wolinsky, LE, Burgess, AV, Wagner, WR, Paluk, SF; Kenney, EB                                                                                                                                      | 2002 |

|                                                                                                                                                                                                                                                                                                 |                                                                                                                                                                                                       |      |
|-------------------------------------------------------------------------------------------------------------------------------------------------------------------------------------------------------------------------------------------------------------------------------------------------|-------------------------------------------------------------------------------------------------------------------------------------------------------------------------------------------------------|------|
| Alendronate reduces serum TNFalpha and IL-1beta, increases neutrophil counts, and improves bone mineral density and bone metabolism indices in patients with chronic idiopathic neutropenia (CIN)-associated osteopenia/osteoporosis                                                            | Papadaki, , HA, Tsatsanis, C, Christoforidou, A, Malliaraki, N, Psyllaki, M, Pontikoglou, C, Miliaki, M, Margioris, AN; Eliopoulos, GD                                                                | 2004 |
| The DART Study: results from the Dose-Escalation and Expansion Cohorts Evaluating the Combination of Dalantercept plus Axitinib in Advanced Renal Cell Carcinoma                                                                                                                                | Voss, , MH, Bhatt, RS, Plimack, ER, Rini, BI, Alter, RS, Beck, JT, Wilson, D, Zhang, X, Mutyaba, M, Glasser, C, Attie, KM, Sherman, ML, Pandya, SS; Atkins, MB                                        | 2017 |
| Effect of systemic matrix metalloproteinase inhibition on periodontal wound repair: a proof of concept trial                                                                                                                                                                                    | Gapski, , R, Barr, JL, Sarment, DP, Layher, MG, Socransky, SS; Giannobile, WV                                                                                                                         | 2004 |
| Raloxifene treatment is associated with increased serum estradiol and decreased bone remodeling in healthy middle-aged men with low sex hormone levels                                                                                                                                          | Uebelhart, , B, Herrmann, F, Pavo, I, Draper, MW; Rizzoli, R                                                                                                                                          | 2004 |
| Etiological periodontal treatment with and without low level laser therapy on il-1beta level in gingival crevicular fluid: an in vivo multicentric pilot study                                                                                                                                  | Mastrangelo, , F, Dedola, A, Cattoni, F, Ferrini, F, Bova, F, Tatullo, M, Gherlone, E; Muzio, LLO                                                                                                     | 2018 |
| Treatment evidences beyond 5 years                                                                                                                                                                                                                                                              | Olarte, OR                                                                                                                                                                                            | 2017 |
| Photodynamic therapy decrease immune-inflammatory mediators levels during periodontal maintenance                                                                                                                                                                                               | da Cruz Andrade, , PV, Euzebio Alves, VT, de Carvalho, VF, De Franco Rodrigues, M, Pannuti, CM, Holzhausen, M, De Micheli, G; Conde, MC                                                               | 2017 |
| Community-based Clinical Trial With Microbiota-directed Complementary Foods (MDCFs) Made of Locally Available Food Ingredients for the Management of Children With Primary Moderate Acute Malnutrition                                                                                          | NCT04015999                                                                                                                                                                                           | 2019 |
| Phase II, parallel-design study of preoperative combined modality therapy and the matrix metalloprotease (mmp) inhibitor prinomastat in patients with esophageal adenocarcinoma                                                                                                                 | Heath, , EI, Burtness, BA, Kleinberg, L, Salem, RR, Yang, SC, Heitmiller, RF, Canto, MI, Knisely, JP, Topazian, M, Montgomery, E, Tsottles, N, Pithavala, Y, Rohmiller, B, Collier, M; Forastiere, AA | 2006 |
| Community-based Clinical Trial With Microbiota Directed Complementary Foods (MDCFs) Made of Locally Available Food Ingredients for the Management of Children With Post-severe Acute Malnutrition Moderate Acute Malnutrition (Post-SAM MAM)                                                    | NCT04015986                                                                                                                                                                                           | 2019 |
| Coordinate production of PGE2 and IL-1 beta in the gingival crevicular fluid of adults with periodontitis: its relationship to alveolar bone loss and disruption by twice daily treatment with ketorolac tromethamine oral rinse                                                                | Cavanaugh, , PF, Meredith, MP, Buchanan, W, Doyle, MJ, Reddy, MS; Jeffcoat, MK                                                                                                                        | 1998 |
| Granulocyte-colony-stimulating factor induces increased serum levels of soluble interleukin 2 receptors preceding engraftment in autologous bone marrow transplantation                                                                                                                         | Dreger, , P, Grelle, K, Eckstein, V, Suttrop, M, Muller-Ruchholtz, W, Loffler, H; Schmitz, N                                                                                                          | 1993 |
| Evidenced-Based Review of Clinical Studies on Periodontics                                                                                                                                                                                                                                      |                                                                                                                                                                                                       | 2009 |
| Signatures of mesenchymal cell lineages and microenvironment factors are dysregulated in high risk myeloma                                                                                                                                                                                      | Yaccoby, , S, Qu, P, Mehdi, S, Hoering, A, Epstein, J, Johnson, SK, Van Rhee, F, Zangari, M, Schinke, C, Thanendrarajan, S, Barlogie, B, Davies, FE; Morgan, GJ                                       | 2016 |
| Effects of intravitreal pegaptanib or bevacizumab and laser in treatment of threshold retinopathy of prematurity in zone I and posterior zone II–four years results                                                                                                                             | Autrata, , R, Senková, K, Holousová, M, Krejčírová, I, Dolezel, Z; Borek, I                                                                                                                           | 2012 |
| Targeting inflammatory pathways: a phase 2 trial of the JAK-inhibitor ruxolitinib in combination with exemestane for aromatase inhibitor-resistant, estrogen receptor-positive breast cancer                                                                                                    | DeMichele, , AM, Clark, AS, Holmes, R, Volpe, M, Medrano, C, Troxel, A, Fox, K, Domchek, S, Matro, J, Bradbury, A, Shih, N, Feldman, M, Hexner, E; Bromberg, J                                        | 2017 |
| Melatonin improves bone mineral density at the femoral neck in postmenopausal women with osteopenia: a randomized controlled trial                                                                                                                                                              | Amstrup, , AK, Sikjaer, T, Heickendorff, L, Mosekilde, L; Rejnmark, L                                                                                                                                 | 2015 |
| Intravenous ibandronate acutely reduces bone hyperresorption in chronic critical illness                                                                                                                                                                                                        | Via, , MA, Potenza, MV, Hollander, J, Liu, X, Peng, Y, Li, J, Sun, L, Zaidi, M; Mechanick, JI                                                                                                         | 2012 |
| Adalimumab reduces hand bone loss in rheumatoid arthritis independent of clinical response: subanalysis of the PREMIER study                                                                                                                                                                    | Hoff, , M, Kvien, TK, Kälvesten, J, Elden, A, Kavanaugh, A; Haugeberg, G                                                                                                                              | 2011 |
| Effects of Supplementation of Vitamin D in Patients With Crohn's Disease                                                                                                                                                                                                                        | NCT02704624                                                                                                                                                                                           | 2016 |
| Early parathyroidectomy increases bone mineral density in patients with mild primary hyperparathyroidism: a prospective and randomized study                                                                                                                                                    | Almqvist, , EG, Becker, C, Bondeson, AG, Bondeson, L; Svensson, J                                                                                                                                     | 2004 |
| Effects of N-acetylcysteine on the cardiac remodeling biomarkers and major adverse events following acute myocardial infarction: a randomized clinical trial                                                                                                                                    | Talasaz, , AH, Khalili, H, Fahimi, F, Jenab, Y, Broumand, MA, Salarifar, M; Darabi, F                                                                                                                 | 2014 |
| A prospective, randomised, placebo-controlled, double-masked, three-armed, multicentre phase II/III trial for the Study of a Topical Treatment of Ischaemic Central Retinal Vein Occlusion to Prevent Neovascular Glaucoma - the STRONG study: study protocol for a randomised controlled trial | Lorenz, , K, Scheller, Y, Bell, K, Grus, F, Ponto, KA, Bock, F, Cursiefen, C, Flach, J, Gehring, M, Peto, T, Silva, R, Tal, Y; Pfeiffer, N                                                            | 2017 |
| First prospective data on impact of minimal residual disease on long-term clinical outcomes after venetoclax plus rituximab versus bendamustine plus rituximab: phase III murano study                                                                                                          | Kater, , AP, Hillmen, P, Eichhorst, B, Langerak, AW, Kipps, TJ, Owen, C, Boyer, M, Humphrey, K, Punnoose, EA, Wang, J, Chyla, B, Verdugo, ME, Wu, J, Jiang, Y, Mobasher, M; Seymour, JF               | 2018 |
| Reduced bone loss by alphacalcidol in glucocorticoid-induced osteoporosis                                                                                                                                                                                                                       | Lakatos, , P, Kiss, L, Horvath, C, Takacs, I, Foldes, J, Bossanyi, A, Buzas, E; Major, T                                                                                                              | 1996 |
| Evaluation of cyclosporine A with β-TCP in the treatment of human infra bony defects – A randomized controlled pilot study                                                                                                                                                                      | Amalakara, , J, Reddy, K, Avula, H, Mishra, A, Kalakonda, B; Pandey, R                                                                                                                                | 2017 |
| Randomized Trial Comparing Single vs. Maintenance Fecal Microbiota Transplant for Refractory Crohn's Disease in Children                                                                                                                                                                        | NCT03747718                                                                                                                                                                                           | 2018 |

|                                                                                                                                                                                                |                                                                                                                                                                                                                                                                         |      |
|------------------------------------------------------------------------------------------------------------------------------------------------------------------------------------------------|-------------------------------------------------------------------------------------------------------------------------------------------------------------------------------------------------------------------------------------------------------------------------|------|
| Long-term effects of magnesium carbonate on coronary artery calcification and bone mineral density in hemodialysis patients: a pilot study                                                     | Spiegel, , DM; Farmer, B                                                                                                                                                                                                                                                | 2009 |
| A prospective, randomized, controlled trial comparing radiographic and clinical outcomes between stand-alone lateral interbody lumbar fusion with either silicate calcium phosphate or rh-BMP2 | Pimenta, , L, Marchi, L, Oliveira, L, Coutinho, E; Amaral, R                                                                                                                                                                                                            | 2013 |
| Mud-bath treatment in spondylitis associated with inflammatory bowel disease—a pilot randomised clinical trial                                                                                 | Cozzi, , F, Podswiadek, M, Cardinale, G, Oliviero, F, Dani, L, Sfriso, P; Punzi, L                                                                                                                                                                                      | 2007 |
| The effect of neonatal sepsis on bone turnover in very-low birth weight premature infants                                                                                                      | Eliakim, , A, Shiff, Y, Nemet, D; Dolfin, T                                                                                                                                                                                                                             | 2003 |
| Effect of High-Flux Dialysis on Circulating FGF-23 Levels in End-Stage Renal Disease Patients: results from a Randomized Trial                                                                 | Schneider, , A, Schneider, MP, Krieter, DH, Genser, B, Scharnagl, H, Stojakovic, T, Wanner, C; Drechsler, C                                                                                                                                                             | 2015 |
| Elevation of serum tumor necrosis factor alpha in patients with periprosthetic osteolysis: a case-control study                                                                                | Chaganti, , RK, Purdue, E, Sculco, TP; Mandl, LA                                                                                                                                                                                                                        | 2014 |
| Breakfast replacement with a low-glycaemic response liquid formula in patients with type 2 diabetes: a randomised clinical trial                                                               | Stenvers, , DJ, Schouten, LJ, Jurgens, J, Endert, E, Kalsbeek, A, Fliers, E; Bisschop, PH                                                                                                                                                                               | 2014 |
| Effects of GM-CSF on the stem cells mobilization and plasma C-reactive protein levels in patients with acute myocardial infarction                                                             | Deng, , Z, Yang, C, Deng, H, Yang, A, Geng, T, Chen, X, Ma, A; Liu, Z                                                                                                                                                                                                   | 2006 |
| Vitamin D and Carboxy PTH Fragments in Coronary Calcification                                                                                                                                  | NCT00502268                                                                                                                                                                                                                                                             | 2007 |
| Matrix metalloproteinase-3 serum levels are correlated with disease activity and predict clinical response in rheumatoid arthritis                                                             | Ribbens, , C, Andre, B, Jaspar, J-M, Kaye, O, Kaiser, M-J, De Groote, D; Malaise, MG                                                                                                                                                                                    | 2000 |
| Efficacy of modified LiuJunZi decoction on functional dyspepsia of spleen-deficiency and qi-stagnation syndrome: a randomized controlled trial                                                 | Zhang, , S, Zhao, L, Wang, H, Wang, C, Huang, S, Shen, H, Wei, W, Tao, L; Zhou, T                                                                                                                                                                                       | 2013 |
| Matrix metalloproteinase-3 serum levels are correlated with disease activity and predict clinical response in rheumatoid arthritis                                                             |                                                                                                                                                                                                                                                                         | 2000 |
| Phase I study of PF-03446962, a fully human monoclonal antibody against activin receptor-like kinase-1, in patients with hepatocellular carcinoma                                              | Simonelli, , M, Zucali, P, Santoro, A, Thomas, MB, de Braud, FG, Borghaei, H, Berlin, J, Denlinger, CS, Noberasco, C, Rimassa, L, Kim, T-Y, English, PA, Abbattista, A, Gallo Stampino, C, Carpentieri, M; Williams, JA                                                 | 2016 |
| Effect of unfractionated and low-molecular-weight heparin on OPG, sRANKL, and von Willebrand factor concentrations during hemodialysis                                                         | Klejna, , K, Naumnik, B, Koc-Żórawska, E; Myśliwiec, M                                                                                                                                                                                                                  | 2014 |
| The Effectiveness of Different Methods for Healing a Palatal Donor Site                                                                                                                        | NCT03567148                                                                                                                                                                                                                                                             | 2018 |
| Calcitriol and doxercalciferol are equivalent in controlling bone turnover, suppressing parathyroid hormone, and increasing fibroblast growth factor-23 in secondary hyperparathyroidism       | Wesseling-Perry, , K, Pereira, RC, Sahney, S, Gales, B, Wang, HJ, Elashoff, R, Jüppner, H; Salusky, IB                                                                                                                                                                  | 2011 |
| Cilostazol prevents foot ulcers in diabetic patients with peripheral vascular disease                                                                                                          | de Franciscis, , S, Gallelli, L, Battaglia, L, Molinari, V, Montemurro, R, Stillitano, DM, Buffone, G; Serra, R                                                                                                                                                         | 2015 |
| The Efficacy of TGF for Treating Osteoarthritis of the Knee                                                                                                                                    | NCT03562429                                                                                                                                                                                                                                                             | 2018 |
| Dose selection trial of metronomic oral vinorelbine monotherapy in patients with metastatic cancer: a hellenic cooperative oncology group clinical translational study                         | Briasoulis, , E, Aravantinos, G, Kouvatsas, G, Pappas, P, Bizioti, E, Sainis, I, Makatsoris, T, Varthalitis, I, Xanthakis, I, Vassias, A, Klouvas, G, Boukovinas, I, Fountzilias, G, Syrigos, KN, Kalofonos, H; Samantas, E                                             | 2013 |
| Correction of vitamin D status by calcidiol: pharmacokinetic profile, safety, and biochemical effects on bone and mineral metabolism of daily and weekly dosage regimens                       | Minisola, , S, Cianferotti, L, Biondi, P, Cipriani, C, Fossi, C, Franceschelli, F, Giusti, F, Leoncini, G, Pepe, J, Bischoff-Ferrari, HA; Brandi, ML                                                                                                                    | 2017 |
| Increased Bile Acids and FGF19 After Sleeve Gastrectomy and Roux-en-Y Gastric Bypass Correlate with Improvement in Type 2 Diabetes in a Randomized Trial                                       | Nemati, , R, Lu, J, Dokpuang, D, Booth, M, Plank, LD; Murphy, R                                                                                                                                                                                                         | 2018 |
| Diagnostic Biomarkers Related to Periodontal Disease Activity in Diabetic                                                                                                                      | NCT02220751                                                                                                                                                                                                                                                             | 2014 |
| Randomized clinical trial comparing efficacy and safety of brand versus generic alendronate (Bonmax) for osteoporosis treatment                                                                | Unnanuntana, , A, Jarusriwanna, A; Songcharoen, P                                                                                                                                                                                                                       | 2017 |
| Pharmacokinetics and tolerability of multiple-dose rosuvastatin: an open-label, randomized-sequence, three-way crossover trial in healthy Chinese volunteers                                   | Zhang, , R, Li, Y, Jiang, X; Wang, L                                                                                                                                                                                                                                    | 2009 |
| Subconjunctival Bevacizumab to Prevent Bleb Failure After Glaucoma Filtration Surgery                                                                                                          | NCT00468429                                                                                                                                                                                                                                                             | 2007 |
| Clinical treatment of alcoholic liver disease                                                                                                                                                  | Kim, DJ                                                                                                                                                                                                                                                                 | 2012 |
| The SongDance Study: stress, Ongoing Self- Monitoring and Diabetes, Nerve Stimulation and Cognitive Empowerment                                                                                | NCT03576430                                                                                                                                                                                                                                                             | 2018 |
| Effect of atorvastatin on chronic periodontitis: a randomized pilot study                                                                                                                      | Fajardo, , ME, Rocha, ML, Sánchez-Marin, FJ; Espinosa-Chávez, EJ                                                                                                                                                                                                        | 2010 |
| Small for gestational age (SGA): endocrine and metabolic consequences and effects of growth hormone treatment                                                                                  | Hokken-Koelega, , AC, De Waal, WJ, Sas, TC, Van Pareren, Y; Arends, NJ                                                                                                                                                                                                  | 2004 |
| The effect of calcium and phosphorus supplementation on metabolic bone disorders in premature infants                                                                                          | Torabi, , Z, Moemeni, N, Ahmadiashar, A; Mazloomzadeh, S                                                                                                                                                                                                                | 2014 |
| The ACT-OUT Trial: aCTivity OUTcomes Based on High Carbohydrate or High Fat Diet in Metabolic Syndrome                                                                                         | NCT01357382                                                                                                                                                                                                                                                             | 2011 |
| Effects of Sevelamer Carbonate in Patients With CKD and Proteinuria: the ANSWER Randomized Trial                                                                                               | Ruggiero, , B, Trillini, M, Tartaglione, L, Rotondi, S, Perticucci, E, Tripepi, R, Aparicio, C, Lecchi, V, Perna, A, Peraro, F, Villa, D, Ferrari, S, Cannata, A, Mazzaferro, S, Mallamaci, F, Zoccali, C, Bellasi, A, Cozzolino, M, Remuzzi, G, Ruggenti, P; Kohan, DE | 2019 |

|                                                                                                                                                                                                                    |                                                                                                                                                                                                                                     |      |
|--------------------------------------------------------------------------------------------------------------------------------------------------------------------------------------------------------------------|-------------------------------------------------------------------------------------------------------------------------------------------------------------------------------------------------------------------------------------|------|
| TBCRC-010: phase I/II study of dasatinib in combination with zoledronic acid for the treatment of breast cancer bone metastasis                                                                                    | Mitri, , Z, Nanda, R, Blackwell, K, Costelloe, CM, Hood, I, Wei, C, Brewster, AM, Ibrahim, NK, Koenig, KB, Hortobagyi, GN, Van Poznak, C, Rimawi, MF; Moulder-Thompson, S                                                           | 2016 |
| Clinical study on effect of Astragalus Injection and its immuno-regulation action in treating chronic aplastic anemia                                                                                              | Wang, , MS, Li, J, Di, HX, Li, ZL, Yang, SL, Hou, W, Yan, JY; Zhao, XM                                                                                                                                                              | 2007 |
| Growth Factors Release of PRF and PRGF                                                                                                                                                                             | NCT02447510                                                                                                                                                                                                                         | 2015 |
| On the neuroendocrinopathy of critical illness: perspectives for feeding and novel treatments                                                                                                                      | Van Den Berghe, G                                                                                                                                                                                                                   | 2016 |
| New targets in AML                                                                                                                                                                                                 | Yilmaz, M                                                                                                                                                                                                                           | 2014 |
| The role of 25-hydroxyvitamin D deficiency in promoting insulin resistance and inflammation in patients with chronic kidney disease: a randomised controlled trial                                                 | Petchey, , WG, Hickman, IJ, Duncan, E, Prins, JB, Hawley, CM, Johnson, DW, Barraclough, K; Isbel, NM                                                                                                                                | 2009 |
| The efficacy and safety of tocilizumab combined with disease-modifying anti-rheumatoid drugs in the treatment of active rheumatoid arthritis: a multi-center, randomized, double-blinded, placebo-controlled trial | Shi, , Q, Zhao, Y, Bao, CD, Li, XF, Huang, F, Zhu, P, Li, ZG, Gu, JR, Zhang, ZY, Zhao, DB, Zhao, SL, Jiang, QD, Tian, J; Zhang, FC                                                                                                  | 2013 |
| Clinical effects of hormone replacement therapy with estradiol valerate and cyproterone acetate in perimenopausal women                                                                                            | Tinelli, , FG, Tinelli, A; Sena, T                                                                                                                                                                                                  | 2002 |
| Loop diuretics increase bone turnover and decrease BMD in osteopenic postmenopausal women: results from a randomized controlled study with bumetanide                                                              | Rejnmark, , L, Vestergaard, P, Heickendorff, L, Andreasen, F; Mosekilde, L                                                                                                                                                          | 2006 |
| Maternal serum interleukin-6, C-reactive protein, and matrix metalloproteinase-9 concentrations as risk factors for preterm birth <32 weeks and adverse neonatal outcomes                                          | Sorokin, , Y, Romero, R, Mele, L, Wapner, RJ, Iams, JD, Dudley, DJ, Spong, CY, Peaceman, AM, Leveno, KJ, Harper, M, Caritis, SN, Miodovnik, M, Mercer, BM, Thorp, JM, O'Sullivan, MJ, Ramin, SM, Carpenter, MW, Rouse, DJ; Sibai, B | 2010 |
| Effect of metformin treatment on circulating osteoprotegerin in patients with nonalcoholic fatty liver disease                                                                                                     | Sofer, , E; Shargorodsky, M                                                                                                                                                                                                         | 2016 |
| Insulin Therapy Reduce Post-Operative Inflammatory Response After Curative Colorectal Cancer Resection: randomization Controlled Trial                                                                             | NCT02746432                                                                                                                                                                                                                         | 2016 |
| Stem cells cultured on beta tricalcium phosphate (beta-TCP) in combination with recombinant human platelet-derived growth Factor-BB (rh-PDGF-BB) for the treatment of human infrabony defects                      | Dhote, , R, Charde, P, Bhongade, M; Rao, J                                                                                                                                                                                          | 2015 |
| Spinal Cord Stimulation in Patients With Complex Regional Pain Syndrome: a Possible Target for Immunomodulation?                                                                                                   | Krick, , N, Schreurs, MWJ, Groeneweg, JG, Dik, WA, Tjiang, GCH, Gültuna, I, Stronks, DL; Huygen, FJPM                                                                                                                               | 2018 |
| Systemic MMP inhibition for periodontal wound repair: results of a multi-centre randomized-controlled clinical trial                                                                                               | Gapski, , R, Hasturk, H, Van Dyke, TE, Oringer, RJ, Wang, S, Braun, TM; Giannobile, WV                                                                                                                                              | 2009 |
| Effect of dietary calcium vs calcium citrate on conventional biochemical markers in perimenopausal women                                                                                                           | Aguilera-Barreiro Mde, , L, Guerrero-Mercado Adel, S, Méndez-Jiménez, TE; Milián-Suazo, F                                                                                                                                           | 2005 |
| Effect of nonsurgical periodontal therapy on interleukin-34 levels in periodontal health and disease                                                                                                               | Guruprasad, , CN; Pradeep, AR                                                                                                                                                                                                       | 2018 |
| Ketogenic Diet: a Novel Metabolic Strategy to Treat Lymphedema Patients?                                                                                                                                           | NCT03991897                                                                                                                                                                                                                         | 2019 |
| Risk factors for the development of vertebral fractures after percutaneous vertebroplasty                                                                                                                          | Martinez-Ferrer, , A, Blasco, J, Carrasco, JL, Macho, JM, Román, LS, López, A, Monegal, A, Gualabens, N; Peris, P                                                                                                                   | 2013 |
| Investigating the Effect of a Single Infusion of Reconstituted High-Density Lipoprotein in Patients with Symptomatic Carotid Plaques                                                                               | Nasr, , H, Torsney, E, Poston, RN, Hayes, L, Gaze, DC, Bassar, R, Thompson, MM, Loftus, IM; Cockerill, GW                                                                                                                           | 2015 |
| Bone Health in Gynecologic Cancers-does FOSAVANCE Help?                                                                                                                                                            | NCT00593580                                                                                                                                                                                                                         | 2008 |
| Antimicrobial photodynamic therapy in the non-surgical treatment of aggressive periodontitis: cytokine profile in gingival crevicular fluid, preliminary results                                                   | de Oliveira, , RR, Schwartz-Filho, HO, Novaes, AB, Garlet, GP, de Souza, RF, Taba, M, Scombatti de Souza, SL; Ribeiro, FJ                                                                                                           | 2009 |
| Melatonin as an Adjunctive Therapy for Chronic Periodontitis                                                                                                                                                       | NCT03368430                                                                                                                                                                                                                         | 2017 |
| Randomized phase 2 trial of anti-tumor necrosis factor therapy for cachexia in patients with early rheumatoid arthritis                                                                                            | Marcora, , SM, Chester, KR, Mittal, G, Lemmey, AB; Maddison, PJ                                                                                                                                                                     | 2006 |
| Long-term safety of intravenous ibandronic acid for up to 4 years in metastatic breast cancer: an open-label trial                                                                                                 | Pecherstorfer, , M, Rivkin, S, Body, JJ, Diel, I; Bergström, B                                                                                                                                                                      | 2006 |
| Sequential intravenous high dose oral antibiotics in the treatment of osteoarticular infections in children: a randomized controlled trial                                                                         | Tsui, , K, Crawford, H, Mow, FC, Webb, R, Voss, LM, Stott, NS, Stewart, J; Lennon, DR                                                                                                                                               | 2016 |
| Decortication With Calcium Phosphosilicate Putty in the Treatment of Non-contained Intrabony Periodontal Defects                                                                                                   | NCT03435757                                                                                                                                                                                                                         | 2018 |
| Effects of telmisartan on inflammatory cytokines and coronary plaque component as assessed on integrated backscatter intravascular ultrasound in hypertensive patients                                             | Yamaguchi, , K, Wakatsuki, T, Soeki, T, Niki, T, Taketani, Y, Oeduka, H, Kusunose, K, Ise, T, Iwase, T, Yamada, H; Sata, M                                                                                                          | 2014 |
| Evaluation of Platelet Rich Fibrin Matrix as Regenerative Material in Intraosseous Defects                                                                                                                         | NCT03616925                                                                                                                                                                                                                         | 2018 |
| Effect of percutaneous vertebroplasty and percutaneous kyphoplasty on adjacent intervertebral disc degeneration and mechanism                                                                                      | Tian, , L, Meng, C-Y; Xu, X-M                                                                                                                                                                                                       | 2014 |
| Etiological periodontal treatment with and without low-level laser therapy on IL-1 $\beta$ level in gingival crevicular fluid: an in vivo multicentric pilot study                                                 | Mastrangelo, , F, Dedola, A, Cattoni, F, Ferrini, F, Bova, F, Tatullo, M, Gherlone, E; Lo Muzio, L                                                                                                                                  | 2018 |
| PTH (1-84) replacement therapy in hypoparathyroidism: effects on bone metabolism and structure                                                                                                                     | Sikjaer, , T, Rejnmark, L, Bruel, A, Thomsen, J; Mosekilde, L                                                                                                                                                                       | 2011 |
| Peri-Implantitis Surgical Treatment an RCT Study                                                                                                                                                                   | NCT02575274                                                                                                                                                                                                                         | 2015 |
| Immunomodulatory effect of the topical ophthalmic Janus kinase inhibitor tofacitinib (CP-690,550) in patients with dry eye disease                                                                                 | Huang, , JF, Yafawi, R, Zhang, M, McDowell, M, Rittenhouse, KD, Sace, F, Liew, SH, Cooper, SR; Pickering, EH                                                                                                                        | 2012 |

|                                                                                                                                                                                            |                                                                                                                                                                                                                                                       |      |
|--------------------------------------------------------------------------------------------------------------------------------------------------------------------------------------------|-------------------------------------------------------------------------------------------------------------------------------------------------------------------------------------------------------------------------------------------------------|------|
| Efficacy of risedronate with cholecalciferol on 25-hydroxyvitamin D level and bone turnover in Korean patients with osteoporosis                                                           | Chung, , HY, Chin, SO, Kang, MI, Koh, JM, Moon, SH, Yoon, BK, Yoon, HK, Chung, YS; Park, HM                                                                                                                                                           | 2011 |
| Peripheral blood circulating multiple myeloma cells (CMMCs) correlate with disease burden and can be used to characterize high-risk cytogenetics in newly diagnosed and smoldering myeloma | Foulk, , B, Schaffer, M, Gross, S, Rao, C, Smirnov, D, Chaturvedi, S, Reddy, M, Repollet, M, Rojas, C, Auclair, D, DeRome, M, Weiss, B; Sasser, AK                                                                                                    | 2016 |
| Thrombospondin-1 is a plasmatic marker of peripheral arterial disease that modulates endothelial progenitor cell angiogenic properties                                                     | Smadja, , DM, d'Audigier, C, Bièche, I, Evrard, S, Mauge, L, Dias, JV, Labreuche, J, Laurendeau, I, Marsac, B, Dizier, B, Wagner-Ballon, O, Boisson-Vidal, C, Morandi, V, Duong-Van-Huyen, JP, Bruneval, P, Dignat-George, F, Emmerich, J; Gaussem, P | 2011 |
| Gingival crevicular fluid matrix metalloproteinase-8 levels following adjunctive use of meloxicam and initial phase of periodontal therapy                                                 | Buduneli, , N, Vardar, S, Atilla, G, Sorsa, T, Luoto, H; Baylas, H                                                                                                                                                                                    | 2002 |
| Improving Community Ambulation After Hip Fracture                                                                                                                                          | NCT01783704                                                                                                                                                                                                                                           | 2013 |
| MELABLOCK: a Clinical Trial on the Efficacy and Safety of Propranolol 80 mg in Melanoma Patients                                                                                           | NCT02962947                                                                                                                                                                                                                                           | 2016 |
| Local bone treatment in osteoporosis                                                                                                                                                       | Kurth, A                                                                                                                                                                                                                                              | 2018 |
| Subantimicrobial dose doxycycline efficacy as a matrix metalloproteinase inhibitor in chronic periodontitis patients is enhanced when combined with a non-steroidal anti-inflammatory drug | Lee, , HM, Ciancio, SG, Tüter, G, Ryan, ME, Komaroff, E; Golub, LM                                                                                                                                                                                    | 2004 |
| High-intensity Training in an Enriched Environment in Late Phase After Stroke                                                                                                              | NCT02889939                                                                                                                                                                                                                                           | 2016 |
| Efficacy of low doses of pamidronate in osteopenic patients administered in the early post-renal transplant                                                                                | Torregrosa, , JV, Fuster, D, Monegal, A, Gentil, MA, Bravo, J, Guirado, L, Muxí, A; Cubero, J                                                                                                                                                         | 2011 |
| A Trial of Tadalafil in Interstitial Lung Disease of Scleroderma                                                                                                                           | NCT01553981                                                                                                                                                                                                                                           | 2012 |
| Dietary Supplements and Periodontal Wound Healing                                                                                                                                          | NCT02315222                                                                                                                                                                                                                                           | 2014 |
| The effects of denosumab and alendronate on glucocorticoid-induced osteoporosis in patients with glomerular disease: a randomized, controlled trial                                        | Iseri, , K, Iyoda, M, Watanabe, M, Matsumoto, K, Sanada, D, Inoue, T, Tachibana, S; Shibata, T                                                                                                                                                        | 2018 |
| Infusions of interleukin-1 alpha after autologous transplantation for Hodgkin's disease and non-Hodgkin's lymphoma induce effector cells with antilymphoma cytolytic activity              | Katsanis, , E, Weisdorf, DJ, Xu, Z, Dancisak, BB, Halet, ML; Blazar, BR                                                                                                                                                                               | 1994 |
| Safety and effectiveness profile of raloxifene in long-term, prospective, postmarketing surveillance                                                                                       | Iikuni, , N, Hamaya, E, Nihojima, S, Yokoyama, S, Goto, W, Taketsuna, M, Miyauchi, A; Sowa, H                                                                                                                                                         | 2012 |
| MIV-711, a highly selective cathepsin K inhibitor, reduces biomarkers of bone resorption and cartilage degradation in healthy subjects                                                     | Lindstrom, , E, Grabowska, U, Jerling, M; Edenius, C                                                                                                                                                                                                  | 2014 |
| Effect of danhong injection on the mobilisation of endothelial progenitor cells to vascular repair after percutaneous coronary intervention: a randomised controlled trial                 | Hu, , Z, Wang, H, Fan, G, Zhang, H, Wang, X, Mao, J, Zhao, Y, An, Y, Huang, Y, Li, C, Chang, L, Chu, X, Li, L, Li, Y, Zhang, Y, Qin, G, Gao, X; Zhang, B                                                                                              | 2016 |
| CTX biochemical marker of bone metabolism. Is it a reliable predictor of bisphosphonate-associated osteonecrosis of the jaws after surgery? Part II: a prospective clinical study          | Lee, , CY; Suzuki, JB                                                                                                                                                                                                                                 | 2010 |
| Clinical response of azithromycin as an adjunct to non-surgical periodontal therapy in smokers                                                                                             | Mascarenhas, , P, Gapski, R, Al-Shammari, K, Hill, R, Soehren, S, Fenno, JC, Giannobile, WV; Wang, HL                                                                                                                                                 | 2005 |
| Interferon- $\alpha/\beta$ receptor as a prognostic marker in osteosarcoma                                                                                                                 | Kubo, , T, Shimose, S, Matsuo, T, Fujimori, J, Arihiro, K; Ochi, M                                                                                                                                                                                    | 2011 |
| Treatment of newly diagnosed multiple myeloma: goals and options                                                                                                                           | Tacchetti, , P, Zamagni, E, Pantani, L; Cavo, M                                                                                                                                                                                                       | 2017 |
| Surgical techniques, open versus minimally invasive gastrectomy after chemotherapy (STOMACH trial): study protocol for a randomized controlled trial                                       | Straatman, , J, van der Wielen, N, Cuesta, MA, Gisbertz, SS, Hartemink, KJ, Alonso Poza, A, Weitz, J, Mateo Vallejo, F, Ahktar, K, Diez Del Val, I, Roig Garcia, J; van der Peet, DL                                                                  | 2015 |
| Osteoclast inhibitory effects of vitamin K2 alone or in combination with etidronate or risedronate in patients with rheumatoid arthritis: 2-year results                                   | Morishita, , M, Nagashima, M, Wauke, K, Takahashi, H; Takenouchi, K                                                                                                                                                                                   | 2008 |
| Growth hormone favorably affects bone turnover and bone mineral density in patients with short bowel syndrome undergoing intestinal rehabilitation                                         | Tangpricha, , V, Luo, M, Fernández-Estívariz, C, Gu, LH, Bazargan, N, Klapproth, JM, Sitaraman, SV, Galloway, JR, Leader, LM; Ziegler, TR                                                                                                             | 2006 |
| Effect of a short-term treatment with alendronate on bone density and bone markers in patients with central diabetes insipidus                                                             | Pivonello, , R, Faggiano, A, Di Somma, C, Klain, M, Filippella, M, Salvatore, M, Lombardi, G; Colao, A                                                                                                                                                | 1999 |
| Interleukin-18 has antipermeability and antiangiogenic activities in the eye: reciprocal suppression with VEGF                                                                             | Shen, , J, Choy, DF, Yoshida, T, Iwase, T, Hafiz, G, Xie, B, Hackett, SF, Arron, JR; Campochiaro, PA                                                                                                                                                  | 2014 |
| Endothelial progenitor cells in subclinical hypothyroidism: the effect of thyroid hormone replacement therapy                                                                              | Shakoor, , SK, Aldibbiat, A, Ingole, LE, Campbell, SC, Sibal, L, Shaw, J, Home, PD, Razvi, S; Weaver, JU                                                                                                                                              | 2010 |
| A clinical, radiological and IL-6 evaluation of subgingivally delivered simvastatin in the treatment of chronic periodontitis                                                              | Rath, , A, Mahendra, J, Thomas, L, Sandhu, M, Namasi, A; Ramakrishna, T                                                                                                                                                                               | 2012 |
| Effects of antioxidant supplements intervention on the level of plasma inflammatory molecules and disease severity of rheumatoid arthritis patients                                        | Bae, , SC, Jung, WJ, Lee, EJ, Yu, R; Sung, MK                                                                                                                                                                                                         | 2009 |
| Two-level Coflex interlaminar stabilization compared to two-level lumbar spinal fusion for the treatment of spinal stenosis with low-grade spondylolisthesis                               | Auerbach, , JD; Field, JS                                                                                                                                                                                                                             | 2013 |
| Early application of nerve growth factor affects serum inflammatory cytokine levels in neonatal hypoxic ischemic encephalopathy                                                            | Huang, , H, Zheng, K, Xia, R, Chen, J, Yang, X, Ye, C; Lin, Q                                                                                                                                                                                         | 2007 |
| Effect of Intensive Periodontal Therapy on Vascular Function                                                                                                                               | NCT00327561                                                                                                                                                                                                                                           | 2006 |
| Open-label randomized parallel controlled study comparing bone mineral density between alendronate plus alfacalcidol combination and                                                       | Saito, , M; Matsuoka, J                                                                                                                                                                                                                               | 2015 |



|                                                                                                                                                                                                                                                                                    |                                                                                                                                                                                                             |      |
|------------------------------------------------------------------------------------------------------------------------------------------------------------------------------------------------------------------------------------------------------------------------------------|-------------------------------------------------------------------------------------------------------------------------------------------------------------------------------------------------------------|------|
| single administration of alfacalcidol in postmenopausal women receiving aromatase inhibitor as adjuvant therapy                                                                                                                                                                    |                                                                                                                                                                                                             |      |
| The efficacy of host response modulation therapy (omega-3 plus low-dose aspirin) as an adjunctive treatment of chronic periodontitis (clinical and biochemical study)                                                                                                              | Elkhouli, AM                                                                                                                                                                                                | 2011 |
| PTEN as a prognostic and predictive marker in postoperative radiotherapy for squamous cell cancer of the head and neck                                                                                                                                                             | Snietura, , M, Jaworska, M, Mlynarczyk-Liszka, J, Goraj-Zajac, A, Piglowski, W, Lange, D, Wozniak, G, Nowara, E; Suwinski, R                                                                                | 2012 |
| Evaluation of treadmill exercise in a lower body negative pressure chamber as a countermeasure for weightlessness-induced bone loss: a bed rest study with identical twins                                                                                                         | Smith, , SM, Davis-Street, JE, Fesperman, JV, Calkins, DS, Bawa, M, Macias, BR, Meyer, RS; Hargens, AR                                                                                                      | 2003 |
| Effect of high-protein meals during hemodialysis combined with lanthanum carbonate in hypoalbuminemic dialysis patients: findings from the FrEDI randomized controlled trial                                                                                                       | Rhee, , CM, You, AS, Koontz Parsons, T, Tortorici, AR, Bross, R, St-Jules, DE, Jing, J, Lee, ML, Benner, D, Kovesdy, CP, Mehrotra, R, Kopple, JD; Kalantar-Zadeh, K                                         | 2017 |
| Biochemical markers of bone turnover associated with calcium supplementation in children with juvenile rheumatoid arthritis: results of a double-blind, placebo-controlled intervention trial                                                                                      | Carrasco, , R, Lovell, DJ, Giannini, EH, Henderson, CJ, Huang, B, Kramer, S, Ranz, J, Heubi, J; Glass, D                                                                                                    | 2008 |
| Chemerin and IL-6 Levels in Diabetes and Periodontitis                                                                                                                                                                                                                             | NCT02596581                                                                                                                                                                                                 | 2015 |
| Treatment of poor-risk myelodysplastic syndromes and acute myeloid leukemia with a combination of 5-azacytidine and valproic acid                                                                                                                                                  | Kuendgen, , A, Bug, G, Ottmann, OG, Haase, D, Schanz, J, Hildebrandt, B, Nachtkamp, K, Neukirchen, J, Dienst, A, Haas, R, Germing, U; Gattermann, N                                                         | 2011 |
| Effect of Periodontitis on Bone Mineral Density in Postmenopausal Women                                                                                                                                                                                                            | NCT02628197                                                                                                                                                                                                 | 2015 |
| The Intraocular Cytokine Profile and Therapeutic Response in Persistent Neovascular Age-Related Macular Degeneration                                                                                                                                                               | Rezar-Dreindl, , S, Sacu, S, Eibenberger, K, Pollreis, A, Bühl, W, Georgopoulos, M, Krall, C, Weigert, G; Schmidt-Erfurth, U                                                                                | 2016 |
| The effect of leptin replacement on parathyroid hormone, RANKL-osteoprotegerin axis, and Wnt inhibitors in young women with hypothalamic amenorrhea                                                                                                                                | Foo, , JP, Polyzos, SA, Anastasilakis, AD, Chou, S; Mantzoros, CS                                                                                                                                           | 2014 |
| Comparison of the Effect of Teflon vs Non-Teflon Hand Scalers in the Maintenance of Peri-Implant Tissue                                                                                                                                                                            | NCT03316937                                                                                                                                                                                                 | 2017 |
| Novel biomarkers to detect infection in revision hip and knee arthroplasties infection                                                                                                                                                                                             | Glehr, , M, Friesenbichler, J, Hofmann, G, Bernhardt, GA, Zacherl, M, Avian, A, Windhager, R; Leithner, A                                                                                                   | 2013 |
| Non-surgical Periodontal Therapy and Myo-inositol in Polycystic Ovary Syndrome Women Having Chronic Periodontitis                                                                                                                                                                  | NCT02633462                                                                                                                                                                                                 | 2015 |
| Changes in bone turnover and in bone mass in women with breast cancer switched from tamoxifen to exemestane                                                                                                                                                                        | Gonnelli, , S, Cadiri, A, Caffarelli, C, Petrioli, R, Montagnani, A, Franci, MB, Lucani, B, Francini, G; Nuti, R                                                                                            | 2007 |
| Comparison of Nd: YAG laser versus scaling and root planing in periodontal therapy                                                                                                                                                                                                 | Liu, , CM, Hou, LT, Wong, MY; Lan, WH                                                                                                                                                                       | 1999 |
| Perforated Collagen Membrane With Nanohydroxyapatite for Intrabony Defects                                                                                                                                                                                                         | NCT03399279                                                                                                                                                                                                 | 2018 |
| Efficacy and Safety of ABT-494, a Selective JAK-1 Inhibitor, in a Phase IIb Study in Patients With Rheumatoid Arthritis and an Inadequate Response to Methotrexate                                                                                                                 | Genovese, , MC, Smolen, JS, Weinblatt, ME, Burmester, GR, Meerwein, S, Camp, HS, Wang, L, Othman, AA, Khan, N, Pagan, AL; Jungerwirth, S                                                                    | 2016 |
| Growth hormone treatment during hemodialysis in a randomized trial improves nutrition, quality of life, and cardiovascular risk                                                                                                                                                    | Feldt-Rasmussen, , B, Lange, M, Sulowicz, W, Gafter, U, Lai, KN, Wiedemann, J, Christiansen, JS; El Nahas, M                                                                                                | 2007 |
| Clinical outcomes and fusion rates following anterior lumbar interbody fusion with bone graft substitute i-FACTOR, an anorganic bone matrix/P-15 composite                                                                                                                         | Mobbs, , RJ, Maharaj, M; Rao, PJ                                                                                                                                                                            | 2014 |
| Effects of fermentable high fiber diet supplementation on gut derived and conventional nitrogenous product in patients on maintenance hemodialysis: a randomized controlled trial                                                                                                  | Khosroshahi, , HT, Abedi, B, Ghosazadeh, M, Samadi, A; Jouyban, A                                                                                                                                           | 2019 |
| The Effect of Different Dental Implant Surface Characteristics on Immunological and Microbiological Parameters                                                                                                                                                                     | NCT03693196                                                                                                                                                                                                 | 2018 |
| Heterotopic ossification following single-level anterior cervical discectomy and fusion: results from the prospective, multicenter, historically controlled trial comparing allograft to an optimized dose of rhBMP-2                                                              | Arnold, , PM, Anderson, KK, Selim, A, Dryer, RF; Kenneth Burkus, J                                                                                                                                          | 2016 |
| Long-term treatment of 12 children with chronic hypoparathyroidism: a randomized trial comparing synthetic human parathyroid hormone 1-34 versus calcitriol and calcium                                                                                                            | Winer, , KK, Sinaii, N, Reynolds, J, Peterson, D, Dowdy, K; Cutler, GB                                                                                                                                      | 2010 |
| Preoperative prediction of cancer-specific mortality after nephroureterectomy for patients with upper urinary tract urothelial carcinoma: preoperative multivariate model incorporating C-reactive protein                                                                         | Saito, , K, Ishioka, J, Fujii, Y, Matsuoaka, Y, Numao, N, Koga, F, Ohtsuka, Y, Arisawa, C, Kamata, S, Nagahama, K, Morimoto, S, Tsujii, T, Kitahara, S, Noro, A, Goto, S, Kageyama, Y, Yonese, J; Kihara, K | 2014 |
| Testosterone in Bariatric Patients                                                                                                                                                                                                                                                 | NCT03721497                                                                                                                                                                                                 | 2018 |
| A prospective, open-label, single center, cross-over, controlled, randomized, phase III study to test superiority of the oral solution of synthetic thyroxine compared to tablet preparation for treatment of hypothyroid patients under chronic gastric pump inhibitors treatment | EUCTR2013-000759-41-IT                                                                                                                                                                                      | 2013 |
| Effects of raloxifene on bone metabolism in hemodialysis patients with type 2 diabetes                                                                                                                                                                                             | Saito, , O, Saito, T, Asakura, S, Akimoto, T, Inoue, M, Ando, Y, Muto, S; Kusano, E                                                                                                                         | 2012 |
| Quality of Life in Motion: a combined physical exercise and psychosocial training program to improve physical fitness in children with cancer                                                                                                                                      | NTR1531                                                                                                                                                                                                     | 2008 |
| Improvement of glycated hemoglobin in Japanese subjects with type 2 diabetes by resolution of periodontal inflammation using adjunct topical antibiotics: results from the Hiroshima Study                                                                                         | Munenaga, , Y, Yamashina, T, Tanaka, J; Nishimura, F                                                                                                                                                        | 2013 |

|                                                                                                                                                                                                                                                                                                                 |                                                                                                                                                                                                      |      |
|-----------------------------------------------------------------------------------------------------------------------------------------------------------------------------------------------------------------------------------------------------------------------------------------------------------------|------------------------------------------------------------------------------------------------------------------------------------------------------------------------------------------------------|------|
| Local antibiotic therapy in peri- implant inflammation                                                                                                                                                                                                                                                          | IRCT2013100114847N1                                                                                                                                                                                  | 2014 |
| The short-term effects of low-level lasers as adjunct therapy in the treatment of periodontal inflammation                                                                                                                                                                                                      | Qadri, , T, Miranda, L, Tunér, J; Gustafsson, A                                                                                                                                                      | 2005 |
| Switch from tenofovir/emtricitabine to raltegravir in female HIV-positive patients taking atazanavir/ritonavir evaluating bone mineral density improvement after one year                                                                                                                                       | EUCTR2013-002349-12-IT                                                                                                                                                                               | 2013 |
| Clinical significance of increased serum levels of FGF23 in fibrous dysplasia                                                                                                                                                                                                                                   | Florez, , H, Mandelikova, S, Filella, X, Monegal, A, Guanabens, N; Peris, P                                                                                                                          | 2017 |
| A clinical study (phase 2) in hereditary Rickets (XLH) in children to assess the safety and working of the antibody anti-FGF23                                                                                                                                                                                  | EUCTR2014-000406-35-FR                                                                                                                                                                               | 2015 |
| Feasibility and Efficacy of Interval Walking in Patients With Colorectal Cancer                                                                                                                                                                                                                                 | NCT02403024                                                                                                                                                                                          | 2015 |
| clinical trial to evaluate the efficacy in the infusion with mononuclear autologous bone marrow stem cells in patients with ischemic stroke                                                                                                                                                                     | EUCTR2013-002135-15-ES                                                                                                                                                                               | 2014 |
| IL-1 in gingival crevicular fluid following closed root planing and papillary flap debridement                                                                                                                                                                                                                  | Reinhardt, , RA, Masada, MP, Johnson, GK, DuBois, LM, Seymour, GJ; Allison, AC                                                                                                                       | 1993 |
| A trial to determine the how safe and effective the test drug is for obese males with hypogonadotropic hypogonadism. The trial is blinded and the subjects may be given the test drug or a placebo                                                                                                              | EUCTR2015-005760-42-GB                                                                                                                                                                               | 2016 |
| Evaluation of treatment for isolated bilateral miller's class i or II gingival recession with platelet rich fibrin membrane- A comparative study                                                                                                                                                                | Shivakumar, , MA, Gopal, SV, Govindaraju, P, Ramayya, S, Bennadi, D; Mruthyuenjaya, RK                                                                                                               | 2016 |
| Evaluation of peri-implant mucositis at microgrooved and machined abutments: a two-center study                                                                                                                                                                                                                 | DRKS00009394                                                                                                                                                                                         | 2015 |
| Osteoporosis and bone metabolism in systemic sclerosis                                                                                                                                                                                                                                                          | Horvath, , A, Gulyas, K, Bhattoa, HP, Szucs, G, Szekanecz, Z; Szamosi, S                                                                                                                             | 2017 |
| A Phase 2, Multi-center, Randomized, Double-blind, Placebo-controlled, Multiple-dose Study to Determine the Safety and Efficacy of Daily Orally Administered LX3305 in Subjects with Active Rheumatoid Arthritis (RA) on Stable Methotrexate (MTX) Therapy - LX3305.201                                         | EUCTR2009-012705-19-BG                                                                                                                                                                               | 2009 |
| Denosumab increases sublesional bone mass in osteoporotic patients with recent spinal cord injury                                                                                                                                                                                                               | Vidal, , J, Carrasco, JL, Muxi, A, Portell, E, Monegal, A, Guanabens, N; Peris, P                                                                                                                    | 2015 |
| Leptin is an effective treatment for hypothalamic amenorrhea                                                                                                                                                                                                                                                    | Chou, , SH, Chamberland, JP, Liu, X, Matarese, G, Gao, C, Stefanakis, R, Brinkoetter, MT, Gong, H, Arampatzi, K; Mantzoros, CS                                                                       | 2011 |
| Influence of modified transdermal hormone replacement therapy on the concentrations of hormones, growth factors, and bone mineral density in women with osteopenia                                                                                                                                              | Stanosz, , S, Zochowska, E, Safranow, K, Sieja, K; Stanosz, M                                                                                                                                        | 2009 |
| BENEFIT study                                                                                                                                                                                                                                                                                                   | NTR1274                                                                                                                                                                                              | 2008 |
| Investigating the role of targeted therapy Sorafenib - the Fms-like tyrosine kinase 3 (FLT3) inhibitor, in combination with intensive chemotherapy, for previously untreated adult patients with Acute Myeloid Leukaemia (AML) with FLT3 mutations. A Phase II randomised placebo-controlled multi-centre study | ACTRN12611001112954                                                                                                                                                                                  | 2011 |
| A trial comparing continuous subcutaneous hydrocortisone therapy with conventional oral glucocorticoid therapy in congenital adrenal hyperplasia                                                                                                                                                                | EUCTR2011-005822-23-NO                                                                                                                                                                               | 2013 |
| Cabozantinib (XL184) in patients with metastatic breast cancer: results from a phase 2 randomized discontinuation trial                                                                                                                                                                                         | Tolaney, , SM, Nechushtan, H, Berger, R, Kurzrock, R, Ron, IG, Schoffski, P, Awada, A, Yashenchak, CA, Burris, HA, Ramies, DA, Shen, X; Winer, EP                                                    | 2011 |
| Efficacy, safety, and confirmation of the recommended phase 2 starting dose of the combination of ruxolitinib (RUX) and panobinostat (PAN) in patients (pts) with myelofibrosis (MF)                                                                                                                            | Harrison, , CN, Kiladjian, J-J, Heidel, FH, Vannucchi, AM, Passamonti, F, Hayat, A, Conneally, E, Martino, B, Kindler, T, Lipka, DB, Acharyya, S, Gopalakrishna, P, Ide, S, Liu, T, Mu, S; Ribrag, V | 2015 |
| A randomized Phase II, open label multicenter cross-over study, to evaluate biomarkers, in 2nd line treatment of metastatic Castration Resistant Prostate Cancer (mCRPC) with abiraterone and cabazitaxel                                                                                                       | EUCTR2015-000270-36-SE                                                                                                                                                                               | 2015 |
| Randomized, double-blind, placebo controlled Phase II study to evaluate the efficacy and safety of Sorafenib treatment in patients with advanced (recurrent, persistent and/or metastasizing) medullary thyroid carcinoma (SUMMIT)                                                                              | DRKS00004455                                                                                                                                                                                         | 2012 |
| Comparative effect of nimesulide and ibuprofen on the urinary levels of collagen type II C-telopeptide degradation products and on the serum levels of hyaluronan and matrix metalloproteinases-3 and -13 in patients with flare-up of osteoarthritis                                                           | Manicourt, , DH, Bevilacqua, M, Righini, V, Famaey, JP; Devogelaer, JP                                                                                                                               | 2005 |
| Comparative analysis in implant-supported metal ceramic and hybrid ceramic crown                                                                                                                                                                                                                                | RBR-9w9m83                                                                                                                                                                                           | 2018 |
| What is the clinical relevance of radiographic nonunion after single-level lumbar interbody arthrodesis in degenerative disc disease?: a meta-analysis of the YODA project database                                                                                                                             | Noshchenko, , A, Lindley, EM, Burger, EL, Cain, CMJ; Patel, VV                                                                                                                                       | 2016 |
| A study to examine the safety, tolerability and effects on abnormal bone formation of REGN2477 in patients with Fibrodysplasia Ossificans Progressiva                                                                                                                                                           | EUCTR2016-005035-33-IT                                                                                                                                                                               | 2018 |
| Effect of Nonsurgical Periodontal Therapy Verses Oral Hygiene Instructions on Patients With Chronic Periodontitis                                                                                                                                                                                               | NCT02208739                                                                                                                                                                                          | 2014 |
| Platelet concentrates derived from own blood for the treatment of jaw bone defect caused by gum disease                                                                                                                                                                                                         | CTRI/2018/12/016566                                                                                                                                                                                  | 2018 |

|                                                                                                                                                                                                                                                        |                                                                                                                                                                                                                                                                                                                 |      |
|--------------------------------------------------------------------------------------------------------------------------------------------------------------------------------------------------------------------------------------------------------|-----------------------------------------------------------------------------------------------------------------------------------------------------------------------------------------------------------------------------------------------------------------------------------------------------------------|------|
| Changes in bone turnover after parathyroidectomy in dialysis patients: role of calcitriol administration                                                                                                                                               | Mazzaferro, , S, Chicca, S, Pasquali, M, Zaraca, F, Ballanti, P, Taggi, F, Coen, G, Cinotti, GA; Carboni, M                                                                                                                                                                                                     | 2000 |
| Platelet rich fibrin in periodontal surgery                                                                                                                                                                                                            | ISRCTN13520922                                                                                                                                                                                                                                                                                                  | 2018 |
| Dendritic cell-based immunotherapy targeting the tumor protein WT1 to treat adult patients with acute myeloid leukemia                                                                                                                                 | EUCTR2012-001494-91-BE                                                                                                                                                                                                                                                                                          | 2012 |
| Laser-assisted delivery of vitamin C, vitamin E, and ferulic acid formula serum decreases fractional laser postoperative recovery by increased beta fibroblast growth factor expression                                                                | Waibel, , JS, Mi, QS, Ozog, D, Qu, L, Zhou, L, Rudnick, A, Al-Niaimi, F, Woodward, J, Campos, V; Mordon, S                                                                                                                                                                                                      | 2016 |
| A PROSPECTIVE, PILOT, CROSS-OVER STUDY TO ASSESS THE EFFICACY OF PARICALCITOL IN REDUCING PARATHYROID HORMONE LEVELS AND AMELIORATING MARKERS OF BONE REMODELLING IN RENAL TRANSPLANT RECIPIENTS WITH SECONDARY HYPERPARATHYROIDISM (APPLE STUDY) - ND | EUCTR2008-006380-36-IT                                                                                                                                                                                                                                                                                          | 2008 |
| Meditation interventions for treatment of PTSD in veterans                                                                                                                                                                                             | Lim, , K, Erbes, C, Thuras, P, Rodman, J, Sponheim, S; Polusny, M                                                                                                                                                                                                                                               | 2014 |
| A study of the Combination of Ibrutinib plus Venetoclax versus Chlorambucil plus Obinutuzumab for the First-line Treatment of Patients with Chronic Lymphocytic Leukemia (CLL)/Small Lymphocytic Lymphoma (SLL)                                        | EUCTR2017-004699-77-PL                                                                                                                                                                                                                                                                                          | 2018 |
| The effect of recombinant human bone morphogenetic protein-2 in single-level posterior lumbar interbody arthrodesis                                                                                                                                    | Chutkan, NB                                                                                                                                                                                                                                                                                                     | 2013 |
| Ketogenic diets as an adjuvant therapy in glioblastoma (the KEATING trial)                                                                                                                                                                             | ISRCTN71665562                                                                                                                                                                                                                                                                                                  | 2017 |
| Doxycycline speeds up healing of chronic venous ulcers                                                                                                                                                                                                 | Serra, , R, Gallelli, L, Buffone, G, Molinari, V, Stillitano, DM, Palmieri, C; de Franciscis, S                                                                                                                                                                                                                 | 2015 |
| Therapeutic efficacy of magnesium oxide for peripheral artery disease among patients undergoing hemodialysis - Open label randomized controlled trial                                                                                                  | JPRN-UMIN000024275                                                                                                                                                                                                                                                                                              | 2016 |
| A preliminary trial of the effect of recombinant human growth hormone on short-term linear growth and glucose homeostasis in children with Crohn's disease                                                                                             | Wong, , SC, Kumar, P, Galloway, PJ, Blair, JC, Didi, M, Dalzell, AM, Hassan, K, McGrogan, P; Ahmed, SF                                                                                                                                                                                                          | 2011 |
| A Phase 2, Open Label, Randomized, Dose Ranging, Safety, Efficacy, Pharmacokinetic and Pharmacodynamic Study of AG-348 in Adult Patients with Pyruvate Kinase Deficiency                                                                               | EUCTR2015-000484-13-GB                                                                                                                                                                                                                                                                                          | 2015 |
| Effect of recent spinal cord injury on the OPG/RANKL system and its relationship with bone loss and antiosteoporotic response to denosumab therapy                                                                                                     | Gifre, , L, Vidal, J, Ruiz-Gasca, S, Portell, E, Monegal, A, Muxi, A, Guanabens, N; Peris, P                                                                                                                                                                                                                    | 2017 |
| Statin- and bisphosphonate treatment in patients with the Philadelphia-negative chronic myeloproliferative neoplasms - essential thrombocythosis, polycythemia vera and hypercellular myelofibrosis                                                    | EUCTR2016-001406-42-DK                                                                                                                                                                                                                                                                                          | 2016 |
| Salivary biomarkers of periodontal disease in response to treatment                                                                                                                                                                                    | Sexton, , WM, Lin, Y, Kryscio, RJ, Dawson, DR, Ebersole, JL; Miller, CS                                                                                                                                                                                                                                         | 2011 |
| Randomized double-blind placebo controlled Phase II study to evaluate the efficacy and safety of Sorafenib treatment in patients with advanced (recurrent, persistent and/or metastasizing) medullary thyroid carcinoma (SUMMIT)                       | EUCTR2011-006250-90-DE                                                                                                                                                                                                                                                                                          | 2012 |
| TBCRC 008: early change in 18F-FDG uptake on PET predicts response to preoperative systemic therapy in human epidermal growth factor receptor 2-negative primary operable breast cancer                                                                | Connolly, , RM, Leal, JP, Goetz, MP, Zhang, Z, Zhou, XC, Jacobs, LK, Mhlanga, J, O, JH, Carpenter, J, Storniolo, AM, Watkins, S, Fetting, JH, Miller, RS, Sideras, K, Jeter, SC, Walsh, B, Powers, P, Zorzi, J, Boughey, JC, Davidson, NE, Carey, LA, Wolff, AC, Khouri, N, Gabrielson, E, Wahl, RL; Stearns, V | 2015 |
| Effects of exercise on Sexual function and Cardiovascular health in men with prostate cancer (ESCA) Study                                                                                                                                              | ACTRN12619000143123                                                                                                                                                                                                                                                                                             | 2019 |
| Immunological predictors of overall survival in treatment naive metastatic pancreatic cancer patients                                                                                                                                                  | Farren, , MR, Mace, T, Geyer, S, Mikhail, S, Wu, C, Ciombor, K, Tahiri, S, Ahn, D, Noonan, A, Villalona-Calero, M, Bekaii-Saab, T; Lesinski, G                                                                                                                                                                  | 2015 |
| A PHASE I/II, OPEN LABEL STUDY OF SPC2996 IN COMBINATION WITH RITUXIMAB FOR THE TREATMENT OF RELAPSED FOLLICULAR OR LYMPHOPLASMACYTIC NON-HODGKIN'S LYMPHOMA                                                                                           | EUCTR2008-001353-17-HU                                                                                                                                                                                                                                                                                          | 2008 |
| Bone metabolism changes during anti-TNF-alpha therapy in patients with active rheumatoid arthritis                                                                                                                                                     | Seriolo, , B, Paolino, S, Sulli, A, Ferretti, V; Cutolo, M                                                                                                                                                                                                                                                      | 2006 |
| A randomised, open label, prospective study to assess two different therapeutic strategies following first treatment failure in HIV-1 infected subjects. 'The First Failure Study' : 'FAST' - The First Failure Study                                  | EUCTR2009-011816-39-GB                                                                                                                                                                                                                                                                                          | 2010 |
| Postoperative radiotherapy after radical prostatectomy: a randomised controlled trial (EORTC trial 22911)                                                                                                                                              | Bolla, , M, van Poppel, H, Collette, L, van Cangh, P, Vekemans, K, Da Pozzo, L, de Reijke, TM, Verbaeys, A, Bosset, JF, van Velthoven, R, Maréchal, JM, Scalliet, P, Haustermans, K; Piérart, M                                                                                                                 | 2005 |
| Application of laser assisted anti-infection therapy for the gum disease around dental implants                                                                                                                                                        | IRCT201609281248N3                                                                                                                                                                                                                                                                                              | 2016 |
| Interleukin-3 in vivo: kinetic of response of target cells                                                                                                                                                                                             | Aglietta, , M, Sanavio, F, Stacchini, A, Morelli, S, Fubini, L, Severino, A, Pasquino, P, Volta, C, Bretti, S; Tafuto, S                                                                                                                                                                                        | 1993 |
| Constitutional Delay of Growth and Puberty: towards evidence-based treatment                                                                                                                                                                           | EUCTR2012-002477-59-FI                                                                                                                                                                                                                                                                                          | 2012 |

|                                                                                                                                                                                                                                       |                                                                                                                                                                                                                               |      |
|---------------------------------------------------------------------------------------------------------------------------------------------------------------------------------------------------------------------------------------|-------------------------------------------------------------------------------------------------------------------------------------------------------------------------------------------------------------------------------|------|
| Dynamic contrast-enhanced magnetic resonance imaging as a surrogate biomarker for bevacizumab in colorectal cancer liver metastasis: a single-arm, exploratory trial                                                                  | Kim, , Y-E, Joo, B, Park, M-S, Shin, SJ, Ahn, JB; Kim, M-J                                                                                                                                                                    | 2016 |
| Treatment with Long Acting hGH Product in Adult subjects with Growth Hormone Deficiency                                                                                                                                               | EUCTR2013-000830-37-AT                                                                                                                                                                                                        | 2013 |
| The influence of denosumab on the immune system in women after the menopause with HER2 negative breastcancer                                                                                                                          | EUCTR2016-005210-22-NL                                                                                                                                                                                                        | 2017 |
| Effects of laser moxibustion on patients with knee osteoarthritis                                                                                                                                                                     | ISRCTN15030019                                                                                                                                                                                                                | 2017 |
| Changes in inflammation and bone turnover markers after treatment for periodontal disease in patients with diabetes                                                                                                                   | Izuora, , KE, Ezeanolue, E, Neubauer, M, Gewelber, C, Allenback, G, Shan, G; Umpierrez, GE                                                                                                                                    | 2015 |
| Clinical trial to investigate efficacy and safety of FE 203799 (GLP-2 analogue) or placebo administered as subcutaneous injections once weekly in two treatment periods to patients with short bowel syndrome with intestinal failure | EUCTR2017-002486-21-DK                                                                                                                                                                                                        | 2017 |
| Singapore Health and Biomedical Congress, SHBC 2013                                                                                                                                                                                   |                                                                                                                                                                                                                               | 2013 |
| Study of XL184 in subjects with advanced solid tumors                                                                                                                                                                                 | EUCTR2009-012964-14-BE                                                                                                                                                                                                        | 2009 |
| Evaluation of the usefulness of suction drainage in the treatment of nonspecific bone infections monitored with C-reactive protein                                                                                                    | Milankov, , M, Jovanović, A, Milčić, A, Somer, T, Vukadinović, S; Savić, D                                                                                                                                                    | 1999 |
| Down's syndrome in children males – biochemical characterisations in different media using non-randomised trial and systematic study                                                                                                  | DRKS00014074                                                                                                                                                                                                                  | 2018 |
| How Bone is Made in Children Receiving Dialysis                                                                                                                                                                                       | NCT01799317                                                                                                                                                                                                                   | 2013 |
| suPERficial slow-flow vascular malFORMations treated with sirolimus                                                                                                                                                                   | EUCTR2015-001096-43-FR                                                                                                                                                                                                        | 2015 |
| A phase 2, randomized, placebo-controlled study evaluating matrix metalloproteinase-9 inhibitor, andecaliximab, in patients with moderately to severely active Crohn's disease                                                        | Schreiber, , S, Siegel, CA, Friedenberg, KA, Younes, ZH, Seidler, U, Bhandari, BR, Wang, K, Wendt, E, McKevitt, M, Zhao, S, Sundry, JS, Lee, SD; Loftus, EV                                                                   | 2018 |
| Effect of testosterone in male patients on regular hemodialysis                                                                                                                                                                       | EUCTR2011-005439-20-SE                                                                                                                                                                                                        | 2011 |
| Translational Biomarkers and Ex Vivo Models of Joint Tissues as a Tool for Drug Development in Rheumatoid Arthritis                                                                                                                   | Kjelgaard-Petersen, , CF, Platt, A, Braddock, M, Jenkins, MA, Musa, K, Graham, E, Gantzel, T, Slynn, G, Weinblatt, ME, Karsdal, MA, Thudium, CS; Bay-Jensen, A-C                                                              | 2018 |
| The healing of pressure ulcers treated with electrical stimulation delivered by the cathode versus the alternating use of the cathode and anode                                                                                       | ACTRN12614000992606                                                                                                                                                                                                           | 2014 |
| Improved treatment of mandibular odontogenic cysts with platelet-rich gel                                                                                                                                                             | Cieslik-Bielecka, , A, Bielecki, T, Gazdzik, TS, Cieslik, T; Szczepanski, T                                                                                                                                                   | 2008 |
| BA058 Transdermal Phase 2 Study in Women with Osteoporosis                                                                                                                                                                            | EUCTR2012-001921-29-DK                                                                                                                                                                                                        | 2012 |
| Quantification of surgical trauma: comparison of posterolateral surgical approach and anterior minimally invasive (AMIS) for total hip arthroplasty based on markers of inflammation (interleukins). Preliminary report               |                                                                                                                                                                                                                               | 2014 |
| Evaluation of pneumococcal conjugate vaccine (Prevenar) in patients with myeloma and chronic lymphocytic leukaemia                                                                                                                    | ISRCTN21541376                                                                                                                                                                                                                | 2006 |
| Bioidentical 'Natural' Hormone Evaluation in Early Menopause                                                                                                                                                                          | NCT00302731                                                                                                                                                                                                                   | 2006 |
| A Randomized Trial of Bortezomib in Late Antibody-Mediated Kidney Transplant Rejection                                                                                                                                                | Eskandary, , F, Regele, H, Baumann, L, Bond, G, Kozakowski, N, Wahrmann, M, Hidalgo, LG, Haslacher, H, Kaltenecker, CC, Aretin, MB, Oberbauer, R, Posch, M, Staudenherz, A, Handisurya, A, Reeve, J, Halloran, PF; Böhmig, GA | 2018 |
| Adjunctive treatment of chronic periodontitis with daily dietary supplementation with omega-3 Fatty acids and low-dose aspirin                                                                                                        | El-Sharkawy, , H, Aboelsaad, N, Eliwa, M, Darweesh, M, Alshahat, M, Kantarci, A, Hasturk, H; Van Dyke, TE                                                                                                                     | 2010 |
| Molecular profiling of postmenopausal women with breast cancer on neoadjuvant exemestane or tamoxifen                                                                                                                                 | EUCTR2005-001698-89-GB                                                                                                                                                                                                        | 2006 |
| Nivolumab for pediatric and adult relapsing/refractory ALK+ anaplastic large cell lymphoma in patients with progressive disease or in patients in complete remission after relapse                                                    | EUCTR2018-001447-31-FR                                                                                                                                                                                                        | 2018 |
| Changes in fibroblast growth factor 23 during treatment of secondary hyperparathyroidism with alfacalcidol or paricalcitol                                                                                                            | Hansen, , D, Rasmussen, K, Pedersen, SM, Rasmussen, LM; Brandt, L                                                                                                                                                             | 2012 |
| Relationship of herpes virus with interleukin in gum diseases                                                                                                                                                                         | CTRI/2018/07/015141                                                                                                                                                                                                           | 2018 |
| Clinical outcomes and fusion success at 2 years of single-level instrumented posterolateral fusions with recombinant human bone morphogenetic protein-2/compression resistant matrix versus iliac crest bone graft                    | Dimar, , JR, Glassman, SD, Burkus, KJ; Carreon, LY                                                                                                                                                                            | 2006 |
| Comparative Study of Maxillary Bone Preservation after Dental Extraction with Different Biomaterials                                                                                                                                  | RBR-29nbjw                                                                                                                                                                                                                    | 2018 |
| Effect of rhPDGF-BB delivery on mediators of periodontal wound repair                                                                                                                                                                 | Cooke, , JW, Sarment, DP, Whitesman, LA, Miller, SE, Jin, Q, Lynch, SE; Giannobile, WV                                                                                                                                        | 2006 |
| The influence of cathodal and anodal electrical stimulation on skin blood flow and the healing of pressure ulcers                                                                                                                     | ACTRN12615001281583                                                                                                                                                                                                           | 2015 |
| Extended-release calcifediol (ERC) improves bone marker levels in CKD patients with diabetes                                                                                                                                          |                                                                                                                                                                                                                               | 2018 |
| A clinical trial of allogeneic mesenchymal precursor cells (MPCs) in the treatment of heart attacks                                                                                                                                   | EUCTR2010-020497-41-ES                                                                                                                                                                                                        | 2014 |

|                                                                                                                                                                                                                                                                                                                                                        |                                                                                                                                                                                                                                      |      |
|--------------------------------------------------------------------------------------------------------------------------------------------------------------------------------------------------------------------------------------------------------------------------------------------------------------------------------------------------------|--------------------------------------------------------------------------------------------------------------------------------------------------------------------------------------------------------------------------------------|------|
| Effect of dietary supplementation with collagen hydrolysates on bone metabolism of postmenopausal women with low mineral density                                                                                                                                                                                                                       | Cúneo, , F, Costa-Paiva, L, Pinto-Neto, AM, Morais, SS; Amaya-Farfan, J                                                                                                                                                              | 2010 |
| A pilot 24-week open-label, randomized, controlled clinical trial to assess the safety, tolerability and efficacy of dual therapy with Raltegravir/Lamivudine combination when replacing standard combination therapy in HIV-infected patients with prolonged virological suppression. RALAM Study                                                     | EUCTR2014-003142-27-ES                                                                                                                                                                                                               | 2015 |
| International collaborative treatment protocol for children and adolescents with acute lymphoblastic leukemia                                                                                                                                                                                                                                          | EUCTR2007-004270-43-DE                                                                                                                                                                                                               | 2009 |
| The effects of denosumab and alendronate on glucocorticoid-induced osteoporosis in patients with glomerular disease: a randomized, controlled trial                                                                                                                                                                                                    |                                                                                                                                                                                                                                      | 2018 |
| Effect of cathodal and anodal electrical stimulation on pressure ulcer healing                                                                                                                                                                                                                                                                         | ACTRN12616001709437                                                                                                                                                                                                                  | 2016 |
| A study of the Combination of Ibrutinib plus Venetoclax versus Chlorambucil plus Obinutuzumab for the First-line Treatment of Patients with Chronic Lymphocytic Leukemia (CLL)/Small Lymphocytic Lymphoma (SLL)                                                                                                                                        | EUCTR2017-004699-77-NL                                                                                                                                                                                                               | 2018 |
| Cinacalcet hydrochloride reduces the serum calcium concentration in inoperable parathyroid carcinoma                                                                                                                                                                                                                                                   | Silverberg, , SJ, Rubin, MR, Faiman, C, Peacock, M, Shoback, DM, Smallridge, RC, Schwanauer, LE, Olson, KA, Klassen, P; Bilezikian, JP                                                                                               | 2007 |
| A Study to Assess the efficacy and the safety of Vamorolone in Boys with Duchenne Muscular Dystrophy (DMD)                                                                                                                                                                                                                                             | EUCTR2017-002704-27-SE                                                                                                                                                                                                               | 2018 |
| A study investigating the use of additional chemotherapy for the improvement of efficacy, and the selection of breast cancer patients for such treatment in two patient cohorts: before surgery in curable patients and at time of metastatic disease                                                                                                  | EUCTR2013-004418-17-NO                                                                                                                                                                                                               | 2014 |
| Effects of prasterone (dehydroepiandrosterone) on markers of cardiovascular risk and bone turnover in premenopausal women with systemic lupus erythematosus: a pilot study                                                                                                                                                                             | Marder, , W, Somers, EC, Kaplan, MJ, Anderson, MR, Lewis, EE; McCune, WJ                                                                                                                                                             | 2010 |
| The effect of plasma rich in growth factors in treatment of gingival recession                                                                                                                                                                                                                                                                         | IRCT201201168747N1                                                                                                                                                                                                                   | 2012 |
| Peri-interventional endothelin-a receptor blockade improves long-term outcome in patients with ST-elevation acute myocardial infarction                                                                                                                                                                                                                | Adlbrecht, , C, Wurm, R, Humenberger, M, Andreas, M, Redwan, B, Distelmaier, K, Klappacher, G; Lang, IM                                                                                                                              | 2014 |
| Weight loss and bone health in postmenopausal breast cancer survivors                                                                                                                                                                                                                                                                                  | Toriola, , AT, Liu, J, Ganz, PA, Colditz, GA, Yang, L, Izadi, S, Schwartz, AL; Wolin, KY                                                                                                                                             | 2015 |
| Changes in bone mineral density in women following 1-year gastric bypass surgery                                                                                                                                                                                                                                                                       | Casagrande, , DS, Repetto, G, Mottin, CC, Shah, J, Pietrobon, R, Worni, M; Schaan, BD                                                                                                                                                | 2012 |
| Melatonin-micronutrients Osteopenia Treatment Study (MOTS): a translational study assessing melatonin, strontium (citrate), vitamin D3 and vitamin K2 (MK7) on bone density, bone marker turnover and health related quality of life in postmenopausal osteopenic women following a one-year double-blind RCT and on osteoblast-osteoclast co-cultures |                                                                                                                                                                                                                                      | 2017 |
| The Immune and Clinical Impacts of Vitamin D in Patients With Chronic Musculo-skeletal Pain                                                                                                                                                                                                                                                            | NCT01417923                                                                                                                                                                                                                          | 2011 |
| Effects of sub-antimicrobial dose doxycycline therapy on crevicular fluid MMP-8, and gingival tissue MMP-9, TIMP-1 and IL-6 levels in chronic periodontitis                                                                                                                                                                                            | Choi, , DH, Moon, IS, Choi, BK, Paik, JW, Kim, YS, Choi, SH; Kim, CK                                                                                                                                                                 | 2004 |
| Randomized controlled trial of pericardial blood processing with a cell-saving device on neurologic markers in elderly patients undergoing coronary artery bypass graft surgery                                                                                                                                                                        | Carrier, , M, Denault, A, Lavoie, J; Perrault, LP                                                                                                                                                                                    | 2006 |
| The effect of sitagliptin on markers of bone metabolism in patients with type 2 diabetes mellitus                                                                                                                                                                                                                                                      | Gilbert, , MP, Bunn, JY, Maple, R, Christian, R; Pratley, RE                                                                                                                                                                         | 2010 |
| Prognostic Utility of Biomarkers in Predicting of One-Year Outcomes in Patients with Aortic Stenosis Treated with Transcatheter or Surgical Aortic Valve Implantation                                                                                                                                                                                  | Parenica, , J, Nemec, P, Tomandl, J, Ondrasek, J, Pavkova-Goldbergova, M, Tretina, M, Jarkovsky, J, Littnerova, S, Poloczek, M, Pokorny, P, Spinar, J, Cermakova, Z, Miklik, R, Malik, P, Pes, O, Lipkova, J, Tomandlova, M; Kala, P | 2012 |
| Combined Intra-articular Shoulder Injection and Stellate Ganglion Block in Chronic Post-mastectomy Shoulder Pain                                                                                                                                                                                                                                       | NCT03586154                                                                                                                                                                                                                          | 2018 |
| Effect of CoQ10 on rheumatoid arthritis                                                                                                                                                                                                                                                                                                                | IRCT201311014105N16                                                                                                                                                                                                                  | 2013 |
| Effect of cleaning teeth in the levels of c-reactive protein in the blood of patients with severe disease in teeth and bone of the maxilla and mandible                                                                                                                                                                                                | RBR-24t799                                                                                                                                                                                                                           | 2012 |
| Recombinant human IL-12 but not filgrastim decrease allcause mortality in a primate model of acute radiation syndrome: results from blinded vehicle-controlled glp study                                                                                                                                                                               | Gluzman-Poltorak, , Z, Vainstein, V; Basile, L                                                                                                                                                                                       | 2014 |
| Efficacy and safety of AZD9056 200 mg once daily versus placebo in adult patients with active Crohn's disease – A randomized, double-blind, four week, parallel-group, multicentre, phase II study - POPCRON                                                                                                                                           | EUCTR2005-002319-26-AT                                                                                                                                                                                                               | 2006 |
| The Neurocognitive effects of Lacprodan(Registered Trademark) PL-20 in elderly participants with age-associated memory impairment                                                                                                                                                                                                                      | ACTRN12613000347763                                                                                                                                                                                                                  | 2013 |
| Influence of low voltage monophasic pulsed current and low voltage biphasic pulsed current on pressure ulcer healing based on clinical treatment effects and basic research                                                                                                                                                                            | ACTRN12618000345280                                                                                                                                                                                                                  | 2018 |
| Enhanced External Counterpulsation (EECP) in Patients with Ischaemic Heart Disease and Chronic Left Ventricular Systolic Dysfunction Evaluation                                                                                                                                                                                                        | ISRCTN67553357                                                                                                                                                                                                                       | 2005 |

|                                                                                                                                                                                                                                                                                                          |                                                                                                                                                                                                                                       |      |
|----------------------------------------------------------------------------------------------------------------------------------------------------------------------------------------------------------------------------------------------------------------------------------------------------------|---------------------------------------------------------------------------------------------------------------------------------------------------------------------------------------------------------------------------------------|------|
| The effect of subantimicrobial-dose-doxycycline periodontal therapy on serum biomarkers of systemic inflammation: a randomized, double-masked, placebo-controlled clinical trial                                                                                                                         | Payne, , JB, Golub, LM, Stoner, JA, Lee, HM, Reinhardt, RA, Sorsa, T; Slepian, MJ                                                                                                                                                     | 2011 |
| Insulin-like growth factors (IGFs) and IGF binding proteins in active Crohn's disease treated with omega-3 or omega-6 fatty acids and corticosteroids                                                                                                                                                    | Eivindson, , M, Grønbaek, H, Nielsen, JN, Frystyk, J, Flyvbjerg, A, Jørgensen, L, Vind, I, Munkholm, P, Jensen, S, Brandslund, I; Hey, H                                                                                              | 2005 |
| AIN457 shows a good safety profile and clinical benefit in patients with active rheumatoid arthritis (RA) despite methotrexate therapy: 16-weeks results from a randomized proof-of-concept trial                                                                                                        |                                                                                                                                                                                                                                       | 2009 |
| Clinical trials of a matrix metalloproteinase inhibitor in human periodontal disease. SDD Clinical Research Team                                                                                                                                                                                         | Ashley, RA                                                                                                                                                                                                                            | 1999 |
| Protocol of a randomised controlled, open-label trial of ex vivo normothermic perfusion versus static cold storage in donation after circulatory death renal transplantation                                                                                                                             | Hosgood, , SA, Saeb-Parsy, K, Wilson, C, Callaghan, C, Collett, D; Nicholson, ML                                                                                                                                                      | 2017 |
| Effect of intracanal medicaments on matrix metalloproteinase-9 and vasoactive intestinal peptide secretion in periapical lesions of re-treated canals: a randomized controlled clinical study                                                                                                            | Özdemir, , MB, Karataş, E, Albayrak, M; Bayır, Y                                                                                                                                                                                      | 2019 |
| Effect of periodontal surgery on osteoprotegerin levels in gingival crevicular fluid, saliva, and gingival tissues of chronic periodontitis patients                                                                                                                                                     | Hassan, , SH, El-Refai, MI, Ghallab, NA, Kasem, RF; Shaker, OG                                                                                                                                                                        | 2015 |
| Mechanisms of LPRF Action in the Promotion of Wound Healing and Tissue Regeneration                                                                                                                                                                                                                      | NCT03992638                                                                                                                                                                                                                           | 2019 |
| A novel dose reduction therapy using biological disease-modifying anti-rheumatic drugs to target matrix metalloproteinase 3 normalization together with a simplified disease activity index <3.3 yields effects non-inferior to standard care in rheumatoid arthritis with regards maintaining remission | Urata, , Y, Abe, S, Devers, B, Nakamura, Y, Takemoto, H; Furukawa, K-I                                                                                                                                                                | 2016 |
| Disodium pamidronate identifies differential osteoclastic bone resorption in metastatic prostate cancer                                                                                                                                                                                                  | Clarke, , NW, McClure, J; George, NJ                                                                                                                                                                                                  | 1992 |
| Therapeutic Approaches to Malnutrition Enteropathy                                                                                                                                                                                                                                                       | NCT03716115                                                                                                                                                                                                                           | 2018 |
| Efficacy of Roflumilast in Treatment of Severe Asthma                                                                                                                                                                                                                                                    | EUCTR2011-002101-29-DE                                                                                                                                                                                                                | 2011 |
| Clinical Efficacy of Permanent Internal Mammary Artery Occlusion in Stable Coronary Artery Disease                                                                                                                                                                                                       | NCT03710070                                                                                                                                                                                                                           | 2018 |
| Dental implants installed and restored provisionally immediately after tooth extraction in the aesthetic region of the smile                                                                                                                                                                             | RBR-8t6c99                                                                                                                                                                                                                            | 2018 |
| Evaluating the management of hyperphosphatemia with PA21 in dialysis patients-rationale and design of an open-label, randomised, active-controlled phase 3 study                                                                                                                                         | Tumlin, , J, Chong, E, Gaillard, S; Floege, J                                                                                                                                                                                         | 2012 |
| The effect of doxycycline and licorice therapy on gingival cervical fluid matrix metalloproteinase-8 levels in chronic periodontitis                                                                                                                                                                     | IRCT2012121611771N1                                                                                                                                                                                                                   | 2013 |
| Omega-3 Plus Low-dose Aspirin Daily Supplementation in Non-surgical Therapy to Treat Aggressive Periodontitis                                                                                                                                                                                            | NCT03093246                                                                                                                                                                                                                           | 2017 |
| The Efficacy of Plasma Rich in Growth Factors for the Treatment of Alveolar Osteitis: a Randomized Controlled Trial                                                                                                                                                                                      | King, , EM, Cerajewska, TL, Locke, M, Claydon, NCA, Davies, M; West, NX                                                                                                                                                               | 2018 |
| Linezolid Trough Concentrations Correlate with Mitochondrial Toxicity-Related Adverse Events in the Treatment of Chronic Extensively Drug-Resistant Tuberculosis                                                                                                                                         | Song, , T, Lee, M, Jeon, HS, Park, Y, Dodd, LE, Dartois, V, Follman, D, Wang, J, Cai, Y, Goldfeder, LC, Olivier, KN, Xie, Y, Via, LE, Cho, SN, Barry, CE; Chen, RY                                                                    | 2015 |
| Effect of isolated vitamin D supplementation on bone turnover markers in younger postmenopausal women: a randomized, double-blind, placebo-controlled trial                                                                                                                                              | Nahas-Neto, , J, Cangussu, LM, Orsatti, CL, Bueloni-Dias, FN, Poloni, PF, Schmitt, EB; Nahas, EAP                                                                                                                                     | 2018 |
| Allogeneic mesenchymal precursor cells (MPCS): a novel approach to treating biologic refractory rheumatoid arthritis                                                                                                                                                                                     | Kafaja, , S, Segal, KR, Skerrett, D, Itescu, S; Furst, DE                                                                                                                                                                             | 2017 |
| An Open Label, Randomized Phase 2 Clinical Trial of Nivolumab investigating Efficacy and safety of Nivolumab given once prior to, concurrent to the radiotherapy (RT) and as maintenance therapy over 12 months in patients with advanced resectable HNSCC after surgery (NadiHN)                        | EUCTR2016-004787-20-DE                                                                                                                                                                                                                | 2017 |
| FLT3 ligand concentrations are elevated in anca-associated vasculitides (AAV) and are influenced by immunosuppressive therapy                                                                                                                                                                            | Venhoff, , N, Thiel, J, Voll, RE, Venhoff, AC; Salzer, U                                                                                                                                                                              | 2017 |
| Linear growth and anthropometric and nutritional measurements in children with mild to moderate renal insufficiency: a report of the Growth Failure in Children with Renal Diseases Study                                                                                                                | Abitbol, , CL, Warady, BA, Massie, MD, Baluarte, HJ, Fleischman, LE, Geary, DF, Kaiser, BA, McEnery, PT; Chan, JC                                                                                                                     | 1990 |
| Detection of circulating tumor cells using manually performed immunocytochemistry (MICC) does not correlate with outcome in patients with early breast cancer - Results of the German SUCCESS-A-trial                                                                                                    | Jueckstock, , J, Rack, B, Friedl, TWP, Scholz, C, Steidl, J, Trapp, E, Tesch, H, Forstbauer, H, Lorenz, R, Rezai, M, Haberle, L, Alunni-Fabbroni, M, Schneeweiss, A, Beckmann, MW, Lichtenegger, W, Fasching, PA, Pantel, K; Janni, W | 2016 |
| Serum collagen crosslinks as markers of bone turn-over during GH replacement therapy in growth hormone deficient adults                                                                                                                                                                                  | Rodríguez-Arnao, , J, James, I, Jabbar, A, Trainer, PJ, Perrett, D, Besser, GM; Ross, RJ                                                                                                                                              | 1998 |
| The effect of 1-year transdermal estrogen replacement therapy on bone mineral density and biochemical markers of bone turnover in osteopenic postmenopausal systemic lupus erythematosus patients: a randomized, double-blind, placebo-controlled trial                                                  | Bhattoa, , HP, Bettembuk, P, Balogh, A, Szegedi, G; Kiss, E                                                                                                                                                                           | 2004 |
| A study to test the effect of a new treatment designed to improve the outcome of periodontal surgery                                                                                                                                                                                                     | ISRCTN31193447                                                                                                                                                                                                                        | 2014 |
| Widespread increase in myeloid calcifying cells contributes to ectopic vascular calcification in type 2 diabetes                                                                                                                                                                                         | Fadini, , GP, Albiero, M, Menegazzo, L, Boscaro, E, Vigili de Kreutzenberg, S, Agostini, C, Cabrelle, A, Binotto, G, Rattazzi, M,                                                                                                     | 2011 |

|                                                                                                                                                                                                                                                                                                                    |                                                                                                                                                                                                                                                                                                      |      |
|--------------------------------------------------------------------------------------------------------------------------------------------------------------------------------------------------------------------------------------------------------------------------------------------------------------------|------------------------------------------------------------------------------------------------------------------------------------------------------------------------------------------------------------------------------------------------------------------------------------------------------|------|
|                                                                                                                                                                                                                                                                                                                    | Bertacco, E, Bertorelle, R, Biasini, L, Mion, M, Plebani, M, Ceolotto, G, Angelini, A, Castellani, C, Menegolo, M, Grego, F, Dimmeler, S, Seeger, F, Zeiher, A, Tiengo, A; Avogaro, A                                                                                                                |      |
| Comparison of the effect of doxycycline with Omega-3 fatty acid and low-dose Aspirin on gingival crevicular fluid levels of matrix metalloproteinase-8                                                                                                                                                             | IRCT2013052311771N6                                                                                                                                                                                                                                                                                  | 2013 |
| Randomized placebo-controlled trial of risedronate in patients with crohn's disease and osteopenia                                                                                                                                                                                                                 | Pierik, , M, Hommes, DW, Dijkstra, G, Van Hogezaand, RA, Lips, P, Russel, M, Van Bodegraven, AA, Van Der Woude, CJ, Van De Langerijt, L, Stokkers, P, Peeters, GME, Oldenburg, B; Netelenbos, CJC                                                                                                    | 2010 |
| Investigating relationships between IL-17, Th17 pathway activation and therapeutic response to TNF inhibition in rheumatoid arthritis patients                                                                                                                                                                     | ISRCTN18262002                                                                                                                                                                                                                                                                                       | 2015 |
| Phase II and coagulation cascade biomarker study of bevacizumab with or without docetaxel in patients with previously treated metastatic pancreatic adenocarcinoma                                                                                                                                                 | Astsaturon, , IA, Meropol, NJ, Alpaugh, RK, Burtness, BA, Cheng, JD, McLaughlin, S, Rogatko, A, Xu, Z, Watson, JC, Weiner, LM; Cohen, SJ                                                                                                                                                             | 2011 |
| Effects of a Cyclic NSAID Regimen on Levels of Prostaglandin-E2 and Interleukin-1beta in Gingival Crevicular Fluid of Subjects with Periodontitis: a Randomised Clinical Trial                                                                                                                                     | TCTR20160202001                                                                                                                                                                                                                                                                                      | 2016 |
| Phase I, pharmacokinetic, and biological studies of TSU-68, a novel multiple receptor tyrosine kinase inhibitor, administered after meals with solid tumors                                                                                                                                                        | Murakami, , H, Ueda, Y, Shimoyama, T, Yamamoto, N, Yamada, Y, Arioka, H; Tamura, T                                                                                                                                                                                                                   | 2011 |
| A Phase 3 study to see the benefit and safety of Luspatercept in comparison with Epoetin Alfa to treat anaemia due to very low, low or intermediate risk Myelodysplastic Syndromes (MDS) in people who have not taken erythropoiesis-stimulating agents (ESA's) before and who require red blood cell transfusions | EUCTR2017-003190-34-LT                                                                                                                                                                                                                                                                               | 2018 |
| TNT009 prevents erythrocyte c3 fragment opsonization and rescues reticulocytes from destruction in patients with cold agglutinin disease                                                                                                                                                                           | Panicker, , S, Drucker, C, Hussain, S, Parry, GC, Gilbert, JC, Jilma, B; Jaeger, U                                                                                                                                                                                                                   | 2016 |
| Effectiveness of chronic treatment with alendronate in the osteoporosis of Cushing's disease                                                                                                                                                                                                                       | Di Somma, , C, Colao, A, Pivonello, R, Klain, M, Faggiano, A, Tripodi, FS, Merola, B, Salvatore, M; Lombardi, G                                                                                                                                                                                      | 1998 |
| BGB324, an orally available selective Axl inhibitor exerts anti-leukemic activity in the first-in-patient trial BGBC003 and induces unique changes in biomarker profiles                                                                                                                                           | Sonja, , L, Gjertsen, BT, Heuser, M, Chromik, J, Batalla, IB, Akyuz, N, Micklem, D, Brown, A, Lorens, J, Kebenko, M, Janning, M, Binder, M, Fiedler, W; Cortes, JE                                                                                                                                   | 2016 |
| Clonal evolution revealed by exome sequencing in a case of primary myelofibrosis associated with subsequent development of aggressive systemic mastocytosis/mast cell leukemia                                                                                                                                     | Oh, , ST, Miller, CA, Gindin, Y, Brost, TM, Chan, J, Fulbright, MC, Fisher, DAC, Duncavage, EJ, O'Laughlin, M, Griffith, M, Griffith, OL; Wartman, LD                                                                                                                                                | 2016 |
| Dental Pain 4                                                                                                                                                                                                                                                                                                      | EUCTR2012-002996-32-GB                                                                                                                                                                                                                                                                               | 2012 |
| B-cell maturation antigen (BCMA)-specific chimeric antigen receptor T cells (CART-BCMA) for Multiple Myeloma (MM): initial safety and efficacy from a phase i study                                                                                                                                                | Cohen, , AD, Garfall, AL, Stadtmauer, EA, Lacey, SF, Lancaster, E, Vogl, DT, Dengel, K, Ambrose, DE, Chen, F, Plesa, G, Kulikovskaya, I, Gonzalez, VE, Gupta, M, Young, RM, Carey, T, Ferthio, R, Weiss, BM, Richardson, C, Isaacs, RE, Melenhorst, JJ, Levine, BL, June, CH; Milone, MC             | 2016 |
| Human dental pulp stem cells (hDPSCs) as treatment for periodontal disease                                                                                                                                                                                                                                         | ISRCTN12831118                                                                                                                                                                                                                                                                                       | 2016 |
| Determination of IDH1 mutational burden and clearance via next-generation sequencing in patients with IDH1 mutation-positive hematologic malignancies receiving AG-120, a first-in-class inhibitor of mutant IDH1                                                                                                  | DiNardo, , CD, De Botton, S, Stein, EM, Roboz, GJ, Swords, RT, Pollyea, DA, Fathi, AT, Collins, R, Altman, JK, Flinn, IW, Mannis, GN, Mims, AS, Foran, JM, Pigneux, A, Prince, GT, Uy, GL, Tallman, MS, Kantarjian, HM, Liu, H, Attar, EC, Sacolick, J, Yen, K, Hurov, JB, Choe, S, Wu, B; Stone, RM | 2016 |
| Effect of photodynamic therapy on inflammatory biomarkers and clinical parameters in moderate to severe chronic periodontitis                                                                                                                                                                                      | IRCT2012121611770N1                                                                                                                                                                                                                                                                                  | 2013 |
| Interim results from a phase 1/2 clinical study of lentiglobin gene therapy for severe sickle cell disease                                                                                                                                                                                                         | Kanter, , J, Walters, MC, Hsieh, MM, Krishnamurti, L, Kwiatkowski, J, Kamble, RT, Von Kalle, C, Kuypers, FA, Cavazzana, M, Leboulch, P, Joseney-Antoine, M, Asmal, M, Thompson, AA; Tisdale, JF                                                                                                      | 2016 |
| Preliminary safety and clinical activity in a phase 1 study of Blu- 285, a potent, highly-selective inhibitor of KIT D816V in advanced systemic mastocytosis (SM)                                                                                                                                                  | Drummond, , MW, DeAngelo, DJ, Deininger, MW, Radia, D, Quiery, AT, Hexner, EO, Shi, H, Alvarez-Diez, T, Evans, EK, Healy, ME, Wolf, BB; Verstovsek, S                                                                                                                                                | 2016 |
| TCA cycle inhibition by CPI-613 increases sensitivity to chemotherapy in older and poor risk acute myeloid leukemia (AML)                                                                                                                                                                                          | Pardee, , TS, Miller, LD, Pladna, K, Isom, S, Ellis, LR, Berenzon, D, Howard, D, Manuel, M, Dralle, S, Lyerly, S; Powell, BL                                                                                                                                                                         | 2016 |
| A clinical study of OPN -305, a toll-like receptor 2 (TLR-2) antibody, in patients with lower risk myelodysplastic syndromes (MDS) that have received prior hypomethylating agent (HMA) therapy                                                                                                                    | Garcia-Manero, , G, Montalban-Bravo, G, Yang, H, Wei, Y, Alvarado, Y, DiNardo, CD, Daver, NG, Konopleva, M, Hearn, KP, Miller, R, Arbe-Barnes, S, Mc Guirk, P, Kearney, T, Keogh, B, Kantarjian, HM; Reilly, M                                                                                       | 2016 |
| Non-surgical periodontal therapy improves serum levels of C-reactive protein and edematous states in female patients with idiopathic edema                                                                                                                                                                         | Joseph, , R, Narayan, V, Krishnan, R; Melemdathil, S                                                                                                                                                                                                                                                 | 2011 |
| High-dose chemotherapy and peripheral blood stem cell infusion in patients with non-Hodgkin's lymphoma: results of outpatient treatment in community cancer centers                                                                                                                                                | Weaver, , CH, Schwartzberg, L, Zhen, B, Mangum, M, Leff, R, Tauer, K, Rosenberg, A, Pendergrass, K, Kaywin, P, Hainsworth, J, Greco, FA, West, WH; Buckner, CD                                                                                                                                       | 1997 |
| The Effect of Ischemic Preconditioning on Postoperative Pain After Total Knee Arthroplasty, a Randomized, Controlled Trial                                                                                                                                                                                         | NCT01333969                                                                                                                                                                                                                                                                                          | 2011 |
| Dose-effect relations of loop- and thiazide-diuretics on calcium homeostasis: a randomized, double-blinded Latin-square multiple cross-over study in postmenopausal osteopenic women                                                                                                                               | Rejnmark, , L, Vestergaard, P, Pedersen, AR, Heickendorff, L, Andreasen, F; Mosekilde, L                                                                                                                                                                                                             | 2003 |
| Effects of changing strategies of fracture fixation on immunologic changes and systemic complications after multiple trauma: damage control orthopedic surgery                                                                                                                                                     | Pape, H-C                                                                                                                                                                                                                                                                                            | 2008 |

|                                                                                                                                                                                                                        |                                                                                                                                                                                                                                                      |      |
|------------------------------------------------------------------------------------------------------------------------------------------------------------------------------------------------------------------------|------------------------------------------------------------------------------------------------------------------------------------------------------------------------------------------------------------------------------------------------------|------|
| Matrix metalloproteinases and the activity of their tissue inhibitors in patients with ST-elevation myocardial infarction treated with primary angioplasty                                                             | Kuliczkowski, W, Urbaniak, J, Hallén, J, Woźniak, M, Poloński, L, Mysiak, A, Atar, D, Zembala, M; Serebruany, V                                                                                                                                      | 2013 |
| Short-term clinical and immunologic effects of scaling and root planing with Er: YAG laser in chronic periodontitis                                                                                                    | Lopes, BM, Marcantonio, RA, Thompson, GM, Neves, LH; Theodoro, LH                                                                                                                                                                                    | 2008 |
| Calcifediol: perspectives for clinical applications in 2017-control of mineral metabolism: the addid study                                                                                                             | Minisola, S, Cianferotti, L, Biondi, P, Pepe, J, Cipriani, C, Fossi, C, Giusti, F, Franceschelli, F, Leoncini, G; Brandi, ML                                                                                                                         | 2017 |
| Effect of $\beta$ -cryptoxanthin ( $\beta$ -Cx), Plant Sterols and Galactooligosaccharides on Systemic and Gastrointestinal Markers                                                                                    | NCT03469518                                                                                                                                                                                                                                          | 2018 |
| FUTURE-2: results from an open-label, long-term safety and tolerability extension study using the pediatric FormUlation of bosenTan in pUlmonary arterial hyperTension                                                 | Berger, RM, Haworth, SG, Bonnet, D, Dulac, Y, Fraisse, A, Galiè, N, Ivy, DD, Jaïs, X, Miera, O, Rosenzweig, EB, Efficace, M, Kusic-Pajic, A; Beghetti, M                                                                                             | 2016 |
| Adjuvant spleen ultrafiltrate immunotherapy in unresectable advanced non small cell lung cancer                                                                                                                        | Tomeczko, J, Napora, P, Dlubek, D, Pacuszek, T, Bochenska, J, Teucher, T, Schmitz, H; Lange, A                                                                                                                                                       | 1997 |
| Effects of erythropoietin on mobilisation of haemopoietic progenitor cells                                                                                                                                             | Pettengell, R, Woll, PJ, Chang, J, Coutinho, L, Testa, NG; Crowther, D                                                                                                                                                                               | 1994 |
| A phase 3 randomized controlled trial of the efficacy and safety of atrasentan in men with metastatic hormone-refractory prostate cancer                                                                               | Carducci, MA, Saad, F, Abrahamsson, PA, Dearnaley, DP, Schulman, CC, North, SA, Sleep, DJ, Isaacson, JD; Nelson, JB                                                                                                                                  | 2007 |
| Combination of granulocyte colony-stimulating factor and erythropoietin improves outcomes of patients with decompensated cirrhosis                                                                                     | Kedarisetty, CK, Anand, L, Bhardwaj, A, Bhadoria, AS, Kumar, G, Vyas, AK, David, P, Trehanpati, N, Rastogi, A, Bihari, C, Maiwall, R, Garg, HK, Vashishtha, C, Kumar, M, Bhatia, V; Sarin, SK                                                        | 2015 |
| Nivolumab combined with ibrutinib for CLL and richter transformation: a phase II trial                                                                                                                                 | Jain, N, Basu, S, Thompson, PA, Ohanian, M, Ferrajoli, A, Pemmaraju, N, Cortes, JE, Estrov, Z, Burger, JA, Neelapu, SS, Lopez, W, Thakral, B, Bueso-Ramos, CE, Blando, J, O'Brien, SM, Kantarjian, HM, Allison, J, Keating, M, Sharma, P; Wierda, WG | 2016 |
| Omega 3 fatty acids as a host modulator in chronic periodontitis patients: a randomised, double-blind, placebo-controlled, clinical trial                                                                              |                                                                                                                                                                                                                                                      | 2014 |
| Efficacy of honey in healing diabetic ulcers - a pilot study                                                                                                                                                           | Ullal, S; Adhikari, P                                                                                                                                                                                                                                | 2014 |
| Effect of intensive atorvastatin therapy on prostaglandin E2 levels and metalloproteinase-9 activity in the plasma of patients with non-ST-elevation acute coronary syndrome                                           | Gómez-Hernández, A, Sánchez-Galán, E, Ortego, M, Martín-Ventura, JL, Blanco-Colio, LM, Tarín-Vicente, N, Jiménez-Nacher, JJ, López-Bescos, L, Egido, J; Tuñón, J                                                                                     | 2008 |
| Impact of mild or moderate renal insufficiency on the intravascular ultrasonic analysis of chronic vascular response to paclitaxel-eluting and bare-metal stents (from the TAXUS IV, V, and VI trials)                 | Aoki, J, Mintz, GS, Weissman, NJ, Mandinoff, L, Grube, E, Dawkins, KD, Ellis, SG, Greenberg, J, Yu, A, Mann, JT, Cannon, L, Cambier, PA; Stone, GW                                                                                                   | 2008 |
| Metabolic syndrome and breast cancer: effects of a 16-week combined exercise intervention                                                                                                                              | Dieli-Conwright, CM, Tripathy, D, Schroeder, ET, Mortimer, JE; Bernstein, L                                                                                                                                                                          | 2013 |
| The assessment of prognostic factors in surgical treatment of low-grade gliomas: a prospective study                                                                                                                   | Majchrzak, K, Kaspera, W, Bobek-Billewicz, B, Hebda, A, Stasik-Pres, G, Majchrzak, H; Ladzinski, P                                                                                                                                                   | 2012 |
| ATG induction therapy: long-term effects on Th1 but not on Th2 responses                                                                                                                                               | Weimer, R, Staak, A, Süsal, C, Steller, S, Yildiz, S, Pelzl, S, Renner, F, Dietrich, H, Daniel, V, Rainer, L, Kamali-Ernst, S, Ernst, W, Padberg, W; Opelz, G                                                                                        | 2005 |
| Thalidomide versus active supportive care for maintenance in patients with malignant mesothelioma after first-line chemotherapy (NVALT 5): an open-label, multicentre, randomised phase 3 study                        | Buikhuisen, WA, Burgers, JA, Vincent, AD, Korse, CM, van Klaveren, RJ, Schramel, FM, Pavlakis, N, Nowak, AK, Custers, FL, Schouwink, JH, Gans, SJ, Groen, HJ, Strankinga, WF; Baas, P                                                                | 2013 |
| Free DKK-1 serum levels are unchanged in spondyloarthritis patients treated by anti-TNF-data from the sparse study                                                                                                     | Miceli-Richard, C, Combe, B, Berenbaum, F, Schaevebeke, T, Koppiker, N, Logeart, I, Dubanchet, A; Dougados, M                                                                                                                                        | 2016 |
| The dose-related effects of dexmedetomidine on renal functions and serum neutrophil gelatinase-associated lipocalin values after coronary artery bypass grafting: a randomized, triple-blind, placebo-controlled study | Balkanay, OO, Goksedef, D, Omeroglu, SN; Ipek, G                                                                                                                                                                                                     | 2015 |
| The Influence of Food Matrix Delivery System on the Bioavailability of Vitamin D3                                                                                                                                      | NCT03783273                                                                                                                                                                                                                                          | 2018 |
| Phase I trial of a melanoma vaccine with gp100(280-288) peptide and tetanus helper peptide in adjuvant: immunologic and clinical outcomes                                                                              | Slingluff, CL, Yamshchikov, G, Neese, P, Galavotti, H, Eastham, S, Engelhard, VH, Kittleson, D, Deacon, D, Hibbitts, S, Grosh, WW, Petroni, G, Cohen, R, Wiernasz, C, Patterson, JW, Conway, BP; Ross, WG                                            | 2001 |
| Immunomodulatory effects of high-dose and low-dose interferon alpha2b in patients with high-risk resected melanoma: the E2690 laboratory corollary of intergroup adjuvant trial E1690                                  | Kirkwood, JM, Richards, T, Zarour, HM, Sosman, J, Ernstoff, M, Whiteside, TL, Ibrahim, J, Blum, R, Wicand, S; Mascari, R                                                                                                                             | 2002 |
| Resection of hepatocellular carcinoma in elderly patients and the role of energy balance                                                                                                                               | Cannistra, M, Grande, R, Ruggiero, M, Novello, M, Zullo, A, Bonaiuto, E, Vaccarisi, S, Cavallari, G, Serra, R; Nardo, B                                                                                                                              | 2016 |
| Exposure-Response and Tumor Growth Inhibition Analyses of the Monovalent Anti-c-MET Antibody Onartuzumab (MetMab) in the Second- and Third-Line Non-Small Cell Lung Cancer                                             | Han, K, Chanu, P, Jonsson, F, Winter, H, Bruno, R, Jin, J; Stroh, M                                                                                                                                                                                  | 2017 |
| Initial Experience with Covered Endovascular Reconstruction of the Aortic Bifurcation in Conjunction with Chimney Grafts                                                                                               | Dijkstra, ML, Goverde, PCJM, Holden, A, Zeebregts, CJ; Reijnen, MMPJ                                                                                                                                                                                 | 2017 |
| Minimised closed circuit coronary artery bypass grafting in the elderly is associated with lower levels of rgan-specific biomarkers: a prospective randomised study                                                    | Van Boven, W-JP, Gerritsen, WB, Driessen, AH, Van Dongen, EP, Klautz, RJ; Aarts, LP                                                                                                                                                                  | 2013 |
| Combination of hemofiltration and peritoneal dialysis in the treatment of severe acute pancreatitis                                                                                                                    | Feng, GH, Cai, Y, Jia, PH, Yang, QJ, Jia, Z, Zhang, J; Zhang, XP                                                                                                                                                                                     | 2004 |
| Influence of a probiotic mixture on antibiotic induced microbiota disturbances                                                                                                                                         | Forssten, S, Evans, M, Wilson, D; Ouwehand, AC                                                                                                                                                                                                       | 2014 |
| A combination treatment of prednisone, aspirin, folate, and progesterone in women with idiopathic recurrent miscarriage: a matched-pair study                                                                          | Tempfer, CB, Kurz, C, Bentz, EK, Unfried, G, Walch, K, Czizek, U; Huber, JC                                                                                                                                                                          | 2006 |



|                                                                                                                                                                                    |                                                                                                                                                                                                                                                                                                                                                                                          |      |
|------------------------------------------------------------------------------------------------------------------------------------------------------------------------------------|------------------------------------------------------------------------------------------------------------------------------------------------------------------------------------------------------------------------------------------------------------------------------------------------------------------------------------------------------------------------------------------|------|
| CD4+FOXP3+ regulatory T cell depletion by low-dose cyclophosphamide prevents recurrence in patients with large condylomata acuminata after laser therapy                           | Cao, , Y, Zhao, J, Yang, Z, Cai, Z, Zhang, B, Zhou, Y, Shen, GX, Chen, X, Li, S; Huang, B                                                                                                                                                                                                                                                                                                | 2010 |
| Common beans and cowpeas as complementary foods to reduce environmental enteric dysfunction and stunting in Malawian children: study protocol for two randomized controlled trials | Trehan, , I, Benzoni, NS, Wang, AZ, Bollinger, LB, Ngoma, TN, Chimimba, UK, Stephenson, KB, Agapova, SE, Maleta, KM; Manary, MJ                                                                                                                                                                                                                                                          | 2015 |
| Efficacy and safety of ustekinumab in patients with active psoriatic arthritis: 1 year results of the phase 3, multicentre, double-blind, placebo-controlled PSUMMIT 1 trial       | McInnes, , IB, Kavanaugh, A, Gottlieb, AB, Puig, L, Rahman, P, Ritchlin, C, Brodmerkel, C, Li, S, Wang, Y, Mendelsohn, AM; Doyle, MK                                                                                                                                                                                                                                                     | 2013 |
| Skincare and synbiotics for the prevention of atopic dermatitis or food allergy in newborn infants: a 2 × 2 factorial randomized non-treatment controlled trial                    | Dissanayake, , E, Tani, Y, Sahara, M, Mitsuishi, C, Nagai, K, Sato, Y, Suzuki, Y, Nakano, T, Yamaide, F; Shimojo, N                                                                                                                                                                                                                                                                      | 2018 |
| Adjuvant immunotherapy with autologous cytokine-induced killer cells for hepatocellular carcinoma                                                                                  | Lee, , JH, Lee, JH, Lim, YS, Yeon, JE, Song, TJ, Yu, SJ, Gwak, GY, Kim, KM, Kim, YJ, Lee, JW; Yoon, JH                                                                                                                                                                                                                                                                                   | 2015 |
| Cerebral protective effect of nicorandil premedication on patients undergoing liver transplantation                                                                                | Xia, , YF, Wang, ZP, Zhou, YC, Yan, T; Li, ST                                                                                                                                                                                                                                                                                                                                            | 2012 |
| pCMV-vegf165 Intramuscular Gene Transfer is an Effective Method of Treatment for Patients With Chronic Lower Limb Ischemia                                                         | Deev, , RV, Bozo, IY, Mzhavanadze, ND, Voronov, DA, Gavrilenko, AV, Chervyakov, YV, Staroverov, IN, Kalinin, RE, Shvalb, PG; Isaev, AA                                                                                                                                                                                                                                                   | 2015 |
| 1-Year Results of a Multicenter Randomized Controlled Trial Comparing Heparin-Bonded Endoluminal to Femoropopliteal Bypass                                                         | Reijnen, , MMPJ, van Walraven, LA, Fritschy, WM, Lensvelt, MMA, Zeebregts, CJ, Lemson, MS, Wikkeling, ORM, Smeets, L; Holewijn, S                                                                                                                                                                                                                                                        | 2017 |
| Therapy with autologous adipose-derived regenerative cells for the care of chronic ulcer of lower limbs in patients with peripheral arterial disease                               | Marino, , G, Moraci, M, Armenia, E, Orabona, C, Sergio, R, De Sena, G, Capuozzo, V, Barbarisi, M, Rosso, F, Giordano, G, Iovino, F; Barbarisi, A                                                                                                                                                                                                                                         | 2013 |
| Trichuris suis ova in relapsing-remitting multiple sclerosis and clinically isolated syndrome (TRIOMS): study protocol for a randomized controlled trial                           | Rosche, , B, Wernecke, KD, Ohlraun, S, Dörr, JM; Paul, F                                                                                                                                                                                                                                                                                                                                 | 2013 |
| Abatacept in children with juvenile idiopathic arthritis: a randomised, double-blind, placebo-controlled withdrawal trial                                                          | Ruperto, , N, Lovell, DJ, Quartier, P, Paz, E, Rubio-Pérez, N, Silva, CA, Abud-Mendoza, C, Burgos-Vargas, R, Gerloni, V, Melo-Gomes, JA, Saad-Magalhães, C, Sztajn bok, F, Goldenstein-Schainberg, C, Scheinberg, M, Penades, IC, Fischbach, M, Orozco, J, Hashkes, PJ, Hom, C, Jung, L, Lepore, L, Oliveira, S, Wallace, CA, Sigal, LH, Block, AJ, Covucci, A, Martini, A; Giannini, EH | 2008 |
| Results of the swiss epo neuroprotection trial in very preterm infants                                                                                                             | Fauchere, , J-C, Leuchter, RH, Natalucci, G, Dame, C, Koller, BM, Ruegger, CM, Hagmann, C, Huppi, PS; Bucher, HU                                                                                                                                                                                                                                                                         | 2015 |
| Pulsed oral sirolimus in advanced autosomal-dominant polycystic kidney disease (Vienna RAP Study): study protocol for a randomized controlled trial                                | Riegersperger, , M, Herkner, H; Sunder-Plassmann, G                                                                                                                                                                                                                                                                                                                                      | 2015 |
| Angiogenesis - A new goal in peripheral artery occlusive disease therapy                                                                                                           | Makinen, K                                                                                                                                                                                                                                                                                                                                                                               | 2003 |
| Neutrophil transfusions in the treatment of neutropenic patients submitted to allogeneic HSCT: possible role on graft failure                                                      | Giammarco, , S, Chiusolo, P, Laurenti, L, Sor, F, Piccirillo, N, Teofili, L; Sica, S                                                                                                                                                                                                                                                                                                     | 2017 |
| Improvement in disability after alemtuzumab treatment of multiple sclerosis is associated with neuroprotective autoimmunity                                                        | Jones, , JL, Anderson, JM, Phuah, CL, Fox, EJ, Selmaj, K, Margolin, D, Lake, SL, Palmer, J, Thompson, SJ, Wilkins, A, Webber, DJ, Compston, DA; Coles, AJ                                                                                                                                                                                                                                | 2010 |
| Bovine colostrum as a modulator of immune system in allergic children                                                                                                              | Snejdarova, , I, Hrbkova, M, Votruba, M; Snejdarova, V                                                                                                                                                                                                                                                                                                                                   | 2001 |
| A phase II, randomized, multicenter study evaluating the combination of lapatinib and vinorelbine in women with ErbB2 overexpressing metastatic breast cancer                      | Janni, , W, Sarosiek, T, Karaszewska, B, Pikiel, J, Staroslawska, E, Potemski, P, Salat, C, Brain, E, Caglevic, C, Briggs, K, Desilvio, M, Marini, L; Papadimitriou, C                                                                                                                                                                                                                   | 2014 |
| Gestational diabetes and pregnancy morbidity and outcome                                                                                                                           | Bratila, , E, Comandasu, DE, Iacob, G, Teodorescu, C, Cirstoiu, M, Bohltea, R, Berceanu, C; Mehedintu, C                                                                                                                                                                                                                                                                                 | 2016 |
| Latent classes of nonresponders, rapid responders, and gradual responders in depressed outpatients receiving antidepressant medication and psychotherapy                           | Thibodeau, , MA, Quilty, LC, De Fruyt, F, De Bolle, M, Rouillon, F; Bagby, RM                                                                                                                                                                                                                                                                                                            | 2015 |
| Moxifloxacin as an adjunctive antibiotic in the treatment of severe chronic periodontitis                                                                                          | Guentsch, , A, Jentsch, H, Pfister, W, Hoffmann, T; Eick, S                                                                                                                                                                                                                                                                                                                              | 2008 |
| Macular atrophy progression and 7-year vision outcomes in subjects from the ANCHOR, MARINA, and HORIZON studies: the SEVEN-UP study                                                | Bhisitkul, , RB, Mendes, TS, Rofagha, S, Enanoria, W, Boyer, DS, Sadda, SR; Zhang, K                                                                                                                                                                                                                                                                                                     | 2015 |
| Reducing polycystic liver volume in ADPKD: effects of somatostatin analogue octreotide                                                                                             | Caroli, , A, Antiga, L, Cafaro, M, Fasolini, G, Remuzzi, A, Remuzzi, G; Ruggerenti, P                                                                                                                                                                                                                                                                                                    | 2010 |
| Chemically modified tetracyclines an emerging host modulator in chronic periodontitis patients: a randomized, double-blind, placebo-controlled, clinical trial                     | Alyousef, , AA, Divakar, DD; Muzaheed, null                                                                                                                                                                                                                                                                                                                                              | 2017 |
| Zinc supplementation in the management of shigellosis in malnourished children in Bangladesh                                                                                       | Roy, , SK, Raqib, R, Khatun, W, Azim, T, Chowdhury, R, Fuchs, GJ; Sack, DA                                                                                                                                                                                                                                                                                                               | 2008 |
| A randomized clinical trial of bifocal glasses for myopic children with esophoria: results after 54 months                                                                         | Fulk, , GW, Cyert, LA; Parker, DE                                                                                                                                                                                                                                                                                                                                                        | 2002 |
| Comparison Between Two Different Antibiotic Regimens for the Placement of Dental Implants                                                                                          | NCT01851681                                                                                                                                                                                                                                                                                                                                                                              | 2013 |
| The skeletal consequences of growth hormone therapy in dialyzed children: a randomized trial                                                                                       | Bacchetta, , J, Wesseling-Perry, K, Kuizon, B, Pereira, RC, Gales, B, Wang, HJ, Elashoff, R; Salusky, IB                                                                                                                                                                                                                                                                                 | 2013 |
| Regional angiogenesis with vascular endothelial growth factor in peripheral arterial disease: a phase II randomized, double-blind,                                                 | Rajagopalan, , S, Mohler, ER, Lederman, RJ, Mendelsohn, FO, Saucedo, JF, Goldman, CK, Blebea, J, Macko, J, Kessler, PD, Rasmussen, HS; Annex, BH                                                                                                                                                                                                                                         | 2003 |

|                                                                                                                                                                                                                                                                                |                                                                                                                                                                                                                                                          |      |
|--------------------------------------------------------------------------------------------------------------------------------------------------------------------------------------------------------------------------------------------------------------------------------|----------------------------------------------------------------------------------------------------------------------------------------------------------------------------------------------------------------------------------------------------------|------|
| controlled study of adenoviral delivery of vascular endothelial growth factor 121 in patients with disabling intermittent claudication                                                                                                                                         |                                                                                                                                                                                                                                                          |      |
| The GoodNEWS (Genes, Nutrition, Exercise, Wellness, and Spiritual Growth) Trial: a community-based participatory research (CBPR) trial with African-American church congregations for reducing cardiovascular disease risk factors—recruitment, measurement, and randomization | DeHaven, , MJ, Ramos-Roman, MA, Gimpel, N, Carson, J, DeLemos, J, Pickens, S, Simmons, C, Powell-Wiley, T, Banks-Richard, K, Shuval, K, Duvahl, J, Duval, J, Tong, L, Hsieh, N; Lee, JJ                                                                  | 2011 |
| Outcomes after multiple courses of granulocyte colony-stimulating factor and growth hormone in decompensated cirrhosis: a randomized trial                                                                                                                                     | Verma, , N, Kaur, A, Sharma, R, Bhalla, A, Sharma, N, De, A; Singh, V                                                                                                                                                                                    | 2018 |
| A randomized, double-blind, phase II study of ramucirumab plus docetaxel vs placebo plus docetaxel in Japanese patients with stage IV non-small cell lung cancer after disease progression on platinum-based therapy                                                           | Yoh, , K, Hosomi, Y, Kasahara, K, Yamada, K, Takahashi, T, Yamamoto, N, Nishio, M, Ohe, Y, Koue, T, Nakamura, T, Enatsu, S, Lee, P, Ferry, D, Tamura, T; Nakagawa, K                                                                                     | 2016 |
| Standard medical therapies do not alter colonic transit time in children with treatment-resistant slow-transit constipation                                                                                                                                                    | Clarke, , MCC, Chase, JW, Gibb, S, Catto-Smith, AG, Hutson, JM; Southwell, BR                                                                                                                                                                            | 2009 |
| A phase II study of aflibercept in patients with advanced epithelial ovarian cancer and symptomatic malignant ascites                                                                                                                                                          | Colombo, , N, Mangili, G, Mammoliti, S, Kalling, M, Tholander, B, Sternas, L, Buzenet, G; Chamberlain, D                                                                                                                                                 | 2012 |
| Extracorporeal Shock Wave Lithotripsy and Endotherapy for Pain in Chronic Pancreatitis                                                                                                                                                                                         | NCT03966781                                                                                                                                                                                                                                              | 2019 |
| EULAR response criteria for polymyalgia rheumatica: results of an initiative of the European Collaborating Polymyalgia Rheumatica Group (subcommittee of ESCISIT)                                                                                                              | Leeb, , BF, Bird, HA, Nesher, G, Anel, I, Hueber, W, Logar, D, Montecucco, CM, Rovinsky, J, Sautner, J; Sonnenblick, M                                                                                                                                   | 2003 |
| Four-step high-dose sequential chemotherapy with hematopoietic progenitor-cell support as induction treatment for patients with solid tumors                                                                                                                                   | Culine, , S, Fabbro, M, Assens, C, Ychou, M, Romieu, G, Kramar, A, Cupissol, D, Pinguet, F; Pujol, H                                                                                                                                                     | 1997 |
| IL-1 $\beta$ as a New Early Predictive Biomarker for Non-Small Cell Lung Cancers Outcome                                                                                                                                                                                       | Missiroli, , S, Tamburini, N, Perrone, M, Maniscalco, P, Gafa, R, Lanza, G, Pinton, P, Cavallero, G; Giorgi, C                                                                                                                                           | 2018 |
| The Lake Victoria Island Intervention Study on Worms and Allergy-related diseases (LaVIISWA): study protocol for a randomised controlled trial                                                                                                                                 | Nampijja, , M, Webb, EL, Kaweesa, J, Kizindo, R, Namutebi, M, Nakazibwe, E, Oduru, G, Kabuubi, P, Kabagenyi, J, Kizito, D, Muhangi, L, Akello, M, Verweij, JJ, Nerima, B, Tukahebwa, E; Elliott, AM                                                      | 2015 |
| Efficacy and safety of individualized growth hormone treatment in adult Japanese patients with growth hormone deficiency                                                                                                                                                       | Chihara, , K, Kato, Y, Shimatsu, A, Tanaka, T; Kohno, H                                                                                                                                                                                                  | 2008 |
| Comparison of low-normal and high-normal IGF-1 target levels during growth hormone replacement therapy: a randomized clinical trial in adult growth hormone deficiency                                                                                                         | van Bunderen, , CC, Lips, P, Kramer, MH; Drent, ML                                                                                                                                                                                                       | 2016 |
| High-fibre diet and Lactobacillus paracasei B21060 in symptomatic uncomplicated diverticular disease                                                                                                                                                                           | Lahner, , E, Esposito, G, Zullo, A, Hassan, C, Cannaviello, C, Paolo, MC, Pallotta, L, Garbagna, N, Grossi, E; Annibale, B                                                                                                                               | 2012 |
| A disintegrin and metalloprotease-17 and galectin-9 are important regulators of local 4-1BB activity and disease outcome in rheumatoid arthritis                                                                                                                               | Nielsen, , MA, Andersen, T, Etzerodt, A, Kragstrup, TW, Rasmussen, TK, Stengaard-Pedersen, K, Hetland, ML, Hørslev-Petersen, K, Junker, P, Østergaard, M, Hvid, M, Moestrup, SK; Deleuran, B                                                             | 2016 |
| High-dose ifosfamide/carboplatin/etoposide: maximum tolerable doses, toxicities, and hematopoietic recovery after autologous stem cell reinfusion                                                                                                                              | Fields, , KK, Elfenbein, GJ, Perkins, JB, Janssen, WE, Ballester, OF, Hiemenz, JW, Zorsky, PE, Kronish, LE; Foody, MC                                                                                                                                    | 1994 |
| Add-Aspirin trial: a phase III, double blind, placebo-controlled, randomized trial assessing the effects of aspirin on disease recurrence and survival after primary therapy in common nonmetastatic solid tumors                                                              | Langley, , RE, Wilson, RH, Ring, AE, Kynaston, HG, Cameron, DA, Coyle, C, Gilbert, DC, Patrono, C, Rowley, S, Murphy, C, Adlam, D, Hubner, R, Iveson, T, Steele, RJ, Thomas, AL, Underwood, TJ, Jankowski, J, Gupta, S, Pramesh, CS; Parmar, M           | 2014 |
| Primary hormo-chemotherapy in metastatic prostate cancer                                                                                                                                                                                                                       | Janknegt, , RA; Boon, TA                                                                                                                                                                                                                                 | 1996 |
| Efficacy and safety of pegylated liposomal doxorubicin in combination with bortezomib for multiple myeloma: effects of adverse prognostic factors on outcome                                                                                                                   | Blade, , J, Sonneveld, P, San Miguel, JF, Sutherland, HJ, Hajek, R, Nagler, A, Spencer, A, Robak, T, Lantz, KC, Zhuang, SH, Harousseau, J-L; Orłowski, RZ                                                                                                | 2011 |
| Immunomodulator Intensification of Etioropic Therapy in Patients with Advanced Pulmonary Tuberculosis                                                                                                                                                                          | Kolomiets, , VM, Abramov, AV, Rachina, NV; Rubleva, NV                                                                                                                                                                                                   | 2015 |
| A randomized, placebo-controlled trial of IGF-1 for delayed graft function: a human model to study posts ischemic ARF                                                                                                                                                          | Hladunewich, , MA, Corrigan, G, Derby, GC, Ramaswamy, D, Kambham, N, Scandling, JD; Myers, BD                                                                                                                                                            | 2003 |
| The decision to extract: part II. Analysis of clinicians' stated reasons for extraction                                                                                                                                                                                        | Baumrind, , S, Korn, EL, Boyd, RL; Maxwell, R                                                                                                                                                                                                            | 1996 |
| Duration for apical barrier formation in necrotic immature permanent incisors treated with calcium hydroxide apexification using ultrasonic or hand filing                                                                                                                     | Lee, , LW, Hsiao, SH, Chang, CC; Chen, LK                                                                                                                                                                                                                | 2010 |
| Novel and targeted therapies for OA                                                                                                                                                                                                                                            | Lane, N                                                                                                                                                                                                                                                  | 2012 |
| Ciprofloxacin during upper respiratory tract infections to reduce Pseudomonas aeruginosa infection in paediatric cystic fibrosis: a pilot study                                                                                                                                | Connett, , GJ, Pike, KC, Legg, JP, Cathie, K, Dewar, A, Foote, K, Harris, A; Faust, SN                                                                                                                                                                   | 2015 |
| Clarithromycin Plus Intravenous Immunoglobulin Therapy Can Reduce the Relapse Rate of Kawasaki Disease: a Phase 2, Open-Label, Randomized Control Study                                                                                                                        | Nanishi, , E, Nishio, H, Takada, H, Yamamura, K, Fukazawa, M, Furuno, K, Mizuno, Y, Saigo, K, Kadoya, R, Ohbuchi, N, Onoe, Y, Yamashita, H, Nakayama, H, Hara, T, Ohno, T, Takahashi, Y, Hatae, K, Harada, T, Shimose, T, Kishimoto, J, Ohga, S; Hara, T | 2017 |
| The Design and Rationale of a Clinical Trial Evaluating Limb Postconditioning in Young Patients with Intracranial Arterial Stenosis                                                                                                                                            | Wei, , M, Huo, K, Liu, R, Yang, J, Cheng, Y, Chang, S, Ren, D; Luo, G                                                                                                                                                                                    | 2016 |
| Use of Oxandrolone to Promote Growth in Neonates following Surgery for Complex Congenital Heart Disease: an Open-Label Pilot Trial                                                                                                                                             | Burch, , PT, Spigarelli, MG, Lambert, LM, Loftus, PD, Sherwin, CM, Linakis, MW, Sheng, X, LuAnn Minich, L; Williams, RV                                                                                                                                  | 2016 |

|                                                                                                                                                                                                                                         |                                                                                                                                                                                                                                                                                                                         |      |
|-----------------------------------------------------------------------------------------------------------------------------------------------------------------------------------------------------------------------------------------|-------------------------------------------------------------------------------------------------------------------------------------------------------------------------------------------------------------------------------------------------------------------------------------------------------------------------|------|
| Anti-TNFα Use During Elective Foot and Ankle Surgery in Patients With Rheumatoid Arthritis                                                                                                                                              | NCT02242474                                                                                                                                                                                                                                                                                                             | 2014 |
| Primary transpupillary thermotherapy for small choroidal melanoma                                                                                                                                                                       | Chojniak, , MM, Chojniak, R, Nishimoto, IN, Allemann, N; Erwenne, CM                                                                                                                                                                                                                                                    | 2011 |
| General stress response to conventional and laparoscopic cholecystectomy                                                                                                                                                                | Glaser, , F, Sannwald, GA, Buhr, HJ, Kuntz, C, Mayer, H, Klee, F; Herfarth, C                                                                                                                                                                                                                                           | 1995 |
| Long-term Efficacy of Orthokeratology Contact Lens Wear in Controlling the Progression of Childhood Myopia                                                                                                                              | Santodomingo-Rubido, , J, Villa-Collar, C, Gilmartin, B, Gutiérrez-Ortega, R; Sugimoto, K                                                                                                                                                                                                                               | 2017 |
| Effects of YF476 and Rabepazole on Gastric Function                                                                                                                                                                                     | NCT01699113                                                                                                                                                                                                                                                                                                             | 2012 |
| Patients with metastatic renal cell carcinoma who benefit from axitinib dose titration: analysis from a randomised, double-blind phase II study                                                                                         | Tomita, , Y, Uemura, H, Oya, M, Shinohara, N, Habuchi, T, Fujii, Y, Kamei, Y, Umeyama, Y, Bair, AH; Rini, BI                                                                                                                                                                                                            | 2019 |
| Rationale and design of a prospective, randomised study of retrograde application of bone marrow aspirate concentrate (BMAC) through coronary sinus in patients with congestive heart failure of ischemic etiology (the RETRO study)    | Pleva, , L, Kukla, P, Vitkova, K; Prochazka, V                                                                                                                                                                                                                                                                          | 2019 |
| Assessment of prognostic and predictive properties of blood biomarkers in pivotal clinical studies of Pirfenidone'                                                                                                                      | Neighbors, , M, Cabanski, CR, DePianto, DJ, Ramalingam, TR, Tew, GW, Jia, G, Abbas, AR, Peng, K, Ray, J, Palme, S, Dziadek, S, Ritter, M, Kirchgassler, K, Ley, B, Wolters, PJ, Collard, HR; Arron, JR                                                                                                                  | 2016 |
| Alteration in angiogenic and anti-angiogenic forms of vascular endothelial growth factor-A in skeletal muscle of patients with intermittent claudication following exercise training                                                    | Jones, , WS, Duscha, BD, Robbins, JL, Duggan, NN, Regensteiner, JG, Kraus, WE, Hiatt, WR, Dokun, AO; Annex, BH                                                                                                                                                                                                          | 2012 |
| Management of adolescents with very poorly controlled type 1 diabetes by nurses: a parallel group randomized controlled trial                                                                                                           | Kassai, , B, Rabilloud, M, Bernoux, D, Michal, C, Riche, B, Ginhoux, T, Laudy, V, Terral, D, Didier-Wright, C, Maire, V, Dumont, C, Cottancin, G, Plasse, M, Jeannoel, GP, Khoury, J, Bony, C, Lièvre, M, Draï, J; Nicolino, M                                                                                          | 2015 |
| Quality-of-Life After Everolimus-Eluting Stents or Bypass Surgery for Left-Main Disease: results From the EXCEL Trial                                                                                                                   | Baron, , SJ, Chinnakondapalli, K, Magnuson, EA, Kandzari, DE, Puskas, JD, Ben-Yehuda, O, van Es, GA, Taggart, DP, Morice, MC, Lembo, NJ, Brown, WM, Banning, A, Simonton, CA, Kappetein, AP, Sabik, JF, Serruys, PW, Stone, GW; Cohen, DJ                                                                               | 2017 |
| High-dose fractionated total-body irradiation, etoposide and cyclophosphamide for treatment of malignant lymphoma: comparison of autologous bone marrow and peripheral blood stem cells                                                 | Brunvand, , MW, Bensinger, WI, Soll, E, Weaver, CH, Rowley, SD, Appelbaum, FR, Lilleby, K, Clift, RA, Gooley, TA, Press, OW, Fefer, A, Storb, R, Sanders, JE, Martin, PL, Chauncey, T, Maziarz, RT, Zuckerman, N, Montgomery, P, Dorn, R, Weiden, PL, Demire, T, Holmberg, LA, Schiffman, K, McSweeney, PA; Buckner, CD | 1996 |
| Risk factors and perinatal outcome in women with mid trimester urinary tract infection in pregnancy                                                                                                                                     | Ruman, , U, Rahman, MM; Khan, R                                                                                                                                                                                                                                                                                         | 2018 |
| Impact of neo-adjuvant Sorafenib treatment on liver transplantation in HCC patients - a prospective, randomized, double-blind, phase III trial                                                                                          | Hoffmann, , K, Ganten, T, Gotthardt, D, Radeleff, B, Settmacher, U, Kollmar, O, Nadalin, S, Karapanagiotou-Schenkel, I, von Kalle, C, Jäger, D, Büchler, MW; Schemmer, P                                                                                                                                                | 2015 |
| A phase II, randomized, blinded study of the farnesyltransferase inhibitor tipifarnib combined with letrozole in the treatment of advanced breast cancer after antiestrogen therapy                                                     | Johnston, , SR, Semiglazov, VF, Manikhas, GM, Spaeth, D, Romieu, G, Dodwell, DJ, Wardley, AM, Neven, P, Bessems, A, Park, YC, De Porre, PM, Perez Ruixo, JJ; Howes, AJ                                                                                                                                                  | 2008 |
| Serum phosphate modifies the vascular response to vitamin D receptor activation in chronic kidney disease (CKD) patients                                                                                                                | Zoccali, , C, Torino, C, Curatola, G, Panuccio, V, Tripepi, R, Pizzini, P, Versace, M, Bolignano, D, Cutrupi, S, Ghiadoni, L, Thadhani, R, Tripepi, G; Mallamaci, F                                                                                                                                                     | 2016 |
| Comparing the effect of sucrose gel and metronidazole gel in treatment of clinical symptoms of bacterial vaginosis: a randomized controlled trial                                                                                       | Khazaeian, , S, Navidian, A, Navabi-Rigi, SD, Araban, M, Mojab, F; Khazaeian, S                                                                                                                                                                                                                                         | 2018 |
| Effects of early intensive blood pressure-lowering treatment on the growth of hematoma and perihematomal edema in acute intracerebral hemorrhage: the Intensive Blood Pressure Reduction in Acute Cerebral Haemorrhage Trial (INTERACT) | Anderson, , CS, Huang, Y, Arima, H, Heeley, E, Skulina, C, Parsons, MW, Peng, B, Li, Q, Su, S, Tao, QL, Li, YC, Jiang, JD, Tai, LW, Zhang, JL, Xu, E, Cheng, Y, Morgenstern, LB, Chalmers, J; Wang, JG                                                                                                                  | 2010 |
| Effects of antiproteinuric intervention on elevated connective tissue growth factor (CTGF/CCN-2) plasma and urine levels in nondiabetic nephropathy                                                                                     | Slagman, , MC, Nguyen, TQ, Waanders, F, Vogt, L, Hemmelder, MH, Laverman, GD, Goldschmeding, R; Navis, G                                                                                                                                                                                                                | 2011 |
| Treatment of Active Crohn's Disease With an Ordinary Food-based Diet That Replicates Exclusive Enteral Nutrition                                                                                                                        | Svolos, , V, Hansen, R, Nichols, B, Quince, C, Ijaz, UZ, Papadopoulou, RT, Edwards, CA, Watson, D, Alghamdi, A, Brejnrod, A, Ansalone, C, Duncan, H, Gervais, L, Tayler, R, Salmund, J, Bolognini, D, Klopfleisch, R, Gaya, DR, Milling, S, Russell, RK; Gerasimidis, K                                                 | 2019 |
| The influence of patient and wound variables on healing of venous leg ulcers in a randomized controlled trial of growth-arrested allogeneic keratinocytes and fibroblasts                                                               | Lantis, , JC, Marston, WA, Farber, A, Kirsner, RS, Zhang, Y, Lee, TD, Cargill, DI; Slade, HB                                                                                                                                                                                                                            | 2013 |
| Evaluation of melatonin effectiveness in the adjuvant treatment of ulcerative colitis                                                                                                                                                   | Chojnacki, , C, Wisniewska-Jarosinska, M, Walecka-Kapica, E, Klupinska, G, Jaworek, J; Chojnacki, J                                                                                                                                                                                                                     | 2011 |
| Proteinuria in a placebo-controlled study of basic fibroblast growth factor for intermittent claudication                                                                                                                               | Cooper, , LT, Hiatt, WR, Creager, MA, Regensteiner, JG, Casscells, W, Isner, JM, Cooke, JP; Hirsch, AT                                                                                                                                                                                                                  | 2001 |
| Isolated central nervous system metastases in patients with HER2-overexpressing advanced breast cancer treated with first-line trastuzumab-based therapy                                                                                | Burstein, , HJ, Lieberman, G, Slamon, DJ, Winer, EP; Klein, P                                                                                                                                                                                                                                                           | 2005 |
| Role of insulin-like growth factor-I in the treatment of painful small fiber predominant neuropathy                                                                                                                                     | Windebank, , AJ, Sorenson, EJ, Civil, R; O'Brien, PC                                                                                                                                                                                                                                                                    | 2004 |
| Prevention of malnutrition among young children in rural Bangladesh by a food-health-care educational intervention: a randomized, controlled trial                                                                                      | Roy, , SK, Jolly, SP, Shafique, S, Fuchs, GJ, Mahmud, Z, Chakraborty, B; Roy, S                                                                                                                                                                                                                                         | 2007 |

|                                                                                                                                                                                             |                                                                                                                                                                                                                                                                                                                                                  |      |
|---------------------------------------------------------------------------------------------------------------------------------------------------------------------------------------------|--------------------------------------------------------------------------------------------------------------------------------------------------------------------------------------------------------------------------------------------------------------------------------------------------------------------------------------------------|------|
| Long-term inhaled corticosteroids in preschool children at high risk for asthma                                                                                                             | Guilbert, , TW, Morgan, WJ, Zeiger, RS, Mauger, DT, Bochner, SJ, Szeffler, SJ, Bacharier, LB, Lemanske, RF, Strunk, RC, Allen, DB, Bloomberg, GR, Heldt, G, Krawiec, M, Larsen, G, Liu, AH, Chinchilli, VM, Sorkness, CA, Taussig, LM; Martinez, FD                                                                                              | 2006 |
| The role of systemic steroids and phototherapy in the treatment of stable vitiligo: a randomized controlled trial                                                                           | El Mofty, , M, Essmat, S, Youssef, R, Sobeih, S, Mahgoub, D, Ossama, S, Saad, A, El Tawdy, A, Mashaly, HM, Saney, I, Helal, R; Shaker, O                                                                                                                                                                                                         | 2016 |
| Prediction of outcome in the treatment of onychomycosis                                                                                                                                     | Sommer, , S, Sheehan-Dare, RA, Goodfield, MJ; Evans, EG                                                                                                                                                                                                                                                                                          | 2003 |
| Intra-operative fracture risk - quantifying forces and strains during femoral stem implantation for compaction and extraction broached femurs                                               | Stockwell, , KD, Burnell, CD, Gascoyne, TC; Morrison, JB                                                                                                                                                                                                                                                                                         | 2016 |
| Short-term angiotensin II receptor antagonist therapy and the incidence of graft vessel disease after heart transplantation                                                                 | Meiser, , BM, Mueller, M, Foegh, M, Von Scheidt, W; Reichart, B                                                                                                                                                                                                                                                                                  | 2002 |
| A Randomized Trial of Providing BCG Vaccination Immediately                                                                                                                                 | NCT01989026                                                                                                                                                                                                                                                                                                                                      | 2013 |
| Edrecolomab in Treating Patients With Stage II Colon Cancer                                                                                                                                 | NCT00002968                                                                                                                                                                                                                                                                                                                                      | 1999 |
| Predictive factors of antiproliferative activity of octreotide LAR as first-line therapy for advanced neuroendocrine tumours                                                                | Laskaratos, , F-M, Walker, M, Naik, K, Maragkoudakis, E, Oikonomopoulos, N, Grant, L, Meyer, T, Caplin, M; Toumpanakis, C                                                                                                                                                                                                                        | 2016 |
| Effect of a Proposed Trastuzumab Biosimilar Compared With Trastuzumab on Overall Response Rate in Patients With ERBB2 (HER2)-Positive Metastatic Breast Cancer: a Randomized Clinical Trial | Rugo, , HS, Barve, A, Waller, CF, Hernandez-Bronchud, M, Herson, J, Yuan, J, Sharma, R, Baczkowski, M, Kothekar, M, Loganathan, S, Manikhas, A, Bondarenko, I, Mukhametshina, G, Nemsadze, G, Parra, JD, Abesamis-Tiambeng, ML, Baramidze, K, Akewanlop, C, Vynnychenko, I, Sriuranpong, V, Mamillapalli, G, Ray, S, Yanez Ruiz, EP; Pennella, E | 2017 |
| TRIBUTE: a phase III trial of erlotinib hydrochloride (OSI-774) combined with carboplatin and paclitaxel chemotherapy in advanced non-small-cell lung cancer                                | Herbst, , RS, Prager, D, Hermann, R, Fehrenbacher, L, Johnson, BE, Sandler, A, Kris, MG, Tran, HT, Klein, P, Li, X, Ramies, D, Johnson, DH; Miller, VA                                                                                                                                                                                           | 2005 |
| Evaluation of stress-related hormones after surgery by laparoscopy or laparotomy                                                                                                            | Muzii, , L, Marana, R, Marana, E, Paielli, FV, Meo, F, Maussier, ML, Sciarra, M; Mancuso, S                                                                                                                                                                                                                                                      | 1996 |
| Immediate incubation of blood cultures outside routine laboratory hours of operation accelerates antibiotic switching                                                                       | Kerremans, , JJ, van der Bij, AK, Goessens, W, Verbrugh, HA; Vos, MC                                                                                                                                                                                                                                                                             | 2009 |
| Randomized controlled trial of febuxostat versus allopurinol or placebo in individuals with higher urinary uric acid excretion and calcium stones                                           | Goldfarb, , DS, MacDonald, PA, Gunawardhana, L, Chefo, S; McLean, L                                                                                                                                                                                                                                                                              | 2013 |
| Treatment of transsphincteric fistula-in-ano with growth factors from autologous platelets: results of a phase II clinical trial                                                            | de la Portilla, , F, Segura-Sampedro, JJ, Reyes-Diaz, ML, Maestre, MV, Cabrera, AM, Jimenez-Rodriguez, RM, Vazquez-Monchul, JM, Diaz-Pavon, JM; Padillo-Ruiz, FJ                                                                                                                                                                                 | 2017 |
| MERIBEL study: single-agent eribulin as first-line therapy for taxane-resistant HER2 metastatic breast cancer (MBC) patients (pts)                                                          | Ortega, , V, Lao, J, Garau, I, Afonso, N, Calvo, L, Fernandez, Y, Martinez-Garcia, M, Blanco, E, Zamora, P, Garcia, M, Illarramendi, JJ, Rodriguez, C, Aguirre, E, Perez, J, Cortes Castan, J, Llombart-Cussac, A                                                                                                                                | 2016 |
| Acupuncture to Prevent Chemotherapy Dose Reduction Due to Chemotherapy-induced Peripheral Neuropathy in Breast and Colorectal Cancer Patients (GCC1232)                                     | NCT01881932                                                                                                                                                                                                                                                                                                                                      | 2013 |
| Serial enumeration of circulating tumor cells predicts treatment response and prognosis in metastatic breast cancer: a prospective study in 393 patients                                    | Wallwiener, , M, Riethdorf, S, Hartkopf, AD, Modugno, C, Nees, J, Madhavan, D, Sprick, MR, Schott, S, Domschke, C, Baccelli, I, Schonfisch, B, Burwinkel, B, Marme, F, Heil, J, Sohn, C, Pantel, K, Trumpp, A; Schneeweiss, A                                                                                                                    | 2014 |
| Safety and efficacy of intensive intraoperative glycaemic control in cardiopulmonary bypass surgery: a randomised trial                                                                     | Rujirojindakul, , P, Liabsuetrakul, T, McNeil, E, Chanchayanon, T, Wasinwong, W, Oofuvong, M, Rergkhang, C; Chittithavorn, V                                                                                                                                                                                                                     | 2014 |
| Improvement of short- and long-term outcomes for very low birth weight infants: edmonton NIDCAP trial                                                                                       | Peters, , KL, Rosychuk, RJ, Henderson, L, Coté, JJ, McPherson, C; Tyebkhan, JM                                                                                                                                                                                                                                                                   | 2009 |
| Trial of Radiofrequency Thermo-ablation Treatments of Great Saphenous Varicose Veins (3-RF Study)                                                                                           | NCT02441881                                                                                                                                                                                                                                                                                                                                      | 2015 |
| A randomized pilot trial testing the safety and immunologic effects of a MAGE-A3 protein plus AS15 immunostimulant administered into muscle or into dermal/subcutaneous sites               | Slingluff, , CL, Petroni, GR, Olson, WC, Smolkin, ME, Chianese-Bullock, KA, Mauldin, IS, Smith, KT, Deacon, DH, Varhegyi, NE, Donnelly, SB, Reed, CM, Scott, K, Galeassi, NV; Grosh, WW                                                                                                                                                          | 2016 |
| Secukinumab for ankylosing spondylitis and psoriatic arthritis                                                                                                                              | Lubrano, , E; Perrotta, FM                                                                                                                                                                                                                                                                                                                       | 2016 |
| Risk adapted therapy of AML in MRC/NCRI trials                                                                                                                                              | Russell, , NH; Hills, RK                                                                                                                                                                                                                                                                                                                         | 2017 |
| The posttrial effect of oral periodic presumptive treatment for vaginal infections on the incidence of bacterial vaginosis and Lactobacillus colonization                                   | Balkus, , JE, Jaoko, W, Mandaliya, K, Richardson, BA, Masese, L, Gitau, R, Kiarie, J, Marrazzo, J, Farquhar, C; McClelland, RS                                                                                                                                                                                                                   | 2012 |
| Temporary epicardial cardiac resynchronisation versus conventional right ventricular pacing after cardiac surgery: study protocol for a randomised control trial                            | Russell, , SJ, Tan, C, O'Keefe, P, Ashraf, S, Zaidi, A, Fraser, AG; Yousef, ZR                                                                                                                                                                                                                                                                   | 2012 |
| Results of 5-year follow-up study in patients with peripheral artery disease treated with PL-VEGF165 for intermittent claudication                                                          | Deev, , R, Plaksa, I, Bozo, I, Mzhavanadze, N, Suchkov, I, Chervyakov, Y, Staroverov, I, Kalinin, R; Isaev, A                                                                                                                                                                                                                                    | 2018 |
| Prospective safety surveillance of GH-deficient adults: comparison of GH-treated vs untreated patients                                                                                      | Hartman, , ML, Xu, R, Crowe, BJ, Robison, LL, Erfurth, EM, Kleinberg, DL, Zimmermann, AG, Woodmansee, WW, Cutler Jr, GB, Chipman, JJ; Melmed, S                                                                                                                                                                                                  | 2013 |
| Health Status After Transcatheter or Surgical Aortic Valve Replacement in Patients With Severe Aortic Stenosis at Increased Surgical Risk: results From the CoreValve US Pivotal Trial      | Arnold, , SV, Reynolds, MR, Wang, K, Magnuson, EA, Baron, SJ, Chinnakondepalli, KM, Reardon, MJ, Tadros, PN, Zorn, GL, Maini, B, Mumtaz, MA, Brown, JM, Kipperman, RM, Adams, DH, Popma, JJ; Cohen, DJ                                                                                                                                           | 2015 |

|                                                                                                                                                                                                                                                      |                                                                                                                                                                                                                                                                         |      |
|------------------------------------------------------------------------------------------------------------------------------------------------------------------------------------------------------------------------------------------------------|-------------------------------------------------------------------------------------------------------------------------------------------------------------------------------------------------------------------------------------------------------------------------|------|
| Effects of a mouthwash with chlorine dioxide on oral malodor and salivary bacteria: a randomized placebo-controlled 7-day trial                                                                                                                      | Shinada, , K, Ueno, M, Konishi, C, Takehara, S, Yokoyama, S, Zaitu, T, Ohnuki, M, Wright, FA; Kawaguchi, Y                                                                                                                                                              | 2010 |
| An intensive cardiovascular rehabilitation programme improves maximal oxygen uptake and quality of life in Danish patients with ischaemic heart disease                                                                                              | Skov, , J, Sidelmann, JJ, Pedersen, SFM, Fournaise, AV; Bladbjerg, EM                                                                                                                                                                                                   | 2012 |
| Morphological, Functional, and Biological Vascular Healing Response 6 Months After Drug-Eluting Stent Implantation: a Randomized Comparison of Three Drug-Eluting Stents                                                                             | Nakata, , T, Fujii, K, Fukunaga, M, Shibuya, M, Kawai, K, Kawasaki, D, Naito, Y, Ohyanagi, M; Masuyama, T                                                                                                                                                               | 2016 |
| Short-term effects of NPH insulin, insulin detemir, and insulin glargine on the GH-IGF1-IGFBP axis in patients with type 1 diabetes                                                                                                                  | Ma, , Z, Christiansen, JS, Laursen, T, Lauritzen, T; Frystyk, J                                                                                                                                                                                                         | 2014 |
| Efficacy and Tolerability of Subcutaneous Methylaltrexone in Patients with Advanced Illness and Opioid-Induced Constipation: a Responder Analysis of 2 Randomized, Placebo-Controlled Trials                                                         | Nalamachu, , SR, Pergolizzi, J, Taylor, R, Slatkin, NE, Barrett, AC, Yu, J, Bortey, E, Paterson, C; Forbes, WP                                                                                                                                                          | 2015 |
| A pilot study of the short term effects of testosterone in infants with 47,XXY klinefelter syndrome                                                                                                                                                  | Davis, , SM, Reynolds, R, Martin, S, Howell, S, Nokoff, NJ, Zeitler, PS; Tartaglia, N                                                                                                                                                                                   | 2017 |
| Efficacy of a triclosan formula in controlling early subgingival biofilm formation: a randomized trial                                                                                                                                               | Andrade, , E, Weidlich, P, Angst, PD, Gomes, SC; Oppermann, RV                                                                                                                                                                                                          | 2015 |
| A randomized study comparing filgrastim versus lenograstim versus molgramostim plus chemotherapy for peripheral blood progenitor cell mobilization                                                                                                   | Kopf, , B, De Giorgi, U, Vertogen, B, Monti, G, Molinari, A, Turci, D, Dazzi, C, Leoni, M, Tienghi, A, Cariello, A, Argnani, M, Frassinetti, L, Scarpi, E, Rosti, G; Marangolo, M                                                                                       | 2006 |
| Intravenous lipid dose and incidence of bacteremia and fungemia in patients undergoing bone marrow transplantation                                                                                                                                   | Lessen, , P, Bruemmer, BA, Bowden, RA, Gooley, T, Aker, SN; Mattson, D                                                                                                                                                                                                  | 1998 |
| Mechanism of Indocyanine Green-based Photodynamic Therapy for Treating Periodontitis                                                                                                                                                                 | NCT03557827                                                                                                                                                                                                                                                             | 2018 |
| Overall survival of patients with relapsed multiple myeloma treated with panobinostat or placebo plus bortezomib and dexamethasone (the PANORAMA 1 trial): a randomised, placebo-controlled, phase 3 trial                                           | San-Miguel, , JF, Hungria, VT, Yoon, SS, Beksac, M, Dimopoulos, MA, Elghandour, A, Jedrzejczak, WW, Günther, A, Nakorn, TN, Siritanaratkul, N, Schlossman, RL, Hou, J, Moreau, P, Lonial, S, Lee, JH, Einsele, H, Sopala, M, Bengoudifa, BR, Binlich, F; Richardson, PG | 2016 |
| Tight Glycemic Control Reduces Heart Inflammation and Remodeling During Acute Myocardial Infarction in Hyperglycemic Patients                                                                                                                        | Marfella, , R, Di Filippo, C, Portoghese, M, Ferraraccio, F, Rizzo, MR, Siniscalchi, M, Musacchio, E, D'Amico, M, Rossi, F; Paolisso, G                                                                                                                                 | 2009 |
| Effect of recombinant human growth hormone with total parenteral nutrition on albumin synthesis in patients with peritoneal sepsis                                                                                                                   | Li, , W, Li, J, Xu, B, Yin, L, Wang, L, Gu, J, Ren, J; Quan, Z                                                                                                                                                                                                          | 1998 |
| Fiblast (trafermin) in acute stroke: results of the European-Australian phase II/III safety and efficacy trial                                                                                                                                       | Bogousslavsky, , J, Victor, SJ, Salinas, EO, Pallay, A, Donnan, GA, Fieschi, C, Kaste, M, Orgogozo, JM, Chamorro, A; Desmet, A                                                                                                                                          | 2002 |
| Acute effects of very-low-protein diet on FGF23 levels: a randomized study                                                                                                                                                                           | Di Iorio, , B, Di Micco, L, Torraca, S, Sirico, ML, Russo, L, Pota, A, Mirengi, F; Russo, D                                                                                                                                                                             | 2012 |
| Eribulin across multiple lines of chemotherapy: a retrospective study on quality of life and efficacy in metastatic breast cancer patients                                                                                                           | Quaquarini, , E, Sottotetti, F, D'Ambrosio, D, Malovini, A, Morganti, S, Marinello, A, Pavesi, L; Frascaroli, M                                                                                                                                                         | 2017 |
| A prospective randomised study on endotoxaemia, mediator release and morbidity in conventional, compared with laparoscopic cholecystectomy                                                                                                           | Bolke, , E, Jehle, PM, Nothnagel, B, Seidelmann, M, Storck, M; Orth, K                                                                                                                                                                                                  | 2000 |
| Effects of bovine serum concentrate, with or without supplemental micronutrients, on the growth, morbidity, and micronutrient status of young children in a low-income, peri-urban Guatemalan community                                              | Bégin, , F, Santizo, MC, Peerson, JM, Torún, B; Brown, KH                                                                                                                                                                                                               | 2008 |
| The clinical evaluation of Platelet-Rich Plasma effects on Free Gingival Graft's donor site wound healing                                                                                                                                            | IRCT138812093451N1                                                                                                                                                                                                                                                      | 2011 |
| Aspirin plus calcium supplementation to prevent superimposed preeclampsia: a randomized trial                                                                                                                                                        | Souza, , EV, Torloni, MR, Atallah, AN, Santos, GM, Kulay, L; Sass, N                                                                                                                                                                                                    | 2014 |
| Influence of exercise training on proangiogenic TIE-2 monocytes and circulating angiogenic cells in patients with peripheral arterial disease                                                                                                        | Dopheide, , JF, Geissler, P, Rubrech, J, Trumpp, A, Zeller, GC, Daiber, A, Münzel, T, Radsak, MP; Espinola-Klein, C                                                                                                                                                     | 2016 |
| Safety and efficacy of intravenous ultra-high dose methylcobalamin treatment for peripheral neuropathy: a phase I/II open label clinical trial                                                                                                       | Shibuya, , K, Misawa, S, Nasu, S, Sekiguchi, Y, Beppu, M, Iwai, Y, Mitsuma, S, Iose, S, Arimura, K, Kaji, R; Kuwabara, S                                                                                                                                                | 2014 |
| Feeding late and moderately preterm infants                                                                                                                                                                                                          | ISRCTN15469594                                                                                                                                                                                                                                                          | 2018 |
| Magnesium sulphate in continuous administration compare to discontinuous administration in the expectant management of severe preeclampsia: randomized controlled trial                                                                              | EUCTR2011-002095-17-ES                                                                                                                                                                                                                                                  | 2011 |
| Differentially Enhancing Effects of Long-term Treatment with Serrazyme, Boswellia and Pine on Seminal Bacterial Detection in Patients with Chronic Bacterial or Inflammatory Prostatitis, Probably Related to Several Degrees of Bacterial Adherence | Vicari, , E, Malaguarnera, G, Vicari, BO, Salmeri, M, Salemi, M; Castiglione, R                                                                                                                                                                                         | 2018 |
| An international multi-centre open-label 2-arm phase III trial of adjuvant bevacizumab in triple negative breast cancer. - BEATRICE                                                                                                                  | EUCTR2007-001128-11-AT                                                                                                                                                                                                                                                  | 2007 |
| A clinical trial assessing the effect of a new antibiotic (Solithromycin) on inflammation in the small air passages of patients with chronic obstructive pulmonary disease                                                                           | EUCTR2014-003077-42-GB                                                                                                                                                                                                                                                  | 2015 |
| Cell therapy for cardiac repair through mobilization of hematopoietic stem cells and endothelial progenitors in patients with chronic ischemic cardiomyopathy. - NA                                                                                  | EUCTR2004-004545-18-BE                                                                                                                                                                                                                                                  | 2005 |
| Clinical evaluation of the efficacy of a novel wound dressing on treatment of wagner ulcer grade II                                                                                                                                                  | IRCT2016071328903N1                                                                                                                                                                                                                                                     | 2016 |
| Prevention of dialysate-induced peritoneal damage by pyridoxal phosphate                                                                                                                                                                             | JPRN-UMIN00001287                                                                                                                                                                                                                                                       | 2008 |
| Dose finding study of OMT-28 in subjects with persistent atrial fibrillation                                                                                                                                                                         | EUCTR2018-001626-26-HU                                                                                                                                                                                                                                                  | 2019 |

|                                                                                                                                                                                                                                                     |                                                                                                                                                                                                                                                                                                                                                                                                                                                                                                                                                                                                                                                                                                                                                                                                                                                                                                                                                                    |      |
|-----------------------------------------------------------------------------------------------------------------------------------------------------------------------------------------------------------------------------------------------------|--------------------------------------------------------------------------------------------------------------------------------------------------------------------------------------------------------------------------------------------------------------------------------------------------------------------------------------------------------------------------------------------------------------------------------------------------------------------------------------------------------------------------------------------------------------------------------------------------------------------------------------------------------------------------------------------------------------------------------------------------------------------------------------------------------------------------------------------------------------------------------------------------------------------------------------------------------------------|------|
| ATTACHE: a Trial in the Timing of Surgery and Adjuvant Chemotherapy for Hepatic Metastases from Colorectal Cancer                                                                                                                                   | ACTRN12610000647033                                                                                                                                                                                                                                                                                                                                                                                                                                                                                                                                                                                                                                                                                                                                                                                                                                                                                                                                                | 2010 |
| Effects of non-surgical periodontal treatment on clinical, immunological responses and metabolic control in type 2 diabetic patients: a randomized study                                                                                            | ChiCTR-TRC-10001062                                                                                                                                                                                                                                                                                                                                                                                                                                                                                                                                                                                                                                                                                                                                                                                                                                                                                                                                                | 2010 |
| The clinical efficacy of non-surgical periodontal debridement alone, adjunctive systemic azithromycin, or amoxicillin-metronidazole therapy in patients with chronic moderate-to-advanced periodontitis                                             | ACTRN12618000957291                                                                                                                                                                                                                                                                                                                                                                                                                                                                                                                                                                                                                                                                                                                                                                                                                                                                                                                                                | 2018 |
| Effect of probiotic supplementation on presence of supplemented bacteria in breast milk, some of milk's immune and oxidative factors, mothers' nutritional status and infants' growth                                                               | IRCT201110181197N12                                                                                                                                                                                                                                                                                                                                                                                                                                                                                                                                                                                                                                                                                                                                                                                                                                                                                                                                                | 2011 |
| Endophthalmitis Post Intravitreal Injections                                                                                                                                                                                                        | NCT04035369                                                                                                                                                                                                                                                                                                                                                                                                                                                                                                                                                                                                                                                                                                                                                                                                                                                                                                                                                        | 2019 |
| The effect of introduction of umbilical Doppler recordings to obstetric practice                                                                                                                                                                    | Johnstone, , FD, Prescott, R, Hoskins, P, Greer, IA, McGlew, T; Compton, M                                                                                                                                                                                                                                                                                                                                                                                                                                                                                                                                                                                                                                                                                                                                                                                                                                                                                         | 1993 |
| Liraglutide to Short Bowel Syndrome, a cross-over study                                                                                                                                                                                             | EUCTR2015-000825-35-DK                                                                                                                                                                                                                                                                                                                                                                                                                                                                                                                                                                                                                                                                                                                                                                                                                                                                                                                                             | 2015 |
| Low level laser effect on improving the blood flow in diabetic foot ulcers                                                                                                                                                                          | IRCT2014051717723N1                                                                                                                                                                                                                                                                                                                                                                                                                                                                                                                                                                                                                                                                                                                                                                                                                                                                                                                                                | 2015 |
| A Phase 2 placebo-controlled study to evaluate the mechanistic effect, safety, and tolerability of alvelestat (MPH966) in participants with alpha-1 (PiZZ or null genotype/phenotype) antitrypsin deficiency                                        | EUCTR2018-001309-95-ES                                                                                                                                                                                                                                                                                                                                                                                                                                                                                                                                                                                                                                                                                                                                                                                                                                                                                                                                             | 2018 |
| Pre-operative volume replacement versus usual care in diabetic patients having coronary artery bypass graft (CABG) surgery: a randomised controlled trial                                                                                           | ISRCTN02159606                                                                                                                                                                                                                                                                                                                                                                                                                                                                                                                                                                                                                                                                                                                                                                                                                                                                                                                                                     | 2008 |
| Atezolizumab with or without cobimetinib versus regorafenib in previously treated metastatic colorectal cancer (IMblaze370): a multicentre, open-label, phase 3, randomised, controlled trial                                                       | Eng, , C, Kim, TW, Bendell, J, Argiles, G, Tebbutt, NC, Di Bartolomeo, M, Falcone, A, Fakih, M, Kozloff, M, Segal, NH, Sobrero, A, Yan, Y, Chang, I, Uyei, A, Roberts, L, Ciardiello, F, Ahn, JB, Asselah, J, Badarinarath, S, Baijal, S, Begbie, S, Berry, S, Canon, JL, Carbone, RG, Cervantes, A, Cha, YJ, Chang, K, Chaudhry, A, Chmielowska, E, Cho, SH, Chu, D, Couture, F, Cultrera, J, Cunningham, D, Van Cutsem, E, Cuyle, PJ, Davies, J, Dowden, S, Dvorkin, M, Ganju, V, Garcia, RV, Kerr, R, Kim, TY, King, K, Kortmansky, J, Kozloff, M, Lam, KO, Lee, J, Lee, AS, Lesperance, B, Luppi, G, Ma, B, Maiello, E, Mandanas, R, Marshall, J, Marx, G, Mullamitha, S, Nechaeva, M, Park, JO, Pavlakakis, N, Ponce, CG, Potemski, P, Raouf, S, Reeves, J, Segal, N, Siena, S, Smolin, A, Streb, JO, Strickland, A, Szutowicz-Zielinska, E, Tabernero, JM, Tan, B, Valera, JS, Van den Eynde, M, Vergauwe, P, Vickers, M, Womack, M, Wroblewska, M; Young, R | 2019 |
| Evaluation of the effect of two gingival treatments in the development of gingival disease in children with heart disease                                                                                                                           | RBR-9gfm5                                                                                                                                                                                                                                                                                                                                                                                                                                                                                                                                                                                                                                                                                                                                                                                                                                                                                                                                                          | 2013 |
| Efficacy and safety of Shen-Yuan-Dan capsules for peri-procedural myocardial injury following percutaneous coronary intervention: study protocol for a randomized, double-blind, placebo-controlled trial                                           | Li, , X, Lai, X-L, Fei, Y-T, Shang, J-J, Zhou, Q, Sun, X-Y, Xing, W-L, Jia, S-H; Liu, H-X                                                                                                                                                                                                                                                                                                                                                                                                                                                                                                                                                                                                                                                                                                                                                                                                                                                                          | 2019 |
| Predictors for use of psychosocial services in patients with metastatic colorectal cancer receiving first line systemic treatment                                                                                                                   | Schuurhuizen, , CSEW, Braamse, AMJ, Konings, IRHM, Verheul, HMW; Dekker, J                                                                                                                                                                                                                                                                                                                                                                                                                                                                                                                                                                                                                                                                                                                                                                                                                                                                                         | 2019 |
| Multi-center, randomized, double-blind, placebo-controlled, cross-over Phase II study to evaluate the safety and efficacy of inhaled Bimosiamose for the treatment of patients with moderate to severe Chronic Obstructive Pulmonary Disease (COPD) | EUCTR2009-017257-35-DE                                                                                                                                                                                                                                                                                                                                                                                                                                                                                                                                                                                                                                                                                                                                                                                                                                                                                                                                             | 2009 |
| Oral anabolic steroid increases muscle products in hemodialysis patients                                                                                                                                                                            | ISRCTN41591818                                                                                                                                                                                                                                                                                                                                                                                                                                                                                                                                                                                                                                                                                                                                                                                                                                                                                                                                                     | 2012 |
| The Interval between Treatments of Bevacizumab and Dexamethasone Implants for Diabetic Macular Edema Increased over Time in the BEVORDEX Trial                                                                                                      | Mehta, , H, Fraser-Bell, S, Nguyen, V, Lim, LL; Gillies, MC                                                                                                                                                                                                                                                                                                                                                                                                                                                                                                                                                                                                                                                                                                                                                                                                                                                                                                        | 2018 |
| A Randomized (Phase II), Double-blind, Multicenter Phase I/II trial of Pemetrexed, Carboplatin plus or minus Sorafenib in the First-line Treatment of Patients with Stage IIIb or IV Non-Small Cell Lung Cancer - PECASO                            | EUCTR2006-005970-26-DE                                                                                                                                                                                                                                                                                                                                                                                                                                                                                                                                                                                                                                                                                                                                                                                                                                                                                                                                             | 2007 |
| Double-Blind Placebo-Controlled Study of Rifaximin and Lactulose Hydrogen Breath Test in Gulf War Veterans with Irritable Bowel Syndrome                                                                                                            | Tuteja, , AK, Talley, NJ, Stoddard, GJ; Verne, GN                                                                                                                                                                                                                                                                                                                                                                                                                                                                                                                                                                                                                                                                                                                                                                                                                                                                                                                  | 2019 |
| The adjunctive effects of Omega-3 dietary supplementation in the treatment of periodontitis                                                                                                                                                         | ISRCTN23257928                                                                                                                                                                                                                                                                                                                                                                                                                                                                                                                                                                                                                                                                                                                                                                                                                                                                                                                                                     | 2015 |
| The role of growth factor administration and T-cell recovery after peripheral blood progenitor cell transplantation in the treatment of solid tumors: results from a randomized comparison of G-CSF and GM-CSF                                      | Pierelli, , L, Perillo, A, Ferrandina, G, Salerno, G, Rutella, S, Fattorossi, A, Battaglia, A, Rughetti, A, Nuti, M, Cortesi, E, Leone, G, Mancuso, S; Scambia, G                                                                                                                                                                                                                                                                                                                                                                                                                                                                                                                                                                                                                                                                                                                                                                                                  | 2001 |
| Effect of ?-3 fatty acids on gastric cancer patients                                                                                                                                                                                                | IRCT201011095144N1                                                                                                                                                                                                                                                                                                                                                                                                                                                                                                                                                                                                                                                                                                                                                                                                                                                                                                                                                 | 2011 |
| Effect of dried hydro alcoholic extract of pomegranate pericarp on oxidative and inflammation state, Metalloproteinase 1, metabolic markers and clinical sign in women with knee osteoarthritis                                                     | IRCT201405183664N11                                                                                                                                                                                                                                                                                                                                                                                                                                                                                                                                                                                                                                                                                                                                                                                                                                                                                                                                                | 2014 |
| A Phase 3 Study to Compare the Efficacy and Safety of CT-P6 and Herceptin as Neoadjuvant and Adjuvant Treatment in Patients with HER2-Positive Early Breast Cancer                                                                                  | EUCTR2013-004525-84-PL                                                                                                                                                                                                                                                                                                                                                                                                                                                                                                                                                                                                                                                                                                                                                                                                                                                                                                                                             | 2014 |

|                                                                                                                                                                                                                                    |                                                                                                                                                                                                                      |      |
|------------------------------------------------------------------------------------------------------------------------------------------------------------------------------------------------------------------------------------|----------------------------------------------------------------------------------------------------------------------------------------------------------------------------------------------------------------------|------|
| Clinical Safety and Preliminary Efficacy of Plasmid pUDK-HGF Expressing Human Hepatocyte Growth Factor (HGF) in Patients with Critical Limb Ischemia                                                                               | Cui, , S, Guo, L, Li, X, Gu, Y, Fu, J, Dong, L, Song, H, Chen, X, Lu, Y, Hu, C, Xiao, F, Zhu, D, Wu, Z; Zhang, Q                                                                                                     | 2015 |
| Study to Evaluate Imetelstat (JNJ-63935937) in Subjects with IPSS Low or Intermediate-1 Risk Myelodysplastic Syndrome (MDS)                                                                                                        | EUCTR2015-002874-19-DE                                                                                                                                                                                               | 2015 |
| Effect of carvedilol medication and vitamins E and C in patients with Chagas' disease                                                                                                                                              | RBR-95jnqp                                                                                                                                                                                                           | 2012 |
| A Phase II Study of Efficacy of Rabbit Anti-thymocyte Globulin (rATG) in patients with Low and Intermediate-1 Risk Myelodysplastic Syndrome - Genzyme ThymoHEMO1206: phase II study of Thymoglobulin in MDS patients               | EUCTR2007-002532-28-NL                                                                                                                                                                                               | 2008 |
| CORE Trial                                                                                                                                                                                                                         | ISRCTN45961438                                                                                                                                                                                                       | 2016 |
| Targeting on the values of Wolbachia endosymbionts as novel feasible anti-filarial chemotherapeutic approach to prevent/reduce/clear disease in lymphatic filariasis and interrupt transmission in endemic communities of Tanzania | ISRCTN12273637                                                                                                                                                                                                       | 2009 |
| A study of test product setrusumab in adults with brittle bone syndrome                                                                                                                                                            | EUCTR2016-005096-27-DK                                                                                                                                                                                               | 2017 |
| Leukocyte filter enhances neutrophil activation during combined aortic valve and coronary artery bypass surgery                                                                                                                    | Koskenkari, , JK, Rimpiläinen, J, Ohman, H, Surcel, HM, Vainionpää, V, Biancari, F, Ala-Kokko, T; Juvonen, T                                                                                                         | 2006 |
| Effect of essential fatty acids on natural cytotoxicity in patients with colorectal cancer                                                                                                                                         | Purasiri, , P, Ashby, J, Heys, SD; Eremin, O                                                                                                                                                                         | 1995 |
| Epigenetic alterations at diagnosis predict susceptibility, prognosis and treatment escalation in inflammatory bowel disease and IBD character                                                                                     | Kalla, , R, Adams, A, Vatn, S, Bonfiglio, F, Nimmo, E, Kennedy, N, Ventham, N, Vatn, MH, Ricanek, P, Bergemalm, D, Halfvarson, J, Soderholm, J, Pierik, M, Torkvist, L, Gomollon, F, Gut, I, Jahnsen, J; Satsangi, J | 2017 |
| Sarcopenia Improves the Muscle Mass and Muscle Strength of Patients With Liver Cirrhosis-Child C                                                                                                                                   | NCT03633279                                                                                                                                                                                                          | 2018 |
| Ezetimibe and simvastatin combination inhibits and reverses the pro-inflammatory and pro-atherogenic effects of cream in obese patients                                                                                            | Ghanim, , H, Green, K, Abuaysheh, S, Patel, R, Batra, M, Chaudhuri, A, Makdissi, A, Kuhadiya, ND; Dandona, P                                                                                                         | 2017 |
| Short-term effects of an anti-inflammatory treatment on clinical parameters and serum levels of C-reactive protein and proinflammatory cytokines in subjects with periodontitis                                                    | Renvert, , S, Lindahl, C, Roos-Jansåker, AM; Lessem, J                                                                                                                                                               | 2009 |
| Surgical and not analgesic technique affects postoperative inflammation following colorectal cancer surgery: a prospective, randomized study                                                                                       | Siekmann, , W, Eintrei, C, Magnuson, A, Sjölander, A, Matthiessen, P, Myrelid, P; Gupta, A                                                                                                                           | 2017 |
| Effects of minimal dose aprotinin on blood loss and fibrinolytic system-complement activation in coronary artery bypass grafting surgery                                                                                           | Cicekcioglu, , F, Cagli, K, Emir, M, Topbas, M, Catav, Z, Sener, E; Tasdemir, O                                                                                                                                      | 2006 |
| Quetiapine and flupentixol differentially improve anterior cingulate cortex function in schizophrenia patients: an event-related potential study                                                                                   | Schneider, , S, Bahmer, TJ, Metzger, FG, Reif, A, Polak, T, Pfuhlmann, B, Walter, G, Eberle, MC, Ernst, LH, Fallgatter, AJ; Ehlis, AC                                                                                | 2013 |
| Limited efficacy of thalidomide in the treatment of febrile attacks of the hyper-IgD and periodic fever syndrome: a randomized, double-blind, placebo-controlled trial                                                             | Drenth, , JP, Vonk, AG, Simon, A, Powell, R; van der Meer, JW                                                                                                                                                        | 2001 |
| Non-surgical periodontal therapy with and without subgingival minocycline administration in patients with poorly controlled type II diabetes: a randomized controlled clinical trial                                               | Lin, , SJ, Tu, YK, Tsai, SC, Lai, SM; Lu, HK                                                                                                                                                                         | 2012 |
| High-dose insulin therapy attenuates systemic inflammatory response in coronary artery bypass grafting patients                                                                                                                    | Albacker, , T, Carvalho, G, Schricker, T; Lachapelle, K                                                                                                                                                              | 2008 |
| Spironolactone for People Age 70 Years and Older With Osteoarthritic Knee Pain: a Proof-of-Concept Trial                                                                                                                           | Mcmurdo, , ME, Sumukadas, D, Donnan, PT, Cvorov, V, Rauchhaus, P, Argo, I, Waldie, H, Littleford, R, Struthers, AD; Witham, MD                                                                                       | 2016 |
| Predictors of post-operative response to treatment: a double blind placebo controlled study in chronic rhinosinusitis patients                                                                                                     | Ebbens, , FA, Toppila-Salmi, S, de Groot, EJ, Renkonen, J, Renkonen, R, van Drunen, CM, Dijkgraaf, MG; Fokkens, WJ                                                                                                   | 2011 |
| Multicenter analysis of neoadjuvant docetaxel, carboplatin, and trastuzumab in HER2-positive breast cancer                                                                                                                         | Echavarria, , I, Granja, M, Bueno, C, Lopez-Tarruella, S, Peinado, P, Sotelo, M, Jerez, Y, Moreno, F, Torres, G, Lobo, M, Marquez-Rodas, I, Del Monte-Millan, M, Martin, M; Garcia-Saenz, JA                         | 2017 |
| Periodontal treatment decreases levels of antibodies to Porphyromonas gingivalis and citrulline in patients with rheumatoid arthritis and periodontitis                                                                            | Okada, , M, Kobayashi, T, Ito, S, Yokoyama, T, Abe, A, Murasawa, A; Yoshie, H                                                                                                                                        | 2013 |
| A Novel Drug for Treatment of Necrotizing Soft-Tissue Infections: a Randomized Clinical Trial                                                                                                                                      | Bulger, , EM, Maier, RV, Sperry, J, Joshi, M, Henry, S, Moore, FA, Moldawer, LL, Demetriades, D, Talving, P, Schreiber, M, Ham, B, Cohen, M, Opal, S, Segalovich, I, Maislin, G, Kaempfer, R; Shirvan, A             | 2014 |
| Combined photodynamic and low-level laser therapies as an adjunct to nonsurgical treatment of chronic periodontitis                                                                                                                | Lui, , J, Corbet, EF; Jin, L                                                                                                                                                                                         | 2011 |
| Characteristics of patients who respond poorly to reduction of biological disease-modifying anti-rheumatic drugs in rheumatoid arthritis; Rt-4 study post hoc analysis                                                             | Urata, , Y, Abe, S, Devers, B, Nakamura, Y, Takemoto, H; Furukawa, K-I                                                                                                                                               | 2017 |
| Prevention of postoperative recurrence with azathioprine or infliximab in patients with Crohn's disease: an open-label pilot study                                                                                                 | Armuzzi, , A, Felice, C, Papa, A, Marzo, M, Pugliese, D, Andrisani, G, Federico, F, De Vitis, I, Rapaccini, GL; Guidi, L                                                                                             | 2013 |
| Joint Inflammatory Bowel Disease-Obstetric clinics: outcomes in 95 pregnancies at a tertiary centre over a 3-year period                                                                                                           | Chew, , TS, Carmichael, MS, Hoare, TW, Waugh, J; Gunn, MC                                                                                                                                                            | 2017 |
| Preoperative steroid treatment does not improve markers of inflammation after cardiac surgery in neonates: results from a randomized trial                                                                                         | Graham, , EM, Atz, AM, McHugh, KE, Butts, RJ, Baker, NL, Stroud, RE, Reeves, ST, Bradley, SM, McGowan, FX; Spinale, FG                                                                                               | 2014 |
| Evaluation of a protease inhibitor in the prevention of ischemia and reperfusion injury in hepatectomy under intermittent Pringle maneuver                                                                                         | Kim, , YI, Chung, HJ, Song, KE, Hwang, YJ, Lee, JW, Lee, YJ; Chun, BY                                                                                                                                                | 2006 |

|                                                                                                                                                                                                                           |                                                                                                                                                                                                                                                                                |      |
|---------------------------------------------------------------------------------------------------------------------------------------------------------------------------------------------------------------------------|--------------------------------------------------------------------------------------------------------------------------------------------------------------------------------------------------------------------------------------------------------------------------------|------|
| Efficacy and tolerability of an undenatured type II collagen supplement in modulating knee osteoarthritis symptoms: a multicenter randomized, double-blind, placebo-controlled study                                      | Lugo, , JP, Saiyed, ZM; Lane, NE                                                                                                                                                                                                                                               | 2016 |
| Doppler tissue imaging is an independent predictor of outcome in patients with ST-segment elevation myocardial infarction treated with primary percutaneous coronary intervention                                         | Biering-Sørensen, , T, Jensen, JS, Pedersen, S, Galatius, S, Hoffmann, S, Jensen, MT; Mogelvang, R                                                                                                                                                                             | 2014 |
| The effect of initial treatment of periodontitis on systemic markers of inflammation and cardiovascular risk: a randomized controlled trial                                                                               | Taylor, , B, Tofler, G, Morel-Kopp, MC, Carey, H, Carter, T, Elliott, M, Dailey, C, Villata, L, Ward, C, Woodward, M; Schenck, K                                                                                                                                               | 2010 |
| GnRH-a and Pregnancy Rate in In Vitro Fertilization (IVF) Cycles                                                                                                                                                          | NCT01269125                                                                                                                                                                                                                                                                    | 2011 |
| Transvaginal/transumbilical hybrid–NOTES–versus 3-trocar needlescopic cholecystectomy: short-term results of a randomized clinical trial                                                                                  | Bulian, , DR, Knuth, J, Cerasani, N, Sauerwald, A, Lefering, R; Heiss, MM                                                                                                                                                                                                      | 2015 |
| Controversy of hormone treatment and cardiovascular function: need for strengthened collaborations between preclinical and clinical scientists                                                                            | Miller, , VM, Shuster, LT; Hayes, SN                                                                                                                                                                                                                                           | 2003 |
| Prospective randomized trial evaluating mandatory second look surgery with HIPEC and CRS vs. standard of care in patients at high risk of developing colorectal peritoneal metastases                                     | Ripley, , RT, Davis, JL, Kemp, CD, Steinberg, SM, Toomey, MA; Avital, I                                                                                                                                                                                                        | 2010 |
| Post Implantation Syndrome and Administration on NSAIDs in Patients Undergoing EVAR for AAA                                                                                                                               | NCT03727412                                                                                                                                                                                                                                                                    | 2018 |
| Comparison of Functional Recovery Between Laparoscopic and Open Pancreaticoduodenectomy                                                                                                                                   | NCT03870698                                                                                                                                                                                                                                                                    | 2019 |
| Association between biochemical cartilage markers and clinical symptoms in patients with hip osteoarthritis: cohort study with two-year follow-up                                                                         | Dorleijn, , DM, Luijsterburg, PA, Bay-Jensen, AC, Siebuhr, AS, Karsdal, M, Rozendaal, RM, Bos, PK; Bierma-Zeinstra, SM                                                                                                                                                         | 2014 |
| Protective effect of propofol and its relation to postoperation recovery in children undergoing cardiac surgery with cardiopulmonary bypass                                                                               | Xia, , WF, Liu, Y, Zhou, QS, Tang, QZ; Zou, HD                                                                                                                                                                                                                                 | 2011 |
| The importance of the tumor marker CYFRA 21-1 in patients with lung cancer after surgery or chemotherapy                                                                                                                  | Zissimopoulos, , A, Stellos, K, Permenopoulou, V, Petrakis, G, Theodorakopoulos, P, Baziotis, N; Thalassinou, N                                                                                                                                                                | 2007 |
| Homeopathy for Perennial Asthma in Adolescents: pilot Feasibility Study Testing a Randomised Withdrawal Design                                                                                                            | Mitchiguian Hotta, , L, Cardinali Adler, U, de Toledo Cesar, A, Martinez, EZ; Demarzo, MMP                                                                                                                                                                                     | 2018 |
| Effect of Non-surgical Periodontal Treatment on HbA1c in Type 2 Diabetic Patients                                                                                                                                         | NCT02652026                                                                                                                                                                                                                                                                    | 2015 |
| The role of genetic-based prognostic factors in predicting minimal residual disease negativity in chronic lymphocytic leukemia patients treated with fludarabine, cyclophosphamide and ofatumumab                         | Raponi, , S, Del Giudice, I, Ilari, C, Luciana, C, Della Starza, I, De Propriis, MS, Nanni, M, Cavalli, M, De Novi, LA, Mariglia, P, Mancini, F, Nardacci, MG, Picciocchi, A, Albano, F, Specchia, G, Cuneo, A, Fabris, S, Neri, A, Vignetti, M, Mauro, FR, Guarini, A; Foa, R | 2017 |
| Novel PARadigm to improve Inflammatory burden in end stage Renal disease (rePAIR): study protocol for a randomized controlled trial                                                                                       | Trivedi, , R, Fares, G, Nunez, VB, Campbell, R, Clement, M, Burleson, J, Himmelfarb, J; Ioannidou, E                                                                                                                                                                           | 2018 |
| A prospective randomized study of systemic inflammation and immune response after laparoscopic nissen fundoplication performed with standard and low-pressure pneumoperitoneum                                            | Schietroma, , M, Carlei, F, Cecilia, EM, Piccione, F, Sista, F, De Vita, F; Amicucci, G                                                                                                                                                                                        | 2013 |
| AMPLIFYing NEOepitope-specific VACcine Responses in Progressive Diffuse Glioma                                                                                                                                            | NCT03893903                                                                                                                                                                                                                                                                    | 2019 |
| Effective flow performances and dialysis doses delivered with permanent catheters: a 24-month comparative study of permanent catheters versus arterio-venous vascular accesses                                            | Canaud, , B, Leray-Moragues, H, Kerkeni, N, Bosc, JY; Martin, K                                                                                                                                                                                                                | 2002 |
| N-Acetylcysteine inhalation improves pulmonary function in patients received liver transplantation                                                                                                                        | Li, , X, Wei, X, Chen, C, Zhang, Z, Liu, D, Hei, Z; Yao, W                                                                                                                                                                                                                     | 2018 |
| Protein array profiling of circulating angiogenesis-related factors during bevacizumab containing treatment in metastatic colorectal cancer                                                                               | Hagman, , H, Bendahl, P-O, Lidfeldt, J, Belting, M; Johnsson, A                                                                                                                                                                                                                | 2018 |
| Re: 'Long-term Results of a Randomized Controlled Trial Analyzing the Role of Systematic Pre-operative Coronary Angiography before Elective Carotid Endarterectomy in Patients with Asymptomatic Coronary Artery Disease' | Galyfos, , G, Sigala, F, Aggeli, K; Filis, K                                                                                                                                                                                                                                   | 2015 |
| SHINBARO, a new herbal medicine with multifunctional mechanism for joint disease: first therapeutic application for the treatment of osteoarthritis                                                                       | Lee, , S-Y, Kwon, H-K; Lee, S-M                                                                                                                                                                                                                                                | 2011 |
| Systemic cytokine response after laparoscopic-assisted resection of rectosigmoid carcinoma: a prospective randomized trial                                                                                                | Leung, , KL, Lai, PB, Ho, RL, Meng, WC, Yiu, RY, Lee, JF; Lau, WY                                                                                                                                                                                                              | 2000 |
| The anti-rheumatic effect of multiple synovectomy in patients with refractory rheumatoid arthritis                                                                                                                        | Nakamura, , H, Nagashima, M, Ishigami, S, Wauke, K; Yoshino, S                                                                                                                                                                                                                 | 2000 |
| The effects of cardiopulmonary bypass temperature on inflammatory response following cardiopulmonary bypass                                                                                                               | Birdi, , I, Caputo, M, Underwood, M, Bryan, AJ; Angelini, GD                                                                                                                                                                                                                   | 1999 |
| 7-day Atorvastatin and Emotional Processing                                                                                                                                                                               | NCT03966859                                                                                                                                                                                                                                                                    | 2019 |
| Treatment of adult chronic indeterminate Chagas disease with benznidazole and three E1224 dosing regimens: a proof-of-concept, randomised, placebo-controlled trial                                                       | Torrico, , F, Gascon, J, Ortiz, L, Alonso-Vega, C, Pinazo, MJ, Schijman, A, Almeida, IC, Alves, F, Strub-Wourgaft, N; Ribeiro, I                                                                                                                                               | 2018 |
| Infusion of the allogeneic cell line NK-92 in patients with advanced renal cell cancer or melanoma: a phase I trial                                                                                                       | Arai, , S, Meagher, R, Swearingen, M, Myint, H, Rich, E, Martinson, J; Klingemann, H                                                                                                                                                                                           | 2008 |
| Efficacy of pertuzumab/trastuzumab/paclitaxel over standard trastuzumab/paclitaxel therapy for HER2+ breast cancer: results from the neoadjuvant I-SPY 2 TRIAL                                                            | Buxton, , M, DeMichele, AM, Chia, S, Van't Veer, L, Chien, J, Wallace, A, Kaplan, H, Lang, J, Yee, D, Isaacs, C, Moulder, S, Albain, K, Boughey, J, Kemmer, K, Haley, B, Minton, S, Forero, A, Nanda, R, Elias, A, Korde, L, Viscuzi, R, Rugo, H, Schwab, R,                   | 2016 |



|                                                                                                                                                                                                                             |                                                                                                                                                                                                                                                                                                                                                               |      |
|-----------------------------------------------------------------------------------------------------------------------------------------------------------------------------------------------------------------------------|---------------------------------------------------------------------------------------------------------------------------------------------------------------------------------------------------------------------------------------------------------------------------------------------------------------------------------------------------------------|------|
|                                                                                                                                                                                                                             | Symmans, F, Paoloni, M, Hylton, N, Hogarth, M, Lyandres, J, Perlmutter, J, Sanil, A, Yau, C, Esserman, L; Berry, D                                                                                                                                                                                                                                            |      |
| Effect of preoperative oral pravastatin reload in systemic inflammatory response and myocardial damage after coronary artery bypass grafting. A pilot double-blind placebo-controlled study                                 | Castañó, , M, González-Santos, JM, López, J, García, B, Centeno, JE, Aparicio, B, Bueno, MJ, Díez, R, Sagredo, V, Rodríguez, JM; García-Criado, FJ                                                                                                                                                                                                            | 2015 |
| Real-world data on clinical characteristics, prognosis and outcome of primary plasma cell leukemia: a study of the greek myeloma study group in the era of novel agents                                                     | Katodritou, , E, Terpos, E, Delimpasi, S, Kotsopoulou, M, Michalis, E, Kyrtsionis, M-C, Symeonidis, A, Giannakoulas, N, Vadiolia, C, Michael, M, Kalpadakis, C, Gougopoulou, T, Prokopiou, C, Kaiafa, GD, Christoulas, D, Gavriatopoulou, M, Giannopoulou, E, Lampropoulou, V, Verrou, E, Kastritis, E, Konstantinidou, P, Anagnostopoulos, A; Dimopoulos, MA | 2016 |
| Phase II trial of pertuzumab, trastuzumab, and nab-paclitaxel in patients (pts) with HER2 overexpressing (HER2+) locally advanced or inflammatory breast cancer (LABC) or untreated stage IV metastatic breast cancer (MBC) | Somlo, , G, Frankel, P, Yeon, C, Yuan, Y, Yim, J, Kruper, L, Taylor, L, Mortimer, J, Waisman, J, Jones, V, Vito, C, Paz, B, Huria, A, Li, D, Gaal, C, Tong, T; Tumyan, L                                                                                                                                                                                      | 2017 |
| Dexamethasone: benefit and prejudice for patients undergoing on-pump coronary artery bypass grafting: a study on myocardial, pulmonary, renal, intestinal, and hepatic injury                                               | Morariu, , AM, Loeff, BG, Aarts, LP, Rietman, GW, Rakhorst, G, van Oeveren, W; Epema, AH                                                                                                                                                                                                                                                                      | 2005 |
| Sleep-time blood pressure as a therapeutic target for cardiovascular risk reduction in type 2 diabetes                                                                                                                      | Hermida, , RC, Ayala, DE, Mojon, A; Fernandez, JR                                                                                                                                                                                                                                                                                                             | 2012 |
| Immunomodulatory effects of acupuncture in the treatment of allergic asthma                                                                                                                                                 | Joos, , S, Schott, C, Zou, H, Daniel, V, Martin, E; Brinkhaus, B                                                                                                                                                                                                                                                                                              | 1999 |
| Efficacy of brief behavioral counselling by allied health professionals to promote physical activity in people with peripheral arterial disease (BIPP): study protocol for a multi-center randomized controlled trial       | Burton, , NW, Ademi, Z, Best, S, Fiatarone Singh, MA, Jenkins, JS, Lawson, KD, Leicht, AS, Mavros, Y, Noble, Y, Norman, P, Norman, R, Parmenter, BJ, Pinchbeck, J, Reid, CM, Rowbotham, SE, Yip, L; Golledge, J                                                                                                                                               | 2016 |
| The beta agonist lung injury trial prevention. A randomized controlled trial                                                                                                                                                | Perkins, , GD, Gates, S, Park, D, Gao, F, Knox, C, Holloway, B, McAuley, DF, Ryan, J, Marzouk, J, Cooke, MW, Lamb, SE; Thickett, DR                                                                                                                                                                                                                           | 2014 |
| Next-generation sequencing-based detection of circulating tumour DNA After allogeneic stem cell transplantation for lymphoma                                                                                                | Herrera, , AF, Kim, HT, Kong, KA, Faham, M, Sun, H, Sohani, AR, Alyea, EP, Carlton, VE, Chen, YB, Cutler, CS, Ho, VT, Koreth, J, Kotwaliwale, C, Nikiforow, S, Ritz, J, Rodig, SJ, Soiffer, RJ, Antin, JH; Armand, P                                                                                                                                          | 2016 |
| Prospective randomized trial of ACUSEAL versus Vascu-Guard patching in carotid endarterectomy                                                                                                                               | Stone, , PA, AbuRahma, AF, Mousa, AY, Phang, D, Hass, SM, Modak, A; Dearing, D                                                                                                                                                                                                                                                                                | 2014 |
| Perineural invasion and lymph node involvement as indicators of surgical outcome and pattern of recurrence in the setting of preoperative gemcitabine-based chemoradiation therapy for resectable pancreatic cancer         | Takahashi, , H, Ohigashi, H, Ishikawa, O, Gotoh, K, Yamada, T, Nagata, S, Tomita, Y, Eguchi, H, Doki, Y; Yano, M                                                                                                                                                                                                                                              | 2012 |
| Effects of low-dose tamoxifen on breast cancer biomarkers Ki-67, estrogen and progesterone receptors                                                                                                                        | de Sousa, , JA, Facina, G, da Silva, BB; Gebrim, LH                                                                                                                                                                                                                                                                                                           | 2006 |
| Tumor necrosis factor-alpha blockade in recurrent and disabling chronic sciatica associated with post-operative peridural lumbar fibrosis: results of a two-year double-blind, randomized, controlled study                 | Nguyen, , C, Sanchez, K, Palazzo, C, Zee, N, Feydy, A, Quinquis, L, Grabar, S, Revel, M, Lefèvre-Colau, M-M, Poiraudreau, S; Rannou, F                                                                                                                                                                                                                        | 2015 |
| Oral steroids and doxycycline: two different approaches to treat nasal polyps                                                                                                                                               | Van Zele, , T, Gevaert, P, Holtappels, G, Beule, A, Wormald, PJ, Mayr, S, Hens, G, Hellings, P, Ebbens, FA, Fokkens, W, Van Cauwenberge, P; Bachert, C                                                                                                                                                                                                        | 2010 |
| Treatment of locally advanced pancreatic cancer by percutaneous and intraoperative irreversible electroporation: general hospital cancer center experience                                                                  | Lambert, , L, Horejs, J, Krska, Z, Hoskovec, D, Petruzella, L, Krechler, T, Kriz, P; Briza, J                                                                                                                                                                                                                                                                 | 2016 |
| Effects of high dose corticosteroids in open rhinoplasty                                                                                                                                                                    | Gürlek, , A, Fariz, A, Aydoğan, H, Ersöz-Oztürk, A; Evans, GR                                                                                                                                                                                                                                                                                                 | 2009 |
| Anesthetic type and risk of myocardial infarction after carotid endarterectomy in the Carotid Revascularization Endarterectomy versus Stenting Trial (CREST)                                                                | Hye, , RJ, Voeks, JH, Malas, MB, Tom, M, Longson, S, Blackshear, JL; Brott, TG                                                                                                                                                                                                                                                                                | 2016 |
| Effect of immunotherapy and spleen preservation on immunological function in patients with gastric cancer                                                                                                                   | Okinaga, , K, Iinuma, H, Kitamura, Y, Yokohata, T, Inaba, T; Fukushima, R                                                                                                                                                                                                                                                                                     | 2006 |
| Longitudinal and cross-sectional variability in markers of joint metabolism in patients with knee pain and articular cartilage abnormalities                                                                                | Lohmander, , LS, Dahlberg, L, Eyre, D, Lark, M, Thonar, EJ; Ryd, L                                                                                                                                                                                                                                                                                            | 1998 |
| Aged garlic extract improves endothelial function in men with coronary artery disease                                                                                                                                       | Williams, , MJ, Sutherland, WH, McCormick, MP, Yeoman, DJ; de Jong, SA                                                                                                                                                                                                                                                                                        | 2005 |
| Treatment of oral cavity and oropharynx squamous cell carcinoma with perilymphatic interleukin-2: clinical and pathologic correlations                                                                                      | De Stefani, , A, Valente, G, Forni, G, Lerda, W, Ragona, R; Cortesina, G                                                                                                                                                                                                                                                                                      | 1996 |
| Randomized trial of low-dose interleukin-2 vs. cyclosporine A and interferon-g after high dose chemotherapy with peripheral blood progenitor support in women with high risk primary breast cancer(HRPBC)                   | Cohen DJ Vahdat LT Zipin, D Lo KS Frederick D Donovan D Sharpe E Savage D Tiersten A Nichols G Troxel A Hesdorffer CS                                                                                                                                                                                                                                         | 2004 |
| Influence of cardiopulmonary bypass on the state of cognitive functions in patients with ischemic heart disease                                                                                                             | Buziashvili, , YI, Ambat'ello, SG, Aleksakhina, YA; Pashchenkov, MV                                                                                                                                                                                                                                                                                           | 2006 |
| The efficacy of the proteolytic medication longidaza in combined treatment of adhesions in patients with genital endometriosis                                                                                              | Yarmolinskaya, , MI, Selkov, SA, Manuilova, TYu, Bezhenar, VF, Rulev, VV, Seljutin, AV; Thazaplizheva, SSH                                                                                                                                                                                                                                                    | 2015 |
| Combined capecitabine and stereotactic ablative radiotherapy using EUS-guided fiducial placement for locally advanced pancreatic cancer: early experience in a tertiary centre                                              | Phan, , V-A, Nguyen, N, Le, H; Singhal, N                                                                                                                                                                                                                                                                                                                     | 2016 |
| Combined capecitabine and stereotactic ablative radiotherapy using EUS guided fiducial placement for locally advanced pancreatic cancer: early experience in a tertiary centre                                              | Phan, , VA, Le, H, Singhal, N; Nguyen, N                                                                                                                                                                                                                                                                                                                      | 2016 |

|                                                                                                                                                                                                                                                |                                                                                                                                                                                                                                |      |
|------------------------------------------------------------------------------------------------------------------------------------------------------------------------------------------------------------------------------------------------|--------------------------------------------------------------------------------------------------------------------------------------------------------------------------------------------------------------------------------|------|
| Effect of periodontal treatment on the clinical parameters of patients with rheumatoid arthritis: study protocol of the randomized, controlled ESPERA trial                                                                                    | Monsarrat, , P, Vergnes, JN, Cantagrel, A, Algans, N, Cousty, S, Kémoun, P, Bertrand, C, Arrivé, E, Bou, C, Sédarat, C, Schaevebeke, T, Nabet, C; Sixou, M                                                                     | 2013 |
| The periprocedural myocardial damage prevention during elective percutaneous coronary intervention as a result of pharmacological preconditioning with an oral form of nicorandil in patients with stable coronary artery disease. Pilot study | Gostishchev, , RV, Soboleva, GN, Samko, AN, Rogoza, AN; Minasyan, AA                                                                                                                                                           | 2018 |
| Aerobic exercise training reduces arterial stiffness in metabolic syndrome                                                                                                                                                                     | Donley, , DA, Fournier, SB, Reger, BL, DeVallance, E, Bonner, DE, Olfert, IM, Frisbee, JC; Chantler, PD                                                                                                                        | 2014 |
| Immunologic and clinical outcomes of vaccination with a multiepitope melanoma peptide vaccine plus low-dose interleukin-2 administered either concurrently or on a delayed schedule                                                            | Slingluff, , CL, Petroni, GR, Yamshchikov, GV, Hibbitts, S, Grosh, WW, Chianese-Bullock, KA, Bissonette, EA, Barnd, DL, Deacon, DH, Patterson, JW, Parekh, J, Neese, PY, Woodson, EM, Wiernasz, CJ; Merrill, P                 | 2004 |
| The effects of Crenotherapy and exercise in peripheral arterial occlusive disease. A comparison with simple exercise training                                                                                                                  | Quarto, , G, Amato, B, Serra, R, Benassai, G, Monti, MG, Salzano, A, D'Assante, R; Furino, E                                                                                                                                   | 2017 |
| Perioperative Simvastatin Therapy in Major Colorectal Surgery: a Prospective, Double-Blind Randomized Controlled Trial                                                                                                                         | Singh, , PP, Lemanu, DP, Soop, M, Bissett, IP, Harrison, J; Hill, AG                                                                                                                                                           | 2016 |
| Infliximab prevents Crohn's disease recurrence after ileal resection                                                                                                                                                                           | Regueiro, , M, Schraut, W, Baidoo, L, Kip, KE, Sepulveda, AR, Pesci, M, Harrison, J; Plevy, SE                                                                                                                                 | 2009 |
| Recombinant human soluble thrombomodulin for acute exacerbation of idiopathic pulmonary fibrosis: a historically controlled study                                                                                                              | Sakamoto, , S, Shimizu, H, Isshiki, T, Sugino, K, Kurosaki, A; Homma, S                                                                                                                                                        | 2018 |
| Does inchinkoto, a herbal medicine, have hepatoprotective effects in major hepatectomy? A prospective randomized study                                                                                                                         | Mizutani, , T, Yokoyama, Y, Kokuryo, T, Ebata, T, Igami, T, Sugawara, G; Nagino, M                                                                                                                                             | 2015 |
| The effect of intravenous vitamin C infusion on periprocedural myocardial injury for patients undergoing elective percutaneous coronary intervention                                                                                           | Wang, , ZJ, Hu, WK, Liu, YY, Shi, DM, Cheng, WJ, Guo, YH, Yang, Q, Zhao, YX; Zhou, YJ                                                                                                                                          | 2014 |
| Low preoperative hepcidin concentration as a risk factor for mortality after cardiac surgery: a pilot study                                                                                                                                    | Haase-Fielitz, , A, Plaß, M, Kuppe, H, Hetzer, R, Ostland, V, Westphal, S, Hoffmann, J, Prowle, J, Mertens, PR, Westerman, M, Bellomo, R; Haase, M                                                                             | 2013 |
| Diffuse large B-cell lymphoma: the relevance of gene expression profiling                                                                                                                                                                      | Pileri, , SA, Melle, F, Motta, G, Fabbri, M, Tabanelli, V, Calleri, A, Bruna, R, Derenzini, E, Corsini, C, Agostinelli, C, Cesano, A, Cortelazzo, S, Gianni, AM, Tarella, C, Rambaldi, A, Chiappella, A; Vitolo, U             | 2017 |
| Long-term follow-up of a prospective trial of intensified chemo-immunotherapy with autologous or allogeneic stem cell transplantation in patients affected by peripheral T-cell lymphoma                                                       | Corradini, , P, Vitolo, U, Rambaldi, A, Miceli, R, Patriarca, F, Gallamini, A, Benedetti, F, Todeschini, G, Rossi, G, Salvi, F, Bruno, B, Tarella, C, Pileri, S; Doderio, A                                                    | 2017 |
| Humoral rejection in kidney transplantation: new concepts in diagnosis and treatment                                                                                                                                                           | Mauiyyedi, , S; Colvin, RB                                                                                                                                                                                                     | 2002 |
| Cardiotomy suction, but not open venous reservoirs, activates coagulofibrinolysis in coronary artery surgery                                                                                                                                   | Nakahira, , A, Sasaki, Y, Hirai, H, Matsuo, M, Morisaki, A, Suehiro, S; Shibata, T                                                                                                                                             | 2011 |
| Alpha lipoic acid attenuates inflammatory response during extracorporeal circulation                                                                                                                                                           | Uyar, , IS, Onal, S, Akpınar, MB, Gonen, I, Sahin, V, Uguz, AC; Burma, O                                                                                                                                                       | 2013 |
| Role of Antioxidants Supplementation in Chronic Pancreatitis                                                                                                                                                                                   | NCT00319358                                                                                                                                                                                                                    | 2006 |
| Demonstration and operative influence of low prime volume closed pump                                                                                                                                                                          | Takai, , H, Eishi, K, Yamachika, S, Hazama, S, Ariyoshi, T; Nishi, K                                                                                                                                                           | 2005 |
| Effect of Daikenchuto, a Traditional Japanese Herbal Medicine, after Total Gastrectomy for Gastric Cancer: a Multicenter, Randomized, Double-Blind, Placebo-Controlled, Phase II Trial                                                         | Yoshikawa, , K, Shimada, M, Wakabayashi, G, Ishida, K, Kaiho, T, Kitagawa, Y, Sakamoto, J, Shiraishi, N, Koeda, K, Mochiki, E, Saikawa, Y, Yamaguchi, K, Watanabe, M, Morita, S, Kitano, S, Saji, S, Kanematsu, T; Kitajima, M | 2015 |
| Vertical Sleeve Gastrectomy and Lifestyle Modification for the Treatment of Non-Alcoholic Steatohepatitis                                                                                                                                      | NCT03587831                                                                                                                                                                                                                    | 2018 |
| The Post-Anaesthesia N-acetylcysteine Cognitive Evaluation (PANACEA) trial: study protocol for a randomised controlled trial                                                                                                                   | Skvarc, , DR, Dean, OM, Byrne, LK, Gray, LJ, Ives, K, Lane, SE, Lewis, M, Osborne, C, Page, R, Stupart, D, Turner, A, Berk, M; Marriott, AJ                                                                                    | 2016 |
| Effects of tofacitinib on lymphocytes in rheumatoid arthritis: relation to efficacy and infectious adverse events                                                                                                                              | Sonomoto, , K, Yamaoka, K, Kubo, S, Hirata, S, Fukuyo, S, Maeshima, K, Suzuki, K, Saito, K; Tanaka, Y                                                                                                                          | 2014 |
| Pimecrolimus cream in the long-term management of atopic dermatitis in adults: a six-month study                                                                                                                                               | Meurer, , M, Fölster-Holst, R, Wozel, G, Weidinger, G, Jünger, M; Bräutigam, M                                                                                                                                                 | 2002 |
| Pharmacological prevention of the deleterious effects of cardiopulmonary bypass                                                                                                                                                                | Hassantash, , SA, Omrani, GR, Givtaj, N; Afrakhteh, M                                                                                                                                                                          | 2007 |
| Inhibition of inflammation mediates the protective effect of atorvastatin reload in patients with coronary artery disease undergoing noncardiac emergency surgery                                                                              | Qu, , Y, Wei, L; Zhang, H                                                                                                                                                                                                      | 2014 |
| Noninvasive markers of liver fibrosis: on-treatment changes of serum markers predict the outcome of antifibrotic therapy                                                                                                                       | Tanwar, , S, Trembling, PM, Hogan, BJ, Srivastava, A, Parkes, J, Harris, S, Grant, P, Nastouli, E, Ocker, M, Wehr, K, Herold, C, Neureiter, D, Schuppan, D; Rosenberg, WM                                                      | 2017 |
| Intravenous immunoglobulin for ANCA-associated systemic vasculitis with persistent disease activity                                                                                                                                            | Jayne, , DR, Chapel, H, Adu, D, Misbah, S, O'Donoghue, D, Scott, D; Lockwood, CM                                                                                                                                               | 2000 |
| Randomized controlled trial of preoperative oral carbohydrate treatment in major abdominal surgery                                                                                                                                             | Mathur, , S, Plank, LD, McCall, JL, Shapkov, P, McIlroy, K, Gillanders, LK, Merrie, AE, Torrie, JJ, Pugh, F, Koca, JB, Bissett, IP; Parry, BR                                                                                  | 2010 |
| Late remote ischemic preconditioning in children undergoing cardiopulmonary bypass: a randomized controlled trial                                                                                                                              | Pavione, , MA, Carmona, F, de Castro, M; Carlotti, AP                                                                                                                                                                          | 2012 |
| Rectal administration of Lactobacillus casei DG modifies flora composition and Toll-like receptor expression in colonic mucosa of patients with mild ulcerative colitis                                                                        | D'Inca, , R, Barollo, M, Scarpa, M, Grillo, AR, Brun, P, Vettorato, MG, Castagliuolo, I; Sturniolo, GC                                                                                                                         | 2011 |

|                                                                                                                                                                                                                                                                                         |                                                                                                                      |      |
|-----------------------------------------------------------------------------------------------------------------------------------------------------------------------------------------------------------------------------------------------------------------------------------------|----------------------------------------------------------------------------------------------------------------------|------|
| Systemic inflammatory response related to cardiopulmonary bypass and its modification by methyl prednisolone: high dose versus low dose                                                                                                                                                 | Varan, , B, Tokel, K, Mercan, S, Dönmez, A; Aslamaci, S                                                              | 2002 |
| The role of parenteral glutamine supplement for surgical patient perioperatively: result of a single center, prospective and controlled study                                                                                                                                           | Yeh, , CN, Lee, HL, Liu, YY, Chiang, KC, Hwang, TL, Jan, YY; Chen, MF                                                | 2008 |
| Decreasing asleep ambulatory blood pressure reduces cardiovascular risk in chronic kidney disease                                                                                                                                                                                       | Hermida, , RC, Ayala, DE, Mojon, A; Fernandez, JR                                                                    | 2012 |
| Lack of renal protection of ultrafiltration during cardiac surgery: a randomized clinical trial                                                                                                                                                                                         | Foroughi, , M, Argani, H, Hassntash, SA, Hekmat, M, Majidi, M, Beheshti, M, Mehdizadeh, B; Yekani, B                 | 2014 |
| Phase-II randomized study of preoperative IL-2 administration in radically operable gastric cancer patients                                                                                                                                                                             | Romano, , F, Piacentini, MG, Franciosi, C, Caprotti, R, De Fina, S, Cesana, G, Uggeri, F, Conti, M; Uggeri, F        | 2004 |
| Health Benefits of HIT for Breast Cancer Patients                                                                                                                                                                                                                                       | NCT03176888                                                                                                          | 2017 |
| A study to assess if a new antiviral drug called FF-3 is safe and can protect healthy volunteers against infection with a type of flu virus                                                                                                                                             | EUCTR2015-001103-31-GB                                                                                               | 2015 |
| An early phase clinical study to investigate the combination of chemotherapy (Gemcitabine) and the study drug Atu027 in patients with advanced or metastatic pancreas cancer                                                                                                            | EUCTR2012-004429-26-DE                                                                                               | 2012 |
| Femoral-Express-I - FemExp-I                                                                                                                                                                                                                                                            | EUCTR2009-012676-27-SE                                                                                               | 2009 |
| Peripheral artery disease, biomarkers, and darapladib                                                                                                                                                                                                                                   | Berger, , JS, Ballantyne, CM, Davidson, MH, Johnson, JL, Tarka, EA, Lawrence, D, Trivedi, T, Zalewski, A; Mohler, ER | 2011 |
| Roflumilast and cognition in memory-impaired elderly                                                                                                                                                                                                                                    | ISRCTN96013814                                                                                                       | 2017 |
| Study of efficacy of ibuprofen vaginal solution                                                                                                                                                                                                                                         | EUCTR2018-001143-32-GR                                                                                               | 2018 |
| Clinical efficacy and mechanistic evaluation of Eplerenone for central serous chorio-retinopathy – the VICI randomised trial                                                                                                                                                            | ISRCTN92746680                                                                                                       | 2016 |
| Periodontal treatment and reduction of vascular inflammation in patients with peripheral arterial disease                                                                                                                                                                               | DRKS00004554                                                                                                         | 2012 |
| A Multi-Centre, Placebo-Controlled Phase II Study of Canakinumab for the Treatment of Adult-onset Still's disease (AOSD) including an open-label long term extension                                                                                                                    | EUCTR2011-001027-20-DE                                                                                               | 2011 |
| A Randomised Phase II Study Evaluating Cediranib vs. Cediranib and Saracatinib in patients with relapsed metastatic clear cell renal cancer - COSAK                                                                                                                                     | EUCTR2009-018014-20-GB                                                                                               | 2010 |
| A multicentre randomised double-blind placebo-controlled study comparing two regimens of combination induction therapy in early disease-modifying anti-rheumatic drug naïve rheumatoid arthritis                                                                                        | ISRCTN48638981                                                                                                       | 2007 |
| A single center, randomized, double-blind, placebo-controlled 2-way crossover study to investigate the mechanism of action of etoricoxib in subjects with osteoarthritis knee pain                                                                                                      | EUCTR2011-004179-35-DK                                                                                               | 2011 |
| CORAL: cancer of the OvaRy Abiraterone trial                                                                                                                                                                                                                                            | ISRCTN63407050                                                                                                       | 2013 |
| Scaling effect on 2 salivary factors in patients with gingival inflammation                                                                                                                                                                                                             | IRCT2016053025649N5                                                                                                  | 2016 |
| A PHASE 1B DOSE ESCALATION/PHASE 2 RANDOMIZED, NON-COMPARATIVE, MULTIPLE CENTER, OPEN LABEL STUDY OF CP-751,871 IN COMBINATION WITH PACLITAXEL AND CARBOPLATIN AND OF PACLITAXEL AND CARBOPLATIN ALONE AS FIRST LINE TREATMENT FOR ADVANCED NON SMAL CELL LUNG CANCER                   | EUCTR2005-002249-38-ES                                                                                               | 2005 |
| Effects of Tibolone on cardiovascular disease in menopausal women                                                                                                                                                                                                                       | IRCT138901293743N1                                                                                                   | 2010 |
| Multicenter, explorative phase II study of perioperative 5-FU, leucovorin, docetaxel, and oxaliplatin (FLOT) in combination with Trastuzumab in patients with HER2-positive, locally advanced resectable adenocarcinoma of the gastroesophageal junction or stomach (HerFLOT) - HerFLOT | EUCTR2011-001507-13-DE                                                                                               | 2011 |
| Globifer Forte in Heart Failure (GLOBIFER HF)                                                                                                                                                                                                                                           | EUCTR2013-004704-19-GB                                                                                               | 2015 |
| A Clinical Trial to test the effect of Carboplatin and Paclitaxel, with or without Debio 1143 in patients with newly diagnosed Advanced Epithelial Ovarian Cancer                                                                                                                       | EUCTR2015-005137-42-BE                                                                                               | 2016 |
| Targeting the rheumatoid arthritis synovial fibroblast via cyclin dependent kinase inhibition - an early phase trial                                                                                                                                                                    | ISRCTN36667085                                                                                                       | 2014 |
| Examination of the effectiveness of early diagnosis and treatment performed by magnetic resonance imaging (MRI) of hepatocellular carcinoma with liver specific contrast agent                                                                                                          | JPRN-UMIN000009830                                                                                                   | 2013 |
| A Study with a product called Multikine used in treatment of Mouth Cancer                                                                                                                                                                                                               | EUCTR2010-019952-35-HU                                                                                               | 2010 |
| Rifaximin tablets in the prevention of recurrent acute diverticulitis and diverticular complications                                                                                                                                                                                    | EUCTR2017-002708-28-DE                                                                                               | 2017 |
| A validity inspection study of the treat-to-target strategy with golimumab for the treatment of rheumatoid arthritis patient                                                                                                                                                            | JPRN-UMIN000009425                                                                                                   | 2012 |
| Repurposing anti-TNF for treating Dupuytren's disease                                                                                                                                                                                                                                   | EUCTR2015-001780-40-GB                                                                                               | 2015 |
| A Prospective, Single-centre, Randomised Study Evaluating the Clinical, Imaging and Immunological Depth of Remission Achieved by Very Early versus Delayed Etanercept in patients with Rheumatoid Arthritis                                                                             | EUCTR2010-023910-30-GB                                                                                               | 2011 |

|                                                                                                                                                                                                                                                                                                                                                                  |                                                                                                                          |      |
|------------------------------------------------------------------------------------------------------------------------------------------------------------------------------------------------------------------------------------------------------------------------------------------------------------------------------------------------------------------|--------------------------------------------------------------------------------------------------------------------------|------|
| (VEDERA) - Very Early versus Delayed Etanercept in patients with RA (VEDERA)                                                                                                                                                                                                                                                                                     |                                                                                                                          |      |
| The efficacy and mechanism of Imrecoxib in axial spondyloarthritis                                                                                                                                                                                                                                                                                               | ChiCTR-TRC-14004718                                                                                                      | 2014 |
| In this trial patients with newly diagnosed glioblastoma with an unmethylated MGMT-promoter are treated with targeted substances according to the results of a molecular and genomic characterization of their tumor tissue. One out of 8 drugs is given to the patient in combination with radiotherapy                                                         | EUCTR2015-002752-27-DE                                                                                                   | 2017 |
| Effect of antisecretory factor in ulcerative colitis on histological and laborative outcome: a short period clinical trial                                                                                                                                                                                                                                       | Eriksson, , A, Shafazand, M, Jennische, E; Lange, S                                                                      | 2003 |
| A randomized phase II trial comparing two different sequence combinations of autologous vaccine and human recombinant interferon gamma and human recombinant interferon alpha2B therapy in patients with metastatic renal cell carcinoma: clinical outcome and analysis of immunological parameters                                                              | Schwaab, , T, Heaney, JA, Schned, AR, Harris, RD, Cole, BF, Noelle, RJ, Phillips, DM, Stempkowski, L; Ernstoff, MS       | 2000 |
| The Oxford Marfan Trial                                                                                                                                                                                                                                                                                                                                          | EUCTR2010-023612-14-GB                                                                                                   | 2012 |
| Phase 2 study in patient with HER2-negative inflammatory breast cancer                                                                                                                                                                                                                                                                                           | EUCTR2016-001868-11-FR                                                                                                   | 2017 |
| A Study of Atezolizumab and Paclitaxel Versus Placebo and Paclitaxel in Participants With Previously Untreated Locally Advanced or Metastatic Triple Negative Breast Cancer (TNBC) (IMpassion131)                                                                                                                                                                | CTRI/2017/10/010010                                                                                                      | 2017 |
| Study of Abraxane® and gemcitabine followed by modified FOLFOX in patients with previously untreated, metastatic pancreatic adenocarcinoma                                                                                                                                                                                                                       | EUCTR2014-005350-19-ES                                                                                                   | 2015 |
| Clinical study on using the MEMS micro-needle to Promote penetration and Layers adjusting external application technique for treating end-stage knee osteoarthritis, based on the theory of pain as pivot and truncating and reversing                                                                                                                           | ChiCTR-IOR-17013361                                                                                                      | 2017 |
| A randomized, double-blind, placebo controlled, multicenter, phase II study of adding AMG 479, a fully human monoclonal antibody against insulin-like growth factor type 1 receptor (IGF-1R) to first line chemotherapy in patients with optimally debulked ( < 1cm) epithelial ovarian cancer                                                                   | EUCTR2008-001551-22-ES                                                                                                   | 2008 |
| A Phase III study where the treatment groups are assigned by chance and neither the patient or the study doctor know which treatment the patient will receive that will take place in many sites and will compare the efficacy of Retosiban with placebo in stopping spontaneous preterm labor and prolonging labor                                              | EUCTR2014-003326-41-GB                                                                                                   | 2015 |
| A Comparison of Prasugrel and Clopidogrel in Acute Coronary Syndrome (ACS) Subjects with Unstable Angina/Non-ST-Elevation Myocardial Infarction (UA/NSTEMI) Who are Medically Managed - The TRILOGY ACS Study - Trilogy ACS                                                                                                                                      | EUCTR2007-005210-39-PT                                                                                                   | 2008 |
| A study comparing standard therapy with or without TG4010 in patients with advanced non small cell lung cancer                                                                                                                                                                                                                                                   | EUCTR2011-001468-23-DE                                                                                                   | 2011 |
| Effect of soybean flour enriched bread consumption on inflammation, lipid profile, glycemic indices and Anthropometric indices                                                                                                                                                                                                                                   | IRCT2013061613684N1                                                                                                      | 2013 |
| Reumap: an Open Label phase II study of Bovine Intestinal Alkaline Phosphatase (bIAP), An Inflammation modulating moiety, in RA patients - REUMAP                                                                                                                                                                                                                | EUCTR2008-007346-63-GB                                                                                                   | 2010 |
| A 12-Week, Double-Blind, Randomized, Parallel Group, Placebo-Controlled Study of Two Doses of VX-702 in Subjects with Moderate to Severe Rheumatoid Arthritis - VeRA                                                                                                                                                                                             | EUCTR2005-000549-13-CZ                                                                                                   | 2005 |
| Prevention of recurrent narrowing of the esophagus after correction of esophageal atresia by injecting steroids                                                                                                                                                                                                                                                  | EUCTR2018-002863-24-NL                                                                                                   | 2018 |
| Evaluation of two preventive schemes of dental extraction with amoxicillin in patients with rheumatoid arthritis treated with tumor necrosis factor-alpha inhibitors (anti-TNF-?) and methotrexate                                                                                                                                                               | RBR-3kzp25                                                                                                               | 2015 |
| Effect of Multiple Doses of Oral Tranexamic Acid on Haemostasis and Inflammatory Reaction in Total Hip Arthroplasty: a Randomized Controlled Trial                                                                                                                                                                                                               | Wang, , D, Yang, Y, He, C, Luo, ZY, Pei, FX, Li, Q, Zhou, ZK; Zeng, WN                                                   | 2019 |
| Trial of pimasertib with SAR245409 or placebo in ovarian cancer                                                                                                                                                                                                                                                                                                  | EUCTR2013-000902-40-IT                                                                                                   | 2013 |
| A study to investigate the safety and effectiveness of a new anti cancer treatment - AZD5363 and assess its ability to affect levels of key proteins in cancer cells prior to the surgical removal of breast cancer                                                                                                                                              | EUCTR2012-005019-14-GB                                                                                                   | 2013 |
| Open label, prospective observational, multi-center trial in postmenopausal, hormone receptor positive breast cancer patients treated with either tamoxifen or an aromatase inhibitor. Examination of the predictive value of biological markers AEBS/mEH, active tamoxifen metabolites and TGF beta system for response and non response of tamoxifen treatment | DRKS00000605                                                                                                             | 2010 |
| pre-operative nivolumab, ipilimumab and COC2-inhibition in olon cancer (NICHE)                                                                                                                                                                                                                                                                                   | EUCTR2016-002940-17-NL                                                                                                   | 2016 |
| Renal, efficacy and safety outcomes following late conversion of kidney transplant patients from calcineurin inhibitor therapy to everolimus: the randomized APOLLO study                                                                                                                                                                                        | Budde, , K, Rath, T, Sommerer, C, Haller, H, Reinke, P, Witzke, O, Suwelack, B, Baeumer, D, May, C, Porstner, M; Arms, W | 2015 |
| AG-013736 (axitinib) for the treatment of metastatic renal cell cancer (mRCC) - Specific for Bulgaria only                                                                                                                                                                                                                                                       | EUCTR2010-018585-23-BG                                                                                                   | 2010 |

|                                                                                                                                                                                                                                                                                |                                                                                                                                                            |      |
|--------------------------------------------------------------------------------------------------------------------------------------------------------------------------------------------------------------------------------------------------------------------------------|------------------------------------------------------------------------------------------------------------------------------------------------------------|------|
| To estimate and compare a biomarker in saliva in gum disease patients with and without diabetes before and after treatment                                                                                                                                                     | CTRI/2018/03/012649                                                                                                                                        | 2018 |
| Toreforant, an orally active histamine H4-receptor antagonist, in patients with active rheumatoid arthritis despite methotrexate: mechanism of action results from a phase 2, multicenter, randomized, double-blind, placebo-controlled synovial biopsy study                  | Boyle, , DL, DePrimo, SE, Calderon, C, Chen, D, Dunford, PJ, Barchuk, W, Firestein, GS; Thurmond, RL                                                       | 2019 |
| Randomized clinical trial assessing the effect of Doppler-optimized fluid management on outcome after elective colorectal resection                                                                                                                                            | Noblett, , SE, Snowden, CP, Shenton, BK; Horgan, AF                                                                                                        | 2006 |
| The effect of melatonin supplementation in the treatment of type 2 diabetic patients                                                                                                                                                                                           | IRCT2017030831993N4                                                                                                                                        | 2017 |
| Clinical study aimed to assess in patients with triple-negative operable breast cancer the activity of the drug zoledronate administered before surgery, according to the the tumor aggressiveness (determined by the level of expression of the p53 protein)                  | EUCTR2014-004194-16-IT                                                                                                                                     | 2015 |
| Study for children with medulloblastoma of standard risk, between 3-5 years old and less than 22 years old                                                                                                                                                                     | EUCTR2011-004868-30-FR                                                                                                                                     | 2015 |
| A study to find out whether maraviroc given once daily is as effective as Truvada given once daily in treating HIV-infected patients never previously treated with maraviroc                                                                                                   | EUCTR2010-021785-30-FI                                                                                                                                     | 2011 |
| Feasibility study of radiofrequency endoscopic ablation, with ultrasound guidance, as a non-surgical, adrenal sparing treatment for aldosterone-producing adenomas                                                                                                             | ISRCTN86062633                                                                                                                                             | 2018 |
| Standard-Dose Combination Chemotherapy or High-Dose Combination Chemotherapy and Stem Cell Transplant in Treating Patients With Relapsed or Refractory Germ Cell Tumors                                                                                                        | ACTRN12618001236280                                                                                                                                        | 2018 |
| Efficacy and safety of a Double Icodextrin Dose in edarly patients, starting treatment by Continuous Ambulatory Peritoneal Dialysis (CAPD)                                                                                                                                     | EUCTR2011-005274-30-FR                                                                                                                                     | 2012 |
| Study to Evaluate the Safety and Efficacy of the MON4STRAT Approach for Optimizing Meropenem Therapy in Intubated and Mechanically-Ventilated, Adult Patients with Gram-Negative Lower Respiratory Tract Infection Including Nosocomial Pneumonia and Severe Tracheobronchitis | EUCTR2018-000450-21-ES                                                                                                                                     | 2018 |
| Clinical trial for the treatment of pulmonary alveolar proteinosis by inhalation of recombinant human granulocyte-macrophage colony stimulating factor (GM-CSF)                                                                                                                | ISRCTN18931678                                                                                                                                             | 2008 |
| TElmsartan in the management of abDominal aortic aneurYsm (TEDY)                                                                                                                                                                                                               | EUCTR2012-001859-39-NL                                                                                                                                     | 2012 |
| Abiraterone treatment for patients with relapsed ovarian cancer                                                                                                                                                                                                                | EUCTR2013-000293-29-GB                                                                                                                                     | 2013 |
| Effect of Propolis Extract on Chronic Periodontitis Patients                                                                                                                                                                                                                   | IRCT2016122030475N3                                                                                                                                        | 2017 |
| Study of relation between gum infection and pregnancy complications                                                                                                                                                                                                            | CTRI/2015/02/005581                                                                                                                                        | 2015 |
| Systemic Chemotherapy With or Without Intraperitoneal Chemohyperthermia in Treating Patients Undergoing Surgery for Peritoneal Carcinomatosis From Colorectal Cancer                                                                                                           | EUCTR2006-006175-20-ES                                                                                                                                     | 2012 |
| Atorvastatin and endothelial function in systemic lupus erythematosus (SLE) patients                                                                                                                                                                                           | ISRCTN19073445                                                                                                                                             | 2009 |
| Effect of root planning in microbiological, White blood cells,immunoglobulins and pro and anti inflammatory cytokines dosage in blood and saliva from periodontitis and type 2 diabet persons                                                                                  | RBR-6268zz                                                                                                                                                 | 2016 |
| Rifaximin tablets in the prevention of recurrent acute diverticulitis and diverticular complications                                                                                                                                                                           | EUCTR2017-002708-28-HU                                                                                                                                     | 2018 |
| Afatinib as Cancer therapy for Exocrine Pancreatic Tumours                                                                                                                                                                                                                     | EUCTR2011-004063-77-DE                                                                                                                                     | 2012 |
| Research on treatment strategies for adequate anitplatelet therapy for the prevention of major cardiac events after vascular surgery                                                                                                                                           | EUCTR2016-000686-23-NL                                                                                                                                     | 2016 |
| Cardioprotective Effects of Carvedilol in Inhibiting Doxorubicin-induced Cardiotoxicity                                                                                                                                                                                        | Nabati, , M, Janbabai, G, Baghyari, S, Esmaili, K; Yazdani, J                                                                                              | 2017 |
| Acupuncture and moxibustion as complementary therapy in Crohn's disease                                                                                                                                                                                                        | Joos, , S, Brinkhaus, B, Maluche, C, Maupai, N, Kohnen, R, Hahn, E; Schuppan, D                                                                            | 2005 |
| Inhibition of platelet function with clopidogrel is associated with a reduction of inflammation in patients with peripheral artery disease                                                                                                                                     | Meyer, , A, Weithaeuser, A, Steffens, D, Bobbert, P, Hassanein, A, Ayral, Y, Schultheiss, HP; Rauch, U                                                     | 2016 |
| Asthma control cost-utility randomized trial evaluation (ACCURATE): the goals of asthma treatment                                                                                                                                                                              | Honkoop, , PJ, Loymans, RJ, Termeer, EH, Snoeck-Stroband, JB, Bakker, MJ, Assendelft, WJ, Sterk, PJ, Ter Riet, G, Schermer, TR; Sont, JK                   | 2011 |
| Effect of long-term treatment with low-dose mifepristone on the endometrium                                                                                                                                                                                                    | Baird, , DT, Brown, A, Critchley, HOD, Williams, AR, Lin, S; Cheng, L                                                                                      | 2003 |
| Mallory-denk bodies are associated with outcomes and histologic features in patients with chronic hepatitis C                                                                                                                                                                  | Rakoski, , MO, Brown, MB, Fontana, RJ, Bonkovsky, HL, Brunt, EM, Goodman, ZD, Lok, AS; Omary, MB                                                           | 2011 |
| A randomized, double-blind study comparing tremelimumab to placebo in second and third line treatment of subjects with unresectable pleural or peritoneal mesothelioma                                                                                                         | Kindler, , HL, Di Pietro, A, Robbins, PB, Hong, S, Shalabi, A, Ibrahim, R, Calabro, L; Maio, M                                                             | 2013 |
| Bronchial hyperresponsiveness in asthmatic adults—a long-term correlation study                                                                                                                                                                                                | Carbone, , R, Luppi, F, Monselise, A; Bottino, G                                                                                                           | 2005 |
| Association of the bevacizumab pharmacokinetics with efficacy and toxicity in advanced non-squamous non-small cell lung cancer: kumamoto Thoracic Oncology Study Group (KTOSG) 1003 study                                                                                      | Saeki, , S, Sasaki, J, Sakata, S, Sato, R, Saruwatari, K, Sakamoto, Y, Inaba, M, Kishi, H, Fujii, S, Tsumura, S, Ouchi, M, Saito, H, Hamada, A; Kohrogi, H | 2017 |

|                                                                                                                                                                                                                                                                |                                                                                                                                                                                                                                                                                        |      |
|----------------------------------------------------------------------------------------------------------------------------------------------------------------------------------------------------------------------------------------------------------------|----------------------------------------------------------------------------------------------------------------------------------------------------------------------------------------------------------------------------------------------------------------------------------------|------|
| Effect of tart cherry juice on arterial stiffness, inflammation and other risk markers for cardiovascular disease in healthy adults                                                                                                                            | Lynn, , A, Mathew, S, Moore, CT, Russell, J, Robinson, E, Soumpasi, V; Barker, ME                                                                                                                                                                                                      | 2013 |
| The effects of remote ischaemic preconditioning on coronary artery function in patients with stable coronary artery disease                                                                                                                                    | Corcoran, , D, Young, R, Cialdella, P, McCartney, P, Bajrangee, A, Hennigan, B, Collison, D, Carrick, D, Shaukat, A, Good, R, Watkins, S, McEntegart, M, Watt, J, Welsh, P, Sattar, N, McConnachie, A, Oldroyd, KG; Berry, C                                                           | 2018 |
| Sulforaphane-rich broccoli sprout extract improves hepatic abnormalities in male subjects                                                                                                                                                                      | Kikuchi, , M, Ushida, Y, Shiozawa, H, Umeda, R, Tsuruya, K, Aoki, Y, Suganuma, H; Nishizaki, Y                                                                                                                                                                                         | 2015 |
| Effect of Mud-Bath Therapy on Serum Biomarkers in Patients with Knee Osteoarthritis: results from a Randomized Controlled Trial                                                                                                                                | Pascarelli, , NA, Cheleschi, S, Bacaro, G, Guidelli, GM, Galeazzi, M; Fioravanti, A                                                                                                                                                                                                    | 2016 |
| Rituximab Is Ineffective for Treatment of Fatigue in Primary Biliary Cholangitis: a Phase 2 Randomized Controlled Trial                                                                                                                                        | Khanna, , A, Jopson, L, Howel, D, Bryant, A, Blamire, A, Newton, JL; Jones, DE                                                                                                                                                                                                         | 2018 |
| The use of bone markers in a 6-week study to assess the efficacy of oral clodronate in patients with metastatic bone disease                                                                                                                                   | Brown, , JE, McCloskey, EV, Dewar, JA, Body, JJ, Cameron, DA, Harnett, AN, Ruutu, M, Purohit, OP, Tähtelä, R; Coleman, RE                                                                                                                                                              | 2007 |
| Randomized, double-blind, placebo-controlled study of tremelimumab for second-and third-line treatment of unresectable pleural or peritoneal mesothelioma                                                                                                      | Maio, , M, Scherpereel, A, Di Pietro, A, Vasey, P, Tsao, AS, Calabro, L, Fu, D, Robbins, PB, Ibrahim, RA; Kindler, HL                                                                                                                                                                  | 2014 |
| CD4+CD28-T-cell expansions in ANCA-associated vasculitis and association with arterial stiffness: baseline data from a randomised controlled trial                                                                                                             | Chanouzas, , D, Dyal, L, Dale, J, Moss, P, Morgan, M; Harper, L                                                                                                                                                                                                                        | 2015 |
| Effect of Omega-3 fatty acid supplementation on markers of platelet and endothelial function in patients with peripheral arterial disease                                                                                                                      | Mackay, , I, Ford, I, Thies, F, Fielding, S, Bachoo, P; Brittenden, J                                                                                                                                                                                                                  | 2012 |
| Preliminary safety and outcome report of the metronomic therapy from the Latin American osteosarcoma treatment protocol 2006                                                                                                                                   | Petrilli, , AS, Macedo, CR, Toledo, SRC, Pavoni-Ferreira, PC, Grings, M, Scopinaro, M, Ferman, S, Boldrini, E, A Almeida MT, , De Oliveira, CT, Rey, GL, Castillo, LA, Borsato, ML, Barreto, JH, L Morais VL, , Brunetto, AL; Lustosa, D                                               | 2011 |
| Multicentric Randomized Study of H. Pylori Eradication and Pepsinogen Testing for Prevention of Gastric Cancer Mortality                                                                                                                                       | NCT02047994                                                                                                                                                                                                                                                                            | 2014 |
| Beneficial effects of ramipril on myocardial diastolic function in patients with type 2 diabetes mellitus, normal LV systolic function and without coronary artery disease: a prospective study using tissue Doppler                                           | Siegmund, , T, Schumm-Draeger, PM, Antoni, D; Bibra, HV                                                                                                                                                                                                                                | 2007 |
| Evaluation of step up therapy in patients with early ulcerative colitis: a prospective cohort study                                                                                                                                                            | Bossuyt, , P, Baert, F, Coenegrachts, J-L, De Vos, M, Dewit, O, Ferrante, M, Fontaine, F, Mana, F, Vandervoort, J; Moreels, T                                                                                                                                                          | 2017 |
| Community-based scheduled screening and treatment of malaria in pregnancy for improved maternal and infant health in The Gambia, Burkina Faso and Benin: study protocol for a randomized controlled trial                                                      | Scott, , S, Mens, PF, Tinto, H, Nahum, A, Ruizendaal, E, Pagnoni, F, Grietens, KP, Kendall, L, Bojang, K, Schallig, H; D'Alessandro, U                                                                                                                                                 | 2014 |
| The effect of a periodontal intervention on cardiovascular risk markers in Indigenous Australians with periodontal disease: the PerioCardio study                                                                                                              | Skilton, , MR, Maple-Brown, LJ, Kapellas, K, Celermajer, DS, Bartold, M, Brown, A, O'Dea, K, Slade, GD; Jamieson, LM                                                                                                                                                                   | 2011 |
| A clinical study of adefovir dipivoxil treatment for chronic hepatitis patients with cirrhosis in their decompensation period                                                                                                                                  | Yang, , Q, Gong, ZJ; Hu, DF                                                                                                                                                                                                                                                            | 2009 |
| N-Acetylcysteine and Milk Thistle for Treatment of Diabetic Nephropathy                                                                                                                                                                                        | NCT01265563                                                                                                                                                                                                                                                                            | 2010 |
| Impact of oral ibandronate 150 mg once monthly on bone structure and density in post-menopausal osteoporosis or osteopenia derived from in vivo $\mu$ CT                                                                                                       | Bock, , O, Börst, H, Beller, G, Armbrrecht, G, Degner, C, Martus, P, Roth, HJ; Felsenberg, D                                                                                                                                                                                           | 2012 |
| Phase II trial of mapatumumab, a fully human agonist monoclonal antibody to tumor necrosis factor-related apoptosis-inducing ligand receptor 1 (TRAIL-R1), in combination with paclitaxel and carboplatin in patients with advanced non-small-cell lung cancer | von Pawel, , J, Harvey, JH, Spigel, DR, Dediu, M, Reck, M, Cebotaru, CL, Humphreys, RC, Gribbin, MJ, Fox, NL; Camidge, DR                                                                                                                                                              | 2014 |
| Levels of NT-proBNP, markers of low-grade inflammation, and endothelial dysfunction during spironolactone treatment in patients with diabetic kidney disease                                                                                                   | Nielsen, , SE, Schjoedt, KJ, Rossing, K, Persson, F, Schalkwijk, CG, Stehouwer, CD, Parving, HH; Rossing, P                                                                                                                                                                            | 2013 |
| Effect of pioglitazone versus metformin on cardiovascular risk markers in type 2 diabetes                                                                                                                                                                      | Genovese, , S, De Berardis, G, Nicolucci, A, Mannucci, E, Evangelista, V, Totani, L, Pellegrini, F; Ceriello, A                                                                                                                                                                        | 2013 |
| Mediation by patient-reported outcomes on the association between film-coated versus dispersible formulations of deferasirox and serum ferritin reduction: a post hoc analysis of the eclipse trial                                                            | Taher, , AT, Origa, R, Perrotta, S, Kouraklis, A, Belhou, K, Huang, V, Han, J, Bruederle, A, Bobbili, P, Duh, MS; Porter, JB                                                                                                                                                           | 2017 |
| The efficacy of antithrombin administration in the acute phase of burn injury                                                                                                                                                                                  | Lavrentieva, , A, Kontakiotis, T, Bitzani, M, Parlapani, A, Thomareis, O, Scourtis, H, Tsotsolis, N, Lazaridis, L; Giala, MA                                                                                                                                                           | 2008 |
| Anti-inflammatory treatment of depression: study protocol for a randomised controlled trial of vortioxetine augmented with celecoxib or placebo                                                                                                                | Fourrier, , C, Sampson, E, Mills, NT; Baune, BT                                                                                                                                                                                                                                        | 2018 |
| Antibiotic treatment In patients with chronic low back pain and Modic changes (the AIM study): study protocol for a randomised controlled trial                                                                                                                | Storheim, , K, Espeland, A, Grovle, L, Skouen, JS, Assmus, J, Anke, A, Froholdt, A, Pedersen, LM, Haugen, AJ, Fors, T, Schistad, E, Lutro, O, Marchand, GH, Kadar, T, Vetti, N, Randen, S, Nygaard, P, Brox, JI, Grotle, M; Zwart, J-A                                                 | 2017 |
| Influence of Treatment With Olanzapine or Ziprasidone on Transcapillary Glucose Transport in Human Skeletal Muscle                                                                                                                                             | NCT00297960                                                                                                                                                                                                                                                                            | 2006 |
| Body composition is improved during 12 months' treatment with metformin alone or combined with oral contraceptives compared with treatment with oral contraceptives in polycystic ovary syndrome                                                               | Glintborg, , D, Altinok, ML, Mumm, H, Hermann, AP, Ravn, P; Andersen, M                                                                                                                                                                                                                | 2014 |
| Phase 1/2 study of cyclin-dependent kinase (CDK)4/6 inhibitor palbociclib (PD-0332991) with bortezomib and dexamethasone in relapsed/refractory multiple myeloma                                                                                               | Niesvizky, , R, Badros, AZ, Costa, LJ, Ely, SA, Singhal, SB, Stadmauer, EA, Haideri, NA, Yacoub, A, Hess, G, Lentzsch, S, Spicka, I, Chanan-Khan, AA, Raab, MS, Tarantolo, S, Vij, R, Zonder, JA, Jayabalan, D, Di Liberto, M, Huang, X, Jiang, Y, Kim, ST, Randolph, S; Chen-Kiang, S | 2015 |
| Acupuncture and moxibustion in the treatment of active Crohn's disease: a randomized controlled study                                                                                                                                                          | Joos, , S, Brinkhaus, B, Maluche, C, Maupai, N, Kohnen, R, Kraehmer, N, Hahn, EG; Schuppan, D                                                                                                                                                                                          | 2004 |

|                                                                                                                                                                                                                 |                                                                                                                                                                                                                                              |      |
|-----------------------------------------------------------------------------------------------------------------------------------------------------------------------------------------------------------------|----------------------------------------------------------------------------------------------------------------------------------------------------------------------------------------------------------------------------------------------|------|
| Analysis of surrogate gene expression markers in peripheral blood of melanoma patients to predict treatment outcome of adjuvant pegylated interferon alpha 2b (EORTC 18991 side study)                          | Busse, , A, Rapon, J, Fusi, A, Suci, S, Nonnenmacher, A, Santinami, M, Kruit, WH, Testori, A, Punt, CJ, Dalglish, AG, Spatz, A, Eggermont, AM; Keilholz, U                                                                                   | 2013 |
| Total lymphoid irradiation in multiple sclerosis                                                                                                                                                                | Wiles, , CM, Omar, L, Swan, AV, Sawle, G, Frankel, J, Grunewald, R, Joannides, T, Jones, P, Laing, H; Richardson, PH                                                                                                                         | 1994 |
| Blood Chromogranin A is Not Effective as a Biomarker for Diagnosis or Management of Bronchopulmonary NET/NET                                                                                                    | Matar, , S, Malczewska, A, Oberg, K, Bodei, L, Aslanian, H, Lewczuk-Myslicka, A, Filosso, PL, Suarez, AL, Kolasinska-Cwikla, A, Roffinella, M, Kos-Kudla, B, Cwikla, JB, Drozdov, IA, Kidd, M; Modlin, IM                                    | 2019 |
| Why randomized controlled clinical trials do not depict accurately long-term outcomes in rheumatoid arthritis: some explanations and suggestions for future studies                                             | Pincus, , T; Stein, CM                                                                                                                                                                                                                       | 1997 |
| Statin-associated muscle symptoms in coronary patients: design of a randomized study                                                                                                                            | Munkhaugen, , J, Vethe, NT, Fagerland, MW, Dammen, T, Perk, J, Gjertsen, E, Otterstad, JE, Gullestad, L, Bergan, S; Husebye, E                                                                                                               | 2019 |
| A double-blind, placebo-controlled randomized clinical trial of alpha-tocopherol (vitamin E) in the treatment of amyotrophic lateral sclerosis                                                                  | Desnuelle, , C, Dib, M, Garrel, C; Favier, A                                                                                                                                                                                                 | 2001 |
| Blood metabolism study on protection of residual renal function of hemodialysis patients by traditional Chinese medicine Kidney Flaccidity Compound                                                             | Hu, , QD, Wu, WH, Zeng, Y, Wen, J, Li, XJ, Pan, W, Zhang, MP, Hu, B, Lei, CY; Fan, J                                                                                                                                                         | 2018 |
| An Intensive Lifestyle Intervention Program in CKD (Move to Health 2)                                                                                                                                           | NCT02842957                                                                                                                                                                                                                                  | 2016 |
| Acupuncture and moxibustion in the treatment of ulcerative colitis: a randomized controlled study                                                                                                               | Joos, , S, Wildau, N, Kohnen, R, Szecsenyi, J, Schuppan, D, Willich, SN, Hahn, EG; Brinkhaus, B                                                                                                                                              | 2006 |
| Caplacizumab Treatment for Acquired Thrombotic Thrombocytopenic Purpura                                                                                                                                         | Scully, , M, Cataland, SR, Peyvandi, F, Coppo, P, Knöbl, P, Kremer Hovinga, JA, Metjian, A, de la Rubia, J, Pavenski, K, Callewaert, F, Biswas, D, De Winter, H; Zeldin, RK                                                                  | 2019 |
| A randomized, double blind, placebo-controlled trial of alendronate treatment for fibrous dysplasia of bone                                                                                                     | Boyce, , AM, Kelly, MH, Brillante, BA, Kushner, H, Wientroub, S, Riminucci, M, Bianco, P, Robey, PG; Collins, MT                                                                                                                             | 2014 |
| Treatment with ω-3 fatty acids reduces serum C-reactive protein concentration                                                                                                                                   | Muhammad, , KI, Morledge, T, Sachar, R, Zeldin, A, Wolski, K; Bhatt, DL                                                                                                                                                                      | 2011 |
| Mitochondrial DNA and RNA increase in peripheral blood mononuclear cells from HIV-1-infected patients randomized to receive stavudine-containing or stavudine-sparing combination therapy                       | Casula, , M, Weverling, GJ, Wit, FW, Timmermans, EC, Stek, M, Lange, JM; Reiss, P                                                                                                                                                            | 2005 |
| Metformin reduces serum mullerian-inhibiting substance levels in women with polycystic ovary syndrome after protracted treatment                                                                                | Fleming, , R, Harborne, L, MacLaughlin, DT, Ling, D, Norman, J, Sattar, N; Seifer, DB                                                                                                                                                        | 2005 |
| Effects of bayberry juice on inflammatory and apoptotic markers in young adults with features of non-alcoholic fatty liver disease                                                                              | Guo, , H, Zhong, R, Liu, Y, Jiang, X, Tang, X, Li, Z, Xia, M; Ling, W                                                                                                                                                                        | 2014 |
| Evaluation of Mangosteen juice blend on biomarkers of inflammation in obese subjects: a pilot, dose finding study                                                                                               | Udani, , JK, Singh, BB, Barrett, ML; Singh, VJ                                                                                                                                                                                               | 2009 |
| Pioglitazone improves fat distribution, the adipokine profile and hepatic insulin sensitivity in non-diabetic end-stage renal disease subjects on maintenance dialysis: a randomized cross-over pilot study     | Zanchi, , A, Tappy, L, Le, K-A, Bortolotti, M, Theumann, N, Halabi, G, Gauthier, T, Mathieu, C, Tremblay, S, Bertrand, PC, Burnier, M; Teta, D                                                                                               | 2014 |
| Trichuris suis ova therapy in relapsing multiple sclerosis is safe but without signals of beneficial effect                                                                                                     | Voldsgaard, , A, Bager, P, Garde, E, Åkeson, P, Leffers, AM, Madsen, CG, Kapel, C, Roepstorff, A, Thamsborg, SM, Melbye, M, Siebner, H, Søndergaard, HB, Sellebjerg, F; Sørensen, PS                                                         | 2015 |
| Quantitative mrd is prognostic for progression-free & overall survival in elderly patients receiving chlorambucil alone or with obinutuzumab/rituximab: a prospective analysis of the GCLLSG cl11 study         | Ritgen, , M, Langerak, A, Goede, V, Bahlo, J, Kluth, S, Fischer, K, Steurer, M, Trneny, M, Mulligan, S, Mey, U, Trunzer, K, Humphrey, K, Fingerle-Rowson, G, Stilgenbauer, S, Bottcher, S, Brüggemann, M, Hallek, M, Kneba, M; Van Dongen, J | 2016 |
| Antioxidant supplementation with or without B-group vitamins after acute ischemic stroke: a randomized controlled trial                                                                                         | Ullegaddi, , R, Powers, HJ; Gariballa, SE                                                                                                                                                                                                    | 2006 |
| Long-term individual shear rate therapy counterpulsation enhances plasma nitrite release in patients with PAD                                                                                                   | Brix, , M, Buschmann, EE, Zietzer, A, Jaurigue, JA, Li, L, Jungk, C, Buschmann, I, Janke, D; Hillmeister, P                                                                                                                                  | 2017 |
| Early Posttransplant Tryptophan Metabolism Predicts Long-term Outcome of Human Kidney Transplantation                                                                                                           | Vavrinova-Yaghi, , D, Seelen, MA, Kema, IP, Deelman, LE, van der Heuvel, MC, Breukelman, H, Van den Eynde, BJ, Henning, RH, van Goor, H; Sandovici, M                                                                                        | 2015 |
| The effect of a Mediterranean diet with adequate dairy foods on cardio-metabolic and cognitive health outcomes                                                                                                  | ACTRN12616000309482                                                                                                                                                                                                                          | 2016 |
| A double-blind, placebo-controlled randomized clinical trial of alpha-tocopherol (vitamin E) in the treatment of amyotrophic lateral sclerosis. ALS riluzole-tocopherol Study Group                             | Desnuelle, , C, Dib, M, Garrel, C; Favier, A                                                                                                                                                                                                 | 2001 |
| Prophylactic irradiation of para-aortic lymph nodes for patients with locally advanced cervical cancers with and without high CA9 expression (KROG 07-01): a randomized, open-label, multicenter, phase 2 trial | Kim, , JH, Kim, JY, Yoon, MS, Kim, YS, Lee, JH, Kim, HJ, Kim, H, Kim, YJ, Yoo, CW, Nam, BH, Kim, TH, Kim, SK, Kim, SH, Kang, S, Seo, SS, Lim, MC; Park, SY                                                                                   | 2016 |
| Effects of intermittent exposure to hyperbaric oxygen for the treatment of an acute soft tissue injury                                                                                                          | Babul, , S, Rhodes, EC, Taunton, JE; Lepawsky, M                                                                                                                                                                                             | 2003 |
| Prediction of clinical responders to treatment with dms0150 a toll-like receptor 9 agonist in therapy refractory ulcerative colitis patients                                                                    | Von Stein, , O Musch E Lofberg R Kuznetsov N; Von Stein, P                                                                                                                                                                                   | 2013 |
| Evaluating Genes in Sputum to Measure Drug Response in COPD                                                                                                                                                     | NCT00233051                                                                                                                                                                                                                                  | 2005 |
| Omega-3 fatty acids for indicated prevention: treatment results and pathomechanisms                                                                                                                             | Amminger, , GP, Harris, MS, McGorry, PD; Henry, LP                                                                                                                                                                                           | 2013 |
| Long-term benefit of sebelipase alfa over 76 weeks in children and adults with lysosomal acid lipase deficiency (LALD) ARISE                                                                                    | Burton, , BK, Marulkar, S, Friedman, M, Tripuraneni, R; Furuya, KN                                                                                                                                                                           | 2017 |
| Intracoronary nitrite suppresses the inflammatory response following primary percutaneous coronary intervention                                                                                                 | Jones, , DA, Khambata, RS, Andiapen, M, Rathod, KS, Mathur, A; Ahluwalia, A                                                                                                                                                                  | 2017 |
| Telomere length is an independent predictor of outcome after therapy in CLL: results from the UKCLL4 trial                                                                                                      | Parker, , A, Forster, J, Reichter, S, De Castro, DG, Catovsky, D; Oscier, D                                                                                                                                                                  | 2011 |

|                                                                                                                                                                                                                     |                                                                                                                                                                                                                                                   |      |
|---------------------------------------------------------------------------------------------------------------------------------------------------------------------------------------------------------------------|---------------------------------------------------------------------------------------------------------------------------------------------------------------------------------------------------------------------------------------------------|------|
| Viral Inception of Asthma: prospective Study From Infancy to School-age                                                                                                                                             | NCT00731575                                                                                                                                                                                                                                       | 2008 |
| Room-air resuscitation causes less damage to heart and kidney than 100% oxygen                                                                                                                                      | Vento, , M, Sastre, J, Asensi, MA; Viña, J                                                                                                                                                                                                        | 2005 |
| Effect of weight loss on the cardiovascular risk profile of obese patients with psoriasis                                                                                                                           | Jensen, , P, Zachariae, C, Christensen, R, Geiker, NR, Schaadt, BK, Stender, S, Astrup, A, Hansen, PR; Skov, L                                                                                                                                    | 2014 |
| Early Versus Late DC-cardioversion of Persistent Atrial Fibrillation. Effect on Atrial Remodeling,Inflammatory and Neurohumoral Markers and Recurrence of Atrial Fibrillation                                       | NCT01593150                                                                                                                                                                                                                                       | 2012 |
| The benefits of exercise training in interstitial lung disease: protocol for a multicentre randomised controlled trial                                                                                              | Dowman, , L, McDonald, CF, Hill, C, Lee, A, Barker, K, Boote, C, Glaspole, I, Goh, N, Southcott, A, Burge, A, Ndongo, R, Martin, A; Holland, AE                                                                                                   | 2013 |
| Autologous CD34+cell transplantation promotes angiogenesis in older adult patients with atherosclerotic ischemia: study protocol for a prospective, single-center, open-label, randomized controlled clinical trial | Zhou, , C-H, Xu, L-L, Hao, X-X, Sun, X-J, Guo, M-J; Liu, B                                                                                                                                                                                        | 2017 |
| Anamorelin for patients with cancer cachexia: an integrated analysis of two phase 2, randomised, placebo-controlled, double-blind trials                                                                            | Garcia, , JM, Boccia, RV, Graham, CD, Yan, Y, Duus, EM, Allen, S; Friend, J                                                                                                                                                                       | 2015 |
| Neurofeedback Treatment of Affective Instability in Premenstrual Dysphoric Disorder(PMDD)                                                                                                                           | NCT01945372                                                                                                                                                                                                                                       | 2013 |
| Kidney and Periodontal Disease Study                                                                                                                                                                                | NCT01802216                                                                                                                                                                                                                                       | 2013 |
| Monotherapy with Levetiracetam Versus Older AEDs: a Randomized Comparative Trial of Effects on Bone Health                                                                                                          | Hakami, , T, O'Brien, TJ, Petty, SJ, Sakellarides, M, Christie, J, Kantor, S, Todaro, M, Gorelik, A, Seibel, MJ, Yerra, R; Wark, JD                                                                                                               | 2016 |
| Nociceptive blink reflex habituation biofeedback in migraine                                                                                                                                                        | de Tommaso, , M; Delussi, M                                                                                                                                                                                                                       | 2017 |
| Short-term Curcuminoid Supplementation for Chronic Pulmonary Complications due to Sulfur Mustard Intoxication: positive Results of a Randomized Double-blind Placebo-controlled Trial                               | Panahi, , Y, Ghanei, M, Bashiri, S, Hajhashemi, A; Sahebkar, A                                                                                                                                                                                    | 2015 |
| Long-term benefit of sebelipase alfa over 100 weeks in children and adults with lysosomal acid lipase deficiency (arise study)                                                                                      | Burton, , BK, Feillet, F, Furuya, K, Friedman, M, Marulkar, S; Balwani, M                                                                                                                                                                         | 2017 |
| Periodontal Treatment and Metabolic Control in Type 2 Diabetic Patients                                                                                                                                             | NCT01291875                                                                                                                                                                                                                                       | 2011 |
| Varenicline for treatment of alcohol dependence: a randomized, placebo-controlled trial                                                                                                                             | de Bejczy, , A, Löf, E, Walther, L, Guterstam, J, Hammarberg, A, Asanovska, G, Franck, J, Isaksson, A; Söderpalm, B                                                                                                                               | 2015 |
| Long-term effects of metformin on endothelial function in type 2 diabetes: a randomized controlled trial                                                                                                            | de Jager, , J, Kooy, A, Schalkwijk, C, van der Kolk, J, Leher, P, Bets, D, Wulffélé, MG, Donker, AJ; Stehouwer, CD                                                                                                                                | 2014 |
| An increase in the absolute count of CD56dimCD16+CD69+ NK cells in the peripheral blood is associated with a poorer IVF treatment and pregnancy outcome                                                             | Thum, , MY, Bhaskaran, S, Abdalla, HI, Ford, B, Sumar, N, Shehata, H; Bansal, AS                                                                                                                                                                  | 2004 |
| Immune Correlates of GM-CSF and Melanoma Peptide Vaccination in a Randomized Trial for the Adjuvant Therapy of Resected High-Risk Melanoma (E4697)                                                                  | Butterfield, , LH, Zhao, F, Lee, S, Tarhini, AA, Margolin, KA, White, RL, Atkins, MB, Cohen, GI, Whiteside, TL, Kirkwood, JM; Lawson, DH                                                                                                          | 2017 |
| N-Acetylcysteine and Milk Thistle for Treatment of Diabetic Nephropathy                                                                                                                                             | NCT00915200                                                                                                                                                                                                                                       | 2009 |
| Dietary nitrate supplementation enhances exercise performance in peripheral arterial disease                                                                                                                        | Kenjale, , AA, Ham, KL, Stabler, T, Robbins, JL, Johnson, JL, Vanbruggen, M, Privette, G, Yim, E, Kraus, WE; Allen, JD                                                                                                                            | 2011 |
| A multiple dose study of AMG 811 (anti-IFN-gamma) in subjects with systemic lupus erythematosus and active nephritis                                                                                                | Martin, , DA, Amoura, Z, Romero-Diaz, J, Chong, YB, Sanchez-Guerrero, J, Chan, T, Arnold, GE, Damore, MA, Sohn, W, Chirmule, N, Chiu, K, Wang, C, Boedigheimer, M, Sullivan, BA, Welcher, A, Kotzin, B; Chung, JB                                 | 2015 |
| Neutrophil-Related Gene Expression and Low-Density Granulocytes Associated With Disease Activity and Response to Treatment in Antineutrophil Cytoplasmic Antibody-Associated Vasculitis                             | Grayson, , PC, Carmona-Rivera, C, Xu, L, Lim, N, Gao, Z, Asare, AL, Specks, U, Stone, JH, Seo, P, Spiera, RF, Langford, CA, Hoffman, GS, Kallenberg, CG, St Clair, EW, Tchao, NK, Ytterberg, SR, Phippard, DJ, Merkel, PA, Kaplan, MJ; Monach, PA | 2015 |
| A Trial of Ischemic Preconditioning in Raynaud's Phenomenon (RP)                                                                                                                                                    | NCT02506062                                                                                                                                                                                                                                       | 2015 |
| Metabolic modulation with perhexiline in chronic heart failure: a randomized, controlled trial of short-term use of a novel treatment                                                                               | Lee, , L, Campbell, R, Scheuermann-Freestone, M, Taylor, R, Gunaruwan, P, Williams, L, Ashrafian, H, Horowitz, J, Fraser, AG, Clarke, K; Frenneaux, M                                                                                             | 2005 |
| Effects of alpha-linolenic acid versus those of EPA/DHA on cardiovascular risk markers in healthy elderly subjects                                                                                                  | Goyens, , PL; Mensink, RP                                                                                                                                                                                                                         | 2006 |
| Analysis of Cytokine Levels in Tears and Clinical Correlations After Intense Pulsed Light Treating Meibomian Gland Dysfunction                                                                                      | Liu, , R, Rong, B, Tu, P, Tang, Y, Song, W, Toyos, R, Toyos, M; Yan, X                                                                                                                                                                            | 2017 |
| The effect of diet beverage intake on measures of diabetes control: a pilot study                                                                                                                                   | Odegaard, , A; Hirahatake, K                                                                                                                                                                                                                      | 2017 |
| Interferon trials in small cell lung cancer at one institution: a comparison of results obtained before and after initiation of systematic treatment trials using IFN-α in combination with other modalities        | Ruotsalainen, , TM; Mattson, K                                                                                                                                                                                                                    | 2002 |
| Continuous effectiveness of canakinumab treatment in Schnitzler's syndrome: a 4-year open-label multi-center study                                                                                                  | Krause, , K, Bonnekoh, H, Ellrich, A, Tsianakas, A, Wagner, N, Fischer, J; Maurer, M                                                                                                                                                              | 2019 |
| Research study of Ibrutinib in Combination with Venetoclax in patients with Mantle Cell Lymphoma                                                                                                                    | EUCTR2017-000129-12-NL                                                                                                                                                                                                                            | 2018 |
| Clinical study over a period of at least 6 months to an individualized strength and endurance training in COPD patients in Marburger                                                                                | DRKS00006842                                                                                                                                                                                                                                      | 2014 |
| Early physical activity intervention prevents decrease of bone strength in very low birth weight infants                                                                                                            | Litmanovitz, , I, Dolfen, T, Friedland, O, Arnon, S, Regev, R, Shaikin-Kestenbaum, R, Lis, M; Eliakim, A                                                                                                                                          | 2003 |



|                                                                                                                                                                                                                                                                       |                                                                                                                                                                                                                                                                                   |      |
|-----------------------------------------------------------------------------------------------------------------------------------------------------------------------------------------------------------------------------------------------------------------------|-----------------------------------------------------------------------------------------------------------------------------------------------------------------------------------------------------------------------------------------------------------------------------------|------|
| An open label, multicenter, non randomized phase II study to evaluate anti-tumor efficacy and safety of GM-CSF (sargramostim, Leukine®) associated with Rituximab (MabThera®) in patients with follicular non Hodgkin's lymphoma with no prior treatment - FL2008 RGM | EUCTR2007-005580-95-FR                                                                                                                                                                                                                                                            | 2008 |
| Insulin Independence Trial                                                                                                                                                                                                                                            | EUCTR2015-000105-39-ES                                                                                                                                                                                                                                                            | 2015 |
| A MULTICENTER OPEN LABEL PHASE II STUDY OF THE EFFICACY AND SAFETY OF AMG 479, A FULLY HUMAN MONOCLONAL ANTIBODY AGAINST INSULIN-LIKE GROWTH FACTOR TYPE 1 RECEPTOR (IGF-1R) AS SECOND LINE THERAPY IN PATIENTS WITH RECURRENT PLATINUMSENSITIVE OVARIAN CANCER       | EUCTR2008-001552-44-ES                                                                                                                                                                                                                                                            | 2008 |
| Vascular adhesion molecule-1 and markers of platelet function before and after a treatment with iloprost or a supervised physical exercise program in patients with peripheral arterial disease                                                                       | Arosio, , E, Minuz, P, Prior, M, Zuliani, V, Gaino, S, De Marchi, S, Fontana, L, Andrioli, G, Lechi, C; Lechi, A                                                                                                                                                                  | 2001 |
| A Clinical Trial for the comparison of Ticagrelor and Clopidogrel in Patients with Coronary Artery Disease                                                                                                                                                            | EUCTR2013-004376-35-GR                                                                                                                                                                                                                                                            | 2013 |
| A Phase IIb study to openly compare a group treated with only pegylated interferon alfa-2a (PEG-IFN) to an untreated group in children with chronic hepatitis B (CHB) who are HBsAg positive (a marker of their stage of CHB infection)                               | EUCTR2011-002732-70-IT                                                                                                                                                                                                                                                            | 2012 |
| TRON: a trial to examine the effectiveness of the study drug (Everolimus) in the treatment of cognitive problems experienced by patients with tuberous sclerosis                                                                                                      | EUCTR2011-004854-25-GB                                                                                                                                                                                                                                                            | 2011 |
| A Randomized Phase II Study to Determine Potential Predictive Markers of Response to MDX-010 BMS-734016 in Patients with Unresectable Stage III or IV Malignant Melanoma - ND                                                                                         | EUCTR2005-002126-64-IT                                                                                                                                                                                                                                                            | 2006 |
| The effect of long-term weight-loss intervention strategies on the dynamics of pancreatic-fat and morphology: an MRI RCT study                                                                                                                                        | Tene, , L, Shelef, I, Schwarzfuchs, D, Gepner, Y, Yaskolka Meir, A, Tsaban, G, Zelicha, H, Bilitzky, A, Komy, O, Cohen, N, Bril, N, Rein, M, Serfaty, D, Kenigsbuch, S, Chassidim, Y, Sarusy, B, Ceglarek, U, Stumvoll, M, Blüher, M, Thiery, J, Stampfer, MJ, Rudich, A; Shai, I | 2018 |
| Efficacy of mindfulness-based intervention (À mindfulness-based joyful sleep) in young and middle-aged individuals with insomnia using a biomarker of inflammatory responses: a prospective protocol of a randomised controlled trial in China                        | Pan, , C, Wang, X, Deng, Y, Li, P, Liao, Y, Ma, X, Yang, G-P, Dai, L; Tang, Q                                                                                                                                                                                                     | 2019 |
| A randomised, double-blind, placebo controlled study to assess the safety and the efficacy of neridronate 100 mg - 4 i.v. infusions in a course of 10 days treatment - in patients with algodystrophic syndrome. - ND                                                 | EUCTR2007-003372-18-IT                                                                                                                                                                                                                                                            | 2008 |
| Markers of bone in diabetics and the effect of bone treatment                                                                                                                                                                                                         | EUCTR2013-001222-26-DK                                                                                                                                                                                                                                                            | 2013 |
| The Effects of Inorganic Nitrite on skeletal muscle: physiology, Pharmacology and Therapeutic Potential in patients suffering from Intermittent Claudication                                                                                                          | EUCTR2012-000201-72-GB                                                                                                                                                                                                                                                            | 2012 |
| A randomized, double-blind, placebo controlled study to assess the safety and the efficacy of Neridronate ampoules 25 mg, after repeated intramuscular administrations, in patients with Complex Regional Pain Syndrome type I (CRPS-I)                               | EUCTR2014-001156-28-IT                                                                                                                                                                                                                                                            | 2014 |
| A Randomized, Multicenter, Open-Label, 3 Arm Phase 3 Study of Obinutuzumab in Combination with Chlorambucil, ACP 196 in Combination with Obinutuzumab, and ACP-196 Monotherapy in Subjects with Previously Untreated Chronic Lymphocytic Leukemia                     | EUCTR2014-005582-73-HU                                                                                                                                                                                                                                                            | 2015 |
| A Randomized, Multicenter, Open-Label, Non-Inferiority, Phase 3 Study of ACP-196 Versus Ibrutinib in Previously Treated Subjects with High Risk Chronic Lymphocytic Leukemia                                                                                          | EUCTR2014-005530-64-BE                                                                                                                                                                                                                                                            | 2015 |
| Clinical trial for assessing if genetic information obtained with NEUROFARMAGEN test is effective for selecting the treatment in patients with mental disorders                                                                                                       | EUCTR2013-002228-18-ES                                                                                                                                                                                                                                                            | 2013 |
| A PHASE 2 RANDOMIZED, DOUBLE-BLIND PLACEBO-CONTROLLED TRIAL OF MHAA4549A, A MONOCLONAL ANTIBODY, IN COMBINATION WITH OSELTAMIVIR VERSUS OSELTAMIVIR FOR TREATMENT OF SEVERE INFLUENZA A INFECTION                                                                     | PER-077-14                                                                                                                                                                                                                                                                        | 2015 |
| Dopamine transporter brain imaging to assess the effects of pramipexole vs levodopa on Parkinson disease progression                                                                                                                                                  |                                                                                                                                                                                                                                                                                   | 2002 |
| Phase 3 Study of Venetoclax and Dexamethasone Compared with Pomalidomide and Dexamethasone in Subjects with t(11;14)-Positive Relapsed or Refractory Multiple Myeloma                                                                                                 | EUCTR2017-003838-88-SE                                                                                                                                                                                                                                                            | 2018 |
| Effectiveness and safety evaluation of biomembrane hemicellulose versus curative collagenase in the treatment of chronic venous ulcers                                                                                                                                | RBR-2q5yjsx                                                                                                                                                                                                                                                                       | 2016 |
| EFFECT OF ADJUVANT TREATMENT WITH N - ACETYLCYSTEINE DURING 48 WEEKS ON THE LOSS OF GREY SUBSTANCE AND OXIDATIVE METABOLISM IN PATIENTS WITH EARLY ONSET PSYCHOTIC EPISODES: BLIND, PLACEBO-CONTROLLED, RANDOMIZED CLINICAL TRIAL                                     | EUCTR2012-005435-87-ES                                                                                                                                                                                                                                                            | 2012 |
| Study to evaluate 3 type of treatment (masitinib + FOLFIRI, or masitinib alone, or FOLFIRI alone) in the treatment of patients with metastatic colorectal cancer that have received 2 or 3 previous therapies                                                         | EUCTR2013-000493-30-SK                                                                                                                                                                                                                                                            | 2015 |

|                                                                                                                                                                                                                                                                                                              |                                                                                                                                                                                      |      |
|--------------------------------------------------------------------------------------------------------------------------------------------------------------------------------------------------------------------------------------------------------------------------------------------------------------|--------------------------------------------------------------------------------------------------------------------------------------------------------------------------------------|------|
| STUDY EVALUATING ALX-0061 ADMINISTERED SUBCUTANEOUSLY IN PATIENTS WITH SYSTEMIC LUPUS ERYTHEMATOSUS                                                                                                                                                                                                          | PER-048-15                                                                                                                                                                           | 2016 |
| A Randomized, Open-label, Multi-center, Phase 3, 2-arm Study Evaluating the Efficacy and Safety of Peg interferon Alfa-2b Low-dose Maintenance Monotherapy Versus Standard Supportive Care in Patients With Cirrhotic Hepatitis C Co-infected With Human Immunodeficiency Virus – The ENDURE Study. - ENDURE | EUCTR2005-003876-39-BE                                                                                                                                                               | 2006 |
| A Clinical trial to compare Acalabrutinib (ACP-196) versus investigator's choice standard treatment with Bendamustine/Rituximab or Idelalisib/Rituximab alone in patients with Relapsed or Refractory Chronic Lymphocytic Leukemia                                                                           | EUCTR2015-004454-17-FR                                                                                                                                                               | 2016 |
| The effect of therapeutic models of Traditional Persian Medicine and Electro-Acupuncture on Polycystic Ovarian Syndrome                                                                                                                                                                                      | IRCT2015040921671N1                                                                                                                                                                  | 2015 |
| A trial to test the effect of nintedanib together with chemotherapy in patients with acute myeloid leukemia                                                                                                                                                                                                  | EUCTR2011-001086-41-DE                                                                                                                                                               | 2011 |
| TRIAL TO EVALUATE CHEMOTHERAPY WITH CAPECITABINE OR CAPECITABINE PLUS MITOMYCIN C IN ADVANCED BILIARY TRACT CANCER                                                                                                                                                                                           | EUCTR2011-002002-70-IT                                                                                                                                                               | 2012 |
| Franciscus Reumatoide Artritis en Cardiovasculaire interventie studie                                                                                                                                                                                                                                        | NTR3873                                                                                                                                                                              | 2013 |
| Exploratory Clinical Trial to Investigate Safety and Efficacy of COMBOPROFEN for treatment of muscular pain associated with DOMS                                                                                                                                                                             | EUCTR2016-003139-39-ES                                                                                                                                                               | 2017 |
| NutriBrain: a controlled study to investigate the effect of a food supplement on brain development in very early born infants                                                                                                                                                                                | ISRCTN96620855                                                                                                                                                                       | 2017 |
| Safety and immunogenicity of a candidate tuberculosis (TB) vaccine in adults with TB disease                                                                                                                                                                                                                 | EUCTR2012-001820-36-EE                                                                                                                                                               | 2012 |
| Prospective, double-blind, randomised study of the efficacy of ketamine for oropharyngeal mucositis pain                                                                                                                                                                                                     | ACTRN12619000108112                                                                                                                                                                  | 2019 |
| Effect of SGLT2 inhibition on the function of small vessels of the heart in type 2 diabetes                                                                                                                                                                                                                  | EUCTR2017-000240-17-DK                                                                                                                                                               | 2017 |
| Effects of pulsed currents applied by cathode and anode in the treatment of category I pressure ulcers                                                                                                                                                                                                       | ACTRN12617001534370                                                                                                                                                                  | 2017 |
| A trial investigating different treatment plans of the medication nab-Paclitaxel, a chemotherapeutic agent in patients with breast cancer that has spread to other parts of the body                                                                                                                         | EUCTR2012-003058-10-IE                                                                                                                                                               | 2013 |
| A Phase I/II study to evaluate Trappsol Cyclo (hydroxypropyl-β-cyclodextrin) in patients with Niemann-Pick disease type C (NPC-1) to assess what the drug does to the body, and what the body does to the drug, and the side effects and benefits experienced by patients                                    | EUCTR2015-005761-23-GB                                                                                                                                                               | 2016 |
| Regulating intestinal microecologic health agent combination chemotherapy in the treatment of advanced colorectal cancer research                                                                                                                                                                            | ChiCTR-INR-17011221                                                                                                                                                                  | 2017 |
| Estimating the magnitude of clinical benefit of systemic therapy in patients with DCIS                                                                                                                                                                                                                       | Lazzeroni, M; De Censi, A                                                                                                                                                            | 2019 |
| Treating the gut flora to improve heart failure                                                                                                                                                                                                                                                              | EUCTR2015-000192-27-NO                                                                                                                                                               | 2015 |
| A short term open, randomized cross over trial trial exploring the effect of carbonic anhydrase inhibition by acetazolamide on sleep apnea associated hypertension                                                                                                                                           | EUCTR2013-004866-33-SE                                                                                                                                                               | 2014 |
| A Study to Assess Treatment Efficacy and Safety of Rifaximin DR Twice Daily in Subjects with Active Crohn's Disease for 52 weeks                                                                                                                                                                             | EUCTR2014-001645-24-PL                                                                                                                                                               | 2015 |
| Aprepitant – effect and safety in treatment of atopic dermatitis                                                                                                                                                                                                                                             | EUCTR2013-002029-40-SE                                                                                                                                                               | 2013 |
| Effects of dapagliflozin treatment on urinary proteomic patterns in patients with type 2 diabetes                                                                                                                                                                                                            | EUCTR2015-000335-32-DK                                                                                                                                                               | 2015 |
| Treatment of osteoporosis in patients with rheumatoid arthritis                                                                                                                                                                                                                                              | EUCTR2015-003638-28-DK                                                                                                                                                               | 2015 |
| A MULTICENTRE CLINICAL STUDY TO EVALUATE THE SAFETY AND EFFICACY OF LUM001, AN AGENT THAT INHIBITS BILE ACID REUPTAKE FROM THE INTESTINE, IN THE TREATMENT OF CHOLESTATIC LIVER DISEASE IN PAEDIATRIC PATIENTS WITH ALAGILLE SYNDROME                                                                        | EUCTR2013-003832-54-GB                                                                                                                                                               | 2013 |
| Test if adding Vitamin D, a safe standard vitamin supplement to steroid tablets, will improve the clinical response to steroids in patients who are considered to be steroid resistant                                                                                                                       | EUCTR2008-002244-42-GB                                                                                                                                                               | 2009 |
| Research study of Ibrutinib in Combination with Venetoclax in patients with Mantle Cell Lymphoma                                                                                                                                                                                                             | EUCTR2017-000129-12-HU                                                                                                                                                               | 2017 |
| A study in which patients with type 2 diabetes and who have been told they have a certain type of protein, albumin, in their urine, are given orally GKT137831 or placebo, no active, to determine whether GKT137831 has any effect in these patients and it is safe                                         | EUCTR2013-002507-34-CZ                                                                                                                                                               | 2013 |
| Phase II Randomized, Parallel-Group Trial on PTK-ZK with or without DTIC in Patients with non-resectable Metastatic Malignant Melanoma                                                                                                                                                                       | EUCTR2005-002192-32-DE                                                                                                                                                               | 2006 |
| Safety of Maraviroc in HIV-1 Infected Subjects Coinfected with Hepatitis B and/or Hepatitis C virus                                                                                                                                                                                                          | EUCTR2010-021994-35-CZ                                                                                                                                                               | 2011 |
| A Randomized, Double-Blind, Placebo-Controlled Phase II Study of the Efficacy and Safety of Monotherapy Ontuxizumab (MORAb-004) Plus                                                                                                                                                                         | Grothey, A, Strosberg, JR, Renfro, LA, Hurwitz, HI, Marshall, JL, Safran, H, Guarino, MJ, Kim, GP, Hecht, JR, Weil, SC, Heyburn, J, Wang, W, Schweizer, C, O'Shannessy, DJ; Diaz, LA | 2018 |

|                                                                                                                                                                                                                                                                                                                                                                                                                                                                                                                                                                                |                                                                                                                                                                          |      |
|--------------------------------------------------------------------------------------------------------------------------------------------------------------------------------------------------------------------------------------------------------------------------------------------------------------------------------------------------------------------------------------------------------------------------------------------------------------------------------------------------------------------------------------------------------------------------------|--------------------------------------------------------------------------------------------------------------------------------------------------------------------------|------|
| Best Supportive Care in Patients with Chemorefractory Metastatic Colorectal Cancer                                                                                                                                                                                                                                                                                                                                                                                                                                                                                             |                                                                                                                                                                          |      |
| Integrated Care for Atrial Fibrillation Management: a Randomised Controlled Trial                                                                                                                                                                                                                                                                                                                                                                                                                                                                                              | ACTRN12616001109493                                                                                                                                                      | 2016 |
| This is a clinical study to investigate how well Biostate works in treatment of male patients below the age of 12 years who have a clotting factor deficiency that is aggravated by the development of antibodies. The antibodies are directed against the clotting factor that is given for replacement therapy and usually make therapy unsuccessful. The treatment used in this study is called immune tolerance therapy                                                                                                                                                    | EUCTR2010-020113-85-AT                                                                                                                                                   | 2011 |
| N-Acetylcysteine in patients with Sickle Cell Disease: reducing the incidence of daily life pain in patients with sickle cell disease                                                                                                                                                                                                                                                                                                                                                                                                                                          | EUCTR2012-004892-37-NL                                                                                                                                                   | 2013 |
| Treatment of bile acid malabsorption with liraglutid                                                                                                                                                                                                                                                                                                                                                                                                                                                                                                                           | EUCTR2018-003575-34-DK                                                                                                                                                   | 2018 |
| Study to evaluate effect of MIN-102 compared to Placebo after 96 weeks of randomized, double-blind Treatment followed by open-label extension study to evaluate effect of long term treatment with MIN-102 on the progression of adrenomyeloneuropathy (AMN) in male patients                                                                                                                                                                                                                                                                                                  | EUCTR2017-000748-16-ES                                                                                                                                                   | 2017 |
| Study to evaluate the use of allogeneic mesenchymal stromal cells for the treatment of skin disease in children with recessive dystrophic epidermolysis bullosa                                                                                                                                                                                                                                                                                                                                                                                                                | ISRCTN46615946                                                                                                                                                           | 2012 |
| The analysis of the factors related to efficacy of asunaprevir and daclatasvir hydrochloride for hepatitis C-related liver disease                                                                                                                                                                                                                                                                                                                                                                                                                                             | JPRN-UMIN000016633                                                                                                                                                       | 2015 |
| A 2 year study to investigate belimumab in membranous nephropathy                                                                                                                                                                                                                                                                                                                                                                                                                                                                                                              | EUCTR2011-000242-38-ES                                                                                                                                                   | 2012 |
| Effect of Everolimus Initiation and Calcineurin Inhibitor Elimination on Cardiac Allograft Vasculopathy in De Novo Heart Transplant Recipients                                                                                                                                                                                                                                                                                                                                                                                                                                 | Arora, S, Andreassen, AK, Karason, K, Gustafsson, F, Eiskjær, H, Bøtker, HE, Rådegran, G, Gude, E, Ioanes, D, Solbu, D, Dellgren, G, Ueland, T, Aukrust, P, Gullestad, L | 2018 |
| PROXIMUS (PProtective role of OXcabazepine In Multiple Sclerosis)                                                                                                                                                                                                                                                                                                                                                                                                                                                                                                              | EUCTR2013-002419-87-GB                                                                                                                                                   | 2014 |
| Phase II trial for assessing different benznidazol regimens in the treatment of Chagas disease in adult patients on chronic phase . BERINECE project                                                                                                                                                                                                                                                                                                                                                                                                                           | EUCTR2016-003789-21-ES                                                                                                                                                   | 2016 |
| Obstructive sleep apnoea and retinal vasculature reactivity                                                                                                                                                                                                                                                                                                                                                                                                                                                                                                                    | ISRCTN78082983                                                                                                                                                           | 2014 |
| A Study to Assess Treatment Efficacy and Safety of Rifaximin DR Twice Daily in Subjects with Active Crohn's Disease for 52 weeks                                                                                                                                                                                                                                                                                                                                                                                                                                               | EUCTR2014-001644-38-HU                                                                                                                                                   | 2014 |
| Study of efficacy, safety and tolerability of ACZ885 (canakinumab) in pediatric and young adult patients with sickle cell anemia                                                                                                                                                                                                                                                                                                                                                                                                                                               | EUCTR2016-002101-19-GB                                                                                                                                                   | 2016 |
| Determination of efficacy and safety of azithromycin maintenance therapy for 6 months in subjects with primary ciliary dyskinesia                                                                                                                                                                                                                                                                                                                                                                                                                                              | EUCTR2013-004664-58-DE                                                                                                                                                   | 2014 |
| A Phase 3, Randomized, Double-Blind, Placebo-Controlled Study to Evaluate the Efficacy and Safety of AG-348 in Not Regularly Transfused Adult Subjects With Pyruvate Kinase Deficiency                                                                                                                                                                                                                                                                                                                                                                                         | EUCTR2017-003823-31-DK                                                                                                                                                   | 2018 |
| Effects of benfotiamine treatment over 12 months on variables of peripheral diabetic neuropathy                                                                                                                                                                                                                                                                                                                                                                                                                                                                                | EUCTR2013-001058-85-DE                                                                                                                                                   | 2013 |
| A Phase III Multicenter, Randomized, Double-Blind, placebo-controlled Study to Assess short-term changes in synovitis and structural damage outcomes in subjects with active Rheumatoid Arthritis and inadequate response to Methotrexate, Treated with Abatacept versus Placebo on a Background Therapy with Methotrexate Revised Protocol 03, incorporating Protocol Amendment 01 (Version 1.0, Date 16-May-2007), Protocol Amendment 03 (Version 1.0, Date 19-Mar-2008), Protocol Amendment 04 (Version 1.0, Date 05-Dec-2008), and Administrative Letter dated 13-Jun-2007 | EUCTR2006-003768-67-SE                                                                                                                                                   | 2007 |
| Effects of diet and omeprazole in patients with eosinophilic oesophagitis – a multi-centre, randomised controlled trial and investigation of novel disease mechanisms                                                                                                                                                                                                                                                                                                                                                                                                          | ACTRN12613001210763                                                                                                                                                      | 2013 |
| The purpose of this study is to evaluate a drug (LUM001) that may help treat the liver and control itching in Alagille Syndrome. In this study, all children who are eligible to enrol will take study drug for 18 weeks, followed by a 4 week period where they will either take LUM001 or placebo. After this 4 week period, all patients will go back on active study drug treatment for the remaining 26 weeks                                                                                                                                                             | EUCTR2013-005373-43-BE                                                                                                                                                   | 2015 |
| An open label, multicenter, non randomized phase II study to evaluate anti-tumor efficacy and safety of GM-CSF (sargramostim, Leukine®) associated with RCHOP chemotherapy and Rituximab (MabThera®) maintenance in patients with first-line advanced follicular non Hodgkin's lymphoma - FL2008 RCHOPGM                                                                                                                                                                                                                                                                       | EUCTR2007-007056-33-FR                                                                                                                                                   | 2008 |
| Efficacy and safety study evaluating a new sublingual treatment in HDM allergic rhinitis                                                                                                                                                                                                                                                                                                                                                                                                                                                                                       | EUCTR2014-004223-46-BE                                                                                                                                                   | 2015 |
| A double-blind, placebo-controlled, randomized, multi-center phase II trial to assess the efficacy of Sorafenib added to standard primary therapy in patients with newly diagnosed AML = 60 years of age                                                                                                                                                                                                                                                                                                                                                                       | EUCTR2008-004968-40-DE                                                                                                                                                   | 2008 |
| MINERAL (Magnetic-resonance Image of Nutraceutical Efficacy on Relapsing-ms Autoimmune Lesions) study: a novel nutraceutical formula NEUROASPIS PLP10® for the treatment of relapsing-remitting multiple sclerosis                                                                                                                                                                                                                                                                                                                                                             | ISRCTN06166891                                                                                                                                                           | 2013 |

|                                                                                                                                                                                                                                                                                                      |                                                                                                                                                                                           |      |
|------------------------------------------------------------------------------------------------------------------------------------------------------------------------------------------------------------------------------------------------------------------------------------------------------|-------------------------------------------------------------------------------------------------------------------------------------------------------------------------------------------|------|
| A prospective, multicenter, phase-II trial of ibrutinib plus venetoclax in patients with creatinine clearance $\geq 30$ ml/min who have relapsed or refractory chronic lymphocytic leukemia (RR-CLL) with or without TP53 aberrations                                                                | NTR6249                                                                                                                                                                                   | 2017 |
| BUTEO: a clinical trial of BTT1023 in patients with primary sclerosing cholangitis (PSC)                                                                                                                                                                                                             | ISRCTN11233255                                                                                                                                                                            | 2015 |
| A study comparing several dose levels of LY3015014 in patients with high cholesterol studying the safety and ability of LY3015014 to reduce cholesterol                                                                                                                                              | EUCTR2013-000622-55-PL                                                                                                                                                                    | 2013 |
| Study to test whether apremilast is better than placebo (inactive substance in the same form as the drug) for the treatment of active Behçet's disease (oral ulcers). This study also tests how well the body tolerates apremilast. The study is conducted in several centers in different countries | EUCTR2014-002108-25-GR                                                                                                                                                                    | 2016 |
| Investigation of correlation between antitumor effect of combined lapatinib/capecitabine therapy and p95HER2, PTEN and PIK3CA in patients with HER2 positive breast cancer                                                                                                                           | JPRN-UMIN000007153                                                                                                                                                                        | 2012 |
| A Phase 3 Study of 2 Dose Regimens of Telaprevir in Combination with Peginterferon Alfa-2a (Pegasys) and Ribavirin (Copegus) in Treatment-Naive Subjects with Genotype 1 Chronic Hepatitis C                                                                                                         | EUCTR2007-004720-20-IT                                                                                                                                                                    | 2008 |
| A phase I/II trial for evaluating both safety and preliminary efficacy of one cycle of Promethera Hepastem in Urea Cycle Disorders and Crigler-Najjar Syndrome patients                                                                                                                              | EUCTR2011-004074-28-IT                                                                                                                                                                    | 2013 |
| Therapeutic efficacy of Wilms tumor gene (WT1) mRNA-electroporated autologous dendritic cell vaccination in patients with myeloid malignancies and multiple myeloma: a phase II trial                                                                                                                | EUCTR2009-015720-28-BE                                                                                                                                                                    | 2009 |
| A randomized, double-blind, placebo-controlled, multicenter, dose-range, proof-of-concept, 24-week treatment study of IVA337 in adult subjects with nonalcoholic steatohepatitis (NASH)                                                                                                              | EUCTR2016-001979-70-PL                                                                                                                                                                    | 2017 |
| SOFIA Study                                                                                                                                                                                                                                                                                          | RPCEC00000118                                                                                                                                                                             | 2011 |
| PROBE TRIAL proof-of-concept study on the use of rilpivirine as substitutive agent for the HAART nucleosidic backbone in virologic suppressed patients                                                                                                                                               | EUCTR2013-002573-22-IT                                                                                                                                                                    | 2013 |
| Interleukin-10 Levels and Clinical Outcome : comparison of Retroperitoneal versus Transperitoneal Approaches in Infra-Renal Abdominal Aorta Reconstruction                                                                                                                                           | Erkalp, , K, Inan, B, Abut, Y, Teker, G, Basaranoglu, G, Kalko, Y; Gumus, F                                                                                                               | 2014 |
| Developing microbiome restoration biomarkers for clostridium difficile infections: evaluation and plan of a prototype microbiome rehabilitation index™                                                                                                                                               | Blount, , K, Jones, C, Carter, S, Deych, E; Shannon, B                                                                                                                                    | 2017 |
| Preoperative oral immune-enhancing nutritional supplementation corrects TH1/TH2 imbalance in patients undergoing elective surgery for colorectal cancer                                                                                                                                              | Matsuda, , A, Furukawa, K, Takasaki, H, Suzuki, H, Kan, H, Tsuruta, H, Shinji, S; Tajiri, T                                                                                               | 2006 |
| Osteoarthritis year in review: rehabilitation and outcomes                                                                                                                                                                                                                                           | Maly, M                                                                                                                                                                                   | 2014 |
| COPART Risk Score Predicts Long-term Mortality in Peripheral Arterial Occlusive Disease                                                                                                                                                                                                              | Hackl, , G, Belaj, K, Gary, T, Rief, P, Deutschmann, H, Seinst, G, Brodmann, M; Hafner, F                                                                                                 | 2015 |
| Protocol for the Gut Bugs Trial: a randomised double-blind placebo-controlled trial of gut microbiome transfer for the treatment of obesity in adolescents                                                                                                                                           | Leong, , KSW, Jayasinghe, TN, Derriak, JGB, Albert, BB, Chiavaroli, V, Svirskis, DM, Beck, KL, Conlon, CA, Jiang, Y, Schierding, W, Vatanen, T, Holland, DJ, O'Sullivan, JM; Cutfield, WS | 2019 |
| Randomized comparison of conventional carbon dioxide insufflation and abdominal wall lifting for laparoscopic cholecystectomy                                                                                                                                                                        | Uen, , YH, Liang, AI; Lee, HH                                                                                                                                                             | 2002 |
| Systemic inflammatory response syndrome after pediatric congenital heart surgery: incidence, risk factors, and clinical outcome                                                                                                                                                                      | Boehne, , M, Sasse, M, Karch, A, Dziuba, F, Horke, A, Kaussen, T, Mikolajczyk, R, Beerbaum, P; Jack, T                                                                                    | 2017 |
| The GRAFT Study: gut RecolonizAtion by Fecal Transplantation                                                                                                                                                                                                                                         | NCT03621657                                                                                                                                                                               | 2018 |
| Can fish oil supplementation improve endothelial function in asymptomatic offspring of patients with peripheral arterial disease?                                                                                                                                                                    | Ian Spark, , J, Delaney, CL, Allan, RB, Ho, MHL; Miller, MD                                                                                                                               | 2012 |
| Effects of epidural anesthesia on stress-induced immune suppression during major corrective spine surgery                                                                                                                                                                                            | Ezhevskaja, , AA, Prusakova, ZhB, Maksimova, LP, Sholkina, MN, Balmusova, EA; Ovechkin, AM                                                                                                | 2014 |
| Novel bioactive from Lactobacillus brevis DSM17250 to stimulate the growth of Staphylococcus epidermidis: a pilot study                                                                                                                                                                              | Holz, , C, Benning, J, Schaudt, M, Heilmann, A, Schultchen, J, Goelling, D; Lang, C                                                                                                       | 2017 |
| Nitrotyrosine (NT), a Nitrosative Stress Biomarker, Plasma Concentrations in Gallstone Disease and Cancer Patients                                                                                                                                                                                   | Saimanen, , I, Rahkola, D, Kuosmanen, V, Kärkkäinen, J, Selander, T, Holopainen, A, Aspinen, S; Eskelinen, M                                                                              | 2019 |
| The Effects of Synbiotic Supplementation on Body Mass Index, Metabolic and Inflammatory Biomarkers, and Appetite in Patients with Metabolic Syndrome: a Triple-Blind Randomized Controlled Trial                                                                                                     | Rabiei, , S, Hedayati, M, Rashidkhani, B, Saadat, N; Shakerhossini, R                                                                                                                     | 2019 |
| The elucidation of the action mechanism on the effectiveness of propagermanium for Crohn's disease                                                                                                                                                                                                   | JPRN-UMIN000013534                                                                                                                                                                        | 2014 |
| A multicenter, prospective, randomised, cross-over, exploratory, open pilot study to evaluate the influence on METAbolomics and PROteomics in end stage renal disease patients with post-dilution On-LINE-HDF versus conventional haemodialysis                                                      | DRKS00010917                                                                                                                                                                              | 2016 |
| Efficacy of sleep apnoea (OSA) therapy for the reduction of atrial fibrillation (AF) burden and morbidity in adults with OSA and AF                                                                                                                                                                  | ACTRN12616000903482                                                                                                                                                                       | 2016 |
| A Probiotic and Magnesium orotate combination for the treatment of depression                                                                                                                                                                                                                        | ACTRN12617000419369                                                                                                                                                                       | 2017 |

|                                                                                                                                                                                                                              |                                                                                                                                                                                                                                                                                                                                                                                                                                                                                                                                              |      |
|------------------------------------------------------------------------------------------------------------------------------------------------------------------------------------------------------------------------------|----------------------------------------------------------------------------------------------------------------------------------------------------------------------------------------------------------------------------------------------------------------------------------------------------------------------------------------------------------------------------------------------------------------------------------------------------------------------------------------------------------------------------------------------|------|
| Faecal microbiota transplantation with tenofovir is superior to tenofovir alone in improving clinical outcomes in acute-on-chronic liver failure due to hepatitis B: an open label randomized controlled trial (NCT02689245) | Ahmad, J, Kumar, M, Sarin, SK, Sharma, S, Choudhury, A, Jindal, A, Trehanpati, N, Kulkarni, A, Choudhury, S; Verma, A                                                                                                                                                                                                                                                                                                                                                                                                                        | 2019 |
| Structural and histological differences between connective tissue grafts harvested from the lateral palatal mucosa or from the tuberosity area                                                                               | Sanz-Martin, I, Rojo, E, Maldonado, E, Stroppa, G, Nart, J; Sanz, M                                                                                                                                                                                                                                                                                                                                                                                                                                                                          | 2019 |
| Faecal microbiota transplantation with tenofovir is superior to tenofovir alone in improving clinical outcomes in acute-on-chronic liver failure due to hepatitis B: an open label randomized controlled trial (NCT02689245) | Ahmad, J, Kumar, M, Sarin, SK, Sharma, S, Choudhury, A, Jindal, A, Trehanpati, N, Kulkarni, A, Choudhury, S; Verma, A                                                                                                                                                                                                                                                                                                                                                                                                                        | 2019 |
| COLchicine for the preVention of postopErative atrial fibRillation in patients undergoing Coronary Artery By-pass Grafting                                                                                                   | ISRCTN72835417                                                                                                                                                                                                                                                                                                                                                                                                                                                                                                                               | 2013 |
| Dental implant placement techniques                                                                                                                                                                                          | CTRI/2018/02/012200                                                                                                                                                                                                                                                                                                                                                                                                                                                                                                                          | 2018 |
| Probiotics and Orotic Acid for treatment resistant depression                                                                                                                                                                | ACTRN12616000401459                                                                                                                                                                                                                                                                                                                                                                                                                                                                                                                          | 2016 |
| Gonadotropin-releasing hormone agonist treatment reduced serum interleukin-6 concentrations in patients with ovarian endometriomas                                                                                           | Iwabe, T, Harada, T, Sakamoto, Y, Iba, Y, Horie, S, Mitsunari, M; Terakawa, N                                                                                                                                                                                                                                                                                                                                                                                                                                                                | 2003 |
| Alteration in salivary proteins following non surgical periodontal therapy in generalized chronic periodontitis subjects                                                                                                     | Sharma, A, Nagtilak, S, Khattak, BP, Singh, G; Bano, T                                                                                                                                                                                                                                                                                                                                                                                                                                                                                       | 2015 |
| Multimodal treatment of perianal fistulas in Crohn's disease: seton versus anti-TNF versus advancement plasty (PISA): study protocol for a randomized controlled trial                                                       | de Groof, EJ, Buskens, CJ, Ponsioen, CY, Dijkgraaf, MG, D'Haens, GR, Srivastava, N, van Acker, GJ, Jansen, JM, Gerhards, MF, Dijkstra, G, Lange, JF, Witteman, BJ, Kruij, PM, Pronk, A, van Tuyl, SA, Bodelier, A, Crolla, RM, West, RL, Vrijland, WW, Consten, EC, Brink, MA, Tuynman, JB, de Boer, NK, Breukink, SO, Pierik, MJ, Oldenburg, B, van der Meulen, AE, Bonsing, BA, Spinelli, A, Danese, S, Sacchi, M, Warusavitarne, J, Hart, A, Yassin, NA, Kennelly, RP, Cullen, GJ, Winter, DC, Hawthorne, AB, Torkington, J; Bemelman, WA | 2015 |
| Phase II clinical trial of cediranib in patients with metastatic castration-resistant prostate cancer                                                                                                                        | Dahut, WL, Madan, RA, Karakunnel, JJ, Adelberg, D, Gulley, JL, Turkbey, IB, Chau, CH, Spencer, SD, Mulquin, M, Wright, J, Parnes, HL, Steinberg, SM, Choyke, PL; Figg, WD                                                                                                                                                                                                                                                                                                                                                                    | 2013 |
| Influence of prophylactic, endovascularly based normothermia on inflammation in patients with severe cerebrovascular disease: a prospective, randomized trial                                                                | Broessner, G, Lackner, P, Fischer, M, Beer, R, Helbok, R, Pfaußler, B, Schneider, D; Schmutzhard, E                                                                                                                                                                                                                                                                                                                                                                                                                                          | 2010 |
| Fenofibrate in the management of Abdominal aortic aneurysm (FAME): study protocol for a randomised controlled trial                                                                                                          | Rowbotham, SE, Cavaye, D, Jaeggi, R, Jenkins, JS, Moran, CS, Moxon, JV, Pinchbeck, JL, Quigley, F, Reid, CM; Gollidge, J                                                                                                                                                                                                                                                                                                                                                                                                                     | 2017 |
| A T-cell-based enzyme-linked immunospot assay for tuberculosis screening in Chinese patients with rheumatic diseases receiving infliximab therapy                                                                            | Xie, X, Chen, J-W, Li, F, Tian, J, Gao, J-S; Zhang, D                                                                                                                                                                                                                                                                                                                                                                                                                                                                                        | 2011 |
| Efficacy of thiopurines and adalimumab in preventing Crohn's disease recurrence in high-risk patients - a POCER study analysis                                                                                               | De Cruz, P, Kamm, MA, Hamilton, AL, Ritchie, KJ, Krejany, EO, Gorelik, A, Liew, D, Prideaux, L, Lawrance, IC, Andrews, JM, Bampton, PA, Jakobovits, S, Florin, TH, Gibson, PR, Debinski, H, Gearry, RB, Macrae, FA, Leong, RW, Kronborg, I, Radford-Smith, G, Selby, W, Johnston, MJ, Woods, R, Elliott, PR, Bell, SJ, Brown, SJ, Connell, WR; Desmond, PV                                                                                                                                                                                   | 2015 |
| The relevance of hyperglycemia in pregnancy on perinatal outcomes and future burden of non-communicable diseases in Europe and the FIGO guideline                                                                            | Hod, M                                                                                                                                                                                                                                                                                                                                                                                                                                                                                                                                       | 2017 |
| A randomized, open-label, comparative, 6-month trial of oral ultra-low doses of antibodies to tumor necrosis factor- $\alpha$ and diclofenac in rheumatoid arthritis                                                         | Dugina, JL, Petrov, VI, Babayeva, AR, Martyushev-Poklad, AV, Tcherevkova, EV, Epstein, OI; Sergeeva, SA                                                                                                                                                                                                                                                                                                                                                                                                                                      | 2005 |
| Adverse outcome and resistance to adjuvant antiestrogen therapy in node-positive postmenopausal breast cancer patients-The role of p53                                                                                       | Rahko, E, Blanco, G, Bloigu, R, Soini, Y, Talvensaari-Mattila, A; Jukkola, A                                                                                                                                                                                                                                                                                                                                                                                                                                                                 | 2006 |
| Lumbosacral radicular pain due to disc herniation                                                                                                                                                                            | Vissers, K                                                                                                                                                                                                                                                                                                                                                                                                                                                                                                                                   | 2012 |
| Coronary Artery Disease Evaluation in Rheumatoid Arthritis (CADERA): study protocol for a randomized controlled trial                                                                                                        | Erhayiem, B, Pavitt, S, Baxter, P, Andrews, J, Greenwood, JP, Buch, MH; Plein, S                                                                                                                                                                                                                                                                                                                                                                                                                                                             | 2014 |
| Extended adjuvant intermittent letrozole versus continuous letrozole in postmenopausal women with breast cancer (SOLE): a multicentre, open-label, randomised, phase 3 trial                                                 | Colleoni, M, Luo, W, Karlsson, P, Chirgwin, J, Aebi, S, Jerusalem, G, Neven, P, Hitre, E, Graas, M-P, Simoncini, E, Kamby, C, Thompson, A, Loibl, S, Gavila, J, Kuroi, K, Marth, C, Muller, B, O'Reilly, S, Di Lauro, V, Gombos, A, Ruhstaller, T, Burstein, H, Ribi, K, Bernhard, J, Viale, G, Maibach, R, Rabaglio-Poretti, M, Gelber, RD, Coates, AS, Di Leo, A, Regan, MM; Goldhirsch, A                                                                                                                                                 | 2018 |
| Efficacy and safety of infliximab in active SLE: a pilot study                                                                                                                                                               | Uppal, SS, Hayat, SJ; Raghupathy, R                                                                                                                                                                                                                                                                                                                                                                                                                                                                                                          | 2009 |
| Treatment of chronic myeloid leukemia with autologous transplantation using peripheral blood stem cells or bone marrow cultured in IL-2 followed by IL-2, GM-CSF, and IFN- $\alpha$ administration                           | Hajek, R, Zackova, D, Buchler, T, Penka, M, Krahulcova, E, Koristek, Z, Vinklarkova, J, Adler, J, Janovska, E, Indrak, K, Faber, E, Doubek, M, Klabusay, M, Oltova, A, Kuglik, P, Bourkova, L, Dusek, L, Mareschova, I, Mayer, J; Vorlicek, J                                                                                                                                                                                                                                                                                                | 2003 |
| Role of biomarkers in early postoperative period of lung transplantation                                                                                                                                                     | Suberviola, B, Riera, J, Rellan, L, Sanchez, M, Robles, JC, Lopez, E, Vicente, R, Minambres, E; Santibanez, M                                                                                                                                                                                                                                                                                                                                                                                                                                | 2016 |
| Phase II study of adjuvant chemotherapy of S-1 plus oxaliplatin for patients with stage III gastric cancer after D2 gastrectomy                                                                                              | Shitara, K, Chin, K, Yoshikawa, T, Katai, H, Terashima, M, Ito, S, Hirao, M, Yoshida, K, Oki, E, Sasako, M, Emi, Y; Tsujinaka, T                                                                                                                                                                                                                                                                                                                                                                                                             | 2017 |
| Afatinib versus cisplatin plus gemcitabine for first-line treatment of Asian patients with advanced non-small-cell lung cancer harbouring EGFR mutations (LUX-Lung 6): an open-label, randomised phase 3 trial               | Wu, YL, Zhou, C, Hu, CP, Feng, J, Lu, S, Huang, Y, Li, W, Hou, M, Shi, JH, Lee, KY, Xu, CR, Massey, D, Kim, M, Shi, Y; Geater, SL                                                                                                                                                                                                                                                                                                                                                                                                            | 2014 |
| Epigenetics and Periodontal Treatment                                                                                                                                                                                        | NCT02835898                                                                                                                                                                                                                                                                                                                                                                                                                                                                                                                                  | 2016 |

|                                                                                                                                                                                                                                         |                                                                                                                                                                                                                                                                                    |      |
|-----------------------------------------------------------------------------------------------------------------------------------------------------------------------------------------------------------------------------------------|------------------------------------------------------------------------------------------------------------------------------------------------------------------------------------------------------------------------------------------------------------------------------------|------|
| Intraoperative cerebral oxygenation, oxidative injury, and delirium following cardiac surgery                                                                                                                                           | Lopez, , MG, Pandharipande, P, Morse, J, Shotwell, MS, Milne, GL, Pretorius, M, Shaw, AD, Roberts, LJ; Billings, FT                                                                                                                                                                | 2017 |
| IL-1beta, TNF-alpha, total antioxidative status and microbiological findings in chronic periodontitis treated with fluorescence-controlled Er: YAG laser radiation                                                                      | Dominguez, , A, Gómez, C, García-Kass, AI; García-Núñez, JA                                                                                                                                                                                                                        | 2010 |
| A Diet Low in FODMAPs Reduces Symptoms in Patients With Irritable Bowel Syndrome and A Probiotic Restores Bifidobacterium Species: a Randomized Controlled Trial                                                                        | Staudacher, , HM, Lomer, MCE, Farquharson, FM, Louis, P, Fava, F, Franciosi, E, Scholz, M, Tuohy, KM, Lindsay, JO, Irving, PM; Whelan, K                                                                                                                                           | 2017 |
| Tumor necrosis factor-alpha antibody for induction of remission in Crohn's disease                                                                                                                                                      | Akobeng, , AK; Zachos, M                                                                                                                                                                                                                                                           | 2004 |
| Can regional analgesia reduce the risk of recurrence after breast cancer? Methodology of a multicenter randomized trial                                                                                                                 | Sessler, , DI, Ben-Eliah, S, Mascha, EJ, Parat, MO; Buggy, DJ                                                                                                                                                                                                                      | 2008 |
| Effect of Parathyroidectomy on Cardiovascular Health                                                                                                                                                                                    | NCT02989428                                                                                                                                                                                                                                                                        | 2016 |
| Steroids in biliary atresia: single surgeon, single centre, prospective study                                                                                                                                                           | Davenport, , M, Parsons, C, Tizzard, S; Hadzic, N                                                                                                                                                                                                                                  | 2013 |
| Comparative Efficacy of Self-directed & Therapist-assisted Telehealth Parent Training Intervention for Children With ASD                                                                                                                | NCT02721381                                                                                                                                                                                                                                                                        | 2016 |
| Periodontal therapy reduces plasma levels of interleukin-6, C-reactive protein, and fibrinogen in patients with severe periodontitis and refractory arterial hypertension                                                               | Vidal, , F, Figueredo, CM, Cordovil, I; Fischer, RG                                                                                                                                                                                                                                | 2009 |
| E-23596 - Use of NCPAP Cycling to Wean Preterm Infants                                                                                                                                                                                  | NCT02114112                                                                                                                                                                                                                                                                        | 2014 |
| Simultaneous hybrid coronary revascularization reduces postoperative morbidity compared with results from conventional off-pump coronary artery bypass                                                                                  | Kon, , ZN, Brown, EN, Tran, R, Joshi, A, Reicher, B, Grant, MC, Kallam, S, Burris, N, Connerney, I, Zimrin, D; Poston, RS                                                                                                                                                          | 2008 |
| A comparison of clinical variables that predict adverse outcome in term infants with severe respiratory failure randomised to a policy of extracorporeal membrane oxygenation or to conventional neonatal intensive care                | Bennett, , CC, Johnson, A; Field, DJ                                                                                                                                                                                                                                               | 2002 |
| Immunomodulatory effects of acupuncture in the treatment of allergic asthma: a randomized controlled study                                                                                                                              | Joos, , S, Schott, C, Zou, H, Daniel, V; Martin, E                                                                                                                                                                                                                                 | 2000 |
| The clinical effects of dendritic cell vaccines combined with cytokine-induced killer cells intraperitoneal injected on patients with malignant ascites                                                                                 | Ai, , Y-Q, Cai, K, Hu, J-H, Jiang, L-W, Gao, Y-R, Zhao, H; Jia, S-C                                                                                                                                                                                                                | 2014 |
| Neoadjuvant plus adjuvant or only adjuvant nab-paclitaxel plus gemcitabine for resectable pancreatic cancer - The NEONAX trial (AIO-PAK-0313), a prospective, randomized, controlled, phase II study of the AIO pancreatic cancer group | Ettrich, , TJ, Berger, AW, Perkhof, L, Daum, S, König, A, Dickhut, A, Wittel, U, Wille, K, Geissler, M, Algul, H, Gallmeier, E, Atzpodien, J, Kornmann, M, Mücke, R, Prasnikar, N, Tannapfel, A, Reinacher-Schick, A, Uhl, W; Seufferlein, T                                       | 2018 |
| Doxycycline-loaded $\beta$ -tricalcium phosphate release following EDTA root surface etching improved the clinical outcomes in chronic periodontitis: an in vivo study                                                                  | Gamal, , AY, Kumper, RM; Al Gendy Ael, R                                                                                                                                                                                                                                           | 2013 |
| Exogenous nitric oxide inhibits Rho-associated kinase activity in patients with angina pectoris: a randomized controlled trial                                                                                                          | Maruhashi, , T, Noma, K, Fujimura, N, Kajikawa, M, Matsumoto, T, Hidaka, T, Nakashima, A, Kihara, Y, Liao, JK; Higashi, Y                                                                                                                                                          | 2015 |
| A phase 3 randomized, double-blind, placebo-controlled trial of ganitumab or placebo in combination with gemcitabine as first-line therapy for metastatic adenocarcinoma of the pancreas: the GAMMA trial                               | Fuchs, , CS, Azevedo, S, Okusaka, T, Van Laethem, JL, Lipton, LR, Riess, H, Szczylik, C, Moore, MJ, Peeters, M, Bodoky, G, Ikeda, M, Melichar, B, Nemecek, R, Ohkawa, S, Świeboda-Sadlej, A, Tjulandin, SA, Van Cutsem, E, Loberg, R, Haddad, V, Gansert, JL, Bach, BA; Carrato, A | 2015 |
| Randomized Clinical Trial of Labetalol Versus Hydralazine for Severe Hypertension in Obstetric Patients                                                                                                                                 | NCT02050529                                                                                                                                                                                                                                                                        | 2014 |
| HPR self-management exercise program associated to spa therapy increased the physical activity level of people with symptomatic knee osteoarthritis: a quasi-randomized controlled trial                                                | Gay, , C, Auclair, C, Boisseau, N, Gerbaud, L; Coudeyre, E                                                                                                                                                                                                                         | 2017 |
| Short daily versus conventional hemodialysis for hypertensive patients: a randomized cross-over study                                                                                                                                   | Zimmerman, , DL, Ruzicka, M, Hebert, P, Fergusson, D, Touyz, RM; Burns, KD                                                                                                                                                                                                         | 2014 |
| The effects of elastic tubing-based resistance training compared with conventional resistance training in patients with moderate chronic obstructive pulmonary disease: a randomized clinical trial                                     | Ramos, , EM, de Toledo-Arruda, AC, Fosco, LC, Bonfim, R, Bertolini, GN, Guarnier, FA, Cecchini, R, Pastre, CM, Langer, D, Gosselink, R; Ramos, D                                                                                                                                   | 2014 |
| Effect of various mouthwashes on the levels of interleukin-2 and interferon-gamma in chronic gingivitis                                                                                                                                 | Sharma, , S, Saimbi, CS, Koirala, B; Shukla, R                                                                                                                                                                                                                                     | 2008 |
| Procalcitonin to guide duration of antibiotic therapy in intensive care patients: a randomized prospective controlled trial                                                                                                             | Hochreiter, , M, Köhler, T, Schweiger, AM, Keck, FS, Bein, B, von Spiegel, T; Schroeder, S                                                                                                                                                                                         | 2009 |
| Incremental Value of Preoperative Copeptin for Predicting Myocardial Injury                                                                                                                                                             | Mauermann, , E, Bolliger, D, Seeberger, E, Puelacher, C, Corbiere, S, Filipovic, M, Seeberger, M, Mueller, C; Lurati Buse, G                                                                                                                                                       | 2016 |
| Association of HLA-DR genotypes and IL-1ra gene polymorphism with treatment failure of budesonide and disease patterns in Crohn's disease                                                                                               | Gelbmann, , CM, Rogler, G, Gierend, M, Gross, V, Schölmerich, J; Andus, T                                                                                                                                                                                                          | 2001 |
| Ramucirumab versus placebo as second-line treatment in patients with advanced hepatocellular carcinoma following first-line therapy with sorafenib (REACH): a randomised, double-blind, multicentre, phase 3 trial                      | Zhu, , AX, Park, JO, Ryoo, BY, Yen, CJ, Poon, R, Pastorelli, D, Blanc, JF, Chung, HC, Baron, AD, Pfiffer, TE, Okusaka, T, Kubackova, K, Trojan, J, Sastre, J, Chau, I, Chang, SC, Abada, PB, Yang, L, Schwartz, JD; Kudo, M                                                        | 2015 |
| Comparative evaluation of adjunctive oral irrigation in diabetics                                                                                                                                                                       | Al-Mubarak, , S, Ciancio, S, Aljada, A, Mohanty, P, Ross, C; Dandona, P                                                                                                                                                                                                            | 2002 |
| Risk of post-operative complications among Crohn's disease patients treated pre-operatively with vedolizumab. A matched case-control study                                                                                              | Kim, , JY, Zaghiyan, K; Fleshner, P                                                                                                                                                                                                                                                | 2018 |

|                                                                                                                                                                                                                                     |                                                                                                                                                                                                                                                                                                                      |      |
|-------------------------------------------------------------------------------------------------------------------------------------------------------------------------------------------------------------------------------------|----------------------------------------------------------------------------------------------------------------------------------------------------------------------------------------------------------------------------------------------------------------------------------------------------------------------|------|
| Prospective Dutch colorectal cancer cohort: an infrastructure for long-term observational, prognostic, predictive and (randomized) intervention research                                                                            | Burbach, , JPM, Kurk, SA, Coebergh van den Braak, RRJ, Dik, VK, May, AM, Meijer, GA, Punt, CJA, Vink, GR, Los, M, Hoogerbrugge, N, Huijgens, PC, Ijzermans, JNM, Kuipers, EJ, de Noo, ME, Pennings, JP, van der Velden, AMT, Verhoef, C, Siersema, PD, van Oijen, MGH, Verkooijen, HM; Koopman, M                    | 2016 |
| Peripheral blood stem cell mobilization with cyclophosphamide in combination with G-CSF, GM-CSF, or sequential GM-CSF/G-CSF in non-Hodgkin's lymphoma patients: a randomized prospective study                                      | Gazitt, , Y, Callander, N, Freytes, CO, Shaughnessy, P, Liu, Q, Tsai, TW; Devore, P                                                                                                                                                                                                                                  | 2000 |
| The functional dyspepsia treatment trial (FDTT): 5-HTT LPR and GNbeta3 825C>T are not pharmacogenetic markers for FD antidepressant treatment response                                                                              | Saito, , YA, Almazar, AE, Locke, GR, Bouras, EP, Howden, CW, Lacy, BE, DiBaise, JK, Prather, CM, Abraham, B, El-Serag, H, Moayyedi, P, Szarka, LA, Herrick, LM, Tilkes, KE, Schleck, CD, Zinsmeister, AR; Talley, NJ                                                                                                 | 2014 |
| Study design for a randomised controlled trial to explore the modality and mechanism of Tai Chi in the pulmonary rehabilitation of chronic obstructive pulmonary disease                                                            | Fu, , JJ, Min, J, Yu, PM, McDonald, VM; Mao, B                                                                                                                                                                                                                                                                       | 2016 |
| The effects of ozone therapy on periodontal therapy: a randomized placebo-controlled clinical trial                                                                                                                                 | Tasdemir, , Z, Oskaybas, MN, Alkan, AB; Cakmak, O                                                                                                                                                                                                                                                                    | 2019 |
| The Marigot Osteoarthritis Nutritional Intervention (MOANi) Trial                                                                                                                                                                   | NCT03106584                                                                                                                                                                                                                                                                                                          | 2017 |
| Effects of phospholipid-coated extracorporeal circuits on clinical outcome parameters and systemic inflammatory response in coronary artery bypass graft patients                                                                   | Schulz, , CM, Pritisanac, A, Schütz, A, Kilger, E, Platzer, H, Reichart, B; Wildhirt, SM                                                                                                                                                                                                                             | 2002 |
| Evaluation of Efficacy and Safety of Neoadjuvant Treatment With Pamrevlumab in Combination With Chemotherapy (Gemcitabine and Nab-paclitaxel) in Locally Advanced Pancreatic Cancer                                                 | NCT03941093                                                                                                                                                                                                                                                                                                          | 2019 |
| Radiation treatment intensification                                                                                                                                                                                                 | Belderbos, J                                                                                                                                                                                                                                                                                                         | 2016 |
| Comparison of an intravenous pulse of methylprednisolone versus oral corticosteroid in severe acute rheumatic carditis: a randomized clinical trial                                                                                 | Câmara, , EJ, Braga, JC, Alves-Silva, LS, Câmara, GF; da Silva Lopes, AA                                                                                                                                                                                                                                             | 2002 |
| Efficacy trial of bioresonance in children with atopic dermatitis                                                                                                                                                                   | Schöni, , MH, Nikolaizik, WH; Schöni-Affolter, F                                                                                                                                                                                                                                                                     | 1997 |
| Changes in the Risk Factors of Coronary Heart Disease Observed After Scaling and Root Planing                                                                                                                                       | NCT02417376                                                                                                                                                                                                                                                                                                          | 2015 |
| Prognostic value of serial blood S100B determinations in stage IIB-III melanoma patients: a corollary study to EORTC trial 18952                                                                                                    | Bouwhuis, , MG, Suciu, S, Kruit, W, Salès, F, Stoitchkov, K, Patel, P, Cocquyt, V, Thomas, J, Liénard, D, Eggermont, AM; Ghanem, G                                                                                                                                                                                   | 2011 |
| Spanish Diabetes Self-Management Program                                                                                                                                                                                            | NCT00496145                                                                                                                                                                                                                                                                                                          | 2007 |
| Treatment of older patients with HER2-positive metastatic breast cancer with pertuzumab, trastuzumab, and docetaxel: subgroup analyses from a randomized, double-blind, placebo-controlled phase III trial (CLEOPATRA)              | Miles, , D, Baselga, J, Amadori, D, Sunpaweravong, P, Semiglazov, V, Knott, A, Clark, E, Ross, G; Swain, SM                                                                                                                                                                                                          | 2013 |
| Efficacy of Combined Photoablative-Photodynamic Diode Laser Therapy Adjunctive to Scaling and Root Planing in Periodontitis: randomized Split-Mouth Trial with 4-Year Follow-Up                                                     | Giannelli, , M, Formigli, L, Lorenzini, L; Bani, D                                                                                                                                                                                                                                                                   | 2015 |
| Effects of an immuno-enhanced diet containing antioxidants in esophageal cancer surgery following neoadjuvant therapy                                                                                                               | Aiko, , S, Kumano, I, Yamanaka, N, Tsujimoto, H, Takahata, R; Maehara, T                                                                                                                                                                                                                                             | 2012 |
| The use of dose-intensified chemotherapy in the treatment of metastatic nonseminomatous testicular germ cell tumors. German Testicular Cancer Study Group                                                                           | Bokemeyer, , C, Harstrick, A, Beyer, J, Metzner, B, Rütger, U, Hartmann, JT, Holstein, K, Derigs, HG, de Wit, R, Casper, J, Schöffski, P, Kührer, I, Illiger, HJ, Kempf, B, Reichle, A, Föller, A, Hossfeld, DK, Fischer, JT, Berdel, WE, Gerhartz, HH, Kirchner, H, Pflüger, KH, Ostermann, H, Kanz, L; Schmoll, HJ | 1998 |
| The efficacy of lactobacillus reuteri 4659 in reducing abdominal symptoms and inflammatory biomarkers in acute uncomplicated diverticulitis: a double-blind, randomized, placebo-controlled trial                                   | Petruzziello, , C, Franceschi, F, Covino, M, Migneco, A; Ojetti, V                                                                                                                                                                                                                                                   | 2018 |
| Lower tidal volume strategy (3 ml/kg) combined with extracorporeal CO2 removal versus 'conventional' protective ventilation (6 ml/kg) in severe ARDS: the prospective randomized Xtravent-study                                     | Bein, , T, Weber-Carstens, S, Goldmann, A, Muller, T, Staudinger, T, Brederlau, J, Muellenbach, R, Dembinski, R, Graf, BM, Wewalka, M, Philipp, A, Wernecke, K-D, Lubnow, M; Slutsky, AS                                                                                                                             | 2013 |
| Carpal tunnel syndrome and musculoskeletal symptoms in postmenopausal women with early breast cancer treated with exemestane or tamoxifen after 2-3 years of tamoxifen: a retrospective analysis of the Intergroup Exemestane Study | Micog, , JSD, Morden, JP, Bliss, JM, Coombes, RC; Van de Velde, CJH                                                                                                                                                                                                                                                  | 2012 |
| Cytokine profiles in pemphigus vulgaris patients treated with intravenous immunoglobulins as compared to conventional immunosuppressive therapy                                                                                     | Keskin, , DB, Stern, JN, Fridkis-Hareli, M; Razzaque Ahmed, A                                                                                                                                                                                                                                                        | 2008 |
| The inflammatory response to recycled pericardial suction blood and the influence of cell-saving                                                                                                                                    | Svenmarker, , S; Engström, KG                                                                                                                                                                                                                                                                                        | 2003 |
| Curative effect of Xuebijing injection on severe pulmonary contusion                                                                                                                                                                | Chen, , Y, Tong, H, Zhang, W, Zhang, X, Pan, Z, Qiu, J, Pan, R; Su, L                                                                                                                                                                                                                                                | 2013 |
| Clinical observation on the effect of minimally invasive flapless technique and implant prognosis in oral implants                                                                                                                  | Jiao, , G; Gao, M                                                                                                                                                                                                                                                                                                    | 2018 |
| Short- versus long-term antimicrobial treatment for acute hematogenous osteomyelitis of childhood: prospective, randomized trial on 131 culture-positive cases                                                                      | Peltola, , H, Pääkkönen, M, Kallio, P; Kallio, MJ                                                                                                                                                                                                                                                                    | 2010 |
| Grape resveratrol increases serum adiponectin and downregulates inflammatory genes in peripheral blood mononuclear cells: a triple-blind,                                                                                           | Tomé-Carneiro, , J, González, M, Larrosa, M, Yáñez-Gascón, MJ, García-Almagro, FJ, Ruiz-Ros, JA, Tomás-Barberán, FA, García-Conesa, MT; Espín, JC                                                                                                                                                                    | 2013 |

|                                                                                                                                                                                                                                     |                                                                                                                                                                                                                                                                |      |
|-------------------------------------------------------------------------------------------------------------------------------------------------------------------------------------------------------------------------------------|----------------------------------------------------------------------------------------------------------------------------------------------------------------------------------------------------------------------------------------------------------------|------|
| placebo-controlled, one-year clinical trial in patients with stable coronary artery disease                                                                                                                                         |                                                                                                                                                                                                                                                                |      |
| Carpal tunnel syndrome and musculoskeletal symptoms in postmenopausal women with early breast cancer treated with exemestane or tamoxifen after 2-3 years of tamoxifen: a retrospective analysis of the Intergroup Exemestane Study | Mieog, , JS, Morden, JP, Bliss, JM, Coombes, RC; van de Velde, CJ                                                                                                                                                                                              | 2012 |
| A phase II study of neoadjuvant combination chemotherapy with docetaxel, cisplatin, and S-1 for locally advanced resectable gastric cancer: nucleotide excision repair (NER) as potential chemoresistance marker                    | Hirakawa, , M, Ohnuma, H, Takayama, T, Sagawa, T, Nobuoka, T, Harada, K, Miyamoto, H, Sato, Y, Takahashi, Y, Katsuki, S, Hirayama, M, Takahashi, M, Ono, M, Maeda, M, Takada, K, Hayashi, T, Sato, T, Miyanishi, K, Takimoto, R, Kobune, M, Hirata, K; Kato, J | 2013 |
| Local or Regional or General Anesthesia for Hernia Repair: a Randomized Controlled Trial                                                                                                                                            | NCT01845376                                                                                                                                                                                                                                                    | 2013 |
| Ferritin levels, inflammatory biomarkers, and mortality in peripheral arterial disease: a substudy of the Iron (Fe) and Atherosclerosis Study (FeAST) Trial                                                                         | Depalma, , RG, Hayes, VW, Chow, BK, Shamayeva, G, May, PE; Zacharski, LR                                                                                                                                                                                       | 2010 |
| Pravastatin immunomodulates IL-6 and C-reactive protein, but not IL-1 and TNF-alpha, in cardio-pulmonary bypass                                                                                                                     | Caorsi, , C, Pineda, F; Munoz, C                                                                                                                                                                                                                               | 2008 |
| Clinical trial of a novel non-thermal LED array for reversal of photoaging: clinical, histologic, and surface profilometric results                                                                                                 | Weiss, , RA, McDaniel, DH, Geronemus, RG; Weiss, MA                                                                                                                                                                                                            | 2005 |
| 28th Annual Meeting of the European Association of Cardiothoracic Anaesthesiologists, EACTA 2013                                                                                                                                    |                                                                                                                                                                                                                                                                | 2014 |
| Shenfu injection for improving cellular immunity and clinical outcome in patients with sepsis or septic shock                                                                                                                       | Zhang, , N, Liu, J, Qiu, Z, Ye, Y, Zhang, J; Lou, T                                                                                                                                                                                                            | 2017 |
| Hypocaloric versus normocaloric nutrition in critically ill patients                                                                                                                                                                | Petros, , S, Horbach, M, Weidhase, L, Seidel, F, Schwabe, K, Vogel, I; Dafava, E                                                                                                                                                                               | 2010 |
| Effect of a Sugar-Free Chewing Gum Containing Magnolia Bark Extract on Caries Lesions in Healthy Adult Volunteers                                                                                                                   | NCT02310308                                                                                                                                                                                                                                                    | 2014 |
| Timing of pre-operative Beta-blocker treatment in vascular surgery patients: influence on post-operative outcome                                                                                                                    | Flu, , WJ, van Kuijk, JP, Chonchol, M, Winkel, TA, Verhagen, HJ, Bax, JJ; Poldermans, D                                                                                                                                                                        | 2010 |
| Efficacy and safety of abiraterone acetate in an elderly patient subgroup (aged 75 and older) with metastatic castration-resistant prostate cancer after docetaxel-based chemotherapy                                               | Mulders, , PF, Molina, A, Marberger, M, Saad, F, Higano, CS, Chi, KN, Li, J, Kheoh, T, Haqq, CM; Fizazi, K                                                                                                                                                     | 2014 |
| The anti-inflammatory effect of locally delivered nano-doxycycline gel in therapy of chronic periodontitis                                                                                                                          | Madi, , M, Pavlic, V, Samy, W; Alagl, A                                                                                                                                                                                                                        | 2018 |
| Effectiveness of Narrative Medicine on Pain Intensity and Quality of Life                                                                                                                                                           | NCT00106717                                                                                                                                                                                                                                                    | 2005 |
| Abatacept for the treatment of adults with psoriatic arthritis: patient selection and perspectives                                                                                                                                  |                                                                                                                                                                                                                                                                | 2018 |
| Study of Pamidronate for the Prevention of Heterotopic Ossification                                                                                                                                                                 | NCT00262392                                                                                                                                                                                                                                                    | 2005 |
| Cardiovascular patients: regional anesthesia revisited                                                                                                                                                                              | Moka, , E, Argyra, E, Siafaka, I; Vadalouca, A                                                                                                                                                                                                                 | 2014 |
| Nutritional effect of nandrolone decanoate in predialysis patients with chronic kidney disease                                                                                                                                      | Eiam-Ong, , S, Buranaosot, S, Eiam-Ong, S, Wathanavaha, A; Pansin, P                                                                                                                                                                                           | 2007 |
| Urinary cystatin C and acute kidney injury after cardiac surgery                                                                                                                                                                    | Koyner, , JL, Garg, AX, Shlipak, MG, Patel, UD, Sint, K, Hong, K, Devarajan, P, Edelstein, CL, Zappitelli, M, Thiessen-Philbrook, H; Parikh, CR                                                                                                                | 2013 |
| Sensitivity and specificity of a point-of-care matrix metalloproteinase 9 immunoassay for diagnosing inflammation related to dry eye                                                                                                | Sambursky, , R, Davitt, WF, Latkany, R, Tauber, S, Starr, C, Friedberg, M, Dirks, MS; McDonald, M                                                                                                                                                              | 2013 |
| The intraoperative effect of pentoxifylline on the inflammatory process and leukocytes in cardiac surgery patients undergoing cardiopulmonary bypass                                                                                | Cağli, , K, Ulaş, MM, Ozişik, K, Kale, A, Bakuy, V, Emir, M, Balci, M, Topbaş, M, Sener, E; Taşdemir, O                                                                                                                                                        | 2005 |
| Periodontal therapy reduces the severity of active rheumatoid arthritis in patients treated with or without tumor necrosis factor inhibitors                                                                                        | Ortiz, , P, Bissada, NF, Palomo, L, Han, YW, Al-Zahrani, MS, Panneerselvam, A; Askari, A                                                                                                                                                                       | 2009 |
| Incidental Genomics                                                                                                                                                                                                                 | NCT03597165                                                                                                                                                                                                                                                    | 2018 |
| Final analysis of a randomised trial comparing pembrolizumab versus investigator-choice chemotherapy for ipilimumab-refractory advanced melanoma                                                                                    | Hamid, , O, Puzanov, I, Dummer, R, Schachter, J, Daud, A, Schadendorf, D, Blank, C, Cranmer, LD, Robert, C, Pavlick, AC, Gonzalez, R, Hodi, FS, Ascierto, PA, Salama, AKS, Margolin, KA, Gangadhar, TC, Wei, Z, Ebbinghaus, S, Ibrahim, N; Ribas, A            | 2017 |
| Comparison of the acute-phase response after laparoscopic versus open aortobifemoral bypass surgery: a substudy of a randomized controlled trial                                                                                    | Krog, , AH, Sahba, M, Pettersen, EM, Sandven, I, Thorsby, PM, Jørgensen, JJ, Sundhagen, JO; Kazmi, SS                                                                                                                                                          | 2016 |
| Presentations of major peripheral arterial disease and risk of major outcomes in patients with type 2 diabetes: results from the ADVANCE-ON study                                                                                   | Mohammedi, , K, Woodward, M, Hirakawa, Y, Zoungas, S, Colagiuri, S, Hamet, P, Harrap, S, Poulter, N, Matthews, DR, Marre, M; Chalmers, J                                                                                                                       | 2016 |
| Biomarker analysis from the OpACIN trial (Neo-/adjuvant ipilimumab + nivolumab (IPI+NIVO) in palpable stage 3 melanoma)                                                                                                             | Rozeman, , L, Franchi, L, Kuilman, T, Krijgsman, O, Van Akkooi, A, Kvistborg, P, Van Thienen, H, Stegenga, B, Cullen, D, Lamon, B, Haanen, J, Cesano, A, Warren, S, Broeks, A, Schumacher, T; Blank, C                                                         | 2017 |
| Plasma phospholipid omega-3 fatty acids and incidence of postoperative atrial fibrillation in the OPERA trial                                                                                                                       | Wu, , JH, Marchioli, R, Silletta, MG, Macchia, A, Song, X, Siscovick, DS, Harris, WS, Masson, S, Latini, R, Albert, C, Brown, NJ, Lamarra, M, Favaloro, RR; Mozaffarian, D                                                                                     | 2013 |
| Perioperative Δ9-THC for Postsurgical Pain                                                                                                                                                                                          | NCT01790555                                                                                                                                                                                                                                                    | 2013 |
| Effectiveness of Emdogain in the periodontal treatment                                                                                                                                                                              | Kurhańska-Flisykowska, , A, Łojewski, W; Wyganowska-Swiatkowska, M                                                                                                                                                                                             | 2012 |



|                                                                                                                                                                                                                                                                                                                                                                                                                       |                                                                                                                                                                                                                                     |      |
|-----------------------------------------------------------------------------------------------------------------------------------------------------------------------------------------------------------------------------------------------------------------------------------------------------------------------------------------------------------------------------------------------------------------------|-------------------------------------------------------------------------------------------------------------------------------------------------------------------------------------------------------------------------------------|------|
| Mepolizumab for the treatment of eosinophilic granulomatosis with polyangiitis                                                                                                                                                                                                                                                                                                                                        |                                                                                                                                                                                                                                     | 2017 |
| Phase II randomised discontinuation trial of cabozantinib in patients with advanced solid tumours                                                                                                                                                                                                                                                                                                                     | Schöffski, , P, Gordon, M, Smith, DC, Kurzrock, R, Daud, A, Vogelzang, NJ, Lee, Y, Scheffold, C; Shapiro, GI                                                                                                                        | 2017 |
| Persistent clinical response to the anti-TNF-alpha antibody infliximab in patients with ankylosing spondylitis over 3 years                                                                                                                                                                                                                                                                                           | Braun, , J, Baraliakos, X, Brandt, J, Listing, J, Zink, A, Alten, R, Burmester, G, Gromnica-Ihle, E, Kellner, H, Schneider, M, Sörensen, H, Zeidler, H; Sieper, J                                                                   | 2005 |
| AB-Intra- and Post-Operative Measures of Auditory Function                                                                                                                                                                                                                                                                                                                                                            | NCT03685461                                                                                                                                                                                                                         | 2018 |
| Non-surgical periodontal therapy affects metabolic control in diabetics: a randomized controlled clinical trial                                                                                                                                                                                                                                                                                                       | Moeintaghavi, , A, Arab, HR, Bozorgnia, Y, Kianoush, K; Alizadeh, M                                                                                                                                                                 | 2012 |
| Microbiological effect of the use of an ultrasonic device and iodine irrigation in patients with severe chronic periodontal disease: a randomized controlled clinical study                                                                                                                                                                                                                                           | Leonhardt, , A, Bergström, C, Krok, L; Cardaropoli, G                                                                                                                                                                               | 2007 |
| Nicotine treatment improves Toll-like receptor 2 and Toll-like receptor 9 responsiveness in active pulmonary sarcoidosis                                                                                                                                                                                                                                                                                              | Julian, , MW, Shao, G, Schlesinger, LS, Huang, Q, Cosmar, DG, Bhatt, NY, Culver, DA, Baughman, RP, Wood, KL; Crouser, ED                                                                                                            | 2013 |
| Effect of puerarin preconditioning on cytokine levels in patients undergoing cardiopulmonary bypass in perioperative period                                                                                                                                                                                                                                                                                           | Jiang, , XX, Li, Y; Wu, YB                                                                                                                                                                                                          | 2009 |
| Pressure-Controlled vs Volume-Controlled Ventilation During One Lung Ventilation                                                                                                                                                                                                                                                                                                                                      | NCT00975468                                                                                                                                                                                                                         | 2009 |
| Prehabilitation in Esophageal Surgery (PRESS)                                                                                                                                                                                                                                                                                                                                                                         | NCT03798951                                                                                                                                                                                                                         | 2019 |
| Randomised clinical trial: the ileal bile acid transporter inhibitor A3309 vs. placebo in patients with chronic idiopathic constipation—a double-blind study                                                                                                                                                                                                                                                          | Simrén, , M, Bajor, A, Gillberg, PG, Rudling, M; Abrahamsson, H                                                                                                                                                                     | 2011 |
| Liposomal cisplatin combined with paclitaxel versus cisplatin and paclitaxel in non-small-cell lung cancer: a randomized phase III multicenter trial                                                                                                                                                                                                                                                                  | Stathopoulos, , GP, Antoniou, D, Dimitroulis, J, Michalopoulou, P, Bastas, A, Marosis, K, Stathopoulos, J, Provata, A, Yiamboudakis, P, Veldekis, D, Lolis, N, Georgatou, N, Toubis, M, Pappas, Ch; Tsoukalas, G                    | 2010 |
| Perioperative therapy in HER2+ patients                                                                                                                                                                                                                                                                                                                                                                               | A'Hern, , RP; Bundred, NJ                                                                                                                                                                                                           | 2009 |
| STAR VaS–Short Term Atorvastatin Regime for Vasculopathic Subjects: a randomized placebo-controlled trial evaluating perioperative atorvastatin therapy in noncardiac surgery                                                                                                                                                                                                                                         | Neilipovitz, , DT, Bryson, GL; Taljaard, M                                                                                                                                                                                          | 2012 |
| Peri-operative acute phase response and cytokine release in women with breast cancer: modulation by polyadenylic-polyuridylic acid                                                                                                                                                                                                                                                                                    | Khan, , AL, Larsen, F, Heys, SD; Eremin, O                                                                                                                                                                                          | 1999 |
| The Fitness, Game Bike Adherence, Motivation and Exercise Study                                                                                                                                                                                                                                                                                                                                                       | NCT01373762                                                                                                                                                                                                                         | 2011 |
| Standard Versus Intensity-Modulated Pelvic Radiation Therapy in Treating Patients With Endometrial or Cervical Cancer                                                                                                                                                                                                                                                                                                 | NCT01672892                                                                                                                                                                                                                         | 2012 |
| Pre- or Postoperative Accelerated Radiotherapy                                                                                                                                                                                                                                                                                                                                                                        | NCT03783364                                                                                                                                                                                                                         | 2018 |
| Circulating cardiac biomarkers and postoperative atrial fibrillation in the OPERA trial                                                                                                                                                                                                                                                                                                                               | Masson, , S, Wu, JH, Simon, C, Barlera, S, Marchioli, R, Mariani, J, Macchia, A, Lombardi, F, Vago, T, Aleksova, A, Dreas, L, Favalaro, RR, Hershsen, AR, Puskas, JD, Dozza, L, Silletta, MG, Tognoni, G, Mozaffarian, D; Latini, R | 2015 |
| Effects of an aquatic physical exercise program on glycemic control and perinatal outcomes of gestational diabetes: study protocol for a randomized controlled trial                                                                                                                                                                                                                                                  | da Silva, , JR, Borges, PS, Agra, KF, Pontes, IA; Alves, JG                                                                                                                                                                         | 2013 |
| Biomarkers of anti-angiogenic therapy in metastatic colorectal cancer (mCRC): original data and review of the literature                                                                                                                                                                                                                                                                                              | Pohl, , M, Werner, N, Munding, J, Tannapfel, A, Graeven, U, Nickenig, G, Schmiegel, W; Reinacher-Schick, A                                                                                                                          | 2011 |
| Sequential combined treatment with allopurinol and benznidazole in the chronic phase of Trypanosoma cruzi infection: a pilot study                                                                                                                                                                                                                                                                                    | Perez-Mazliah, , DE, Alvarez, MG, Cooley, G, Lococo, BE, Bertocchi, G, Petti, M, Albareda, MC, Armenti, AH, Tarleton, RL, Laucella, SA; Viotti, R                                                                                   | 2013 |
| Treatment of HIV/AIDS patients with Glutamine Dipeptide                                                                                                                                                                                                                                                                                                                                                               | RBR-843tnq                                                                                                                                                                                                                          | 2015 |
| A study to assess the safety and tolerability of combining G1T28 with etoposide and carboplatin therapy and to evaluate the effect of G1T28 on blood cell production affected by chemotherapy                                                                                                                                                                                                                         | EUCTR2016-001583-11-HU                                                                                                                                                                                                              | 2016 |
| An Open-Label, Study to Evaluate safety and efficacy of Edoxaban tosylate in children with heart disease at risk of a blood clot                                                                                                                                                                                                                                                                                      | EUCTR2017-000475-90-ES                                                                                                                                                                                                              | 2017 |
| Melatonin reduces oxidative stress in surgical neonates                                                                                                                                                                                                                                                                                                                                                               | Gitto, , E, Romeo, C, Reiter, RJ, Impellizzeri, P, Pesce, S, Basile, M, Antonuccio, P, Trimarchi, G, Gentile, C, Barberi, I; Zuccarello, B                                                                                          | 2004 |
| Efficacy and safety of pimecrolimus cream in the long-term management of atopic dermatitis in children                                                                                                                                                                                                                                                                                                                | Wahn, , U, Bos, JD, Goodfield, M, Caputo, R, Papp, K, Manjra, A, Dobozy, A, Paul, C, Molloy, S, Huelsch, T, Graeber, M, Cherill, R; de Prost, Y                                                                                     | 2002 |
| Cediranib or placebo in combination with cisplatin and gemcitabine chemotherapy for patients with advanced biliary tract cancer (ABC-03): a randomised phase 2 trial                                                                                                                                                                                                                                                  | Valle, , JW, Wasan, H, Lopes, A, Backen, AC, Palmer, DH, Morris, K, Duggan, M, Cunningham, D, Anthony, DA, Corrie, P, Madhusudan, S, Maraveyas, A, Ross, PJ, Waters, JS, Steward, WP, Rees, C, Beare, S, Dive, C; Bridgewater, JA   | 2015 |
| SB-480848/026: an International, Multicenter, Randomized, Placebo-controlled, Parallel-group, 1 Year Treatment, Integrated Biomarkers and Imaging Study in Subjects with Angiographically Documented Coronary Heart Disease (CHD) to Examine the Effects of the Novel Lipoprotein-associated Phospholipase A2 (Lp-PLA2) inhibitor SB-480848 on Intermediate Cardiovascular Endpoints, Patient Safety and Tolerability | EUCTR2005-001556-20-DE                                                                                                                                                                                                              | 2005 |
| The effect of non-surgical periodontal therapy on periodontal status and systemic metabolic status in end-stage renal disease patients                                                                                                                                                                                                                                                                                | ChiCTR-TRC-14005045                                                                                                                                                                                                                 | 2014 |

|                                                                                                                                                                                                                                                                                                                                                                                     |                                                                                                        |      |
|-------------------------------------------------------------------------------------------------------------------------------------------------------------------------------------------------------------------------------------------------------------------------------------------------------------------------------------------------------------------------------------|--------------------------------------------------------------------------------------------------------|------|
| Randomized study to assess the added value of Laromustine in combination with standard remission-induction chemotherapy in patients aged 18-65 years with previously untreated acute myeloid leukemia (AML) or myelodysplasia (MDS) (RAEB with IPSS $\geq$ 1.5)                                                                                                                     | NTR1446                                                                                                | 2008 |
| treatment of gum disease/ pyorrhoecia                                                                                                                                                                                                                                                                                                                                               | CTRI/2017/03/008231                                                                                    | 2017 |
| Exploration of TNF-alpha Blockade with golimumab in the Induction of Clinical Remission in Patients with Early Peripheral Spondyloarthritis (SpA) according to ASAS-criteria                                                                                                                                                                                                        | EUCTR2011-003678-97-BE                                                                                 | 2011 |
| Treating bone defects in patients with gum diseases using bone graft                                                                                                                                                                                                                                                                                                                | CTRI/2018/04/013441                                                                                    | 2018 |
| Effect of pomegranate supplement on Rheumatoid Arthritis patients                                                                                                                                                                                                                                                                                                                   | IRCT201202183236N2                                                                                     | 2012 |
| Eliminating periodontal infection in patients with type 2 diabetes                                                                                                                                                                                                                                                                                                                  | ISRCTN57210949                                                                                         | 2010 |
| An Open-Label, Study to Evaluate safety and efficacy of Edoxaban tosylate in children with heart disease at risk of a blood clot                                                                                                                                                                                                                                                    | EUCTR2017-000475-90-HU                                                                                 | 2017 |
| The effect of peri-operative anti-inflammatory treatment on postoperative muscle weakness and muscle fatigue in elderly elective surgery patients                                                                                                                                                                                                                                   | ISRCTN51508868                                                                                         | 2011 |
| Response to Optimal Selection of neo-adjuvant Chemotherapy in Operable breast cancer                                                                                                                                                                                                                                                                                                | EUCTR2013-004307-39-GB                                                                                 | 2015 |
| The effect of vitamin D supplementation in Non Alcoholic Fatty Liver Disease treatment                                                                                                                                                                                                                                                                                              | IRCT2012071810333N1                                                                                    | 2012 |
| A multicenter randomized phase III trial of neo-adjuvant chemotherapy followed by surgery and chemotherapy or by surgery and chemoradiotherapy in resectable gastric cancer (CRITICS-study: chemoRadiotherapy after Induction chemoTherapy In Cancer of the Stomach) - CRITICS                                                                                                      | EUCTR2006-004130-32-DK                                                                                 | 2010 |
| A clinical trial to study the effect of periodontal treatment on rheumatoid arthritis disease                                                                                                                                                                                                                                                                                       | CTRI/2017/01/007713                                                                                    | 2017 |
| A RANDOMIZED MULTICENTER, DOUBLE-BLIND, PLACEBO-CONTROLLED COMPARISON OF CHEMOTHERAPY PLUS TRASTUZUMAB PLUS PLACEBO VERSUS CHEMOTHERAPY PLUS TRASTUZUMAB PLUS PERTUZUMAB AS ADJUVANT THERAPY IN PATIENTS WITH OPERABLE HER2-POSITIVE PRIMARY BREAST CANCER                                                                                                                          | PER-092-11                                                                                             | 2011 |
| Biomarkers in diagnosis & treatment of patients with Crohn's disease treated with immunosuppressants                                                                                                                                                                                                                                                                                | EUCTR2011-003966-34-ES                                                                                 | 2011 |
| Randomized phase 3 clinical trial for patients with metastasized childhood renal tumour                                                                                                                                                                                                                                                                                             | EUCTR2018-000533-13-DE                                                                                 | 2018 |
| A randomised, double-blind, placebo-controlled, parallel-group study to investigate the effect of Symbicort® and Pulmicort® on HAT and HDAC expression and activity in induced sputum cells obtained from COPD patients                                                                                                                                                             | EUCTR2005-003297-13-GB                                                                                 | 2005 |
| Humoral immune response during coronary artery bypass grafting: a comparison of limited approach, "off-pump" technique, and conventional cardiopulmonary bypass                                                                                                                                                                                                                     | Diegeler, , A, Doll, N, Rauch, T, Haberer, D, Walther, T, Falk, V, Gummert, J, Autschbach, R; Mohr, FW | 2000 |
| A clinical trial to study the effect of a drug, curcumin in patients with periodontitis                                                                                                                                                                                                                                                                                             | CTRI/2019/01/016927                                                                                    | 2019 |
| Prevention of the return of nephrotic syndrom in children by adding levamisole to the prednisolone treatment                                                                                                                                                                                                                                                                        | EUCTR2017-001025-41-NL                                                                                 | 2017 |
| CIMAvax-EGF(R) in metastatic asymptomatic or mildly symptomatic Castration Resistant Prostate Cancer patients. Phase II-III Clinical Trial                                                                                                                                                                                                                                          | RPCEC00000291                                                                                          | 2018 |
| Periodontal therapy in diabetic subjects                                                                                                                                                                                                                                                                                                                                            | ISRCTN11742127                                                                                         | 2008 |
| Myocardial and lung injury after cardiopulmonary bypass: role of interleukin (IL)-10                                                                                                                                                                                                                                                                                                | Giomarelli, , P, Scolletta, S, Borrelli, E; Biagioli, B                                                | 2003 |
| Suppression of the hormone aldosterone to diminish scar tissue in heart in patients with atrial fibrillation                                                                                                                                                                                                                                                                        | EUCTR2013-000797-30-DK                                                                                 | 2013 |
| The Effect of Grape Seed and Grapefruit Seed Extracts on Bone Regeneration: randomized clinical trial                                                                                                                                                                                                                                                                               | RBR-56q7h9                                                                                             | 2017 |
| Uncemented total hip implant and subcutaneous injection of Denosumab for patients with degenerative joint disease of the hip. A randomised double blind placebo controlled study on the effects on bone evaluated with bone densitometry, uptake of Fluoride isotop measure with Positron Emission Tomography and Computed Tomography, and blood samples analyzed for bone turnover | EUCTR2011-001481-18-SE                                                                                 | 2011 |
| A PHASE, DOUBLE-BLIND, PLACEBO-CONTROLLED, MULTI-CENTER, RANDOMIZED WITHDRAWAL DESIGN TRIAL USING ADAPTIVE RANDOMIZATION COMPARING Z102 WITH PLACEBO IN PATIENTS WITH MODERATE TO SEVERE RHEUMATOID ARTHRITIS                                                                                                                                                                       | PER-009-12                                                                                             | 2012 |
| A study to assess the safety and efficacy of a new medicine SBT-020 in patients with Early Stage Huntington's Disease                                                                                                                                                                                                                                                               | EUCTR2016-003730-25-NL                                                                                 | 2017 |
| Non-surgical periodontal therapy in rheumatoid arthritis patients                                                                                                                                                                                                                                                                                                                   | ISRCTN60187959                                                                                         | 2016 |
| Chinese herbal medicine bi min fang for allergic rhinitis: protocol for a double-blind, double-dummy, randomized controlled trial                                                                                                                                                                                                                                                   | Luo, , Q, Zhou, S, Li, X, Chen, Q, Lin, W, Lu, L, Li, H, Chen, C, Chen, W; Li, Y                       | 2019 |

|                                                                                                                                                                                                                                                                                                               |                                                                                                                                                                                                          |      |
|---------------------------------------------------------------------------------------------------------------------------------------------------------------------------------------------------------------------------------------------------------------------------------------------------------------|----------------------------------------------------------------------------------------------------------------------------------------------------------------------------------------------------------|------|
| Use of circulating tumour DNA (ctDNA) results to inform the decision for adjuvant chemotherapy in patients with locally advanced rectal cancer who have been treated with pre-operative chemo-radiation and surgery                                                                                           | ACTRN12617001560381                                                                                                                                                                                      | 2017 |
| Alternatives to prophylactic antibiotics for the treatment of recurrent urinary tract infection in women                                                                                                                                                                                                      | EUCTR2015-003487-36-GB                                                                                                                                                                                   | 2015 |
| Efficacy of enteral nutrition in adult Ileal Crohn's disease- the RICE study                                                                                                                                                                                                                                  | ACTRN12616000251426                                                                                                                                                                                      | 2016 |
| Evaluation of efficacy and safety of using Nintedanib (Vargatef®) as part of the neoadjuvant and adjuvant treatment surrounding interval debulking surgery in patients with advanced ovarian cancer                                                                                                           | EUCTR2011-006288-23-FR                                                                                                                                                                                   | 2012 |
| Surgical treatment for secundum atrial septal defects in patients >40 years old. A randomized clinical trial                                                                                                                                                                                                  | Attie, F, Rosas, M, Granados, N, Zabal, C, Buendía, A; Calderón, J                                                                                                                                       | 2001 |
| Randomized study with a run-in feasibility phase to assess the added value of Clofarabine in combination with standard remission-induction chemotherapy in patients aged 18-65 years with previously untreated acute myeloid leukemia (AML) or myelodysplasia (MDS) (RAEB with IPSS =>1.5)                    | NTR2187                                                                                                                                                                                                  | 2010 |
| Effect of ginger supplementation in treatment of type 2 diabetic patients with chronic periodontitis                                                                                                                                                                                                          | IRCT20170304032874N2                                                                                                                                                                                     | 2018 |
| The Effect of Alogliptin on Cardiovascular Disease in Patients with Acute Coronary Syndromes                                                                                                                                                                                                                  | JPRN-UMIN000010093                                                                                                                                                                                       | 2013 |
| Open randomised phase II study evaluating the anti-tumour activity, safety and pharmacology of two different dose regimens of IPH 2101, a human monoclonal anti-KIR antibody, in patients with multiple myeloma in stable partial response after a first line therapy                                         | EUCTR2009-012136-33-FR                                                                                                                                                                                   | 2009 |
| Upfront debulking surgery versus neoadjuvant chemotherapy in ovarian cancer                                                                                                                                                                                                                                   | ISRCTN67331344                                                                                                                                                                                           | 2010 |
| A Randomized Phase III Study Comparing Conventional Dose Treatment Using a Combination of Lenalidomide, Bortezomib and Dexamethasone (RVD) to High-Dose Treatment with Peripheral Stem Cell Transplant in the Initial Management of Myeloma in Patients up to 65 Years of Age (IFM/DFCI 2009) - IFM/DFCI 2009 | EUCTR2009-016871-32-FR                                                                                                                                                                                   | 2010 |
| Randomised, double-blind, multicentric phase III trial evaluating the safety and benefit of adding everolimus to adjuvant hormone therapy in women with poor prognosis, ER+ and HER2- primary breast cancer who remain free of disease                                                                        | EUCTR2012-003187-44-BE                                                                                                                                                                                   | 2013 |
| Trial of Perioperative Endocrine Therapy - Individualising Care (POETIC)                                                                                                                                                                                                                                      | EUCTR2007-003877-21-GB                                                                                                                                                                                   | 2008 |
| The effect of Ginger supplementation in the treatment of type 2 Diabetic patients with Periodontitis                                                                                                                                                                                                          | IRCT2017030432874N1                                                                                                                                                                                      | 2017 |
| Survivors of intensive care with type 2 diabetes and the effect of shared care follow-up clinics: the SWEET-AS feasibility study                                                                                                                                                                              | ACTRN12616000206426                                                                                                                                                                                      | 2016 |
| Circulating Tumour DNA Analysis Informing Adjuvant Chemotherapy in Early Stage Pancreatic Cancer: a Multicentre Randomised Study (DYNAMIC- Pancreas)                                                                                                                                                          | ACTRN12618000335291                                                                                                                                                                                      | 2018 |
| Surgery alone In low rectal cancer                                                                                                                                                                                                                                                                            | ISRCTN02406823                                                                                                                                                                                           | 2013 |
| Single Center Pilot Clinical Trial on cell therapy in acute ictus                                                                                                                                                                                                                                             | EUCTR2011-003551-18-ES                                                                                                                                                                                   | 2011 |
| A study to determine the interrelationship between diabetes and gum disease                                                                                                                                                                                                                                   | CTRI/2014/08/004849                                                                                                                                                                                      | 2014 |
| The SSTARS (STeroids and Stents Against Re-Stenosis) Trial: different stent alloys and the use of peri-procedural oral corticosteroids to prevent in-segment restenosis after percutaneous coronary intervention                                                                                              | Adam, Z, Turley, A, Mason, JM, Kasim, AS, Newby, D, Mills, N, Padfield, G, Thompson, L, Morley, R, Hall, JA, Wright, RA, Muir, DF, Sutton, AG, Swanson, N, Carter, J, Bilous, R, Jones, S; de Belder, MA | 2016 |
| Preexisting levels of CD4 T cells expressing PD-1 are related to overall survival in prostate cancer patients treated with ipilimumab                                                                                                                                                                         | Kwek, SS, Lewis, J, Zhang, L, Weinberg, V, Greaney, SK, Harzstark, AL, Lin, AM, Ryan, CJ, Small, EJ, Fong, L                                                                                             | 2015 |
| Photobiomodulation therapy (PBMT) on acute pain and inflammation in patients who underwent total hip arthroplasty—a randomized, triple-blind, placebo-controlled clinical trial                                                                                                                               | Langella, LG, Casalechi, HL, Tomazoni, SS, Johnson, DS, Albertini, R, Pallotta, RC, Marcos, RL, de Carvalho, PTC; Leal-Junior, ECP                                                                       | 2018 |
| Effects of gastric bypass followed by a randomized study of physical training on markers of coagulation activation, fibrin clot properties, and fibrinolysis                                                                                                                                                  | Stolberg, CR, Mundbjerg, LH, Funch-Jensen, P, Gram, B, Juhl, CB; Bladbjerg, EM                                                                                                                           | 2018 |
| The anti-inflammatory effect of bradykinin preconditioning in coronary artery bypass grafting (bradykinin and preconditioning)                                                                                                                                                                                | Wang, X, Wei, M, Kuukasjärvi, P, Laurikka, J, Rinne, T, Moilanen, E; Tarkka, M                                                                                                                           | 2009 |
| 3-day versus 5-day course of intravenous antibiotics for suspected early onset neonatal sepsis: a randomized controlled trial                                                                                                                                                                                 | Pasha, YZ, Ahmadpour-Kacho, M, Behmadi, R; Jahangir, T                                                                                                                                                   | 2014 |
| Plasma Glutathione Peroxidase (GPX1) Levels and Oxidative Stress in Gallstone Patients Operated with Two Different Cholecystectomy Techniques: a Randomized Study with Special Reference to Cancer Patients                                                                                                   | Kärkkäinen, J, Aspinen, S, Harju, J, Juvonen, P, Pulkki, K; Eskelinen, M                                                                                                                                 | 2017 |
| Inflammatory response to surgical trauma in patients with minilaparotomy cholecystectomy versus laparoscopic cholecystectomy: a randomised multicentre study                                                                                                                                                  | Aspinen, S, Kinnunen, M, Harju, J, Juvonen, P, Selander, T, Holopainen, A, Kokki, H, Pulkki, K; Eskelinen, M                                                                                             | 2016 |
| Teriparatide and osseous regeneration in the oral cavity                                                                                                                                                                                                                                                      | Bashutski, JD, Eber, RM, Kinney, JS, Benavides, E, Maitra, S, Braun, TM, Giannobile, WV; McCauley, LK                                                                                                    | 2010 |

|                                                                                                                                                                                                                                     |                                                                                                                                                                                                                                                                                                         |      |
|-------------------------------------------------------------------------------------------------------------------------------------------------------------------------------------------------------------------------------------|---------------------------------------------------------------------------------------------------------------------------------------------------------------------------------------------------------------------------------------------------------------------------------------------------------|------|
| Relationship between periodontitis and rheumatoid arthritis and the effect of non-surgical periodontal treatment                                                                                                                    | Pinho Mde, , N, Oliveira, RD, Novaes, AB; Voltarelli, JC                                                                                                                                                                                                                                                | 2009 |
| Does preoperative oral carbohydrate treatment reduce the postoperative surgical stress response in lumbar disc surgery?                                                                                                             | Dilmen, , OK, Yentur, E, Tunali, Y, Balci, H; Bahar, M                                                                                                                                                                                                                                                  | 2017 |
| Early nasogastric feeding in predicted severe acute pancreatitis: a clinical, randomized study                                                                                                                                      | Eckerwall, , GE, Axelsson, JB; Andersson, RG                                                                                                                                                                                                                                                            | 2006 |
| A prospective randomized study of the inflammatory responses to multiport and singleport laparoscopic hysterectomies                                                                                                                | Tormena, , RA, Ribeiro, SC, Soares, JM, Maciel, GAR; Baracat, EC                                                                                                                                                                                                                                        | 2017 |
| Efficacy of long-term remote ischaemic conditioning on vascular and neuronal function in type 2 diabetes patients with peripheral arterial disease                                                                                  | Hansen, , C, Jorgense, ME, Fleischer, J, Botker, H; Rossing, P                                                                                                                                                                                                                                          | 2018 |
| Efficacy of Early Enteral Immunonutrition on Immune Function and Clinical Outcome for Postoperative Patients With Gastrointestinal Cancer                                                                                           | Luo, , Z, Wang, J, Zhang, Z, Li, H, Huang, L, Qiao, Y, Wang, D, Huang, J, Guo, L, Liu, J, Liu, Y; Zhang, Y                                                                                                                                                                                              | 2017 |
| Compliance with enhanced recovery after surgery criteria and preoperative and postoperative counselling reduces length of hospital stay in colorectal surgery: results of a randomized controlled trial                             | Forsmo, , HM, Pfeffer, F, Rasdal, A, Østgaard, G, Mohn, AC, Körner, H; Erichsen, C                                                                                                                                                                                                                      | 2016 |
| Sivelestat attenuates lung injury in surgery for congenital heart disease with pulmonary hypertension                                                                                                                               | Nomura, , N, Asano, M, Saito, T, Nakayama, T; Mishima, A                                                                                                                                                                                                                                                | 2013 |
| Perfusion Pressure Cerebral Infarct (PPCI) trial - the importance of mean arterial pressure during cardiopulmonary bypass to prevent cerebral complications after cardiac surgery: study protocol for a randomised controlled trial | Vedel, , AG, Holmgaard, F, Rasmussen, LS, Paulson, OB, Thomsen, C, Danielsen, ER, Langkilde, A, Goetze, JP, Lange, T, Ravn, HB; Nilsson, JC                                                                                                                                                             | 2016 |
| The effect of periodontal therapy on C-reactive protein, endothelial function, lipids and proinflammatory biomarkers in patients with stable coronary artery disease: study protocol for a randomized controlled trial              | Saffi, , MA, Furtado, MV, Montenegro, MM, Ribeiro, IW, Kampits, C, Rabelo-Silva, ER, Polanczyk, CA, Rösing, CK; Haas, AN                                                                                                                                                                                | 2013 |
| Second-versus first-generation "limus"-eluting stents in diabetic patients with coronary artery disease: a randomized comparison in setting of ISAR-TEST-4 trial                                                                    | Kufner, , S, Byrne, RA, Mehili, J, Massberg, S, Birkmeier, KA, Schulz, S, Pache, J, Schomig, A; Kastrati, A                                                                                                                                                                                             | 2013 |
| Periodontal tissue regeneration using fibroblast growth factor-2: randomized controlled phase II clinical trial                                                                                                                     | Kitamura, , M, Nakashima, K, Kowashi, Y, Fujii, T, Shimauchi, H, Sasano, T, Furuuchi, T, Fukuda, M, Noguchi, T, Shibutani, T, Iwayama, Y, Takashiba, S, Kurihara, H, Ninomiya, M, Kido, J, Nagata, T, Hamachi, T, Maeda, K, Hara, Y, Izumi, Y, Hirofujii, T, Imai, E, Omae, M, Watanuki, M; Murakami, S | 2008 |
| Reducing the post-pump syndrome by using heparin-coated circuits, steroids, or aprotinin                                                                                                                                            | Harig, , F, Feyrer, R, Mahmoud, FO, Blum, U; von der Emde, J                                                                                                                                                                                                                                            | 1999 |
| Beneficial effects of clopidogrel combined with aspirin in reducing cerebral emboli in patients undergoing carotid endarterectomy                                                                                                   | Payne, , DA, Jones, CI, Hayes, PD, Thompson, MM, London, NJ, Bell, PR, Goodall, AH; Naylor, AR                                                                                                                                                                                                          | 2004 |
| Ultrasonographic Changes at 12 Weeks of Anti-TNF Drugs Predict 1-year Sonographic Response and Clinical Outcome in Crohn's Disease: a Multicenter Study                                                                             | Ripolles, , T, Paredes, JM, Martinez-Perez, MJ, Rimola, J, Jauregui-Amezaga, A, Bouzas, R, Martin, G; Moreno-Osset, E                                                                                                                                                                                   | 2016 |
| Aggressive clinical approach to obesity improves metabolic and clinical outcomes and can prevent bariatric surgery: a single center experience                                                                                      | Cadegiani, , FA, Diniz, GC; Alves, G                                                                                                                                                                                                                                                                    | 2017 |
| Non-surgical periodontal therapy reduces coronary heart disease risk markers: a randomized controlled trial                                                                                                                         | Bokhari, , SA, Khan, AA, Butt, AK, Azhar, M, Hanif, M, Izhar, M; Tatakis, DN                                                                                                                                                                                                                            | 2012 |
| Bone resorption following weight loss surgery is associated with treatment procedure and changes in secreted Wnt antagonists                                                                                                        | Hofso, , D, Bollerslev, J, Sandbu, R, Jørgensen, A, Godang, K, Hjeltnes, J; Ueland, T                                                                                                                                                                                                                   | 2016 |
| GnRH analogues, transvaginal ultrasound-guided drainage and intracystic injection of recombinant interleukin-2 in the treatment of endometriosis                                                                                    | Acien, , P, Quereda, FJ, Gómez-Torres, MJ, Bermejo, R; Gutierrez, M                                                                                                                                                                                                                                     | 2003 |
| Routine drainage of the subhepatic area after laparoscopic cholecystectomy. Prospective, controlled study with random patient selection                                                                                             | Mrozowicz, , A, Rucinski, P; Polkowski, WP                                                                                                                                                                                                                                                              | 2006 |
| Adaptive servo-ventilation suppresses elevation of C-reactive protein and sympathetic activity in acute uncomplicated type B aortic dissection                                                                                      | Hiraoka, , A, Suzuki, K, Chikazawa, G, Nogami, S, Sakaguchi, T; Yoshitaka, H                                                                                                                                                                                                                            | 2017 |
| Cardiovascular events and biomarkers in a randomized trial comparing LHRH agonist and antagonist among patients with advanced prostate cancer                                                                                       | Margel, , D, Pe'er, A, Ber, Y, Shapargberg, M, Sela, S, Ozalvo, R, Tabachnik, T, Duivenvoorden, W, Pinthus, J; Baniel, J                                                                                                                                                                                | 2018 |
| Congenital hyperinsulinism in children with paternal 11p uniparental isodisomy and Beckwith- Wiedemann syndrome                                                                                                                     | Kalish, , JM, Boodhansingh, KE, Bhatti, TR, Ganguly, A, Conlin, LK, Becker, SA, Givler, S, Mighion, L, Palladino, AA, Adzick, NS, De Leon, DD, Stanley, CA; Deardorff, MA                                                                                                                               | 2016 |
| Contrasted outcomes to gefitinib on tumoral IGF1R expression in head and neck cancer patients receiving postoperative chemoradiation (GORTEC trial 2004-02)                                                                         | Thariat, , J, Bensadoun, RJ, Etienne-Grimaldi, MC, Grall, D, Penault-Llorca, F, Dassonville, O, Bertucci, F, Cayre, A, De Raucourt, D, Geoffrois, L, Finetti, P, Giraud, P, Racadot, S, Morinière, S, Sudaka, A, Van Obberghen-Schilling, E; Milano, G                                                  | 2012 |
| Management of endometriosis-associated infertility                                                                                                                                                                                  | Surrey, , ES; Schoolcraft, WB                                                                                                                                                                                                                                                                           | 2003 |
| Effect of lamivudine against HBV reinfection after liver transplantation                                                                                                                                                            | Lu, , S-C, Yan, L-N, Li, B, Wen, T-F, Zhao, J-C, Cheng, N-S, Liu, C, Liu, J, Wang, X-B, Li, X-D, Qin, S, Zhao, L-S, Lei, B-J; Zhang, X-H                                                                                                                                                                | 2003 |
| The role of leukocyte depleting filters in heart transplantation: early outcomes in prospective, randomized clinical trial                                                                                                          | Dvorak, , L, Pirk, J, Cerny, S; Kovar, J                                                                                                                                                                                                                                                                | 2006 |
| RETRACTED: how does high-concentration supplemental perioperative oxygen influence surgical outcomes after thyroid surgery? A prospective, randomized, double-blind, controlled, monocentric trial                                  | Schietroma, , M, Piccione, F, Cecilia, EM, Carlei, F, De Santis, G, Sista, F; Amicucci, G                                                                                                                                                                                                               | 2015 |
| Targeting nonhealing ulcers of lower extremity in human through autologous bone marrow-derived mesenchymal stem cells                                                                                                               | Dash, , NR, Dash, SN, Routray, P, Mohapatra, S; Mohapatra, PC                                                                                                                                                                                                                                           | 2009 |

|                                                                                                                                                                                                        |                                                                                                                                                                                                                                                                                                  |      |
|--------------------------------------------------------------------------------------------------------------------------------------------------------------------------------------------------------|--------------------------------------------------------------------------------------------------------------------------------------------------------------------------------------------------------------------------------------------------------------------------------------------------|------|
| Ischemic brain lesions after carotid artery stenting increase future cerebrovascular risk                                                                                                              | Gensicke, , H, Van Der Worp, HB, Nederkoorn, PJ, Macdonald, S, Gaines, PA, Van Der Lugt, A, Mali, WPTM, Lyrer, PA, Peters, N, Featherstone, RL, De Borst, GJ, Engelter, ST, Brown, MM; Bonati, LH                                                                                                | 2015 |
| Pre-emptive treatment of fungal infection based on plasma $\beta$ -D-glucan levels after gastric surgery for gastric cancer in elderly patients                                                        | Namikawa, , T, Kitagawa, H, Yamatsuji, T, Naomoto, Y, Kobayashi, M; Hanazaki, K                                                                                                                                                                                                                  | 2013 |
| Preoperative chemotherapy is safe in early breast cancer, even after 10 years of follow-up; clinical and translational results from the EORTC trial 10902                                              | van Nes, , JG, Putter, H, Julien, JP, Tubiana-Hulin, M, van de Vijver, M, Bogaerts, J, de Vos, M; van de Velde, CJ                                                                                                                                                                               | 2009 |
| Muscadine Grape Seed Supplementation and Vascular Function                                                                                                                                             | NCT01011517                                                                                                                                                                                                                                                                                      | 2009 |
| Non-surgical periodontal therapy reduces coronary heart disease risk markers: a randomized controlled trial                                                                                            | Bokhari, , SA, Khan, AA, Butt, AK, Azhar, M, Hanif, M, Izhar, M; Tatakis, DN                                                                                                                                                                                                                     | 2013 |
| Role of serum interleukin-6 in comparing surgical stress after laparoscopic-assisted vaginal hysterectomy and non-descent vaginal hysterectomy for large uteri                                         | Roy, , KK, Subbaiah, M, Singla, S, Kumar, S, Sharma, JB; Mitra, DK                                                                                                                                                                                                                               | 2012 |
| The effect of ulinastatin on hyperglycemia in patients undergoing hepatectomy                                                                                                                          | Zhao, , G, Zhu, Y, Yu, D; Ma, J                                                                                                                                                                                                                                                                  | 2015 |
| Propolis Improves Glycemic Control in Subjects With Type 2 Diabetes and Chronic Periodontitis                                                                                                          | NCT02794506                                                                                                                                                                                                                                                                                      | 2016 |
| 3-D implantable marker provides benefits for radiation targeting and cosmesis                                                                                                                          | Kaufman, , C, Cross, M, Dekhne, N, Devisetty, K, Edmonson, D, Gass, J, Graham, C, Gold, L, Goyal, S, Hall, W, Hong, R, Jones, S, Kuske, R, Pandya, S, Phillips, R, Schonholz, S, Smith, L; Tafta, L                                                                                              | 2017 |
| Rosuvastatin for Reduction of Myocardial Damage during Coronary Angioplasty - the Remedy Trial                                                                                                         | Briguori, , C, Madonna, R, Zimarino, M, Calabrò, P, Quintavalle, C, Salomone, M, Condorelli, G; De Caterina, R                                                                                                                                                                                   | 2016 |
| Clinical response to infliximab after secondary failure with adalimumab or certolizumab pegol in crohn's disease                                                                                       | Trivella, , J, Yarur, A, Moroney, J, Deshpande, A, Abreu, M; Sussman, D                                                                                                                                                                                                                          | 2013 |
| Chronic lower extremity ischemia: a human model of ischemic tolerance                                                                                                                                  | Badhwar, , A, Forbes, TL, Lovell, MB, Dungey, AA, McCarter, SD, Scott, JR, DeRose, G, Harris, KA; Potter, RF                                                                                                                                                                                     | 2004 |
| Tripterygium wilfordii Hook. f. versus azathioprine for prevention of postoperative recurrence in patients with Crohn's disease: a randomized clinical trial                                           | Zhu, , W, Li, Y, Gong, J, Zuo, L, Zhang, W, Cao, L, Gu, L, Guo, Z, Li, N; Li, J                                                                                                                                                                                                                  | 2015 |
| Prednisone Versus Doxycycline in the Treatment of Graves' Orbitopathy                                                                                                                                  | NCT01809444                                                                                                                                                                                                                                                                                      | 2012 |
| Effects of preoperative short term use of atorvastatin on endothelial progenitor cells after coronary surgery: a randomized, controlled trial                                                          | Baran, , Ç, Durdu, S, Dalva, K, Zaim, Ç, Dogan, A, Ocakoglu, G, Gürman, G, Arslan, Ö; Akar, AR                                                                                                                                                                                                   | 2012 |
| LongoVital in the treatment of Sjögren's syndrome                                                                                                                                                      | Pedersen, , A, Gerner, N, Palmvang, I; Hoier-Madsen, M                                                                                                                                                                                                                                           | 1999 |
| Bipolar versus monopolar transurethral resection of the prostate: a prospective randomized trial focusing on bleeding complications                                                                    | Stucki, , P, Marini, L, Mattei, A, Xafis, K, Boldini, M; Danuser, H                                                                                                                                                                                                                              | 2015 |
| Evaluation of clinical effectiveness of MIST ultrasound therapy for the healing of chronic wounds                                                                                                      | Ennis, , WJ, Valdes, W, Gainer, M; Meneses, P                                                                                                                                                                                                                                                    | 2006 |
| Greater improvement in LRRK2 G2019S patients undergoing Subthalamic Nucleus Deep Brain Stimulation compared to non-mutation carriers                                                                   | Sayad, , M, Zouambia, M, Chaouch, M, Ferrat, F, Nebbal, M, Bendini, M, Lesage, S, Brice, A, Brahim Errahmani, M; Asselah, B                                                                                                                                                                      | 2016 |
| Perioperative use of a beta blocker in coronary artery bypass grafting                                                                                                                                 | Ogawa, , S, Okawa, Y, Goto, Y, Aoki, M; Baba, H                                                                                                                                                                                                                                                  | 2013 |
| Effect of low molecular weight heparin (Certoparin) versus unfractionated heparin on cancer survival following breast and pelvic cancer surgery: a prospective randomized double-blind trial           | von Tempelhoff, , GF, Harenberg, J, Niemann, F, Hommel, G, Kirkpatrick, CJ; Heilmann, L                                                                                                                                                                                                          | 2000 |
| Effects of anti-CD4 antibody treatment on lymphocyte subsets and stimulated tumor necrosis factor alpha production: a study of 29 multiple sclerosis patients entered into a clinical trial of cM-T412 | Llewellyn-Smith, , N, Lai, M, Miller, DH, Rudge, P, Thompson, AJ; Cuzner, ML                                                                                                                                                                                                                     | 1997 |
| Does dexmedetomidine have a cardiac protective effect during non-cardiac surgery? A randomised controlled trial                                                                                        | Xu, , L, Hu, Z, Shen, J; McQuillan, PM                                                                                                                                                                                                                                                           | 2014 |
| Clinical effects of the heparin coated surface in cardiopulmonary bypass                                                                                                                               | Svenmarker, , S, Sandström, E, Karlsson, T, Jansson, E, Häggmark, S, Lindholm, R, Appelblad, M; Aberg, T                                                                                                                                                                                         | 1997 |
| Effects of remote ischemic preconditioning in high-risk patients undergoing cardiac surgery (Remote IMPACT): a randomized controlled trial                                                             | Walsh, , M, Whitlock, R, Garg, AX, Légaré, JF, Duncan, AE, Zimmerman, R, Miller, S, Fremes, S, Kieser, T, Karthikeyan, G, Chan, M, Ho, A, Nasr, V, Vincent, J, Ali, I, Lavi, R, Sessler, DI, Kramer, R, Gardner, J, Syed, S, VanHelder, T, Guyatt, G, Rao-Melacini, P, Thabane, L; Devereaux, PJ | 2016 |
| Probiotics administration following sleeve gastrectomy surgery: a randomized double-blind trial                                                                                                        | Sherf-Dagan, , S, Zelber-Sagi, S, Zilberman-Schapira, G, Webb, M, Buch, A, Keidar, A, Razi, A, Sakran, N, Goitein, D, Goldenberg, N, Mahdi, JA, Pevsner-Fischer, M, Zmora, N, Dori-Bachash, M, Segal, E, Elinav, E; Shibolet, O                                                                  | 2018 |
| SWOG S1505: a randomized phase II study of perioperative mFOLFIRINOX versus gemcitabine/nab-paclitaxel as therapy for resectable pancreatic adenocarcinoma                                             | Sohal, , D, McDonough, SL, Ahmad, SA, Gandhi, N, Beg, MS, Wang-Gillam, A, Guthrie, KA, Lowy, AM, Philip, PA; Hochster, HS                                                                                                                                                                        | 2018 |
| Hilar en-bloc resection for perihilar cholangiocarcinoma (PHCC); a single-center experience                                                                                                            | Bednarsch, , J, Czigany, Z, Schlebusch, I, Schoning, W, Ulmer, T, Amygdalos, I, Santana, DM, Meister, F, Bocker, J, Neumann, U; Lurje, G                                                                                                                                                         | 2018 |
| Impact of vitamin C on endothelial function and exercise capacity in patients with a Fontan circulation                                                                                                | Goldstein, , BH, Sandelin, AM, Golbus, JR, Warmke, N, Gooding, L, King, KK, Donohue, JE, Yu, S, Gurney, JG, Goldberg, CS, Rocchini, AP; Charpie, JR                                                                                                                                              | 2012 |
| Early ankle mobilization promotes healing in a rabbit model of achilles tendon rupture                                                                                                                 | Jielile, , J, Asilehan, B, Wupuer, A, Qianman, B, Jialihasi, A, Tangkejie, W, Maimaitiaili, A, Shawutali, N, Badelhan, A,                                                                                                                                                                        | 2016 |

|                                                                                                                                                                                                                                                                                                                       |                                                                                                                                                                                                                                                                                                                                                                                                |      |
|-----------------------------------------------------------------------------------------------------------------------------------------------------------------------------------------------------------------------------------------------------------------------------------------------------------------------|------------------------------------------------------------------------------------------------------------------------------------------------------------------------------------------------------------------------------------------------------------------------------------------------------------------------------------------------------------------------------------------------|------|
|                                                                                                                                                                                                                                                                                                                       | Niyazebieke, H, Aizezi, A, AisaiDing, A, Bakyt, Y, Aibek, R; Wuerliebieke, J                                                                                                                                                                                                                                                                                                                   |      |
| Preop CPET Testing and Exercise Training in Colorectal Patients                                                                                                                                                                                                                                                       | NCT01924897                                                                                                                                                                                                                                                                                                                                                                                    | 2013 |
| Effect of preoperative abstinence on poor postoperative outcome in alcohol misusers: randomised controlled trial                                                                                                                                                                                                      | Tonnesen, , H, Rosenberg, J, Nielsen, HJ, Rasmussen, V, Hauge, C, Pedersen, IK; Kehlet, H                                                                                                                                                                                                                                                                                                      | 1999 |
| Treatment of scleroderma                                                                                                                                                                                                                                                                                              | Sapadin, , AN; Fleischmajer, R                                                                                                                                                                                                                                                                                                                                                                 | 2002 |
| Does Rectus Sheath Block Analgesia Alter Levels of the Oxidative Stress Biomarker Glutathione Peroxidase: a Randomised Trial of Patients with Cancer and Benign Disease                                                                                                                                               | Purdy, , M, Kärkkäinen, J, Kokki, M, Anttila, M, Aspinen, S, Juvonen, P, Kokki, H, Pulkki, K, Rantanen, T; Eskelinen, M                                                                                                                                                                                                                                                                        | 2017 |
| Prospective Randomized Trial Comparing Three-port and Single-port TEP Repair in Adults                                                                                                                                                                                                                                | NCT01591395                                                                                                                                                                                                                                                                                                                                                                                    | 2012 |
| The efficacy of human atrial natriuretic peptide in patients with renal dysfunction undergoing cardiac surgery                                                                                                                                                                                                        | Izumi, , K, Eishi, K, Yamachika, S, Hashizume, K, Tada, S, Yamane, K, Takai, H, Tanigawa, K, Miura, T; Nakaji, S                                                                                                                                                                                                                                                                               | 2008 |
| Anti-Inflammatory Effect of Surfactant Lipid in the Vaginal Mucosa: a Pilot Study                                                                                                                                                                                                                                     | MacNeill, , C, de Guzman, GS, Lupo, K, Umstead, T, Phelps, DS; Floros, J                                                                                                                                                                                                                                                                                                                       | 2019 |
| Hypotheses, rationale, design, and methods for prognostic evaluation of cardiac biomarker elevation after percutaneous and surgical revascularization in the absence of manifest myocardial infarction. A comparative analysis of biomarkers and cardiac magnetic resonance. The MASS-V Trial                         | Hueb, , W, Gersh, BJ, Rezende, PC, Garzillo, CL, Lima, EG, Vieira, RD, Garcia, RMR, Favarato, D, Segre, CAW, Pereira, AC, Soares, PR, Ribeiro, E, Lemos, P, Perin, MA, Strunz, CC, Dallan, LAO, Jatene, FB, Stolf, NAG, Hueb, AC, Dias, R, Gaiotto, FA, da Costa, LMA, Oikawa, FTC, de Melo, RMV, Serrano Junior, CV, de Avila, LFR, Villa, AV, Filho, JRP, Nomura, C, Ramires, JAF; Filho, RK | 2012 |
| Protective effect of eicosapentaenoic acid on insulin resistance in hyperlipidemic patients and on the postoperative course of cardiac surgery patients: the possible involvement of adiponectin                                                                                                                      | Yamamoto, , T, Kajikawa, Y, Otani, S, Yamada, Y, Takemoto, S, Hirota, M, Ikeda, M, Iwagaki, H, Saito, S; Fujiwara, T                                                                                                                                                                                                                                                                           | 2014 |
| Use of ivabradine and atorvastatin in emergent orthopedic lower limb surgery and computed tomography coronary plaque imaging and novel biomarkers of cardiovascular stress and lipid metabolism for the study and prevention of perioperative myocardial infarction: study protocol for a randomized controlled trial | Rudd, , N, Subiakto, I, Asrar Ul Haq, M, Mutha, V; Van Gaal, WJ                                                                                                                                                                                                                                                                                                                                | 2014 |
| The effect of oxcarbazepine in peripheral neuropathic pain depends on pain phenotype: a randomised, double-blind, placebo-controlled phenotype-stratified study                                                                                                                                                       | Demant, , DT, Lund, K, Vollert, J, Maier, C, Segerdahl, M, Finnerup, NB, Jensen, TS; Sindrup, SH                                                                                                                                                                                                                                                                                               | 2014 |
| A 2-year follow-up results of knee arthroscopic synovectomy plus disease modifying antirheumatic drugs for the treatment of rheumatoid arthritis                                                                                                                                                                      | Chen, , GQ, Zhang, HW, Li, ZF, Yu, YT; Guo, DM                                                                                                                                                                                                                                                                                                                                                 | 2011 |
| Laryngeal cancer and angiogenesis                                                                                                                                                                                                                                                                                     | Beatrice, , F, Valente, G, Cammarota, R, Bisciari, T, Ragona, R, Giusti, U, Bussolino, F; Sartoris, A                                                                                                                                                                                                                                                                                          | 1996 |
| Amoxicillin plus clavulanic acid versus appendicectomy for treatment of acute uncomplicated appendicitis: an open-label, non-inferiority, randomised controlled trial                                                                                                                                                 | Vons, , C, Barry, C, Maitre, S, Pautrat, K, Leconte, M, Costaglioli, B, Karoui, M, Alves, A, Dousset, B, Valleur, P, Falissard, B; Franco, D                                                                                                                                                                                                                                                   | 2011 |
| Randomised, double blind, placebo controlled trial of intravenous antioxidant (n-acetylcysteine, selenium, vitamin C) therapy in severe acute pancreatitis                                                                                                                                                            | Siriwardena, , AK, Mason, JM, Balachandra, S, Bagul, A, Galloway, S, Formela, L, Hardman, JG; Jamdar, S                                                                                                                                                                                                                                                                                        | 2007 |
| Bolus high dose interleukin-2 for the treatment of malignant melanoma                                                                                                                                                                                                                                                 | Pappo, , I, Lotem, M, Klein, M; Orda, R                                                                                                                                                                                                                                                                                                                                                        | 2001 |
| Effects of Atorvastatin (80 mg) Therapy on Quantity of Epicardial Adipose Tissue in Patients Undergoing Pulmonary Vein Isolation for Atrial Fibrillation                                                                                                                                                              | Soucek, , F, Covassin, N, Singh, P, Ruzek, L, Kara, T, Suleiman, M, Lerman, A, Koestler, C, Friedman, PA, Lopez-Jimenez, F; Somers, VK                                                                                                                                                                                                                                                         | 2015 |
| The role of coagulation and inflammation after angioplasty in patients with peripheral arterial disease                                                                                                                                                                                                               | Wahlgren, , CM, Sten-Linder, M, Egberg, N, Kalin, B, Blohmé, L; Swedenborg, J                                                                                                                                                                                                                                                                                                                  | 2006 |
| Efficacy And Safety Of Smoking Cessation With Varenicline Tartrate In Diabetic Smokers: (DIASMOKE)                                                                                                                                                                                                                    | NCT01387425                                                                                                                                                                                                                                                                                                                                                                                    | 2011 |
| Early MRI in Acute Gallstone Disease                                                                                                                                                                                                                                                                                  | NCT03709030                                                                                                                                                                                                                                                                                                                                                                                    | 2018 |
| A comparison among infusion of lidocaine and dexmedetomidine alone and in combination in subjects undergoing coronary artery bypass graft: a randomized trial                                                                                                                                                         | Kim, , HJ, Kim, WH, Kim, G, Kim, E, Park, MH, Shin, BS, Sim, WS, Kim, CS, Lee, YT; Cho, HS                                                                                                                                                                                                                                                                                                     | 2014 |
| Diagnosis of cardiac surgery-associated acute kidney injury: differential roles of creatinine, chitinase 3-like protein 1 and neutrophil gelatinase-associated lipocalin: a prospective cohort study                                                                                                                  | De Loor, , J, Herck, I, Francois, K, Van Wesemael, A, Nuytinck, L, Meyer, E; Hoste, EAJ                                                                                                                                                                                                                                                                                                        | 2017 |
| Transarterial embolisation                                                                                                                                                                                                                                                                                            | Okuno, Y                                                                                                                                                                                                                                                                                                                                                                                       | 2017 |
| The Claudication: exercise Vs. Endoluminal Revascularization (CLEVER) study: rationale and methods                                                                                                                                                                                                                    | Murphy, , TP, Hirsch, AT, Ricotta, JJ, Cutlip, DE, Mohler, E, Regensteiner, JG, Comerota, AJ; Cohen, DJ                                                                                                                                                                                                                                                                                        | 2008 |
| Lack of nephrotoxicity by 6% hydroxyethyl starch 130/0.4 during hip arthroplasty: a randomized controlled trial                                                                                                                                                                                                       | Kancir, , AS, Pleckaitiene, L, Hansen, TB, Ekeløf, NP; Pedersen, EB                                                                                                                                                                                                                                                                                                                            | 2014 |
| Withdrawal of clopidogrel is not associated with rebound platelet activity in stable cardiovascular and vascular patients                                                                                                                                                                                             | Ford, , I, Scott, NW, Herd, V, Mitchell, L, Williams, DJ; Brittenden, J                                                                                                                                                                                                                                                                                                                        | 2013 |
| CYP2D6 metabolism and patient outcome in the Austrian Breast and Colorectal Cancer Study Group trial (ABCSG) 8                                                                                                                                                                                                        | Goetz, , MP, Suman, VJ, Hoskin, TL, Gnant, M, Filipits, M, Safgren, SL, Kuffel, M, Jakesz, R, Rudas, M, Greil, R, Dietze, O, Lang, A, Offner, F, Reynolds, CA, Weinshilboum, RM, Ames, MM; Ingle, JN                                                                                                                                                                                           | 2013 |
| Comparison of high reloading ROSuvastatin and Atorvastatin pretreatment in patients undergoing elective PCI to reduce the incidence of Myocardial periprocedural necrosis. The ROMA II trial                                                                                                                          | Sardella, , G, Lucisano, L, Mancone, M, Conti, G, Calcagno, S, Stio, RE, Pennacchi, M, Biondi-Zoccai, G, Canali, E; Fedele, F                                                                                                                                                                                                                                                                  | 2013 |

|                                                                                                                                                                                              |                                                                                                                                                                                                                                                                                                                                                                                                                                                                                                                          |      |
|----------------------------------------------------------------------------------------------------------------------------------------------------------------------------------------------|--------------------------------------------------------------------------------------------------------------------------------------------------------------------------------------------------------------------------------------------------------------------------------------------------------------------------------------------------------------------------------------------------------------------------------------------------------------------------------------------------------------------------|------|
| Preoperative biliary drainage by plastic or self-expandable metal stents in patients with periampullary tumors: results of a randomized clinical study                                       | Olsson, , G, Frozanpor, F, Lundell, L, Enochsson, L, Ansorge, C, Del Chiaro, M, Reuterwall-Hansson, M, Shetye, A; Arnelo, U                                                                                                                                                                                                                                                                                                                                                                                              | 2017 |
| Duloxetine for Treatment of Painful Temporomandibular Joint Disorder                                                                                                                         | NCT00981149                                                                                                                                                                                                                                                                                                                                                                                                                                                                                                              | 2009 |
| A randomized phase II study of Xilonix, a targeted therapy against interleukin 1 $\alpha$ , for the prevention of superficial femoral artery restenosis after percutaneous revascularization | El Sayed, , H, Kerensky, R, Stecher, M, Mohanty, P; Davies, M                                                                                                                                                                                                                                                                                                                                                                                                                                                            | 2016 |
| Outcome of colectomy for combined colonic inertia and pelvic floor dysfunction                                                                                                               | Fan, , C-W, Wang, J-Y, Chang-Chien, C-R, Chen, J-S, Hsu, K-C, Tang, R-P, Chiang, J-M, Yeh, C-Y; Hsieh, P-S                                                                                                                                                                                                                                                                                                                                                                                                               | 2001 |
| Surgical treatment of haemorrhoids according to Longo and Milligan Morgan: an evaluation of postoperative tissue response                                                                    | Krska, , Z, Kvasnička, J, Faltýn, J, Schmidt, D, Sváb, J, Kormanová, K; Hubík, J                                                                                                                                                                                                                                                                                                                                                                                                                                         | 2003 |
| Serum acute phase protein concentrations after hysterectomy with and without low-molecular-weight heparin thrombosis prophylaxis                                                             | Maciejczyk-Pencula, , M, Polak, G; Kotarski, J                                                                                                                                                                                                                                                                                                                                                                                                                                                                           | 2005 |
| The Kidney and Periodontal Disease (KAPD) study: a pilot randomized controlled trial testing the effect of non-surgical periodontal therapy on chronic kidney disease                        | Grubbs, , V, Garcia, F, Jue, BL, Vittinghoff, E, Ryder, M, Lovett, D, Carrillo, J, Offenbacher, S, Ganz, P, Bibbins-Domingo, K; Powe, NR                                                                                                                                                                                                                                                                                                                                                                                 | 2017 |
| Clinical and microbiological efficacy of moxifloxacin versus amoxicillin/clavulanic acid in severe odontogenic abscesses: a pilot study                                                      | Al-Nawas, , B, Walter, C, Morbach, T, Seitner, N, Siegel, E, Maeurer, M; Krummenauer, F                                                                                                                                                                                                                                                                                                                                                                                                                                  | 2009 |
| Laparoendoscopic single-site versus conventional laparoscopic total extraperitoneal hernia repair: a prospective randomized clinical trial                                                   | Tsai, , YC, Ho, CH, Tai, HC, Chung, SD; Chueh, SC                                                                                                                                                                                                                                                                                                                                                                                                                                                                        | 2013 |
| Crohn's disease activity index does not correlate with endoscopic recurrence one year after ileocolonic resection                                                                            | Regueiro, , M, Kip, KE, Schraut, W, Baidoo, L, Sepulveda, AR, Pesci, M, El-Hachem, S, Harrison, J; Binion, D                                                                                                                                                                                                                                                                                                                                                                                                             | 2011 |
| Compare the efficacy of inhaled budesonide and systemic methylprednisolone on systemic inflammation of AECOPD                                                                                | Sun, , X, He, Z, Zhang, J, Deng, J, Bai, J, Li, M; Zhong, X                                                                                                                                                                                                                                                                                                                                                                                                                                                              | 2015 |
| Effects of atorvastatin on endothelial function and the expression of proinflammatory cytokines and adhesion molecules in young subjects with successfully repaired coarctation of aorta     | Brili, , S, Tousoulis, D, Antonopoulos, AS, Antoniadis, C, Hatzis, G, Bakogiannis, C, Papageorgiou, N; Stefanadis, C                                                                                                                                                                                                                                                                                                                                                                                                     | 2012 |
| Preconditioning with sevoflurane decreases PECAM-1 expression and improves one-year cardiovascular outcome in coronary artery bypass graft surgery                                           | Garcia, , C, Julier, K, Bestmann, L, Zollinger, A, von Segesser, LK, Pasch, T, Spahn, DR; Zaugg, M                                                                                                                                                                                                                                                                                                                                                                                                                       | 2005 |
| SWOG S1505: a randomized phase II study of perioperative mFOLFIRINOX vs. gemcitabine/nab-paclitaxel as therapy for resectable pancreatic adenocarcinoma                                      | Sohal, , D, McDonough, SL, Ahmad, SA, Gandhi, N, Beg, MS, Wang-Gillam, A, Guthrie, KA, Lowy, AM, Philip, PA; Hochster, HS                                                                                                                                                                                                                                                                                                                                                                                                | 2017 |
| Anti-infective periodontal therapy promoting improvement in systemic markers of HIV infection                                                                                                | Noro Filho, , GA, Salgado, DM, Casarin, RC, Casati, MZ, Costa, C; Giovani, EM                                                                                                                                                                                                                                                                                                                                                                                                                                            | 2013 |
| Cell saver for on-pump coronary operations reduces systemic inflammatory markers: a randomized trial                                                                                         | Damgaard, , S, Nielsen, CH, Andersen, LW, Bendtzen, K, Tvede, M; Steinbrüchel, DA                                                                                                                                                                                                                                                                                                                                                                                                                                        | 2010 |
| A Double-Blinded Randomized Trial to Compare the Effectiveness of Minimally Invasive Procedures Using Patient-Reported Outcomes                                                              | Bingener, , J, Skaran, P, McConico, A, Novotny, P, Wettstein, P, Stetten, DM, Park, M, Low, P; Sloan, J                                                                                                                                                                                                                                                                                                                                                                                                                  | 2015 |
| Randomized controlled trial of comparison between the SuperPATH and posterolateral approaches in total hip arthroplasty                                                                      | Ouyang, , C, Wang, H, Meng, W, Luo, Z, Wang, D, Pei, F; Zhou, Z                                                                                                                                                                                                                                                                                                                                                                                                                                                          | 2018 |
| A poetic story: lessons learnt from the world's largest breast cancer window of opportunity study                                                                                            | Bliss, , J, Gillman, A, Kilburn, L, Morden, J, Sidhu, K, Wilcox, M, Evans, A, Holcombe, C, Horgan, K, Skene, A, Vidya, R, Robertson, J, Dowsett, M; Smith, I                                                                                                                                                                                                                                                                                                                                                             | 2015 |
| Arthroscopy and Manipulation vs a Home Therapy Program in the Treatment of Adhesive Capsulitis                                                                                               | NCT00160784                                                                                                                                                                                                                                                                                                                                                                                                                                                                                                              | 2005 |
| Tacrolimus Versus Cyclosporine for Immunosuppression After Lung Transplantation                                                                                                              | NCT01429844                                                                                                                                                                                                                                                                                                                                                                                                                                                                                                              | 2011 |
| 18F-fluoromisonidazole PET and activity of neoadjuvant nintedanib in early HER2-negative breast cancer: a window-of-opportunity randomized trial                                             | Quintela-Fandino, , M, Lluch, A, Manso, L, Calvo, I, Cortes, J, Garcia-Saenz, JA, Gil-Gil, M, Martinez-Janez, N, Gonzalez-Martin, A, Adrover, E, De Andres, R, Vinas, G, Lombart-Cussac, A, Alba, E, Guerra, J, Bermejo, B, Zamora, E, Moreno-Anton, F, Simon, SP, Carrato, A, Lopez-Alonso, A, Escudero, MJ, Campo, R, Carrasco, E, Palacios, J, Mulero, F; Colomer, R                                                                                                                                                  | 2017 |
| Stress echo 2020: the international stress echo study in ischemic and non-ischemic heart disease                                                                                             | Picano, , E, Ciampi, Q, Citro, R, D'Andrea, A, Scali, MC, Cortigiani, L, Olivetto, I, Mori, F, Galderisi, M, Costantino, MF, Pratali, L, Di Salvo, G, Bossone, E, Ferrara, F, Gargani, L, Rigo, F, Gaibazzi, N, Limongelli, G, Pacileo, G, Andreassi, MG, Pinamonti, B, Massa, L, Torres, MAR, Miglioranza, MH, Daros, CB, De Castro, E Silva Pretto JL, Beleslin, B, Djordjevic-Dikic, A, Varga, A, Palinkas, A, Agoston, G, Gregori, D, Trambaiolo, P, Severino, S, Arystan, A, Paterni, M, Carpeggiani, C; Colonna, P | 2017 |
| Periodontal infection as a possible severity factor for rheumatoid arthritis                                                                                                                 | Ribeiro, , J, Leão, A; Novaes, AB                                                                                                                                                                                                                                                                                                                                                                                                                                                                                        | 2005 |
| Management of peripheral arterial interventions with mono or dual antiplatelet therapy—the MIRROR study: a randomised and double-blinded clinical trial                                      | Tepe, , G, Bantleon, R, Brechtel, K, Schmehl, J, Zeller, T, Claussen, CD; Strobl, FF                                                                                                                                                                                                                                                                                                                                                                                                                                     | 2012 |
| Maintenance effect of polyglycosides of Tripterygium wilfordii on remission in postoperative Crohn disease                                                                                   | Tao, , QS, Ren, JA, Ji, ZL, Li, JS, Wang, XB; Jiang, XH                                                                                                                                                                                                                                                                                                                                                                                                                                                                  | 2009 |
| A heparin-bonded vascular graft generates no systemic effect on markers of hemostasis activation or detectable heparin-induced thrombocytopenia-associated antibodies in humans              | Heyligers, , JM, Lisman, T, Verhagen, HJ, Weeterings, C, de Groot, PG; Moll, FL                                                                                                                                                                                                                                                                                                                                                                                                                                          | 2008 |
| Effect of Gemcitabine and nab-Paclitaxel with or Without Hydroxychloroquine on Patients with Advanced Pancreatic Cancer: a Phase 2 Randomized Clinical Trial                                 | Karasic, , TB, O'Hara, MH, Loaiza-Bonilla, A, Reiss, KA, Teitelbaum, UR, Borazanci, E, De Jesus-Acosta, A, Redlinger, C, Burrell, JA, Laheru, DA, Von Hoff, DD, Amaravadi, RK, Drebin, JA; O'Dwyer, PJ                                                                                                                                                                                                                                                                                                                   | 2019 |

|                                                                                                                                                                                                                                                                                |                                                                                                                            |      |
|--------------------------------------------------------------------------------------------------------------------------------------------------------------------------------------------------------------------------------------------------------------------------------|----------------------------------------------------------------------------------------------------------------------------|------|
| Effects of anesthesia based on large versus small doses of fentanyl on natural killer cell cytotoxicity in the perioperative period                                                                                                                                            | Beilin, , B, Shavit, Y, Hart, J, Mordashov, B, Cohn, S, Notti, I; Bessler, H                                               | 1996 |
| Anesthetics to Prevent Lung Injury in Cardiac Surgery (APLICS): a protocol for a randomized controlled trial                                                                                                                                                                   | O'Gara, , B, Subramaniam, B, Shaefti, S, Mueller, A, Banner-Goodspeed, V; Talmor, D                                        | 2019 |
| Rationale and design of the Clinical and Histologic Analysis of Mesenchymal Stromal Cells in Amputations (CHAMP) trial investigating the therapeutic mechanism of mesenchymal stromal cells in the treatment of critical limb ischemia                                         | Wang, , SK, Green, LA, Drucker, NA, Motaganahalli, RL, Fajardo, A; Murphy, MP                                              | 2018 |
| A PHASE IIA OPEN LABEL, ADAPTATIVE, RANDOMIZED CLINICAL TRIAL OF DALOTUZUMAB (MK-0646) TREATMENT IN COMBINATION WITH IRINOTECAN VERSUS CETUXIMAB AND IRINOTECAN FOR PATIENTS WITH METASTATIC RECTAL CANCERS (MRC) EXPRESSING HIGH IGF-1/LOW IGF-2 LEVELS                       | PER-075-12                                                                                                                 | 2012 |
| A randomised, double-blind, placebo-controlled, parallel group study to investigate the anti-inflammatory and metabolic effects of rosiglitazone XR, 8mg once daily, in subjects with rheumatoid arthritis. - HM2004/00255/03                                                  | EUCTR2004-000482-35-LT                                                                                                     | 2005 |
| Randomised trial of basiliximab versus placebo for control of acute cellular rejection in renal allograft recipients. CHIB 201 International Study Group                                                                                                                       | Nashan, , B, Moore, R, Amlot, P, Schmidt, AG, Abeywickrama, K; Soullillou, JP                                              | 1997 |
| Neoadjuvant Therapy in Advanced Ovarian Cancer with Avastin                                                                                                                                                                                                                    | EUCTR2012-003883-31-ES                                                                                                     | 2013 |
| Periostin and periodontal disease as modifiers of atherosclerotic coronary artery disease                                                                                                                                                                                      | ISRCTN17884414                                                                                                             | 2015 |
| Shed-blood-separation and cell-saver: an integral Part of MiECC? Shed-blood-separation and its influence on the perioperative inflammatory response during coronary revascularization with minimal invasive extracorporeal circulation systems - a randomized controlled trial | Bauer, , A, Hausmann, H, Schaarschmidt, J, Scharpenberg, M, Troitzsch, D, Johansen, P, Nygaard, H, Eberle, T; Hasenkam, JM | 2018 |
| A clinical study comparing the effectiveness of two drugs, named Rituximab and Dimethyl Fumarate (Tecfidera®), for the neurological disease Multiple Sclerosis                                                                                                                 | EUCTR2015-004116-38-SE                                                                                                     | 2015 |
| Effect of periodontal surgery on reduction of serum concentration of CRP                                                                                                                                                                                                       | IRCT201101291606N2                                                                                                         | 2011 |
| PROFILE - personalised medicine in Crohn's disease                                                                                                                                                                                                                             | ISRCTN11808228                                                                                                             | 2017 |
| Does conversion to Nulojix reduce the risk of cardiovascular disease in kidney transplant recipients?                                                                                                                                                                          | EUCTR2013-001178-20-NL                                                                                                     | 2015 |
| A Study of the Efficacy and PK/PD Relationship of Monotherapy MORAB-004 in Subjects with Metastatic Melanoma                                                                                                                                                                   | EUCTR2011-001282-40-GB                                                                                                     | 2011 |
| Intra-articular and intravenous infliximab in the treatment of resistant seronegative oligoarthritis of the knee - Seronegative Oligoarthritis of the Knee Study                                                                                                               | EUCTR2009-015810-23-GB                                                                                                     | 2010 |
| GEM 3: combination methotrexate and gefitinib for the treatment of ectopic pregnancy                                                                                                                                                                                           | EUCTR2015-005013-76-GB                                                                                                     | 2016 |
| Randomised controlled trial of soluble plantain fibre for maintenance of health during periods of remission in Crohn's disease                                                                                                                                                 | ISRCTN62819212                                                                                                             | 2007 |
| A clinical study to evaluate the tolerability of repeated doses of CEP-33457 administered in patients with a chronic autoimmune disease (Lupus)                                                                                                                                | EUCTR2010-019293-32-PT                                                                                                     | 2010 |
| A clinical trial studying Paclitaxel with or without MM-121 for patients with advanced ovarian cancer                                                                                                                                                                          | EUCTR2011-003576-36-CZ                                                                                                     | 2011 |
| A study of atezolizumab compared to placebo for subjects with late relapse ovarian cancer receiving a treatment with platinum-based chemotherapy and bevacizumab                                                                                                               | EUCTR2015-005471-24-FR                                                                                                     | 2016 |
| Effects of ISIS 329993, a C Reactive Protein Antisense Oligonucleotide, in patients with sporadic Atrial Fibrillation                                                                                                                                                          | EUCTR2012-000833-38-GB                                                                                                     | 2012 |
| Safety Evaluation of the Maintenance treatment of Sorafenib in Hepatocellular carcinoma patients with Tumor thrombus after palliative surgery                                                                                                                                  | JPRN-UMIN000005910                                                                                                         | 2011 |
| An open pilot study to assess the effects of pemirolast on C-reactive protein levels in subjects with coronary artery disease                                                                                                                                                  | EUCTR2009-016823-74-SE                                                                                                     | 2009 |
| A randomised control trial of SEEG electrode placement methods                                                                                                                                                                                                                 | ISRCTN17209025                                                                                                             | 2016 |
| A phase II trial with bevacizumab and irinotecan for patients with primary brain tumors and progression after standard therapy - BI-Brain-01                                                                                                                                   | EUCTR2006-006011-74-DK                                                                                                     | 2006 |
| An Investigation of the Safety of Continued Treatment with Sorafenib in Patients with Unresectable Hepatocellular Carcinoma after the First Disease Progression                                                                                                                | JPRN-UMIN000005818                                                                                                         | 2011 |
| Randomized phase III study evaluating hyperthermic intraperitoneal chemotherapy in the treatment of ovarian cancer relapse                                                                                                                                                     | EUCTR2010-023035-42-ES                                                                                                     | 2012 |
| PHASE 3, MULTICENTER, RANDOMIZED, DOUBLE BLIND, PARALLEL GROUP, PLACEBO CONTROLLED STUDY TO EVALUATE THE EFFICACY AND SAFETY OF CERTOLIZUMAB PEGOL IN SUBJECTS WITH ADULT ONSET ACTIVE AND PROGRESSIVE PSORIATIC ARTHRITIS (PSA)                                               | EUCTR2009-011720-59-NL                                                                                                     | 2010 |
| Dose section Phase II study to compare the inhibition of blood loss in patients undergoing primary heart surgery and treatment with the                                                                                                                                        | EUCTR2011-004666-15-DE                                                                                                     | 2011 |



|                                                                                                                                                                                                                                                                                                                                                     |                                                                                                                                                                                                                                       |      |
|-----------------------------------------------------------------------------------------------------------------------------------------------------------------------------------------------------------------------------------------------------------------------------------------------------------------------------------------------------|---------------------------------------------------------------------------------------------------------------------------------------------------------------------------------------------------------------------------------------|------|
| investigational drug MDCO-2010, the active comparator tanexamic acid or placebo                                                                                                                                                                                                                                                                     |                                                                                                                                                                                                                                       |      |
| Indicators of Gum Diseases                                                                                                                                                                                                                                                                                                                          | CTRI/2018/11/016360                                                                                                                                                                                                                   | 2018 |
| Clinical trial to evaluate the efficacy and safety of K(D)PT in patients with mild to moderate ulcerative colitis                                                                                                                                                                                                                                   | EUCTR2011-002462-20-SK                                                                                                                                                                                                                | 2011 |
| Response to neoadjuvant chemotherapy in ICON8: a GCIG phase III randomised trial evaluating weekly dose-dense chemotherapy integration in first-line epithelial ovarian/ fallopian tube/ primary peritoneal carcinoma (EOC) treatment                                                                                                               | Clamp, , AR, McNeish, IA, Dean, A, Gallardo-Rincon, D, Kim, J-W, O'Donnell, DM, Hook, J, Blagden, S, Brenton, JD, Naik, R, Perren, TJ, Sundar, S, Cook, AD, James, EC, Gabra, H, Lord, R, Hall, M, Dark, G, Kaplan, RS; Ledermann, JA | 2018 |
| Subgroups analysis and circulating biomarkers evaluation of RESORT trial: a randomized phase II study in metastatic renal cell carcinoma (mRCC) patients (pts) to evaluate the efficacy of sorafenib after metastasectomy                                                                                                                           | Procopio, , G, Cognetti, F, Miceli, R, Milella, M, Mosca, A, Chiuri, VE, Bearz, A, Morelli, F, Ortega, C, Atzori, F, Passalacqua, R, Ratta, R, De Braud, FGM, Cappelletti, V; Verzoni, E                                              | 2018 |
| COMBINATION ANTI-PARATUBERCULOSIS THERAPY WITH RIFABUTIN, CLARITHROMYCIN AND CLOFAZIMINE FOR CROHN'S DISEASE: a THREE YEAR PROSPECTIVE, RANDOMISED, PLACEBO-CONTROLLED, MULTICENTRE STUDY                                                                                                                                                           | ACTRN12605000429651                                                                                                                                                                                                                   | 2005 |
| The effect of melatonin supplementation in the treatment of type 2 diabetic patients with chronic periodontitis disorder                                                                                                                                                                                                                            | IRCT2017011631993N1                                                                                                                                                                                                                   | 2017 |
| Comparison of the effects of oral hygiene instruction and periodontal treatment on patients with Type 2 diabetes mellitus                                                                                                                                                                                                                           | JPRN-UMIN000013278                                                                                                                                                                                                                    | 2014 |
| Clinical trial to shortening the treatment for pulmonary tuberculosis with rifapentin containing regimen                                                                                                                                                                                                                                            | EUCTR2015-003446-45-ES                                                                                                                                                                                                                | 2015 |
| RANDOMIZED, OPEN LABEL, PHASE 3 CLINICAL STUDY TO EVALUATE THE EFFECT OF THE ADDITION OF CP-751,871 TO GEMCITABINE AND CISPLATIN IN PATIENTS WITH ADVANCED NON-SMALL CELL LUNG CANCER                                                                                                                                                               | EUCTR2008-004008-30-BE                                                                                                                                                                                                                | 2009 |
| A study to investigate the safety and effectiveness of treatment with the drug Elafibranor in Patients with Non-Alcoholic Steatohepatitis (NASH) and fibrosis (a form of liver disease)                                                                                                                                                             | EUCTR2015-005385-38-BE                                                                                                                                                                                                                | 2016 |
| Sodium valproate for epigenetic reprogramming in the management of high risk oral epithelial dysplasia                                                                                                                                                                                                                                              | ISRCTN12448611                                                                                                                                                                                                                        | 2018 |
| Conventional open versus laparoscopic surgery for peritoneal dialysis (PD) peritonitis                                                                                                                                                                                                                                                              | ISRCTN55802603                                                                                                                                                                                                                        | 2009 |
| Relook Laparoscopy for Peritoneal Surface Disease (ReLaPSeD) Trial A prospective randomised controlled trial comparing relook laparoscopy vs. standard follow-up for early detection and treatment of patients at high risk for peritoneal metastases after resection of colorectal cancer                                                          | ACTRN12618000372280                                                                                                                                                                                                                   | 2018 |
| Interactions between diet and gut microbes in preterm infants                                                                                                                                                                                                                                                                                       | ISRCTN16799022                                                                                                                                                                                                                        | 2017 |
| A clinical study comparing Acelarin with gemcitabine in patient with metastatic pancreatic carcinoma                                                                                                                                                                                                                                                | ISRCTN16765355                                                                                                                                                                                                                        | 2015 |
| A 24-WEEK, DOUBLE-BLIND, RANDOMIZED, PARALLEL GROUP, PLACEBO-CONTROLLED, PHASE 2 STUDY OF DIFFERENT DOSES OF VX509 IN ADULT SUBJECTS WITH ACTIVE RHEUMATOID ARTHRITIS ON STABLE METHOTREXATE THERAPY WITH 104-WEEK OPEN LABEL EXTENSION                                                                                                             | PER-076-12                                                                                                                                                                                                                            | 2012 |
| A phase 2 Study of the efficacy and safety of erlotinib therapy for 3/4 stage EGFR gene mutation positive EGFR-TKI untreated non-small cell lung cancer                                                                                                                                                                                             | JPRN-UMIN000011986                                                                                                                                                                                                                    | 2013 |
| Health of gums effecting health of heart in heart disease                                                                                                                                                                                                                                                                                           | CTRI/2018/02/011970                                                                                                                                                                                                                   | 2018 |
| PGL5001 Proof of Concept study in inflammatory endometriosis                                                                                                                                                                                                                                                                                        | EUCTR2012-001219-22-PL                                                                                                                                                                                                                | 2012 |
| Ward based goal-directed fluid therapy (GDFT) in acute pancreatitis                                                                                                                                                                                                                                                                                 | ISRCTN36077283                                                                                                                                                                                                                        | 2018 |
| Phase II clinical trial, conducted in different sites, with random assignation of treatment, where neither the patient or the medical doctor know the assigned treatment, drug or placebo, to evaluate the efficacy and safety of Rifaximin delayed release 400 mg tablet in the prevention of post-operative endoscopic Crohn's disease recurrence | EUCTR2017-002258-36-DE                                                                                                                                                                                                                | 2017 |
| High dose vitamin D treatment in Crohn's disease affects the gut immune cells                                                                                                                                                                                                                                                                       | EUCTR2013-000971-34-DK                                                                                                                                                                                                                | 2013 |
| A study to evaluate the efficacy and safety of a new anticoagulation drug REG1 compared with bivalirudin in patients undergoing angioplasty                                                                                                                                                                                                         | EUCTR2013-001384-23-AT                                                                                                                                                                                                                | 2013 |
| Treatment of focal nerve pain with lidocaine patch                                                                                                                                                                                                                                                                                                  | EUCTR2012-003077-26-DK                                                                                                                                                                                                                | 2012 |
| ROLO The Renoprotective value of Leukodepletion in Heart Valve surgery                                                                                                                                                                                                                                                                              | ISRCTN42121335                                                                                                                                                                                                                        | 2014 |
| The antioxidant effects of Q10 co enzyme on oxidative stress and lipid per oxidation among gastric patients infected by h.pylori                                                                                                                                                                                                                    | IRCT2014070118310N1                                                                                                                                                                                                                   | 2014 |
| A double-blind, randomized, vehicle-controlled Proof of Concept (PoC) study to evaluate the efficacy, safety, local tolerability, pharmacokinetics and pharmacodynamics of multiple topical administrations of LDE225 (a specific Smoothened inhibitor) on sporadic superficial skin basal cell carcinomas                                          | EUCTR2009-013665-26-AT                                                                                                                                                                                                                | 2009 |

|                                                                                                                                                                                                                                                                                                                                                                          |                                                                                                                                                                                                                         |      |
|--------------------------------------------------------------------------------------------------------------------------------------------------------------------------------------------------------------------------------------------------------------------------------------------------------------------------------------------------------------------------|-------------------------------------------------------------------------------------------------------------------------------------------------------------------------------------------------------------------------|------|
| A 4 week double-blind, placebo-controlled, randomized, parallel group phase IIa study to assess the efficacy and safety of AZD1981 in patients with moderate to severe Chronic Obstructive Pulmonary Disease (COPD)                                                                                                                                                      | EUCTR2008-000340-13-SE                                                                                                                                                                                                  | 2008 |
| Imatinib therapy for aggressive colon cancers                                                                                                                                                                                                                                                                                                                            | EUCTR2014-003965-11-NL                                                                                                                                                                                                  | 2015 |
| A window of opportunity study investigating biological effects of metformin in localised prostate cancer                                                                                                                                                                                                                                                                 | EUCTR2014-005193-11-GB                                                                                                                                                                                                  | 2015 |
| A Randomized, Double-Blind, Multicenter, Phase 2 Trial Comparing Veliparib Plus Carboplatin and Paclitaxel Versus Placebo Plus Carboplatin and Paclitaxel in Previously Untreated Metastatic or Advanced Non-Small-Cell Lung Cancer (NSCLC)                                                                                                                              | EUCTR2011-003427-36-HU                                                                                                                                                                                                  | 2012 |
| EFFECTS OF NEBIVOLOL ON THE WALKING ABILITY IN PATIENTS WITH ESSENTIAL HYPERTENSION AND PERIPHERAL ARTERIAL DISEASE INTERMITTENT CLAUDICATION                                                                                                                                                                                                                            | EUCTR2004-004863-32-DE                                                                                                                                                                                                  | 2005 |
| MULTICENTRIC, RANDOMISED, DOUBLE BLIND, PLACEBO CONTROLLED CLINICAL TRIAL TO EVALUATE THE EFFICACY AND THE SAFETY OF THE PROPHYLAXIS WITH BEMIPARIN 3,500 IU/day FOR 28 DAYS COMPARED TO 8 DAYS, IN VENOUS THROMBOEMBOLIC DISEASE IN PATIENTS UNDERGOING ONCOLOGICAL ABDOMINAL OR PELVIC SURGERY [CANBESURE STUDY: cancer, Bemiparin and Surgery Evaluation] - CANBESURE | EUCTR2005-004373-23-PT                                                                                                                                                                                                  | 2007 |
| EXPERIMENTAL STUDY IN HUMANS TO EVALUATE THE EFFICACY OF A PRE-SURGERY CHEMOTHERAPY SCHEME CUSTOMIZED BY LEVELS OF TUMORAL BIOMARKERS IN CERTAIN TYPES OF EARLY BREAST CANCER                                                                                                                                                                                            | EUCTR2011-005843-28-ES                                                                                                                                                                                                  | 2013 |
| The effect study of treatment of triple negative breast cancer by integrated traditional and western medicine                                                                                                                                                                                                                                                            | ChiCTR-IPR-16008590                                                                                                                                                                                                     | 2016 |
| A clinical trial to evaluate the influence of electrical stimulation on sensory and motoric deficits in patients with lumbar disc herniation                                                                                                                                                                                                                             | ISRCTN12741173                                                                                                                                                                                                          | 2017 |
| A randomized controlled trial on the efficacy and safety of autologous cytokine-induced killer (CIK) cells infusion treatment in advanced primary lung cancer                                                                                                                                                                                                            | ChiCTR-TRC-11001558                                                                                                                                                                                                     | 2011 |
| Effect of periodontal non-surgical treatment for pre-diabetes/type 2 diabetes patients                                                                                                                                                                                                                                                                                   | ISRCTN25474337                                                                                                                                                                                                          | 2015 |
| PROVENT: a randomised, placebo controlled feasibility study to examine the effectiveness of aspirin and/or Vitamin D to prevent disease progression in men undergoing monitoring for prostate cancer                                                                                                                                                                     | EUCTR2014-001784-13-GB                                                                                                                                                                                                  | 2015 |
| Continued effectiveness of a biosimilar adalimumab after stoppage of initial treatment in patients with ankylosing spondylitis                                                                                                                                                                                                                                           | Bandyopadhyay, , S, Ray, A, Sarkar, RN, Dash, S; Mondal, S                                                                                                                                                              | 2017 |
| Effects of off-pump versus on-pump coronary artery bypass grafting: apoptosis, inflammation, and oxidative stress                                                                                                                                                                                                                                                        | Bicer, , M, Senturk, T, Yanar, M, Tutuncu, A, Oral, AY, Ulukaya, E, Serdar, Z; Signak, IS                                                                                                                               | 2014 |
| Improved memory function 12 weeks after bariatric surgery                                                                                                                                                                                                                                                                                                                | Gunstad, , J, Strain, G, Devlin, MJ, Wing, R, Cohen, RA, Paul, RH, Crosby, RD; Mitchell, JE                                                                                                                             | 2011 |
| The efficacy of cardiac shock wave therapy in the treatment of refractory angina: a pilot prospective, randomized, double-blind trial                                                                                                                                                                                                                                    | Leibowitz, , D, Weiss, AT, Rott, D, Durst, R; Lotan, C                                                                                                                                                                  | 2013 |
| Prognostic significance of T-cell phenotype in aggressive non-Hodgkin's lymphomas                                                                                                                                                                                                                                                                                        | Gisselbrecht, , C, Gaulard, P, Lepage, E, Coiffier, B, Briere, J, Haioun, C, Cazals-Hatem, D, Bosly, A, Xerri, L, Tilly, H, Berger, F, Bouhaddallah, R; Diebold, J                                                      | 1998 |
| Randomized, controlled trial of TNF-alpha antagonist in CTL-mediated severe cutaneous adverse reactions                                                                                                                                                                                                                                                                  | Wang, , C-W, Yang, L-Y, Chen, C-B, Ho, H-C, Hung, S-I, Yang, C-H, Chang, C-J, Su, S-C, Hui, RC-Y, Chin, S-W, Huang, L-F, Lin, YY-W, Chang, W-Y, Fan, W-L, Yang, C-Y, Ho, J-C, Chang, Y-C, Lu, C-W, Chung, W-H; Lai, C-H | 2018 |
| On-line hemodiafiltration does not induce inflammatory response in end-stage renal disease patients: results from a multicenter cross-over study                                                                                                                                                                                                                         | Vaslaki, , LR, Berta, K, Major, L, Weber, V, Weber, C, Wojke, R, Passlick-Deetjen, J; Falkenhagen, D                                                                                                                    | 2005 |
| Long-term moderate calorie restriction inhibits inflammation without impairing cell-mediated immunity: a randomized controlled trial in non-obese humans                                                                                                                                                                                                                 | Meydani, , SN, Das, SK, Pieper, CF, Lewis, MR, Klein, S, Dixit, VD, Gupta, AK, Villareal, DT, Bhapkar, M, Huang, M, Fuss, PJ, Roberts, SB, Holloszy, JO; Fontana, L                                                     | 2016 |
| Preconditioning by sevoflurane decreases biochemical markers for myocardial and renal dysfunction in coronary artery bypass graft surgery: a double-blinded, placebo-controlled, multicenter study                                                                                                                                                                       | Julier, , K, Da Silva, R, Garcia, C, Bestmann, L, Frascarolo, P, Zollinger, A, Chassot, P-G, Schmid, ER, Turina, MI, Von Segesser, LK, Pasch, T, Spahn, DR; Zaugg, M                                                    | 2003 |
| Cytokine profiles in 1-yr-old very low-birth-weight infants after enteral glutamine supplementation in the neonatal period                                                                                                                                                                                                                                               | van Zwol, , A, van den Berg, A, Nieuwenhuis, EE, Twisk, JW, Fetter, WP; van Elburg, RM                                                                                                                                  | 2009 |
| Immunological consequences of thalidomide treatment in Sjögren's syndrome                                                                                                                                                                                                                                                                                                | Moutsopoulos, , NM, Angelov, N, Sankar, V, Leakan, RA, Pillemer, S; Wahl, SM                                                                                                                                            | 2006 |
| Rational control on postoperative blood glucose levels in infants with congenital heart disease                                                                                                                                                                                                                                                                          | Liu, , M, Zheng, P, Zheng, XY; Meng, XK                                                                                                                                                                                 | 2012 |
| Efficacy and safety of sirukumab in patients with active rheumatoid arthritis refractory to anti-TNF therapy (SIRROUND-T): a randomised, double-blind, placebo-controlled, parallel-group, multinational, phase 3 study                                                                                                                                                  | Aletaha, , D, Bingham, CO, Tanaka, Y, Agarwal, P, Kurrasch, R, Tak, PP; Popik, S                                                                                                                                        | 2017 |
| Effects of the Chinese herb formula Yufening on stable chronic obstructive pulmonary disease: a randomized, double-blind, placebo-controlled trial                                                                                                                                                                                                                       | Hong, , M, Hong, C, Chen, H, Ke, G, Huang, J, Huang, X, Liu, Y, Li, F; Li, C                                                                                                                                            | 2018 |

|                                                                                                                                                                                                                                                |                                                                                                                                                                                                                          |      |
|------------------------------------------------------------------------------------------------------------------------------------------------------------------------------------------------------------------------------------------------|--------------------------------------------------------------------------------------------------------------------------------------------------------------------------------------------------------------------------|------|
| The effect of probiotics on serum levels of cytokine and endotoxin in peritoneal dialysis patients: a randomised, double-blind, placebo-controlled trial                                                                                       | Wang, , IK, Wu, YY, Yang, YF, Ting, IW, Lin, CC, Yen, TH, Chen, JH, Wang, CH, Huang, CC; Lin, HC                                                                                                                         | 2015 |
| Translational research in the Gynecologic Oncology Group: evaluation of ovarian cancer markers, profiles, and novel therapies                                                                                                                  | Darcy, , KM; Birrer, MJ                                                                                                                                                                                                  | 2010 |
| TNF-alpha Directed Therapy in Asthma                                                                                                                                                                                                           | NCT00278083                                                                                                                                                                                                              | 2006 |
| Leukocyte filtration ameliorates the inflammatory response in patients with mild to moderate lung dysfunction                                                                                                                                  | Onorati, , F, Santini, F, Mariscalco, G, Bertolini, P, Sala, A, Faggian, G; Mazzucco, A                                                                                                                                  | 2011 |
| Estimate of CRP and TNF-alpha level before and after periodontal therapy in cardiovascular disease patients                                                                                                                                    | Koppolu, , P, Durvasula, S, Palaparthi, R, Rao, M, Sagar, V, Reddy, SK; Lingam, S                                                                                                                                        | 2013 |
| Dynamic changes in cytokine levels in serum and synovial fluid following filtration leukocytapheresis therapy in patients with rheumatoid arthritis                                                                                            | Hidaka, , T, Suzuki, K, Kawakami, M, Okada, M, Kataharada, K, Shinohara, T, Takamizawa-Matsumoto, M; Ohsuzu, F                                                                                                           | 2001 |
| Complete Endoscopic Thyroidectomy via Oral Vestibular Approach Versus Areola Approach for Treatment of Thyroid Diseases                                                                                                                        | Yang, , J, Wang, C, Li, J, Yang, W, Cao, G, Wong, HM, Zhai, H; Liu, W                                                                                                                                                    | 2015 |
| Effect of low-dose oral prednisolone on symptoms and systemic inflammation in older adults with moderate to severe knee osteoarthritis: a randomized placebo-controlled trial                                                                  | Abou-Raya, , A, Abou-Raya, S, Khadrawi, T; Helmii, M                                                                                                                                                                     | 2014 |
| Combination of hemofiltration and peritoneal dialysis in the treatment of severe acute pancreatitis                                                                                                                                            | Yang, , C, Guanghua, F, Wei, Z, Zhong, J, Penghui, J, Xin, F; Xiping, Z                                                                                                                                                  | 2010 |
| Effects of combined administration of low dose atorvastatin and vitamin E on inflammatory markers and endothelial function in patients with heart failure                                                                                      | Tousoulis, , D, Antoniadis, C, Vassiliadou, C, Toutouza, M, Pitsavos, C, Tentolouris, C, Trikas, A; Stefanadis, C                                                                                                        | 2005 |
| Can neutrophil to lymphocyte ratio (NLR) or eosinophil to lymphocyte ratio (ELR) be used to predict the outcome of omalizumab treatment in eosinophilic and non-eosinophilic severe allergic asthma?                                           | Ozgen, , H, Bulut, I, Tepetam, FM; Orcen, C                                                                                                                                                                              | 2018 |
| Acupuncture Combined with Hydrotherapy in Diabetes Patients with Mild Lower-Extremity Arterial Disease: a Prospective, Randomized, Nonblinded Clinical Study                                                                                   | Qi, , Z, Pang, Y, Lin, L, Zhang, B, Shao, J, Liu, X; Zhang, X                                                                                                                                                            | 2018 |
| Efficacy of short-term adjunctive subantimicrobial dose doxycycline in diabetic patients-randomized study                                                                                                                                      | Gilowski, , L, Kondzielnik, P, Wiench, R, Plocica, I, Strojek, K; Krzemiński, TF                                                                                                                                         | 2012 |
| Does the Oral Contraceptive Pill Increase Plasma Intercellular Adhesion Molecule-1, Monocyte Chemoattractant Protein-1, and Tumor Necrosis Factor-alpha Levels in Women with Polycystic Ovary Syndrome: a Pilot Study                          | Yousuf, , SD, Rashid, F, Mattoo, T, Shekhar, C, Mudassar, S, Zargar, MA; Ganie, MA                                                                                                                                       | 2016 |
| Short-term efficacy and safety of sitagliptin treatment in long-term stable renal recipients with new-onset diabetes after transplantation                                                                                                     | Strøm Halden, , TA, Åsberg, A, Vik, K, Hartmann, A; Jenssen, T                                                                                                                                                           | 2014 |
| Longterm safety and efficacy of abatacept through 5 years of treatment in patients with rheumatoid arthritis and an inadequate response to tumor necrosis factor inhibitor therapy                                                             | Genovese, , MC, Schiff, M, Luggen, M, Le Bars, M, Aranda, R, Elegbe, A; Dougados, M                                                                                                                                      | 2012 |
| Gene polymorphisms and serological markers of patients with active Crohn's disease in a clinical trial of antisense to ICAM-1                                                                                                                  | Yacyshyn, , BR, Schievella, A, Sewell, KL; Tami, JA                                                                                                                                                                      | 2005 |
| Rationale and design of SuPPoRT: a multi-centre randomised controlled trial to compare three treatments: cervical cerclage, cervical pessary and vaginal progesterone, for the prevention of preterm birth in women who develop a short cervix | Hezelgrave, , NL, Watson, HA, Ridout, A, Diab, F, Seed, PT, Chin-Smith, E, Tribe, RM; Shennan, AH                                                                                                                        | 2016 |
| Effects of adalimumab therapy in adult subjects with moderate-to-severe psoriasis on Th17 pathway                                                                                                                                              | Balato, , A, Schiattarella, M, Di Caprio, R, Lembo, S, Mattii, M, Balato, N; Ayala, F                                                                                                                                    | 2014 |
| Therapeutic effectiveness of intravenous immunoglobulin at 1 g/kg and 2 g/kg on Kawasaki disease: a comparative and follow-up study                                                                                                            | Qin, , LJ, Wang, HW, Hu, XF, Liu, QJ, Shi, H, Wei, YX, Chen, QJ; Cheng, PX                                                                                                                                               | 2006 |
| Adherence to the Mediterranean diet attenuates inflammation and coagulation process in healthy adults: the ATTICA Study                                                                                                                        | Chrysohou, , C, Panagiotakos, DB, Pitsavos, C, Das, UN; Stefanadis, C                                                                                                                                                    | 2004 |
| Safety and Efficacy of Open-label Subcutaneous Ixekizumab Treatment for 48 Weeks in a Phase II Study in Biologic-naïve and TNF-IR Patients with Rheumatoid Arthritis                                                                           | Genovese, , MC, Braun, DK, Erickson, JS, Berclaz, PY, Banerjee, S, Heffernan, MP; Carlier, H                                                                                                                             | 2016 |
| Effects of mud-bath therapy in psoriatic arthritis patients treated with TNF inhibitors. Clinical evaluation and assessment of synovial inflammation by contrast-enhanced ultrasound (CEUS)                                                    | Cozzi, , F, Raffener, B, Beltrame, V, Ciprian, L, Coran, A, Botsios, C, Perissinotto, E, Grisan, E, Ramonda, R, Oliviero, F, Stramare, R; Punzi, L                                                                       | 2015 |
| Epigenetic alterations at diagnosis predict susceptibility, prognosis and treatment escalation in inflammatory bowel disease-IBD character                                                                                                     | Kalla, , R, Adams, AT, Vatn, S, Bonfiglio, F, Nimmo, ER, Kennedy, NA, Ventham, N, Vatn, MH, Ricanek, P, Bergemalm, D, Halfvarson, J, Soderholm, JD, Pierik, M, Torkvist, L, Gomollon, F, Gut, I, Jahnson, J; Satsangi, J | 2017 |
| Arterialization of peripheral venous blood in sickle cell disease                                                                                                                                                                              | Nahavandi, , M, Millis, RM, Tavakkoli, F, Wyche, MQ, Perlin, E, Winter, WP; Castro, O                                                                                                                                    | 2002 |
| Impact of mechanical and biological aortic valve replacement on coronary perfusion: a prospective, randomized study                                                                                                                            | Bakhtiary, , F, Abolmaali, N, Dzembali, O, Wittlinger, T, Doss, M, Moritz, A; Kleine, P                                                                                                                                  | 2006 |
| Matrix Metalloproteinases in Patients With Critical Limb Ischemia Undergoing Surgical Revascularization                                                                                                                                        | NCT02388867                                                                                                                                                                                                              | 2015 |
| Individualized cryoballoon energy pulmonary vein isolation guided by real-time pulmonary vein recordings, the randomized ICE-T trial                                                                                                           | Chun, , KR, Stich, M, Fürnkranz, A, Bordignon, S, Perrotta, L, Dugo, D, Bologna, F; Schmidt, B                                                                                                                           | 2017 |
| ACE inhibition with perindopril and biomarkers of atherosclerosis and thrombosis: results from the PERTINENT study                                                                                                                             | Ceconi, , C, Fox, KM, Remme, WJ, Simoons, ML, Deckers, JW, Bertrand, M, Parrinello, G, Klufft, C, Blann, A, Cokkinos, D; Ferrari, R                                                                                      | 2009 |
| Change of peripheral levels of pituitary hormones and cytokines after injection of interferon (IFN)-beta in patients with chronic hepatitis C                                                                                                  | Ohno, , Y, Fujimoto, M, Nishimura, A; Aoki, N                                                                                                                                                                            | 1998 |
| Early detection of melanoma progression by quantitative real-time RT-PCR analysis for multiple melanoma markers                                                                                                                                | Arenberger, , P, Arenbergerova, M, Vohradnikova, O; Kremen, J                                                                                                                                                            | 2008 |

|                                                                                                                                                                                                                                                  |                                                                                                                                                                                                                                                                                                                |      |
|--------------------------------------------------------------------------------------------------------------------------------------------------------------------------------------------------------------------------------------------------|----------------------------------------------------------------------------------------------------------------------------------------------------------------------------------------------------------------------------------------------------------------------------------------------------------------|------|
| Reduced intensity allogeneic stem cell transplantation for younger patients with myelofibrosis                                                                                                                                                   | Mannina, , D, Wolschke, C, Zabelina, T, Zeck, G, Von Pein, U-M, Ayuk, FA; Kroeger, N                                                                                                                                                                                                                           | 2018 |
| EULAR recommendations for the use of imaging in spondyloarthritis in clinical practice                                                                                                                                                           | Mandl, , P, Navarro-Compán, V, Bakker, P, Terslev, L, Aegerter, P, Van Der Heijde, D, D'Agostino, M-A, Baraliakos, X, Pedersen, SJ, Jurik, AG, Naredo, E, Schueller-Weidekamm, C, Weber, U, Wick, M, Filippucci, E, Conaghan, PG, Rudwaleit, M, Schett, GA, Sieper, J, Tarp, S, Marzo-Ortega, H; Ostergaard, M | 2014 |
| Improvement in immune parameters and human immunodeficiency virus-1 viral response in individuals treated with 16alpha-bromoepiandrosterone (HE2000)                                                                                             | Reading, , C, Dowding, C, Schramm, B, Garsd, A, Onizuka-Handa, N, Stickney, D; Frincke, J                                                                                                                                                                                                                      | 2006 |
| Effects of dietary supplementation with a standardized aqueous extract of Terminalia chebula fruit (AyuFlex®) on joint mobility, comfort, and functional capacity in healthy overweight subjects: a randomized placebo-controlled clinical trial | Lopez, , HL, Habowski, SM, Sandrock, JE, Raub, B, Kedia, A, Bruno, EJ; Ziegenfuss, TN                                                                                                                                                                                                                          | 2017 |
| Effects of Angiotensin-converting enzyme inhibition and statin treatment on inflammatory markers and endothelial functions in patients with longterm rheumatoid arthritis                                                                        | Tikiz, , C, Utuk, O, Pirildar, T, Bayturan, O, Bayindir, P, Taneli, F, Tikiz, H; Tuzun, C                                                                                                                                                                                                                      | 2005 |
| Preoperative evaluation of chronic alcoholics assessed for surgery of the upper digestive tract                                                                                                                                                  | Martin, , MJ, Heymann, C, Neumann, T, Schmidt, L, Soost, F, Mazurek, B, Böhm, B, Marks, C, Helling, K, Lenzenhuber, E, Müller, C, Kox, WJ; Spies, CD                                                                                                                                                           | 2002 |
| Effect of Locally-Applied Simvastatin on Clinical Attachment Level and Alveolar Bone in Periodontal Maintenance Patients                                                                                                                         | NCT03452891                                                                                                                                                                                                                                                                                                    | 2018 |
| A novel in vivo bioassay of topical drug potency and stability: an effective correlate to clinical SCORAD in atopic dermatitis                                                                                                                   | Alex, , P, Williams, S, Sutton, L, Sutton, C, Payne, A; Centola, M                                                                                                                                                                                                                                             | 2016 |
| Diminished in vitro production of interleukin-1 and tumor necrosis factor-alpha during acute visceral leishmaniasis and recovery after therapy                                                                                                   | Ho, , JL, Badaró, R, Schwartz, A, Dinarello, CA, Gelfand, JA, Sobel, J, Barral, A, Netto, MB, Carvalho, EM; Reed, SG                                                                                                                                                                                           | 1992 |
| A phase II randomized clinical trial of high-dose versus standard-dose vitamin d3 in an ethnically diverse sample of older adults                                                                                                                | Olichney, , J, DeCarli, C, Miller, JW, Johnson, D, Tomaszewski-Farias, S, Hammock, B, Dugger, B, Jin, L-W, McPhail-Ciufo, M, Soohoo, R, Mungas, D; Harvey, D                                                                                                                                                   | 2018 |
| Efficacy of Different Perioperative Statin Regimens on Protection Against Post-Coronary Artery Bypass Grafting Major Adverse Cardiac and Cerebral Events                                                                                         | Elmarsafawi, , AG, Abbassi, MM, Elkaffas, S, Elsayy, HM; Sabry, NA                                                                                                                                                                                                                                             | 2016 |
| The effect of anticoagulant therapy on coagulation and inflammation markers in sepsis patients and its significance                                                                                                                              | Han, , Y, Gao, C, Qin, B, Xu, H, Song, X, Li, B, Peng, B, Fan, T; Cheng, Z                                                                                                                                                                                                                                     | 2015 |
| Anti-inflammatory Effects of GTS-21 After LPS                                                                                                                                                                                                    | NCT00783068                                                                                                                                                                                                                                                                                                    | 2008 |
| Pentraxin 3 is uninfluenced by high doses of concentrated omega-3 fatty acids administered for 12 months following an acute myocardial infarction                                                                                                | Poenitz, , V, Grundt, H, Bottazzi, B, Cuccovillo, I, Mantovani, A; Nilsen, DW                                                                                                                                                                                                                                  | 2012 |
| The influence of selective pulmonary perfusion on the inflammatory response and clinical outcome of patients with chronic obstructive pulmonary disease undergoing cardiopulmonary bypass                                                        | Kiessling, , AH, Guo, FW, Gökdemir, Y, Thudt, M, Reyher, C, Scherer, M, Beiras-Fernandez, A; Moritz, A                                                                                                                                                                                                         | 2014 |
| Effects of LLLT on the periarthritis of the shoulder: a clinical study on different treatments with low level laser therapy, corticosteroid injections or a wait-and-see policy                                                                  | Tam, G                                                                                                                                                                                                                                                                                                         | 2012 |
| Effects of pulsatile and nonpulsatile perfusion on vital organ recovery in pediatric heart surgery: a pilot clinical study                                                                                                                       | Alkan, , T, Akçevin, A, Undar, A, Türkoğlu, H, Paker, T; Aytaç, A                                                                                                                                                                                                                                              | 2006 |
| Minimally invasive cardiac surgery—the efficacy of right parasterna approach                                                                                                                                                                     | Sawa, , Y; Matsuda, H                                                                                                                                                                                                                                                                                          | 1998 |
| Clinical efficacy, safety and anti-inflammatory activity of two sevelamer tablet forms in patients on low-flux hemodialysis                                                                                                                      | Tzanno-Martins, , C, Biavo, BM, Ferreira-Filho, O, Ribeiro-Junior, E, João-Luiz, MV, Degaspari, S, Scavone, C; Kawamoto, E                                                                                                                                                                                     | 2014 |
| Meta-analysis: factors predicting post-operative recurrence with placebo therapy in patients with Crohn's disease                                                                                                                                | Pascua, , M, Su, C, Lewis, JD, Brensinger, C; Lichtenstein, GR                                                                                                                                                                                                                                                 | 2008 |
| Identification of breast cancers with an indolent disease course: 70 gene indolent threshold validation in a Swedish randomized trial of tamoxifen vs. not, with 20 year outcomes                                                                | Esserman, , LJ, Yau, C, Thompson, CK, Van't Veer, LJ, Borowsky, AD, Hoadley, KA, Tobin, NP, Nordenskjöld, B, Fornander, T, Stal, O, Benz, CC; Lindstrom, LS                                                                                                                                                    | 2017 |
| Denosumab for treating periprosthetic osteolysis; Study protocol for a randomized, double-blind, placebo-controlled trial                                                                                                                        | Moldenberger, , O, Rysinska, A, Eisler, T, Salemyr, M, Boden, H; Muren, O                                                                                                                                                                                                                                      | 2016 |
| Low-dose theophylline does not exert its anti-inflammatory effects in mild asthma through upregulation of interleukin-10 in alveolar macrophages                                                                                                 | Oliver, , B, Tomita, K, Keller, A, Caramori, G, Adcock, I, Chung, KF, Barnes, PJ; Lim, S                                                                                                                                                                                                                       | 2001 |
| Effects of Nd: YAG and CO2 laser treatment and ultrasonic scaling on periodontal pockets of chronic periodontitis patients                                                                                                                       | Miyazaki, , A, Yamaguchi, T, Nishikata, J, Okuda, K, Suda, S, Orima, K, Kobayashi, T, Yamazaki, K, Yoshikawa, E; Yoshie, H                                                                                                                                                                                     | 2003 |
| Bosentan Improves Clinical Outcome of Adults With Congenital Heart Disease or Mitral Valve Lesions Who Undergo CARDiac Surgery                                                                                                                   | NCT01184404                                                                                                                                                                                                                                                                                                    | 2010 |
| Evaluation of perfusion modes on vital organ recovery and thyroid hormone homeostasis in pediatric patients undergoing cardiopulmonary bypass                                                                                                    | Akçevin, , A, Alkan-Bozkaya, T, Qiu, F; Undar, A                                                                                                                                                                                                                                                               | 2010 |
| Interleukin-6 enhancement after direct autologous retransfusion of shed thoracic blood does not influence haemodynamic stability following coronary artery bypass grafting                                                                       | Schroeder, , S, von Spiegel, T, Stuber, F, Hoeft, A, Preusse, CJ, Welz, A, Kampe, S; Lier, H                                                                                                                                                                                                                   | 2007 |
| Dietary supplementation with low-dose omega-3 fatty acids reduces salivary tumor necrosis factor-α levels in patients with chronic periodontitis: a randomized controlled clinical study                                                         | Keskiner, , I, Saygun, I, Bal, V, Serdar, M; Kantarci, A                                                                                                                                                                                                                                                       | 2017 |
| Curcumin reduces muscle damage and soreness following muscle-damaging exercise                                                                                                                                                                   | Jager, , R, Caldwell, AR, Sanders, E, Mitchell, JB, Rogers, J, Purpura, M; Oliver, JM                                                                                                                                                                                                                          | 2017 |

|                                                                                                                                                                                                                                                                                                              |                                                                                                                                                                                                                            |      |
|--------------------------------------------------------------------------------------------------------------------------------------------------------------------------------------------------------------------------------------------------------------------------------------------------------------|----------------------------------------------------------------------------------------------------------------------------------------------------------------------------------------------------------------------------|------|
| Preoperative oral pentoxifylline in case of coronary artery bypass grafting with left ventricular dysfunction (Ejection fraction equal to/less than 30%)                                                                                                                                                     | Mansourian, S, Bina, P, Fehri, A, Karimi, AA, Boroumand, MA; Abbasi, K                                                                                                                                                     | 2015 |
| Ingested type I interferon: state of the art as treatment for autoimmunity                                                                                                                                                                                                                                   | Brod, SA                                                                                                                                                                                                                   | 2002 |
| Macrophage activity assessed by soluble CD163 in early rheumatoid arthritis: association with disease activity but different response patterns to synthetic and biologic DMARDs                                                                                                                              | Greisen, SR, Møller, HJ, Stengaard-Pedersen, K, Hetland, ML, Hørslev-Petersen, K, Junker, P, Østergaard, M, Hvid, M; Deleuran, B                                                                                           | 2015 |
| Resveratrol improves treatment outcome and laboratory parameters in patients with Takayasu arteritis: a randomized double-blind and placebo-controlled trial                                                                                                                                                 | Shi, G, Hua, M, Xu, Q; Ren, T                                                                                                                                                                                              | 2017 |
| Successful short term treatment of severe undifferentiated spondyloarthropathy with the anti-tumor necrosis factor-alpha monoclonal antibody infliximab                                                                                                                                                      | Brandt, J, Haibel, H, Reddig, J, Sieper, J; Braun, J                                                                                                                                                                       | 2002 |
| Effects of high-dose mucosolvin on lung functions in infant patients with cardiopulmonary bypass                                                                                                                                                                                                             | Zhao, K, Wang, W, Zhang, J, Zhao, R, Chen, T, Su, J, Ma, C; Cui, Q                                                                                                                                                         | 2011 |
| Efficacy and safety of olokizumab in patients with rheumatoid arthritis with an inadequate response to TNF inhibitor therapy: outcomes of a randomised Phase IIb study                                                                                                                                       | Genovese, MC, Fleischmann, R, Furst, D, Janssen, N, Carter, J, Dasgupta, B, Bryson, J, Duncan, B, Zhu, W, Pitzalis, C, Durez, P; Kretsos, K                                                                                | 2014 |
| Prehabilitation in Frail Colon Cancer                                                                                                                                                                                                                                                                        | NCT03097224                                                                                                                                                                                                                | 2017 |
| Cardiac rehabilitation versus standard care after aortic aneurysm repair (Aneurysm CaRe): study protocol for a randomised controlled trial                                                                                                                                                                   | Bahia, SS, Holt, PJ, Ray, KK, Ussher, M, Poloniecki, JD, Sharma, R, Bown, MJ, Hinchliffe, RJ, Thompson, MM; Karthikesalingam, A                                                                                            | 2015 |
| Abnormal high-expression of CD154 on T lymphocytes of ankylosing spondylitis patients is down-regulated by etanercept treatment                                                                                                                                                                              | Lin, Q, Lin, Z, Gu, J, Huang, F, Li, T, Wei, Q, Liao, Z, Cao, S, Jiang, Y; Huang, J                                                                                                                                        | 2010 |
| Beating heart revascularization with or without cardiopulmonary bypass: evaluation of inflammatory response in a prospective randomized study                                                                                                                                                                | Wan, Y, Arifi, AA, Wan, S, Yip, JH, Sihoe, AD, Thung, KH, Wong, EM; Yim, AP                                                                                                                                                | 2004 |
| Effect of meloxicam on gingival crevicular fluid IL-1beta and IL1 receptor antagonist levels in subjects with chronic periodontitis, and its effects on clinical parameters                                                                                                                                  | Toker, H, Marakoglu, I; Poyraz, O                                                                                                                                                                                          | 2006 |
| Clinical and histological evaluation of a single high energy microwave treatment for primary axillary hyperhidrosis in Asians: a prospective, randomized, controlled, split-area comparative trial                                                                                                           | Kaminaka, C, Mikita, N, Inaba, Y, Kunimoto, K, Okuhira, H, Jinnin, M, Kao, B, Tanino, R, Tanioka, K, Shimokawa, T; Yamamoto, Y                                                                                             | 2019 |
| Treatment with levamisole and colchicine can result in a significant reduction of IL-6, IL-8 or TNF-alpha level in patients with mucocutaneous type of Behcet's disease                                                                                                                                      | Sun, A, Wang, YP, Chia, JS, Liu, BY; Chiang, CP                                                                                                                                                                            | 2009 |
| Systemic levels of endothelin correlate with systemic inflammation and not with myocardial injury or left ventricular ejection fraction in patients undergoing percutaneous coronary intervention and on-pump coronary artery bypass grafting                                                                | Cuculi, F, Lim, CC, van Gaal, W, Testa, L, Westaby, S, Arnold, JR, Neubauer, S; Banning, AP                                                                                                                                | 2011 |
| Colchicine for prevention of atrial fibrillation recurrence after pulmonary vein isolation: mid-term efficacy and effect on quality of life                                                                                                                                                                  | Deftereos, S, Giannopoulos, G, Efremidis, M, Kossyvakis, C, Katsivas, A, Panagopoulou, V, Papadimitriou, C, Karageorgiou, S, Doudoumis, K, Raisakis, K, Kaoukis, A, Alexopoulos, D, Manolis, AS, Stefanadis, C; Cleman, MW | 2014 |
| Randomised controlled trial of inhaled corticosteroids (fluticasone propionate) in cystic fibrosis                                                                                                                                                                                                           | Balfour-Lynn, IM, Klein, NJ; Dinwiddie, R                                                                                                                                                                                  | 1997 |
| Efficacy of scaling and root planning with and without adjunct Nd: YAG laser therapy on clinical periodontal parameters and gingival crevicular fluid interleukin 1-beta and tumor necrosis factor-alpha levels among patients with periodontal disease: a prospective randomized split-mouth clinical study | Abduljabbar, T, Vohra, F, Kellesarian, SV; Javed, F                                                                                                                                                                        | 2017 |
| Increased use of inhaled nitric oxide in single ventricle patients with low nasal nitric oxide undergoing congenital heart surgery                                                                                                                                                                           | Adams, PS, Zahid, M, Khalifa, O; Lo, CW                                                                                                                                                                                    | 2016 |
| CD4+CD28-T-cell expansions in anca-associated vasculitis are associated with arterial stiffness                                                                                                                                                                                                              | Chanouzas, D, Dyall, L, Dale, J, Moss, P, Morgan, MD; Harper, L                                                                                                                                                            | 2015 |
| Flaxseed Oil Supplementation Improve Gene Expression Levels of PPAR-γ, LP(a), IL-1 and TNF-α in Type 2 Diabetic Patients with Coronary Heart Disease                                                                                                                                                         | Hashemzadeh, AA, Nasoohi, N, Raygan, F, Aghadavod, E, Akbari, E, Taghizadeh, M, Memarzadeh, MR; Asemi, Z                                                                                                                   | 2017 |
| Nitric oxide decreases acute kidney injury and stage 3 chronic kidney disease after cardiac surgery                                                                                                                                                                                                          | Lei, C, Berra, L, Rezoagli, E, Yu, B, Dong, H, Yu, S, Hou, L, Chen, M, Chen, W, Wang, H, Zheng, Q, Shen, J, Jin, Z, Chen, T, Zhao, R, Christie, E, Sabbiseti, VS, Nordio, F, Bonventre, JV, Xiong, L; Zapol, WM            | 2018 |
| 5-Aminosalicylic Acid Modulates the Immune Response in Chronic Beryllium Disease Subjects                                                                                                                                                                                                                    | Day, BJ, Huang, J, Barkes, BQ, Gillespie, M, Li, L; Maier, LA                                                                                                                                                              | 2018 |
| Evaluation of cutaneous microcirculation of three cosmaceuticals containing different percentage of active (biotropicsFD101): an open, single centric, placebo control, intra-individual study in healthy volunteers                                                                                         | Ming, YK, Haris, HH, Vandana Kotak, C; Choudhary, YK                                                                                                                                                                       | 2013 |
| Pentoxifylline lowers plasminogen activator inhibitor 1 levels in obese individuals: a pilot study                                                                                                                                                                                                           | Muldowney, JA, Chen, Q, Blakemore, DL; Vaughan, DE                                                                                                                                                                         | 2012 |
| Relationship between non-specific prescription pill adherence and ischemic stroke outcomes                                                                                                                                                                                                                   | Ovbiagele, B, Campbell, S, Faiz, A; Chambless, LE                                                                                                                                                                          | 2010 |
| ASDAS, a highly discriminatory ASAS-endorsed disease activity score in patients with ankylosing spondylitis                                                                                                                                                                                                  | van der Heijde, D, Lie, E, Kvien, TK, Sieper, J, Van den Bosch, F, Listing, J, Braun, J; Landewé, R                                                                                                                        | 2009 |
| Modified glucose-insulin-potassium regimen provides cardiac and renal protection with improved tissue perfusion and metabolism in patients undergoing cardiopulmonary bypass surgery                                                                                                                         | Li, J, Zhao, K, Zhang, Y, Cui, Q, Zhao, R, Yang, J, Yu, S, Yi, D; Gao, F                                                                                                                                                   | 2015 |

|                                                                                                                                                                                                                                               |                                                                                                                                                                           |      |
|-----------------------------------------------------------------------------------------------------------------------------------------------------------------------------------------------------------------------------------------------|---------------------------------------------------------------------------------------------------------------------------------------------------------------------------|------|
| The Effects of Probiotic Supplementation on Gene Expression Related to Inflammation, Insulin, and Lipids in Patients With Multiple Sclerosis: a Randomized, Double-Blind, Placebo-Controlled Trial                                            | Tamtaji, , OR, Kouchaki, E, Salami, M, Aghadavod, E, Akbari, E, Tajabadi-Ebrahimi, M; Asemi, Z                                                                            | 2017 |
| Cardioprotective effect of transcutaneous electric acupoint stimulation in the pediatric cardiac patients: a randomized controlled clinical trial                                                                                             | Ni, , X, Xie, Y, Wang, Q, Zhong, H, Chen, M, Wang, F; Xiong, L                                                                                                            | 2012 |
| Early onset hyperuricemia is a prognostic marker for kidney allograft dysfunction                                                                                                                                                             | Jung, , IM, Han, M, Yang, SH, Park, S-K, Han, DJ, Kim, YS, Kim, YH; Lee, JP                                                                                               | 2016 |
| Effect of erythropoietin on the incidence of acute kidney injury following complex valvular heart surgery: a double blind, randomized clinical trial of efficacy and safety                                                                   | Kim, , JH, Shim, JK, Song, JW, Song, Y, Kim, HB; Kwak, YL                                                                                                                 | 2013 |
| Adjunctive benefits of subantimicrobial dose doxycycline in the management of severe, generalized, chronic periodontitis                                                                                                                      | Novak, , MJ, Johns, LP, Miller, RC; Bradshaw, MH                                                                                                                          | 2002 |
| Side effects from intense pulsed light: importance of skin pigmentation, fluence level and ultraviolet radiation-A randomized controlled trial                                                                                                | Thaysen-Petersen, , D, Erlandsson, AM, Nash, JF, Beerwerth, F, Philipsen, PA, Wulf, HC, Paasch, U; Haedersdal, M                                                          | 2017 |
| Peritoneal dialysis does not adversely affect kidney function recovery after congenital heart surgery                                                                                                                                         | Riley, , AA, Jefferies, JL, Nelson, DP, Bennett, MR, Blinder, JJ, Ma, Q, Devarajan, P; Goldstein, SL                                                                      | 2014 |
| Efficacy and safety of the selective co-stimulation modulator abatacept following 2 years of treatment in patients with rheumatoid arthritis and an inadequate response to anti-tumour necrosis factor therapy                                | Genovese, , MC, Schiff, M, Luggen, M, Becker, JC, Aranda, R, Teng, J, Li, T, Schmidely, N, Le Bars, M; Dougados, M                                                        | 2008 |
| The effects of omega-3 and vitamin E co-supplementation on parameters of mental health and gene expression related to insulin and inflammation in subjects with polycystic ovary syndrome                                                     | Jamilian, , M, Shojaei, A, Samimi, M, Afshar Ebrahimi, F, Aghadavod, E, Karamali, M, Taghizadeh, M, Jamilian, H, Alaeinasab, S, Jafarnejad, S; Asemi, Z                   | 2018 |
| First-in-man results of a novel vascular graft coated with resorbable polymer for aortic reconstructions—a multicenter, non-randomized safety study                                                                                           | Halloul, , Z, Rimpler, H, Waliszewski, M, Beier, N, Meyer, F, Rappe, A, Fuellert, A; Tautenhahn, J                                                                        | 2014 |
| High-dose Vitamin D Supplements in Older Adults                                                                                                                                                                                               | NCT03613116                                                                                                                                                               | 2018 |
| Cardiovascular effects of tumour necrosis factor alpha antagonism in patients with acute myocardial infarction: a first in human study                                                                                                        | Padfield, , GJ, Din, JN, Koushiappi, E, Mills, NL, Robinson, SD, Le May Cruden, N, Lucking, AJ, Chia, S, Harding, SA; Newby, DE                                           | 2013 |
| Inspired supplemental oxygen reduces markers of oxidative stress during elective colon surgery                                                                                                                                                | García de la Asunción, , J, Belda, FJ, Greif, R, Barber, G, Viña, J; Sastre, J                                                                                            | 2007 |
| Blood cardioplegia with N-acetylcysteine may reduce coronary endothelial activation and myocardial oxidative stress                                                                                                                           | Rodrigues, , AJ, Evora, PR, Bassetto, S, Alves, L, Scorzoni Filho, A, Origuela, EA; Vicente, WV                                                                           | 2009 |
| Preoperative predictors of postsurgical adhesion formation and the Prevention of Adhesions with Plasminogen Activator (PAPA-study): results of a clinical pilot study                                                                         | Hellebrekers, , BW, Trimbo-Kemper, TC, Boesten, L, Jansen, FW, Kolkman, W, Trimbo, JB, Press, RR, van Poelgeest, MI, Emeis, SJ; Kooistra, T                               | 2009 |
| Effectiveness of pulmonary rehabilitation and correlations in between functional parameters, extent of thoracic surgery and severity of post-operative complications: randomized clinical trial                                               | Vagvolgyi, , A, Rozgonyi, Z, Kerti, M, Agathou, G, Vadasz, P; Varga, J                                                                                                    | 2018 |
| Preoperative oral feeding reduces stress response after laparoscopic cholecystectomy                                                                                                                                                          | Zelić, , M, Štimac, D, Mendrila, D, Tokmadžić, VS, Fišić, E, Uravić, M; Šustić, A                                                                                         | 2013 |
| Impact of vitamin D supplementation on inflammatory markers in African Americans: results of a four-arm, randomized, placebo-controlled trial                                                                                                 | Chandler, , PD, Scott, JB, Drake, BF, Ng, K, Manson, JE, Rifai, N, Chan, AT, Bennett, GG, Hollis, BW, Giovannucci, EL, Emmons, KM; Fuchs, CS                              | 2014 |
| Cardioprotective effect of pretreatment with beta-glucan in coronary artery bypass grafting                                                                                                                                                   | Aarsaether, , E, Rydningen, M, Einar Engstad, R; Busund, R                                                                                                                | 2006 |
| Dietary supplementation with rice bran fermented with <i>Lentinus edodes</i> increases interferon- activity without causing adverse effects: a randomized, double-blind, placebo-controlled, parallel-group study                             | Choi, , J-Y, Paik, D-J, Kwon, DY; Park, Y                                                                                                                                 | 2014 |
| No evidence of an effect of alterations in dietary fatty acids on fasting adiponectin over 3 weeks                                                                                                                                            | Lithander, , FE, Keogh, GF, Wang, Y, Cooper, GJ, Mulvey, TB, Chan, YK, McArdle, BH; Poppitt, SD                                                                           | 2008 |
| Pathologic Response, When Increased by Longer Interval, Is a Marker but Not the Cause of Good Prognosis in Rectal Cancer: 17-year Follow-up of the Lyon R90-01 Randomized Trial                                                               |                                                                                                                                                                           | 2016 |
| Preoperative peripheral plasma fibrinogen level is an independent prognostic marker in penile cancer                                                                                                                                          | Ma, , C, Zhou, Y, Zhou, S, Zhao, K, Lu, B; Sun, E                                                                                                                         | 2017 |
| Beneficial effects of 1-year optimal medical treatment with and without additional PTA on inflammatory markers of atherosclerosis in patients with PAD. Results from the Oslo Balloon Angioplasty versus Conservative Treatment (OBACT) study | Nyland, , M, Kroese, AJ, Morken, B, Stranden, E, Sandback, G, Lindahl, AK, Arnesen, H; Seljeflot, I                                                                       | 2007 |
| Effect of renin angiotensin system blockade on pentraxin 3 levels in type-2 diabetic patients with proteinuria                                                                                                                                | Yilmaz, , MI, Axelsson, J, Sonmez, A, Carrero, JJ, Saglam, M, Eyileten, T, Caglar, K, Kirkpantur, A, Celik, T, Oguz, Y, Vural, A, Yenicesu, M, Lindholm, B; Stenvinkel, P | 2009 |
| Thalidomide for the Treatment of Malnutrition Inflammation Syndrome in Peritoneal Dialysis Patients                                                                                                                                           | NCT00390247                                                                                                                                                               | 2006 |
| Omega-3 fatty acids-supplemented parenteral nutrition decreases hyperinflammatory response and attenuates systemic disease sequelae in severe acute pancreatitis: a randomized and controlled study                                           | Wang, , X, Li, W, Li, N; Li, J                                                                                                                                            | 2008 |
| Fresh whole blood versus reconstituted blood for pump priming in heart surgery in infants                                                                                                                                                     | Mou, , SS, Giroir, BP, Molitor-Kirsch, EA, Leonard, SR, Nikaidoh, H, Nizzi, F, Town, DA, Roy, LC, Scott, W; Stromberg, D                                                  | 2004 |
| A phase II multicenter trial to evaluate efficacy and safety of HF10 oncolytic virus immunotherapy and ipilimumab in patients with unresectable or metastatic melanoma                                                                        | Andtbacka, , RHI, Ross, M, Agarwala, S, Grossmann, K, Taylor, M, Vetto, J, Neves, R, Daud, A, Khong, H, Meek, SM, Ungerleider, R, Welden, S, Tanaka, M; Williams, M       | 2016 |
| A study of safety and efficacy of lenabasum in Cystic Fibrosis                                                                                                                                                                                | EUCTR2017-003723-29-GR                                                                                                                                                    | 2018 |

|                                                                                                                                                                                                                                                                           |                                                                                                                                                                                                                                     |      |
|---------------------------------------------------------------------------------------------------------------------------------------------------------------------------------------------------------------------------------------------------------------------------|-------------------------------------------------------------------------------------------------------------------------------------------------------------------------------------------------------------------------------------|------|
| Clinical trial of Methotrexate associated to Hydroxyurea versus placebo and Hydroxyurea in patients with sickle cell disease                                                                                                                                              | RBR-57qbjv                                                                                                                                                                                                                          | 2018 |
| Telomerase activator TA-65MD® in patients with ACS (TACTIC)                                                                                                                                                                                                               | ISRCTN16613292                                                                                                                                                                                                                      | 2018 |
| Physical exercise for hemodialysis patients                                                                                                                                                                                                                               | RBR-29s6x3                                                                                                                                                                                                                          | 2016 |
| Effect of the immunomodulating agent, pentoxifylline, in the treatment of sepsis in prematurely delivered infants: a placebo-controlled, double-blind trial                                                                                                               | Lauterbach, , R, Pawlik, D, Kowalczyk, D, Ksycinski, W, Helwich, E; Zembala, M                                                                                                                                                      | 1999 |
| Anti-TNF-induced remission in very early peripheral spondyloarthritis: the CRESPA study                                                                                                                                                                                   | Carron, , P, Varkas, G, Cypers, H, Van Praet, L, Elewaut, D; Van den Bosch, F                                                                                                                                                       | 2017 |
| Sepsis-induced cardiac dysfunction and beta-adrenergic blockade therapy for sepsis                                                                                                                                                                                        | Suzuki, , T, Suzuki, Y, Okuda, J, Kurazumi, T, Suhara, T, Ueda, T, Nagata, H; Morisaki, H                                                                                                                                           | 2017 |
| Protocol for the Imagine HEALTH Study: guided imagery lifestyle intervention to improve obesity-related behaviors and salivary cortisol patterns in predominantly Latino adolescents                                                                                      | Weigensberg, , MJ, Spruijt-Metz, D, Wen, CKF, Davis, JN, Avila, Q, Juarez, M, Brown-Wade, N; Lane, CJ                                                                                                                               | 2018 |
| Clinical factors affecting the survival of patients diagnosed with non-small cell lung cancer and metastatic malignant pleural effusion, treated with hyperthermic intrathoracic chemotherapy or chemical talc pleurodesis: a monocentric, prospective, randomized trial  | Sioga, , A, Pandria, N, Barbetakis, N, Lazopoulos, A, Katsikas, I, Asteriou, C, Paliouras, D, Kamperis, E, Ikonomidou, D, Papamitsou, T, Filippou, D, Destouni, C, Ikonomidou, L, Zarogoulidis, K, Papagiannopoulos, K; Kleontas, A | 2019 |
| Phase II Trial of Weekly Intravenous Paclitaxel plus Three Weekly Intraperitoneal Carboplatin Administration for Suboptimally Debulked Ovarian and Primary Peritoneal Carcinoma Incorporating Pharmacogenomic Analysis                                                    | JPRN-UMIN000001713                                                                                                                                                                                                                  | 2009 |
| CD19-CART01 in pediatric patients affected by relapsed/refractory CD19+ Acute Lymphoblastic Leukemia and Non Hodgkin Lymphoma                                                                                                                                             | EUCTR2017-002088-16-IT                                                                                                                                                                                                              | 2018 |
| Clinical efficacy of nitroglycerin in patients with septic shock with ARDS                                                                                                                                                                                                | Liu, , L-P, Li, B, Zhu, L, Dou, Z-M; Li, Y-M                                                                                                                                                                                        | 2015 |
| Efficacy and safety of thalidomide in pediatric patients with Crohn's disease                                                                                                                                                                                             | EUCTR2016-000786-24-IT                                                                                                                                                                                                              | 2016 |
| Effects of Quercetin on plasma total antioxidant capacity, lipid peroxidation, blood pressure, inflammatory markers and disease activity in patients with Rheumatoid Arthritis                                                                                            | IRCT138807252394N2                                                                                                                                                                                                                  | 2010 |
| An Open Label, 1-Year Trial, including a Double-Blind Placebo-Controlled Withdrawal Period, of Setmelanotide (RM-493), a Melanocortin 4 Receptor (MC4R) Agonist, in Early Onset POMC Deficiency Obesity due to Bi-Allelic Loss-of-Function POMC or PCSK1 Genetic Mutation | EUCTR2016-002320-83-DE                                                                                                                                                                                                              | 2016 |
| Randomized controlled trial of Stopping Perioperative Angiotensin-II Converting Enzyme inhibitors and/or Angiotensin Receptor Blockers in major noncardiac surgery                                                                                                        | EUCTR2016-004141-90-GB                                                                                                                                                                                                              | 2018 |
| Study of Durvalumab or Placebo Given along with Platinum-based Chemo-radiation Therapy in Patients with Locally Advanced where cancer cannot be removed completely through surgery for Non-small Cell Lung Cancer (Stage III)                                             | CTRI/2018/07/014783                                                                                                                                                                                                                 | 2018 |
| Effects of Different Volatile Anesthetics on Cytokine and Chemokine Production After Ischemia-Reperfusion Injury in Patients Undergoing Living-Donor Kidney Transplant                                                                                                    | Savran Karadeniz, , M, Senturk Ciftci, H, Tefik, T, Oktar, T, Nane, I, Turkmen, A, Oguz, F; Tugrul, KM                                                                                                                              | 2019 |
| Efficacy and safety of pulsed infusions of levosimendan in outpatients with advanced heart failure                                                                                                                                                                        | EUCTR2008-007407-86-DE                                                                                                                                                                                                              | 2011 |
| Anti-inflammatory effects of exercise training in the skeletal muscle of patients with chronic heart failure                                                                                                                                                              | Gielen, , S, Adams, V, Möbius-Winkler, S, Linke, A, Erbs, S, Yu, J, Kempf, W, Schubert, A, Schuler, G; Hambrecht, R                                                                                                                 | 2003 |
| Effect of homocysteine-lowering treatment with folic acid plus vitamin B6 on progression of subclinical atherosclerosis: a randomised, placebo-controlled trial                                                                                                           | Vermeulen, , EG, Stehouwer, CD, Twisk, JW, van den Berg, M, de Jong, SC, Mackaay, AJ, van Campen, CM, Visser, FC, Jakobs, CA, Bulterjris, EJ; Rauwerda, JA                                                                          | 2000 |
| Every-other-week methotrexate in patients with rheumatoid arthritis. A double-blind, placebo-controlled prospective study                                                                                                                                                 | Kremer, , JM, Davies, JM, Rynes, RI, Fink, S, Lawrence, DA, Petrillo, GF; Mullaly, PM                                                                                                                                               | 1995 |
| STUDY OF THE EFFECTIVENESS OF THE COMBINED TREATMENT WITH DONEPEZIL, INTENSIVE REHABILITATION AND ELECTRIC STIMULATION OF THE BRAIN IN PATIENTS WITH AFASIA AFTER STROKE                                                                                                  | EUCTR2017-002858-36-ES                                                                                                                                                                                                              | 2018 |
| A Rheumatoid Arthritis Study to Test the Safety, Tolerability, and Efficacy of MK-8457 in Patients with an Inadequate Response or Intolerance to Anti-TNF-alpha Therapy                                                                                                   | ACTRN12612000774820                                                                                                                                                                                                                 | 2012 |
| A clinical trial of MDNA55 in adults with a brain tumour                                                                                                                                                                                                                  | EUCTR2016-003841-27-PL                                                                                                                                                                                                              | 2017 |
| Efficacy of Melatonin on Serum Pro-inflammatory Cytokines and Oxidative Stress Markers in Relapsing Remitting Multiple Sclerosis                                                                                                                                          | Sánchez-López, , AL, Ortiz, GG, Pacheco-Moises, FP, Mireles-Ramírez, MA, Bitzer-Quintero, OK, Delgado-Lara, DLC, Ramírez-Jirano, LJ; Velázquez-Brizuela, IE                                                                         | 2018 |
| A study of safety and efficacy of lenabasum in Cystic Fibrosis                                                                                                                                                                                                            | EUCTR2017-003723-29-PT                                                                                                                                                                                                              | 2018 |
| Clinical trial to demonstrate safety and efficacy of an intravenous (i.v.) administration of Feramyl compared to i.v. Ferinject and to iron tablets in patients with iron deficiency diagnosis before a planned operation who develop anaemia after surgery               | EUCTR2017-003439-12-DE                                                                                                                                                                                                              | 2017 |
| Community-Acquired Pneumonia : evaluation of Corticosteroids (CAPE COD)                                                                                                                                                                                                   | EUCTR2015-001239-19-FR                                                                                                                                                                                                              | 2015 |
| Liposomal bupivacaine in knee replacement surgery                                                                                                                                                                                                                         | ISRCTN54191675                                                                                                                                                                                                                      | 2017 |

|                                                                                                                                                                                                                                                                                       |                                                                                                                                                 |      |
|---------------------------------------------------------------------------------------------------------------------------------------------------------------------------------------------------------------------------------------------------------------------------------------|-------------------------------------------------------------------------------------------------------------------------------------------------|------|
| Clinical study to assess the efficacy and safety of GFT505 80 mg and GFT505 120 mg daily for 52 weeks in Patients with Non-Alcoholic Steatohepatitis (accumulation of fat in the liver associated with inflammation and liver cell injury at microscopic examination of liver biopsy) | EUCTR2012-000295-42-NL                                                                                                                          | 2012 |
| The effect of green tea tablets in the treatment of polycystic ovary syndrome                                                                                                                                                                                                         | IRCT2015021816123N4                                                                                                                             | 2015 |
| A clinical study of recurrent ovarian ovarian cancer in the treatment of platinum resistance in apatinib tablet                                                                                                                                                                       | ChiCTR-OPN-17011652                                                                                                                             | 2017 |
| Phase 2 Study to see if QPI-1002 is effective and safe of for the Prevention of Acute Kidney Injury in Subjects at High Risk for AKI following Cardiac Surgery                                                                                                                        | EUCTR2015-003113-15-DE                                                                                                                          | 2016 |
| (OSKIRA-3): a PHASE III, MULTI-CENTRE, RANDOMIZED, DOUBLE-BLIND, PLACEBO-CONTROLLED, PARALLEL GROUP STUDY OF TWO DOSING REGIMENS OF FOSTAMATINIB DISODIUM IN RHEUMATOID ARTHRITIS PATIENTS WOTH INADEQUATE RESPONSE TO A TNF-ALPHA ANTAGONIST                                         | PER-003-12                                                                                                                                      | 2012 |
| Intermittent furosemide therapy as a prophylaxis of acute renal failure in CABG patients                                                                                                                                                                                              | IRCT201502122804N8                                                                                                                              | 2015 |
| Antioxidant therapy in implementing lithotripsy in patients with renal lithiasis                                                                                                                                                                                                      | ISRCTN98702137                                                                                                                                  | 2010 |
| Phyllanthus amarus for the protection of liver health                                                                                                                                                                                                                                 | ISRCTN90321640                                                                                                                                  | 2012 |
| A PHASE 3, MULTICENTER, RANDOMIZED, DOUBLED-BLIND, PLACEBO-CONTROLLED STUDY TO EVALUATE THE EFFICACY AND SAFETY OF LY2127399 IN PATIENTS WITH MODERATE TO SEVERE RHEUMATOID ARTHRITIS (RA) WHO HAD AN INADEQUATE RESPONSE TO ONE OR MORE TNF- $\alpha$ INHIBITORS                     | PER-088-11                                                                                                                                      | 2012 |
| A Study of IMM 101 in combination with various standard cancer treatments in patients with advanced cancer or cancer which cannot be removed by surgery                                                                                                                               | EUCTR2016-001459-28-GB                                                                                                                          | 2016 |
| Off-pump coronary bypass operations significantly reduce S100 release: an indicator for less cerebral damage?                                                                                                                                                                         | Wandschneider, , W, Thalmann, M, Trampitsch, E, Ziervogel, G; Kobinia, G                                                                        | 2000 |
| Randomized evaluation of the safety and efficacy of enoxaparin versus unfractionated heparin in high-risk patients with non-ST-segment elevation acute coronary syndromes receiving the glycoprotein IIb/IIIa inhibitor eptifibatide                                                  | Goodman, , SG, Fitchett, D, Armstrong, PW, Tan, M; Langer, A                                                                                    | 2003 |
| A PHASE 2A, RANDOMIZED, DOUBLE-BLIND, PLACEBO-CONTROLLED STUDY TO EVALUATE THE EFFICACY, SAFETY AND PHARMACOKINETICS OF ORALLY ADMINISTERED ALS-008176 IN ADULTS HOSPITALIZED WITH A RESPIRATORY SYNCYTIAL VIRUS-RELATED ILLNESS                                                      | PER-014-16                                                                                                                                      | 2016 |
| A Study to Evaluate the Efficacy and Safety of Ustekinumab in the Treatment of Anti-TNF(alpha) Refractory Participants With Active Radiographic Axial Spondyloarthritis                                                                                                               | EUCTR2015-000288-16-DE                                                                                                                          | 2015 |
| Pembrolizumab as First Line Treatment in Subjects with Recurrent/Metastatic HNSCC                                                                                                                                                                                                     | PER-016-15                                                                                                                                      | 2015 |
| A clinical study on the application of physostigminsalicylate (Anticholium®) as auxiliary measure in perioperative blood poisoning/its life-threatening form                                                                                                                          | EUCTR2012-001650-26-DE                                                                                                                          | 2012 |
| An Open Label, 1-Year Trial, including a Double-Blind Placebo-Controlled Withdrawal Period, of Setmelanotide (RM-493), a Melanocortin 4 Receptor (MC4R) Agonist, in Early Onset POMC Deficiency Obesity due to Bi-Allelic Loss-of-Function POMC or PCSK1 Genetic Mutation             | EUCTR2016-002320-83-ES                                                                                                                          | 2018 |
| A Phase II Study Of Sunitinib And Low Dose Metronomic Cyclophosphamide In Advanced Renal Cell Cancer - SUN-CYCL (Sunitinib + Cyclophosphamide in RCC)                                                                                                                                 | EUCTR2008-008676-13-GB                                                                                                                          | 2009 |
| A multicenter, randomized, double-blind, parallel-arm, two-stage study of the efficacy and safety of AVE0005 (VEGF Trap) administered intravenously every 2 weeks in patients with platinum-resistant and topotecan- and/or liposomal doxorubicin-resistant advanced ovarian cancer   | EUCTR2005-005024-14-PT                                                                                                                          | 2006 |
| To estimate and compare blood sugar levels and a biomarker in gingival fluid in gum disease patients with diabetes before and after teeth cleaning and laser treatment                                                                                                                | CTRI/2018/05/013807                                                                                                                             | 2018 |
| Immune responses in the treatment of drug-sensitive pulmonary tuberculosis with phenylbutyrate and vitamin D3 as host directed therapy                                                                                                                                                | Rekha, , RS, Mily, A, Sultana, T, Haq, A, Ahmed, S, Mostafa Kamal, SM, van Schadewijk, A, Hiemstra, PS, Gudmundsson, GH, Agerberth, B; Raqib, R | 2018 |
| Preliminary study: comparative effects of lung volume therapy between slow and fast deep-breathing techniques on pulmonary function, respiratory muscle strength, oxidative stress, cytokines, 6-minute walking distance, and quality of life in persons with COPD                    | Leelarungrayub, , J, Puntumetakul, R, Sriboonreung, T, Pothasak, Y; Klaphajone, J                                                               | 2018 |
| Phase IIa trial of MK0646 Tx in combo w/ Irinotecan vs Cetuximab and Irinotecan for mRC patients                                                                                                                                                                                      | EUCTR2012-000317-36-BE                                                                                                                          | 2012 |
| A multicenter, randomized, double-blind, placebo-controlled, parallel-group clinical trial to assess efficacy and safety of the herbal medicinal                                                                                                                                      | EUCTR2015-001952-31-DE                                                                                                                          | 2015 |



|                                                                                                                                                                                                                                                  |                                                                                                                                                                                                                                    |      |
|--------------------------------------------------------------------------------------------------------------------------------------------------------------------------------------------------------------------------------------------------|------------------------------------------------------------------------------------------------------------------------------------------------------------------------------------------------------------------------------------|------|
| product Sinupret extract coated tablets in patients with chronic rhinosinusitis                                                                                                                                                                  |                                                                                                                                                                                                                                    |      |
| A feasibility trial to evaluate the use of an an imaging biomarker called magnetic resonance tumour regression grade (mrTRG) to identify and manage good and poor responders to chemoradiotherapy for use in patients with rectal (bowel) cancer | EUCTR2015-003009-40-GB                                                                                                                                                                                                             | 2015 |
| Effect of training and ginger on obesity                                                                                                                                                                                                         | IRCT201008304663N1                                                                                                                                                                                                                 | 2012 |
| A Phase 3, Randomized, Placebo-Controlled, Blinded, Multicenter Study of the Induction and Maintenance of Clinical Response and Remission by Vedolizumab (MLN0002) in Patients with Moderate to Severe Crohn's Disease                           | EUCTR2008-002783-33-EE                                                                                                                                                                                                             | 2008 |
| Effect of pre-operative pain treatment on postoperative outcome after total hip or knee replacement surgery                                                                                                                                      | EUCTR2013-004313-41-NL                                                                                                                                                                                                             | 2014 |
| ORENCIA VERSUS ROACTEMRA BY SUBCUTANEOUS ADMINISTRATION FOR THE TREATMENT OF RHEUMATOID ARTHRITIS IN TNF ALPHA INHIBITOR INADEQUATE RESPONDER PATIENTS                                                                                           | EUCTR2017-000947-41-FR                                                                                                                                                                                                             | 2017 |
| Venlafaxine vs. paroxetine in the acute phase of treatment for major depressive disorder among Han Chinese population in Taiwan                                                                                                                  | Wu, , Y-S, Chen, Y-C; Lu, R-B                                                                                                                                                                                                      | 2007 |
| Prenatal vitamin D supplementation reduces risk of asthma/recurrent wheeze in early childhood: a combined analysis of two randomized controlled trials                                                                                           | Wolsk, , HM, Chawes, BL, Litonjua, AA, Hollis, BW, Waage, J, Stokholm, J, Bonnelykke, K, Bisgaard, H; Weiss, ST                                                                                                                    | 2017 |
| Effect of remote ischemia or nicorandil on myocardial injury following percutaneous coronary intervention in patients with stable coronary artery disease: a randomized controlled trial                                                         | Miyoshi, , T, Ejiri, K, Kohno, K, Nakahama, M, Doi, M, Munemasa, M, Murakami, M, Takaishi, A, Kawai, Y, Sato, T, Sato, K, Oka, T, Takahashi, N, Sakuragi, S, Mima, A, Enko, K, Hosogi, S, Nanba, S, Hirami, R, Nakamura, K; Ito, H | 2017 |
| Effect of Bosentan on Claudication Distance and Endothelium-Dependent Vasodilation in Hispanic Patients With Peripheral Arterial Disease                                                                                                         | De Haro, , J, Bleda, S, Varela, C, Esparza, L; Acin, F                                                                                                                                                                             | 2016 |
| High Loading Dose of Atorvastatin for the Prevention of Serum Creatinine and Cystatin C-Based Contrast-Induced Nephropathy Following Percutaneous Coronary Intervention                                                                          | Fu, , N, Liang, M; Yang, S                                                                                                                                                                                                         | 2018 |
| Effect of Micronized Purified Flavonoid Fraction Therapy on Endothelin-1 and TNF- $\alpha$ Levels in Relation to Antioxidant Enzyme Balance in the Peripheral Blood of Women with Varicose Veins                                                 | Pietrzycka, , A, Kózka, M, Urbanek, T, Stpniewski, M; Kucharzewski, M                                                                                                                                                              | 2015 |
| The effect of exercise training on cardiac remodelling in children and young adults with corrected tetralogy of Fallot or Fontan circulation: a randomized controlled trial                                                                      | Duppen, , N, Kapusta, L, de Rijke, YB, Snoeren, M, Kuipers, IM, Koopman, LP, Blank, AC, Blom, NA, Dulfer, K, Utens, EM, Hopman, MT; Helbing, WA                                                                                    | 2015 |
| Effects of periodontal basic treatment on periodontal condition,clinical response and serum inflammatory parameters in rheumatoid arthritis (RA) patients with moderate to severe periodontitis                                                  | Xiao, , F, Zhang, P, Li, X, Mou, Y, Chen, H; Cai, Y                                                                                                                                                                                | 2017 |
| Randomized trial of fish oil infusion to prevent atrial fibrillation after cardiac surgery: data from an implantable continuous cardiac monitor                                                                                                  |                                                                                                                                                                                                                                    | 2014 |
| Effects of ingestion of Krill oil on quality of life related to mild knee pain: a randomized double-blind placebo-controlled trial                                                                                                               | Watanabe, , H, Matahira, Y, Suzuki, N; Takara, T                                                                                                                                                                                   | 2017 |
| Nuclear imaging techniques in the assessment of myocardial perfusion and function after CABG: does it correlate with CK-MB elevation?                                                                                                            | Kwinecki, , P, Jemielity, M, Czepczyński, R, Baszko, A, Ruchała, M, Sowiński, J; Dyszkiewicz, W                                                                                                                                    | 2003 |
| Fixed-dose combination fenofibrate/pravastatin 160/40 mg versus simvastatin 20 mg monotherapy in adults with type 2 diabetes and mixed hyperlipidemia uncontrolled with simvastatin 20 mg: a double-blind, randomized comparative study          | Farnier, , M, Steinmetz, A, Retterstøl, K; Császár, A                                                                                                                                                                              | 2011 |
| Pharmacokinetic characteristics of ibandronate and tolerability of DP-R206 (150 mg Ibandronate/24,000 IU Vitamin D3) compared to the ibandronate (150 mg) monotherapy in healthy adults                                                          | Choi, , HY, Kim, MJ, Kim, YH, Noh, Y-H, Lee, J-W, Lee, T-W, Kim, M-G; Bae, K-S                                                                                                                                                     | 2014 |
| Oral paricalcitol versus oral calcitriol in continuous ambulatory peritoneal dialysis patients with secondary hyperparathyroidism                                                                                                                | Jamaluddin, , EJ, Gafor, AH, Yean, LC, Cader, R, Mohd, R, Kong, NC; Shah, SA                                                                                                                                                       | 2014 |
| Rosiglitazone reduces insulin requirement and C-reactive protein levels in type 2 diabetic patients receiving peritoneal dialysis                                                                                                                | Wong, , TY, Szeto, CC, Chow, KM, Leung, CB, Lam, CW; Li, PK                                                                                                                                                                        | 2005 |
| Weight gain and increased concentrations of receptor proteins for tumor necrosis factor after patients with symptomatic HIV infection received fortified nutrition support                                                                       | Süttmann, , U, Ockenga, J, Schneider, H, Selberg, O, Schlesinger, A, Gallati, H, Wolfram, G, Deicher, H; Müller, MJ                                                                                                                | 1996 |
| Long-term anti-tumour necrosis factor therapy reverses the progression of carotid intima-media thickness in female patients with active rheumatoid arthritis                                                                                     | Ferrante, , A, Giardina, AR, Ciccica, F, Parrinello, G, Licata, G, Avellone, G, Giardina, E, Impastato, R; Triolo, G                                                                                                               | 2009 |
| Interleukin-1 blockade in heart failure with preserved ejection fraction: rationale and design of the Diastolic Heart Failure Anakinra Response Trial 2 (D-HART2)                                                                                | Van Tassell, , BW, Buckley, LF, Carbone, S, Trankle, CR, Canada, JM, Dixon, DL, Abouzaki, N, Oddi-Erdle, C, Biondi-Zoccai, G, Arena, R; Abbate, A                                                                                  | 2017 |
| Predicting treatable traits for long-acting bronchodilators in patients with stable COPD                                                                                                                                                         | Kang, , J, Kim, KT, Lee, JH, Kim, EK, Kim, TH, Yoo, KH, Lee, JS, Kim, WJ, Kim, JH; Oh, YM                                                                                                                                          | 2017 |
| Sustained efficacy, safety and patient-reported outcomes of certolizumab pegol in axial spondyloarthritis: 4-year outcomes from RAPID-axSpA                                                                                                      | van der Heijde, , D, Dougados, M, Landewé, R, Sieper, J, Maksymowych, WP, Rudwaleit, M, Van den Bosch, F, Braun, J, Mease, PJ, Kivitz, AJ, Walsh, J, Davies, O, Bauer, L, Hoepken, B, Peterson, L; Deodhar, A                      | 2017 |
| Lessons from ATTIRE feasibility study: differential inflammatory response profiles following treatment with albumin correlate with 6 months survival                                                                                             | Becares, , N, Harmala, S, China, L, Skene, SS, Bennett, K, Shabir, Z; O'brien, A                                                                                                                                                   | 2018 |

|                                                                                                                                                                                          |                                                                                                                                                                                 |      |
|------------------------------------------------------------------------------------------------------------------------------------------------------------------------------------------|---------------------------------------------------------------------------------------------------------------------------------------------------------------------------------|------|
| Efficacy and tolerability of diphenyl-dimethyl-dicarboxylate plus garlic oil in patients with chronic hepatitis                                                                          | Lee, , MH, Kim, YM; Kim, SG                                                                                                                                                     | 2012 |
| The randomized clinical trial of coenzyme Q10 for the prevention of periprocedural myocardial injury following elective percutaneous coronary intervention                               | Aslanabadi, , N, Safaie, N, Asgharzadeh, Y, Houshmand, F, Ghaffari, S, Garjani, A, Dousti, S, Hamishhekar, H; Entezari-Maleki, T                                                | 2016 |
| Impacts of intensive insulin therapy in patients undergoing heart valve replacement                                                                                                      | Zheng, , R, Gu, C, Wang, Y, Yang, Z, Dou, K, Wang, J, Yu, S, Wang, H, Xie, J, Wang, Y, Yi, D; Pei, J                                                                            | 2010 |
| Effect on Periodontal Markers by Bleaching Intracoronary Technique                                                                                                                       | NCT02718183                                                                                                                                                                     | 2016 |
| Lebrikizumab treatment in adults with asthma                                                                                                                                             | Corren, , J, Lemanske, RF, Hanania, NA, Korenblat, PE, Parsey, MV, Arron, JR, Harris, JM, Scheerens, H, Wu, LC, Su, Z, Mosesova, S, Eisner, MD, Bohen, SP; Matthews, JG         | 2011 |
| Effect of rosuvastatin therapy on troponin I release following percutaneous coronary intervention in nonemergency patients (from the TIP 3 study)                                        | Veselka, , J, Hájek, P, Tomašev, P, Tesař, D, Brůhová, H, Matějovič, M, Branny, M, Studenčan, M; Zemánek, D                                                                     | 2014 |
| Treating periodontal disease in patients with ST-elevation myocardial infarction: a randomized clinical trial                                                                            | Lobo, , MG, Dipp, T, Petry, I, Schmidt, K, Moura, M, Gazeta, C, Azeredo, M, Wang, Y, Lopes, R, Pellanda, L, Gottschall, C; Galougahi, KK                                        | 2016 |
| Eldecalcitol improves chair-rising time in postmenopausal osteoporotic women treated with bisphosphonates                                                                                | Iwamoto, , J; Sato, Y                                                                                                                                                           | 2014 |
| Treatment with high-dose n-3 PUFAs has no effect on platelet function, coagulation, metabolic status or inflammation in patients with atherosclerosis and type 2 diabetes                | Poreba, , M, Mostowik, M, Siniarski, A, Golebiowska-Wiatrak, R, Malinowski, KP, Haberk, M, Konduracka, E, Nessler, J, Undas, A; Gajos, G                                        | 2017 |
| Myocardial damage prevented by volatile anesthetics: a multicenter randomized controlled study                                                                                           | Guarracino, , F, Landoni, G, Tritapepe, L, Pompei, F, Leoni, A, Aletti, G, Scandroglio, AM, Maselli, D, De Luca, M, Marchetti, C, Crescenzi, G; Zangrillo, A                    | 2006 |
| Adalimumab improves treatment satisfaction with medication (TS-M) in patients with moderate to severe Hidradenitis Suppurativa (HS) in a 12-week randomised controlled trial (PIONEER I) | Jemec, , GB, Sundaram, M, Pinsky, B, Gu, Y, Williams, D; Bao, Y                                                                                                                 | 2014 |
| Safety and effectiveness of rituximab in patients with rheumatoid arthritis following an inadequate response to 1 prior tumor necrosis factor inhibitor: the RESET trial                 | Haraoui, , B, Bokarewa, M, Kallmeyer, I; Bykerk, VP                                                                                                                             | 2011 |
| Pharmacokinetic/pharmacodynamic relationships of FTY720 in kidney transplant recipients                                                                                                  | Park, , SI, Felipe, CR, Machado, PG, Garcia, R, Skerjanec, A, Schmouder, R, Tedesco-Silva, H; Medina-Pestana, JO                                                                | 2005 |
| Effect of Interactive Neurostimulation Therapy on Inflammatory Response in Patients With Chronic and Recurrent Mechanical Neck Pain                                                      | Teodorczyk-Injeyan, , JA, Triano, JJ, McGregor, M, Woodhouse, L; Injeyan, HS                                                                                                    | 2015 |
| The safety of autologous and metabolically fit bone marrow mesenchymal stromal cells in medically refractory Crohn's disease - a phase 1 trial with three doses                          |                                                                                                                                                                                 | 2016 |
| A phase III study of infliximab and corticosteroids for the initial treatment of acute graft-versus-host disease                                                                         | Couriel, , DR, Saliba, R, de Lima, M, Giral, S, Andersson, B, Khouri, I, Hosing, C, Ippoliti, C, Shpall, EJ, Champlin, R; Alousi, A                                             | 2009 |
| Immunomodulation in type 1 diabetes by NBI-6024, an altered peptide ligand of the insulin B epitope                                                                                      | Alleva, , DG, Maki, RA, Putnam, AL, Robinson, JM, Kipnes, MS, Dandona, P, Marks, JB, Simmons, DL, Greenbaum, CJ, Jimenez, RG, Conlon, PJ; Gottlieb, PA                          | 2006 |
| Prucalopride, a systemic enterokinetic, for the treatment of constipation                                                                                                                | Emmanuel, , AV, Roy, AJ, Nicholls, TJ; Kamm, MA                                                                                                                                 | 2002 |
| Calf raise exercise increases walking performance in patients with intermittent claudication                                                                                             | Van Schaardenburgh, , M, Wohlgend, M, Rognmo, Ø; Mattsson, E                                                                                                                    | 2017 |
| Transplantation of autologous bone marrow mononuclear cells on patients with idiopathic dilated cardiomyopathy: early results on effect and security                                     | Huang, , RC, Yao, K, Li, YL, Zhang, YQ, Xu, SK, Shi, HY, Pan, CZ, Yang, S, Zhang, SH, Ge, L, Niu, YH, Zhang, F, Qian, JY, Zou, YZ; Ge, JB                                       | 2006 |
| Effects of SPR periodontal basic therapy on cervical crevicular fluid C-reactive protein in patients with chronic periodontitis                                                          | Zhong, , ZQ; Fu, H                                                                                                                                                              | 2018 |
| Prospective randomized trial of heated humidified versus cold dry carbon dioxide insufflation during laparoscopic gastric bypass                                                         | Champion, , JK; Williams, M                                                                                                                                                     | 2006 |
| Healing response to non-surgical periodontal therapy in patients with diabetes mellitus: clinical, microbiological, and immunologic results                                              | Christgau, , M, Palitzsch, KD, Schmalz, G, Kreiner, U; Frenzel, S                                                                                                               | 1998 |
| Bezafibrate improves postprandial hypertriglyceridemia and associated endothelial dysfunction in patients with metabolic syndrome: a randomized crossover study                          | Ohno, , Y, Miyoshi, T, Noda, Y, Oe, H, Toh, N, Nakamura, K, Kohno, K, Morita, H; Ito, H                                                                                         | 2014 |
| Outcome of rheumatoid arthritis following adjunct statin therapy                                                                                                                         | Das, , S, Mohanty, M; Padhan, P                                                                                                                                                 | 2015 |
| Randomized clinical trial of folate supplementation in patients with peripheral arterial disease                                                                                         | Khandanpour, , N, Armon, MP, Jennings, B, Finglas, PM, Willis, G, Clark, A; Meyer, FJ                                                                                           | 2009 |
| Randomized, controlled trial of recombinant human interleukin-11 in patients with active Crohn's disease                                                                                 | Sands, , BE, Winston, BD, Salzberg, B, Safdi, M, Barish, C, Wruble, L, Wilkins, R, Shapiro, M; Schwertschlag, US                                                                | 2002 |
| Headache in the Emergency Department (ED) - A Multi-Center Research Network to Optimize the ED Treatment of Migraines                                                                    | NCT00122278                                                                                                                                                                     | 2005 |
| Bivalirudin inhibits periprocedural platelet function and tissue factor expression of human smooth muscle cells                                                                          | Pepke, , W, Eisenreich, A, Jaster, M, Ayral, Y, Bobbert, P, Mayer, A, Schultheiss, HP; Rauch, U                                                                                 | 2013 |
| Long-term efficacy and safety of etanercept after readministration in patients with active ankylosing spondylitis                                                                        | Brandt, , J, Listing, J, Haibel, H, Sörensen, H, Schwebig, A, Rudwaleit, M, Sieper, J; Braun, J                                                                                 | 2005 |
| Low dose dopamine infusion reduces renal tubular injury following cardiopulmonary bypass surgery                                                                                         | Sumeray, , M, Robertson, C, Lapsley, M, Bomanji, J, Norman, AG; Woolfson, RG                                                                                                    | 2001 |
| Individualized Angiotensin-Converting Enzyme (ACE)-Inhibitor Therapy in Stable Coronary Artery Disease Based on Clinical and                                                             | Oemrawsingh, , RM, Akkerhuis, KM, Van Vark, LC, Redekop, WK, Rudez, G, Remme, WJ, Bertrand, ME, Fox, KM, Ferrari, R, Danser, AH, de Maat, M, Simoons, ML, Brugs, JJ; Boersma, E | 2016 |

|                                                                                                                                                                                                                                                             |                                                                                                                                                                                                    |      |
|-------------------------------------------------------------------------------------------------------------------------------------------------------------------------------------------------------------------------------------------------------------|----------------------------------------------------------------------------------------------------------------------------------------------------------------------------------------------------|------|
| Pharmacogenetic Determinants: the PERindopril GENetic (PERGENE) Risk Model                                                                                                                                                                                  |                                                                                                                                                                                                    |      |
| Methotrexate in the Treatment of Axial Spondyloarthritis                                                                                                                                                                                                    | NCT00298012                                                                                                                                                                                        | 2006 |
| Adalimumab: new preparation. Rheumatoid arthritis: no therapeutic advance                                                                                                                                                                                   |                                                                                                                                                                                                    | 2004 |
| Niclosamide as an adjuvant to etanercept in treatment patients with active rheumatoid arthritis: an 8-week randomized controlled pilot study                                                                                                                | Al-Gareeb, , AIA, Gorial, FI; Mahmood, AS                                                                                                                                                          | 2018 |
| Efficacy of a novel PEGylated humanized anti-TNF fragment (CDP870) in patients with rheumatoid arthritis: a phase II double-blinded, randomized, dose-escalating trial                                                                                      | Choy, , EH, Hazleman, B, Smith, M, Moss, K, Lisi, L, Scott, DG, Patel, J, Sopwith, M; Isenberg, DA                                                                                                 | 2002 |
| Safety and Efficacy of Bempedoic Acid to Reduce LDL Cholesterol                                                                                                                                                                                             | Ray, , KK, Bays, HE, Catapano, AL, Lalwani, ND, Bloedon, LT, Sterling, LR, Robinson, PL; Ballantyne, CM                                                                                            | 2019 |
| Warm induction cardioplegia and reperfusion dose influence the occurrence of the post CABG TnI level                                                                                                                                                        | Ji, , B, Liu, M, Lu, F, Liu, J, Wang, G, Feng, Z; Hu, Q                                                                                                                                            | 2006 |
| The effect of exercise intensity on the response to exercise rehabilitation in patients with intermittent claudication                                                                                                                                      | Gardner, , AW, Montgomery, PS, Flinn, WR; Katzel, LI                                                                                                                                               | 2005 |
| Efficacy and safety of rilonacept (interleukin-1 Trap) in patients with cryopyrin-associated periodic syndromes: results from two sequential placebo-controlled studies                                                                                     | Hoffman, , HM, Throne, ML, Amar, NJ, Sebai, M, Kivitz, AJ, Kavanaugh, A, Weinstein, SP, Belomestnov, P, Yancopoulos, GD, Stahl, N; Mellis, SJ                                                      | 2008 |
| Interferon-alpha treatment induces delayed CD4 proliferative responses to the hepatitis C virus nonstructural protein 3 regardless of the outcome of therapy                                                                                                | Zhang, , ZX, Milich, DR, Peterson, DL, Birkett, A, Schvarcz, R, Weiland, O; Sällberg, M                                                                                                            | 1997 |
| Lack of cardioprotective efficacy of allopurinol in coronary artery surgery                                                                                                                                                                                 | Taggart, , DP, Young, V, Hooper, J, Kemp, M, Walesby, R, Magee, P; Wright, JE                                                                                                                      | 1994 |
| Protocol for a randomised, placebo-controlled pilot study for assessing feasibility and efficacy of faecal microbiota transplantation in a paediatric ulcerative colitis population: pediFETCh trial                                                        | Pai, , N; Popov, J                                                                                                                                                                                 | 2017 |
| The role of IL-1 in postprandial fatigue                                                                                                                                                                                                                    | Lehrskov, , LL, Dorph, E, Widmer, AM, Hepprich, M, Siegenthaler, J, Timper, K; Donath, MY                                                                                                          | 2018 |
| The FOSmetpantotenate Replacement Therapy (FORT) Randomized, Double-Blind, Placebo-Controlled Pivotal Trial: study Design and Development Methodology of a Novel Primary Efficacy Outcome in Patients With Pantothenate Kinase-Associated Neurodegeneration | Klopstock, , T, Escolar, ML, Marshall, RD, Perez-Duenas, B, Tuller, S, Videnovic, A; Greblikas, F                                                                                                  | 2019 |
| Hydroxyethyl starch resuscitation downregulate pro-inflammatory cytokines in the early phase of severe acute pancreatitis: a retrospective study                                                                                                            | Chen, , Q-J, Yang, Z-Y, Wang, C-Y, Dong, L-M, Zhang, Y-S, Xie, C, Chen, C-Z, Zhu, S-K, Yang, H-J, Wu, H-S; Yang, C                                                                                 | 2016 |
| Surfactant Protein-D: a sensitive predictor for efficiency of preoperative pulmonary rehabilitation                                                                                                                                                         | Huang, , J, Lai, Y, Gao, K, Wang, Y, Du, H, Su, J, Che, G; Zhou, X                                                                                                                                 | 2017 |
| Rational molecular assessment and innovative drug selection (RAIDs): exome data from cervical cancer                                                                                                                                                        | Scholl, , S, Kamal, M, Berns, E, Balint, B, Kereszt, A, De Koning, L, Jeannot, E, Lusciprondof, W, Sibut, V, Hupe, P, Kenter, G, Samuels, S, Jordanova, K, Blanchet, S, Lafanachere, L; Billaud, M | 2016 |
| Effects of rosiglitazone vs metformin on circulating osteoclast and osteogenic precursor cells in postmenopausal women with type 2 diabetes mellitus                                                                                                        | Rubin, , MR, Manavalan, JS, Agarwal, S, McMahon, DJ, Nino, A, Fitzpatrick, LA; Bilezikian, JP                                                                                                      | 2014 |
| Weight loss and improvements in fatigue in systemic lupus erythematosus: a controlled trial of a low glycaemic index diet versus a calorie restricted diet in patients treated with corticosteroids                                                         | Davies, , RJ, Lomer, MC, Yeo, SI, Avloniti, K, Sangle, SR; D'Cruz, DP                                                                                                                              | 2012 |
| Progesterone Treatment of Blunt Traumatic Brain Injury                                                                                                                                                                                                      | NCT00048646                                                                                                                                                                                        | 2002 |
| Comparative effects of hemodilutional anemia and transfusion during cardiopulmonary bypass on acute kidney injury: a prospective randomized study                                                                                                           | Aritürk, , C, Ozgen, ZS, Kilercik, M, Ulugöl, H, Ökten, EM, Aksu, U, Karabulut, H; Toraman, F                                                                                                      | 2015 |
| Synbiotic therapy (Bifidobacterium longum/Synergy 1) initiates resolution of inflammation in patients with active ulcerative colitis: a randomised controlled pilot trial                                                                                   | Furrie, , E, Macfarlane, S, Kennedy, A, Cummings, JH, Walsh, SV, O'neil, DA; Macfarlane, GT                                                                                                        | 2005 |
| Imiquimod applied topically: a novel immune response modifier                                                                                                                                                                                               | Tyring, S                                                                                                                                                                                          | 2001 |
| Effect of non-surgical periodontal therapy on superoxide dismutase levels in gingival tissues of chronic periodontitis patients: a clinical and spectrophotometric analysis                                                                                 | Sukhtankar, , L, Kulloli, A, Kathariya, R; Shetty, S                                                                                                                                               | 2013 |
| Prehabilitation in Colorectal Cancer                                                                                                                                                                                                                        | NCT03096951                                                                                                                                                                                        | 2017 |
| Targets of therapy of patients with congestive heart failure caused by ischemic heart disease and diabetes                                                                                                                                                  | Megreladze, , II, Gongadze, NV, Kezeli, TD, Kakabadze, KS, Mirziashvili, MG, Chapichadze, ZV; Sukoyan, GV                                                                                          | 2013 |
| Influence of Roux-en-Y Gastric Bypass on the Hepatocellular Function and Bile Flow of Obese Patients Assessed by Scintigraphy with DISIDA                                                                                                                   | Salgado Júnior, , W, Donadelli, CA, Dos Santos, JS; Nonino, CB                                                                                                                                     | 2016 |
| Influence of food on the oral bioavailability of rupatadine tablets in healthy volunteers: a single-dose, randomized, open-label, two-way crossover study                                                                                                   | Solans, , A, Carbó, ML, Peña, J, Nadal, T, Izquierdo, I; Merlos, M                                                                                                                                 | 2007 |
| Rheumatoid arthritis secondary non-responders to TNF can attain an efficacious and safe response by switching to certolizumab pegol: a phase IV, randomised, multicentre, double-blind, 12-week study, followed by a 12-week open-label phase               | Schiff, , MH, von Kempis, J, Goldblum, R, Tesser, JR; Mueller, RB                                                                                                                                  | 2014 |
| Pretreatment intracerebral and peripheral blood immune responses in vietnamese adults with tuberculous meningitis: diagnostic value and relationship to disease severity and outcome                                                                        | Simmons, , CP, Thwaites, GE, Quyen, NTH, Torok, E, Hoang, DM, Chau, TTH, Mai, PP, Lan, NTN, Dung, NH, Quy, HT, Bang, ND, Hien, TT; Farrar, J                                                       | 2006 |

|                                                                                                                                                                                                                                                                               |                                                                                                                                                                                                                                                                              |      |
|-------------------------------------------------------------------------------------------------------------------------------------------------------------------------------------------------------------------------------------------------------------------------------|------------------------------------------------------------------------------------------------------------------------------------------------------------------------------------------------------------------------------------------------------------------------------|------|
| Remote Ischaemic Preconditioning of Human Myocardium (RIPE): study protocol for a double-blinded randomised controlled trial                                                                                                                                                  | Deja, , MA, Wiaderkiewicz, R, Czekaj, P, Czech, E, Malinowski, M, Machej, L, Węglarzy, A, Kowalówka, A, Piekarska, M, Szurlej, B; Latusek, T                                                                                                                                 | 2018 |
| Expanded allogeneic adipose-derived stem cells (eASCs) for the treatment of complex perianal fistula in Crohn's disease: results from a multicenter phase I/IIa clinical trial                                                                                                | De La Portilla, , F, Alba, F, Garcia-Olmo, D, Herrerias, JM, Gonzalez, FX; Galindo, A                                                                                                                                                                                        | 2013 |
| Docosahexaenoic Acid and Periodontitis in Adults: a Randomized Controlled Trial                                                                                                                                                                                               | Naqvi, , AZ, Hasturk, H, Mu, L, Phillips, RS, Davis, RB, Halem, S, Campos, H, Goodson, JM, Van Dyke, TE; Mukamal, KJ                                                                                                                                                         | 2014 |
| Efficacy and tolerability of combination therapy with valsartan plus hydrochlorothiazide compared with amlodipine monotherapy in hypertensive patients with other cardiovascular risk factors: the VAST study                                                                 | Ruilope, , LM, Malacco, E, Khder, Y, Kandra, A, Bönner, G; Heintz, D                                                                                                                                                                                                         | 2005 |
| Colonic acetate infusions promote fat oxidation and improve metabolic parameters in overweight males                                                                                                                                                                          | Canfora, , EE, Van Der Beek, CM, Lenaerts, K, Troost, FJ, Holst, JJ, Masclee, AAM, Dejong, CHC; Blaak, EE                                                                                                                                                                    | 2014 |
| Interleukin-1 blockade with anakinra to prevent adverse cardiac remodeling after acute myocardial infarction (Virginia Commonwealth University Anakinra Remodeling Trial Pilot study)                                                                                         | Abbate, , A, Kontos, MC, Grizzard, JD, Biondi-Zoccai, GG, Van Tassell, BW, Robati, R, Roach, LM, Arena, RA, Roberts, CS, Varma, A, Gelwix, CC, Salloum, FN, Hastillo, A, Dinarello, CA; Vetrovec, GW                                                                         | 2010 |
| Asthma Clinical Research Network (ACRN)                                                                                                                                                                                                                                       | NCT00000577                                                                                                                                                                                                                                                                  | 1999 |
| THE LASER-AMI STUDY - Excimer Laser Versus Manual Thrombus Aspiration in Acute Myocardial Infarction                                                                                                                                                                          | NCT01826006                                                                                                                                                                                                                                                                  | 2013 |
| Long-term safety of anti-TNF agents on the liver of patients with spondyloarthritis and potential occult hepatitis B viral infection: an observational multicentre study                                                                                                      | Giannitti, , C, Lopalco, G, Vitale, A, Rigante, D, Anelli, MG, Fabbroni, M, Manganelli, S, Galeazzi, M, Frediani, B, Barone, M, Lapadula, G, Iannone, F; Cantarini, L                                                                                                        | 2017 |
| Comparative effects of 10-mg versus 80-mg Atorvastatin on high-sensitivity C-reactive protein in patients with stable coronary artery disease: results of the CAP (Comparative Atorvastatin Pleiotropic effects) study                                                        | Bonnet, , J, McPherson, R, Tedgui, A, Simoneau, D, Nozza, A, Martineau, P; Davignon, J                                                                                                                                                                                       | 2008 |
| Acetyl-coenzyme A carboxylase inhibition reduces de novo lipogenesis in overweight male subjects: a randomized, double-blind, crossover study                                                                                                                                 | Stiede, , K, Miao, W, Blanchette, HS, Beysen, C, Harriman, G, Harwood, HJ, Kelley, H, Kapeller, R, Schmalbach, T; Westlin, WF                                                                                                                                                | 2017 |
| The 'Switch' study protocol: a randomised-controlled trial of switching to an alternative tumour-necrosis factor (TNF)-inhibitor drug or abatacept or rituximab in patients with rheumatoid arthritis who have failed an initial TNF-inhibitor drug                           | Navarro Coy, , NC, Brown, S, Bosworth, A, Davies, CT, Emery, P, Everett, CC, Fernandez, C, Gray, JC, Hartley, S, Hulme, C, Keenan, AM, McCabe, C, Redmond, A, Reynolds, C, Scott, D, Sharples, LD, Pavitt, S; Buch, MH                                                       | 2014 |
| Myocardial injury following coronary artery surgery versus angioplasty (MICASA): a randomised trial using biochemical markers and cardiac magnetic resonance imaging                                                                                                          | van Gaal, , WJ, Arnold, JR, Testa, L, Karamitsos, T, Lim, CC, Ponnuthurai, FA, Petersen, S, Francis, JM, Selvanayagam, J, Sayeed, R, West, N, Westaby, S, Neubauer, S; Banning, AP                                                                                           | 2011 |
| Effectiveness of Whole-body Hyperthermia by Mild Water-filtered Infrared A Radiation in Psoriatic Arthritis: a Controlled, Randomised, Prospective Trial                                                                                                                      | Lange, , U, Schwab, F, Muller-Ladner, U; Dischereit, G                                                                                                                                                                                                                       | 2014 |
| The clinical response and systemic effects of non-surgical periodontal therapy in end-stage renal disease patients: a 6-month randomized controlled clinical trial                                                                                                            | Fang, , F, Wu, B, Qu, Q, Gao, J, Yan, W, Huang, X, Ma, D, Yue, J, Chen, T, Liu, F; Liu, Y                                                                                                                                                                                    | 2015 |
| Low-dose atrial natriuretic peptide for chronic kidney disease in coronary surgery                                                                                                                                                                                            | Yoshitake, , I, Sezai, A, Hata, M, Niino, T, Unosawa, S, Wakui, S; Shiono, M                                                                                                                                                                                                 | 2011 |
| Calprotectin levels in gingival crevicular fluid predict disease activity in patients treated for generalized aggressive periodontitis                                                                                                                                        | Kaner, , D, Bernimoulin, JP, Dietrich, T, Kleber, BM; Friedmann, A                                                                                                                                                                                                           | 2011 |
| Hyper osmolality does not modulate natriuretic peptide concentration in patients after coronary artery surgery                                                                                                                                                                | Honkonen, , EL, Järvelä, K, Huhtala, H, Holm, P; Lindgren, L                                                                                                                                                                                                                 | 2009 |
| Membrane versus centrifuge-based therapeutic plasma exchange: a randomized prospective crossover study                                                                                                                                                                        | Hafer, , C, Golla, P, Gericke, M, Eden, G, Beutel, G, Schmidt, JJ, Schmidt, BM, De Reys, S; Kielstein, JT                                                                                                                                                                    | 2016 |
| IL-1 receptor antagonist reduces endotoxin-induced airway inflammation in healthy volunteers                                                                                                                                                                                  | Hernandez, , ML, Mills, K, Almond, M, Todoric, K, Aleman, MM, Zhang, H, Zhou, H; Peden, DB                                                                                                                                                                                   | 2015 |
| Late post-conditioning with sevoflurane after cardiac surgery - Are surrogate markers associated with clinical outcome?                                                                                                                                                       | Bonvini, , JM, Beck-Schimmer, B, Kuhn, SJ, Graber, SM, Neff, TA; Schlapfer, M                                                                                                                                                                                                | 2015 |
| Effects of inhaled tiotropium plus transdermal tulobuterol versus tiotropium alone on impulse oscillation system (IOS)-assessed measures of peripheral airway resistance and reactance, lung function and quality of life in patients with COPD: a randomized crossover study | Abe, , T, Setoguchi, Y, Kono, Y, Togashi, Y, Sugiyama, S, Tanakadate, M, Soeda, S, Nakai, M, Sugiyama, N, Fujiwara, A, Yamaguchi, K, Yamaguchi, A; Kurita, N                                                                                                                 | 2011 |
| Incidence and risk factors for serious infection in patients with rheumatoid arthritis treated with tumor necrosis factor inhibitors: a report from the registry of Japanese rheumatoid arthritis patients for longterm safety                                                | Komano, , Y, Tanaka, M, Nanki, T, Koike, R, Sakai, R, Kameda, H, Nakajima, A, Saito, K, Takeno, M, Atsumi, T, Tohma, S, Ito, S, Tamura, N, Fujii, T, Sawada, T, Ida, H, Hashiramoto, A, Koike, T, Ishigatsubo, Y, Eguchi, K, Tanaka, Y, Takeuchi, T, Miyasaka, N; Harigai, M | 2011 |
| Efficacy of probiotic therapy on atopic dermatitis in children: a randomized, double-blind, placebo-controlled trial                                                                                                                                                          | Yang, , H-J, Min, TK, Lee, HW; Pyun, BY                                                                                                                                                                                                                                      | 2014 |
| Evaluation of sleep quality in patients with ankylosing spondylitis and efficacy of anti-TNF-alpha therapy on sleep problems: a polysomnographic study                                                                                                                        |                                                                                                                                                                                                                                                                              | 2018 |
| Comparison of laparoscopically assisted vaginal hysterectomy with abdominal hysterectomy. Technique and results                                                                                                                                                               | Kunz, , G, Plath, T; Leyendecker, G                                                                                                                                                                                                                                          | 1996 |
| Corticosteroids and Anti TNF in Methotrexate Inadequate Responder Rheumatoid Arthritis Patient                                                                                                                                                                                | NCT01724268                                                                                                                                                                                                                                                                  | 2012 |
| Infliximab Therapy in Patients With Refractory Polymyalgia Rheumatica                                                                                                                                                                                                         | NCT01423591                                                                                                                                                                                                                                                                  | 2011 |

|                                                                                                                                                                                                                                                                                       |                                                                                                                                                           |      |
|---------------------------------------------------------------------------------------------------------------------------------------------------------------------------------------------------------------------------------------------------------------------------------------|-----------------------------------------------------------------------------------------------------------------------------------------------------------|------|
| Aberrant expression and dysfunction of TLR2 and its soluble form in chronic HBV infection and its regulation by antiviral therapy                                                                                                                                                     | Huang, , Z, Ge, J, Pang, J, Liu, H, Chen, J, Liao, B, Huang, X, Zuo, D, Sun, J, Lu, M, Zhang, X; Hou, J                                                   | 2015 |
| Prognosis and risk factors in patients with asymptomatic aortic stenosis and their modulation by atorvastatin (20 mg)                                                                                                                                                                 | Dichtl, , W, Alber, HF, Feuchtnr, GM, Hintringer, F, Reinthaler, M, Bartel, T, Süßenbacher, A, Grander, W, Ulmer, H, Pachinger, O; Müller, S              | 2008 |
| The effects of pentoxifylline administration on NFkB P50 transcription factor expression                                                                                                                                                                                              | Shamsara, , J, Behravan, J, Falsoleiman, H, Mohammadpour, AH; Ramezani, M                                                                                 | 2012 |
| Chinese herbal medicine (Ma Zi Ren Wan) for functional constipation: study protocol for a prospective, double-blinded, double-dummy, randomized controlled trial                                                                                                                      | Zhong, , LLD, Cheng, CW, Chan, Y, Chan, KH, Lam, TW, Chen, XR, Wong, CT, Wu, JCY; Bian, ZX                                                                | 2013 |
| Cost-Effectiveness of TNF-Blocker Injection Spacing for Patients with Established Rheumatoid Arthritis in Remission: an Economic Evaluation from the Spacing of TNF-Blocker Injections in Rheumatoid Arthritis Trial                                                                  | Vanier, , A, Mariette, X, Tubach, F; Fautrel, B                                                                                                           | 2017 |
| Human anti-tumor necrosis factor monoclonal antibody (adalimumab) in Crohn's disease: the CLASSIC-I trial                                                                                                                                                                             | Hanauer, , SB, Sandborn, WJ, Rutgeerts, P, Fedorak, RN, Lukas, M, MacIntosh, D, Panaccione, R, Wolf, D; Pollack, P                                        | 2006 |
| Predicting clinical outcomes in cancer patients based on a novel computational biology method of mapping the cancer mutanome                                                                                                                                                          | Drusbosky, , L, Martuscello, R, Abbasi, T, Vali, S; Cogle, CR                                                                                             | 2016 |
| Intensive statin therapy stabilizes C-reactive protein, but not chemokine in stable coronary artery disease treated with an everolimus-eluting stent                                                                                                                                  | Sukegawa, , H, Maekawa, Y, Yuasa, S, Anzai, A, Kodaira, M, Takei, M, Sano, F, Ueda, I, Kawakami, T, Hayashida, K, Kohno, T, Kohsaka, S, Abe, T; Fukuda, K | 2016 |
| Acute normovolaemic haemodilution with crystalloids in coronary artery bypass graft surgery: a preliminary survey of haemostatic markers                                                                                                                                              | Jalali, , A, Naseri, MH, Chalian, M; Dolatabadi, HL                                                                                                       | 2008 |
| A randomised phase II study of interleukin-1 receptor antagonist in acute stroke patients                                                                                                                                                                                             | Emsley, , HC, Smith, CJ, Georgiou, RF, Vail, A, Hopkins, SJ, Rothwell, NJ; Tyrrell, PJ                                                                    | 2005 |
| Systemic Probiotics in the Periodontal Treatment                                                                                                                                                                                                                                      | NCT03733379                                                                                                                                               | 2018 |
| Mid-term echocardiographic follow up of left ventricular function with permanent right ventricular pacing in pediatric patients with and without structural heart disease                                                                                                             | Shalganov, , TN, Paprika, D, Vatasescu, R, Kardos, A, Mihalcz, A, Kornyei, L, Szatmari, A; Szili-Torok, T                                                 | 2007 |
| Micronized purified flavonoid fraction in pretreating CABG patients                                                                                                                                                                                                                   | Sirlak, , M, Akar, AR, Eryilmaz, S, Cetinkanat, EK, Ozcinar, E, Kaya, B, Elhan, AH; Ozyurda, U                                                            | 2010 |
| Successful lower extremity angioplasty improves brachial artery flow-mediated dilation in patients with peripheral arterial disease                                                                                                                                                   | Husmann, , M, Dörrfler-Melly, J, Kalka, C, Diehm, N, Baumgartner, I; Silvestro, A                                                                         | 2008 |
| Interferon-alpha treatment induces delayed CD4 proliferative responses to the hepatitis C virus nonstructural protein 3 regardless of the outcome of therapy                                                                                                                          | Zhang, , Z-X, Milich, DR, Peterson, DL, Bitkett, A, Schwarcz, R; Weiland, O                                                                               | 1997 |
| Efficacy of warm gutta-percha root canal filling in the treatment of dental pulpal and periapical diseases                                                                                                                                                                            | Wang, , J, Du, Y, Deng, J, Wang, X; He, J                                                                                                                 | 2019 |
| The effect of Gluten Free Diet on Ulcerative Colitis                                                                                                                                                                                                                                  | IRCT2015062113678N4                                                                                                                                       | 2016 |
| The impact of two Models of Aerobic Training on Cognitive View, Body Composition and Metabolism of Young People with Obesity                                                                                                                                                          | RBR-7pdc8y                                                                                                                                                | 2018 |
| A Phase IIb, Placebo-Controlled, Study to Optimize Diamyd® Therapy Administered into Lymph Nodes Combined with Vitamin D oral drops to Investigate the Impact on the Progression of Type 1 diabetes                                                                                   | EUCTR2017-001861-25-NL                                                                                                                                    | 2018 |
| A RANDOMIZED, DOUBLE-BLIND, PARALLEL GROUP STUDY OF THE SAFETY AND THE EFFECT ON CLINICAL OUTCOME OF TOCILIZUMAB SC VERSUS PLACEBO SC IN COMBINATION WITH TRADITIONAL DISEASE MODIFYING ANTI-RHEUMATIC DRUGS (DMARDS) IN PATIENTS WITH MODERATE TO SEVERE ACTIVE RHEUMATOID ARTHRITIS | PER-028-11                                                                                                                                                | 2011 |
| Measures of inflammation in low back pain and anti-TNFa (anti-inflammation treatment) for the treatment of deemed low back pain - an explorative study                                                                                                                                | EUCTR2014-005722-35-DK                                                                                                                                    | 2015 |
| study, utilizing Zinc as enhancer of immune recovery and immune reconstitution in auto-transplant for multiple myeloma                                                                                                                                                                | EUCTR2014-004499-47-IT                                                                                                                                    | 2015 |
| Albumin administration in the prevention of hepatorenal syndrome and death in patients with cirrhosis, bacterial infections other than spontaneous bacterial peritonitis and high risk of hospital mortality                                                                          | EUCTR2013-002416-27-AT                                                                                                                                    | 2014 |
| Effects of physical activity and anti-TNF-alpha disease control on lipid profile of rheumatoid arthritis patients                                                                                                                                                                     | Cacciapaglia, , F, Iervolino, S, Anelli, MG, Mazzotta, D, Zincarelli, C, Pappone, N, Iannone, F; Lapadula, G                                              | 2015 |
| A randomized, double-blind, placebo controlled, multicenter Phase II study to assess the efficacy and safety of Sorafenib added to standard treatment with Topotecan in patients with platinum-resistant recurrent ovarian cancer - TRIAS 2009                                        | EUCTR2009-011922-33-DE                                                                                                                                    | 2009 |
| Curcumin and hypertriglyceridemia                                                                                                                                                                                                                                                     | IRCT2015071314521N4                                                                                                                                       | 2017 |
| The cost-effectiveness of abatacept, rituximab or anti-TNF alpha for patients with rheumatoid arthritis. - Dutch Rheumatoid Arthritis Monitoring (DREAM) Targetted Immune Modulator Evaluation (TIME)                                                                                 | EUCTR2008-005450-20-BE                                                                                                                                    | 2009 |
| The study to confirm the effect of a food containing lactic acid bacteria on oral health : a randomized, double-blind, placebo controlled trial                                                                                                                                       | JPRN-UMIN000028407                                                                                                                                        | 2018 |
| A clinical study to evaluate the efficacy and safety of Morinidazole and Sodium Chloride Injection in the treatment of Acute biliary pancreatitis with infection                                                                                                                      | ChiCTR1900020552                                                                                                                                          | 2019 |
| Treatment of chronic periodontitis decreases serum prohepcidin levels in patients with chronic kidney disease                                                                                                                                                                         | Vilela, , EM, Bastos, JA, Fernandes, N, Ferreira, AP, Chaoubah, A; Bastos, MG                                                                             | 2011 |

|                                                                                                                                                                                                                                                                                                                                       |                                                                                                                                                                    |      |
|---------------------------------------------------------------------------------------------------------------------------------------------------------------------------------------------------------------------------------------------------------------------------------------------------------------------------------------|--------------------------------------------------------------------------------------------------------------------------------------------------------------------|------|
| Maternal, placental and cord blood cytokines and the risk of adverse birth outcomes among pregnant women infected with Schistosoma japonicum in the Philippines                                                                                                                                                                       | Abioye, , AI, McDonald, EA, Park, S, Joshi, A, Kurtis, JD, Wu, H, Pond-Tor, S, Sharma, S, Ernerudh, J, Baltazar, P, Acosta, LP, Olveda, RM, Tallo, V; Friedman, JF | 2019 |
| Effect of sesamin supplementation in rheumatoid arthritis women                                                                                                                                                                                                                                                                       | IRCT2013111715424N1                                                                                                                                                | 2014 |
| A PHASE II RANDOMIZED, PLACEBO-CONTROLLED CLINICAL TRIAL TO STUDY THE SAFETY AND IMMUNOGENICITY OF V212 IN ADULT PATIENTS WITH AUTOIMMUNE DISEASE                                                                                                                                                                                     | PER-031-12                                                                                                                                                         | 2012 |
| Study conducted on humans in Europe to test the importance of a small molecule normally produced by the body, called Interleukin 2 (IL-2) to treat a specific type of diabetes (called type 1 diabetes)                                                                                                                               | EUCTR2014-002522-12-NL                                                                                                                                             | 2014 |
| Effects of Cichorium Intybus L. Leaf Extract on improvement of the clinical status of patients with periodontal                                                                                                                                                                                                                       | IRCT2015112825274N1                                                                                                                                                | 2016 |
| A MULTICENTER, RANDOMIZED, DOUBLE-BLIND, PLACEBO-CONTROLLED, PARALLEL-GROUP STUDY TO EVALUATE THE EFFICACY AND SAFETY OF JTE-051 ADMINISTERED FOR 12 WEEKS TO SUBJECTS WITH ACTIVE RHEUMATOID ARTHRITIS (MOVE-RA)                                                                                                                     | PER-046-15                                                                                                                                                         | 2015 |
| Extension study to evaluate the long term efficacy, safety and tolerability of secukinumab in patients with rheumatoid arthritis                                                                                                                                                                                                      | EUCTR2013-000944-25-HU                                                                                                                                             | 2013 |
| Immune reconstitution in severely immunosuppressed antiretroviral-naive HIV-1 infected patients (<100 CD4+ T cells/?L) taking antiretroviral regimens based on dolutegravir or ritonavir-boosted darunavir (the AdvanZ-4 Trial)                                                                                                       | EUCTR2014-002281-70-ES                                                                                                                                             | 2014 |
| Is peritoneal inflammation during peritoneal dialysis inhibited by drugs that block effects of substance P?                                                                                                                                                                                                                           | EUCTR2012-005063-28-SE                                                                                                                                             | 2012 |
| Clinical phase IV study assessing the efficacy and safety of the medicinal product Gropirinosin in treatment of recurrent airway inflammation in children with impaired cellular immunity and diagnosed or undiagnosed allergic disease                                                                                               | EUCTR2013-003303-18-PL                                                                                                                                             | 2014 |
| Treating Idiopathic Inflammatory Myopathies Related Reduced Bone Mineral Density With Denosumab or Zoledronic Acid                                                                                                                                                                                                                    | NCT04034199                                                                                                                                                        | 2019 |
| Randomized Study of Nivolumab Combined With Ipilimumab Versus Pemetrexed and Cisplatin or Carboplatin as First Line Therapy in Unresectable Pleural Mesothelioma Patients                                                                                                                                                             | EUCTR2016-001859-43-GR                                                                                                                                             | 2016 |
| The effect of fish oil on red blood cell function and walking distance in patients with arterial occlusion in the legs                                                                                                                                                                                                                | EUCTR2013-004342-42-NL                                                                                                                                             | 2014 |
| Biocompatibility of a new haemodialysis concentrate containing gluconic and citric acid (Honeydew) compared to acetic acid (SelectBagOne®) and citric acid (Honeycit)                                                                                                                                                                 | ISRCTN60694941                                                                                                                                                     | 2010 |
| Prevention of bone loss following spinal cord injury                                                                                                                                                                                                                                                                                  | ISRCTN46977778                                                                                                                                                     | 2004 |
| A PHASE III RANDOMIZED CLINICAL TRIAL OF PEMBROLIZUMAB (MK-3475) VERSUS PACLITAXEL, DOCETAXEL OR VINFLUNINE IN SUBJECTS WITH RECURRENT OR PROGRESSIVE METASTATIC UROTHELIAL CANCER                                                                                                                                                    | PER-074-14                                                                                                                                                         | 2015 |
| Controlled, international study conducted in several centres on the safety and therapeutic effect of a Hydroxylethyl-starch (HES) solution versus an electrolyte solution in patients undergoing elective abdominal surgery                                                                                                           | EUCTR2016-002162-30-NL                                                                                                                                             | 2017 |
| A Randomized, Open-Label, Phase 3 Study to Assess the Efficacy and Safety of KRN23 Versus Oral Phosphate and Active Vitamin D Treatment in Pediatric Patients with X-linked Hypophosphatemia (XLH)                                                                                                                                    | EUCTR2016-000600-29-IE                                                                                                                                             | 2016 |
| A phase II study of Erlotinib and Bevacizumab combination therapy for previously treated III B / IV Stage non-squamous non-small cell lung cancer: IMSLC-001                                                                                                                                                                          | JPRN-UMIN000011791                                                                                                                                                 | 2013 |
| Pragmatic, controlled, international study conducted in several centres on the safety and therapeutic effect of a Hydroxylethyl starch (HES) solution versus an electrolyte solution in trauma patients                                                                                                                               | EUCTR2016-002176-27-DE                                                                                                                                             | 2016 |
| Impact of resveratrol supplementation in treatment of periodontal patients with type 2 diabetes mellitus                                                                                                                                                                                                                              | IRCT2015012420765N1                                                                                                                                                | 2015 |
| This study is aimed at assessing the safety of SmofKabiven® (to be registered in India) in comparison to Kabiven (already marketed in India) in patients with gastrointestinal disorders requiring parenteral nutrition                                                                                                               | CTRI/2014/06/004672                                                                                                                                                | 2014 |
| A Randomised, Double-blind, Placebo-controlled, Parallel Group, Multicentre, Phase II Study to Assess The Efficacy of AZD9056 (single oral 400 mg dose) when Administered for 4 Weeks in Patients with Moderate to Severe COPD                                                                                                        | EUCTR2005-004110-32-SE                                                                                                                                             | 2005 |
| A Phase 2 study to investigate the safety and efficacy of ABBV-105 given alone or in combination with ABT-494 (Upadacitinib) in patients with active rheumatoid arthritis who have failed prior treatment with biologic therapy                                                                                                       | EUCTR2018-000666-10-HU                                                                                                                                             | 2018 |
| A Clinical Trial to Look at the Effects of the Drug Bempeidic Acid in Patients with Frequent Major Cardiovascular Events, or at High Risk of Cardiovascular Disease who Cannot be Treated with Statins. Patients to be randomly allocated to either placebo or investigational drug; assignment will be unknown to patient and doctor | EUCTR2016-003486-26-GB                                                                                                                                             | 2017 |
| DIFFERENTIATING THE MECHANISM OF ACTION OF ANTI TNF-alpha AGENTS - DATA Study                                                                                                                                                                                                                                                         | EUCTR2006-000363-28-GB                                                                                                                                             | 2006 |

|                                                                                                                                                                                                                                                                                            |                                                                                                                                                                                                    |      |
|--------------------------------------------------------------------------------------------------------------------------------------------------------------------------------------------------------------------------------------------------------------------------------------------|----------------------------------------------------------------------------------------------------------------------------------------------------------------------------------------------------|------|
| A study examining the effect of etanercept on inflammation in the brain                                                                                                                                                                                                                    | ISRCTN12472821                                                                                                                                                                                     | 2015 |
| Pain mechanisms and fatigue in rheumatoid arthritis (RA) and healthy volunteers. Can antirheumatic and biological therapy affect pain processing and fatigue in RA? - RA PAIN PROCESSING                                                                                                   | EUCTR2008-005212-40-SE                                                                                                                                                                             | 2008 |
| APRICOT - Anakinra for pustular psoriasis                                                                                                                                                                                                                                                  | ISRCTN13127147                                                                                                                                                                                     | 2016 |
| Pilot Trial to preserve residual insulin secretion in children and adolescents with recent onset Type 1 diabetes by using GAD-antigen (Diamyd) therapy in combination with Vitamin D and Ibuprofen                                                                                         | EUCTR2012-003251-11-SE                                                                                                                                                                             | 2012 |
| MULTICENTER STUDY WITH A 16-WEEK DOUBLE-BLIND, PLACEBO-CONTROLLED (DURING THE INITIAL 2 WEEKS) RANDOMIZED PERIOD, FOLLOWED BY A 24-WEEK OPEN LABEL EXTENSION TO ASSESS MAGNETIC RESONANCE IMAGE-VERIFIED EARLY RESPONSE TO CERTOLIZUMAB PEGOL IN SUBJECTS WITH ACTIVE RHEUMATOID ARTHRITIS | EUCTR2009-013758-33-SE                                                                                                                                                                             | 2010 |
| A study to investigate the effectiveness of mechanical traction in treating people with lower back pain and sciatica caused by a herniated lumbar disc                                                                                                                                     | ISRCTN15050704                                                                                                                                                                                     | 2018 |
| A three-part multicenter study, with a randomized, doubleblind, placebo controlled, withdrawal design in Part II to assess efficacy, safety, and tolerability of ACZ885 (antiinterleukin-1 $\beta$ monoclonal antibody) in patients with Muckle-Wells Syndrome                             | EUCTR2006-005455-15-DE                                                                                                                                                                             | 2007 |
| Efficacy and Safety of SAR339658 in Patients with Moderate to Severe Ulcerative Colitis                                                                                                                                                                                                    | EUCTR2012-002013-19-DE                                                                                                                                                                             | 2013 |
| Anakinra Treatment of Recurrent Idiopathic Pericarditis                                                                                                                                                                                                                                    | EUCTR2013-001849-13-IT                                                                                                                                                                             | 2016 |
| Clinical trial to study the effects and safety of stem cells, derived from fat tissue from human donors, administered intravenously to treat patients with severe bacterial pneumonia acquired outside the hospital, nursing home or long-term care facilities                             | EUCTR2015-002994-39-NL                                                                                                                                                                             | 2015 |
| The effects of a DPP4 inhibitor on endothelial function in diabetic patients with coronary artery disease                                                                                                                                                                                  | JPRN-UMIN000008806                                                                                                                                                                                 | 2012 |
| A Phase IIb, Placebo-Controlled, Study to Optimize Diamyd® Therapy Administered into Lymph Nodes Combined with Vitamin D oral drops to Investigate the Impact on the Progression of Type 1 diabetes                                                                                        | EUCTR2017-001861-25-SE                                                                                                                                                                             | 2017 |
| Cytokines and Inflammatory Marker during Therapy in Major Depression with Celecoxib - CITICOX                                                                                                                                                                                              | EUCTR2009-011990-34-DE                                                                                                                                                                             | 2010 |
| Comparing intervention levels for the support of blood pressure in extremely premature newborn babies                                                                                                                                                                                      | ISRCTN83507686                                                                                                                                                                                     | 2012 |
| Phase I with CIGB-814 in rheumatoid arthritis patients                                                                                                                                                                                                                                     | RPCEC00000238                                                                                                                                                                                      | 2017 |
| A 12-week, double-blind, randomized, parallel-group, placebo-controlled study of 4 doses of VX-509 in subjects with active rheumatoid arthritis                                                                                                                                            | EUCTR2009-017438-32-BE                                                                                                                                                                             | 2010 |
| The Randomized, Double-Blind, Placebo-Controlled Study of Efficacy and Safety of Propolis and N-Acetylcysteine Compared to Placebo in Adults in Acute Condition with Sputum Production                                                                                                     | ACTRN12617000344392                                                                                                                                                                                | 2017 |
| Impact of probiotic supplementation in treatment of periodontal patients with type 2 diabetes mellitus                                                                                                                                                                                     | IRCT2016110430694N1                                                                                                                                                                                | 2017 |
| A study examining the effect of etanercept (Enbrel) on inflammation in the brain                                                                                                                                                                                                           | EUCTR2015-002145-63-GB                                                                                                                                                                             | 2016 |
| Comparison of salivary IL-1 beta in moderate to severe chronic generalized periodontitis among healthy subjects and patients with type 2 diabetes                                                                                                                                          | IRCT2014110916246N2                                                                                                                                                                                | 2014 |
| A prospective, monocentric clinical trial with adalimumab for topical treatment of chronic wounds                                                                                                                                                                                          | EUCTR2009-015749-22-DE                                                                                                                                                                             | 2010 |
| Cardiomyocyte apoptosis and ischemic preconditioning in open heart operations                                                                                                                                                                                                              | Wu, , ZK, Laurikka, J, Saraste, A, Kytö, V, Pehkonen, EJ, Savunen, T; Tarkka, MR                                                                                                                   | 2003 |
| The effect of inhaled corticosteroids on bronchoalveolar lavage cells and IL-8 levels in stable COPD patients                                                                                                                                                                              | Ozol, , D, Aysan, T, Solak, ZA, Mogulkoc, N, Veral, A; Sebik, F                                                                                                                                    | 2005 |
| Fluoxetine for Maintenance of Remission and to Improve Quality of Life in Patients with Crohn's Disease: a Pilot Randomized Placebo-Controlled Trial                                                                                                                                       | Mikocka-Walus, , A, Hughes, PA, Bampton, P, Gordon, A, Campaniello, MA, Mavrangelos, C, Stewart, BJ, Esterman, A; Andrews, JM                                                                      | 2017 |
| A randomised controlled trial of two supervised exercise regimens and their impact on inflammatory burden in patients with intermittent claudication                                                                                                                                       | Delaney, , CL; Spark, JI                                                                                                                                                                           | 2016 |
| The Role of Biomarkers and Genetics in Peripheral Arterial Disease                                                                                                                                                                                                                         | McDermott, , MM; Lloyd-Jones, DM                                                                                                                                                                   | 2009 |
| Antimicrobial photodynamic therapy combined with periodontal treatment for metabolic control in patients with type 2 diabetes mellitus: study protocol for a randomized controlled trial                                                                                                   | Evangelista, , E, Franca, CM, Veni, P, de Oliveira Silva, T, Goncalves, RM, de Carvalho, FV, Deana, MA, Fernandes, KP, Mesquita-Ferrari, RA, Camacho, CP, Bussadori, KS, Alvarenga, HL; Prates, AR | 2015 |
| Effects of sitagliptin therapy on markers of low-grade inflammation and cell adhesion molecules in patients with type 2 diabetes                                                                                                                                                           | Tremblay, , AJ, Lamarche, B, Deacon, CF, Weisnagel, SJ; Couture, P                                                                                                                                 | 2014 |
| Modifying immune response and outcome in ALS (MIROCALS): a novel trial design to test the efficacy and safety of low dose interleukin-2                                                                                                                                                    | Leigh, , PN; Bensimon, G                                                                                                                                                                           | 2016 |
| Different effects of perindopril and enalapril on monocyte cytokine release in coronary artery disease patients with normal blood pressure                                                                                                                                                 | Krysiak, , R; Okopień, B                                                                                                                                                                           | 2012 |

|                                                                                                                                                                                                                                                                              |                                                                                                                                                                                                                                                |      |
|------------------------------------------------------------------------------------------------------------------------------------------------------------------------------------------------------------------------------------------------------------------------------|------------------------------------------------------------------------------------------------------------------------------------------------------------------------------------------------------------------------------------------------|------|
| Host-directed therapies for multidrug resistant tuberculosis                                                                                                                                                                                                                 | Zumla, , A; Maeurer, M                                                                                                                                                                                                                         | 2016 |
| Comparison between subcutaneous and intravenous interleukin-2 treatment in HIV disease                                                                                                                                                                                       | Witzke, , O, Winterhagen, T, Reinhardt, W, Heemann, U, Grosse-Wilde, H, Kreuzfelder, E, Roggendorf, M; Philipp, T                                                                                                                              | 1998 |
| Effect of long-term, low-dose clarithromycin on T helper 2 cytokines, eosinophilic cationic protein and the 'regulated on activation, normal T cell expressed and secreted' chemokine in the nasal secretions of patients with nasal polyposis                               | Peric, , A, Vojvodic, D; Matkovic-Jozin, S                                                                                                                                                                                                     | 2012 |
| Effect of alpha-lipoic acid and vitamin E supplementation on oxidative stress, inflammation, and malnutrition in hemodialysis patients                                                                                                                                       | Ahmadi, , A, Mazooji, N, Roozbeh, J, Mazloom, Z; Hasanzade, J                                                                                                                                                                                  | 2013 |
| Clinical outcome and IL-17, IL-23, IL-27 and FOXP3 expression in peripheral blood mononuclear cells of pollen-allergic children during sublingual immunotherapy                                                                                                              | Nieminen, , K, Valovirta, E; Savolainen, J                                                                                                                                                                                                     | 2010 |
| Clinical improvement and immunohistochemical findings in severe atopic dermatitis treated with interferon gamma                                                                                                                                                              | Jang, , IG, Yang, JK, Lee, HJ, Yi, JY, Kim, HO, Kim, CW; Kim, TY                                                                                                                                                                               | 2000 |
| Effect of hydroxymethylglutaryl-CoA reductase inhibitors on low-density lipoprotein cholesterol, interleukin-6, and high-sensitivity C-reactive protein in end-stage renal disease                                                                                           | Solilemani, , A, Nikoucinjad, H, Tabatabaizade, M, Mianehsaz, E; Tamadon, M                                                                                                                                                                    | 2011 |
| The combination of the selective cyclooxygenase-2 inhibitor celecoxib with weekly paclitaxel is a safe and active second-line therapy for non-small cell lung cancer: a phase II study with biological correlates                                                            | Gasparini, , G, Meo, S, Comella, G, Stani, SC, Mariani, L, Gamucci, T, Avallone, A, Lo Vullo, S, Mansueto, G, Bonginelli, P, Gattuso, D; Gion, M                                                                                               | 2005 |
| Impact of sodium nitrate on measures of vascular function and biomarkers of inflammation in patients with peripheral artery disease: a preliminary assessment                                                                                                                | Norton, , SL, Ueda, K, Ganger IV, CT, Treichler, DP; Casey, DP                                                                                                                                                                                 | 2016 |
| Thermotherapy reduces blood pressure and circulating endothelin-1 concentration and enhances leg blood flow in patients with symptomatic peripheral artery disease                                                                                                           | Neff, , D, Kuhlenthalter, AM, Lin, C, Wong, BJ, Motaganahalli, RL; Roseguini, BT                                                                                                                                                               | 2016 |
| Adipocytokines, C-reactive protein, and cardiovascular disease: a population-based prospective study                                                                                                                                                                         | Seven, , E, Husemoen, LL, Sehested, TS, Ibsen, H, Wachtell, K, Linneberg, A; Jeppesen, JL                                                                                                                                                      | 2015 |
| Vaccination of women with metastatic breast cancer, using a costimulatory gene (CD80)-modified, HLA-A2-matched, allogeneic, breast cancer cell line: clinical and immunological results                                                                                      | Dols, , A, Smith, JW, Meijer, SL, Fox, BA, Hu, HM, Walker, E, Rosenheim, S, Moudgil, T, Doran, T, Wood, W, Seligman, M, Alvord, WG, Schoof, D; Urba, WJ                                                                                        | 2003 |
| Recombinant human interleukin-2, recombinant human interferon alfa-2a, or both in metastatic renal-cell carcinoma. Groupe Français d'Immunothérapie                                                                                                                          | Negrier, , S, Escudier, B, Lasset, C, Douillard, JY, Savary, J, Chevreau, C, Ravaud, A, Mercatello, A, Peny, J, Mousseau, M, Philip, T; Tursz, T                                                                                               | 1998 |
| Effect of extra virgin olive oil on biomarkers of inflammation in HIV-infected patients: a randomized, crossover, controlled clinical trial                                                                                                                                  | Dokmanovic, , SK, Kolovrat, K, Laskaj, R, Jukic, V, Vrkic, N; Begovac, J                                                                                                                                                                       | 2015 |
| The addition of vildagliptin to metformin prevents the elevation of interleukin 18 in patients with type 2 diabetes and coronary artery disease: a prospective, randomized, open-label study                                                                                 | Younis, , A, Eskenazi, D, Goldkorn, R, Leor, J, Naftali-Shani, N, Fisman, EZ, Tenenbaum, A, Goldenberg, I, Klempfner, R                                                                                                                        | 2017 |
| Lung cancer chemoprevention with celecoxib in former smokers                                                                                                                                                                                                                 | Mao, , JT, Roth, MD, Fishbein, MC, Aberle, DR, Zhang, ZF, Rao, JY, Tashkin, DP, Goodlick, L, Holmes, EC, Cameron, RB, Dubinett, SM, Elashoff, R, Szabo, E; Elashoff, D                                                                         | 2011 |
| Short-term effects of Mediterranean-type diet intervention on soluble cellular adhesion molecules in subjects with abdominal obesity                                                                                                                                         | Rallidis, , LS, Kolomvotsou, A, Lekakis, J, Farajian, P, Vamvakou, G, Dages, N, Zolindaki, M, Efsthathiou, S, Anastasiou-Nana, M; Zampelas, A                                                                                                  | 2017 |
| Impact of resistance training in chronic obstructive pulmonary disease patients during periods of acute exacerbation                                                                                                                                                         | Borges, , RC; Carvalho, CR                                                                                                                                                                                                                     | 2014 |
| A randomized controlled pilot trial of valacyclovir for attenuating inflammation and immune activation in HIV/herpes simplex virus 2-coinfected adults on suppressive antiretroviral therapy                                                                                 | Yi, , TJ, Walmsley, S, Szadkowski, L, Raboud, J, Rajwans, N, Shannon, B, Kumar, S, Kain, KC, Kaul, R; Tan, DH                                                                                                                                  | 2013 |
| Five years of Kawasaki disease in the Netherlands a national surveillance study                                                                                                                                                                                              | Tacke, , CE, Breunis, WB, Pereira, RR, Breur, JM, Kuipers, IM; Kuijpers, TW                                                                                                                                                                    | 2014 |
| The LITE study: rationale and protocol for a randomized controlled trial of light therapy for cancer-related fatigue in cancer survivors                                                                                                                                     | Johnson, , JA, Garland, SN, Carlson, LE, Savard, J, Simpson, JS, Ancoli-Israel, S; Campbell, TS                                                                                                                                                | 2016 |
| Convalescent plasma treatment reduced mortality in patients with severe pandemic influenza A (H1N1) 2009 virus infection                                                                                                                                                     | Hung, , IFN, To, KKW, Lee, C-K, Lee, K-L, Chan, K, Yan, W-W, Liu, R, Watt, C-L, Chan, W-M, Lai, K-Y, Koo, C-K, Buckley, T, Chow, F-L, Wong, K-K, Chan, H-S, Ching, C-K, Tang, BSF, Lau, CCY, Li, IWS, Liu, S-H, Chan, K-H, Lin, C-K; Yuen, K-Y | 2011 |
| Epitope-Specific Immunotherapy Targeting CD4-Positive T Cells in Celiac Disease: safety, Pharmacokinetics, and Effects on Intestinal Histology and Plasma Cytokines with Escalating Dose Regimens of Nexvax2 in a Randomized, Double-Blind, Placebo-Controlled Phase 1 Study | Daveson, , AJM, Ee, HC, Andrews, JM, King, T, Goldstein, KE, Dzuris, JL, MacDougall, JA, Williams, LJ, Treohan, A, Cooreman, MP; Anderson, RP                                                                                                  | 2017 |
| The effect of an antenatal lifestyle intervention in overweight and obese women on circulating cardiometabolic and inflammatory biomarkers: secondary analyses from the LIMIT randomised trial                                                                               | Moran, , LJ, Fraser, LM, Sundernathan, T, Deussen, AR, Louise, J, Yelland, LN, Grivell, RM, Macpherson, A, Gillman, MW, Robinson, JS, Owens, JA; Dodd, JM                                                                                      | 2017 |
| Changes in Trypanosoma cruzi-specific immune responses after treatment: surrogate markers of treatment efficacy                                                                                                                                                              | Lauella, , SA, Mazliah, DP, Bertocchi, G, Alvarez, MG, Cooley, G, Viotti, R, Albareda, MC, Lococo, B, Postan, M, Armenti, A; Tarleton, RL                                                                                                      | 2009 |
| Simple advice on lifestyle habits and long-term changes in biomarkers of inflammation and vascular adhesion in healthy middle-aged men                                                                                                                                       | Sjogren, , P, Cederholm, T, Heimburger, M, Stenvinkel, P, Vedin, I, Palmblad, J; Hellenius, M-L                                                                                                                                                | 2010 |
| Effects of glucan treatment on the Th1/Th2 balance in patients with allergic rhinitis: a double-blind placebo-controlled study                                                                                                                                               | Kirmaz, , C, Bayrak, P, Yilmaz, O; Yuksel, H                                                                                                                                                                                                   | 2005 |
| Effects of surgical periodontal therapy on serum levels of TNF-alpha in patients with chronic periodontitis                                                                                                                                                                  | Yun, , F, Firkova, EI, Xun, H; Jun-Qi, L                                                                                                                                                                                                       | 2007 |



|                                                                                                                                                                                                                                           |                                                                                                                                                                                                  |      |
|-------------------------------------------------------------------------------------------------------------------------------------------------------------------------------------------------------------------------------------------|--------------------------------------------------------------------------------------------------------------------------------------------------------------------------------------------------|------|
| Phase II trial of everolimus in patients with previously treated recurrent or metastatic head and neck squamous cell carcinoma                                                                                                            | Geiger, , JL, Bauman, JE, Gibson, MK, Gooding, WE, Varadarajan, P, Kotsakis, A, Martin, D, Gutkind, JS, Hedberg, ML, Grandis, JR; Argiris, A                                                     | 2016 |
| Three months of moderate-intensity exercise reduced plasma 3-nitrotyrosine in rheumatoid arthritis patients                                                                                                                               | Wadley, , AJ, Veldhuijzen van Zanten, JJ, Stavropoulos-Kalinoglou, A, Metsios, GS, Smith, JP, Kitas, GD; Aldred, S                                                                               | 2014 |
| Double-blind randomized controlled clinical trial of the interleukin-6 receptor antagonist, tocilizumab, in European patients with rheumatoid arthritis who had an incomplete response to methotrexate                                    | Maini, , RN, Taylor, PC, Szechinski, J, Pavelka, K, Bröhl, J, Balint, G, Emery, P, Raemen, F, Petersen, J, Smolen, J, Thomson, D; Kishimoto, T                                                   | 2006 |
| Effects of aspirin on serum C-reactive protein and interleukin-6 levels in patients with type 2 diabetes without cardiovascular disease: a randomized placebo-controlled crossover trial                                                  | Hovens, , MM, Snoep, JD, Groeneveld, Y, Frölich, M, Tamsma, JT; Huisman, MV                                                                                                                      | 2008 |
| A randomized trial of sodium-restriction on kidney function, fluid volume and adipokines in CKD patients                                                                                                                                  | Campbell, , KL, Johnson, DW, Bauer, JD, Hawley, CM, Isbel, NM, Stowasser, M, Whitehead, JP, Dimeski, G; McMahon, E                                                                               | 2014 |
| Plasma fatty acid changes following consumption of dietary oils containing n-3, n-6, and n-9 fatty acids at different proportions: preliminary findings of the Canola Oil Multicenter Intervention Trial (COMIT)                          | Senanayake, , VK, Pu, S, Jenkins, DA, Lamarche, B, Kris-Etherton, PM, West, SG, Fleming, JA, Liu, X, McCrea, CE; Jones, PJ                                                                       | 2014 |
| Antipruritic Effect of Acupuncture in Patients with Atopic Dermatitis: feasibility Study Protocol for a Randomised, Sham-Controlled Trial                                                                                                 | Kim, , Y-K, Yeom, M, Kang, S, Park, H-J, Kim, K; Lee, H                                                                                                                                          | 2017 |
| Anti-IL-5 recombinant humanized monoclonal antibody (mepolizumab) for the treatment of atopic dermatitis                                                                                                                                  | Oldhoff, , JM, Darsow, U, Werfel, T, Katzer, K, Wulf, A, Laifaoui, J, Hijnen, DJ, Plötz, S, Knol, EF, Kapp, A, Bruijnzeel-Koomen, CA, Ring, J; de Bruin-Weller, MS                               | 2005 |
| Effect of nonsurgical periodontal therapy on serum and gingival crevicular fluid cytokine levels during pregnancy and postpartum                                                                                                          | Fiorini, , T, Susin, C, da Rocha, JM, Weidlich, P, Vianna, P, Moreira, CH, Bogo Chies, JA, Rösing, CK; Oppermann, RV                                                                             | 2013 |
| Low-Calorie Vegetarian Versus Mediterranean Diets for Reducing Body Weight and Improving Cardiovascular Risk Profile: CARDIVEG Study (Cardiovascular Prevention With Vegetarian Diet)                                                     | Sofi, , F, Dinu, M, Pagliai, G, Cesari, F, Gori, AM, Sereni, A, Becatti, M, Fiorillo, C, Marcucci, R; Casini, A                                                                                  | 2018 |
| Sirukumab in rheumatoid arthritis refractory to sulfasalazine or methotrexate: a randomized phase 3 safety and efficacy study in Japanese patients                                                                                        | Takeuchi, , T, Yamanaka, H, Harigai, M, Tamamura, R, Kato, Y, Ukyo, Y, Nakano, T, Hsu, B; Tanaka, Y                                                                                              | 2018 |
| A Phase IIb dose-ranging efficacy and safety study of tralokinumab in adult patients with moderate-to-severe atopic dermatitis (AD)                                                                                                       | Wollenberg, , A, Howell, MD, Guttman-Yassky, E, Silverberg, JJ, Birrell, C, Kell, C, Ranade, K, Dawson, M; Van Der Merwe, R                                                                      | 2018 |
| Efficacy and safety of lebrikizumab in patients with uncontrolled asthma (LAVOLTA I and LAVOLTA II): replicate, phase 3, randomised, double-blind, placebo-controlled trials                                                              | Hanania, , NA, Korenblat, P, Chapman, KR, Bateman, ED, Kopecky, P, Paggiaro, P, Yokoyama, A, Olsson, J, Gray, S, Holweg, CT, Eisner, M, Asare, C, Fischer, SK, Peng, K, Putnam, WS; Matthews, JG | 2016 |
| Protective HLA class I alleles are associated with reduced immune activation and fibrinolysis in individuals with primary HIV infection                                                                                                   | Hamlyn, , E, Hickling, S, Frater, J, Phillips, R, Babiker, A, McClure, M; Fidler, S                                                                                                              | 2010 |
| Efficacy of subgingivally applied minocycline in the treatment of chronic periodontitis                                                                                                                                                   | Lu, , HK; Chei, CJ                                                                                                                                                                               | 2005 |
| A genomic predictive signature for rigosertib in lower risk MDS derived by integrating clinical response, mechanism of action data and simulation                                                                                         | Fruchtman, , SM, Ali, AM, Petrone, ME, Zbyszewski, PS, Hoffmann, B, Vali, S, Singh, NK, Usmani, S, Grover, H, Abbasi, T; Raza, A                                                                 | 2016 |
| Qigong/Tai Chi Easy for fatigue in breast cancer survivors: rationale and design of a randomized clinical trial                                                                                                                           | Larkey, , L, Huberty, J, Pedersen, M; Weihs, K                                                                                                                                                   | 2016 |
| Adding salmeterol to an inhaled corticosteroid reduces allergen-induced serum IL-5 and peripheral blood eosinophils                                                                                                                       | Koopmans, , JG, Lutter, R, Jansen, HM; van der Zee, JS                                                                                                                                           | 2005 |
| Influenza virus vaccination of patients with chronic lung disease                                                                                                                                                                         | Gorse, , GJ, Otto, EE, Daughaday, CC, Newman, FK, Eickhoff, CS, Powers, DC; Lusk, RH                                                                                                             | 1997 |
| Improvement Thresholds for Morning Stiffness Duration in Patients Receiving Delayed- Versus Immediate-Release Prednisone for Rheumatoid Arthritis                                                                                         | Buttgereit, , F, Kent, JD, Holt, RJ, Grahn, AY, Rice, P, Alten, R; Yazici, Y                                                                                                                     | 2015 |
| Immune Reconstitution in Severely Immunosuppressed Antiretroviral-Naive HIV-1-Infected Patients Starting Efavirenz, Lopinavir-Ritonavir, or Atazanavir-Ritonavir Plus Tenofovir/Emtricitabine: final 48-Week Results (The Advanz-3 Trial) | Miro, , JM, Manzardo, C, Ferrer, E, Loncà, M, Guardo, AC, Podzamczar, D, Domingo, P, Curran, A, Clotet, B, Cruceta, A, Lozano, F, Pérez, I, Plana, M; Gatell, JM                                 | 2015 |
| Walnut Consumption Alters the Gastrointestinal Microbiota, Microbially Derived Secondary Bile Acids, and Health Markers in Healthy Adults: a Randomized Controlled Trial                                                                  | Holscher, , HD, Guetterman, HM, Swanson, KS, An, R, Matthan, NR, Lichtenstein, AH, Novotny, JA; Baer, DJ                                                                                         | 2018 |
| Innovative Steroid Treatment to Reduce Asthma Development in Children After First-time Rhinovirus Induced Wheezing                                                                                                                        | NCT03889743                                                                                                                                                                                      | 2019 |
| Simvastatin Suppresses Airway IL-17 and Upregulates IL-10 in Patients With Stable COPD                                                                                                                                                    | Maneechotesuwan, , K, Wongkajornsilp, A, Adcock, IM; Barnes, PJ                                                                                                                                  | 2015 |
| Effects of increased wholegrain consumption on immune and inflammatory markers in healthy low habitual wholegrain consumers                                                                                                               | Ampatzoglou, , A, Williams, CL, Atwal, KK, Maidens, CM, Ross, AB, Thielecke, F, Jonnalagadda, SS, Kennedy, OB; Yaqoob, P                                                                         | 2016 |
| Omega-3 fatty acids inhibit the up-regulation of endothelial chemokines in maintenance hemodialysis patients                                                                                                                              | Hung, , AM, Booker, C, Ellis, CD, Siew, ED, Graves, AJ, Shintani, A, Abumrad, NN, Himmelfarb, J, Ikizler, TA                                                                                     | 2015 |
| Genome-wide association analysis identifies CXCR4 gene as predictor of therapeutic response to teriparatide in severe osteoporosis                                                                                                        | Alonso, , N, Albagha, OME, Azfer, A, Riches, P, Ostanek, B, Kocjan, T, Marc, J, Langdahl, BL; Ralston, SH                                                                                        | 2018 |
| Brief Report: pharmacodynamics, Safety, and Clinical Efficacy of AMG 811, a Human Anti-Interferon-gamma Antibody, in Patients With Discoid Lupus Erythematosus                                                                            | Werth, , VP, Fiorentino, D, Sullivan, BA, Boedigheimer, MJ, Chiu, K, Wang, C, Arnold, GE, Damore, MA, Bigler, J, Welcher, AA, Russell, CB, Martin, DA; Chung, JB                                 | 2017 |
| Effect of treatment of chronic periodontitis on levels of serum markers of acute-phase inflammatory and vascular responses                                                                                                                | Ide, , M, McPartlin, D, Coward, PY, Crook, M, Lumb, P; Wilson, RF                                                                                                                                | 2003 |
| Benefits of micronized purified flavonoid fraction as adjuvant therapy on inflammatory response after sclerotherapy                                                                                                                       | Bogachev, , VY, Boldin, BV; Lobanov, VN                                                                                                                                                          | 2018 |

|                                                                                                                                                                                                                                                                           |                                                                                                                                                                                                                                                                                   |      |
|---------------------------------------------------------------------------------------------------------------------------------------------------------------------------------------------------------------------------------------------------------------------------|-----------------------------------------------------------------------------------------------------------------------------------------------------------------------------------------------------------------------------------------------------------------------------------|------|
| Adiponectin, interleukin-6, monocyte chemoattractant protein-1, and regional fat mass during 12-month randomized treatment with metformin and/or oral contraceptives in polycystic ovary syndrome                                                                         | Glintborg, , D, Mumm, H, Altinok, ML, Richelsen, B, Bruun, JM; Andersen, M                                                                                                                                                                                                        | 2014 |
| N-acetylcysteine administration prevents nonthyroidal illness syndrome in patients with acute myocardial infarction: a randomized clinical trial                                                                                                                          | Vidart, , J, Wajner, SM, Leite, RS, Manica, A, Schaan, BD, Larsen, PR; Maia, AL                                                                                                                                                                                                   | 2014 |
| Serial urinary IL-2, IL-6, IL-8, TNFalpha, UBC, CYFRA 21-1 and NMP22 during follow-up of patients with bladder cancer receiving intravesical BCG                                                                                                                          | Sanchez-Carbayo, , M, Urrutia, M, Romani, R, Herrero, M, Gonzalez de Buitrago, JM; Navajo, JA                                                                                                                                                                                     | 2001 |
| Symptom modifying effect of S-adenosil l-methionin in patients with diabetes-associated knee osteoarthritis: open randomized cross-over study                                                                                                                             | Trifonova, , E, Shirinsky, I, Sazonova, O, Shirinsky, V; Kalinovskaya, N                                                                                                                                                                                                          | 2015 |
| Lipid profiles and inflammatory markers after periodontal treatment in children with congenital heart disease and at risk for atherosclerosis                                                                                                                             | Bresolin, , AC, Pronsatti, MM, Pasqualotto, LN, Nassar, PO, Jorge, AS, da Silva, EA; Nassar, CA                                                                                                                                                                                   | 2013 |
| Influence of acarbose on postprandial dysmetabolism: results of an open-label randomized study                                                                                                                                                                            | Cherniak, , AY, Petrov, IM; Medvedeva, IV                                                                                                                                                                                                                                         | 2013 |
| Lack of additional effects of long-term, low-dose clarithromycin combined treatment compared with topical steroids alone for chronic rhinosinusitis in China: a randomized, controlled trial                                                                              | Deng, , J, Chen, F, Lai, Y, Luo, Q, Xu, R, Ou, C, Fu, Q; Shi, J                                                                                                                                                                                                                   | 2018 |
| The activity of nonspecific inflammation in hypertensive patients                                                                                                                                                                                                         | Oshchepkova, , EV, Dmitriev, VA, Titiov, VN, Rogoza, AN; Masenko, VP                                                                                                                                                                                                              | 2007 |
| Effect of anakinra on recurrent pericarditis among patients with colchicine resistance and corticosteroid dependence: the AIRTRIP randomized clinical trial                                                                                                               | Brucato, , A, Imazio, M, Gattorno, M, Lazaros, G, Maestroni, S, Carraro, M, Finetti, M, Cumetti, D, Carobbio, A, Ruperto, N, Marcolongo, R, Lorini, M, Rimini, A, Valenti, A, Erre, GL, Sormani, MP, Belli, R, Gaita, F; Martini, A                                               | 2016 |
| Pharmacodynamics and predictive biomarkers in patients treated with atacept: data from the APRIL-SLE trial                                                                                                                                                                | Isenberg, , DA, Wofsy, D, Li, Y, Licu, D, Wax, SD, Gordon, C; Rossi, CP                                                                                                                                                                                                           | 2013 |
| Intravenous anti-IL-13 mAb QAX576 for the treatment of eosinophilic esophagitis                                                                                                                                                                                           | Rothenberg, , ME, Wen, T, Greenberg, A, Alpan, O, Enav, B, Hirano, I, Nadeau, K, Kaiser, S, Peters, T, Perez, A, Jones, I, Arm, JP, Strieter, RM, Sabo, R; Gunawardena, KA                                                                                                        | 2015 |
| Lebrikizumab idiopathic pulmonary fibrosis trial: a phase II randomized, double-blind, placebo controlled study to assess efficacy and safety (RIFF)                                                                                                                      | Scalori, , A, Belloni, P, Ackrill, A, Kapugampola, L, Doyle, R; Kaminski, J                                                                                                                                                                                                       | 2014 |
| Analysis of 177Lu-DOTA-octreotate therapy-induced DNA damage in peripheral blood lymphocytes of patients with neuroendocrine tumors                                                                                                                                       | Denoyer, , D, Lobachevsky, P, Jackson, P, Thompson, M, Martin, OA; Hicks, RJ                                                                                                                                                                                                      | 2015 |
| Cognitive-behavioral therapy for sleep disturbance in patients undergoing peritoneal dialysis: a pilot randomized controlled trial                                                                                                                                        | Chen, , HY, Chiang, CK, Wang, HH, Hung, KY, Lee, YJ, Peng, YS, Wu, KD; Tsai, TJ                                                                                                                                                                                                   | 2008 |
| EASI P-EASI: utilizing a combination of serum biomarkers offers an objective measurement tool for disease severity in patients with atopic dermatitis                                                                                                                     | Thijs, , JL, Drylewicz, J, Fiechter, R, Strickland, I, Sleeman, MA, Herath, A, May, RD, Bruijnzeel-Koomen, CAFM, Knol, EF, Giovannone, B, De Bruin-Weller, S, Nierkens, S; Hijnen, DJ                                                                                             | 2018 |
| Effect of short-term folic acid supplementation on insulin sensitivity and inflammatory markers in overweight subjects                                                                                                                                                    | Solini, , A, Santini, E; Ferrannini, E                                                                                                                                                                                                                                            | 2006 |
| The effects of lebrikizumab in patients with mild asthma following whole lung allergen challenge                                                                                                                                                                          | Scheerens, , H, Arron, JR, Zheng, Y, Putnam, WS, Erickson, RW, Choy, DF, Harris, JM, Lee, J, Jarjour, NN; Matthews, JG                                                                                                                                                            | 2014 |
| Cilostazol reduces the progression of carotid intima-media thickness without increasing the risk of bleeding in patients with acute coronary syndrome during a 2-year follow-up                                                                                           | Ahn, , CM, Hong, SJ, Park, JH, Kim, JS; Lim, DS                                                                                                                                                                                                                                   | 2011 |
| Inhaled salmeterol and albuterol in asthmatic patients receiving high-dose inhaled corticosteroids                                                                                                                                                                        | Lai, , CK, Chan, CH, Ho, SS, Hui, AC; Lai, KN                                                                                                                                                                                                                                     | 1995 |
| Gemcitabine, oxaliplatin, levofolinate, 5-fluorouracil, granulocyte-macrophage colony-stimulating factor, and interleukin-2 (GOLFIG) versus FOLFOX chemotherapy in metastatic colorectal cancer patients: the GOLFIG-2 multicentric open-label randomized phase III trial | Correale, , P, Botta, C, Rotundo, MS, Guglielmo, A, Conca, R, Licchetta, A, Pastina, P, Bestoso, E, Ciliberto, D, Cusi, MG, Fioravanti, A, Guidelli, GM, Bianco, MT, Misso, G, Martino, E, Caraglia, M, Tassone, P, Mini, E, Mantovani, G, Ridolfi, R, Pirtoli, L; Tagliaferri, P | 2014 |
| Role of vitamin D in flare ups of rheumatoid arthritis                                                                                                                                                                                                                    | Dehghan, , A, Rahimpour, S, Soleymani-Salehabadi, H; Owlia, MB                                                                                                                                                                                                                    | 2014 |
| Effects of Liraglutide on Reperfusion Injury in Patients With ST-Segment-Elevation Myocardial Infarction                                                                                                                                                                  | Chen, , WR, Chen, YD, Tian, F, Yang, N, Cheng, LQ, Hu, SY, Wang, J, Yang, JJ, Wang, SF; Gu, XF                                                                                                                                                                                    | 2016 |
| Influence of Kneipp-hydrotherapy on immunoregulation                                                                                                                                                                                                                      | Kreutzfeldt, , A, Albrecht, B; Muller, K                                                                                                                                                                                                                                          | 2003 |
| Modulation of neutrophil and inflammation markers in chronic obstructive pulmonary disease by short-term azithromycin treatment                                                                                                                                           | Parnham, , MJ, Culić, O, Eraković, V, Munić, V, Popović-Grle, S, Barisić, K, Bosnar, M, Brajsa, K, Cepelak, I, Cuzić, S, Glojnaric, I, Manojlović, Z, Novak-Mircetić, R, Oresković, K, Pavicić-Beljak, V, Radošević, S; Sucić, M                                                  | 2005 |
| Logistical challenges and design considerations for studies using acute anterior cruciate ligament injury as a potential model for early posttraumatic osteoarthritis                                                                                                     | Lattermann, , C, Jacobs, CA, Bunnell, MP, Jochimsen, KN, Abt, JP, Reinke, EK, Gammon, LG, Huebner, JL, Kraus, VB; Spindler, KP                                                                                                                                                    | 2017 |
| Safety and efficacy of subcutaneous tocilizumab in early systemic sclerosis: results from the open-label period of the fascinate trial                                                                                                                                    | Khanna, , D, Denton, CP, Jhreis, A, Van Laar, JM, Burke, L, Spotswood, H, Lin, CJ, Pope, JE, Allanore, Y, Muller-Ladner, U, Siegel, J; Furst, DE                                                                                                                                  | 2016 |
| Effect of fermented milk prepared with two probiotic strains on Japanese cedar pollinosis in a double-blind placebo-controlled clinical study                                                                                                                             | Kawase, , M, He, F, Kubota, A, Hiramatsu, M, Saito, H, Ishii, T, Yasueda, H; Akiyama, K                                                                                                                                                                                           | 2009 |
| Myeloma cast nephropathy                                                                                                                                                                                                                                                  | Bridoux, , F, Hutchison, CA; Leung, N                                                                                                                                                                                                                                             | 2011 |
| Efficacy and safety of a probiotic preparation in the secondary prophylaxis of hepatic encephalopathy in cirrhotic patients: final results of a double blind, randomized, placebo controlled study                                                                        | Dhiman, , RK, Rana, BS, Agrawal, S, Garg, A, Chopra, M, Thumburu, KK, Khattri, A, Malhotra, S, Duseja, AK; Chawla, YK                                                                                                                                                             | 2014 |

|                                                                                                                                                                                                                                                  |                                                                                                                                                                                                                                                         |      |
|--------------------------------------------------------------------------------------------------------------------------------------------------------------------------------------------------------------------------------------------------|---------------------------------------------------------------------------------------------------------------------------------------------------------------------------------------------------------------------------------------------------------|------|
| Potential therapeutic impact of omega-3 long chain-polyunsaturated fatty acids on inflammation markers in Duchenne muscular dystrophy: a double-blind, controlled randomized trial                                                               | Rodriguez-Cruz, , M, Cruz-Guzman, ODR, Almeida-Becerril, T, Solis-Serna, AD, Atilano-Miguel, S, Sanchez-Gonzalez, JR, Barbosa-Cortes, L, Ruiz-Cruz, ED, Huicochea, JC, Cardenas-Conejo, A, Escobar-Cedillo, RE, Yam-Ontiveros, CA; Ricardez-Marcial, EF | 2018 |
| Procalcitonin guided antibiotic therapy of acute exacerbations of asthma: a randomized controlled trial                                                                                                                                          | Tang, , J, Long, W, Yan, L, Zhang, Y, Xie, J, Lu, G; Yang, C                                                                                                                                                                                            | 2013 |
| Aspirin desensitization for patients with aspirin-exacerbated respiratory disease: a randomized double-blind placebo-controlled trial                                                                                                            | Esmailzadeh, , H, Nabavi, M, Aryan, Z, Arshi, S, Bemanian, MH, Fallahpour, M; Mortazavi, N                                                                                                                                                              | 2015 |
| Human intervention study to assess the effects of supplementation with olive leaf extract on peripheral blood mononuclear cell gene expression                                                                                                   | Boss, , A, Kao, CH-J, Murray, PM, Marlow, G, Barnett, MPG; Ferguson, LR                                                                                                                                                                                 | 2016 |
| The effect of lornoxicam on TLR2 and TLR4 messenger RNA expression and tumor necrosis factor- $\alpha$ , interleukin-6, and interleukin-8 secretion in patients with systemic complications of acute pancreatitis                                | Gorsky, , VA, Agapov, MA, Khoreva, MV; Leonenko, IV                                                                                                                                                                                                     | 2015 |
| Gingyo-san enhances immunity and potentiates infectious bursal disease vaccination                                                                                                                                                               | Chen, , C-M, Hung, C-M, Yeh, C-C, Chong, K-Y, Chen, H-L, Chen, J-Y, Kao, S-T, Yen, C-C, Yeh, M-H; Lin, M-S                                                                                                                                              | 2011 |
| A comparison of continuous intravenous insulin and subcutaneous insulin among patients with type 2 diabetes and congestive heart failure exacerbation                                                                                            | Dungan, , KM, Osei, K, Gaillard, T, Moore, J; Binkley, P                                                                                                                                                                                                | 2015 |
| Effects of a Spirulina-based dietary supplement on cytokine production from allergic rhinitis patients                                                                                                                                           | Mao, , TK, Van de Water, J; Gershwin, ME                                                                                                                                                                                                                | 2005 |
| Protective effect of atorvastatin on acute systemic inflammation-induced endothelial dysfunction in hypercholesterolaemic subjects                                                                                                               | Vlachopoulos, , C, Aznaouridis, K, Dagre, A, Vasiliadou, C, Masoura, C, Stefanadi, E, Skoumas, J, Pitsavos, C; Stefanadis, C                                                                                                                            | 2007 |
| Monocyte-suppressing effects of simvastatin in patients with isolated hypertriglyceridemia                                                                                                                                                       | Krysiak, , R; Okopien, B                                                                                                                                                                                                                                | 2013 |
| Combination of maintenance hemodialysis with hemoperfusion: a safe and effective model of artificial kidney                                                                                                                                      | Chen, , SJ, Jiang, GR, Shan, JP, Lu, W, Huang, HD, Ji, G, Wu, P, Wu, GF, Wang, W, Zhu, C; Bian, F                                                                                                                                                       | 2011 |
| Vitamin D supplementation improves cytokine profiles in patients with congestive heart failure: a double-blind, randomized, placebo-controlled trial                                                                                             | Schleithoff, , SS, Zittermann, A, Tenderich, G, Berthold, HK, Stehle, P; Koerfer, R                                                                                                                                                                     | 2006 |
| Dose-dependent interleukin-3 stimulation of thrombopoiesis and neutropoiesis in patients with small-cell lung carcinoma before and following chemotherapy: a placebo-controlled randomized phase Ib study                                        | D'Hondt, , V, Weynants, P, Humblet, Y, Guillaume, T, Canon, JL, Beauduin, M, Duprez, P, Longueville, J, Müll, R; Chatelain, C                                                                                                                           | 1993 |
| Supervised oral protein supplementation during dialysis in patients with elevated C-reactive protein levels: a two phase, longitudinal, single center, open labeled study Clinical Research                                                      | Beddhu, , S, Filipowicz, R, Chen, X, Neilson, JL, Wei, G, Huang, Y; Greene, T                                                                                                                                                                           | 2015 |
| Modulation of peripheral immune responses by paclitaxel-ifosfamide-cisplatin chemotherapy in advanced non-small-cell lung cancer                                                                                                                 | Koufos, , N, Michailidou, D, Xynos, ID, Tomos, P, Athanasiadou, K, Kosmas, C; Tsavaris, N                                                                                                                                                               | 2013 |
| Effect of atorvastatin on circulating proinflammatory T-lymphocyte subsets and soluble CD40 ligand in patients with stable coronary artery disease—a randomized, placebo-controlled study                                                        | Alber, , HF, Frick, M, Suessenbacher, A, Doerler, J, Schirmer, M, Stocker, EM, Dichtl, W, Pachinger, O; Weidinger, F                                                                                                                                    | 2006 |
| Peripheral Biomarkers of Parkinson's Disease Progression and Pioglitazone Effects                                                                                                                                                                | Simon, , DK, Simuni, T, Elm, J, Clark-Matott, J, Graebner, AK, Baker, L, Dunlop, SR, Emborg, M, Kamp, C, Morgan, JC, Ross, GW, Sharma, S; Ravina, B                                                                                                     | 2015 |
| Immune regulatory effects of high dose vitamin D3 supplementation in a randomized controlled trial in relapsing remitting multiple sclerosis patients receiving IFN $\beta$ : the SOLARIUM study                                                 | Muris, , A-H, Smolders, J, Rolf, L, Thewissen, M, Hupperts, R; Damoiseaux, J                                                                                                                                                                            | 2016 |
| Prospective study of neurological responses to treatment with macrophage-targeted glucocerebrosidase in patients with type 3 Gaucher's disease                                                                                                   | Schiffmann, , R, Heyes, MP, Aerts, JM, Dambrosia, JM, Patterson, MC, DeGraba, T, Parker, CC, Zirzow, GC, Oliver, K, Tedeschi, G, Brady, RO; Barton, NW                                                                                                  | 1997 |
| Effects of short-term therapy with glibenclamide and repaglinide on incretin hormones and oxidative damage associated with postprandial hyperglycaemia in people with type 2 diabetes mellitus                                                   | Stephens, , JW, Bodvarsdottir, TB, Wareham, K, Prior, SL, Bracken, RM, Lowe, GD, Rumley, A, Dunseath, G, Luzio, S, Deacon, CF, Holst, JJ; Bain, SC                                                                                                      | 2011 |
| A randomized placebo controlled trial of aspirin effects on immune activation in chronically human immunodeficiency virus-infected adults on virologically suppressive antiretroviral therapy                                                    | O'Brien, , MP, Hunt, PW, Kitch, DW, Klingman, K, Stein, JH, Funderburg, NT, Berger, JS, Tebas, P, Clagett, B, Moisi, D, Utay, NS, Aweeka, F; Aberg, JA                                                                                                  | 2017 |
| Effects of periodontal therapy during pregnancy on periodontal status, biologic parameters, and pregnancy outcomes: a pilot study                                                                                                                | Offenbacher, , S, Lin, D, Strauss, R, McKaig, R, Irving, J, Barros, SP, Moss, K, Barrow, DA, Hefti, A; Beck, JD                                                                                                                                         | 2006 |
| Induction of interleukin-10 and suppressor of cytokine signalling-3 gene expression following peptide immunotherapy                                                                                                                              | Tarzi, , M, Klunker, S, Texier, C, Verhoef, A, Stapel, SO, Akdis, CA, Maillere, B, Kay, AB; Larché, M                                                                                                                                                   | 2006 |
| Effects of whole grain rye, with and without resistant starch type 2 supplementation, on glucose tolerance, gut hormones, inflammation and appetite regulation in an 11-14.5 hour perspective; a randomized controlled study in healthy subjects | Sandberg, , JC, Björck, IME; Nilsson, AC                                                                                                                                                                                                                | 2017 |
| Rosuvastatin might have an effect on C-reactive protein but not on rheumatoid disease activity: tayside randomized controlled study                                                                                                              | Kumar, , P, Kennedy, G, Khan, F, Pullar, T; Belch, JJ                                                                                                                                                                                                   | 2012 |
| No effect of homocysteine-lowering therapy on vascular inflammation and haemostasis in peripheral arterial occlusive disease                                                                                                                     | Scherthaner, , GH, Plank, C, Minar, E, Bieglmayer, C, Koppensteiner, R; Scherthaner, G                                                                                                                                                                  | 2006 |
| Randomized, double blind controlled trial of subcutaneous recombinant human interleukin-11 versus prednisolone in active Crohn's disease                                                                                                         | Herrlinger, , KR, Witthoeft, T, Raedler, A, Bokemeyer, B, Krummenerl, T, Schulzke, JD, Boerner, N, Kueppers, B, Emmrich, J, Mescheder, A, Schwertschlag, U, Shapiro, M; Stange, EF                                                                      | 2006 |
| Long-term effects of angiotensin II blockade with irbesartan on inflammatory markers in hemodialysis patients: a randomized double blind placebo controlled trial (SAFIR study)                                                                  | Peters, , CD, Kjaergaard, KD, Nielsen, CH, Christensen, KL, Bibby, BM, Jensen, JD; Jespersen, B                                                                                                                                                         | 2017 |
| Recurrent pericarditis in children and adolescents: a multicentre cohort study                                                                                                                                                                   |                                                                                                                                                                                                                                                         | 2016 |

|                                                                                                                                                                                                                                        |                                                                                                                                                                                                                                                                     |      |
|----------------------------------------------------------------------------------------------------------------------------------------------------------------------------------------------------------------------------------------|---------------------------------------------------------------------------------------------------------------------------------------------------------------------------------------------------------------------------------------------------------------------|------|
| Sustained remission of symptoms and improved health-related quality of life in patients with cryopyrin-associated periodic syndrome treated with canakinumab: results of a double-blind placebo-controlled randomized withdrawal study | Koné-Paut, , I, Lachmann, HJ, Kuemmerle-Deschner, JB, Hachulla, E, Leslie, KS, Mouy, R, Ferreira, A, Lheritier, K, Patel, N, Preiss, R; Hawkins, PN                                                                                                                 | 2011 |
| Neither moxifloxacin nor cefuroxime produces significant attenuation of inflammatory mediator release in patients exposed to cardiopulmonary bypass: a randomized controlled trial                                                     | Wiesner, , G, Braun, SL, Gruber, M, Gertler, R, Lange, R, Tassani, P; Martin, K                                                                                                                                                                                     | 2012 |
| Reduced Levels of D-dimer and Changes in Gut Microbiota Composition After Probiotic Intervention in HIV-Infected Individuals on Stable ART                                                                                             | Stiksrud, , B, Nowak, P, Nwosu, FC, Kvale, D, Thalme, A, Sonnerborg, A, Ueland, PM, Holm, K, Birkeland, SE, Dahm, AE, Sandset, PM, Rudi, K, Hov, JR, Dyrhol-Riise, AM; Trøseid, M                                                                                   | 2015 |
| Intradialytic exercise training reduces oxidative stress and epicardial fat: a pilot study                                                                                                                                             | Wilund, , KR, Tomayko, EJ, Wu, PT, Ryong Chung, H, Vallurupalli, S, Lakshminarayanan, B; Fernhall, B                                                                                                                                                                | 2010 |
| Therapy of type 1 diabetes with CD4+CD25highCD127-regulatory T cells prolongs survival of pancreatic islets - Results of one year follow-up                                                                                            | Marek-Trzonkowska, , N, Mysliwiec, M, Dobyszek, A, Grabowska, M, Derkowska, I, Juscinska, J, Owczuk, R, Szadkowska, A, Witkowski, P, Mlynarski, W, Jarosz-Chobot, P, Bossowski, A, Siebert, J; Trzonkowski, P                                                       | 2014 |
| Rosuvastatin and fenofibrate in patients with diabetes and low high density lipoprotein cholesterol: comparison of changes of lipid levels and some markers of inflammation                                                            | Polenova, , NV, Vaulin, NA, Masenko, VP, Iavelov, IS; Gratsianskii, NA                                                                                                                                                                                              | 2009 |
| Dupilumab progressively improves systemic and cutaneous abnormalities in patients with atopic dermatitis                                                                                                                               | Guttman-Yassky, , E, Bissonnette, R, Ungar, B, Suarez-Farinas, M, Ardeleanu, M, Esaki, H, Suprun, M, Estrada, Y, Xu, H, Peng, X, Silverberg, JI, Menter, A, Krueger, JG, Zhang, R, Chaudhry, U, Swanson, B, Graham, NMH, Pirozzi, G, Yancopoulos, GD; D Hamilton JD | 2019 |
| Sustainable Efficacy of Switching From Intravenous to Subcutaneous Tocilizumab Monotherapy in Patients With Rheumatoid Arthritis                                                                                                       | Ogata, , A, Atsumi, T, Fukuda, T, Hirabayashi, Y, Inaba, M, Ishiguro, N, Kai, M, Kawabata, D, Kida, D, Kohsaka, H, Matsumura, R, Minota, S, Mukai, M, Sumida, T, Takasugi, K, Tamaki, S, Takeuchi, T, Ueda, A, Yamamoto, K, Yamanaka, H, Yoshifuji, H; Nomura, A    | 2015 |
| A placebo-controlled, multicenter, double-blind, randomised, pharmacokinetic and pharmacodynamic trial of emricasan (IDN-6556) in subjects with acute-on chronic liver failure (ACLF)                                                  | Jalan, , R, Wright, G, McPherson, S, Frenette, C, Cave, M, Morris, M, Huyghe, M; Burgess, G                                                                                                                                                                         | 2015 |
| Phase ii study of digitoxin for CF                                                                                                                                                                                                     | Zeitlin, , P, Diener-West, M, Callahan, KA, Pollard, B, Lechtzin, N; Boyle, MP                                                                                                                                                                                      | 2015 |
| The Influence of Chronic Inflammation on Peripheral Motor Nerve Conduction Following Spinal Cord Injury: a Randomized Clinical Trial                                                                                                   | Allison, , DJ, Gabriel, DA, Klentrou, P, Josse, AR; Ditor, DS                                                                                                                                                                                                       | 2017 |
| A phase 2b dose-ranging efficacy and safety study of tralokinumab in adult patients with moderate to severe atopic dermatitis (AD)                                                                                                     | Wollenberg, , A, Howell, MD, Guttman-Yassky, E, Silverberg, JI, Birrell, C, Kell, C, Dawson, M; Van Der Merwe, R                                                                                                                                                    | 2017 |
| Comparison of outcome of allogeneic bone marrow transplantation with and without granulocyte colony-stimulating factor (lenograstim) donor-marrow priming in patients with chronic myelogenous leukemia                                | Ji, , SQ, Chen, HR, Wang, HX, Yan, HM, Pan, SP; Xun, CQ                                                                                                                                                                                                             | 2002 |
| Neurologic manifestations of the cryopyrin-associated periodic syndrome                                                                                                                                                                | Kitley, , JL, Lachmann, HJ, Pinto, A; Ginsberg, L                                                                                                                                                                                                                   | 2010 |
| Safety and Efficacy of Anakinra in Severe Hidradenitis Suppurativa: a Randomized Clinical Trial                                                                                                                                        | Tzanetakou, , V, Kanni, T, Giatrakou, S, Katoulis, A, Papadavid, E, Netea, MG, Dinarello, CA, van der Meer, JWM, Rigopoulos, D; Giamarellos-Bourboulis, EJ                                                                                                          | 2016 |
| Neutrophil-related gene expression and low-density granulocytes associated with disease activity and response to treatment in ANCA-associated vasculitis                                                                               | Grayson, , P, Carmona-Rivera, C, Xu, L, Lim, N, Gao, Z, Asare, A, Specks, U, Stone, J, Seo, P, Spiera, R, Langford, C, Kallenberg, C, St Clair, E, Tchao, N, Ytterberg, S, Merkel, P, Kaplan, M; Monach, P                                                          | 2015 |
| A randomized, clinical trial to evaluate two therapies, mycophenolate and rilonacept, in subjects with biopsy-proven alcoholic hepatitis                                                                                               | Morgan, T                                                                                                                                                                                                                                                           | 2014 |
| Long-term clarithromycin in cystic fibrosis: effects on inflammatory markers in BAL and clinical status                                                                                                                                | Doğru, , D, Dalgiç, F, Kiper, N, Özçelik, U, Yalçın, E, Aslan, AT, Gürçan, N, Sarıcaoglu, F, Gür, D, Karayazgan, Y; Firat, P                                                                                                                                        | 2009 |
| Resistance training in clinical, inflammatory process control in patients with moderate, severe and difficult control asthma                                                                                                           | RBR-4tbd4p                                                                                                                                                                                                                                                          | 2012 |
| Evaluation of Perindopril and Telmisartan for the Treatment of Nonalcoholic Fatty Liver Disease: a Randomized controlled trial                                                                                                         | ChiCTR-TRC-14005028                                                                                                                                                                                                                                                 | 2014 |
| Effect of punica granatum extract gel on gingival crevicular fluid levels of interleukin-1β, interleukin-8 and CCL28 levels: randomised controlled clinical trial                                                                      | Prakash, , J, Bhatnagar, V, Nath, S, Pulikkotil, S; Prajapati, VK                                                                                                                                                                                                   | 2017 |
| Lactobacillus and bifidobacterium in irritable bowel syndrome: symptom responses and relationship to cytokine profiles                                                                                                                 | O'Mahony, , L, McCarthy, J, Kelly, P, Hurley, G, Luo, F, Chen, K, O'Sullivan, GC, Kiely, B, Collins, JK, Shanahan, F; Quigley, EM                                                                                                                                   | 2005 |
| Effects of Melatonin on clinical manifestations, inflammation and sleep quality in patients with Rheumatoid Arthritis                                                                                                                  | RBR-8pqh2                                                                                                                                                                                                                                                           | 2018 |
| Parenteral nutrition providing a restricted amount of linoleic acid in severely burned patients: a randomised double-blind study of an olive oil-based lipid emulsion v. medium/long-chain triacylglycerols                            | García-de-Lorenzo, , A, Denia, R, Atlan, P, Martinez-Ratero, S, Le Brun, A, Evard, D; Bereziat, G                                                                                                                                                                   | 2005 |
| A randomized, double-masked, placebo-controlled trial of recombinant granulocyte colony-stimulating factor administration to preterm infants with the clinical diagnosis of early-onset sepsis                                         | Miura, , E, Procianoy, RS, Bittar, C, Miura, CS, Miura, MS, Mello, C; Christensen, RD                                                                                                                                                                               | 2001 |
| Evaluating the effect of Radio frequency and Cavitation on Biochemical Markers and Body Contouring in Overweight People                                                                                                                | IRCT2014042817475N1                                                                                                                                                                                                                                                 | 2014 |
| Inflammatory markers in orthodontic treatment with clear aligners: split mouth clinical trial                                                                                                                                          | ISRCTN32624758                                                                                                                                                                                                                                                      | 2017 |
| Nox 1 and 4 inhibition in type 1 diabetic kidney disease                                                                                                                                                                               | ACTRN12617001187336                                                                                                                                                                                                                                                 | 2017 |

|                                                                                                                                                                                                                                                                                                                                                |                                                                                                                                                                                                                                                                                             |      |
|------------------------------------------------------------------------------------------------------------------------------------------------------------------------------------------------------------------------------------------------------------------------------------------------------------------------------------------------|---------------------------------------------------------------------------------------------------------------------------------------------------------------------------------------------------------------------------------------------------------------------------------------------|------|
| Tralokinumab for severe, uncontrolled asthma (STRATOS 1 and STRATOS 2): two randomised, double-blind, placebo-controlled, phase 3 clinical trials                                                                                                                                                                                              | Panettieri, , RA, Sjobring, U, Peterffy, A, Wessman, P, Bowen, K, Piper, E, Colice, G; Brightling, CE                                                                                                                                                                                       | 2018 |
| A long-term extension study to investigate the safety and effectiveness of Tildrakizumab in patients with Psoriatic Arthritis and Ankylosing Spondylitis or Non-Radiographic Axial Spondyloarthritis who have previously completed other studies with Tildrakizumab                                                                            | EUCTR2018-001060-35-HU                                                                                                                                                                                                                                                                      | 2018 |
| L-cure in the treatment of chronic hepatitis B                                                                                                                                                                                                                                                                                                 | ChiCTR1800016645                                                                                                                                                                                                                                                                            | 2018 |
| Effect of vitamin D on inflammation and muscle damage in athletes                                                                                                                                                                                                                                                                              | IRCT2017042613678N27                                                                                                                                                                                                                                                                        | 2017 |
| Effects of protein supplementation in nutritional status of hemodialysis patients                                                                                                                                                                                                                                                              | RBR-8r4jpg                                                                                                                                                                                                                                                                                  | 2018 |
| Activity and safety of oral administration of SSR150106XB for the reduction of inflammation in patients with active rheumatoid arthritis (RA): a 4-week, multi-center, randomized, double-blind, placebo-controlled parallel group study of 90 µg administered once daily and 90µg once every other day - ACCORD-RA                            | EUCTR2007-000760-24-CZ                                                                                                                                                                                                                                                                      | 2007 |
| Extract of Perilla frutescens enriched for rosmarinic acid, a polyphenolic phytochemical, inhibits seasonal allergic rhinoconjunctivitis in humans                                                                                                                                                                                             | Takano, , H, Osakabe, N, Sanbongi, C, Yanagisawa, R, Inoue, K, Yasuda, A, Natsume, M, Baba, S, Ichiishi, E; Yoshikawa, T                                                                                                                                                                    | 2004 |
| Nicotinamide Riboside Supplementation for Treating Arterial Stiffness and Elevated Systolic Blood Pressure in Patients With Moderate to Severe CKD                                                                                                                                                                                             | NCT04040959                                                                                                                                                                                                                                                                                 | 2019 |
| Calorie Restriction in Multiple Sclerosis                                                                                                                                                                                                                                                                                                      | NCT04042415                                                                                                                                                                                                                                                                                 | 2019 |
| Clinical and immunologic assessment of patients with psoriasis in a randomized, double-blind, placebo-controlled trial using recombinant human interleukin 10                                                                                                                                                                                  | Kimball, , AB, Kawamura, T, Tejura, K, Boss, C, Hancox, AR, Vogel, JC, Steinberg, SM, Turner, ML; Blauvelt, A                                                                                                                                                                               | 2002 |
| The benefit of minocycline on negative symptoms of schizophrenia in patients with recent-onset psychosis (BeneMin): a randomised, double-blind, placebo-controlled trial                                                                                                                                                                       | Deakin, , B, Suckling, J, Barnes, TRE, Byrne, K, Chaudhry, IB, Dazzan, P, Drake, RJ, Giordano, A, Husain, N, Jones, PB, Joyce, E, Knox, E, Krynicki, C, Lawrie, SM, Lewis, S, Lisiecka-Ford, DM, Nikkheslat, N, Pariente, CM, Smallman, R, Watson, A, Williams, SCR, Upthegrove, R; Dunn, G | 2018 |
| CD25 Blockade Delays Regulatory T Cell Reconstitution and Does Not Prevent Graft-versus-Host Disease After Allogeneic Hematopoietic Cell Transplantation                                                                                                                                                                                       | Locke, , FL, Pidala, J, Storer, B, Martin, PJ, Pulsipher, MA, Chauncey, TR, Jacobsen, N, Kröger, N, Walker, I, Light, S, Shaw, BE, Beato, F, Laport, GG, Nademance, A, Keating, A, Socie, G; Anasetti, C                                                                                    | 2017 |
| Study on the positive effects of treatment with linagliptin on the arteries of patients with diabetes                                                                                                                                                                                                                                          | EUCTR2012-005220-15-NL                                                                                                                                                                                                                                                                      | 2013 |
| Safety, Tolerability and Efficacy of an antibody, which blocks the pro-inflammatory mediator Interleukin-6, in patients with late Antibody-mediated rejection of a transplanted kidney - A Pilot Trial                                                                                                                                         | EUCTR2017-001604-30-AT                                                                                                                                                                                                                                                                      | 2017 |
| comparison between methotrexate versus methotrexate plus leflunomide treatment in arthritis associated with psoriasis                                                                                                                                                                                                                          | CTRI/2017/06/008888                                                                                                                                                                                                                                                                         | 2017 |
| Anti-Inflammatory Therapy With Canakinumab for the Prevention and Management of Diabetes                                                                                                                                                                                                                                                       | Everett, , BM, Donath, MY, Pradhan, AD, Thuren, T, Pais, P, Nicolau, JC, Glynn, RJ, Libby, P; Ridker, PM                                                                                                                                                                                    | 2018 |
| Phase I/II study of peptide vaccination associated with tumoral immunomodulation with proinflammatory cytokines and imiquimod in patients with advanced metastatic melanoma                                                                                                                                                                    | EUCTR2010-020435-40-BE                                                                                                                                                                                                                                                                      | 2010 |
| Effect of a high-egg diet on cardiometabolic risk factors in people with type 2 diabetes: the Diabetes and Egg (DIABEGG) Study-randomized weight-loss and follow-up phase                                                                                                                                                                      | Fuller, , NR, Sainsbury, A, Caterson, ID, Denyer, G, Fong, M, Geroft, J, Leung, C, Lau, NS, Williams, KH, Januszewski, AS, Jenkins, AJ; Markovic, TP                                                                                                                                        | 2018 |
| IMMUNOTHERAPY OF MAINTENANCE IN THE PATIENTS WITH METASTATIC MELANOMA, CLINICAL BENEFIT AFTER CHEMOTHERAPY - ND                                                                                                                                                                                                                                | EUCTR2008-006366-29-IT                                                                                                                                                                                                                                                                      | 2009 |
| The effect of atorvastatin plus aspirin compared with a non-therapeutic substance on the function of the blood vessels and inflammation in HIV patients under treatment presenting a low risk of cardiovascular disease                                                                                                                        | RBR-39bjm4                                                                                                                                                                                                                                                                                  | 2015 |
| Children with human immunodeficiency virus (HIV) in Africa, pharmacokinetics and acceptability/adherence of simple antiretroviral regimen (CHAPAS-3)                                                                                                                                                                                           | PACTR201006000222401                                                                                                                                                                                                                                                                        | 2010 |
| Renal and Humoral Effects of Sevelamer Carbonate in Patients with proteinuric nephropathies                                                                                                                                                                                                                                                    | EUCTR2012-005416-26-IT                                                                                                                                                                                                                                                                      | 2013 |
| The PRIMO II Study: paricalcitol Injection benefits in Renal failure Induced cardiac Morbidity in Subjects with Chronic Kidney Disease Stage 5. Estudio Primo II: beneficios de Paricalcitol inyectable sobre la morbilidad cardiaca provocada por la insuficiencia renal en los sujetos con enfermedad renal crónica en estadio 5. - PRIMO II | EUCTR2007-005092-33-ES                                                                                                                                                                                                                                                                      | 2008 |
| The PRIMO Study: paricalcitol Capsules benefits in Renal failure Induced cardiac Morbidity in Subjects with Chronic Kidney Disease Stage 3/4 - PRIMO I                                                                                                                                                                                         | EUCTR2007-001689-34-CZ                                                                                                                                                                                                                                                                      | 2008 |
| An open, randomized study treating refractory adult-onset Still's disease (AOSD) with interleukin-1 receptor antagonist anakinra (KineretR), compared to an established, single anti-rheumatic drug treatment. - AOSD Study 05                                                                                                                 | EUCTR2005-003173-24-FI                                                                                                                                                                                                                                                                      | 2005 |
| Roxithromycin treatment prevents progression of peripheral arterial occlusive disease in Chlamydia pneumoniae seropositive men: a randomized, double-blind, placebo-controlled trial                                                                                                                                                           | Wiesli, , P, Czerwenka, W, Meniconi, A, Maly, FE, Hoffmann, U, Vetter, W; Schulthess, G                                                                                                                                                                                                     | 2002 |

|                                                                                                                                                                                                                                    |                                                                                                                                                                                                                                     |      |
|------------------------------------------------------------------------------------------------------------------------------------------------------------------------------------------------------------------------------------|-------------------------------------------------------------------------------------------------------------------------------------------------------------------------------------------------------------------------------------|------|
| Children with human immunodeficiency virus (HIV) in Africa - pharmacokinetics and acceptability/adherence of simple antiretroviral regimens (CHAPAS-3 trial)                                                                       | ISRCTN69078957                                                                                                                                                                                                                      | 2010 |
| An evaluation of potential therapies to inhibit cerebral emboli in dementia                                                                                                                                                        | ISRCTN43384456                                                                                                                                                                                                                      | 2007 |
| The genotype CC of IL-28B SNP rs12979860 is significantly associated with a sustained virological response in chronic HCV-infected Pakistani patients                                                                              | Khubaib, , B, Saleem, S, Idrees, M, Afzal, S; Wasim, M                                                                                                                                                                              | 2015 |
| Maintenance of skin clearance with ixekizumab treatment of psoriasis: three-year results from the UNCOVER-3 study                                                                                                                  | Leonardi, , C, Maari, C, Philipp, S, Goldblum, O, Zhang, L, Burkhardt, N, Ball, S, Mallbris, L, Gonzalez, P, Fernández-Peñas, P; Puig, L                                                                                            | 2018 |
| Effects of 17beta-oestradiol plus different doses of drospirenone on adipose tissue, adiponectin and atherogenic metabolites in postmenopausal women                                                                               | Tankó, , LB; Christiansen, C                                                                                                                                                                                                        | 2005 |
| Evaluation of nutrition in adults on capd by bioelectrical impedance analysis (BIA) and anthropometry and the impact of intervention on their nutrition                                                                            | Krishnamoorthy, V                                                                                                                                                                                                                   | 2015 |
| Cotreatment with the alpha-glucosidase inhibitor miglitol and DPP-4 inhibitor sitagliptin improves glycemic control and reduces the expressions of CVD risk factors in type 2 diabetic Japanese patients                           | Imai, , C, Saito, M, Mochizuki, K, Fuchigami, M, Goda, T; Osonoi, T                                                                                                                                                                 | 2014 |
| Macrolide Use and Neutrophil Function/Cytokine Levels in Hospitalized Patients with Community-Acquired Pneumonia: a Pilot Study                                                                                                    | Arnold, , FW, Bordon, J, Fernandez-Botran, R, Rane, MJ, Uriarte, SM, Kelley, R, Wiemken, TL, Peyrani, P; Ramirez, JA                                                                                                                | 2016 |
| Effect of Laparoscopic Peritoneal Lavage and Drainage and Continuous Venovenous Diahemofiltration on Severe Acute Pancreatitis                                                                                                     | Wang, , G, Liu, H, Xu, L, Wen, P, Wen, J, Zhou, SF; Xiao, X                                                                                                                                                                         | 2017 |
| A therapeutic trial of decitabine and vorinostat in combination with chemotherapy for relapsed/refractory acute lymphoblastic leukemia                                                                                             | Burke, , MJ, Lamba, JK, Pounds, S, Cao, X, Ghodke-Puranik, Y, Lindgren, BR, Weigel, BJ, Verneris, MR; Miller, JS                                                                                                                    | 2014 |
| Control of airway inflammation maintained at a lower steroid dose with 100/50 mug of fluticasone propionate/salmeterol                                                                                                             | Jarjour, , NN, Wilson, SJ, Koenig, SM, Laviolette, M, Moore, WC, Davis, WB, Doherty, DE, Hamid, Q, Israel, E, Kavuru, MS, Ramsdell, JW, Tashkin, DP, Reilly, DS, Yancey, SW, Edwards, LD, Stauffer, JL, Dorinsky, PM; Djukanovic, R | 2006 |
| Sputum eosinophilia and the short term response to inhaled mometasone in chronic obstructive pulmonary disease                                                                                                                     | Brightling, , CE, McKenna, S, Hargadon, B, Birring, S, Green, R, Siva, R, Berry, M, Parker, D, Monteiro, W, Pavord, ID; Bradding, P                                                                                                 | 2005 |
| Activity of secukinumab, an anti-IL-17A antibody, on brain lesions in RRMS: results from a randomized, proof-of-concept study                                                                                                      | Havrdová, , E, Belova, A, Goloborodko, A, Tisserant, A, Wright, A, Wallstroem, E, Garren, H, Maguire, RP; Johns, DR                                                                                                                 | 2016 |
| Impact of immune interventions on proviral HIV-1 DNA decay in patients receiving highly active antiretroviral therapy                                                                                                              | Lafeuillade, , A, Poggi, C, Chadapaud, S, Hittinger, G, Khiri, H; Halfon, P                                                                                                                                                         | 2001 |
| Effect of acupuncture compared with placebo-acupuncture at P6 as additional antiemetic prophylaxis in high-dose chemotherapy and autologous peripheral blood stem cell transplantation: a randomized controlled single-blind trial | Streitberger, , K, Friedrich-Rust, M, Bardenheuer, H, Unnebrink, K, Windeler, J, Goldschmidt, H; Egerer, G                                                                                                                          | 2003 |
| The effects of Ginkgo biloba extract added to haloperidol on peripheral T cell subsets in drug-free schizophrenia: a double-blind, placebo-controlled trial                                                                        | Zhang, , XY, Zhou, DF, Cao, LY; Wu, GY                                                                                                                                                                                              | 2006 |
| Efficacy and safety of tralokinumab in patients with severe uncontrolled asthma: a randomised, double-blind, placebo-controlled, phase 2b trial                                                                                    | Brightling, , CE, Chanez, P, Leigh, R, O'Byrne, PM, Korn, S, She, D, May, RD, Streicher, K, Ranade, K; Piper, E                                                                                                                     | 2015 |
| Randomized study on the efficacy of cognitive-behavioral therapy for insomnia secondary to breast cancer, part II: immunologic effects                                                                                             | Savard, , J, Simard, S, Ivers, H; Morin, CM                                                                                                                                                                                         | 2005 |
| Interleukin-2 therapy in relapsed acute myelogenous leukemia                                                                                                                                                                       | Meloni, , G, Vignetti, M, Pogliani, E, Invernizzi, R, Allione, B, Minto, S, Sica, S, Leoni, F, Selleri, C; Mandelli, F                                                                                                              | 1997 |
| Bioequivalence of canakinumab liquid pre-filled syringe and reconstituted lyophilized formulations following 150 mg subcutaneous administration: a randomized study in healthy subjects                                            | Chioato, , A, Nosedà, E, Colin, L, Matott, R, Skerjanec, A; Dietz, AJ                                                                                                                                                               | 2013 |
| Relationships between cellular immune responses and treatment outcomes with interferon and ribavirin in HIV/hepatitis C virus co-infection                                                                                         | Graham, , CS, Wells, A, Liu, T, Sherman, KE, Peters, M, Chung, RT, Bhan, AK, Andersen, J; Koziel, MJ                                                                                                                                | 2006 |
| The rationale and design of the perindopril genetic association study (PERGENE): a pharmacogenetic analysis of angiotensin-converting enzyme inhibitor therapy in patients with stable coronary artery disease                     | Brugts, , JJ, De Maat, MPM, Boersma, E, Wittteman, JCM, Van Duijn, C, Uitterlinden, AG, Bertrand, M, Remme, W, Fox, K, Ferrari, R, Danser, AHJ; Simoons, ML                                                                         | 2009 |
| Phase I clinical trial of adoptive immunotherapy for acute myelogenous leukemia and myelodysplastic syndrome, using gene-modified autologous lymphocytes expressing WT1-Specific T-Cell receptor                                   | Tanimoto, , K, Fujiwara, H, Tawara, I, Masuya, M, Kageyama, S, Nishida, T, Murata, M, Terakura, S, Akatsuka, Y, Ikeda, H, Miyahara, Y, Nukaya, I, Takesako, K, Emi, N, Katayama, N, Shiku, H; Yasukawa, M                           | 2016 |
| A phase I trial of Janus kinase (JAK) inhibition with INCB039110 in acute graft-versus-host disease (aGVHD)                                                                                                                        | Schroeder, , MA, Khoury, HJ, Jagasia, M, Ali, H, Schiller, GJ, Arbushites, M, Delaite, P, Yan, Y, Rhein, K, Perales, M-A, Chen, Y-B; DiPersio, JF                                                                                   | 2016 |
| Ixekizumab provides improvements through 52 weeks in physical function, quality of life, and work productivity in biologic disease-modifying antirheumatic drug-naïve patients with active psoriatic arthritis                     | Gottlieb, , A, Husni, E, Lee, C, Lin, C-Y, Burge, R, Shuler, C; Gladman, D                                                                                                                                                          | 2017 |
| Acute rejection characteristics from a prospective, randomized, double-blind, placebo-controlled multicenter trial of early corticosteroid withdrawal                                                                              | Gaber, , AO, Moore, LW, Alloway, RR, Woodle, ES, Pirsch, J, Shihab, F, Henning, A, Fitzsimmons, W, Holman, J, Reisfield, R; First, MR                                                                                               | 2013 |
| Randomized pilot trial of a synbiotic dietary supplement in chronic HIV-1 infection                                                                                                                                                | Schunter, , M, Chu, H, Hayes, TL, McConnell, D, Crawford, SS, Luciw, PA, Bengmark, S, Asmuth, DM, Brown, J, Bevins, CL, Shacklett, BL; Critchfield, JW                                                                              | 2012 |

|                                                                                                                                                                                                                                                                                     |                                                                                                                                                                                                                             |      |
|-------------------------------------------------------------------------------------------------------------------------------------------------------------------------------------------------------------------------------------------------------------------------------------|-----------------------------------------------------------------------------------------------------------------------------------------------------------------------------------------------------------------------------|------|
| Long-term safety and efficacy of riloncept in patients with systemic juvenile idiopathic arthritis                                                                                                                                                                                  | Lovell, , DJ, Giannini, EH, Reiff, AO, Kimura, Y, Li, S, Hashkes, PJ, Wallace, CA, Onel, KB, Foell, D, Wu, R, Biedermann, S, Hamilton, JD; Radin, AR                                                                        | 2013 |
| Longterm safety and effectiveness of the anti-interleukin 6 receptor monoclonal antibody tocilizumab in patients with systemic juvenile idiopathic arthritis in Japan                                                                                                               | Yokota, , S, Imagawa, T, Mori, M, Miyamae, T, Takei, S, Iwata, N, Umebayashi, H, Murata, T, Miyoshi, M, Tomiita, M, Nishimoto, N; Kishimoto, T                                                                              | 2014 |
| Efficacy and safety of an anti-IL-13 mAb in patients with severe asthma: a randomized trial                                                                                                                                                                                         | De Boever, , EH, Ashman, C, Cahn, AP, Locantore, NW, Overend, P, Pouliquen, IJ, Serone, AP, Wright, TJ, Jenkins, MM, Panesar, IS, Thiagarajah, SS; Wenzel, SE                                                               | 2014 |
| Safety of tildrakizumab for moderate-to-severe plaque psoriasis: pooled analysis of three randomized controlled trials                                                                                                                                                              | Blauvelt, , A, Reich, K, Papp, KA, Kimball, AB, Gooderham, M, Tying, SK, Sinclair, R, Thaci, D, Li, Q, Cichanowitz, N, Green, S; La Rosa, C                                                                                 | 2018 |
| Combination pravastatin and valsartan treatment has additive beneficial effects to simultaneously improve both metabolic and cardiovascular phenotypes beyond that of monotherapy with either drug in patients with primary hypercholesterolemia                                    | Koh, , KK, Lim, S, Choi, H, Lee, Y, Han, SH, Lee, K, Oh, PC, Sakuma, I, Shin, EK; Quon, MJ                                                                                                                                  | 2013 |
| Differences in responses upon corticosteroid therapy between smoking and non-smoking patients with COPD                                                                                                                                                                             | Van Overveld, , FJ, Demkow, U, Górecka, D, De Backer, WA; Zieliński, J                                                                                                                                                      | 2006 |
| Subcutaneous methotrexate in patients with moderate-to-severe psoriasis: a critical appraisal                                                                                                                                                                                       | Tsakok, , T, Jabbar-Lopez, ZK; Smith, CH                                                                                                                                                                                    | 2018 |
| HIV-1 vaccine-induced immunity in the test-of-concept Step Study: a case-cohort analysis                                                                                                                                                                                            | McElrath, , MJ, De Rosa, SC, Moodie, Z, Dubey, S, Kierstead, L, Janes, H, Defawe, OD, Carter, DK, Hural, J, Akondy, R, Buchbinder, SP, Robertson, MN, Mehrotra, DV, Self, SG, Corey, L, Shiver, JW; Casimiro, DR            | 2008 |
| The HYDILE trial: efficacy and tolerance of a quadruple combination of reverse transcriptase inhibitors versus the same regimen plus hydroxyurea or hydroxyurea and interleukin-2 in HIV-infected patients failing protease inhibitor-based combinations                            | Lafeuillade, , A, Hittinger, G, Chadapaud, S, Maillefet, S, Rieu, A; Poggi, C                                                                                                                                               | 2002 |
| A prospective randomized controlled study of long-term combination therapy using ursodeoxycholic acid and bezafibrate in patients with primary biliary cirrhosis and dyslipidemia                                                                                                   | Hosonuma, , K, Sato, K, Yamazaki, Y, Yanagisawa, M, Hashizume, H, Horiguchi, N, Kakizaki, S, Kusano, M; Yamada, M                                                                                                           | 2015 |
| Effects of intermittent IL-2 alone or with peri-cycle antiretroviral therapy in early HIV infection: the STALWART study                                                                                                                                                             | Tavel, , JA, Babiker, A, Fox, L, Gey, D, Lopardo, G, Markowitz, N, Paton, N, Wentworth, D; Wyman, N                                                                                                                         | 2010 |
| Treatment extension of pegylated interferon alpha and ribavirin does not improve SVR in patients with genotypes 2/3 without rapid virological response (OPTEx Trial): a prospective, randomized, two-arm, multicentre phase IV clinical trial                                       | Heidrich, , B, Cordes, H-J, Klinker, H, Moller, B, Naumann, U, Rossle, M, Kraus, MR, Boker, KH, Roggel, C, Schuchmann, M, Stoeck, A, Trein, A, Hardtke, S, Gonnermann, A, Koch, A, Wedemeyer, H, Manns, MP; Cornberg, M     | 2015 |
| Gene Therapy in Neovascular Age-related Macular Degeneration: three-Year Follow-up of a Phase 1 Randomized Dose Escalation Trial                                                                                                                                                    | Constable, , IJ, Lai, CM, Magno, AL, French, MA, Barone, SB, Schwartz, SD, Blumenkranz, MS, Degli-Esposti, MA; Rakoczy, EP                                                                                                  | 2017 |
| Minimal residual disease by MFC in acute lymphoblastic leukemia in children                                                                                                                                                                                                         | Buldini, , B, Varotto, E; Basso, G                                                                                                                                                                                          | 2018 |
| Regulation of YKL-40 expression by corticosteroids: effect on pro-inflammatory macrophages in vitro and its modulation in COPD in vivo                                                                                                                                              | Kunz, , LI, van't Wout, EF, van Schadewijk, A, Postma, DS, Kerstjens, HA, Sterk, PJ; Hiemstra, PS                                                                                                                           | 2015 |
| Clinical outcome and immune recovery after adoptive infusion of BPX-501 cells (donor T cells transduced with iC9 suicide gene) in children with hemoglobinopathies and diamond-blackfan anemia given alpha/beta T cell depleted HLA-haploidentical stem cell transplantation (HSCT) | Bertaina, , A, Merli, P, Pagliara, D, Pira, GL, De Angelis, B, Brescia, LP, Strocchio, L, Del Bufalo, F, Montanari, M, Lucarelli, B, Algeri, M, French, M, Moseley, A; Locatelli, F                                         | 2016 |
| Quality-of-life improvements in cutaneous T-cell lymphoma patients treated with denileukin diftitox (ONTAK)                                                                                                                                                                         | Duvic, , M, Kuzel, TM, Olsen, EA, Martin, AG, Foss, FM, Kim, YH, Heald, PW, Bacha, P, Nichols, J; Liepa, A                                                                                                                  | 2002 |
| Daclizumab high-yield process in relapsing-remitting multiple sclerosis (SELECT): a randomised, double-blind, placebo-controlled trial                                                                                                                                              | Gold, , R, Giovannoni, G, Selmaj, K, Havrdova, E, Montalban, X, Radue, EW, Stefoski, D, Robinson, R, Riester, K, Rana, J, Elkins, J; O'Neill, G                                                                             | 2013 |
| Efficacy and safety of lebrikizumab in adult patients with mild-to-moderate asthma not receiving inhaled corticosteroids                                                                                                                                                            | Korenblat, , P, Kerwin, E, Leshchenko, I, Yen, K, Holweg, CTJ, Anzueta-Cabrera, J, Martin, C, Putnam, WS, Governale, L, Olsson, J; Matthews, JG                                                                             | 2018 |
| eSET or eDET Associated to PGT in IVF                                                                                                                                                                                                                                               | NCT03758833                                                                                                                                                                                                                 | 2018 |
| Secukinumab for moderate-to-severe palmoplantar pustular psoriasis: results of the 2PRECISE study                                                                                                                                                                                   | Mrowietz, , U, Bachelez, H, Burden, AD, Rissler, M, Sieder, C, Orsenigo, R; Chaouche-Teyara, K                                                                                                                              | 2019 |
| Effective treatment of refractory CMV reactivation after allogeneic stem cell transplantation with in vitro-generated CMV pp65-specific CD8+ T-cell lines                                                                                                                           | Meij, , P, Jedema, I, Zandvliet, ML, Van Der Heiden, PLJ, Van De Meent, M, Van Egmond, HME, Van Liempt, E, Hoogstraten, C, Kruihof, S, Veld, S, Marijt, EWA, Von Dem Borne, PA, Lankester, AC, Halkes, CJM; Falkenburg, JHF | 2012 |
| Imiquimod 5-percent cream does not alter the natural history of recurrent herpes genitalis: a phase II, randomized, double-blind, placebo-controlled study                                                                                                                          | Schacker, , TW, Conant, M, Thoming, C, Stanczak, T, Wang, Z; Smith, M                                                                                                                                                       | 2002 |
| Blood Eosinophils and Outcomes in Severe Hospitalized Exacerbations of COPD                                                                                                                                                                                                         |                                                                                                                                                                                                                             | 2016 |
| Management and outcome of BK viremia in renal transplant recipients: a prospective single-center study                                                                                                                                                                              | Sood, , P, Senanayake, S, Sujeet, K, Medipalli, R, Zhu, YR, Johnson, CP; Hariharan, S                                                                                                                                       | 2012 |
| Treatment of metastatic melanoma with combined chemotherapy containing cisplatin, vinblastine and dacarbazine (CVD) and biotherapy using interleukin-2 and interferon-alpha                                                                                                         | Legha, , SS, Ring, S, Bedikian, A, Plager, C, Eton, O, Buzaid, AC; Papadopoulos, N                                                                                                                                          | 1996 |
| Randomised phase II study of docetaxel plus vandetanib versus docetaxel followed by vandetanib in patients with persistent or recurrent epithelial ovarian, fallopian tube or primary peritoneal carcinoma: SWOG S0904                                                              | Coleman, , RL, Moon, J, Sood, AK, Hu, W, Delmore, JE, Bonebrake, AJ, Anderson, GL, Chambers, SK; Markman, M                                                                                                                 | 2014 |

|                                                                                                                                                                                                                          |                                                                                                                                                                                                                                                   |      |
|--------------------------------------------------------------------------------------------------------------------------------------------------------------------------------------------------------------------------|---------------------------------------------------------------------------------------------------------------------------------------------------------------------------------------------------------------------------------------------------|------|
| The effect of ixekizumab on scalp and nail psoriasis and health outcome measures over four years of open-label treatment in a phase 2 study in chronic plaque psoriasis                                                  | Kimball, , A, Zachariae, C, Burge, R, Cameron, G, McKean-Matthews, M; Lebowhl, M                                                                                                                                                                  | 2017 |
| Ustekinumab in treatment of Crohn's disease: design, development, and potential place in therapy                                                                                                                         | Deepak, , P; Loftus, EV                                                                                                                                                                                                                           | 2016 |
| Acute and short-term chronic testosterone fluctuation effects on glucose homeostasis, insulin sensitivity, and adiponectin: a randomized, double-blind, placebo-controlled, crossover study                              | Host, , C, Gormsen, LC, Hougaard, DM, Christiansen, JS, Pedersen, SB; Gravholt, CH                                                                                                                                                                | 2014 |
| Effect of Bifidobacterium bifidum fermented milk on Helicobacter pylori and serum pepsinogen levels in humans                                                                                                            | Miki, , K, Urita, Y, Ishikawa, F, Iino, T, Shibahara-Sone, H, Akahoshi, R, Mizusawa, S, Nose, A, Nozaki, D, Hirano, K, Nonaka, C; Yokokura, T                                                                                                     | 2007 |
| Sequential peginterferon ALPHA-2a and telbivudine or vice versa for HBEAG-negative chronic hepatitis B: preliminary end-of-treatment results of the TEL-B-PEG randomized trial                                           | Piccolo, , P, Lenci, I, Di Paolo, D, Demelia, L, Sorbello, O, Nosotti, L; Angelico, M                                                                                                                                                             | 2011 |
| Daclizumab hyp monotherapy improved health-related quality of life parameters in relapsing-remitting multiple sclerosis: findings of the SELECT trial                                                                    | Selmaj, , K, Havrdova, E, Gold, R, Greenberg, S, Umans, K; Elkins, J                                                                                                                                                                              | 2012 |
| Combination of SABR and L19-IL2 in Patients With Stage IV Lung Cancer (ImmunoSABR)                                                                                                                                       | NCT02735850                                                                                                                                                                                                                                       | 2016 |
| Regulatory effects of stage-treatment with established Chinese herbal formulas on inflammatory mediators in pediatric asthma                                                                                             | Li, , S, Wang, Y, Shi, Y, Yu, J, Sun, W, Hu, H; Zhang, Y                                                                                                                                                                                          | 2013 |
| Randomised trial and open-label extension study of an anti-interleukin-6 antibody in Crohn's disease (ANDANTE I and II)                                                                                                  | Danese, , S, Vermeire, S, Hellstern, P, Panaccione, R, Rogler, G, Fraser, G, Kohn, A, Desreumaux, P, Leong, RW, Comer, GM, Cataldi, F, Banerjee, A, Maguire, MK, Li, C, Rath, N, Beebe, J; Schreiber, S                                           | 2019 |
| In vitro glucocorticoid sensitivity is associated with clinical glucocorticoid therapy outcome in rheumatoid arthritis                                                                                                   | Quax, , RA, Koper, JW, de Jong, PH, van Heerebeek, R, Weel, AE, Huisman, AM, van Zeben, D, de Jong, FH, Lamberts, SW, Hazes, JM; Feelders, RA                                                                                                     | 2012 |
| Dornase alfa should be the first drug used in CF                                                                                                                                                                         | Anbar, RD                                                                                                                                                                                                                                         | 2013 |
| Interleukin 6 inhibition and coronary artery disease in a high-risk population: a prospective community-based clinical study                                                                                             | Bacchiega, , BC, Bacchiega, AB, Usnayo, MJG, Bedirian, R, Singh, G; Pinheiro, GRC                                                                                                                                                                 | 2017 |
| A randomized study of low-dose interleukin-2 subcutaneous immunotherapy versus interleukin-2 plus interferon-alpha as first line therapy for metastatic renal cell carcinoma                                             | Lissoni, , P, Barni, S, Ardizzoia, A, Andres, M, Scardino, E, Cardellini, P, Della Bitta, R; Tancini, G                                                                                                                                           | 1993 |
| Phase 3 trials of ixekizumab in moderate-to-severe plaque psoriasis                                                                                                                                                      |                                                                                                                                                                                                                                                   | 2016 |
| Immunotherapy for advanced renal cell cancer                                                                                                                                                                             | Coppin, , C, Porzolt, F, Awa, A, Kumpf, J, Coldman, A; Wilt, T                                                                                                                                                                                    | 2005 |
| Immunomodulatory effects of extracorporeal photochemotherapy in systemic sclerosis                                                                                                                                       | Papp, , G, Horvath, IF, Barath, S, Gyimesi, E, Vegh, J, Szodoray, P; Zeher, M                                                                                                                                                                     | 2012 |
| Probiotics during weaning reduce the incidence of eczema                                                                                                                                                                 | West, , CE, Hammarström, ML; Hernell, O                                                                                                                                                                                                           | 2009 |
| Impact of rosiglitazone on body composition, hepatic fat, fatty acids, adipokines and glucose in persons with impaired fasting glucose or impaired glucose tolerance: a sub-study of the DREAM trial                     | Punthakee, , Z, Almérás, N, Després, JP, Dagenais, GR, Anand, SS, Hunt, DL, Sharma, AM, Jung, H, Yusuf, S; Gerstein, HC                                                                                                                           | 2014 |
| Efficacy and safety of secukinumab in patients with generalized pustular psoriasis: a 52-week analysis from phase III open-label multicenter Japanese study                                                              | Imafuku, , S, Honma, M, Okubo, Y, Komine, M, Ohtsuki, M, Morita, A, Seko, N, Kawashima, N, Ito, S, Shima, T; Nakagawa, H                                                                                                                          | 2016 |
| Optimisation of Nutrition and Medication for Acutely Admitted Older Medical Patients                                                                                                                                     | NCT03741283                                                                                                                                                                                                                                       | 2018 |
| Increased circulating follicular helper T cells with decreased programmed death-1 in chronic renal allograft rejection                                                                                                   | Shi, , J, Luo, F, Shi, Q, Xu, X, He, X; Xia, Y                                                                                                                                                                                                    | 2015 |
| Interleukin-2-activated autologous bone marrow and peripheral blood stem cells in the treatment of acute leukemia and lymphoma                                                                                           | Margolin, , KA, Van Besien, K, Wright, C, Niland, J, Champlin, R, Fung, HC, Kashyap, A, Molina, A, Nademance, AP, O'Donnell, MR, Parker, P, Smith, E, Spielberger, R, Somlo, G, Snyder, D, Stein, A, Woo, D, Thomas, M, Sniecinski, I; Forman, SJ | 1999 |
| Efficacy of a Triptan in the Treatment of Hostility and Aggression Among Convicts With a Psychiatric Treatment Order                                                                                                     | NCT00282165                                                                                                                                                                                                                                       | 2006 |
| A phase I, randomized study of combined IL-2 and therapeutic immunisation with antiretroviral therapy                                                                                                                    | Hardy, , GAD, Imami, N, Nelson, MR, Sullivan, AK, Moss, R, Aasa-Chapman, MMI, Gazzard, B; Gotch, FM                                                                                                                                               | 2007 |
| Nebulized budesonide in the treatment of exacerbations of chronic obstructive pulmonary disease: efficacy, safety, and effects on the serum levels of soluble differentiation molecules                                  | Makarova, , EV, Varvarina, GN, Menkov, NV, Czapaeva, MY, Lazareva, ES, Kazatskaya, ZA, Novikov, VV; Karaulov, AV                                                                                                                                  | 2016 |
| Therapeutic effect of paroxetine on patients with early poststroke depression and the serum interleukins                                                                                                                 | Yang, , J, Zhao, X-H, Zhu, Y-P, Bai, Q-K, Chen, J, Xia, W-Y, Chen, L-J; Lin, T-S                                                                                                                                                                  | 2011 |
| Randomized study of recombinant interleukin-2 after autologous bone marrow transplantation for acute leukemia in first complete remission                                                                                | Blaise, , D, Attal, M, Reiffers, J, Michallet, M, Bellanger, C, Pico, JL, Stoppa, AM, Payen, C, Marit, G, Bouabdallah, R, Sotto, JJ, Rossi, JF, Brandely, M, Hercend, T; Maraninchi, D                                                            | 2000 |
| Etanercept, mycophenolate, denileukin, or pentostatin plus corticosteroids for acute graft-versus-host disease: a randomized phase 2 trial from the Blood and Marrow Transplant Clinical Trials Network                  | Alousi, , AM, Weisdorf, DJ, Logan, BR, Bolaños-Meade, J, Carter, S, Difronzo, N, Pasquini, M, Goldstein, SC, Ho, VT, Hayes-Lattin, B, Wingard, JR, Horowitz, MM; Levine, JE                                                                       | 2009 |
| Increase of HIV-1 pro-viral DNA per million peripheral blood mononuclear cells in patients with advanced HIV disease (CD4<200 cells/mm3) receiving interleukin 2 combined with HAART versus HAART alone (ANRS-082 trial) | Delaugerre, , C, Gourelain, K, Tubiana, R, Carcelain, G, Marcelin, AG, Chouquet, C, Mouroux, M, Duvivier, C, Autran, B, Costagliola, D, Katlama, C; Calvez, V                                                                                     | 2003 |
| Results of a phase-I/II randomized, masked, placebo-controlled trial of recombinant human interleukin-11 (rhIL-11) in the treatment of subjects with active rheumatoid arthritis                                         | Moreland, , L, Gugliotti, R, King, K, Chase, W, Weisman, M, Greco, T, Fife, R, Korn, J, Simms, R, Tesser, J, Hillson, J, Caldwell, J, Schnitzer, T, Lyons, D; Schwertschlag, U                                                                    | 2001 |



|                                                                                                                                                                                                                                                                                              |                                                                                                                                                                                                                                                                                                                                                                                                                          |      |
|----------------------------------------------------------------------------------------------------------------------------------------------------------------------------------------------------------------------------------------------------------------------------------------------|--------------------------------------------------------------------------------------------------------------------------------------------------------------------------------------------------------------------------------------------------------------------------------------------------------------------------------------------------------------------------------------------------------------------------|------|
| Early pregnancy vitamin D status and risk of preeclampsia                                                                                                                                                                                                                                    | Mirzakhani, , H, Litonjua, AA, McElrath, TF, O'Connor, G, Lee-Parritz, A, Iverson, R, Macones, G, Strunk, RC, Bacharier, LB, Zeiger, R, Hollis, BW, Handy, DE, Sharma, A, Laranjo, N, Carey, V, Qiu, W, Santolini, M, Liu, S, Chhabra, D, Enquobahrie, DA, Williams, MA, Loscalzo, J; Weiss, ST                                                                                                                          | 2016 |
| Rucaparib maintenance treatment for recurrent ovarian carcinoma after response to platinum therapy (ARIEL3): a randomised, double-blind, placebo-controlled, phase 3 trial                                                                                                                   | Coleman, , RL, Oza, AM, Lorusso, D, Aghajanian, C, Oaknin, A, Dean, A, Colombo, N, Weberpals, JI, Clamp, A, Scambia, G, Leary, A, Holloway, RW, Gancedo, MA, Fong, PC, Goh, JC, O'Malley, DM, Armstrong, DK, Garcia-Donas, J, Swisher, EM, Floquet, A, Konecny, GE, McNeish, IA, Scott, CL, Cameron, T, Maloney, L, Isaacson, J, Goble, S, Grace, C, Harding, TC, Raponi, M, Sun, J, Lin, KK, Giordano, H; Ledermann, JA | 2017 |
| Effect of a single autologous cord blood infusion on beta-cell and immune function in children with new onset type 1 diabetes: a non-randomized, controlled trial                                                                                                                            | Giannopoulou, , EZ, Puff, R, Beyerlein, A, von Luetichau, I, Boerschmann, H, Schatz, D, Atkinson, M, Haller, MJ, Egger, D, Burdach, S; Ziegler, AG                                                                                                                                                                                                                                                                       | 2014 |
| Prophylactic use of low-dose interleukin-2 and the clinical outcomes of hematopoietic stem cell transplantation: a randomized study                                                                                                                                                          | Zhao, , X-Y, Zhao, X-S, Wang, Y-T, Chen, Y-H, Xu, L-P, Zhang, X-H, Han, W, Chen, H, Wang, Y, Yan, C-H, Wang, F-R, Wang, J-Z, Liu, K-Y, Chang, Y-J; Huang, X-J                                                                                                                                                                                                                                                            | 2016 |
| A phase two randomised controlled double blind trial of high dose intravenous methylprednisolone and oral prednisolone versus intravenous normal saline and oral prednisolone in individuals with leprosy type 1 reactions and/or nerve function impairment                                  | Walker, , SL, Nicholls, PG, Dhakal, S, Hawksworth, RA, Macdonald, M, Mahat, K, Ruchal, S, Hamal, S, Hagge, DA, Neupane, KD; Lockwood, DN                                                                                                                                                                                                                                                                                 | 2011 |
| A pilot study of the effect of spironolactone therapy on exercise capacity and endothelial dysfunction in pulmonary arterial hypertension: study protocol for a randomized controlled trial                                                                                                  | Elinoff, , JM, Rame, JE, Forfia, PR, Hall, MK, Sun, J, Gharib, AM, Abd-Elmoniem, K, Graninger, G, Harper, B, Danner, RL; Solomon, MA                                                                                                                                                                                                                                                                                     | 2013 |
| A phase 3 randomized trial comparing inolimomab vs usual care in steroid-resistant acute GVHD                                                                                                                                                                                                | Socié, , G, Vigouroux, S, Yakoub-Agha, I, Bay, JO, Fürst, S, Bilger, K, Suarez, F, Michallet, M, Bron, D, Gard, P, Medeghri, Z, Leher, P, Lai, C, Corn, T; Vernant, JP                                                                                                                                                                                                                                                   | 2017 |
| Pre-transplant r-bendamustine induces high rates of minimal residual disease in MCL patients: updated results of S1106: US intergroup study of a randomized phase II trial of R-HCVAD Vs. R-bendamustine followed by autologous stem cell transplants for patients with mantle cell lymphoma | Chen, , R, Li, H, Bernstein, SH, Rimsza, LM, Forman, SJ, Constine, L, Shea, TC, Cashen, AF, Blum, KA, Fenske, TS, Barr, PM, Leblanc, M, Fisher, RI, Cheson, BD, Smith, SM, Faham, M, Wilkins, J, Leonard, JP, Kahl, BS; Friedberg, JW                                                                                                                                                                                    | 2015 |
| Efficacy and safety of a monoclonal antibody recognizing interleukin-8 in COPD: a pilot study                                                                                                                                                                                                | Mahler, , DA, Huang, S, Tabrizi, M; Bell, GM                                                                                                                                                                                                                                                                                                                                                                             | 2004 |
| Inhaled interleukin-2 therapy in pulmonary metastatic renal cell carcinoma: six years of experience                                                                                                                                                                                          | Huland, , E, Heinzer, H, Mir, TS; Huland, H                                                                                                                                                                                                                                                                                                                                                                              | 1997 |
| Sarilumab plus methotrexate in patients with active rheumatoid arthritis and inadequate response to methotrexate: results of a randomized, placebo-controlled phase III trial in Japan                                                                                                       | Tanaka, , Y, Wada, K, Takahashi, Y, Hagino, O, Van Hoogstraten, H, Graham, NMH; Kameda, H                                                                                                                                                                                                                                                                                                                                | 2019 |
| Curative effect of donor lymphocyte and interleukin-2 on acute myelogenous leukemia after mixed hematopoietic stem cell transplantation                                                                                                                                                      | Wang, , C-B, Bai, H, Ou, Y-X, Pan, YZ, Zhang, Q; Xi, R                                                                                                                                                                                                                                                                                                                                                                   | 2007 |
| High dose versus low dose fludarabine in the treatment of patients with severe refractory rheumatoid arthritis                                                                                                                                                                               | Davis, , JC, Fessler, BJ, Tassioulas, IO, McInnes, IB, Yarboro, CH, Pillemer, S, Wilder, R, Fleisher, TA, Klippel, JH; Boumpas, DT                                                                                                                                                                                                                                                                                       | 1998 |
| Randomized trial of low-dose interleukin-2 vs cyclosporine A and interferon-gamma after high-dose chemotherapy with peripheral blood progenitor support in women with high-risk primary breast cancer                                                                                        | Vahdat, , LT, Cohen, DJ, Zipin, D, Lo, KS, Donovan, D, Savage, D, Tiersten, A, Nichols, G, Troxel, A; Hesdorffer, CS                                                                                                                                                                                                                                                                                                     | 2007 |
| Randomized phase II trial of BCDT [carmustine (BCNU), cisplatin, dacarbazine (DTIC) and tamoxifen] with or without interferon alpha (IFN-alpha) and interleukin (IL-2) in patients with metastatic melanoma                                                                                  | Johnston, , SR, Constenla, DO, Moore, J, Atkinson, H, A'Hern, RP, Dadian, G, Riches, PG; Gore, ME                                                                                                                                                                                                                                                                                                                        | 1998 |
| Treatment beyond progression with nivolumab in patients with recurrent or metastatic (R/M) squamous cell carcinoma of the head and neck (SCCHN) in the phase 3 checkmate 141 study: a biomarker analysis and updated clinical outcomes                                                       | Haddad, , R, Blumenschein, G, Fayette, J, Guigay, J, Colevas, AD, Licitra, L, Kasper, S, Vokes, EE, Worden, F, Saba, NF, Tahara, M, Concha-Benavente, F, Monga, M, Lynch, M, Li, L, Shaw, JW, Gillison, ML, Harrington, KJ; Ferris, RL                                                                                                                                                                                   | 2017 |
| Anti-Interleukin-31 Receptor A Antibody for Atopic Dermatitis                                                                                                                                                                                                                                | Ruzicka, , T, Hanifin, JM, Furue, M, Pulka, G, Mlynarczyk, I, Wollenberg, A, Galus, R, Etoh, T, Mihara, R, Yoshida, H, Stewart, J; Kabashima, K                                                                                                                                                                                                                                                                          | 2017 |
| PAINTER: evaluation of eribulin tolerability and correlation between a set of polymorphisms and neuropathy in patients with metastatic breast cancer                                                                                                                                         | La Verde, , N, Moretti, A, Damia, G, Paterno, E, Santini, D, Garrone, O, Fabi, A, Ciccarese, M, Cretella, E, Torri, V, Generali, D, Grasso, D, Puglisi, F, Collova, E, Roila, F, Bertolini, A, Barni, S, Vici, P, Luigi, C, Scandurra, G, Bramati, A, Dazzani, MC; Farina, G                                                                                                                                             | 2017 |
| Reduced helminth burden increases allergen skin sensitization but not clinical allergy: a randomized, double-blind, placebo-controlled trial in Vietnam                                                                                                                                      | Flohr, , C, Tuyen, LN, Quinnell, RJ, Lewis, S, Minh, TT, Campbell, J, Simmons, C, Telford, G, Brown, A, Hien, TT, Farrar, J, Williams, H, Pritchard, DI; Britton, J                                                                                                                                                                                                                                                      | 2010 |
| Efficacy and safety of sirukumab in patients with active rheumatoid arthritis refractory to anti-TNF therapy (SIRROUND-T): a randomised, double-blind, placebo-controlled, parallel-group, multinational, phase 3 study                                                                      | Aletaha, , D, Bingham, CO, Tanaka, Y, Agarwal, P, Kurrasch, R, Tak, PP; Popik, S                                                                                                                                                                                                                                                                                                                                         | 2017 |
| The mitochondrial pharmacogenomics of haplogroup T: mTND2*LHON4917G and antiretroviral therapy-associated peripheral neuropathy                                                                                                                                                              | Canter, , JA, Haas, DW, Kallianpur, AR, Ritchie, MD, Robbins, GK, Shafer, RW, Clifford, DB, Murdock, DG; Hulgán, T                                                                                                                                                                                                                                                                                                       | 2008 |
| A pilot exercise intervention to improve lower extremity functioning in peripheral arterial disease unaccompanied by intermittent claudication                                                                                                                                               | McDermott, , MM, Tiukinhoy, S, Greenland, P, Liu, K, Pearce, WH, Guralnik, JM, Unterreiner, S, Gluckman, TJ, Criqui, MH; Ferrucci, L                                                                                                                                                                                                                                                                                     | 2004 |
| HAT-01, a novel herbal preparation, is superior to corticosteroids and pimecrolimus for the treatment of moderate to severe atopic dermatitis                                                                                                                                                | Alex, , P, Payne, A, Desai, A, Centola, M, Thomas, S; Yesudas, T                                                                                                                                                                                                                                                                                                                                                         | 2013 |

|                                                                                                                                                                                                                                                                              |                                                                                                                                                                                                                                                                                                                             |      |
|------------------------------------------------------------------------------------------------------------------------------------------------------------------------------------------------------------------------------------------------------------------------------|-----------------------------------------------------------------------------------------------------------------------------------------------------------------------------------------------------------------------------------------------------------------------------------------------------------------------------|------|
| Deciphering antitumour response and resistance with intratumour heterogeneity (DARWIN II)                                                                                                                                                                                    | Hiley, , CT, Ahmad, T, Jamal-Hanjani, M, Abbosh, C, Ngai, Y, Hackshaw, A, Patterson, P, Bajjal, S, Nicolson, M, Lester, JF, Krebs, M, Ottensmeier, CHH, Fennell, DA, Schmid, P, Ezhil, M, Danson, S, Steele, NL, Middleton, GW, Dive, C; Swanton, C                                                                         | 2017 |
| Robust mucosal-homing antibody-secreting B cell responses induced by intramuscular administration of adjuvanted bivalent human norovirus-like particle vaccine                                                                                                               | Sundararajan, , A, Sangster, MY, Frey, S, Atmar, RL, Chen, WH, Ferreira, J, Bargatz, R, Mendelman, PM, Treanor, JJ; Topham, DJ                                                                                                                                                                                              | 2015 |
| Anti-interleukin-17A monoclonal antibody secukinumab in treatment of ankylosing spondylitis: a randomised, double-blind, placebo-controlled trial                                                                                                                            | Baeten, , D, Baraliakos, X, Braun, J, Sieper, J, Emery, P, van der Heijde, D, McInnes, I, van Laar, JM, Landewé, R, Wordsworth, P, Wollenhaupt, J, Kellner, H, Paramarta, J, Wei, J, Brachet, A, Bek, S, Laurent, D, Li, Y, Wang, YA, Bertolino, AP, Gsteiger, S, Wright, AM; Hueber, W                                     | 2013 |
| Lebrikizumab in moderate-to-severe asthma: pooled data from two randomised placebo-controlled studies                                                                                                                                                                        | Hanania, , NA, Noonan, M, Corren, J, Korenblat, P, Zheng, Y, Fischer, SK, Cheu, M, Putnam, WS, Murray, E, Scheerens, H, Holweg, CT, Maciucă, R, Gray, S, Doyle, R, McClintock, D, Olsson, J, Matthews, JG; Yen, K                                                                                                           | 2015 |
| Safety and Immunomodulatory Effects of Three Probiotic Strains Isolated from the Feces of Breast-Fed Infants in Healthy Adults: SETOPROB Study                                                                                                                               | Plaza-Diaz, , J, Gomez-Llorente, C, Campana-Martin, L, Matencio, E, Ortuno, I, Martinez-Silla, R, Gomez-Gallego, C, Periago, MJ, Ros, G, Chenoll, E, Genoves, S, Casinos, B, Silva, A, Corella, D, Portoles, O, Romero, F, Ramon, D, Perez de la Cruz, A, Gil, A; Fontana, L                                                | 2013 |
| Peripheral blood SIRT1 mRNA levels in depression and treatment with electroconvulsive therapy                                                                                                                                                                                | McGrory, , CL, Ryan, KM, Kolshus, E, Finnegan, M; McLoughlin, DM                                                                                                                                                                                                                                                            | 2018 |
| Post-transplant sCD30 and neopterin as predictors of chronic allograft nephropathy: impact of different immunosuppressive regimens                                                                                                                                           | Weimer, , R, Süsal, C, Yildiz, S, Staak, A, Pelzl, S, Renner, F, Dietrich, H, Daniel, V, Kamali-Ernst, S, Ernst, W, Padberg, W; Opelz, G                                                                                                                                                                                    | 2006 |
| Anti-inflammatory effects of montelukast in mild cystic fibrosis                                                                                                                                                                                                             | Schmitt-Grohé, , S, Eickmeier, O, Schubert, R, Bez, C; Zielen, S                                                                                                                                                                                                                                                            | 2002 |
| Efficacy and safety of ixekizumab at week 52 in biologic-naïve patients with active psoriatic arthritis (SPIRIT-P1)                                                                                                                                                          | Lespessailles, , E, Kirkham, B, Nebro, A, Alonso, R, Strehblow, C, Inciarte, J, Porsdal, V, Garcia, M, Kurzawa, M, Sapin, C, Geusens, P, Goupille, P; Tahir, H                                                                                                                                                              | 2018 |
| A Phase 2/3 Multicenter, Randomized, Open-Label Study to Compare the Efficacy and Safety of Lenalidomide Versus Investigator's Choice in Patients with Relapsed or Refractory Diffuse Large B-Cell Lymphoma                                                                  | Czuczman, , MS, Trněný, M, Davies, A, Rule, S, Linton, KM, Wagner-Johnston, N, Gascoyne, RD, Slack, GW, Brousset, P, Eberhard, DA, Hernandez-Ilizaliturri, FJ, Salles, G, Witzig, TE, Zinzani, PL, Wright, GW, Staudt, LM, Yang, Y, Williams, PM, Lih, CJ, Russo, J, Thakurta, A, Hagner, P, Fustier, P, Song, D; Lewis, ID | 2017 |
| Simvastatin in Secondary Progressive Multiple Sclerosis                                                                                                                                                                                                                      | NCT03896217                                                                                                                                                                                                                                                                                                                 | 2019 |
| Increased IL-17A expression in temporal artery lesions is a predictor of sustained response to glucocorticoid treatment in patients with giant-cell arteritis                                                                                                                | Espigol-Frigole, , G, Corbera-Bellalta, M, Planas-Rigol, E, Lozano, E, Segarra, M, Garcia-Martinez, A, Prieto-Gonzalez, S, Hernandez-Rodriguez, J, Grau, JM, Rahman, MU; Cid, MC                                                                                                                                            | 2013 |
| Selective capacity of metreleptin administration to reconstitute CD4+ T-cell number in females with acquired hypoleptinemia                                                                                                                                                  | Matarese, , G, La Rocca, C, Moon, HS, Huh, JY, Brinkoetter, MT, Chou, S, Perna, F, Greco, D, Kilim, HP, Gao, C, Arampatzis, K, Wang, Z; Mantzoros, CS                                                                                                                                                                       | 2013 |
| Phase II study of eribulin in combination with gemcitabine for the treatment of patients with locally advanced or metastatic triple negative breast cancer: ERIge trial on behalf of the Gruppo Oncologico Italiano di Ricerca Clinica (GOIRC)                               | Musolino, , A, Porzio, R, Rubino, D, Frassoldati, A, Caldara, A, Schirone, A, Gori, S, Piacentini, F, Berardi, R, Brandes, AA, Cavazzini, G, Foglietta, J, Villa, F, Pellegrino, B, Camisa, R, Todeschini, R, Tognetto, M, Naldi, N, Baldari, D; Montemurro, F                                                              | 2017 |
| Siltuximab for multicentric Castleman's disease: a randomised, double-blind, placebo-controlled trial                                                                                                                                                                        | van Rhee, , F, Wong, RS, Munshi, N, Rossi, JF, Ke, XY, Fossá, A, Simpson, D, Capra, M, Liu, T, Hsieh, RK, Goh, YT, Zhu, J, Cho, SG, Ren, H, Cavet, J, Bandekar, R, Rothman, M, Puchalski, TA, Reddy, M, van de Velde, H, Vermeulen, J; Casper, C                                                                            | 2014 |
| Balance of autonomic nervous system predicts who benefits from a self-management intervention program for irritable bowel syndrome                                                                                                                                           | Jarrett, , ME, Cain, KC, Barney, PG, Burr, RL, Naliboff, BD, Shulman, R, Zia, J; Heitkemper, MM                                                                                                                                                                                                                             | 2016 |
| Immunity and clinical efficacy of an inactivated enterovirus 71 vaccine in healthy Chinese children: a report of further observations                                                                                                                                        | Liu, , L, Mo, Z, Liang, Z, Zhang, Y, Li, R, Ong, KC, Wong, KT, Yang, E, Che, Y, Dong, C, Feng, M, Pu, J, Liao, Y, Jiang, L, Tan, SH, David, P, Huang, T, Zhou, Z, Wang, X, Xia, J, Guo, L, Wang, L, Xie, Z, Cui, W, Mao, Q, Liang, Y, Zhao, H, Na, R, Cui, P, Shi, H, Wang, J; Li, Q                                        | 2015 |
| Ixekizumab, an interleukin-17A specific monoclonal antibody, for the treatment of patients with active psoriatic arthritis: results from the 24-week randomised, double-blind, placebo-controlled and active (adalimumab)-controlled period of the phase III trial SPIRIT-P1 | Mease, , PJ, van der Heijde, D, Ritchlin, CT, Okada, M, Cuchacovich, RS, Shuler, CL, Lin, CY, Braun, DK, Lee, CH; Gladman, DD                                                                                                                                                                                               | 2017 |
| Ixabepilone administered weekly or every three weeks in HER2-negative metastatic breast cancer patients; a randomized non-comparative phase II trial                                                                                                                         | Fountzilas, , G, Kotoula, V, Pectasides, D, Kouvatseas, G, Timotheadou, E, Bobos, M, Mavropoulou, X, Papadimitriou, C, Vrettou, E, Raptou, G, Koutras, A, Razis, E, Bafaloukos, D, Samantas, E, Pentheroudakis, G; Skarlos, DV                                                                                              | 2013 |
| Pilot study of interferon-alpha-ribavirin-interleukin-2 for treatment of nonresponder patients with severe liver disease infected by hepatitis C virus genotype 1                                                                                                            | Alric, , L, Thebault, S, Peron, JM, Balard, P, Metivier, S, Pipy, B, Izopet, J; Vinel, JP                                                                                                                                                                                                                                   | 2006 |
| Pharmacokinetic, pharmacodynamic and clinical effects of a humanized IgG1 anti-CD4 monoclonal antibody in the peripheral blood and synovial fluid of rheumatoid arthritis patients                                                                                           | Choy, , EH, Connolly, DJ, Rapson, N, Jeal, S, Brown, JC, Kingsley, GH, Panayi, GS; Johnston, JM                                                                                                                                                                                                                             | 2000 |
| Oral 4-aminosalicylic acid versus 5-aminosalicylic acid slow release tablets. Double blind, controlled pilot study in the maintenance treatment of Crohn's ileocolitis                                                                                                       | Schreiber, , S, Howaldt, S; Raedler, A                                                                                                                                                                                                                                                                                      | 1994 |

|                                                                                                                                                                                                                                                                                                                                                                          |                                                                                                                                                                                                                                                               |      |
|--------------------------------------------------------------------------------------------------------------------------------------------------------------------------------------------------------------------------------------------------------------------------------------------------------------------------------------------------------------------------|---------------------------------------------------------------------------------------------------------------------------------------------------------------------------------------------------------------------------------------------------------------|------|
| Secukinumab efficacy and safety in Japanese patients with moderate-to-severe plaque psoriasis: subanalysis from ERASURE, a randomized, placebo-controlled, phase 3 study                                                                                                                                                                                                 | Ohtsuki, , M, Morita, A, Abe, M, Takahashi, H, Seko, N, Karpov, A, Shima, T, Papavassilis, C; Nakagawa, H                                                                                                                                                     | 2014 |
| NEURAPRO-E study protocol: a multicentre randomized controlled trial of omega-3 fatty acids and cognitive-behavioural case management for patients at ultra high risk of schizophrenia and other psychotic disorders                                                                                                                                                     | Markulev, , C, McGorry, PD, Nelson, B, Yuen, HP, Schaefer, M, Yung, AR, Thompson, A, Berger, G, Mossaheb, N, Schlogelhofer, M, Smesny, S, de Haan, L, Riecher-Rossler, A, Nordentoft, M, Chen, EYH, Verma, S, Hickie, I; Amminger, GP                         | 2017 |
| Total body irradiation, etoposide, cyclophosphamide, and autologous peripheral blood stem-cell transplantation followed by randomization to therapy with interleukin-2 versus observation for patients with non-Hodgkin lymphoma: results of a phase 3 randomized trial by the Southwest Oncology Group (SWOG 9438)                                                      | Thompson, , JA, Fisher, RI, Leblanc, M, Forman, SJ, Press, OW, Unger, JM, Nademance, AP, Stiff, PJ, Petersdorf, SH; Fefer, A                                                                                                                                  | 2008 |
| Double blind clinical trial in a series of 115 patients with seborrheic dermatitis: prevention of relapses using a topical modulator of Toll like receptor 2                                                                                                                                                                                                             | Ionescu, , MA, Baroni, A, Brambilla, L, Cannavò, SP, Cristaudo, A, Vedove, CD, Frasca, M, Girolomoni, G, Gneccchi, L, Peris, K, Trifirò, C, Matta, AM; Robert, G                                                                                              | 2011 |
| Acute peripheral administration of synthetic human GLP-1 (7-36 amide) decreases circulating IL-6 in obese patients with type 2 diabetes mellitus: a potential role for GLP-1 in modulation of the diabetic pro-inflammatory state?                                                                                                                                       | Daousi, , C, Pinkney, JH, Cleator, J, Wilding, JP; Ranganath, LR                                                                                                                                                                                              | 2013 |
| The contribution of skin and joint improvements to the health-related quality of life of patients with active psoriatic arthritis                                                                                                                                                                                                                                        | Kavanaugh, , A, Gottlieb, AB, Morita, A, Merola, J, Birt, J, Lin, C-Y, Shuler, C; Thaci, D                                                                                                                                                                    | 2017 |
| Recombinant human interleukin-1 receptor type I in the treatment of patients with active rheumatoid arthritis                                                                                                                                                                                                                                                            | Drevlow, , BE, Lovis, R, Haag, MA, Sinacore, JM, Jacobs, C, Blosche, C, Landay, A, Moreland, LW; Pope, RM                                                                                                                                                     | 1996 |
| ImmuniCell® in patients with advanced cancers                                                                                                                                                                                                                                                                                                                            | ISRCTN26113637                                                                                                                                                                                                                                                | 2016 |
| Effects Of extra-fine particle HFA-becLomethasone (HFA-QVAR) Versus course particle treatment In smokers and ex-smokers with Asthma                                                                                                                                                                                                                                      | EUCTR2012-005350-39-NL                                                                                                                                                                                                                                        | 2013 |
| Impact of daclizumab HYP monotherapy on healthrelated quality of life in relapsing-remitting multiple sclerosis patients                                                                                                                                                                                                                                                 | Selmaj, , K, Havrdova, E, Gold, R, Greenberg, S, Phillips, G, Umans, K; Elkins, J                                                                                                                                                                             | 2012 |
| Two-year clinical response to brodalumab, an anti-il-17 receptor antibody, in patients with psoriatic arthritis                                                                                                                                                                                                                                                          | Mease, , P, Genovese, MC, Greenwald, MW, Ritchlin, CT, Beaulieu, A, Deodhar, A, Newmark, R, Feng, J, Erond, N; Nirula, A                                                                                                                                      | 2015 |
| SATURN: Effect of secukinumab in the treatment of psoriatic arthritis                                                                                                                                                                                                                                                                                                    | ISRCTN16488621                                                                                                                                                                                                                                                | 2016 |
| A randomized, double-blind, placebo-controlled, parallel group study to evaluate the effects of a 4-week treatment of 15 mg b.i.d BIBW 2948 BS (inhalation powder, hard capsule for HandiHaler®) on epithelial mucin stores and the safety and efficacy in COPD patients with symptoms associated with chronic bronchitis - Effects of BIBW 1948 on epithelial mucin     | EUCTR2006-001975-40-DE                                                                                                                                                                                                                                        | 2006 |
| A Phase I/IIa Study of Low Dose Subcutaneous Interleukin-2 (IL-2) for Treatment of Refractory Chronic Graft Versus Host Disease (GVHD)                                                                                                                                                                                                                                   | JPRN-UMIN000022253                                                                                                                                                                                                                                            | 2016 |
| A Study Comparing GSK2118436 to Dacarbazine (DTIC) in Previously Untreated Subjects With BRAF Mutation Positive Advanced (Stage III) or Metastatic (Stage IV) Melanoma                                                                                                                                                                                                   | ACTRN12611000311954                                                                                                                                                                                                                                           | 2011 |
| Effect of Borago officinalis extract on moderate persistent asthma                                                                                                                                                                                                                                                                                                       | IRCT201408052695N6                                                                                                                                                                                                                                            | 2014 |
| The effect of laser therapy on gingival inflammation                                                                                                                                                                                                                                                                                                                     | IRCT2017011620523N2                                                                                                                                                                                                                                           | 2017 |
| Abatacept to Silence anti-Citrullinated protein Antibody-expressing B cells in Rheumatoid Arthritis                                                                                                                                                                                                                                                                      | EUCTR2017-002878-38-NL                                                                                                                                                                                                                                        | 2017 |
| Efficacy and safety of guselkumab in patients with psoriasis who have an inadequate response to ustekinumab: results of the randomized, double-blind, phase III NAVIGATE trial                                                                                                                                                                                           | Langley, , RG, Tsai, TF, Flavin, S, Song, M, Randazzo, B, Wasfi, Y, Jiang, J, Li, S; Puig, L                                                                                                                                                                  | 2018 |
| Maintenance treatment with mirikizumab, a p19-directed IL-23 antibody: 52-week results in patients with moderately-to-severely active ulcerative colitis                                                                                                                                                                                                                 | Geert, , G, D'Haens, R, Sandborn, WJ, Ferrante, M, Bhandari, BR, Berliba, E, Hibi, T, Tuttle, J, Canavan, JB, Friedrich, S, Durante, M, Arora, V; Feagan, B                                                                                                   | 2019 |
| Multicenter, Open-label, Exploratory Phase I Pilot Study to Investigate Safety, Pharmacodynamics and Pharmacokinetics of Immunological Effects and Activity of Combining Multiple Doses of IMAB362 With Immunomodulation (Zoledronic Acid, Interleukin-2) in Patients With Advanced Adenocarcinoma of the Stomach, the Lower Esophagus or the Gastro-esophageal Junction | DRKS00005206                                                                                                                                                                                                                                                  | 2014 |
| Efficacy of Symptom-driven treatment with inhaled budesonide/formoterol versus fixed dose fluticasone/salmeterol in COPD                                                                                                                                                                                                                                                 | EUCTR2014-001563-12-NL                                                                                                                                                                                                                                        | 2015 |
| A PHASE II STUDY OF ATEZOLIZUMAB WITH RITUXIMAB, GEMCITABINE AND OXALIPLATIN IN PATIENTS WITH RELAPSED OR REFRACTORY DIFFUSE LARGE B-CELL LYMPHOMA WHO ARE NOT CANDIDATES FOR HIGH-DOSE THERAPY                                                                                                                                                                          | EUCTR2016-002654-21-GB                                                                                                                                                                                                                                        | 2018 |
| Effect of tralokinumab, an interleukin-13 neutralising monoclonal antibody, on eosinophilic airway inflammation in uncontrolled moderate-to-severe asthma (MESOS): a multicentre, double-blind, randomised, placebo-controlled phase 2 trial                                                                                                                             | Russell, , RJ, Chachi, L, FitzGerald, JM, Backer, V, Olivenstein, R, Titlestad, IL, Ulrik, CS, Harrison, T, Singh, D, Chaudhuri, R, Leaker, B, McGarvey, L, Siddiqui, S, Wang, M, Braddock, M, Nordenmark, LH, Cohen, D, Parikh, H, Colice, G; Brightling, CE | 2018 |
| A study to investigate the effects of lumicitabine (JNJ-64041575) in hospitalized adults infected with human metapneumovirus                                                                                                                                                                                                                                             | EUCTR2017-001696-22-PL                                                                                                                                                                                                                                        | 2018 |
| Effect of vitamin D and calcium supplementation on serum levels of hormones affecting postpartum depression                                                                                                                                                                                                                                                              | IRCT2016111016123N12                                                                                                                                                                                                                                          | 2017 |

|                                                                                                                                                                                                                                                                                       |                                                                                                                                                                                                                                                             |      |
|---------------------------------------------------------------------------------------------------------------------------------------------------------------------------------------------------------------------------------------------------------------------------------------|-------------------------------------------------------------------------------------------------------------------------------------------------------------------------------------------------------------------------------------------------------------|------|
| Dupilumab with concomitant topical corticosteroid treatment in adults with atopic dermatitis with an inadequate response or intolerance to ciclosporin A or when this treatment is medically inadvisable: a placebo-controlled, randomized phase III clinical trial (LIBERTY AD CAFÉ) | de Bruin-Weller, , M, Thaci, D, Smith, CH, Reich, K, Cork, MJ, Radin, A, Zhang, Q, Akinlade, B, Gadkari, A, Eckert, L, Hultsch, T, Chen, Z, Pirozzi, G, Graham, NMH; Shumel, B                                                                              | 2018 |
| Effect of Propolis on moderate asthma                                                                                                                                                                                                                                                 | IRCT201209302695N4                                                                                                                                                                                                                                          | 2015 |
| Individual Therapy by Gene Expression for Colon Cancer Patients                                                                                                                                                                                                                       | EUCTR2012-001307-20-ES                                                                                                                                                                                                                                      | 2012 |
| MAINTENANCE TREATMENT WITH MIRIKIZUMAB, A P19-DIRECTED IL-23 ANTIBODY: 52-WEEK RESULTS IN PATIENTS WITH MODERATE-TO-TOSEVERELY ACTIVE ULCERATIVE COLITIS                                                                                                                              | D'Haens, , GR, Sandborn, WJ, Ferrante, M, Bhandari, BR, Berliba, E, Hibi, T, Tuttle, J, Friedrich, S, Durante, M, Arora, V, Feagan, BG; Canavan, J                                                                                                          | 2019 |
| Efficacy and safety of dupilumab in adults with moderate-to-severe atopic dermatitis inadequately controlled by topical treatments: a randomised, placebo-controlled, dose-ranging phase 2b trial                                                                                     | Thaçi, , D, Simpson, EL, Beck, LA, Bieber, T, Blauvelt, A, Papp, K, Soong, W, Worm, M, Szepletowski, JC, Sofen, H, Kawashima, M, Wu, R, Weinstein, SP, Graham, NM, Pirozzi, G, Teper, A, Sutherland, ER, Mastey, V, Stahl, N, Yancopoulos, GD; Ardeleanu, M | 2016 |
| The effect of Docosahexaenoic acid on factors influencing vascular thickness and function in diabetic patients                                                                                                                                                                        | IRCT2013071213964N1                                                                                                                                                                                                                                         | 2013 |
| A trial of bortezomib with R-CHOP for diffuse large B cell lymphoma (DLBCL)                                                                                                                                                                                                           | EUCTR2010-022422-32-GB                                                                                                                                                                                                                                      | 2010 |
| A Phase II repeated dose, randomized and blinded trial of CIM331 in patients with eczema in whom products applied to the skin do not provide sufficient relief or produce side effects                                                                                                | EUCTR2013-002470-46-GB                                                                                                                                                                                                                                      | 2013 |
| Effect of angiotensin-converting enzyme inhibitors on systemic inflammation and myocardial sympathetic innervation in normotensive patients with type two diabetes mellitus                                                                                                           | ISRCTN76608550                                                                                                                                                                                                                                              | 2007 |
| Exclusive nutritional therapy and intestinal homeostasis in pediatric inflammatory bowel disease                                                                                                                                                                                      | DRKS00003548                                                                                                                                                                                                                                                | 2012 |
| AMG 714 (ANTI-IL-15 MAB) AMELIORATES THE EFFECTS OF GLUTEN CONSUMPTION IN CELIAC DISEASE: a PHASE 2A, RANDOMIZED, DOUBLE-BLIND, PLACEBO-CONTROLLED STUDY EVALUATING AMG 714 IN ADULT PATIENTS WITH CELIAC DISEASE EXPOSED TO A HIGH-DOSE GLUTEN CHALLENGE                             | Lahdeaho, , M-L, Scheinin, M, Pesu, M, Kivela, L, Lovro, Z, Keisala, J, Leon, F; Maki, M                                                                                                                                                                    | 2018 |
| Comparing peripherally inserted central catheter (PICC) materials to prevent infections and blood clots: a randomized controlled trial                                                                                                                                                | ACTRN12619000022167                                                                                                                                                                                                                                         | 2019 |
| BASELINE CHARACTERISTICS AND CORRELATION BETWEEN DYSPHAGIA AND DISEASE ACTIVITY IN PATIENTS WITH EOSINOPHILIC ESOPHAGITIS IN A RANDOMIZED, PLACEBO-CONTROLLED, PHASE 2 DUPILUMAB TRIAL                                                                                                | Collins, , MH, Hirano, I, Dellon, ES, Peterson, KA, Chehade, M, Schoepfer, AM, Safroneeva, E, Rothenberg, ME, Falk, GW, Assouline-Dayana, Y, Chen, Z, Pirozzi, G, Mannent, L, Graham, NM, Ruddy, M, Hamilton, JD; Radin, A                                  | 2018 |
| Safety and Pharmacology of NOX-H94 in renal dialysis patients with ESA resistant anaemia                                                                                                                                                                                              | EUCTR2013-003585-14-AT                                                                                                                                                                                                                                      | 2015 |
| Overlap/switch to adefovir monotherapy for lamivudine-resistant patients who responded to combination therapy: a pilot controlled study                                                                                                                                               | Aizawa, , M, Tsubota, A, Fujise, K, Sato, K, Baba, M, Takamatsu, M, Namiki, Y, Ohkusa, T; Tajiri, H                                                                                                                                                         | 2010 |
| The V-QUIN MDR TRIAL: a randomized controlled trial of six months of daily levofloxacin for the prevention of tuberculosis among household contacts of patients with multi-drug resistant tuberculosis                                                                                | ACTRN12616000215426                                                                                                                                                                                                                                         | 2016 |
| Shockwave treatment for heart failure                                                                                                                                                                                                                                                 | EUCTR2013-004333-33-GB                                                                                                                                                                                                                                      | 2013 |
| The effect of vitamin D3 and calcium supplementation in treatment of postpartum depression                                                                                                                                                                                            | IRCT2016091416123N9                                                                                                                                                                                                                                         | 2017 |
| Dupilumab efficacy and safety in adults with uncontrolled persistent asthma despite use of medium-to-high-dose inhaled corticosteroids plus a long-acting $\beta_2$ agonist: a randomised double-blind placebo-controlled pivotal phase 2b dose-ranging trial                         | Wenzel, , S, Castro, M, Corren, J, Maspero, J, Wang, L, Zhang, B, Pirozzi, G, Sutherland, ER, Evans, RR, Joish, VN, Eckert, L, Graham, NM, Stahl, N, Yancopoulos, GD, Louis-Tisserand, M; Teper, A                                                          | 2016 |
| The analysis of Th2 cell subsets in house dust mite allergic rhinitis patients after sublingual immunotherapy                                                                                                                                                                         | Ihara, , F, Sakurai, D; Okamoto, Y                                                                                                                                                                                                                          | 2019 |
| Randomized trial of treatment with cisplatin and interleukin-2 either alone or in combination with interferon-alpha-2a in patients with metastatic melanoma: a Federation Nationale des Centres de Lutte Contre le Cancer Multicenter, parallel study                                 | Dorval, , T, Négrier, S, Chevreau, C, Avril, MF, Baume, D, Cupissol, D, Oskam, R, de Peuter, R, Vinke, J, Herrera, A; Escudier, B                                                                                                                           | 1999 |
| INTRAVENOUS IMMUNOGLOBULIN HUMAN FOR THE TREATMENT OF ABORTION                                                                                                                                                                                                                        | EUCTR2014-005419-18-ES                                                                                                                                                                                                                                      | 2016 |
| Implementation of Individualized Medicine: education, Prediction and Treatment                                                                                                                                                                                                        | ISRCTN90092922                                                                                                                                                                                                                                              | 2014 |
| Differential lipogenic effects of cilostazol and pentoxifylline in patients with intermittent claudication: potential role for interleukin-6                                                                                                                                          | Lee, , TM, Su, SF, Hwang, JJ, Tseng, CD, Chen, MF, Lee, YT; Wang, SS                                                                                                                                                                                        | 2001 |
| Anti-TNF discontinuation in patients with inflammatory bowel disease                                                                                                                                                                                                                  | EUCTR2015-001410-10-ES                                                                                                                                                                                                                                      | 2016 |
| Proof-of-Concept study to assess the efficacy, safety and tolerability of SAR440340 (anti-IL-33 mAb) in patients with moderate-to-severe chronic obstructive pulmonary disease (COPD)                                                                                                 | EUCTR2017-003290-34-PL                                                                                                                                                                                                                                      | 2018 |
| Adipose tissue-derived mesenchymal stromal cells as part of therapy for chronic graft-versus-host disease: a phase I/II study                                                                                                                                                         | Jurado, , M, De La Mata, C, Ruiz-García, A, López-Fernández, E, Espinosa, O, Remigia, MJ, Moratalla, L, Gotteris, R, García-Martín, P, Ruiz-Cabello, F, Garzón, S, Pascual, MJ, Espigado, I; Solano, C                                                      | 2017 |
| Comparison of 2 and 4 doses hydrocortison substitution with regard to plasma concentration and quality of life. - CHEQ                                                                                                                                                                | EUCTR2005-001768-30-SE                                                                                                                                                                                                                                      | 2005 |

|                                                                                                                                                                                                                                     |                                                                                                                                                                                                                                        |      |
|-------------------------------------------------------------------------------------------------------------------------------------------------------------------------------------------------------------------------------------|----------------------------------------------------------------------------------------------------------------------------------------------------------------------------------------------------------------------------------------|------|
| An open label multi facilities cooperation randomized control trial to verify renoprotective effects of pioglitazone therapy in diabetic nephropathy                                                                                | JPRN-UMIN000001126                                                                                                                                                                                                                     | 2008 |
| Effect of Empagliflozin on Endothelial Function in Cardiovascular High Risk Diabetes Mellitus: multi-Center Placebo-Controlled Double-Blind Randomized Trial                                                                        | JPRN-UMIN000024502                                                                                                                                                                                                                     | 2016 |
| Evaluation of the efficacy of high throughput genome analysis as a therapeutic decision tool for patients with metastatic non small cell lung cancer - SAFIR 02 Lung                                                                | EUCTR2013-001653-27-FR                                                                                                                                                                                                                 | 2015 |
| A study to evaluate the effectiveness and safety of the study drug, when patients are given dosage of ILT-101 with active moderate to severe systemic lupus erythematosus(SLE)                                                      | EUCTR2016-000488-17-PT                                                                                                                                                                                                                 | 2016 |
| A Phase 2b study for adults hospitalized with Respiratory Syncytial Virus                                                                                                                                                           | EUCTR2016-001653-40-NL                                                                                                                                                                                                                 | 2016 |
| A study to investigate the effects of lumicitabine (JNJ-64041575) in hospitalized infants and children infected with Respiratory Syncytial Virus (RSV)                                                                              | EUCTR2017-001862-56-PT                                                                                                                                                                                                                 | 2017 |
| A Randomized, Placebo-Controlled, Phase 1b/2 Study of Rilotumumab or Ganitumab in Combination With Platinum-Based Chemotherapy as First-Line Treatment for Extensive-Stage Small-Cell Lung Cancer                                   | Glisson, , B, Besse, B, Dols, MC, Dubey, S, Schupp, M, Jain, R, Jiang, Y, Menon, H, Nackaerts, K, Orlov, S, Paz-Ares, L, Ramlau, R, Tang, R, Zhang, Y; Zhu, M                                                                          | 2017 |
| Selumetinib plus dacarbazine versus placebo plus dacarbazine as first-line treatment for BRAF-mutant metastatic melanoma: a phase 2 double-blind randomised study                                                                   | Robert, , C, Dummer, R, Gutzmer, R, Lorigan, P, Kim, KB, Nyakas, M, Arance, A, Liszkay, G, Schadendorf, D, Cantarini, M, Spencer, S; Middleton, MR                                                                                     | 2013 |
| Randomized phase Ib/II trial of rilotumumab or ganitumab with panitumumab versus panitumumab alone in patients with wild-type KRAS metastatic colorectal cancer                                                                     | Van Cutsem, , E, Eng, C, Nowara, E, Swieboda-Sadlej, A, Tebbutt, NC, Mitchell, E, Davidenko, I, Stephenson, J, Elez, E, Prenen, H, Deng, H, Tang, R, McCaffery, I, Oliner, KS, Chen, L, Gansert, J, Loh, E, Smethurst, D; Tabernero, J | 2014 |
| Effect of Anti-diabetic Drugs on Glycemic Variability                                                                                                                                                                               | NCT02925559                                                                                                                                                                                                                            | 2016 |
| Comparative Study of Strategies for Management of Duchenne Myopathy (DM)                                                                                                                                                            | NCT03633565                                                                                                                                                                                                                            | 2018 |
| Transcranial Magnetic Stimulation for the Treatment of Veterans With Alcohol Use Disorders                                                                                                                                          | NCT03191266                                                                                                                                                                                                                            | 2017 |
| IFN- $\gamma$ analysis in blood and tissue as a potential prognostic and/or predictive biomarker                                                                                                                                    | Kallinteris, , N, Horn, L, Tang, M, Guenne, T, Yin, S, Lai, J, Shan, J; Sanborn, RE                                                                                                                                                    | 2017 |
| Fecal microbial transplantation in multiple sclerosis: trial design                                                                                                                                                                 | Wing, , AC; Kremenchutzky, M                                                                                                                                                                                                           | 2018 |
| Efficacy, safety, and tolerability of lacosamide in patients with gain-of-function Nav1.7 mutation-related small fiber neuropathy: study protocol of a randomized controlled trial-the LENSS study                                  | de Greef, , BT, Merkies, IS, Geerts, M, Faber, CG; Hoeijmakers, JG                                                                                                                                                                     | 2016 |
| Efficacy of Epratuzumab, an Anti-CD22 Monoclonal IgG Antibody, in Systemic Lupus Erythematosus Patients With Associated Sjogren's Syndrome: post Hoc Analyses From the EMBODY Trials                                                | Gottenberg, , J-E, Dörner, T, Bootsma, H, Devauchelle-Pensec, V, Bowman, SJ, Mariette, X, Bartz, H, Oortgiesen, M, Shock, A, Koetse, W, Galateau, C, Bongardt, S, Wegener, WA, Goldenberg, DM, Meno-Tetang, G, Kosutic, G; Gordon, C   | 2018 |
| Efficacy and safety of bilastine in Japanese patients with chronic spontaneous urticaria: a multicenter, randomized, double-blind, placebo-controlled, parallel-group phase II/III study                                            | Hide, , M, Yagami, A, Togawa, M, Saito, A; Furue, M                                                                                                                                                                                    | 2017 |
| A Slow- Compared with a Fast-Release Form of Oral Arginine Increases Its Utilization for Nitric Oxide Synthesis in Overweight Adults with Cardiometabolic Risk Factors in a Randomized Controlled Study                             | Deveaux, , A, Fouillet, H, Petzke, KJ, Hermier, D, André, E, Bunouf, P, Lantoin-Adam, F, Benamouzig, R, Mathé, V, Huneau, JF; Mariotti, F                                                                                              | 2016 |
| L-Arginine Supplementation Alleviates Postprandial Endothelial Dysfunction When Baseline Fasting Plasma Arginine Concentration Is Low: a Randomized Controlled Trial in Healthy Overweight Adults with Cardiometabolic Risk Factors | Deveaux, , A, Pham, I, West, SG, André, E, Lantoin-Adam, F, Bunouf, P, Sadi, S, Hermier, D, Mathé, V, Fouillet, H, Huneau, JF, Benamouzig, R; Mariotti, F                                                                              | 2016 |
| Evaluation of a Novel Intervention for Infants At Risk for Neurodevelopmental Disorders                                                                                                                                             | NCT03388294                                                                                                                                                                                                                            | 2018 |
| Schizophrenia with history of alcohol use disorder suffers a worse course of psychosis: results from NIMH catie study analyses                                                                                                      | Pathak, , S, Jiang, Y, DiPetrillo, L, Todtenkopf, M, Liu, Y, Silverman, B; Correll, C                                                                                                                                                  | 2016 |
| Impact of amoxicillin on pneumococcal colonization compared with other therapies for acute otitis media                                                                                                                             | Toltzis, , P, Dul, M, O'Riordan, MA, Toltzis, H; Blumer, JL                                                                                                                                                                            | 2005 |
| A preliminary study on T-786C endothelial nitric oxide synthase gene and renal hemodynamic and blood pressure responses to dietary sodium                                                                                           | Dengel, , DR, Brown, MD, Ferrell, RE, Reynolds, TH; Supiano, MA                                                                                                                                                                        | 2007 |
| Diagnostic and Prognostic Value of Plasma Levels of Cardiac Myosin Binding Protein-C as a Novel Biomarker in Heart Failure                                                                                                          | El Amrousy, , D, Hodeib, H, Suliman, G, Hablas, N, Salama, ER; Esam, A                                                                                                                                                                 | 2017 |
| Improving Chronic Disease Management With Pieces                                                                                                                                                                                    | NCT02587936                                                                                                                                                                                                                            | 2015 |
| Novel treatments for acute asthma                                                                                                                                                                                                   | Sagiani, S                                                                                                                                                                                                                             | 2017 |
| Effects of serelexin on the outcome of patients with or without substantial peripheral edema: a subgroup analysis from the RELAX-AHF trial                                                                                          | Gimpelewicz, , C, Metra, M, Cleland, JGF, Szecsködy, P, Chang Wun, CC, Boer-Martins, L, Cotter, G, Davison, BA, Felker, GM, Filippatos, G, Greenberg, BH, Pang, P, Ponikowski, P, Severin, T, Voors, AA; Teerlink, JR                  | 2017 |
| Impact of cocoa consumption on inflammation processes—a critical review of randomized controlled trials                                                                                                                             | Ellinger, , S; Stehle, P                                                                                                                                                                                                               | 2016 |
| VTD-melphalan is well tolerated and results in very high rates of stringent CR and MRD-negative status in multiple myeloma                                                                                                          | Nadiminti, , K, Singh Abbi, KK, Mott, SL, Dozeman, L, Tricot, A, Schultz, A, Behrends, S, Zhan, F; Tricot, G                                                                                                                           | 2017 |
| Do we treat our patients or rather periodontal microbes with adjunctive antibiotics in periodontal therapy? A 16S rDNA microbial community analysis                                                                                 | Hagenfeld, , D, Koch, R, Jünemann, S, Prior, K, Harks, I, Eickholz, P, Hoffmann, T, Kim, TS, Kocher, T, Meyle, J, Kaner, D, Schlagenhauf, U, Ehmke, B; Harmsen, D                                                                      | 2018 |

|                                                                                                                                                                                                                                                      |                                                                                                                                                                                                                                                                                                       |      |
|------------------------------------------------------------------------------------------------------------------------------------------------------------------------------------------------------------------------------------------------------|-------------------------------------------------------------------------------------------------------------------------------------------------------------------------------------------------------------------------------------------------------------------------------------------------------|------|
| St. John's Wort in the Treatment of Raynaud's Phenomenon                                                                                                                                                                                             | NCT00351117                                                                                                                                                                                                                                                                                           | 2006 |
| Baseline analysis of PXT3003 phase 2 data reveals two blood early candidate biomarkers for therapeutic response in CMT1A                                                                                                                             | Laffaire, J, Mandel, J, Bertrand, V, Scart-Gres, C, Milet, A, Hajj, R, Chumakov, I, Nabirotkin, S, Guedj, M; Cohen, D                                                                                                                                                                                 | 2015 |
| Intranasal oxytocin reduces provoked symptoms in female patients with posttraumatic stress disorder despite exerting sympathomimetic and positive chronotropic effects in a randomized controlled trial                                              | Sack, M, Spieler, D, Wizelman, L, Epple, G, Stich, J, Zaba, M; Schmidt, U                                                                                                                                                                                                                             | 2017 |
| Can We Stop Antibiotic Therapy When Signs and Symptoms Have Resolved in Diabetic Foot Infection Patients?                                                                                                                                            | Chu, Y, Wang, C, Zhang, J, Wang, P, Xu, J, Ding, M, Li, X, Hou, X, Feng, S; Li, X                                                                                                                                                                                                                     | 2015 |
| Suppression of T Cell Activation and Collagen Accumulation by an Anti-IFNAR1 mAb, Anifrolumab, in Adult Patients with Systemic Sclerosis                                                                                                             | Guo, X, Higgs, BW, Bay-Jensen, AC, Karsdal, MA, Yao, Y, Roskos, LK; White, WI                                                                                                                                                                                                                         | 2015 |
| Effects of HDV infection and pegylated interferon $\alpha$ treatment on the natural killer cell compartment in chronically infected individuals                                                                                                      | Lunemann, S, Malone, DF, Grabowski, J, Port, K, Béziat, V, Bremer, B, Malmberg, KJ, Manns, MP, Sandberg, JK, Cornberg, M, Ljunggren, HG, Wedemeyer, H; Björkström, NK                                                                                                                                 | 2015 |
| Phase 2 baseline versus treatment clinical trial of the HIV drug raltegravir in patients with active relapsing remitting multiple sclerosis: the INSPIRE study results                                                                               | Marta, M, MacManus, D, Yousry, T, Miller, D, Altmann, DR, Meier, UC, Christensen, T, Maruszak, H, Holden, D, Bianchi, L, Adiatori, R, Schmierer, K, Turner, B, Giovannoni, G; Gold, J                                                                                                                 | 2016 |
| The effect of basal insulin glargine on the fibrinolytic system and von Willebrand factor in people with dysglycaemia and high risk for cardiovascular events: swedish substudy of the Outcome Reduction with an Initial Glargine Intervention trial | Rautio, A, Boman, K, Gerstein, HC, Hernestål-Boman, J, Lee, SF, Olofsson, M; Mellbin, LG                                                                                                                                                                                                              | 2017 |
| The impact of topical calcipotriol and betamethasone on human $\beta$ -defensin 2 expression and serum level in psoriatic patients                                                                                                                   | Abdelmaksood, R; Hashad, D                                                                                                                                                                                                                                                                            | 2013 |
| EMERGE: a Randomized Phase II Study of the Antibody-Drug Conjugate Glematimumab Vedotin in Advanced Glycoprotein NMB-Expressing Breast Cancer                                                                                                        | Yardley, DA, Weaver, R, Melisko, ME, Saleh, MN, Arena, FP, Forero, A, Cigler, T, Stopeck, A, Citrin, D, Oliff, I, Bechhold, R, Loutfi, R, Garcia, AA, Cruickshank, S, Crowley, E, Green, J, Hawthorne, T, Yellin, MJ, Davis, TA; Vahdat, LT                                                           | 2015 |
| Lineage classification of childhood acute lymphoblastic leukemia according to the EGIL recommendations: results of the ALL-BFM 2000 trial                                                                                                            | Ratei, R, Schabath, R, Karawajew, L, Zimmermann, M, Möricke, A, Schrappe, M; Ludwig, WD                                                                                                                                                                                                               | 2013 |
| Outcome after induction chemotherapy for older patients with acute myeloid leukemia is not improved with mitoxantrone and etoposide compared to cytarabine and daunorubicin: a Southwest Oncology Group study                                        | Anderson, JE, Kopecky, KJ, Willman, CL, Head, D, O'Donnell, MR, Luthardt, FW, Norwood, TH, Chen, IM, Balcerzak, SP, Johnson, DB; Appelbaum, FR                                                                                                                                                        | 2002 |
| The natural history of the progression of atrophy secondary to stargardt disease (ProgStar) studies: design and Baseline characteristics: progstar Report No. 1                                                                                      |                                                                                                                                                                                                                                                                                                       | 2016 |
| Epicardial adipose tissue volume increase in hemodialysis patients treated with sevelamer or calcium-based phosphate binders: a substudy of the Renegel in new dialysis trial                                                                        | Ko, SM, Zhang, C, Chen, Z, D'Marco, L, Bellasi, A, Stillman, AE, Block, G; Raggi, P                                                                                                                                                                                                                   | 2016 |
| The C677T MTHFR genotypes influence the efficacy of B9 and B12 vitamins supplementation to lowering plasma total homocysteine in hemodialysis                                                                                                        | Achour, O, Elmtaoua, S, Zellama, D, Omezzine, A, Moussa, A, Rejeb, J, Boumaiza, I, Bouacida, L, Rejeb, NB, Achour, A; Bouslama, A                                                                                                                                                                     | 2016 |
| Antiangiogenic therapy in recurrent breast cancer with lymphangitic spread to the chest wall: a randomized phase II trial of bevacizumab with sequential or concurrent oral vinorelbine and capecitabine                                             | Curigliano, G, Bagnardi, V, Bertolini, F, Alcalay, M, Locatelli, MA, Fumagalli, L, Rabascio, C, Calleri, A, Adamoli, L, Criscitello, C, Viale, G; Goldhirsch, A                                                                                                                                       | 2015 |
| Post-discharge electrocardiogram Holter monitoring in recently hospitalised individuals with chronic atrial fibrillation to enhance therapeutic monitoring and identify potentially predictive phenotypes                                            | Ball, J, Carrington, MJ, Thompson, DR, Horowitz, JD; Stewart, S                                                                                                                                                                                                                                       | 2015 |
| Autologous transplantation as consolidation for high risk aggressive T-cell non-hodgkin's lymphoma: a SWOG S9704 intergroup trial subgroup analysis                                                                                                  | Stiff, PJ, Li, H, Cook, JR, Constine, LS, Couban, S, Stewart, DA, Shea, TC, Porcu, P, Winter, JN, Kahl, BS, Smith, SM, Marcellus, D, Barton, K, Mills, GM, LeBlanc, M, Rimsza, L, Forman, SJ, Leonard, JP, Fisher, RI; Friedberg, J                                                                   | 2016 |
| Short telomeres are independent prognostic factors associated WITH poor outcome IN chronic lymphocytic leukemia (CLL) Treated WITH chlorambucil with or without the addition of rituximab or obinutuzumab: results from CLL11 Trial of the Gellsg    | Chelliah Jebaraj, BM, Scheffold, A, Robrecht, S, Bahlo, J, Goede, V, Tausch, E, Estenfelder, S, Opatma, V, Ritgen, M, Van Dongen, JJ, Langerak, AW, Fingerle-Rowson, G, Kneba, M, Fischer, K, Hallek, MJ, Dohner, H; Stilgenbauer, S                                                                  | 2017 |
| Tailored adjunctive cilostazol therapy based on CYP2C19 genotyping in patients with acute myocardial infarction — The CALDERA-GENE study                                                                                                             | Kaikita, K, Yoshimura, H, Ishii, M, Kudoh, T, Yamada, Y, Yamamoto, E, Izumiya, Y, Kojima, S, Shimomura, H, Tsunoda, R, Matsui, K, Ogawa, H; Tsujita, K                                                                                                                                                | 2018 |
| $\alpha$ -Smooth muscle actin expression and desmoplastic stromal reaction in pancreatic cancer: results from the CONKO-001 study                                                                                                                    | Sinn, M, Denkert, C, Striefler, JK, Pelzer, U, Stieler, JM, Bahra, M, Lohneis, P, Dörken, B, Oettle, H, Riess, H; Sinn, BV                                                                                                                                                                            | 2014 |
| A placebo controlled observer blind immunocytochemical and histologic study of epithelium adjacent to anogenital warts in patients treated with systemic interferon alpha in combination with cryotherapy or cryotherapy alone                       | Handley, JM, Maw, RD, Horner, T, Lawther, H, Walsh, M; Dinsmore, WW                                                                                                                                                                                                                                   | 1992 |
| NCI#9673 phase II study of nivolumab in refractory metastatic squamous cell carcinoma of the anal canal: immunologic correlates of response                                                                                                          | Morris, V, Mahvash, A, Vence, L, Blando, J, Wolff, RA, Ohinata, A, Ohaji, C, Allison, J, Sharma, P; Eng, C                                                                                                                                                                                            | 2016 |
| Improved survival outcomes for patients with extra-nodal NK/T lymphoma: data from 140 patients prospectively registered in the international T-cell project                                                                                          | Fox, CP, Bellei, M, Manni, M, Kim, SJ, Ko, YH, Shustov, AR, Cabrera, ME, Chiatton, CS, Horwitz, SM, Spina, M, Advani, RH, Angrilli, F, De Souza, CA, Dlouhy, I, Fernandez-Alvarez, R, Gabus, R, Hitz, F, Laszlo, D, Montoto, S, Nagler, A, Pavlovsky, A, Vitolo, U, Zoppegno, L, Federico, M; Kim, WS | 2017 |
| DAR-EPOCH Vs. R-CHOP for high-risk diffuse large b-cell lymphoma: the mayo clinic florida experience                                                                                                                                                 | Dholaria, B, Vishnu, P, Roy, V, Tun, HW, Sher, T, Rivera, CE, Ailawadhi, S, Diehl, N, Hodge, DO; Moreno-Vanegas, YA                                                                                                                                                                                   | 2017 |

|                                                                                                                                                                                                                                   |                                                                                                                                                                                                                                                                 |      |
|-----------------------------------------------------------------------------------------------------------------------------------------------------------------------------------------------------------------------------------|-----------------------------------------------------------------------------------------------------------------------------------------------------------------------------------------------------------------------------------------------------------------|------|
| Minimal residual disease and outcomes in relapsed/refractory follicular lymphoma (FL) in the phase III gadolin trial of obinutuzumab and bendamustine vs bendamustine                                                             | Pott, , C, Belada, D, Danesi, N, Fingerle-Rowson, GR, Gribben, J, Harbron, CG, Hoster, E, Kahl, BS, Kehden, B, Mundt, KE, Nicolas-Virelizier, E, Sehn, LH; Cheson, BD                                                                                           | 2017 |
| Role of oxidative stress in diabetic kidney disease                                                                                                                                                                               | Hakim, , FA; Pflueger, A                                                                                                                                                                                                                                        | 2010 |
| High percentage of CD34-positive cells in autologous AML peripheral blood stem cell products reflects inadequate in vivo purging and low chemotherapeutic toxicity in a subgroup of patients with poor clinical outcome           | Feller, , N, Schuurhuis, GJ, van der Pol, MA, Westra, G, Weijers, GW, van Stijn, A, Huijgens, PC; Ossenkoppele, GJ                                                                                                                                              | 2003 |
| Mutations linked to drug resistance, human immunodeficiency virus type 1 biologic phenotype and their association with disease progression in children receiving nucleoside reverse transcriptase inhibitors                      | Englund, , JA, Raskino, C, Vavro, C, Palumbo, P, Ross, LL, McKinney, R, Nikolic-Djokic, D, Colgrove, RC; Baker, CJ                                                                                                                                              | 2004 |
| Effect of resistance exercise on skeletal muscle myopathy in heart transplant recipients                                                                                                                                          | Braith, , RW, Magyari, PM, Pierce, GL, Edwards, DG, Hill, JA, White, LJ; Aranda, JM                                                                                                                                                                             | 2005 |
| Relationship between measures of infliximab exposure and clinical outcome of infliximab intensification at therapeutic failure in crohn's disease                                                                                 | Steenholdt, , C, Edlund, H, Ainsworth, MA, Brynskov, J, Thomsen, O, Huisinga, W; Kloft, C                                                                                                                                                                       | 2015 |
| Randomized, Double Blind, Placebo-Controlled, Phase IIB Trial of Ketorolac Mouth Rinse Evaluating the Effect of Cyclooxygenase Inhibition on Oropharyngeal Leukoplakia: collaborative Study of the NCI, NIDCD and the NIDCR       | NCT00001698                                                                                                                                                                                                                                                     | 1999 |
| Effect of remote ischemic preconditioning on electrophysiological and biomolecular parameters in nonvalvular paroxysmal atrial fibrillation (RIPPAF study): rationale and study design of a randomized, controlled clinical trial | Kosiuk, , J, Milani, R, Ueberham, L, Uhe, T, Stegmann, C, Hindricks, G; Bollmann, A                                                                                                                                                                             | 2016 |
| Baseline specific IgE levels are useful to predict safety of oral immunotherapy in egg-allergic children                                                                                                                          | Vazquez-Ortiz, , M, Alvaro, M, Piquer, M, Dominguez, O, Machinena, A, Martin-Mateos, MA; Plaza, AM                                                                                                                                                              | 2014 |
| A double-blind placebo-controlled trial of antioxidant therapy in limited cutaneous systemic sclerosis                                                                                                                            | Herrick, , AL, Hollis, S, Schofield, D, Rieley, F, Blann, A, Griffin, K, Moore, T, Braganza, JM; Jayson, MI                                                                                                                                                     | 2000 |
| Fish Oil-Derived Fatty Acids in Pregnancy and Wheeze and Asthma in Offspring                                                                                                                                                      | Bisgaard, , H, Stokholm, J, Chawes, BL, Vissing, NH, Bjarnadóttir, E, Schoos, AM, Wolsk, HM, Pedersen, TM, Vinding, RK, Thorsteinsdóttir, S, Følsgaard, NV, Fink, NR, Thorsen, J, Pedersen, AG, Waage, J, Rasmussen, MA, Stark, KD, Olsen, SF; Bønnelykke, K    | 2016 |
| Effects of short-term treatment with metformin on markers of endothelial function and inflammatory activity in type 2 diabetes mellitus: a randomized, placebo-controlled trial                                                   | De Jager, , J, Kooy, A, Leher, P, Bets, D, Wulffélé, MG, Teerlink, T, Scheffer, PG, Schalkwijk, CG, Donker, AJ; Stehouwer, CD                                                                                                                                   | 2005 |
| The effects of vitamin D supplementation on airway functions in mild to moderate persistent asthma                                                                                                                                | Arshi, , S, Fallahpour, M, Nabavi, M, Bemanian, MH, Javad-Mousavi, SA, Nojomi, M, Esmailzadeh, H, Molatefi, R, Rekabi, M, Jalali, F; Akbarpour, N                                                                                                               | 2014 |
| Efficacy in Walked Distance of Indacaterol vs Tiotropium in Women With COPD Secondary to Biomass (EMERALD)                                                                                                                        | NCT02473237                                                                                                                                                                                                                                                     | 2015 |
| Effect of Periodontal Treatment on HbA1c among Patients with Prediabetes                                                                                                                                                          | Kocher, , T, Holtfreter, B, Petersmann, A, Eickholz, P, Hoffmann, T, Kaner, D, Kim, TS, Meyle, J, Schlagenhauf, U, Doering, S, Gravemeier, M, Prior, K, Rathmann, W, Harks, I, Ehmke, B; Koch, R                                                                | 2019 |
| Clinical signs of epithelial surface disruption impact pain and sexual Health in Patients with moderate-to-severe genital psoriasis                                                                                               | Schloebe, A                                                                                                                                                                                                                                                     | 2019 |
| Deacetylase inhibitors: an advance in myeloma therapy?                                                                                                                                                                            | Laubach, , JP, San-Miguel, JF, Hungria, V, Hou, J, Moreau, P, Lonial, S, Lee, JH, Einsele, H, Alsina, M; Richardson, PG                                                                                                                                         | 2017 |
| Evaluation of preload functional status and cardiac output in sepsis resuscitation                                                                                                                                                | Douglas, , I, Alapat, P, Corl, K, Exline, M, Forni, L, Holder, A, Kaufman, D, Khan, A, Levy, M, Martin, G, Sahatjian, J, Seely, E, Self, W, Shapiro, N, Williams, M, Winterbottom, C; Hansell, D                                                                | 2018 |
| Evaluation of a corticotropin releasing hormone type 1 receptor antagonist in women with posttraumatic stress disorder: study protocol for a randomized controlled trial                                                          | Dunlop, , BW, Rothbaum, BO, Binder, EB, Duncan, E, Harvey, PD, Jovanovic, T, Kelley, ME, Kinkad, B, Kutner, M, Iosifescu, DV, Mathew, SJ, Neylan, TC, Kilts, CD, Nemeroff, CB; Mayberg, HS                                                                      | 2014 |
| Atezolizumab versus docetaxel for patients with previously treated non-small-cell lung cancer (POPLAR): a multicentre, open-label, phase 2 randomised controlled trial                                                            | Fehrenbacher, , L, Spira, A, Ballinger, M, Kowanzet, M, Vansteenkiste, J, Mazieres, J, Park, K, Smith, D, Artal-Cortes, A, Lewanski, C, Braiteh, F, Waterkamp, D, He, P, Zou, W, Chen, DS, Yi, J, Sandler, A; Rittmeyer, A                                      | 2016 |
| The impact of allogeneic hematopoietic cell transplantation (HCT) and treatment with ruxolitinib on survival in patients with myelofibrosis                                                                                       | Jaekel, , N, Wang, S-Y, Krahl, R, Hubert, K, Schulze, S, Stengel, R, Schneider, M, Roskos, M, Niederwieser, D; Al-Ali, HK                                                                                                                                       | 2015 |
| Up-regulation of the immunoregulatory enzyme indoleamine-2,3-dioxygenase (IDO) with consecutive tryptophan depletion predicts death in patients with neuroendocrine neoplasia                                                     | Pschowski, , R, Pape, UF, Fusch, G, Jann, H, Maasberg, S, Arsenic, R, Baur, A, Wiedenmann, B, Pavel, M; Schefold, JC                                                                                                                                            | 2016 |
| Targeting human $\gamma\delta$ T cells with zoledronate and interleukin-2 for immunotherapy of hormone-refractory prostate cancer                                                                                                 | Dieli, , F, Vermijlen, D, Fulfaro, F, Caccamo, N, Meraviglia, S, Cicero, G, Roberts, A, Buccheri, S, D'Asaro, M, Gebbia, N, Salerno, A, Eberl, M; Hayday, AC                                                                                                    | 2007 |
| Determination of the optimal minimum radioiodine dose in patients with Graves' disease: a clinical outcome study                                                                                                                  | Howarth, , D, Epstein, M, Lan, L, Tan, P; Booker, J                                                                                                                                                                                                             | 2001 |
| OASIS-HIT: design of a pharmacogenomic dose-finding study                                                                                                                                                                         | Staessen, , JA, Kuznetsova, T, Acceto, R, Bacchieri, A, Brand, E, Burnier, M, Celis, H, Citterio, L, de Leeuw, PW, Filipovsky, J, Fournier, A, Kawecka-Jaszcz, K, Manunta, P, Nikitin, Y, O'Brien, ET, Redon, J, Thijs, L, Ferrari, P, Valentini, G, Bianchi, G | 2005 |
| Fulranumab in patients with interstitial cystitis/bladder pain syndrome: observations from a randomized, double-blind, placebo-controlled study                                                                                   | Wang, , H, Russell, LJ, Kelly, KM, Wang, S; Thipphawong, J                                                                                                                                                                                                      | 2017 |

|                                                                                                                                                                                                                    |                                                                                                                                                                                                                                                                                                                                                                                                                                                                                                                                                                                                                                                                                                                                                                                                                                                                                                                                                                                                                                                                                                                                                                                                                                                                                                                                                                                                                             |      |
|--------------------------------------------------------------------------------------------------------------------------------------------------------------------------------------------------------------------|-----------------------------------------------------------------------------------------------------------------------------------------------------------------------------------------------------------------------------------------------------------------------------------------------------------------------------------------------------------------------------------------------------------------------------------------------------------------------------------------------------------------------------------------------------------------------------------------------------------------------------------------------------------------------------------------------------------------------------------------------------------------------------------------------------------------------------------------------------------------------------------------------------------------------------------------------------------------------------------------------------------------------------------------------------------------------------------------------------------------------------------------------------------------------------------------------------------------------------------------------------------------------------------------------------------------------------------------------------------------------------------------------------------------------------|------|
| Pirfenidone in patients with unclassifiable progressive fibrosing interstitial lung disease: design of a double-blind, randomised, placebo-controlled phase II trial                                               | Maheer, TM, Corte, TJ, Fischer, A, Kreuter, M, Lederer, DJ, Molina-Molina, M, Axmann, J, Kirchgaessler, K-U; Cottin, V                                                                                                                                                                                                                                                                                                                                                                                                                                                                                                                                                                                                                                                                                                                                                                                                                                                                                                                                                                                                                                                                                                                                                                                                                                                                                                      | 2018 |
| Highlights from: the 43rd Annual Meeting of the American Society of Clinical Oncology; Chicago, IL; June 2007                                                                                                      |                                                                                                                                                                                                                                                                                                                                                                                                                                                                                                                                                                                                                                                                                                                                                                                                                                                                                                                                                                                                                                                                                                                                                                                                                                                                                                                                                                                                                             | 2007 |
| Utilization of an "n-of-1" study design to test the effect of ivacaftor in CF patients with residual CFTR function and FEV1 >40% of predicted                                                                      | Nick, JA, Rodman, D, St Clair, C, Jones, MC, Li, H; Higgins, M                                                                                                                                                                                                                                                                                                                                                                                                                                                                                                                                                                                                                                                                                                                                                                                                                                                                                                                                                                                                                                                                                                                                                                                                                                                                                                                                                              | 2014 |
| The relationship of pharmacodynamics (PD) and pharmacokinetics (PK) to clinical outcomes in a phase I study of OX40 agonistic monoclonal antibody (mAb) PF-04518600 (PF-8600)                                      | El-Khoueiry, AB, Hamid, O, Thompson, JA, Ros, W, Eskens, F, Doi, T, Hu-Lieskovan, S, Chou, J, Liao, K, Ganguly, BJ, Fleener, C, Joh, T; Diab, A                                                                                                                                                                                                                                                                                                                                                                                                                                                                                                                                                                                                                                                                                                                                                                                                                                                                                                                                                                                                                                                                                                                                                                                                                                                                             | 2017 |
| Effects of Botulinum Toxin Injections in Patients With Hereditary Spastic Paraplegia                                                                                                                               | NCT02604186                                                                                                                                                                                                                                                                                                                                                                                                                                                                                                                                                                                                                                                                                                                                                                                                                                                                                                                                                                                                                                                                                                                                                                                                                                                                                                                                                                                                                 | 2015 |
| Short Term Effects of Ivacaftor in Non-G551D Cystic Fibrosis Patients                                                                                                                                              | NCT01784419                                                                                                                                                                                                                                                                                                                                                                                                                                                                                                                                                                                                                                                                                                                                                                                                                                                                                                                                                                                                                                                                                                                                                                                                                                                                                                                                                                                                                 | 2013 |
| A multicenter, randomized study of decitabine as epigenetic priming with induction chemotherapy in children with AML                                                                                               | Gore, L, Triche, TJ, Farrar, JE, Wai, D, Legendre, C, Gooden, GC, Liang, WS, Carpten, J, Lee, D, Alvaro, F, Macy, ME, Arndt, C, Barnette, P, Cooper, T, Martin, L, Narendran, A, Pollard, J, Meshinchi, S, Boklan, J, Arceci, RJ; Salhia, B                                                                                                                                                                                                                                                                                                                                                                                                                                                                                                                                                                                                                                                                                                                                                                                                                                                                                                                                                                                                                                                                                                                                                                                 | 2017 |
| Dexamethasone-based therapy for childhood acute lymphoblastic leukaemia: results of the prospective Dutch Childhood Oncology Group (DCOG) protocol ALL-9 (1997-2004)                                               | Veerman, AJ, Kamps, WA, van den Berg, H, van den Berg, E, Böklerink, JP, Bruin, MC, van den Heuvel-Eibrink, MM, Korbijn, CM, Korthof, ET, van der Pal, K, Stijnen, T, van Weel Sipman, MH, van Weerden, JF, van Wering, ER; van der Does-van den Berg, A                                                                                                                                                                                                                                                                                                                                                                                                                                                                                                                                                                                                                                                                                                                                                                                                                                                                                                                                                                                                                                                                                                                                                                    | 2009 |
| Phase II study of olaratumab with paclitaxel/carboplatin (P/C) or P/C alone in previously untreated advanced NSCLC                                                                                                 | Gerber, DE, Swanson, P, Lopez-Chavez, A, Wong, L, Dowlati, A, Pennell, NA, Cronier, DM, Qin, A, Ilaria, R, Cosaert, J, Shahir, A; Baggstrom, MQ                                                                                                                                                                                                                                                                                                                                                                                                                                                                                                                                                                                                                                                                                                                                                                                                                                                                                                                                                                                                                                                                                                                                                                                                                                                                             | 2017 |
| SPARC expression in resected pancreatic cancer patients treated with gemcitabine: results from the CONKO-001 study                                                                                                 | Sinn, M, Sinn, BV, Striefler, JK, Lindner, JL, Stieler, JM, Lohneis, P, Bischoff, S, Bläker, H, Pelzer, U, Bahra, M, Dietel, M, Dörken, B, Oettle, H, Riess, H; Denkert, C                                                                                                                                                                                                                                                                                                                                                                                                                                                                                                                                                                                                                                                                                                                                                                                                                                                                                                                                                                                                                                                                                                                                                                                                                                                  | 2014 |
| PD-L1 expression on circulating CD45(-) cells is an independent prognostic factor for overall survival (OS) in patients (Pts) across all stages of treatment-naïve lung cancer in a prospective, multicenter study | Graf, R, Lu, D, Krupa, R, Louw, J, Dugan, L, Jendrisak, A, Orr, S, Bethel, K, Wang, Y, Suraneni, M, Landers, M, Boffa, D, Nieva, J, Bazhenova, L, Salazar, M, Makani, S, Magana, M; Dittamore, R                                                                                                                                                                                                                                                                                                                                                                                                                                                                                                                                                                                                                                                                                                                                                                                                                                                                                                                                                                                                                                                                                                                                                                                                                            | 2016 |
| Effect of pregabalin on radiotherapy-related neuropathic pain in patients with head and neck cancer: a randomized controlled trial                                                                                 | Jiang, J, Li, Y, Shen, Q, Rong, X, Huang, X, Li, H, Zhou, L, Mai, H-Q, Zheng, D, Chen, M-Y, Xu, Y, Li, J, Hui, X, Simone, CB, Gaertner, J, Argyriou, AA, Chow, E, Chen, P; Tang, Y                                                                                                                                                                                                                                                                                                                                                                                                                                                                                                                                                                                                                                                                                                                                                                                                                                                                                                                                                                                                                                                                                                                                                                                                                                          | 2019 |
| Dynamic changes in CD45RA-Foxp3high regulatory T-cells in chronic hepatitis C patients during antiviral therapy                                                                                                    | Li, Z, Ping, Y, Yu, Z, Wang, M, Yue, D, Zhang, Z, Li, J, Zhang, B, Shi, X; Zhang, Y                                                                                                                                                                                                                                                                                                                                                                                                                                                                                                                                                                                                                                                                                                                                                                                                                                                                                                                                                                                                                                                                                                                                                                                                                                                                                                                                         | 2016 |
| Resistance training increases muscle mitochondrial biogenesis in patients with chronic kidney disease                                                                                                              | Balakrishnan, VS, Rao, M, Menon, V, Gordon, PL, Pilichowska, M, Castaneda, F; Castaneda-Sceppa, C                                                                                                                                                                                                                                                                                                                                                                                                                                                                                                                                                                                                                                                                                                                                                                                                                                                                                                                                                                                                                                                                                                                                                                                                                                                                                                                           | 2010 |
| Periodontal treatment effects on endothelial function and cardiovascular disease biomarkers in subjects with chronic periodontitis: protocol for a randomized clinical trial                                       | Ramirez, JH, Arce, RM; Contreras, A                                                                                                                                                                                                                                                                                                                                                                                                                                                                                                                                                                                                                                                                                                                                                                                                                                                                                                                                                                                                                                                                                                                                                                                                                                                                                                                                                                                         | 2011 |
| Variants in the APOA5 gene region and the response to combination therapy with statins and fenofibric acid in a randomized clinical trial of individuals with mixed dyslipidemia                                   | Brautbar, A, Covarrubias, D, Belmont, J, Lara-Garduno, F, Virani, SS, Jones, PH, Leal, SM; Ballantyne, CM                                                                                                                                                                                                                                                                                                                                                                                                                                                                                                                                                                                                                                                                                                                                                                                                                                                                                                                                                                                                                                                                                                                                                                                                                                                                                                                   | 2011 |
| Ascorbic acid for Charcot-Marie-Tooth disease type 1A in children: a randomised, double-blind, placebo-controlled, safety and efficacy trial                                                                       | Burns, J, Ouvrier, RA, Yiu, EM, Joseph, PD, Kornberg, AJ, Fahey, MC; Ryan, MM                                                                                                                                                                                                                                                                                                                                                                                                                                                                                                                                                                                                                                                                                                                                                                                                                                                                                                                                                                                                                                                                                                                                                                                                                                                                                                                                               | 2009 |
| Effect of Self- and Family Management of Diabetic Foot Ulcers Programs on Health Outcomes                                                                                                                          | NCT03909802                                                                                                                                                                                                                                                                                                                                                                                                                                                                                                                                                                                                                                                                                                                                                                                                                                                                                                                                                                                                                                                                                                                                                                                                                                                                                                                                                                                                                 | 2019 |
| A placebo-controlled trial of silymarin in patients with nonalcoholic fatty liver disease                                                                                                                          | Hashemi, SJ, Hajiani, E; Sardabi, EH                                                                                                                                                                                                                                                                                                                                                                                                                                                                                                                                                                                                                                                                                                                                                                                                                                                                                                                                                                                                                                                                                                                                                                                                                                                                                                                                                                                        | 2009 |
| Early peripheral blast cell clearance assessed by flow cytometry in induction is a novel powerful prognostic indicator in acute myeloid leukemia: a northern Italy leukemia group (NILG) study                     | Gianfaldoni, G, Mannelli, F, Intermesoli, T, Cutini, I, Giupponi, D, Bencini, S, Bonetti, MI, Masciulli, A, Marmont, F, Ferrero, D, Cavazzina, R, Bosi, A, Rambaldi, A; Bassan, R                                                                                                                                                                                                                                                                                                                                                                                                                                                                                                                                                                                                                                                                                                                                                                                                                                                                                                                                                                                                                                                                                                                                                                                                                                           | 2014 |
| In Children With Nonalcoholic Fatty Liver Disease, Cysteamine Bitartrate Delayed Release Improves Liver Enzymes but Does Not Reduce Disease Activity Scores                                                        | Wilson, LA, Neuschwander-Tetri, BA, Xanthakos, SA, Barlow, SE, Vos, MB, Karpen, SJ, Jain, AK, Murray, KF, Van Natta, ML, Doo, E, Abrams, SH, Himes, R, Krisnamurthy, R, Maldonado, L, Mahabir, R, Bernstein, K, Bramlage, K, Cecil, K, DeVore, S, Kohli, R, Lake, K, Podberesky, D, Towbin, A, Xanthakos, S, Behr, G, Lavine, JE, Lefkowitz, JH, Mencin, A, Reynoso, E, Alazraki, A, Cleeton, R, Karpen, S, Cruz Munos, J, Raviele, N, Vos, M, Bozic, M, Cummings, OW, Klipsch, A, Molleston, JP, Munson, S, Sandrasegaran, K, Subbarao, G, Kafka, K, Scheimann, A, Amsden, K, Fishbein, MH, Kirwan, E, Mohammad, S, Riggsby, C, Sharda, L, Whittington, PF, Barlow, S, Derdoy, J, Jain, A, King, D, Osmack, P, Siegner, J, Stewart, S, Torretta, S, Wriston, K, Baker, SS, Zhu, L, Africa, J, Angeles, J, Arroyo, S, Awai, H, Behling, C, Bross, C, Durelle, J, Middleton, M, Newton, K, Paiz, M, Sanford, J, Schwimmer, JB, Sirlin, C, Ugalde-Nicalo, P, Villarreal, MD, Aouizerat, B, Courtier, J, Ferrell, LD, Fleck, S, Gill, R, Langlois, C, Perito, ER, Rosenthal, P, Tsai, P, Cooper, K, Horslen, S, Hsu, E, Murray, K, Otto, R, Yeh, M, Young, M, Brunt, EM, Fowler, K, Kleiner, DE, Brown, S, Doo, EC, Hoofnagle, JH, Robuck, PR, Sherker, A, Torrance, R, Belt, P, Clark, JM, Donithan, M, Hallinan, E, Isaacson, M, May, KP, Miriel, L, Sternberg, A, Tonascia, J, Van Natta, M, Vaughn, I, Wilson, L; Yates, K | 2016 |



|                                                                                                                                                                                                                                                                                            |                                                                                                                                                                                                                                                                                                                                                                                                                                                                                                                         |      |
|--------------------------------------------------------------------------------------------------------------------------------------------------------------------------------------------------------------------------------------------------------------------------------------------|-------------------------------------------------------------------------------------------------------------------------------------------------------------------------------------------------------------------------------------------------------------------------------------------------------------------------------------------------------------------------------------------------------------------------------------------------------------------------------------------------------------------------|------|
| Phase 2, randomised placebo-controlled trial to evaluate the efficacy and safety of an anti-GM-CSF antibody (KB003) in patients with inadequately controlled asthma                                                                                                                        | Molfino, , NA, Kuna, P, Leff, JA, Oh, CK, Singh, D, Chernow, M, Sutton, B; Yarranton, G                                                                                                                                                                                                                                                                                                                                                                                                                                 | 2016 |
| Ready-to-use food supplement, with or without arginine and citrulline, with daily chloroquine in Tanzanian children with sickle-cell disease: a double-blind, random order crossover trial                                                                                                 | Cox, , SE, Ellins, EA, Marealle, AI, Newton, CR, Soka, D, Sasi, P, Luca Di Tanna, G, Johnson, W, Makani, J, Prentice, AM, Halcox, JP; Kirkham, FJ                                                                                                                                                                                                                                                                                                                                                                       | 2018 |
| Anti-oxidative treatment with vitamin E improves peripheral vascular function in patients with diabetes mellitus and Haptoglobin 2-2 genotype: a double-blinded cross-over study                                                                                                           | Alshiek, , JA, Dayan, L, Asleh, R, Blum, S, Levy, AP; Jacob, G                                                                                                                                                                                                                                                                                                                                                                                                                                                          | 2017 |
| Rituximab improves peripheral B cell abnormalities in human systemic lupus erythematosus                                                                                                                                                                                                   | Anolik, , JH, Barnard, J, Cappione, A, Pugh-Bernard, AE, Felgar, RE, Looney, RJ; Sanz, I                                                                                                                                                                                                                                                                                                                                                                                                                                | 2004 |
| Assessment of the Effects of a DPP-4 Inhibitor (Sitagliptin) Januvia on Immune Function in Healthy Individuals                                                                                                                                                                             | NCT00813228                                                                                                                                                                                                                                                                                                                                                                                                                                                                                                             | 2008 |
| Long-term clinical effects of CFTR Co-therapy with Lumacaftor/Ivacaftor                                                                                                                                                                                                                    | De Boeck, C                                                                                                                                                                                                                                                                                                                                                                                                                                                                                                             | 2015 |
| Risk adjusted management of newly diagnosed high and intermediate flapi follicular lymphoma using (90)Y ibritumomab tiuxetan                                                                                                                                                               | Berinstein, , NL, Pennell, NM, Weerasinghe, R, Cheung, MC, Piliotis, E, Imrie, KR, Cussen, M-A, Buckstein, R, Ghorab, Z, Miles, E; Reis, MD                                                                                                                                                                                                                                                                                                                                                                             | 2016 |
| Role of cytomegalovirus in the expansion of CD4+CD28-T cells in patients with ANCA-associated vasculitis: a proof-of-concept, randomised controlled trial                                                                                                                                  | Chanouzas, , D, Sagmeister, M, Dyall, L, Nightingale, P, Ferro, C, Moss, P, Morgan, M; Harper, L                                                                                                                                                                                                                                                                                                                                                                                                                        | 2017 |
| Evaluation of the H1-Coil TMS- Double Blind Placebo Controlled Study in Adolescent Patients Suffering From Major Depression                                                                                                                                                                | NCT03541707                                                                                                                                                                                                                                                                                                                                                                                                                                                                                                             | 2018 |
| Individualized therapy for persistent asthma in young children                                                                                                                                                                                                                             | Fitzpatrick, , AM, Jackson, DJ, Mauger, DT, Boehmer, SJ, Phipatanakul, W, Sheehan, WJ, Moy, JN, Paul, IM, Bacharier, LB, Cabana, MD, Covar, R, Holguin, F, Lemanske, RF, Martinez, FD, Pongracic, JA, Beigelman, A, Baxi, SN, Benson, M, Blake, K, Chmiel, JF, Daines, CL, Daines, MO, Gaffin, JM, Gentile, DA, Gower, WA, Israel, E, Kumar, HV, Lang, JE, Lazarus, SC, Lima, JJ, Ly, N, Marbin, J, Morgan, W, Myers, RE, Olin, JT, Peters, SP, Raissy, HH, Robison, RG, Ross, K, Sorkness, CA, Thyne, SM; Szeffler, SJ | 2016 |
| Dose adjusted repoch in untreated de novo diffuse large B cell lymphoma-A single centre singapore experience                                                                                                                                                                               | Tso, , ACY, Sampath, VS; Ong, KH                                                                                                                                                                                                                                                                                                                                                                                                                                                                                        | 2016 |
| Is It Better to Use Ipilimumab Combined With a PD-1 Inhibitor or a PD-1 Inhibitor Alone as Initial Immunotherapy in Patients With Metastatic Melanoma?                                                                                                                                     | Espindola, , LMD, Salhab, RM, Dos Anjos, C, Garicochea, B; Munhoz, RR                                                                                                                                                                                                                                                                                                                                                                                                                                                   | 2017 |
| Repeated application of gene therapy in patients with cystic fibrosis                                                                                                                                                                                                                      | EUCTR2011-004761-33-GB                                                                                                                                                                                                                                                                                                                                                                                                                                                                                                  | 2011 |
| The effect of lacosamide in peripheral neuropathic pain: a randomized, double-blind, placebo-controlled, stratified beased on clinical characteristics                                                                                                                                     | EUCTR2018-003110-40-DK                                                                                                                                                                                                                                                                                                                                                                                                                                                                                                  | 2018 |
| A Randomized, Open Label, Multicenter, Phase III, 2-Arm Study of Androgen Deprivation with Leuprolide, +/- Docetaxel for Clinically Asymptomatic Prostate Cancer Subjects with a Rising PSA Following Definitive Local Therapy                                                             | EUCTR2007-000323-17-SK                                                                                                                                                                                                                                                                                                                                                                                                                                                                                                  | 2008 |
| Randomized study with a run-in feasibility phase to assess the added value of Clofarabine in combination with standard remission-induction chemotherapy in patients aged 18-65 years with previously untreated acute myeloid leukemia (AML) or myelodysplasia (MDS) (RAEB with IPSS = 1.5) | EUCTR2009-011613-24-NL                                                                                                                                                                                                                                                                                                                                                                                                                                                                                                  | 2009 |
| Study of the efficacy and safety indicators of two different iron chelators in patients with iron overload (Estudio de los indicadores de eficacia y seguridad de dos quelantes del hierro en pacientes con sobrecarga ferrica)                                                            | ISRCTN52984371                                                                                                                                                                                                                                                                                                                                                                                                                                                                                                          | 2011 |
| Clinical effectiveness and effect on COX-2 expression of the sequential treatment of actinic keratoses (AK) with photodynamic therapy (PDT) and diclofenac 3% gel: a phase IV clinical trial                                                                                               | EUCTR2013-000110-37-ES                                                                                                                                                                                                                                                                                                                                                                                                                                                                                                  | 2013 |
| To investigate whether treatment with the SGLT-2 inhibitor dapagliflozin improves the perception of hypoglycemia in people with type 1 diabetes with impaired awareness of hypoglycemia                                                                                                    | EUCTR2018-001569-17-NL                                                                                                                                                                                                                                                                                                                                                                                                                                                                                                  | 2018 |
| A Prospective randomised trial of sentinel node biopsy for high risk non-melanoma skin cancer                                                                                                                                                                                              | ACTRN12611000713998                                                                                                                                                                                                                                                                                                                                                                                                                                                                                                     | 2011 |
| This clinical research study will assess the effectiveness (how well it works), safety, tolerability (how well the body stands the drug) and blood levels of combined doses of BMS-663068, Raltegravir and Tenofovir                                                                       | EUCTR2011-000437-36-ES                                                                                                                                                                                                                                                                                                                                                                                                                                                                                                  | 2011 |
| GWMD09126 - GWP42003: GWP42004 antipsychotic(s) weight gain treatment                                                                                                                                                                                                                      | EUCTR2011-000180-28-GB                                                                                                                                                                                                                                                                                                                                                                                                                                                                                                  | 2011 |
| Risk-stratified randomized controlled trial in paediatric Crohn's Disease: methotrexate versus azathioprine or adalimumab for maintaining remission in patients at low or at high risk for aggressive disease course, respectively – a treatment strategy                                  | EUCTR2016-000522-18-PL                                                                                                                                                                                                                                                                                                                                                                                                                                                                                                  | 2018 |
| 14F7 in chronic B-cell lymphoproliferative syndrome                                                                                                                                                                                                                                        | RPCEC00000266                                                                                                                                                                                                                                                                                                                                                                                                                                                                                                           | 2018 |
| mRNA-transfected dendritic cell vaccination in high risk uveal melanoma patients - mRNA-DC vaccination in uveal melanoma                                                                                                                                                                   | EUCTR2008-001974-33-NL                                                                                                                                                                                                                                                                                                                                                                                                                                                                                                  | 2008 |
| TWO study: cell therapy trial in renal transplantation                                                                                                                                                                                                                                     | ISRCTN11038572                                                                                                                                                                                                                                                                                                                                                                                                                                                                                                          | 2018 |

|                                                                                                                                                                                                                                                                                                                                                                                                                        |                                                                                                                                                                                                                                                |      |
|------------------------------------------------------------------------------------------------------------------------------------------------------------------------------------------------------------------------------------------------------------------------------------------------------------------------------------------------------------------------------------------------------------------------|------------------------------------------------------------------------------------------------------------------------------------------------------------------------------------------------------------------------------------------------|------|
| A multicentre, multinational, double-blind, randomised, parallel group, placebo controlled trial of ethyl-EPA ethyl-Icosapent in patients with Huntington s Disease - ND                                                                                                                                                                                                                                               | EUCTR2005-002088-98-IT                                                                                                                                                                                                                         | 2006 |
| Combining a TLR9 agonist with broadly neutralizing antibodies for reservoir reduction and immunological control of HIV infection: an investigator-initiated randomized, placebo-controlled, phase IIa trial (TITAN)                                                                                                                                                                                                    | EUCTR2018-001165-16-DK                                                                                                                                                                                                                         | 2018 |
| Vitamin D action in the treatment of Depression and reduction of Cardiovascular Risk                                                                                                                                                                                                                                                                                                                                   | RBR-6yj8sj                                                                                                                                                                                                                                     | 2018 |
| Inhaler technology study                                                                                                                                                                                                                                                                                                                                                                                               | ISRCTN90986892                                                                                                                                                                                                                                 | 2017 |
| Effects of JAK inhibition on rheumatoid arthritis-related comorbidities: link between bone and vascular effects (investigator-initiated grant proposal)                                                                                                                                                                                                                                                                | EUCTR2015-002523-26-HU                                                                                                                                                                                                                         | 2015 |
| Impact of Tight blood Glucose Control within normal fasting ranges with insulin titration prescribed by the Leuven algorithm in adult critically ill patients                                                                                                                                                                                                                                                          | EUCTR2018-000756-17-BE                                                                                                                                                                                                                         | 2018 |
| Saline hypertonic in preschoolers and lung structure as measured by computed tomography                                                                                                                                                                                                                                                                                                                                | EUCTR2015-004143-39-NL                                                                                                                                                                                                                         | 2015 |
| A Phase IIa randomized, partially blinded trial of telaprevir (VX-950) in treatment-naïve subjects with chronic genotype 4 hepatitis C infection                                                                                                                                                                                                                                                                       | EUCTR2007-005281-12-FR                                                                                                                                                                                                                         | 2007 |
| ReBeL study: a randomized phase I/II trial of lenalidomide and rituximab with or without bendamustine in patients = 18 years with relapsed follicular lymphoma. A HOVON/GLSG study                                                                                                                                                                                                                                     | NTR3028                                                                                                                                                                                                                                        | 2011 |
| Multicenter, randomized, prospective study to establish the clinical efficacy and the mechanisms of tolerance following immunosuppression withdrawal in liver transplantation                                                                                                                                                                                                                                          | EUCTR2017-004983-37-ES                                                                                                                                                                                                                         | 2018 |
| Mediastinal large B-cell lymphoma: clinical and immunohistological findings in 18 patients treated with different third-generation regimens                                                                                                                                                                                                                                                                            | Falini, , B, Venturi, S, Martelli, M, Santucci, A, Pileri, S, Pescarmona, E, Giovannini, M, Mazza, P, Martelli, MF; Pasqualucci, L                                                                                                             | 1995 |
| MULTICENTER STUDY WITH RANDOM DISTRIBUTION OF TWO TREATMENTS USED IN PARALLEL TO DEMONSTRATE THE EFFICACY AND SAEFTY OF A SOLUTION OF CLODRONATE 200mg / 4 ml ADMINISTRED INTRAMUSCULARLY ONCE EVERY TWO WEEKS WITH 1% LIDOCAINE VS CLODRONATE 100 MG/3,3ML ADMINISTRED INTRAMUSCOLARY ONCE A WEEK WITH 1% LIDOCAINE IN OF WOMEN WITH POSTMENOPAUSAL OSTEOPOROSIS                                                      | EUCTR2010-022060-13-IT                                                                                                                                                                                                                         | 2011 |
| Eplerenone in Metabolic Syndrome: an investigation into the effects of Eplerenone on perivascular adipose tissue and small artery tone in obesity - Eplerenone in Metabolic Syndrome                                                                                                                                                                                                                                   | EUCTR2010-022308-34-GB                                                                                                                                                                                                                         | 2011 |
| Low-dose agalsidase beta treatment in male pediatric patients with Fabry disease: a 5-year randomized controlled trial                                                                                                                                                                                                                                                                                                 | Ramaswami, , U, Bichet, DG, Clarke, LA, Dostalova, G, Fainboim, A, Fellgiebel, A, Forcelini, CM, An Haack, K, Hopkin, RJ, Mauer, M, Najafian, B, Scott, CR, Shankar, SP, Thurberg, BL, Tondel, C, Tylki-Szymanska, A, Benichou, B; Wijburg, FA | 2019 |
| Clinical efficacy and safety of R0002 cream in the initial and maintenance therapies of lamellar ichthyosis (LI)                                                                                                                                                                                                                                                                                                       | ISRCTN62315004                                                                                                                                                                                                                                 | 2011 |
| A Phase I/II, Ascending, Multi-Dose Study of BMS-663513, An Agonistic Anti-CD137 Monoclonal Antibody, Administered Every Three Weeks to Patients with Metastatic or Locally Advanced Solid Malignancies. Revised Protocol Number 07, incorporating Amendments 01, 02, 03, 04, 05, 06, 07 and Administrative Letter Dated 10-Mar-2006                                                                                   | EUCTR2007-000416-91-FR                                                                                                                                                                                                                         | 2007 |
| Study of the efficacy and safety of the combination of rituximab and CMC544 with rituximab, gemcitabine and oxaliplatin in diffuse large B-cell lymphoma at first or second relapse                                                                                                                                                                                                                                    | EUCTR2011-003849-18-BE                                                                                                                                                                                                                         | 2012 |
| The randomized controlled trial of comparing the efficacy of pegaspargase+CHOP regimen or Hyper-CVAD regimen in the incipient peripheral T-cell lymphoma                                                                                                                                                                                                                                                               | ChiCTR-TRC-14004426                                                                                                                                                                                                                            | 2014 |
| A PHASE 2B RANDOMIZED, ACTIVE-CONTROLLED, STAGED, OPEN-LABEL TRIAL TO INVESTIGATE SAFETY AND EFFICACY OF BMS-955176 IN COMBINATION WITH DOLUTEGRAVIR AND ATAZANAVIR (WITH OR WITHOUT RITONAVIR) IN TREATMENT-EXPERIENCED HIV-1 INFECTED ADULTS                                                                                                                                                                         | PER-019-15                                                                                                                                                                                                                                     | 2015 |
| ACT-1 (younger patients) A randomized phase III study to evaluate the efficacy of chemoimmunotherapy with the monoclonal antibody Campath-1H (Alemtuzumab) given in combination with 2-weekly CHOP versus 2-weekly CHOP alone and consolidated by autologous stem cell transplant, in young patients with previously untreated systemic peripheral T-cell lymphomas - ACT-1 ( Alemtuzumab and CHOP in T-cell lymphoma) | EUCTR2006-006130-17-PT                                                                                                                                                                                                                         | 2008 |
| Double-blind crossover trial of trimethoprim-sulfamethoxazole in spinocerebellar ataxia type 3/Machado-Joseph disease                                                                                                                                                                                                                                                                                                  | Schulte, , T, Mattern, R, Berger, K, Szymanski, S, Klotz, P, Kraus, PH, Przuntek, H; Schöls, L                                                                                                                                                 | 2001 |
| MARCH                                                                                                                                                                                                                                                                                                                                                                                                                  | EUCTR2011-002107-15-IE                                                                                                                                                                                                                         | 2011 |
| A phase II study of Nivolumab for relapsed/refractory adult T-cell leukemia/lymphoma (ATL)                                                                                                                                                                                                                                                                                                                             | JPRN-UMIN000020601                                                                                                                                                                                                                             | 2016 |
| Long Term Administration of Inhaled Mannitol in Cystic Fibrosis – A Safety and Efficacy Trial in Adult Cystic Fibrosis Subjects                                                                                                                                                                                                                                                                                        | EUCTR2013-005357-79-CZ                                                                                                                                                                                                                         | 2014 |

|                                                                                                                                                                                                                                                                                                                                                                                                                     |                        |      |
|---------------------------------------------------------------------------------------------------------------------------------------------------------------------------------------------------------------------------------------------------------------------------------------------------------------------------------------------------------------------------------------------------------------------|------------------------|------|
| A Phase III, Multicenter, Placbo-Controlled, Double-Blind, Randomized Clinical Trial to Evaluate the Efficacy of Bevacizumab in Combination with Tarceva (erlotinib) Compared With Tarceva Alone For Treatment of Advanced Non-Small Cell Lung Cancer (NSCLC) After Failure of Standard First-Line Chemotherapy                                                                                                     | EUCTR2006-006626-26-SE | 2007 |
| Study of the safety and effectiveness of drug AZD4017 at reducing pressure in the brain, in idiopathic intracranial hypertension                                                                                                                                                                                                                                                                                    | EUCTR2013-003643-31-GB | 2013 |
| Osteopathic effects in patients with heart disease                                                                                                                                                                                                                                                                                                                                                                  | RBR-3st9f3             | 2015 |
| A 36 wk three-center double-blind randomized three-way cross-over trial comparing metabolic effects of candesartan, hydrochlorothiazide and placebo. The MEDICA study Mechanisms for the diabetes-preventing effect of candesartan - The MEDICA study                                                                                                                                                               | EUCTR2004-005013-11-SE | 2004 |
| Topical ionic contra-viral therapy in actinic keratosis                                                                                                                                                                                                                                                                                                                                                             | EUCTR2018-000034-36-NL | 2018 |
| THE ROLE OF HYPERGLYCEMIA, HYPERINSULINEMIA AND ELEVATED FREE FATTY ACIDS FOR CARDIAC FUNCTION IN PATIENTS WITH TYPE 2 DIABETES                                                                                                                                                                                                                                                                                     | EUCTR2017-002101-35-DK | 2017 |
| Selected mesenchymal stromal cells to reduce liver inflammation                                                                                                                                                                                                                                                                                                                                                     | ISRCTN73586959         | 2017 |
| A prospective phase I/II study to evaluate allogeneic mesenchymal stromal cells for the treatment of skin disease in children with recessive dystrophic epidermolysis bullosa                                                                                                                                                                                                                                       | EUCTR2012-001394-87-GB | 2012 |
| HIV Reservoir Dynamics After Switching To Dolutegravir in Patients on a PI/r Based Regimen. A Phase IV Open Randomized Trial                                                                                                                                                                                                                                                                                        | EUCTR2014-004331-39-ES | 2014 |
| Efficacy of melatonin in rapid eye movement (REM sleep) behaviour disorder with coexisting Parkinsonism                                                                                                                                                                                                                                                                                                             | ACTRN12613000648729    | 2013 |
| A clinical trial looking at the safety and effectiveness of a new drug for inhalation, looking to treat Alpha-1 Antitrypsin Deficient Patients with Emphysema                                                                                                                                                                                                                                                       | EUCTR2008-005326-36-DK | 2009 |
| A randomised, open-label study to evaluate the efficacy and safety of maraviroc (MVC) as a switch for either nucleoside or nucleotide analogue reverse transcriptase inhibitors (N(t)RTI) or boosted protease inhibitors (PI/r) in HIV-1 infected individuals with stable, well-controlled plasma HIV-RNA while taking their first N(t)RTI + PI/r regimen of combination antiretroviral therapy (cART): MARCH study | ACTRN12611000816954    | 2011 |
| Optimal pathway for treating neuropathic pain in diabetes mellitus                                                                                                                                                                                                                                                                                                                                                  | EUCTR2016-003146-89-GB | 2018 |
| Double-Blind, parallel-group comparison, investigators initiated phase II clinical trial of IDEC-C2B8 (Rituximab) in patients with Systemic Sclerosis                                                                                                                                                                                                                                                               | JPRN-UMIN000030139     | 2017 |
| Effects of exercise training on the human body                                                                                                                                                                                                                                                                                                                                                                      | RBR-3yxd4              | 2016 |
| Proof of biological activity of SAR100842 in Systemic Sclerosis                                                                                                                                                                                                                                                                                                                                                     | EUCTR2012-001369-34-IT | 2012 |
| T4 immunotherapy of head and neck cancer                                                                                                                                                                                                                                                                                                                                                                            | ISRCTN81726461         | 2015 |
| A Phase II Study of Intravenous CNTO328 in Patients with Recurrent Epithelial Ovarian Cancer - CNTO328 in ovarian cancer                                                                                                                                                                                                                                                                                            | EUCTR2006-005704-13-GB | 2007 |
| A Phase I/II clinical study of IMA970A plus CV8102 and Cyclophosphamide for patients with liver cancer                                                                                                                                                                                                                                                                                                              | EUCTR2015-003389-10-DE | 2017 |
| Comparing treatments for severe chronic hand eczema                                                                                                                                                                                                                                                                                                                                                                 | EUCTR2014-004741-27-GB | 2015 |
| A clinical study to test how safe, tolerable and effective MT-8554 is for patients with Painful Diabetic Peripheral Neuropathy                                                                                                                                                                                                                                                                                      | EUCTR2016-002571-10-HU | 2017 |
| Strength Training for patients with Parkinson's Disease identified by a biochemical examination                                                                                                                                                                                                                                                                                                                     | RBR-36cw3y             | 2017 |
| A study to compare masitinib with dexamethasone and gemcitabine in the treatment of patients with relapsed or refractory peripheral T-cell lymphoma                                                                                                                                                                                                                                                                 | EUCTR2010-021091-28-SK | 2015 |
| Phase II trial in platinum-refractory ovarian cancer: a randomized multicenter trial with SU11248 to evaluate dosage, tolerability, toxicity and effectiveness of a multitargeted receptor tyrosine kinase inhibitor monotherapy                                                                                                                                                                                    | EUCTR2007-003089-16-DE | 2008 |
| Efficacy and safety of canakinumab in patients with Schnitzler syndrome                                                                                                                                                                                                                                                                                                                                             | EUCTR2010-024156-28-DE | 2011 |
| Clinical trial with L-asparaginase encapsulated in erythrocytes in patients affected by metastatic pancreatic cancer after first line treatment                                                                                                                                                                                                                                                                     | EUCTR2013-004262-34-FR | 2014 |
| Comparison of short infusion versus prolonged infusion of ceftolozane-tazobactam among patients with ventilator associated-pneumonia to Pseudomonas aeruginosa in intensive care units                                                                                                                                                                                                                              | EUCTR2018-000059-42-FR | 2018 |
| Belimumab after B Cell depletion therapy as a new treatment for patients with systemic lupus erythematosus (SLE)                                                                                                                                                                                                                                                                                                    | ISRCTN47873003         | 2016 |
| PPI in secondary hemochromatosis                                                                                                                                                                                                                                                                                                                                                                                    | EUCTR2017-003777-34-NL | 2018 |
| overall survival of patients with recurrent ovarian, primary peritoneal or fallopian tube cancers of BRCA mutated or BRCAness phenotype treated with trabectedin compared to a standard treatment                                                                                                                                                                                                                   | EUCTR2015-004472-30-IT | 2017 |
| Personalized treatment of functional dyspepsia with nortriptyline                                                                                                                                                                                                                                                                                                                                                   | EUCTR2017-003307-21-NL | 2017 |

|                                                                                                                                                                                                                             |                                                                                                                                                                                                           |      |
|-----------------------------------------------------------------------------------------------------------------------------------------------------------------------------------------------------------------------------|-----------------------------------------------------------------------------------------------------------------------------------------------------------------------------------------------------------|------|
| Proof of concept trial of the role of clopidogrel in preventing allergen induced inflammation in asthma                                                                                                                     | EUCTR2012-003698-25-GB                                                                                                                                                                                    | 2012 |
| Efficacité et Tolérance de la Plitidepsine chez les patients souffrant d'un liposarcome différencié (DLPS) avancé, non opérable ou métastatique, en rechute/réfractaire : une étude exploratoire multicentrique de phase II | EUCTR2009-010980-18-FR                                                                                                                                                                                    | 2009 |
| Periodontitis treatment in patients with rheumatoid arthritis and high clinical activity in the. Randomized clinical trial                                                                                                  | EUCTR2017-003259-40-ES                                                                                                                                                                                    | 2017 |
| Capecitabine oral chemotherapy with radium-223 in breast cancer patients with bone metastases (CARBON)                                                                                                                      | ISRCTN92755158                                                                                                                                                                                            | 2016 |
| A phase II double-blind, randomised, placebo-controlled trial of neuroprotection with phenytoin in acute optic neuritis                                                                                                     | Raftopoulos, , RE, Hickman, S, Toosy, A, Wheeler-Kingshott, CA, Altmann, D, Schmierer, K, Sharrack, B, Sheridan, R, Giovannoni, G, Miller, DH; Kapoor, R                                                  | 2012 |
| The effect of mud pack therapy on serum YKL-40 and hsCRP levels in patients with knee osteoarthritis                                                                                                                        | Güngen, , G, Ardic, F, Findikoğlu, G; Rota, S                                                                                                                                                             | 2012 |
| MR and CT imaging characteristics and ablation zone volumetry of locally advanced pancreatic cancer treated with irreversible electroporation                                                                               | Vroomen, , LGPH, Scheffer, HJ, Melenhorst, MCAM, de Jong, MC, van den Bergh, JE, van Kuijk, C, van Delft, F, Kazemier, G; Meijerink, MR                                                                   | 2017 |
| The role of circulating HPV-16 DNA detection in HNSCC patients treated by definitive radiation or chemo-radiation                                                                                                           | Hajduk, , AB, Rutkowski, T, Mazurek, A; Skladowski, K                                                                                                                                                     | 2015 |
| Peripheral parameters of oxidative stress in patients with infiltrative Graves' ophthalmopathy treated with corticosteroids                                                                                                 | Bednarek, , J, Wysocki, H; Sowiński, J                                                                                                                                                                    | 2004 |
| Anorexia nervosa treatment: a systematic review of randomized controlled trials                                                                                                                                             | Bulik, , CM, Berkman, ND, Brownley, KA, Sedway, JA; Lohr, KN                                                                                                                                              | 2007 |
| Evaluation of a commercial web-based weight loss and weight loss maintenance program in overweight and obese adults: a randomized controlled trial                                                                          | Collins, , CE, Morgan, PJ, Jones, P, Fletcher, K, Martin, J, Aguiar, EJ, Lucas, A, Neve, M, McElduff, P; Callister, R                                                                                     | 2010 |
| Switch Rates During Acute Treatment for Bipolar II Depression With Lithium, Sertraline, or the Two Combined: a Randomized Double-Blind Comparison                                                                           | Altshuler, , LL, Sugar, CA, McElroy, SL, Calimlim, B, Gitlin, M, Keck, PE, Aquino-Elias, A, Martens, BE, Fischer, EG, English, TL, Roach, J; Suppes, T                                                    | 2017 |
| Relation between augmentation index and adiponectin during one-year metformin treatment for nonalcoholic steatohepatitis: effects beyond glucose lowering?                                                                  | Shargorodsky, , M, Omelchenko, E, Matas, Z, Boaz, M; Gavish, D                                                                                                                                            | 2012 |
| Thalidomide treatment for prurigo nodularis in human immunodeficiency virus-infected subjects: efficacy and risk of neuropathy                                                                                              | Maurer, , T, Poncelet, A; Berger, T                                                                                                                                                                       | 2004 |
| Dapagliflozin maintains glycaemic control while reducing weight and body fat mass over 2 years in patients with type 2 diabetes mellitus inadequately controlled on metformin                                               | Bolinder, , J, Ljunggren, Ö, Johansson, L, Wilding, J, Langkilde, AM, Sjöström, CD, Sugg, J; Parikh, S                                                                                                    | 2014 |
| Flaxseed Lignan-Enriched Complex (FLC) for the Treatment of Patients With Ulcerative Colitis (UC): a Pilot Assessment                                                                                                       | NCT02201758                                                                                                                                                                                               | 2014 |
| Pantoprazole rapidly improves health-related quality of life in patients with heartburn: a prospective, randomized, double blind comparative study with nizatidine                                                          | Paré, , P, Armstrong, D, Pericak, D; Pyzyk, M                                                                                                                                                             | 2003 |
| Abstracts from the International Combined Meeting BHS-SIdA                                                                                                                                                                  |                                                                                                                                                                                                           | 2015 |
| Changes in inflammatory mediators in gingival crevicular fluid following periodontal disease treatment in pregnancy: relationship to adverse pregnancy outcome                                                              | Penova-Veselinovic, , B, Keelan, JA, Wang, CA, Newnham, JP; Pennell, CE                                                                                                                                   | 2015 |
| A randomized, phase 2 trial of Docetaxel with or without PX-866, an irreversible oral phosphatidylinositol 3-kinase inhibitor, in patients with relapsed or metastatic non-small-cell lung cancer                           | Levy, , B, Spira, A, Becker, D, Evans, T, Schnadig, I, Camidge, DR, Bauman, JE, Hausman, D, Walker, L, Nemunaitis, J, Rudin, CM, Halmos, B; Bowles, DW                                                    | 2014 |
| Effect of Long Term $\alpha$ -Lipoic Acid Treatment on Endothelial Function in Patients With Type 2 Diabetes                                                                                                                | NCT00490867                                                                                                                                                                                               | 2007 |
| Montelukast reduces serum levels of eosinophil-derived neurotoxin in preschool asthma                                                                                                                                       | Kim, , C-K, Callaway, Z, Park, J-S, Nishimori, H, Ogino, T, Nagao, M; Fujisawa, T                                                                                                                         | 2018 |
| Clinical outcome and atherothrombotic risk profile after prolonged wash-out following long-term treatment with high doses of n-3 PUFAs in patients with an acute myocardial infarction                                      | Grundt, , H, Nilsen, DW, Hetland, Ø; Mansoor, MA                                                                                                                                                          | 2004 |
| Motivational Interviewing and Cognitive Behavioural Therapy for Generalized Anxiety Disorder                                                                                                                                | NCT01488799                                                                                                                                                                                               | 2011 |
| Probiotic dietary supplementation in patients with stage 3 and 4 chronic kidney disease: a 6-month pilot scale trial in Canada                                                                                              | Ranganathan, , N, Friedman, EA, Tam, P, Rao, V, Ranganathan, P; Dheer, R                                                                                                                                  | 2009 |
| Maternal-fetal outcomes of lamivudine treatment administered during late pregnancy to highly viremic mothers with HBeAg+ chronic hepatitis B                                                                                | Jiang, , HX, Han, GR, Wang, CM; Ji, Y                                                                                                                                                                     | 2012 |
| Efficacy of controlled-release niacin in treatment of metabolic syndrome: correlation to surrogate markers of atherosclerosis, vascular reactivity, and inflammation                                                        | Vaccari, , CS, Nagamia, S, Thoenes, M, Oguchi, A, Hammoud, R; Khan, BV                                                                                                                                    | 2007 |
| Oxidative stress in hemodialysis patients receiving intravenous iron therapy and the role of N-acetylcysteine in preventing oxidative stress                                                                                | Swarnalatha, , G, Ram, R, Neela, P, Naidu, MU; Dakshina Murty, KV                                                                                                                                         | 2010 |
| Assessment of glomerular filtration rate based on alterations of serum brain-derived neurotrophic factor in type 2 diabetic subjects treated with amlodipine/benazepril or valsartan/hydrochlorothiazide                    | Lee, , I-T, Sheu, WH-H, Hung, Y-J, Chen, J-F, Wang, C-Y; Lee, W-J                                                                                                                                         | 2015 |
| Effects of an antioxidant-enriched multivitamin supplement on inflammation and oxidative stress in CF                                                                                                                       | Sagel, , SD, Baines, A, Abdulhamid, I, Borowitz, D, Clancy, JP, Daines, C, Dunitz, JM, Graff, GR, Jain, R, Livingston, F, McCoy, KS, Noe, J, Orenstein, DM, Rock, MJ, Slovis, BS, Strausbaugh, S; Khan, U | 2016 |

|                                                                                                                                                                                                          |                                                                                                                                                                                                                                                                                                                                                                                          |      |
|----------------------------------------------------------------------------------------------------------------------------------------------------------------------------------------------------------|------------------------------------------------------------------------------------------------------------------------------------------------------------------------------------------------------------------------------------------------------------------------------------------------------------------------------------------------------------------------------------------|------|
| Usefulness of HFA-BDP for adult patients with bronchial asthma: randomized crossover study with fluticasone                                                                                              | Horiguchi, , T, Hayashi, N, Ohira, D, Torigoe, H, Ito, T, Hirose, M, Sasaki, Y, Shiga, M, Miyazaki, J, Kondo, R; Tachikawa, S                                                                                                                                                                                                                                                            | 2006 |
| A double-blind, randomized, placebo-controlled trial evaluating safety and efficacy of an ayurvedic botanical formulation in reducing menopausal symptoms in otherwise healthy women                     | Steels, , E, Steele, M, Harold, M, Adams, L; Coulson, S                                                                                                                                                                                                                                                                                                                                  | 2018 |
| Clinical trials for drugs against diabetic neuropathy: can we combine scientific needs with clinical practicalities?                                                                                     | Ziegler, , D; Luft, D                                                                                                                                                                                                                                                                                                                                                                    | 2002 |
| Longitudinal Antimalarial Combinations in Uganda                                                                                                                                                         | NCT00123552                                                                                                                                                                                                                                                                                                                                                                              | 2005 |
| PRECREST: a phase II prevention and biomarker trial of creatine in at-risk Huntington disease                                                                                                            | Rosas, , HD, Doros, G, Gevorkian, S, Malarick, K, Reuter, M, Coutu, JP, Triggs, TD, Wilkens, PJ, Matson, W, Salat, DH; Hersch, SM                                                                                                                                                                                                                                                        | 2014 |
| Azithromycin for episodes with asthma-like symptoms in young children aged 1-3 years: a randomised, double-blind, placebo-controlled trial                                                               | Stokholm, , J, Chawes, BL, Vissing, NH, Bjarnadottir, E, Pedersen, TM, Vinding, RK, Schoos, A-MM, Wolsk, HM, Thorsteinsdottir, S, Hallas, HW, Arianto, L, Schjorring, S, Krogfelt, KA, Fischer, TK, Pipper, CB, Bonnelykke, K; Bisgaard, H                                                                                                                                               | 2016 |
| Acute effects of continous positive airway pressure (CPAP)in hemodynamics and cardiac performance in patients with hypertrophic cardiomyopathy                                                           | Nerbass, , FB, Pedrosa, RP, Ferreira Filho, JA, Salemi, VMC, Arteaga-Fernandez, E, Drager, LF; Lorenzi-Filho, G                                                                                                                                                                                                                                                                          | 2013 |
| Effects of triple antioxidant therapy on measures of cardiovascular autonomic neuropathy and on myocardial blood flow in type 1 diabetes: a randomised controlled trial                                  | Pop-Busui, , R, Stevens, MJ, Raffel, DM, White, EA, Mehta, M, Plunkett, CD, Brown, MB; Feldman, EL                                                                                                                                                                                                                                                                                       | 2013 |
| Joalis Analerg Bambi - Alimentary supplement in the treatment of allergic diseases (Multicentric double blind, placebo-controlled study)                                                                 | Bystron, , J, Kopriwa, F; Smekalova, A                                                                                                                                                                                                                                                                                                                                                   | 2002 |
| Intrahepatic G-CSF stimulated autologous bone marrow stem cell transplantation versus standard of care in patients with decompensated alcoholic liver disease: a randomised study                        | Chalandon, , Y, Terraz, S, Kindler, V, Passweg, J, Rubbia-Brandt, L, Hadengue, A; Spahr, L                                                                                                                                                                                                                                                                                               | 2012 |
| The benefits and tolerance of exercise in myasthenia gravis (MGEX): study protocol for a randomised controlled trial                                                                                     | Birnbaum, , S, Hogrel, J-Y, Porcher, R, Portero, P, Clair, B, Eymard, B, Demeret, S, Bassez, G, Gargiulo, M, Berrih-Aknin, S, Jobic, A, Aegerter, P, Thoumie, P, Sharshar, T, Behin, A, Bolgert, F, Younes, ND-A, Domingo, N-Y, Friedman, D, Frenkian, M, Laforet, P, Ledoux, I, Louet, E, Mendelson, J, Misdrahi, S, Bedos, CO, Rohaut, B, Soler, E, Truffault, F, Weiss, N; William, L | 2018 |
| Effect of exercise training on postexercise oxygen uptake kinetics in patients with reduced ventricular function                                                                                         | Myers, , J, Gianrossi, R, Schwitter, J, Wagner, D; Dubach, P                                                                                                                                                                                                                                                                                                                             | 2001 |
| Endocan, a novel marker of endothelial dysfunction in patients with essential hypertension: comparative effects of amlodipine and valsartan                                                              | Celik, , T, Balta, S, Karaman, M, Ahmet Ay, S, Demirkol, S, Ozturk, C, Dinc, M, Unal, HU, Yılmaz, MI, Kılıc, S, Kurt, G, Tas, A, Iyisoy, A, Quarti-Trevano, F, Fici, F; Grassi, G                                                                                                                                                                                                        | 2015 |
| A randomized, controlled, molecular study of condylomata acuminata clearance during treatment with imiquimod                                                                                             | Tyring, , SK, Arany, I, Stanley, MA, Tomai, MA, Miller, RL, Smith, MH, McDermott, DJ; Slade, HB                                                                                                                                                                                                                                                                                          | 1998 |
| The Randomized Olmesartan and Diabetes Microalbuminuria Prevention (ROADMAP) observational follow-up study: benefits of RAS blockade with olmesartan treatment are sustained after study discontinuation | Menne, , J, Ritz, E, Ruilope, LM, Chatzikyrkou, C, Viberti, G; Haller, H                                                                                                                                                                                                                                                                                                                 | 2014 |
| The combined effect of Parathyroid hormone (1-34) and whole-body Vibration exercise in the treatment of Osteoporosis (PaVOS)- study protocol for a randomized controlled trial                           | Jepsen, , DB, Ryg, J, Jorgensen, NR, Hansen, S; Masud, T                                                                                                                                                                                                                                                                                                                                 | 2018 |
| Effects of ginger on serum glucose, advanced glycation end products, and inflammation in peritoneal dialysis patients                                                                                    | Imani, , H, Tabibi, H, Najafi, I, Atabak, S, Hedayati, M; Rahmani, L                                                                                                                                                                                                                                                                                                                     | 2015 |
| A systematic review: thiopurine monitoring in children with inflammatory bowel disease                                                                                                                   | Konidari, , A, Anagnostopoulos, A, Bonnett, LJ, Pirmohamed, M; El Matary, W                                                                                                                                                                                                                                                                                                              | 2013 |
| Peripheral CD5+ B cells in antineutrophil cytoplasmic antibody-associated vasculitis                                                                                                                     | Unizony, , S, Lim, N, Phippard, DJ, Carey, VJ, Miloslavsky, EM, Tchao, NK, Iklé, D, Asare, AL, Merkel, PA, Monach, PA, Seo, P, St Clair, EW, Langford, CA, Spiera, R, Hoffman, GS, Kallenberg, CG, Specks, U; Stone, JH                                                                                                                                                                  | 2015 |
| The Effects of Testosterone Supplementation on Cognitive Functioning in Older Men                                                                                                                        | Wahjoepramono, , EJ, Asih, PR, Aniwiyanti, V, Taddei, K, Dhaliwal, SS, Fuller, SJ, Foster, J, Carruthers, M, Verdile, G, Sohrabi, HR; Martins, RN                                                                                                                                                                                                                                        | 2016 |
| Maternal plasma interleukin-6, interleukin-1β and C-reactive protein as indicators of tocolysis failure and neonatal outcome after preterm delivery                                                      | Skrablin, , S, Lovric, H, Banovic, V, Kralik, S, Dijakovic, A; Kalafatic, D                                                                                                                                                                                                                                                                                                              | 2007 |
| Triple pharmacological blockade of the renin-angiotensin-aldosterone system in nondiabetic CKD: an open-label crossover randomized controlled trial                                                      | Tylicki, , L, Rutkowski, P, Renke, M, Larczyński, W, Aleksandrowicz, E, Lysiak-Szydłowska, W; Rutkowski, B                                                                                                                                                                                                                                                                               | 2008 |
| Prevention of myocardial damage during coronary intervention                                                                                                                                             | Pasceri, , V, Patti, G; Di Sciascio, G                                                                                                                                                                                                                                                                                                                                                   | 2006 |
| Antioxidant-rich dietary intervention for improving asthma control in pregnancies complicated by asthma: study protocol for a randomized controlled trial                                                | Grieger, , JA, Wood, LG; Clifton, VL                                                                                                                                                                                                                                                                                                                                                     | 2014 |
| Pioneer study: pPARgamma activation results in overall improvement of clinical and metabolic markers associated with insulin resistance independent of long-term glucose control                         | Pfützner, , A, Hohberg, C, Lübben, G, Pahler, S, Pfützner, AH, Kann, P; Forst, T                                                                                                                                                                                                                                                                                                         | 2005 |
| Angiotensinogen gene M235T polymorphism and reduction in wall thickness in response to antihypertensive treatment                                                                                        | Bozec, , E, Fassot, C, Tropeano, AI, Boutouyrie, P, Jeunemaitre, X, Lacolley, P, Dabire, H; Laurent, S                                                                                                                                                                                                                                                                                   | 2003 |
| Control Crohn Safe Trial                                                                                                                                                                                 | NCT03917303                                                                                                                                                                                                                                                                                                                                                                              | 2019 |
| Attention deficit and hyperactivity disorder scores are elevated and respond to N-acetylcysteine treatment in patients with systemic lupus erythematosus                                                 | Garcia, , RJ, Francis, L, Dawood, M, Lai, ZW, Faraone, SV; Perl, A                                                                                                                                                                                                                                                                                                                       | 2013 |

|                                                                                                                                                                                                                            |                                                                                                                                                                                                                                                                                                      |      |
|----------------------------------------------------------------------------------------------------------------------------------------------------------------------------------------------------------------------------|------------------------------------------------------------------------------------------------------------------------------------------------------------------------------------------------------------------------------------------------------------------------------------------------------|------|
| Development and evaluating multimarker models for guiding treatment decisions                                                                                                                                              | Tajik, , P, Zafarmand, MH, Zwinderman, AH, Mol, BW; Bossuyt, PM                                                                                                                                                                                                                                      | 2018 |
| Final analysis of the prospective WSG-AGO EC-Doc versus FEC phase III trial in intermediate-risk (pN1) early breast cancer: efficacy and predictive value of Ki67 expression                                               | Nitz, , U, Gluz, O, Huober, J, Kreipe, HH, Kates, RE, Hartmann, A, Erber, R, Moustafa, Z, Scholz, M, Lisboa, B, Mohrmann, S, Möbus, V, Augustin, D, Hoffmann, G, Weiss, E, Böhmer, S, Kreienberg, R, Du Bois, A, Sattler, D, Thomssen, C, Kiechle, M, Jänicke, F, Wallwiener, D, Harbeck, N; Kuhn, W | 2014 |
| Changes in Inflammatory and Bone Turnover Markers After Periodontal Disease Treatment in Patients With Diabetes                                                                                                            | Izuora, , KE, Ezeanolue, EE, Neubauer, MF, Gewelber, CL, Allenback, GL, Shan, G; Umpierrez, GE                                                                                                                                                                                                       | 2016 |
| The clinical benefit of adjunctive dexamethasone in tuberculous meningitis is not associated with measurable attenuation of peripheral or local immune responses                                                           | Simmons, , CP, Thwaites, GE, Quyen, NT, Chau, TT, Mai, PP, Dung, NT, Stepniewska, K, White, NJ, Hien, TT; Farrar, J                                                                                                                                                                                  | 2005 |
| QTc duration is independently associated with tissue palmitoleic acid levels but is not affected by omega-3 fatty acid treatment in patients with non-alcoholic fatty liver disease and features of the metabolic syndrome | Palmer, , CE, Scorletti, E, Clough, GF, McCormick, KG, Bhatia, L, Targher, G, Curzen, NP, Calder, PC; Byrne, CD                                                                                                                                                                                      | 2014 |
| Empagliflozin reduces markers of arterial stiffness, vascular resistance and cardiac workload in empa-reg outcome                                                                                                          | Chilton, , RJ, Gullestad, L, Fitchett, D, Inzucchi, SE, Mattheus, M, Woerle, HJ; Johansen, OE                                                                                                                                                                                                        | 2016 |
| Long-term creatine supplementation is safe in aged patients with Parkinson disease                                                                                                                                         | Bender, , A, Samtleben, W, Elstner, M; Klopstock, T                                                                                                                                                                                                                                                  | 2008 |
| Iron supplementation in premature infants using the zinc protoporphyrin to heme ratio: short- and long-term outcomes                                                                                                       | Miller, SM                                                                                                                                                                                                                                                                                           | 2013 |
| PHAGE Study: bacteriophages as Novel Prebiotics                                                                                                                                                                            | NCT03269617                                                                                                                                                                                                                                                                                          | 2017 |
| Short-Term, High-Dose Fish Oil Supplementation Increases the Production of Omega-3 Fatty Acid-Derived Mediators in Patients With Peripheral Artery Disease (the OMEGA-PAD I Trial)                                         | Grenon, , SM, Owens, CD, Nosova, EV, Hughes-Fulford, M, Alley, HF, Chong, K, Perez, S, Yen, PK, Boscardin, J, Hellmann, J, Spite, M; Conte, MS                                                                                                                                                       | 2015 |
| T2 relaxometry helps prognosticate seizure outcome in patients with solitary cerebral cysticercosis                                                                                                                        | de Souza, , A, Nalini, A, Saini, J; Thennarasu, K                                                                                                                                                                                                                                                    | 2017 |
| Low-dose theophylline in childhood asthma: a placebo-controlled, double-blind study                                                                                                                                        | Suessmuth, , S, Freihorst, J; Gappa, M                                                                                                                                                                                                                                                               | 2003 |
| Clinical features and outcomes of focal segmental glomerulosclerosis pathologic variants in Korean adult patients                                                                                                          | Kwon, , YE, Han, SH, Kie, JH, An, SY, Kim, YL, Park, KS, Nam, KH, Leem, AY, Oh, HJ, Park, JT, Chang, TI, Kang, EW, Kang, SW, Choi, KH, Lim, BJ, Jeong, HJ; Yoo, TH                                                                                                                                   | 2014 |
| Does vitamin D administered to children with asthma treated with inhaled glucocorticoids affect short-term growth or bone turnover?                                                                                        | Schou, , AJ, Heuck, C; Wolthers, OD                                                                                                                                                                                                                                                                  | 2003 |
| Effects of late acute rejection on graft survival and outcome in pediatric renaltransplant recipients                                                                                                                      | Baskin, , E, Kantar, A, Gulleroglu, K, Ozmen, E, Ozdemir, H, Kirnap, M, Moray, G; Haberal, M                                                                                                                                                                                                         | 2015 |
| Effects of nonsurgical periodontal therapy on C-reactive protein and serum lipids in Jordanian adults with advanced periodontitis                                                                                          | Kamil, , W, Al Habashneh, R, Khader, Y, Al Bayati, L; Taani, D                                                                                                                                                                                                                                       | 2011 |
| Drospirenone/ethinyl estradiol versus rosiglitazone treatment in overweight adolescents with polycystic ovary syndrome: comparison of metabolic, hormonal, and cardiovascular risk factors                                 | Tfayli, , H, Ulnach, JW, Lee, S, Sutton-Tyrrell, K; Arslanian, S                                                                                                                                                                                                                                     | 2011 |
| Pharmacokinetics of miltefosine in children and adults with Cutaneous leishmaniasis                                                                                                                                        | Del Mar Castro, , M, Gomez, MA, Kip, AE, Cossio, A, Ortiz, E, Navas, A, Dorlo, TPC; Saravia, NG                                                                                                                                                                                                      | 2017 |
| Suvorexant in the Management Comorbid Sleep Disorder and Alcohol Dependence                                                                                                                                                | NCT03897062                                                                                                                                                                                                                                                                                          | 2019 |
| Multicenter clinical study about the action of Fuzheng Huayu Capsule against liver fibrosis with chronic hepatitis B                                                                                                       | Liu, , P, Hu, YY, Liu, C, Xu, LM, Liu, CH, Sun, KW, Hu, DC, Yin, YK, Zhou, XQ, Wan, MB, Cai, X, Zhang, ZQ, Ye, J, Tang, BZ; He, J                                                                                                                                                                    | 2003 |
| Changes in the immune response after treatment with benznidazole versus no treatment in patients with chronic indeterminate Chagas disease                                                                                 | Vallejo, , A, Monge-Maillo, B, Gutiérrez, C, Norman, FF, López-Vélez, R; Pérez-Molina, JA                                                                                                                                                                                                            | 2016 |
| Adding HRV biofeedback to psychotherapy increases heart rate variability and improves the treatment of major depressive disorder                                                                                           | Caldwell, , YT; Steffen, PR                                                                                                                                                                                                                                                                          | 2018 |
| Intrathecal Rituximab in Progressive Multiple Sclerosis                                                                                                                                                                    | NCT02545959                                                                                                                                                                                                                                                                                          | 2015 |
| Phosphatidylethanol (PEth) in blood as marker of alcohol relapse (AR) in Subjects with Severe Alcoholic Hepatitis (sAH) in the ELAD Phase 3 Clinical Trial                                                                 | Mac Nicholas, , R, Subramanian, RM, Thompson, JA, Al-khafaji, A, Reich, DJ, Hassanein, TI, Teperman, LW, Li, Z; Ashley, R                                                                                                                                                                            | 2016 |
| Angiotensin-converting enzyme inhibition improves vascular function in rheumatoid arthritis                                                                                                                                | Flammer, , AJ, Sudano, I, Hermann, F, Gay, S, Forster, A, Neidhart, M, Künzler, P, Enseleit, F, Périat, D, Hermann, M, Nussberger, J, Luscher, TF, Corti, R, Noll, G; Ruschitzka, F                                                                                                                  | 2008 |
| Serum interferon-gamma is a psoriasis severity and prognostic marker                                                                                                                                                       | Abdallah, , MA, Abdel-Hamid, MF, Kotb, AM; Mabrouk, EA                                                                                                                                                                                                                                               | 2009 |
| Altered monocyte CD44 expression in peripheral arterial disease is corrected by fish oil supplementation                                                                                                                   | Madden, , J, Shearman, CP, Dunn, RL, Dastur, ND, Tan, RM, Nash, GB, Rainger, GE, Brunner, A, Calder, PC; Grimble, RF                                                                                                                                                                                 | 2009 |
| IgG Fc N-glycosylation in Guillain-Barré syndrome treated with immunoglobulins                                                                                                                                             | Fokkink, , WJ, Selman, MH, Dortland, JR, Durmus, B, Kuitwaard, K, Huizinga, R, van Rijs, W, Tio-Gillen, AP, van Doorn, PA, Deelder, AM, Wuhler, M; Jacobs, BC                                                                                                                                        | 2014 |
| Impact of Specialist Led Integrated Care in COPD                                                                                                                                                                           | NCT03482700                                                                                                                                                                                                                                                                                          | 2018 |
| Antipruritic Effect of Acupuncture in Patients With Atopic Dermatitis                                                                                                                                                      | NCT02844452                                                                                                                                                                                                                                                                                          | 2016 |
| Acute rhinosinusitis (ARS). Diagnosis and treatment of adults in general practice                                                                                                                                          | Hansen, JG                                                                                                                                                                                                                                                                                           | 2014 |
| Serum selenium levels in patients with head and neck cancer                                                                                                                                                                | Yadav, , SP, Gera, A, Singh, I; Chanda, R                                                                                                                                                                                                                                                            | 2002 |
| Study of the Effects of Dopaminergic Medications on Dopamine Transporter Imaging in Parkinson's Disease                                                                                                                    | NCT00096720                                                                                                                                                                                                                                                                                          | 2004 |

|                                                                                                                                                                                                                                                                                          |                                                                                                                                                                                                                                                                                                  |      |
|------------------------------------------------------------------------------------------------------------------------------------------------------------------------------------------------------------------------------------------------------------------------------------------|--------------------------------------------------------------------------------------------------------------------------------------------------------------------------------------------------------------------------------------------------------------------------------------------------|------|
| Rationale and design of a multicenter placebo-controlled double-blind randomized trial to evaluate the effect of empagliflozin on endothelial function: the EMBLEM trial                                                                                                                 | Tanaka, , A, Shimabukuro, M, Okada, Y, Taguchi, I, Yamaoka-Tojo, M, Tomiyama, H, Teragawa, H, Sugiyama, S, Yoshida, H, Sato, Y, Kawaguchi, A, Ikehara, Y, Machii, N, Maruhashi, T, Shima, KR, Takamura, T, Matsuzawa, Y, Kimura, K, Sakuma, M, Oyama, JI, Inoue, T, Higashi, Y, Ueda, S; Node, K | 2017 |
| Rilotumumab in combination with epirubicin, cisplatin, and capecitabine as first-line treatment for gastric or oesophagogastric junction adenocarcinoma: an open-label, dose de-escalation phase 1b study and a double-blind, randomised phase 2 study                                   | Iveson, , T, Donehower, RC, Davidenko, I, Tjulandin, S, Deptala, A, Harrison, M, Nirni, S, Lakshmaiah, K, Thomas, A, Jiang, Y, Zhu, M, Tang, R, Anderson, A, Dubey, S, Oliner, KS; Loh, E                                                                                                        | 2014 |
| Cytotoxic markers associate with protection against malaria in human volunteers immunized with Plasmodium falciparum sporozoites                                                                                                                                                         | Bijker, , EM, Teirlinck, AC, Schats, R, van Gemert, GJ, van de Vegte-Bolmer, M, van Lieshout, L, Int'Hout, J, Hermesen, CC, Scholzen, A, Visser, LG; Sauerwein, RW                                                                                                                               | 2014 |
| A comparison of fish oil, flaxseed oil and hempseed oil supplementation on selected parameters of cardiovascular health in healthy volunteers                                                                                                                                            | Kaul, , N, Kreml, R, Austria, JA, Richard, MN, Edel, AL, Dibrov, E, Hirono, S, Zettler, ME; Pierce, GN                                                                                                                                                                                           | 2008 |
| CBS Treatment in Hand Osteoarthritis and Psoriatic Arthritis                                                                                                                                                                                                                             | NCT03693833                                                                                                                                                                                                                                                                                      | 2018 |
| Randomized, double-blind pilot study of transcatheter injection of autologous aldehyde dehydrogenase-bright stem cells in patients with ischemic heart failure                                                                                                                           | Perin, , EC, Silva, GV, Zheng, Y, Gahremanpour, A, Canales, J, Patel, D, Fernandes, MR, Keller, LH, Quan, X, Coulter, SA, Moore, WH, Herlihy, JP; Willerson, JT                                                                                                                                  | 2012 |
| Initial results of an ongoing study for CYP2C19 genetic profile and association with clopidogrel therapy outcome in different ethnic groups from R. Macedonia                                                                                                                            | Nestorovska, , AK, Cvetkovska, A, Dimovski, AJ; Suturkova, L                                                                                                                                                                                                                                     | 2012 |
| The establishment of the objective diagnostic markers and personalized medical intervention in patients with major depressive disorder: rationale and protocol                                                                                                                           | Lv, , X, Si, T, Wang, G, Wang, H, Liu, Q, Hu, C, Wang, J, Su, Y, Huang, Y, Jiang, H; Yu, X                                                                                                                                                                                                       | 2016 |
| Epstein-Barr Virus Suppression in Chronic Obstructive Pulmonary Disease (EViSCO): a Phase 2 Randomised Control Trial                                                                                                                                                                     | NCT03699904                                                                                                                                                                                                                                                                                      | 2018 |
| Platelet-Derived Growth Factor as an Antidepressant Treatment Selection Biomarker: higher Levels Selectively Predict Better Outcomes with Bupropion-SSRI Combination                                                                                                                     | Jha, , MK, Minhajuddin, A, Gadad, BS; Trivedi, MH                                                                                                                                                                                                                                                | 2017 |
| Adjuvant randomized study with Docetaxel and Carboplatin with or without radiotherapy in patients with operable gastric cancer                                                                                                                                                           | ACTRN12609000757213                                                                                                                                                                                                                                                                              | 2009 |
| Study of the possibility to increase remnant insulin production in patients with type 1 diabetes using the glucagon-like peptide 1 mimicking drug liraglutide                                                                                                                            | EUCTR2014-005174-11-SE                                                                                                                                                                                                                                                                           | 2015 |
| Treatment of nerve pain in patients with diabetes with a capsaicin (chilli pepper) patch (skin plaster)                                                                                                                                                                                  | EUCTR2017-004746-17-GB                                                                                                                                                                                                                                                                           | 2018 |
| A MULTI-CENTER, PHASE 2B, RANDOMIZED, DOUBLE-BLIND, PLACEBO-CONTROLLED, PARALLEL-GROUP, DOSE-RANGING STUDY FOLLOWED BY AN EXTENSION PERIOD EVALUATING THE EFFICACY AND SAFETY OF DAPIROLIZUMAB PEGOL IN SUBJECTS WITH MODERATE TO SEVERE ACTIVE SYSTEMIC LUPUS ERYTHEMATOSUS             | PER-044-16                                                                                                                                                                                                                                                                                       | 2017 |
| STudying Acute exacerBations and Responses: COPD STARR Study. v1.0                                                                                                                                                                                                                       | ISRCTN90445176                                                                                                                                                                                                                                                                                   | 2015 |
| Nintedanib (BIBF 1120) in Mesothelioma                                                                                                                                                                                                                                                   | EUCTR2012-005201-48-SE                                                                                                                                                                                                                                                                           | 2015 |
| Study with the herbal preparation STW5-II in patients with mild to moderate ulcerative colitis (chronic inflammatory bowel disease)                                                                                                                                                      | EUCTR2013-000891-13-DE                                                                                                                                                                                                                                                                           | 2014 |
| A clinical trial to test if the drug SMT C1100 is safe and well absorbed compared to placebo when given to children with Duchenne Muscular Dystrophy (DMD), who follow a balanced diet                                                                                                   | EUCTR2014-003100-78-GB                                                                                                                                                                                                                                                                           | 2014 |
| A 52-Week Efficacy and Safety Study of Reslizumab Subcutaneous Dosing in Patients with Uncontrolled Asthma and Elevated Blood Eosinophils                                                                                                                                                | EUCTR2015-000865-29-PL                                                                                                                                                                                                                                                                           | 2015 |
| Treatment of a blood-clotting disorder as a consequence of a major injury with fresh plasma or blood-clotting factor concentrats (RETIC)                                                                                                                                                 | EUCTR2011-004139-29-AT                                                                                                                                                                                                                                                                           | 2011 |
| The effect of a novel drug (CCX140-B) on albuminuria in patients with type 2 diabetes mellitus                                                                                                                                                                                           | EUCTR2011-003049-16-NL                                                                                                                                                                                                                                                                           | 2011 |
| Effect of Probiotic and Smectite Gel on NAFLD                                                                                                                                                                                                                                            | NCT03614039                                                                                                                                                                                                                                                                                      | 2018 |
| Diet as a Potential Treatment for Autosomal Dominant Polycystic Kidney Disease                                                                                                                                                                                                           | NCT02225860                                                                                                                                                                                                                                                                                      | 2014 |
| CORAIL Trial                                                                                                                                                                                                                                                                             | EUCTR2014-005251-39-CZ                                                                                                                                                                                                                                                                           | 2015 |
| Effects of antihypertensive drugs on soluble (pro)renin receptor in hypertensive patients: open-label parallel-group controlled study                                                                                                                                                    | JPRN-UMIN000006342                                                                                                                                                                                                                                                                               | 2011 |
| Treatment of maternal depression during pregnancy-effects for the mother and the child                                                                                                                                                                                                   | EUCTR2013-004444-31-SE                                                                                                                                                                                                                                                                           | 2015 |
| A Double-Blind, Randomized Controlled 12-Week Follow-Up Trial to Evaluate the Efficacy and Safety of Polycan in Combination with Glucosamine for the Treatment of Knee Osteoarthritis                                                                                                    | Truong, , TTT, Lim, JM, Cho, H-R, Kim, YS, Dao, DG, Tran, QH; Choi, J-S                                                                                                                                                                                                                          | 2019 |
| A multicenter randomised study comparing the efficacy of pegylated interferon-alfa-2a plus placebo vs. pegylated interferon-alfa-2a plus tenofovir for the treatment of chronic delta hepatitis- The Hep-Net International Delta hepatitis Interventional Trial II (HIDIT-II) - HIDIT-II | EUCTR2008-005560-13-GR                                                                                                                                                                                                                                                                           | 2009 |
| IL-6 inhibition in patients with depression and low-grade inflammation: the Insight study                                                                                                                                                                                                | ISRCTN16942542                                                                                                                                                                                                                                                                                   | 2018 |

|                                                                                                                                                                                                                                                                                                                                                                                                                                                                                  |                                                                    |      |
|----------------------------------------------------------------------------------------------------------------------------------------------------------------------------------------------------------------------------------------------------------------------------------------------------------------------------------------------------------------------------------------------------------------------------------------------------------------------------------|--------------------------------------------------------------------|------|
| A Phase IV, open-label, prospective, randomised clinical trial to evaluate the usefulness of measuring nitric oxide in exhaled air in the therapeutic management of adult patients with mild asthma                                                                                                                                                                                                                                                                              | EUCTR2012-000372-42-ES                                             | 2012 |
| (M)ultifactorial (I)ntervention in Patients with (P)eripheral (A)rterial (D)isease - A Randomised Controlled Trial                                                                                                                                                                                                                                                                                                                                                               | ACTRN12618000250235                                                | 2018 |
| The effect of liraglutide in patients with prediabetes and kidney failure                                                                                                                                                                                                                                                                                                                                                                                                        | EUCTR2014-001778-32-DK                                             | 2014 |
| Clinical trial to compare the effect of liraglutide and glimepiride, both in combination with metformin in patients with type 2 diabetes                                                                                                                                                                                                                                                                                                                                         | EUCTR2012-000311-87-ES                                             | 2012 |
| RAtegravir Switch Study: effects on Endothelial Recovery                                                                                                                                                                                                                                                                                                                                                                                                                         | EUCTR2011-003298-26-NL                                             | 2011 |
| Research study to evaluate the experimental drug ferumoxitol, to see how well it works for children with chronic kidney disease (CKD) and iron deficiency anemia (IDA) or who are at risk of developing IDA, and to see how safe it is compared to another marketed iron product – iron sucrose                                                                                                                                                                                  | EUCTR2017-004026-15-HU                                             | 2018 |
| A prospective study of therapeutic outcome in patients with locally advanced Head and Neck Cancers treated with chemo-radiation in combination with Nimorazole                                                                                                                                                                                                                                                                                                                   | CTRI/2017/09/009921                                                | 2017 |
| Tyrosine kinase Inhibitors in Dysplasia of Lung epithelium Study 1 - TIDAL 1 Version 1.0                                                                                                                                                                                                                                                                                                                                                                                         | EUCTR2010-023355-29-GB                                             | 2011 |
| Refractory Rheumatoid Arthritis                                                                                                                                                                                                                                                                                                                                                                                                                                                  | DRKS00005807                                                       | 2014 |
| Can-Art Effect and safety of using Cannabis derivatives for the treatment of pain in patients with inflammatory Arthritis, such as rheumatoid arthritis and ankylosing spondylitis, the latter being a type of arthritis that causes a long term inflammation of the joints of the spine. A randomized, double blinded, placebo controlled trial, i.e. in this drug trial, a control group is given a placebo while another group is given the Cannabis derivative being studied | EUCTR2017-004226-15-DK                                             | 2018 |
| Changes in cerebral blood flow velocity after treatment with sumatriptan or placebo and implications for the pathophysiology of migraine                                                                                                                                                                                                                                                                                                                                         | Limmroth, V, May, A, Auerbach, P, Wosnitza, G, Eppe, T; Diener, HC | 1996 |
| An open Phase II study to assess the clinical activity and safety of recMAGE-A3 + AS15 cancer immunotherapeutic in patients with metastatic cutaneous melanoma, and to explore its immunogenic properties, including their relation to tumor infiltration, genomics and proteomics - MAGE3-AS15-MEL-004 (MET)                                                                                                                                                                    | EUCTR2008-001301-42-FR                                             | 2008 |
| Effects of Neupro on cardiovascular observations in patients with restless legs syndrome                                                                                                                                                                                                                                                                                                                                                                                         | EUCTR2011-000053-23-DE                                             | 2011 |
| PRIMUS001: a study looking at two different treatments for pancreatic cancer that has spread to other parts of the body                                                                                                                                                                                                                                                                                                                                                          | ISRCTN75002153                                                     | 2017 |
| Can the drug acipimox relieve muscle symptoms in patients with mitochondrial myopathy?                                                                                                                                                                                                                                                                                                                                                                                           | ISRCTN12895613                                                     | 2019 |
| New treatment regimens for treatment of Post Kala Azar Dermal Leishmaniasis patients in India and Bangladesh region                                                                                                                                                                                                                                                                                                                                                              | CTRI/2017/04/008421                                                | 2017 |
| A study in newborn children in need for intensive treatment resulting from insufficient oxygen supply to the brain                                                                                                                                                                                                                                                                                                                                                               | EUCTR2011-002502-74-Outside-EU/EEA                                 | 2014 |
| Renoprotective effects of ursodeoxycholic acid                                                                                                                                                                                                                                                                                                                                                                                                                                   | ISRCTN14333327                                                     | 2017 |
| Treatment with Iloprost and Integrilin compared to standard care in severe pneumonia patients with severe sepsis                                                                                                                                                                                                                                                                                                                                                                 | EUCTR2011-002254-31-FI                                             | 2011 |
| Treatment of Graves' ophthalmopathy with diclofenak or simvastatin                                                                                                                                                                                                                                                                                                                                                                                                               | EUCTR2015-004334-99-SE                                             | 2015 |
| functional MRI study to evaluate improvement of hand performance after combined motor exercise and aminopiridine assumption                                                                                                                                                                                                                                                                                                                                                      | EUCTR2012-000287-17-IT                                             | 2012 |
| Mycophenolate Treatment for Longstanding Complex Regional Pain Syndrome (MYPS I)                                                                                                                                                                                                                                                                                                                                                                                                 | EUCTR2015-000263-14-GB                                             | 2015 |
| An exploratory study on the related factors of pharmacokinetics and therapeutic markers of clozapine in schizophrenia patients                                                                                                                                                                                                                                                                                                                                                   | ChiCTR1800015631                                                   | 2018 |
| Efficacy of Methotrexate on Chronic Chondrocalcinosis                                                                                                                                                                                                                                                                                                                                                                                                                            | EUCTR2007-003479-37-IE                                             | 2007 |
| balANZ Study: a multicentre, randomised, controlled trial to determine whether peritoneal dialysis treatment with a low GDP, neutral pH peritoneal dialysis (PD) solution (balance) compared to standard PD solution is associated with superior preservation of residual renal function                                                                                                                                                                                         | ACTRN12606000044527                                                | 2006 |
| Comparing the Lutein formulations - Product A and Product B (Lutein 25 mg/capsule) supplementation in healthy, adult humans, after receiving high-fat, high-calorie breakfast                                                                                                                                                                                                                                                                                                    | CTRI/2018/01/011167                                                | 2018 |
| The effect of long term antibiotic therapy on exacerbation (flare-up) frequency in patients with Stable Chronic Obstructive Pulmonary Disease (COPD)                                                                                                                                                                                                                                                                                                                             | EUCTR2012-002199-15-GB                                             | 2013 |
| Assessment of Therapeutic Response to Benznidazole in patients with Chronic Chagas Disease                                                                                                                                                                                                                                                                                                                                                                                       | EUCTR2011-002022-41-ES                                             | 2011 |
| Multicenter, randomized, open-label study to compare immunoglobulin to immunoglobulin plus cyclosporin A combination therapy in patients with severe Kawasaki disease                                                                                                                                                                                                                                                                                                            | JPRN-UMIN000017585                                                 | 2015 |
| The effect of bezafibrate on cholesterol levels after an oral fatload in patients with Familial Dysbetalipoproteinemia                                                                                                                                                                                                                                                                                                                                                           | EUCTR2014-000524-26-NL                                             | 2015 |



|                                                                                                                                                                                                                                                                              |                                                                                                                                                   |      |
|------------------------------------------------------------------------------------------------------------------------------------------------------------------------------------------------------------------------------------------------------------------------------|---------------------------------------------------------------------------------------------------------------------------------------------------|------|
| Gastrointestinal and lung cancer, effects of the fish oil intake on nutritional status, quality of life and immunometabolic outcomes                                                                                                                                         | RBR-2xcd99                                                                                                                                        | 2016 |
| Neoadjuvant plus adjuvant or only adjuvant nab-Paclitaxel plus Gemcitabine for resectable pancreatic cancer - The AIO-NEONAX trial (AIO-PAK-0313) A prospective, randomized, controlled, phase II study of the AIO Pancreatic Cancer Group                                   | EUCTR2013-005559-34-DE                                                                                                                            | 2014 |
| Effects Of Autologous Platelet- Rich Plasma on Pregnancy Rate in Intra Cytoplasmic Sperm Injection (ICSI) cycles in Repeated Implantation Failure Patients                                                                                                                   | IRCT2017061034422N1                                                                                                                               | 2017 |
| A double-blind, randomised, placebo-controlled interventional study to evaluate the effect of orally-dosed Almega PL on cardio-metabolic parameters and inflammatory markers in men and women with hypercholesterolemia                                                      | ACTRN12618000275268                                                                                                                               | 2018 |
| AML-BFM 2012: clinical trial for the treatment of acute myeloid leukemia in children and adolescents                                                                                                                                                                         | ISRCTN78830591                                                                                                                                    | 2013 |
| Iron treatment in patients with known kidney disease                                                                                                                                                                                                                         | EUCTR2010-020452-64-GB                                                                                                                            | 2010 |
| Rituximab in Graves' disease (RIGD)                                                                                                                                                                                                                                          | ISRCTN20381716                                                                                                                                    | 2016 |
| Metabolic Dysfunctions Associated with Pharmacological Treatment of Schizophrenia                                                                                                                                                                                            | EUCTR2018-000178-31-ES                                                                                                                            | 2018 |
| A clinical trial for the effects of testosterone replacement therapy in male patients with hypogonadism on arterial function markers                                                                                                                                         | EUCTR2014-005179-10-GR                                                                                                                            | 2015 |
| Anti-inflammatory effects of roflumilast in chronic obstructive pulmonary disease (ROBERT): a 16-week, randomised, placebo-controlled trial                                                                                                                                  | Rabe, , KF, Watz, H, Baraldo, S, Pedersen, F, Biondini, D, Bagul, N, Hanauer, G, Göhring, UM, Purkayastha, D, Román, J, Alagappan, VKT; Saetta, M | 2018 |
| Prediction and prevention of kidney disease in patients with diabetes                                                                                                                                                                                                        | EUCTR2012-000452-34-NL                                                                                                                            | 2013 |
| Parental communication deviance: its stability and the effect of family treatment in recent-onset schizophrenia                                                                                                                                                              | Nugter, , MA, Dingemans, PM, Linszen, DH, Van der Does, AJ; Gersons, BP                                                                           | 1997 |
| A phase IIa study to characterize the effects of CCL2 inhibition with the Spiegelmer® NOX-E36 in patients with type 2 diabetes mellitus and albuminuria                                                                                                                      | EUCTR2011-005710-11-PL                                                                                                                            | 2012 |
| Control of periodontal inflammation, systemic inflammatory responses and cognitive decline in Alzheimer's disease                                                                                                                                                            | ISRCTN34471493                                                                                                                                    | 2013 |
| A European trial to evaluate the effect of Allopurinol administered very early after birth on brain injury in children with oxygen deficiency during birth                                                                                                                   | EUCTR2016-000222-19-BE                                                                                                                            | 2018 |
| Use of Omalizumab will increase the pregnancy rate, proof of concept study, where women with asthma and infertility will be treated three times with weight and IgE balanced dosis at the first day of their period bleeding                                                 | EUCTR2018-001137-41-DK                                                                                                                            | 2018 |
| Escherichia coli strain Nissle 1917 - Suspension for treatment of patients with Clostridium difficile associated diarrhoea                                                                                                                                                   | EUCTR2017-004531-36-DE                                                                                                                            | 2018 |
| Impact of EECF-treatment (Enhanced External Counterpulsation) on myocardial adaptive arteriogenesis in patients suffering from stable symptomatic coronary heart disease                                                                                                     | ISRCTN08877757                                                                                                                                    | 2007 |
| A study to assess the effect of rilapladib (SB 659032) on Alzheimer's disease                                                                                                                                                                                                | EUCTR2010-020993-41-SE                                                                                                                            | 2011 |
| A Randomised Controlled Trial to assess a food supplement (baker's yeast extract) to support immune function and prevent cold and flu symptoms in a 50 to 70 year old population                                                                                             | EUCTR2011-004910-41-GB                                                                                                                            | 2011 |
| The trial investigates the effect of 500 µg roflumilast tablets once daily on acute worsening of symptoms (exacerbations) treated with standard therapy in patients with chronic obstructive pulmonary disease (COPD)                                                        | EUCTR2011-002905-31-GB                                                                                                                            | 2011 |
| A European trial to evaluate the effect of Allopurinol administered very early after birth on brain injury in children with oxygen deficiency during birth                                                                                                                   | EUCTR2016-000222-19-DE                                                                                                                            | 2017 |
| Efficacy and safety of low-dose IL-2 (ld-IL-2) as a Treg enhancer for controlling neuro-inflammation in newly diagnosed Amyotrophic Lateral Sclerosis (ALS) patients                                                                                                         | EUCTR2015-005347-14-GB                                                                                                                            | 2016 |
| 2-Iminobiotin as a treatment for neonates born with severe oxygen shortage at birth                                                                                                                                                                                          | EUCTR2015-003063-12-Outside-EU/EEA                                                                                                                | 2016 |
| Automimmune Diabetes Accelerator Prevention Trial (adAPT)                                                                                                                                                                                                                    | EUCTR2015-000748-41-GB                                                                                                                            | 2015 |
| Double-blind, masked, randomized, three period crossover study to evaluate the changes in exhaled nitric oxide (eNO) following treatment with fluticasone propionate aerosol delivered by a metered dose inhaler in patients with chronic mild to moderate persistent asthma | EUCTR2012-003395-40-DE                                                                                                                            | 2012 |
| A study to evaluate the effectiveness and safety of Apremilast in subjects with active psoriatic arthritis                                                                                                                                                                   | EUCTR2013-001590-25-EE                                                                                                                            | 2013 |
| Targeted retreatment with antibiotics following exacerbations of Chronic Obstructive Pulmonary Disease                                                                                                                                                                       | EUCTR2012-002198-72-GB                                                                                                                            | 2013 |
| Can we reduce asthma attacks in children using exhaled nitric oxide measurements?                                                                                                                                                                                            | ISRCTN67875351                                                                                                                                    | 2017 |
| FOCUS4: molecular selection of therapy in colorectal cancer                                                                                                                                                                                                                  | EUCTR2012-005111-12-GB                                                                                                                            | 2013 |
| The effects of adjuvant Tualang honey therapy on disease activity markers in systemic lupus erythematosus patients                                                                                                                                                           | ACTRN12611000074998                                                                                                                               | 2011 |

|                                                                                                                                                                                                                                                |                                                                                                                                                                                                                                                                                                                                                     |      |
|------------------------------------------------------------------------------------------------------------------------------------------------------------------------------------------------------------------------------------------------|-----------------------------------------------------------------------------------------------------------------------------------------------------------------------------------------------------------------------------------------------------------------------------------------------------------------------------------------------------|------|
| Efficacy of Roflumilast and Montelukast in the treatment of severe uncontrolled asthma                                                                                                                                                         | EUCTR2012-002064-27-HU                                                                                                                                                                                                                                                                                                                              | 2012 |
| A Dehydroepiandrosterone and Pharmacokinetics in Trauma study (ADaPT)                                                                                                                                                                          | ISRCTN12961998                                                                                                                                                                                                                                                                                                                                      | 2018 |
| A 2 part clinical study that will evaluate the safety and effectiveness of LJN452A to treat patients with fatty liver disease for a period of 12 weeks. The first part will be used for LJN452 dose selection for the second part of the study | EUCTR2015-005215-33-SK                                                                                                                                                                                                                                                                                                                              | 2016 |
| A study to investigate the safety and efficacy of a six month oral treatment with a twice daily dose of BAY 1142524 in comparison to placebo in patients with reduced left-ventricular ejection fraction after acute myocardial infarction     | EUCTR2016-002167-33-ES                                                                                                                                                                                                                                                                                                                              | 2016 |
| Individualizing duration of antibiotic therapy in hospitalized patients with pneumonia                                                                                                                                                         | EUCTR2011-003176-36-IT                                                                                                                                                                                                                                                                                                                              | 2011 |
| A Prospective, Randomized, Double-Blind, Double-Dummy, Multicenter Study to Assess the Safety and Efficacy of Doripenem Compared With Imipenem-Cilastatin in the Treatment of Subjects with Ventilator-Associated Pneumonia                    | EUCTR2007-004646-33-DE                                                                                                                                                                                                                                                                                                                              | 2008 |
| Efficacy of metformin in gestational diabetes                                                                                                                                                                                                  | EUCTR2015-000361-31-ES                                                                                                                                                                                                                                                                                                                              | 2015 |
| Proteinuria in Glomerulonephritis: myfortic® (GloMY)                                                                                                                                                                                           | ISRCTN11937028                                                                                                                                                                                                                                                                                                                                      | 2010 |
| Treatment of chronic non bacterial osteomyelitis with pamidronate                                                                                                                                                                              | EUCTR2015-002038-36-DK                                                                                                                                                                                                                                                                                                                              | 2015 |
| Can treatment with drugs developed to treat thin and weakened osteoporotic bones make knee implants stay fixed in the bones and last longer?                                                                                                   | EUCTR2012-004046-15-DK                                                                                                                                                                                                                                                                                                                              | 2013 |
| The Impact of Gender and Protein Intake on the Success of Weight Maintenance and Associated Cardiovascular Risk Benefits, Independent of the Mode of Food Provision: the DiOGenes Randomized Trial                                             | Navas-Carretero, S, Holst, C, Saris, WH, van Baak, MA, Jebb, SA, Kafatos, A, Papadaki, A, Pfeiffer, AF, Handjieva-Darlenska, T, Hlavaty, P, Stender, S, Larsen, TM, Astrup, A; Martinez, JA                                                                                                                                                         | 2016 |
| Plasma 3-nitrotyrosine and outcome in neonates with severe bronchopulmonary dysplasia after inhaled nitric oxide                                                                                                                               | Lorch, SA, Banks, BA, Christie, J, Merrill, JD, Althaus, J, Schmidt, K, Ballard, PL, Ischiropoulos, H; Ballard, RA                                                                                                                                                                                                                                  | 2003 |
| Effects of a pulmonary rehabilitation program on physical capacity, peripheral muscle function and inflammatory markers in asthmatic children and adolescents: study protocol for a randomized controlled trial                                | Reimberg, MM, Castro, RA, Selman, JP, Meneses, AS, Politti, F, Mallozi, MC, Wandalsen, GF, Solé, D, De Angelis, K, Dal Corso, S; Lanza, FC                                                                                                                                                                                                          | 2015 |
| Dopamine agonist monotherapy in Parkinson's disease                                                                                                                                                                                            | Clarke, CE; Guttman, M                                                                                                                                                                                                                                                                                                                              | 2002 |
| Evaluating osteopathic manipulative therapy (OMT) as a treatment modality for the reduction of chronic stress in medical students                                                                                                              | Tyner, TJ, Cavayero II, C, Philips II, A, Johnson III, B; Quinn, T                                                                                                                                                                                                                                                                                  | 2015 |
| Minimal residual disease analysis in patients with follicular lymphoma treated with obinutuzumab plus bendamustine versus bendamustine alone in GADOLIN, a phase II study of relapsed/refractory indolent non-Hodgkin lymphoma                 | Pott, C, Belada, D, Danesi, N, Fingerle-Rowson, G, Gribben, J, Harbron, C, Hoster, E, Kahl, B, Mundt, K, Sebban, C, Sehn, LH; Cheson, BD                                                                                                                                                                                                            | 2016 |
| Longitudinal neurocognitive effects of combined electroconvulsive therapy and pharmacotherapy in geriatric major depressive disorder                                                                                                           | Lisanby, S, McClintock, S, Alexopoulos, G, Bailine, S, Bernhardt, E, Briggs, M, Cullum, CM, Deng, Z-D, Geduldig, E, Greenberg, R, Husain, M, Kaliora, S, Knapp, R, Liebman, L, Latoussakis, V, McCall, WV, Mueller, M, Petrides, G, Prudic, J, Rosenquist, P, Rudorfer, M, Sampson, S, Teklehaimanot, A, Tobias, K, Weiner, R, Young, R; Kellner, C | 2017 |
| Pembrolizumab for patients with advanced prostate adenocarcinoma: preliminary results from the KEYNOTE-028 study                                                                                                                               | Hansen, A, Massard, C, Ott, PA, Haas, N, Lopez, J, Ejadi, S, Wallmark, J, Keam, B, Delord, J-P, Aggarwal, R, Gould, M, Qiu, P, Saraf, S, Keefe, S; Piha-Paul, SA                                                                                                                                                                                    | 2016 |
| Changes in echocardiographic parameters in iron deficiency patients with heart failure and chronic kidney disease treated with intravenous iron                                                                                                | Toblli, JE, Di Gennaro, F; Rivas, C                                                                                                                                                                                                                                                                                                                 | 2015 |
| The effect of N-acetylcysteine on proteinuria and markers of tubular injury in non-diabetic patients with chronic kidney disease. A placebo-controlled, randomized, open, cross-over study                                                     | Renke, M, Tylicki, L, Rutkowski, P, Larczyński, W, Aleksandrowicz, E, Lysiak-Szydłowska, W; Rutkowski, B                                                                                                                                                                                                                                            | 2008 |
| The protective effects of angiotensin II blockade with olmesartan medoxomil on resistance vessel remodeling (The VIOS study): rationale and baseline characteristics                                                                           | Smith, RD, Yokoyama, H, Averill, DB, Cooke, L, Brosnihan, KB, Schiffrin, EL; Ferrario, CM                                                                                                                                                                                                                                                           | 2006 |
| Dual blockade of the renin-angiotensin-aldosterone system with high-dose angiotensin-converting enzyme inhibitor for nephroprotection: an open, controlled, randomized study                                                                   | Tylicki, L, Renke, M, Rutkowski, P, Larczyński, W, Aleksandrowicz, E, Lysiak-Szydłowska, W; Rutkowski, B                                                                                                                                                                                                                                            | 2008 |
| Randomized placebo-controlled trial assessing the effect of 24-week fenofibrate therapy on circulating markers of abdominal aortic aneurysm: outcomes from the FAME-2 trial                                                                    | Pinchbeck, JL, Moxon, JV, Rowbotham, SE, Bourke, M, Lazzaroni, S, Morton, SK, Matthews, EO, Hendy, K, Jones, RE, Bourke, B, Jaeggi, R, Favot, D, Quigley, F, Jenkins, JS, Reid, CM, Velu, R; Golledge, J                                                                                                                                            | 2018 |
| Combined continuous ethinyl estradiol/norethindrone acetate does not improve forearm blood flow in postmenopausal women at risk for cardiovascular events: a pilot study                                                                       | Duvernoy, CS, Rose, PA, Kim, HM, Kehrer, C; Brook, RD                                                                                                                                                                                                                                                                                               | 2007 |
| A post-hoc analysis of a novel endpoint for asthma exacerbations in a SQ HDM SLIT-tablet phase III allergic asthma trial                                                                                                                       | Eriksson, G, Nolte, H, Ljorring, C, Riis, B; Virchow, JC                                                                                                                                                                                                                                                                                            | 2018 |
| Atorvastatin and simvastatin in patients on hemodialysis: effects on lipoproteins, C-reactive protein and in vivo oxidized LDL                                                                                                                 | van den Akker, JM, Bredie, SJ, Diepenveen, SH, van Tits, LJ, Stalenhoef, AF; van Leusen, R                                                                                                                                                                                                                                                          | 2003 |
| Addition of fexofenadine to inhaled corticosteroid therapy to reduce inflammatory biomarkers in atopic asthma                                                                                                                                  | Fardon, TC, Lee, DK, Hodge, MR; Lipworth, BJ                                                                                                                                                                                                                                                                                                        | 2005 |
| Predictors of delayed culture conversion among Ugandan patients                                                                                                                                                                                | Atwine, D, Orikiriza, P, Taremwa, I, Ayebare, A, Logoose, S, Mwanga-Amumpaire, J, Jindani, A; Bonnet, M                                                                                                                                                                                                                                             | 2017 |

|                                                                                                                                                                                                                                                            |                                                                                                                                                                                                                         |      |
|------------------------------------------------------------------------------------------------------------------------------------------------------------------------------------------------------------------------------------------------------------|-------------------------------------------------------------------------------------------------------------------------------------------------------------------------------------------------------------------------|------|
| Changes in inflammatory mediators in gingival crevicular fluid following periodontal disease treatment in pregnant women                                                                                                                                   | Penova-Veselinovic, , B, Keelan, J, Newnham, JP; Pennell, CE                                                                                                                                                            | 2014 |
| Description and status of the azithromycin and coronary events study (ACES)                                                                                                                                                                                | Jackson, LA                                                                                                                                                                                                             | 2000 |
| Oral Health Intervention Program for Children With Congenital Heart Defects                                                                                                                                                                                | NCT03311438                                                                                                                                                                                                             | 2017 |
| Psychological interventions to improve adherence to oral hygiene instructions in adults with periodontal diseases                                                                                                                                          | Renz, , A, Ide, M, Newton, T, Robinson, PG; Smith, D                                                                                                                                                                    | 2007 |
| Evaluating the validity of probing attachment loss as a surrogate for tooth mortality in a clinical trial on the elderly                                                                                                                                   | Hujoel, , PP, Leroux, BG, DeRouen, TA, Powell, LV; Kiyak, HA                                                                                                                                                            | 1997 |
| Effects of Pycnogenol on endothelial function in patients with stable coronary artery disease: a double-blind, randomized, placebo-controlled, cross-over study                                                                                            | Enseleit, , F, Sudano, I, Périat, D, Winnik, S, Wolfrum, M, Flammer, AJ, Fröhlich, GM, Kaiser, P, Hirt, A, Haile, SR, Krasniqi, N, Matter, CM, Uhlenhut, K, Högger, P, Neidhart, M, Lüscher, TF, Ruschitzka, F; Noll, G | 2012 |
| Chronic Beta-blockade and Cardiopulmonary Exercise in COPD                                                                                                                                                                                                 | NCT02380053                                                                                                                                                                                                             | 2015 |
| Inhaled heparin in cystic fibrosis                                                                                                                                                                                                                         | Serisier, , DJ, Shute, JK, Hockey, PM, Higgins, B, Conway, J; Carroll, MP                                                                                                                                               | 2006 |
| Levetiracetam vs. Older antiepileptic drugs: a randomized prospective bone health study                                                                                                                                                                    | Hakami, , T, O'Brien, T, Petty, S, Sakellarides, M, Christie, J, Todaro, M; Wark, JD                                                                                                                                    | 2011 |
| Short-term rosuvastatin treatment for the prevention of contrast-induced acute kidney injury in patients receiving moderate or high volumes of contrast media: a sub-analysis of the TRACK-D study                                                         | Zhang, , J, Li, Y, Tao, GZ, Chen, YD, Hu, TH, Cao, XB, Jing, QM, Wang, XZ, Ma, YY, Wang, G, Liu, HW, Wang, B, Xu, K, Li, J, Deng, J; Han, YL                                                                            | 2015 |
| Changes of biochemical indexes in patients with acute cerebral infarction after treatment with simvastatin                                                                                                                                                 | Yang, C                                                                                                                                                                                                                 | 2006 |
| A 7-week, randomized, double-blind trial of olanzapine/fluoxetine combination versus lamotrigine in the treatment of bipolar I depression                                                                                                                  | Brown, , EB, McElroy, SL, Keck, PE, Deldar, A, Adams, DH, Tohen, M; Williamson, DJ                                                                                                                                      | 2006 |
| Efficacy and safety of avandamet or uptitrated metformin treatment in patients with type 2 diabetes inadequately controlled with metformin alone: a multicenter, randomized, controlled trial                                                              | Cai, , XL, Chen, YL, Zhao, JJ, Shan, ZY, Qiu, MC, Li, CJ, Gu, W, Tian, HM, Yang, HZ, Xue, YM, Yang, JK, Hong, TP; Ji, LN                                                                                                | 2015 |
| Efficacy and safety of Canakinumab in patients with periodic fever syndromes (colchicine-resistant fmf, hids/mkd and traps): results from a phase 3, pivotal, umbrella trial                                                                               | De Benedetti, , F, Anton, J, Gattorno, M, Lachmann, H, Kone-Paut, I, Ozen, S, Frenkel, J, Simon, A, Zeff, A, Ben-Chetrit, E, Hoffman, HM, Joubert, Y, Lheritier, K, Speziale, A; Guido, J                               | 2017 |
| Using a randomized controlled trial to test whether modifications to contingency management improve outcomes for heavy drinkers with serious mental illness                                                                                                | Oluwoye, , O, Skalsky, J, Burduli, E, Chaytor, NS, McPherson, S, Murphy, SM, Herron, J, Hirschak, K, Burley, M, Ries, RK, Roll, JM; McDonnell, MG                                                                       | 2018 |
| Treatment of generalized pustular psoriasis during pregnancy: a real challenge                                                                                                                                                                             | Zaouak, , A, Sassi, W, Hammami, H; Fenniche, S                                                                                                                                                                          | 2016 |
| Comparison of changes in early inflammatory markers between sirolimus- and paclitaxel-eluting stent implantation                                                                                                                                           | Li, , JJ, Yan, HB, Xiang, XP, Qin, XW; Zhang, CY                                                                                                                                                                        | 2009 |
| Supplementation with a blend of krill and salmon oil is associated with increased metabolic risk in overweight men                                                                                                                                         | Albert, , BB, Derraik, JG, Brennan, CM, Biggs, JB, Garg, ML, Cameron-Smith, D, Hofman, PL; Cutfield, WS                                                                                                                 | 2015 |
| A comparison of the effect of glitazones on serum sialic acid in patients with type 2 diabetes                                                                                                                                                             | ur Rahman, , I, Idrees, M, Salman, M, Khan, RU, Khan, MI, Amin, F; Jan, NU                                                                                                                                              | 2012 |
| Safety and efficacy of ferric citrate in patients with nondialysis-dependent chronic kidney disease and iron deficiency anemia: post hoc analysis in patients with or without heart failure                                                                | McCullough, , PA, Uhlig, K, Neylan, JF; Fishbane, S                                                                                                                                                                     | 2017 |
| Clinical effects of "pioglitazone", an insulin sensitizing drug, on psoriasis vulgaris and its co-morbidities, a double blinded randomized controlled trialx1                                                                                              | Hafez, , VG, Bosseila, M, Abdel Halim, MRE, Shaker, OG, Kamal, M; Kareem, HS                                                                                                                                            | 2015 |
| A retrospective review identifying resistant microbial strains, antimicrobial sensitivities and risk stratification of first line antibiotic use in adult cancer patients with neutropenic sepsis                                                          | Danga, , A, Hui, YMT, Lazarus, K; Sugai, T                                                                                                                                                                              | 2017 |
| A Randomized-Controlled Trial of Inhaled Hypertonic Saline (7%) to Evaluate the Lung Clearance Index                                                                                                                                                       | NCT02276898                                                                                                                                                                                                             | 2014 |
| Effects of azithromycin on intracellular cytokine responses and mucocutaneous manifestations in Behçet's disease                                                                                                                                           | Mumcu, , G, Inanç, N, Özdemir, FT, Tulunay, A, Ekşioğlu-Demiralp, E, Ergun, T; Direskeneli, H                                                                                                                           | 2013 |
| Efficacy of combined orthodontic-periodontic treatment for patients with periodontitis and its effect on inflammatory cytokines: a comparative study                                                                                                       | Zhang, , J, Zhang, AM, Zhang, ZM, Jia, JL, Sui, XX, Yu, LR; Liu, HT                                                                                                                                                     | 2017 |
| Primary prevention: phytoprevention and chemoprevention of colorectal cancer                                                                                                                                                                               | Turini, , ME; DuBois, RN                                                                                                                                                                                                | 2002 |
| Increased CSF APPs-α levels in patients with Alzheimer disease treated with acitretin                                                                                                                                                                      | Endres, , K, Fahrenholz, F, Lotz, J, Hiemke, C, Teipel, S, Lieb, K, Tüscher, O; Fellgiebel, A                                                                                                                           | 2014 |
| The endogenous system is not implicated in the pathogenesis of functional constipation; results of a randomised, double blind, study investigating naloxone hydrochloride sustained release capsules (NalcolTM) as a treatment for functional constipation | Bignell, , M, Hart, A; Rhodes, M                                                                                                                                                                                        | 2014 |
| Early effects of metformin in women with polycystic ovary syndrome: a prospective randomized, double-blind, placebo-controlled trial                                                                                                                       | Eisenhardt, , S, Schwarzmann, N, Henschel, V, Germeyer, A, von Wolff, M, Hamann, A; Strowitzki, T                                                                                                                       | 2006 |
| The effect of raloxifene after discontinuation of long-term alendronate treatment of postmenopausal osteoporosis                                                                                                                                           | Michalská, , D, Stepan, JJ, Basson, BR; Pavo, I                                                                                                                                                                         | 2006 |
| The effect of a low molecular mass thrombin inhibitor, inogatran, and heparin on thrombin generation and fibrin turnover in patients with unstable coronary artery disease                                                                                 | Linder, , R, Oldgren, J, Egberg, N, Grip, L, Larson, G, Siegbahn, A; Wallentin, L                                                                                                                                       | 1999 |
| A diabetes outcome progression trial (ADOPT): an international multicenter study of the comparative efficacy of rosiglitazone, glyburide, and metformin in recently diagnosed type 2 diabetes                                                              | Viberti, , G, Kahn, SE, Greene, DA, Herman, WH, Zinman, B, Holman, RR, Haffner, SM, Levy, D, Lachin, JM, Berry, RA, Heise, MA, Jones, NP; Freed, MI                                                                     | 2002 |

|                                                                                                                                                                                                     |                                                                                                                                                                                         |      |
|-----------------------------------------------------------------------------------------------------------------------------------------------------------------------------------------------------|-----------------------------------------------------------------------------------------------------------------------------------------------------------------------------------------|------|
| Clopidogrel does not suppress blood markers of coagulation activation in aspirin-treated patients with non-ST-elevation acute coronary syndromes                                                    | Eikelboom, , JW, Weitz, JI, Budaj, A, Zhao, F, Copland, I, Maciejewski, P, Johnston, M; Yusuf, S                                                                                        | 2002 |
| Vitamin D and immunomodulation in early rheumatoid arthritis: a randomized double-blind placebo-controlled study                                                                                    | Buondonno, , I, Rovera, G, Sassi, F, Rigoni, MM, Lomater, C, Parisi, S, Pellerito, R, Isaia, GC; D'Amelio, P                                                                            | 2017 |
| Mode of death in heart failure: findings from the ATLAS trial                                                                                                                                       | Poole-Wilson, , PA, Uretsky, BF, Thygesen, K, Cleland, JG, Massie, BM; Rydén, L                                                                                                         | 2003 |
| Supplementation with dairy calcium and/or flaxseed fibers in conjunction with orlistat augments fecal fat excretion without altering ratings of gastrointestinal comfort                            | Kristensen, , M, Juul, SR, Sorensen, KV, Lorenzen, JK; Astrup, A                                                                                                                        | 2017 |
| A Phase II study to assess safety and efficacy of olesoxime (TRO19622) in 3-25 year old Spinal Muscular Atrophy (SMA) patients                                                                      | Dessaud, , E, Andre, C, Scherrer, B, Berna, P, Pruss, R, Cuvier, V, Hauke, W; Bertini, E                                                                                                | 2014 |
| Effects of metformin or rosiglitazone on serum concentrations of homocysteine, folate, and vitamin B12 in patients with type 2 diabetes mellitus                                                    | Sahin, , M, Tutuncu, NB, Ertugrul, D, Tanaci, N; Guvener, ND                                                                                                                            | 2007 |
| The effects of bright light therapy on depression, sleep and circadian rhythm in patients with Parkinson's disease and a depressive disorder: results of a double-blind randomized controlled trial | Rutten, , S, Vriend, C, Smit, J, Berendse, H, Van Someren, E, Hoogendoorn, A, Twisk, J, Werf, YVD; Heuvel, OVD                                                                          | 2018 |
| A randomised controlled trial of short term growth and collagen turnover in asthmatics treated with inhaled formoterol and budesonide                                                               | Heuck, , C, Heickendorff, L; Wolthers, OD                                                                                                                                               | 2000 |
| Short-course antibiotic treatment for community-acquired alveolar pneumonia in ambulatory children: a double-blind, randomized, placebo-controlled trial                                            | Greenberg, , D, Givon-Lavi, N, Sadaka, Y, Ben-Shimol, S, Bar-Ziv, J; Dagan, R                                                                                                           | 2014 |
| Electrocortical changes associated with minocycline treatment in fragile X syndrome                                                                                                                 | Schneider, , A, Leigh, MJ, Adams, P, Nanakul, R, Chechi, T, Olichney, J, Hagerman, R; Hessler, D                                                                                        | 2013 |
| Exploratory biomarkers that predict for clinical outcomes in a Phase II trial with ipilimumab plus finite androgen deprivation therapy for metastatic non-castrate prostate cancer                  | Subudhi, , SK, Aparicio, A, Gao, J, Zurita-Saavedra, A, Araujo, JC, Logothetis, CJ, Brinda, KR, Allison, JP, Vence, L, Emerson, RO, Yusko, E, Vignali, M, Robins, HS, Sun, J; Sharma, P | 2016 |
| Predictive value of bevacizumab-related hypertension and proteinuria in patients with mCRC in the real practice                                                                                     | Moretti, , A, Nisi, C, Carandina, I, Marzola, M, Banno, E, Da Ros, L; Frassoldati, A                                                                                                    | 2015 |
| Effect of low-dose dual blockade of renin-angiotensin system on urinary TGF-beta in type 2 diabetic patients with advanced kidney disease                                                           | Song, , JH, Cha, SH, Lee, HJ, Lee, SW, Park, GH, Lee, SW; Kim, MJ                                                                                                                       | 2006 |
| Arterial stiffening and systemic endothelial activation induced by smoking: the role of COX-1 and COX-2                                                                                             | Vlachopoulos, , C, Aznaouridis, K, Bratsas, A, Ioakeimidis, N, Dima, I, Xaplanteris, P, Stefanadis, C; Tousoulis, D                                                                     | 2015 |
| Long-term effect of interferon alpha alone or after prednisone withdrawal in chronic hepatitis B. Interim report and review of the literature                                                       | Gonzalez-Mateos, , F, Garcia-Monzon, C, Garcia-Buey, L, Garcia-Sanchez, A, Pajares, JM; Moreno-Otero, R                                                                                 | 1995 |
| Randomized study of nutritional status and treatment toxicities of oral arginine, glutamine, and omega-3 fatty acids during concurrent chemoradiotherapy for head and neck cancer patients          | Chitapanarux, , I, Pisprasert, V, Tharavichitkul, E, Jakrabhandu, S, Klunklin, P, Onchan, W, Supawongwattana, B, Traisathit, P, Rattanachaiwong, S; Sattasiri, WM                       | 2016 |
| Alternative multiple breath washout outcomes for clinical trials in cystic fibrosis                                                                                                                 | Ratjen, , F, Salazar, J, Jensen, R, Amin, R, Gustafsson, P, Stanojevic, S; Subbarao, P                                                                                                  | 2012 |
| AST-120 (spherical carbon adsorbent) in the treatment of perianal fistulae in mild-to-moderate Crohn's disease: fHAST-1, a phase 3, multicenter, placebo-controlled study                           | Reinisch, , W, Travis, S, Hanauer, S, Wang, H, Shara, N; Harris, MS                                                                                                                     | 2014 |
| A randomized study of the safety, absorption and efficacy of pimecrolimus cream 1% applied twice or four times daily in patients with atopic dermatitis                                             | Ling, , M, Gottlieb, A, Pariser, D, Caro, I, Stewart, D, Scott, G; Abrams, K                                                                                                            | 2005 |
| Intravenous colistin sulphomethate in acute respiratory exacerbations in adult patients with cystic fibrosis                                                                                        | Conway, , SP, Pond, MN, Watson, A, Etherington, C, Robey, HL; Goldman, MH                                                                                                               | 1997 |
| Soluble CD206 plasma levels in rheumatoid arthritis reflect decrease in disease activity                                                                                                            | Heftdal, , LD, Stengaard-Pedersen, K, Ørnbjerg, LM, Hetland, ML, Hørslev-Petersen, K, Junker, P, Østergaard, M, Hvid, M, Deleuran, B, Møller, HJ; Greisen, SR                           | 2017 |
| Randomised phase II study of axitinib or bevacizumab combined with paclitaxel/carboplatin as first-line therapy for patients with advanced non-small-cell lung cancer                               | Twelves, , C, Chmielowska, E, Havel, L, Popat, S, Swieboda-Sadlej, A, Sawrycki, P, Bycott, P, Ingrosso, A, Kim, S, Williams, JA, Chen, C, Olszanski, AJ, de Besi, P; Schiller, JH       | 2014 |
| Effects of angiotensin II receptor blockade in systemic sclerosis: randomized controlled trial                                                                                                      | Abou-Raya, , A, Abou-Raya, S; Helmi, M                                                                                                                                                  | 2013 |
| High-dose vitamin D3 supplementation in children and young adults with HIV: a randomized, placebo-controlled trial                                                                                  | Stallings, , VA, Schall, JI, Hediger, ML, Zemel, BS, Tuluc, F, Dougherty, KA, Samuel, JL; Rutstein, RM                                                                                  | 2015 |
| Personalizing twin delivery management: a secondary analysis of a randomized clinical trial comparing planned caesarean or planned vaginal delivery                                                 | Zafarmand, , MH, Goossens, SM, Tajik, P, Bossuyt, PM, Asztalos, EV, Gardener, G, Willan, AR, Roumen, FJ, Mol, BW; Barrett, JY                                                           | 2018 |
| Simultaneous study of docetaxel based anthracycline free adjuvant treatment evaluation, as well as lifestyle intervention strategies: the SUCCESS-C-trial                                           | Salmen, , J, Ortmann, U, Hagenbeck, C, Hauner, D, Hauner, H, Neugebauer, J, Andergassen, U, Rack, B, Schneeweiss, A, Beckmann, MW; Janni, W                                             | 2012 |
| A randomized trial of stress management for the prevention of new brain lesions in MS                                                                                                               | Mohr, , DC, Lovera, J, Brown, T, Cohen, B, Neylan, T, Henry, R, Siddique, J, Jin, L, Daikh, D; Pelletier, D                                                                             | 2012 |
| Why capillaroscopy can predict disease severity and prognosis                                                                                                                                       | Cutolo, M                                                                                                                                                                               | 2017 |
| Studying Tailored Exercise Prescriptions in Breast Cancer Patients                                                                                                                                  | NCT02802826                                                                                                                                                                             | 2016 |
| Curative effect of alpha-lipoic acid on peripheral neuropathy in type 2 diabetes: a clinical study                                                                                                  | Liu, , F, Zhang, Y, Yang, M, Liu, B, Shen, YD, Jia, WP; Xiang, KS                                                                                                                       | 2007 |
| Six-month results of a double-blind, placebo-controlled trial of etanercept treatment in patients with active ankylosing spondylitis                                                                | Brandt, , J, Khariouzov, A, Listing, J, Haibel, H, Sörensen, H, Grassnickel, L, Rudwaleit, M, Sieper, J; Braun, J                                                                       | 2003 |
| Rationale and Design of the PROSPECTIVE Trial: probucol Trial for Secondary Prevention of Atherosclerotic Events in Patients with Prior Coronary Heart Disease                                      | Yamashita, , S, Masuda, D, Ohama, T, Arai, H, Bujo, H, Kagimura, T, Kita, T, Matsuzaki, M, Saito, Y, Fukushima, M; Matsuzawa, Y                                                         | 2016 |

|                                                                                                                                                                                                                             |                                                                                                                                                                                                                                                                          |      |
|-----------------------------------------------------------------------------------------------------------------------------------------------------------------------------------------------------------------------------|--------------------------------------------------------------------------------------------------------------------------------------------------------------------------------------------------------------------------------------------------------------------------|------|
| Cardiovascular outcomes and achieved blood pressure in patients with and without diabetes at high cardiovascular risk                                                                                                       | Bohm, , M, Schumacher, H, Teo, KK, Lonn, EM, Mahfoud, F, Mann, JFE, Mancina, G, Redon, J, Schmieder, RE, Marx, N, Sliwa, K, Weber, MA, Williams, B; Yusuf, S                                                                                                             | 2019 |
| Aerobic exercise training does not alter vascular structure and function in chronic obstructive pulmonary disease                                                                                                           | Gelinas, , JC, Lewis, NC, Harper, MI, Melzer, B, Agar, G, Rolf, JD; Eves, ND                                                                                                                                                                                             | 2017 |
| Prevention of reinfection by L-methionine in patients with recurrent urinary tract infection                                                                                                                                | Fünfstück, , R, Straube, E, Schildbach, O; Tietz, U                                                                                                                                                                                                                      | 1997 |
| Erythropoietin improves anemia exercise tolerance and renal function and reduces B-type natriuretic peptide and hospitalization in patients with heart failure and anemia                                                   | Palazzuoli, , A, Silverberg, D, Iovine, F, Capobianco, S, Giannotti, G, Calabrò, A, Campagna, SM; Nuti, R                                                                                                                                                                | 2006 |
| Study of Nasal Insulin to Fight Forgetfulness - Long-acting Insulin Detemir - 120 Days (SL120)                                                                                                                              | NCT01595646                                                                                                                                                                                                                                                              | 2012 |
| CFH and ARMS2 genetic polymorphisms predict response to antioxidants and zinc in patients with age-related macular degeneration                                                                                             | Awah, , CC, Lane, AM, Hawken, S, Zanke, B; Kim, IK                                                                                                                                                                                                                       | 2013 |
| Masitinib in the treatment of active rheumatoid arthritis: results of a multicentre, open-label, dose-ranging, phase 2a study                                                                                               | Tebib, , J, Mariette, X, Bourgeois, P, Flipo, RM, Gaudin, P, Le Loët, X, Gineste, P, Guy, L, Mansfield, CD, Moussy, A, Dubreuil, P, Hermine, O; Sibilia, J                                                                                                               | 2009 |
| Dovitinib versus sorafenib for third-line targeted treatment of patients with metastatic renal cell carcinoma: an open-label, randomised phase 3 trial                                                                      | Motzer, , RJ, Porta, C, Vogelzang, NJ, Sternberg, CN, Szczylak, C, Zolnierak, J, Kollmannsberger, C, Rha, SY, Bjarnason, GA, Melichar, B, De Giorgi, U, Grünwald, V, Davis, ID, Lee, JL, Esteban, E, Urbanowitz, G, Cai, C, Squires, M, Marker, M, Shi, MM; Escudier, B  | 2014 |
| Portfolio of clinical research in adult cardiovascular disease as reflected in clinicalTrials.gov                                                                                                                           | Alexander, , KP, Kong, DF, Starr, AZ, Kramer, J, Chiswell, K, Tasneem, A; Califf, RM                                                                                                                                                                                     | 2013 |
| Clinical experiment of cytokines induced killer cells for treatment of benzene poisoning                                                                                                                                    | Liu, , WW, Chen, JY, Yu, W, Yang, ZQ, Wu, LB, Zhang, C; Yang, DM                                                                                                                                                                                                         | 2007 |
| A randomized controlled trial with an anti-CCL2 (anti-monocyte chemotactic protein 1) monoclonal antibody in patients with rheumatoid arthritis                                                                             | Haringman, , JJ, Gerlag, DM, Smeets, TJ, Baeten, D, van den Bosch, F, Bresnihan, B, Breedveld, FC, Dinant, HJ, Legay, F, Gram, H, Loetscher, P, Schmouder, R, Woodworth, T; Tak, PP                                                                                      | 2006 |
| Natural antioxidants from tomato extract reduce blood pressure in patients with grade-I hypertension: a double-blind, placebo-controlled pilot study                                                                        | Engelhard, , YN, Gazer, B; Paran, E                                                                                                                                                                                                                                      | 2006 |
| Improvement of impaired albumin binding capacity in acute-on-chronic liver failure by albumin dialysis                                                                                                                      | Klammt, , S, Mitzner, SR, Stange, J, Loock, J, Heemann, U, Emmrich, J, Reisinger, EC; Schmidt, R                                                                                                                                                                         | 2008 |
| Serum osteopontin as a predictive marker of responsiveness to methotrexate in juvenile idiopathic arthritis                                                                                                                 | Masi, , L, Ricci, L, Zulian, F, Del Monte, F, Simonini, G, Capannini, S, De Martino, M, Brandi, ML; Falcini, F                                                                                                                                                           | 2009 |
| Cholecalciferol plus calcium suppresses abnormal PBMC reactivity in patients with multiple sclerosis                                                                                                                        | Kimball, , S, Vieth, R, Dosch, HM, Bar-Or, A, Cheung, R, Gagne, D, O'Connor, P, D'Souza, C, Ursell, M; Burton, JM                                                                                                                                                        | 2011 |
| Takotsubo-like myocardial dysfunction in ischemic stroke: a hospital-based registry and systematic literature review                                                                                                        | Jung, , J-M, Kim, J-G, Kim, JB, Cho, K-H, Yu, S, Oh, K, Kim, Y-H, Choi, J-Y; Seo, W-K                                                                                                                                                                                    | 2016 |
| A randomized, double-blind, phase II, exploratory trial evaluating the palliative benefit of either continuing pamidronate or switching to zoledronic acid in patients with high-risk bone metastases from breast cancer    | Jacobs, , C, Kuchuk, I, Bouganim, N, Smith, S, Mazzarello, S, Vandermeer, L, Dranitsaris, G, Dent, S, Gertler, S, Verma, S, Song, X, Simos, S, Cella, D; Clemons, M                                                                                                      | 2016 |
| Treatment of light chain amyloidosis                                                                                                                                                                                        | Palladini, , G; Milani, P                                                                                                                                                                                                                                                | 2017 |
| Combination of branched-chain amino acid and angiotensin-converting enzyme inhibitor improves liver fibrosis progression in patients with cirrhosis                                                                         | Yoshiji, , H, Noguchi, R, Ikenaka, Y, Kaji, K, Aihara, Y, Douhara, A, Yamao, J, Toyohara, M, Mito, A, Sawai, M, Yoshida, M, Morioka, C, Fujimoto, M, Uemura, M; Fukui, H                                                                                                 | 2012 |
| Hydrogel Spacer Prospective Multicenter Randomized Controlled Pivotal Trial: dosimetric and Clinical Effects of Perirectal Spacer Application in Men Undergoing Prostate Image Guided Intensity Modulated Radiation Therapy | Mariados, , N, Sylvester, J, Shah, D, Karsh, L, Hudes, R, Beyer, D, Kurtzman, S, Bogart, J, Hsi, RA, Kos, M, Ellis, R, Logsdon, M, Zimberg, S, Forsythe, K, Zhang, H, Soffen, E, Francke, P, Mantz, C, Rossi, P, Deweese, T, Hamstra, DA, Bosch, W, Gay, H; Michalski, J | 2015 |
| Ethylglucuronide based continence management for alcohol in seriously mentally ill outpatients                                                                                                                              | McDonnell, , MG, Leickly, E, McPherson, S, Skalisky, J, Nepom, JR, Srebnik, D, Roll, JM; Ries, RK                                                                                                                                                                        | 2016 |
| Potential spironolactone effects on collagen metabolism biomarkers in patients with uncontrolled blood pressure                                                                                                             | Ferreira, , JP, Rossignol, P, Pizard, A, MacHu, J-L, Collier, T, Girerd, N, Huby, A-C, Gonzalez, A, Diez, J, Lopez, B, Sattar, N, Cleland, JG, Sever, PS; Zannad, F                                                                                                      | 2018 |
| Efficacy comparison of Pueraria mirifica (PM) against conjugated equine estrogen (CEE) with/without medroxyprogesterone acetate (MPA) in the treatment of climacteric symptoms in perimenopausal women: phase III study     | Chandeying, , V; Sangthawan, M                                                                                                                                                                                                                                           | 2007 |
| A review of teriparatide and its clinical efficacy in the treatment of osteoporosis                                                                                                                                         | Dobnig, H                                                                                                                                                                                                                                                                | 2004 |
| Treating to target patients with primary hyperlipidaemia: comparison of the effects of ATORvastatin and ROSuvastatin (the ATOROS study)                                                                                     | Milionis, , HJ, Rizos, E, Kostapanos, M, Filippatos, TD, Gazi, IF, Ganotakis, ES, Goudevenos, J, Mikhailidis, DP; Elisaf, MS                                                                                                                                             | 2006 |
| Is the therapeutic efficacy of coenzyme Q10 replicated in a geographical subgroup of the Q-SYMBIO study?                                                                                                                    | Mortensen, , SA, Dolliner, P, Filipiak, KJ, Alehagen, U, Pella, D, Steurer, G, Littarru, GP, Kumar, A; Rosenfeldt, F                                                                                                                                                     | 2015 |
| Few adverse effects of long-term creatine supplementation in a placebo-controlled trial                                                                                                                                     | Groeneveld, , GJ, Beijer, C, Veldink, JH, Kalmijn, S, Wokke, JH; van den Berg, LH                                                                                                                                                                                        | 2005 |
| Long term outcome of bisphosphonate therapy in patients with primary hyperparathyroidism                                                                                                                                    | Segula, , D, Nikolova, S, Marks, E, Ranganath, L; Mishra, V                                                                                                                                                                                                              | 2014 |
| One-year overall survival (OS) and biomarker correlates from a phase II study of ipilimumab (IPI) with carboplatin and paclitaxel (CP) in patients with unresectable stage III or IV metastatic melanoma (MM)               | Jamal, , R, Van Kempen, L, Thebault, P, Belanger, K, Friedmann, JE, Ayoub, J-PM, Cocolakis, E, Kazemi, S, Dionne, J, Lambert, C, Le, HB, Grange, C, Cailhier, J-F, Spatz, A, Lapointe, R; Miller, WH                                                                     | 2015 |

|                                                                                                                                                                                                                                                                                                                                                                                                                                                                                                                                           |                                                                                                                                                                                                                                                                |      |
|-------------------------------------------------------------------------------------------------------------------------------------------------------------------------------------------------------------------------------------------------------------------------------------------------------------------------------------------------------------------------------------------------------------------------------------------------------------------------------------------------------------------------------------------|----------------------------------------------------------------------------------------------------------------------------------------------------------------------------------------------------------------------------------------------------------------|------|
| A randomized, double-blind, placebo-controlled, parallel-group study to assess the efficacy and safety of dual ACE/NEP inhibitor GW660511X in mild-to-moderate hypertensive patients                                                                                                                                                                                                                                                                                                                                                      | Johnson, , AG, Pearce, GL; Danoff, TM                                                                                                                                                                                                                          | 2006 |
| Childhood and adolescent large-cell lymphoma (LCL): a review of the Children's Cancer Group experience                                                                                                                                                                                                                                                                                                                                                                                                                                    | Cairo, , MS, Sposto, R, Hoover-Regan, M, Meadows, AT, Anderson, JR, Siegel, SE, Kadin, ME, Kjeldsberg, CR, Wilson, JF, Perkins, SL, Lones, MA, Morris, E; Finlay, JL                                                                                           | 2003 |
| The ideal time of systemic metronidazole and amoxicillin administration in the treatment of severe periodontitis: study protocol for a randomized controlled trial                                                                                                                                                                                                                                                                                                                                                                        | Feres, , M, Retamal-Valdes, B, Mestnik, MJ, de Figueiredo, LC, Faveri, M, Duarte, PM, Fritoli, A, Faustino, E, Souto, MLS, de Franco Rodrigues, M, Giudicissi, M, Nogueira, BCL, Saraiva, L, Romito, GA; Pannuti, CM                                           | 2018 |
| Analysis of minimal residual disease in follicular lymphoma patients in gadolin, a phase III study of obinutuzumab plus bendamustine versus bendamustine in relapsed/refractory indolent non-hodgkin lymphoma                                                                                                                                                                                                                                                                                                                             | Pott, , C, Belada, D, Danesi, N, Fingerle-Rowson, G, Gribben, J, Harbron, C, Hoster, E, S Kahl B, , Mundt, K, Sebban, C, Sehn, LH; Cheson, BD                                                                                                                  | 2015 |
| Assessment of inhaled BDP-dose dependency of exhaled nitric oxide and local and serum eosinophilic markers in steroids-naïve nonatopic asthmatics                                                                                                                                                                                                                                                                                                                                                                                         | Dal Negro, , R, Micheletto, C, Tognella, S, Turco, P, Rossetti, A; Cantini, L                                                                                                                                                                                  | 2003 |
| Clinical characteristics predict benefits from eptifibatide therapy during coronary stenting: insights from the enhanced suppression of the platelet IIb/IIIa receptor with integrilin therapy (ESPRIT) Trial                                                                                                                                                                                                                                                                                                                             | Puma, , JA, Banko, LT, Pieper, KS, Sacchi, TJ, O'Shea, JC, Dery, JP; Tchong, JE                                                                                                                                                                                | 2006 |
| Comparison of additional metformin or NPH insulin to mealtime insulin lispro therapy with mealtime human insulin therapy in secondary OAD failure                                                                                                                                                                                                                                                                                                                                                                                         | Altuntas, , Y, Ozen, B, Ozturk, B, Sengul, A, Ucak, S, Ersoy, O; Karul, S                                                                                                                                                                                      | 2003 |
| Effects of renin-angiotensin-aldosterone system inhibitors and beta-blockers on markers of arterial stiffness                                                                                                                                                                                                                                                                                                                                                                                                                             | Koumaras, , C, Tziomalos, K, Stavrinou, E, Katsiki, N, Athyros, VG, Mikhailidis, DP; Karagiannis, A                                                                                                                                                            | 2014 |
| Eosinophil-guided corticosteroid therapy in patients admitted to hospital with COPD exacerbation (CORTICO-COP): a multicentre, randomised, controlled, open-label, non-inferiority trial                                                                                                                                                                                                                                                                                                                                                  | Sivapalan, , P, Lapperre, TS, Janner, J, Laub, RR, Moberg, M, Bech, CS, Eklof, J, Holm, FS, Armbruster, K, Sivapalan, P, Mosbech, C, Ali, AKM, Seersholm, N, Wilcke, JT, Brondum, E, Sonne, TP, Ronholt, F, Andreassen, HF, Ulrik, CS, Vestbo, J; Jensen, J-US | 2019 |
| Effects of Freeze-Dried Grape Powder on High-Density Lipoprotein Function in Adults with Metabolic Syndrome: a Randomized Controlled Pilot Study                                                                                                                                                                                                                                                                                                                                                                                          | Millar, , CL, Duclos, Q, Garcia, C, Norris, GH, Lemos, BS, DiMarco, DM, Fernandez, ML; Blesso, CN                                                                                                                                                              | 2018 |
| Study of the Efficacy and Safety of Olokizumab in Patients with Moderately to Severely Active Rheumatoid Arthritis                                                                                                                                                                                                                                                                                                                                                                                                                        | EUCTR2015-005309-35-HU                                                                                                                                                                                                                                         | 2017 |
| A Study of the Efficacy and Safety of Atezolizumab Plus Chemotherapy for Patients With Early Relapsing Recurrent Triple-Negative Breast Cancer                                                                                                                                                                                                                                                                                                                                                                                            | RPEC00000280                                                                                                                                                                                                                                                   | 2018 |
| Combretastin A-4 phosphate in combination with carboplatin and paclitaxel chemotherapy in patients with advanced cancer                                                                                                                                                                                                                                                                                                                                                                                                                   | ISRCTN57858356                                                                                                                                                                                                                                                 | 2010 |
| GOLMePsA                                                                                                                                                                                                                                                                                                                                                                                                                                                                                                                                  | EUCTR2013-004122-28-GB                                                                                                                                                                                                                                         | 2015 |
| Development of measuring method to monitor progression of cognitive decline and its improvement by intervention in dementia and mild cognitive impairment (MCI)                                                                                                                                                                                                                                                                                                                                                                           | JPRN-UMIN000025053                                                                                                                                                                                                                                             | 2016 |
| The CURE - CD Trial                                                                                                                                                                                                                                                                                                                                                                                                                                                                                                                       | NCT03555058                                                                                                                                                                                                                                                    | 2018 |
| A prospective open randomised controlled trial of women diagnosed with premature ovarian failure (POF) to investigate the effects of active treatment with HRT (hormone replacement therapy) or COCP (combined oral contraceptive pill), and observation of patients who choose to have no treatment, on bone density, markers of cardiovascular disease, markers of bone metabolism, menopausal symptoms, quality of life, depression score, sexual function and ovarian function over 2 years. - Treatment of Premature Ovarian Failure | EUCTR2008-002599-86-GB                                                                                                                                                                                                                                         | 2009 |
| Alzheimer Disease Proof of Concept Study with BI 409306 versus Placebo                                                                                                                                                                                                                                                                                                                                                                                                                                                                    | EUCTR2013-005031-24-BE                                                                                                                                                                                                                                         | 2014 |
| AN OPEN-LABEL, RANDOMIZED PHASE 3 TRIAL OF NIVOLUMAB, OR NIVOLUMAB PLUS IPILIMUMAB, VERSUS PLATINUM DOUBLET CHEMOTHERAPY IN SUBJECTS WITH CHEMOTHERAPY-NAÏVE STAGE IV OR RECURRENT NON-SMALL CELL LUNG CANCER (NSCLC)                                                                                                                                                                                                                                                                                                                     | PER-049-15                                                                                                                                                                                                                                                     | 2016 |
| Ginger effect on chemotherapy-induced neuropathy                                                                                                                                                                                                                                                                                                                                                                                                                                                                                          | IRCT2013121415780N1                                                                                                                                                                                                                                            | 2014 |
| Acute effects of continuous positive air way pressure on pulse pressure in chronic heart failure                                                                                                                                                                                                                                                                                                                                                                                                                                          | Quintão, , M, Chermont, S, Marchese, L, Brandão, L, Bernardez, SP, Mesquita, ET, Novaes Rocha, Nd; Nóbrega, AC                                                                                                                                                 | 2014 |
| Assessment of the probiotic Symprove as a dietary supplement in patients with symptomatic diverticular disease                                                                                                                                                                                                                                                                                                                                                                                                                            | ISRCTN71661079                                                                                                                                                                                                                                                 | 2013 |
| A randomised, double-blind, one-year controlled trial comparing Aclasta (zoledronic acid) 5 mg intravenously (i/v) against placebo infusion in patients with anti-epileptic (AED) drug induced bone loss                                                                                                                                                                                                                                                                                                                                  | ACTRN12611000507987                                                                                                                                                                                                                                            | 2011 |
| A study evaluating the effects of RGB-03 and MabThera combined with Methotrexate in patients with Rheumatoid Arthritis                                                                                                                                                                                                                                                                                                                                                                                                                    | EUCTR2014-003255-54-CZ                                                                                                                                                                                                                                         | 2014 |
| Effect of an oral nutritional supplement therapy on muscle mass, bone metabolism, body composition, growth, and disease activity in pediatric Crohn's Disease: a controlled trial                                                                                                                                                                                                                                                                                                                                                         | DRKS00010278                                                                                                                                                                                                                                                   | 2016 |
| A RANDOMIZED, DOUBLE-BLIND, PHASE 3 STUDY OF THE JAK1/2 INHIBITOR RUXOLITINIB OR PLACEBO IN COMBINATION WITH CAPECITABINE IN SUBJECTS WITH ADVANCED OR METASTATIC ADENOCARCINOMA OF THE                                                                                                                                                                                                                                                                                                                                                   | PER-001-15                                                                                                                                                                                                                                                     | 2015 |

|                                                                                                                                                                                                                                                                                                                              |                                                                                                                                        |      |
|------------------------------------------------------------------------------------------------------------------------------------------------------------------------------------------------------------------------------------------------------------------------------------------------------------------------------|----------------------------------------------------------------------------------------------------------------------------------------|------|
| PANCREAS WHO HAVE FAILED OR ARE INTOLERANT TO FIRST-LINE CHEMOTHERAPY (THE JANUS 2 STUDY)                                                                                                                                                                                                                                    |                                                                                                                                        |      |
| Prospective, phase II randomized study to compare busulfan-fludarabine reduced-intensity conditioning (RIC) with thiotepa-fludarabine RIC regimen prior to allogeneic transplantation of hematopoietic cells for the treatment of myelofibrosis                                                                              | EUCTR2010-022052-23-IT                                                                                                                 | 2011 |
| Multicenter phase II study of modified FOLFOX6 and bevacizumab in chemo-naïve advanced or recurrent colorectal cancer                                                                                                                                                                                                        | JPRN-UMIN000001490                                                                                                                     | 2008 |
| OUTREACH study: urine analysis and antihypertensive treatment                                                                                                                                                                                                                                                                | ISRCTN15911100                                                                                                                         | 2017 |
| Double-blind trial of the efficacy of pentoxifylline vs thalidomide for the treatment of type II reaction in leprosy                                                                                                                                                                                                         | Sales, , AM, de Matos, HJ, Nery, JA, Duppre, NC, Sampaio, EP; Sarno, EN                                                                | 2007 |
| A randomized controlled trial of the effect of substantial weight loss on obstructive sleep apnoea as measured by the apnoea/hypopnoea index                                                                                                                                                                                 | ACTRN12605000161628                                                                                                                    | 2005 |
| Sulfasalazine in the treatment of spondylarthropathy. A randomized, multicenter, double-blind, placebo-controlled study                                                                                                                                                                                                      | Dougados, , M, van der Linden, S, Leirisalo-Repo, M, Huitfeldt, B, Juhlin, R, Veys, E, Zeidler, H, Kvien, TK, Olivieri, I; Dijkmans, B | 1995 |
| PPALM - Palm oil and Pentoxifylline Against Late Morbidity                                                                                                                                                                                                                                                                   | EUCTR2012-004211-31-GB                                                                                                                 | 2014 |
| A trial to assess whether the addition of atezolizumab to current standard treatment for patients with relapsed or refractory Diffuse Large B-Cell Lymphoma, who are not able to have high dose therapy, improves survival outcomes                                                                                          | ISRCTN11965217                                                                                                                         | 2017 |
| A study to test how well a new medicine called sirukumab works in patients with Severe Uncontrolled Asthma                                                                                                                                                                                                                   | EUCTR2016-001244-19-ES                                                                                                                 | 2016 |
| Are inorganic nitrates protective for fatty liver?                                                                                                                                                                                                                                                                           | ISRCTN36524222                                                                                                                         | 2017 |
| Can atorvastatin improve vascular function in women with a history of preeclampsia? A Randomised, double-blinded, placebo-controlled crossover trial of atorvastatin in women with a history of preeclampsia. - Preeclampsia Vascular Studies Project 3 PVS3                                                                 | EUCTR2008-005759-21-GB                                                                                                                 | 2011 |
| Edoxaban treatment versus anticoagulant treatment (here Vitamin K antagonist) in patients with atrial fibrillation undergoing a catheter ablation                                                                                                                                                                            | EUCTR2016-003069-25-HU                                                                                                                 | 2017 |
| Genetic determinants of the response to bezafibrate treatment in the lower extremity arterial disease event reduction (LEADER) trial                                                                                                                                                                                         | Jamshidi, , Y, Flavell, DM, Hawe, E, MacCallum, PK, Meade, TW; Humphries, SE                                                           | 2002 |
| Osteogenesis and osteoclast inhibition in rheumatoid arthritis patients after more than 4 years of treatment with bisphosphonates or bisphosphonates with pitavastatin                                                                                                                                                       | ISRCTN45993953                                                                                                                         | 2012 |
| Randomised Controlled Trial Addressing Wound Debridement Frequency and Healing Outcomes in Diabetic Foot Ulcers                                                                                                                                                                                                              | ACTRN12618000703202                                                                                                                    | 2018 |
| Ayurvedic treatment for Metabolic Syndrome a disease which includes obesity, elevated blood pressure, abnormal lipids with early diabetes at one place                                                                                                                                                                       | CTRI/2015/06/005899                                                                                                                    | 2015 |
| OPEN LABEL RANDOMIZED BIOEQUIVALENCE STUDY TO EVALUATE THE PHARMACOKINETIC (PK) AND SAFETY PROFILE OF BEVACIZUMAB BIOSIMILAR (BEVZ92) IN COMBINATION WITH FOLFOX OR FOLFIRI VERSUS BEVACIZUMAB (AVASTIN®) IN COMBINATION WITH FOLFOX OR FOLFIRI AS FIRST-LINE TREATMENT IN PATIENTS WITH METASTATIC COLORECTAL CANCER (MCRC) | PER-076-13                                                                                                                             | 2014 |
| The ALPHA Trial                                                                                                                                                                                                                                                                                                              | EUCTR2014-002305-38-GB                                                                                                                 | 2014 |
| A study in newborn children in need for intensive treatment resulting from insufficient oxygen supply to the brain                                                                                                                                                                                                           | EUCTR2011-002502-74-LT                                                                                                                 | 2011 |
| A Randomized, Open-Label, Active-Controlled Study of the Safety, Efficacy, and Pharmacokinetics of Ferumoxytol Compared with Oral Iron for the Treatment of Iron Deficiency Anemia in Pediatric Subjects with Nondialysis-dependent Chronic Kidney Disease                                                                   | EUCTR2010-019388-12-RO                                                                                                                 | 2011 |
| IBDmindfulness-mindfulness for youth with Inflammatory Bowel Disease (IBD) and depression trial                                                                                                                                                                                                                              | ACTRN12617000876392                                                                                                                    | 2017 |
| A 4-week double-blind placebo-controlled pilot study, evaluating niacin-induced flushing and lipid parameter effects of V0002 CA 1g 3 capsules/day associated with Niaspan® (from 375 mg to 1000 mg) in addition to usual care statin, in patients suffering from dyslipidemia with uncontrolled elevated triglycerides      | EUCTR2007-006393-29-FR                                                                                                                 | 2008 |
| A randomized controlled trial for Qingjinhua-zhuo formula for shortening course of antibiotic treatment of infectious acute exacerbation of chronic obstructive pulmonary disease (AECOPD)                                                                                                                                   | ChiCTR1800019723                                                                                                                       | 2018 |
| Aspirin as a new treatment for a disease called ARDS                                                                                                                                                                                                                                                                         | EUCTR2014-002564-32-GB                                                                                                                 | 2015 |
| A phase 2, double-blind, placebo-controlled study of the safety and tolerability of etanercept in patients with Alzheimer's disease - Safety and Tolerability of Etanercept in Alzheimer's Disease                                                                                                                           | EUCTR2009-013400-31-GB                                                                                                                 | 2010 |
| A CR-UK phase I study of BKM120 in patients with non-small cell lung cancer (NSCLC) receiving thoracic radiotherapy                                                                                                                                                                                                          | ISRCTN04813360                                                                                                                         | 2013 |
| A study to assess the efficacy and safety of GSK2586184 in SLE                                                                                                                                                                                                                                                               | EUCTR2012-001645-41-SE                                                                                                                 | 2012 |
| Prospective randomized ARMYDA 600x2 STUDY                                                                                                                                                                                                                                                                                    | EUCTR2011-006210-13-IT                                                                                                                 | 2012 |

|                                                                                                                                                                                                                                                                                                     |                                                                                                                                                                                                                           |      |
|-----------------------------------------------------------------------------------------------------------------------------------------------------------------------------------------------------------------------------------------------------------------------------------------------------|---------------------------------------------------------------------------------------------------------------------------------------------------------------------------------------------------------------------------|------|
| A study to investigate the efficacy of sirukumab in addition to the current antidepressant treatment in adults with depression                                                                                                                                                                      | EUCTR2014-005206-37-PL                                                                                                                                                                                                    | 2015 |
| A Study of Gantenerumab in Patients with Mild Alzheimer Disease                                                                                                                                                                                                                                     | EUCTR2013-003390-95-BE                                                                                                                                                                                                    | 2014 |
| Clinical Efficacy and Safety of Baminercept, a Lymphotoxin $\beta$ Receptor Fusion Protein, in Primary Sjögren's Syndrome: results From a Phase II Randomized, Double-Blind, Placebo-Controlled Trial                                                                                               | St Clair, , EW, Baer, AN, Wei, C, Noaiseh, G, Parke, A, Coca, A, Utset, TO, Genovese, MC, Wallace, DJ, McNamara, J, Boyle, K, Keyes-Elstein, L, Browning, JL, Franchimont, N, Smith, K, Guthridge, JM, Sanz, I; James, JA | 2018 |
| The MET REMODEL Study                                                                                                                                                                                                                                                                               | EUCTR2014-003189-26-GB                                                                                                                                                                                                    | 2014 |
| CALC trial: aprepitant for the treatment of cough in lung cancer                                                                                                                                                                                                                                    | ISRCTN16200035                                                                                                                                                                                                            | 2013 |
| REMODEL-AMI                                                                                                                                                                                                                                                                                         | EUCTR2014-005407-24-CZ                                                                                                                                                                                                    | 2015 |
| Comparative bioavailability/ bioequivalence study of Lutein formulations - Product C and Product D (Lutein 20 mg/capsule) supplementation in healthy, adult humans, after receiving high-fat, high-calorie breakfast                                                                                | CTRI/2018/08/015403                                                                                                                                                                                                       | 2018 |
| Randomised controlled trial evaluating strategies to optimize disease activity control in RA patients treated with infliximab in clinical practice. - Re3                                                                                                                                           | EUCTR2005-001889-13-PT                                                                                                                                                                                                    | 2006 |
| A Randomized, Open-Label, Phase III Study of Taxane Based Chemotherapy With Lapatinib or Trastuzumab as First-Line Therapy for Women With Human Epidermal Growth Factor Receptor 2 (HER2)/Neu Positive Metastatic Breast Cancer                                                                     | ACTRN12609000143224                                                                                                                                                                                                       | 2009 |
| Effect of azithromycin treatment on endothelial function in patients with coronary artery disease and evidence of Chlamydia pneumoniae infection                                                                                                                                                    | Parchure, , N, Zouridakis, EG; Kaski, JC                                                                                                                                                                                  | 2002 |
| Crossover and randomized clinical trial on the effect of Resincolestiramine in the intestinal absorption of new uremic toxins in patients in hemodialysis with chronic renal insufficiency                                                                                                          | EUCTR2017-001899-32-ES                                                                                                                                                                                                    | 2017 |
| PPALM - Palm oil and Pentoxifylline Against Late Morbidity                                                                                                                                                                                                                                          | ISRCTN17415294                                                                                                                                                                                                            | 2015 |
| Effect of Liraglutide on lipid synthesis and metabolism after mixed meal. A single-center randomized controlled study                                                                                                                                                                               | EUCTR2013-005075-40-FI                                                                                                                                                                                                    | 2014 |
| Study with investigational drug PF-06463922 and comparator crizotinib in patients with a specific type of advanced lung cancer                                                                                                                                                                      | EUCTR2016-003315-35-PL                                                                                                                                                                                                    | 2017 |
| Comparison of two antiplatelet agents in patients with acute coronary syndrome                                                                                                                                                                                                                      | EUCTR2012-002404-41-IT                                                                                                                                                                                                    | 2012 |
| Role of VSL#3 in patients with nonalcoholic fatty liver disease                                                                                                                                                                                                                                     | CTRI/2008/091/000074                                                                                                                                                                                                      | 2008 |
| Zoledronic acid in the management of Mesothelioma - a feasibility trial                                                                                                                                                                                                                             | EUCTR2015-004433-26-GB                                                                                                                                                                                                    | 2016 |
| Multi-centre, European study to compare how well the standard course of the antibiotic vancomycin works compared to a new vancomycin course in babies aged less than 91 days with sepsis occurring after 3 days of life                                                                             | EUCTR2015-000203-89-EE                                                                                                                                                                                                    | 2016 |
| A Phase IIb, Multicenter, Randomized, Double-Blind, Placebo-Controlled Dose-Ranging Study to Evaluate the Safety, Tolerability and Efficacy of Two Doses of Subcutaneous IPP-201101 Plus Standard of Care, Versus Placebo Plus Standard of Care in Subjects with Systemic Lupus Erythematosus (SLE) | EUCTR2007-004892-21-BG                                                                                                                                                                                                    | 2008 |
| Orally inhaled heparin in patients with cystic fibrosis (CF)                                                                                                                                                                                                                                        | ACTRN12610000328077                                                                                                                                                                                                       | 2010 |
| Phase II study Nivolumab in previously treated non-small-cell lung cancer subjects to evaluate the peripheral blood mononuclear cell immunological biomarker                                                                                                                                        | JPRN-UMIN000028468                                                                                                                                                                                                        | 2017 |
| Prognostic value of serum cardiac troponin I and T in chronic dialysis patients: a 1-year outcomes analysis                                                                                                                                                                                         | Apple, , FS, Sharkey, SW, Hoeft, P, Skeate, R, Voss, E, Dahlmeier, BA; Preese, LM                                                                                                                                         | 1997 |
| Study of a new drug's effect on anemia in subjects with impaired kidney function who are not on dialysis                                                                                                                                                                                            | EUCTR2012-004050-29-DE                                                                                                                                                                                                    | 2012 |
| Randomized controlled trial of a TiO2 Semiconductor toothbrush on mild-to-moderate periodontitis                                                                                                                                                                                                    | Quest, DW                                                                                                                                                                                                                 | 2015 |
| PAF-acetylhydrolase activity in plasma of patients with chronic kidney disease. Effect of long-term therapy with erythropoietin                                                                                                                                                                     | Papavasiliou, , EC, Gouva, C, Siamopoulos, KC; Tselepis, AD                                                                                                                                                               | 2006 |
| Comparison of efficacy between combination therapy with iguratimod and sulfasalazine with methotrexate in Japanese patients with rheumatoid arthritis: propensity score analysis                                                                                                                    | Tokunaga, , K, Shiraishi, A, Oshikawa, H, Hagino, N, Nishino, J; Tohma, S                                                                                                                                                 | 2017 |
| Adding monounsaturated fatty acids to a dietary portfolio of cholesterol-lowering foods in hypercholesterolemia                                                                                                                                                                                     | Jenkins, , DJ, Chiavaroli, L, Wong, JM, Kendall, C, Lewis, GF, Vidgen, E, Connelly, PW, Leiter, LA, Josse, RG; Lamarche, B                                                                                                | 2010 |
| Clinical efficacy and immunological effects of weekly administration of interferon- $\beta$ in patients with type B chronic hepatitis                                                                                                                                                               | Katayama, , K, Hayashi, N, Ito, T, Masuzawa, M, Kishida, Y, Yoshihara, H, Akeyama, T, Shimizu, Y, Moriyama, M, Kasahara, A, Fusamoto, H; Kamada, T                                                                        | 1999 |
| Ixekizumab treatment shows a neutral impact on cardiovascular parameters in patients with moderate-to-severe plaque psoriasis: results from UNCOVER-1, UNCOVER-2, and UNCOVER-3                                                                                                                     | Egeberg, , A, Wu, JJ, Korman, N, Solomon, JA, Goldblum, O, Zhao, F; Mallbris, L                                                                                                                                           | 2018 |
| Effect of catheter ablation on the left ventricular mass index and other echocardiograph parameters in atrial fibrillation patients: comparison with antiarrhythmic drug treatment                                                                                                                  | Kim, , K-H, Na, JO, Nam, G-B, Jin, E-S, Choi, H, Kim, S-H, Choi, K-J; Kim, Y-H                                                                                                                                            | 2011 |



|                                                                                                                                                                                                                                                                                   |                                                                                                                                                                                                                                                                 |      |
|-----------------------------------------------------------------------------------------------------------------------------------------------------------------------------------------------------------------------------------------------------------------------------------|-----------------------------------------------------------------------------------------------------------------------------------------------------------------------------------------------------------------------------------------------------------------|------|
| The effect of vitamin D supplementation on serum lipids in postmenopausal women with diabetes: a randomized controlled trial                                                                                                                                                      | Munoz-Aguirre, , P, Flores, M, Macias, N, Quezada, AD, Denova-Gutierrez, E; Salmeron, J                                                                                                                                                                         | 2015 |
| Rheohaemapheresis in the treatment of nonvascular age-related macular degeneration                                                                                                                                                                                                | Blaha, , M, Rencova, E, Langrova, H, Studnicka, J, Blaha, V, Rozsival, P, Lanska, M; Sobotka, L                                                                                                                                                                 | 2013 |
| Oral ferrous fumarate or intravenous iron sucrose for patients with inflammatory bowel disease                                                                                                                                                                                    | Erichsen, , K, Ulvik, RJ, Nysaeter, G, Johansen, J, Ostborg, J, Berstad, A, Berge, RK; Hausken, T                                                                                                                                                               | 2005 |
| Effects of a Combined Nutraceutical on Lipid Pattern, Glucose Metabolism and Inflammatory Parameters in Moderately Hypercholesterolemic Subjects: a Double-blind, Cross-over, Randomized Clinical Trial                                                                           | Cicero, , AF, Colletti, A, Fogacci, F, Bove, M, Rosticci, M; Borghi, C                                                                                                                                                                                          | 2017 |
| Use of cytokines in the treatment of acute myelocytic leukemia: a critical review                                                                                                                                                                                                 | Geller, RB                                                                                                                                                                                                                                                      | 1996 |
| Results from a Phase IIA Parallel Group Study of JNJ-40346527, an Oral CSF-1R Inhibitor, in Patients with Active Rheumatoid Arthritis despite Disease-modifying Antirheumatic Drug Therapy                                                                                        | Genovese, , MC, Hsia, E, Belkowsky, SM, Chien, C, Masterson, T, Thurmond, RL, Manthey, CL, Yan, XD, Ge, T, Franks, C; Greenspan, A                                                                                                                              | 2015 |
| Peroxisome proliferator-activated receptor $\gamma$ agonist effect on rheumatoid arthritis: a randomized controlled trial                                                                                                                                                         | Ormseth, , MJ, Oeser, AM, Cunningham, A, Bian, A, Shintani, A, Solus, J, Tanner, S; Stein, CM                                                                                                                                                                   | 2013 |
| Xuezhikang, an extract of cholestin, protects endothelial function through antiinflammatory and lipid-lowering mechanisms in patients with coronary heart disease                                                                                                                 | Zhao, , SP, Liu, L, Cheng, YC, Shishehbor, MH, Liu, MH, Peng, DQ; Li, YL                                                                                                                                                                                        | 2004 |
| Bay leaves improve glucose and lipid profile of people with type 2 diabetes                                                                                                                                                                                                       | Khan, , A, Zaman, G; Anderson, RA                                                                                                                                                                                                                               | 2009 |
| Comparison of effectiveness of rosuvastatin versus atorvastatin on the achievement of combined C-reactive protein (<2 mg/L) and low-density lipoprotein cholesterol (< 70 mg/dl) targets in patients with type 2 diabetes mellitus (from the ANDROMEDA study)                     | Betteridge, , DJ, Gibson, JM; Sager, PT                                                                                                                                                                                                                         | 2007 |
| Eicosapentaenoic acid for the prevention of recurrent atrial fibrillation                                                                                                                                                                                                         | Watanabe, , E, Sobue, Y, Sano, K, Okuda, K, Yamamoto, M; Ozaki, Y                                                                                                                                                                                               | 2011 |
| Itraconazole comedication increases systemic levels of inhaled fluticasone in lung transplant recipients                                                                                                                                                                          | Naef, , R, Schmid, C, Hofer, M, Minder, S, Speich, R; Boehler, A                                                                                                                                                                                                | 2007 |
| Initial treatment with rosiglitazone/metformin fixed-dose combination therapy compared with monotherapy with either rosiglitazone or metformin in patients with uncontrolled type 2 diabetes                                                                                      | Rosenstock, , J, Rood, J, Cobitz, A, Biswas, N, Chou, H; Garber, A                                                                                                                                                                                              | 2006 |
| Effects of anthocyanins on cardiovascular risk factors and inflammation in pre-hypertensive men: a double-blind randomized placebo-controlled crossover study                                                                                                                     | Hassellund, , SS, Flaa, A, Kjeldsen, SE, Seljeflot, I, Karlsen, A, Erlund, I; Rostrup, M                                                                                                                                                                        | 2013 |
| DHA-enriched high-oleic acid canola oil improves lipid profile and lowers predicted cardiovascular disease risk in the canola oil multicenter randomized controlled trial                                                                                                         | Jones, , PJ, Senanayake, VK, Pu, S, Jenkins, DJ, Connelly, PW, Lamarche, B, Couture, P, Charest, A, Baril-Gravel, L, West, SG, Liu, X, Fleming, JA, McCrea, CE; Kris-Etherton, PM                                                                               | 2014 |
| The effects of garlic extract upon endothelial function, vascular inflammation, oxidative stress and insulin resistance in adults with type 2 diabetes at high cardiovascular risk. A pilot double blind randomized placebo controlled trial                                      | Atkin, , M, Laight, D; Cummings, MH                                                                                                                                                                                                                             | 2016 |
| The rate of clinical progression and brain atrophy is greater with increasing severity of Alzheimer's disease: results from the volumetric MRI substudies of two phase III trials with bapineuzumab                                                                               | Novak, , G, Einstein, S, Tudor, IC, Gregg, K, Collins, P, Wyman, B, Yuen, E, Nielsen, C, Grundman, M, Brashear, RH, Fox, N; Liu, E                                                                                                                              | 2013 |
| A phase Ib study of alpelisib (BYL719), a PI3K $\alpha$ -specific inhibitor, with letrozole in ER+/HER2- metastatic breast cancer                                                                                                                                                 | Mayer, , IA, Abramson, VG, Formisano, L, Balko, JM, Estrada, MV, Sanders, ME, Juric, D, Solit, D, Berger, MF, Won, HH, Li, Y, Cantley, LC, Winer, E; Arteaga, CL                                                                                                | 2017 |
| Baicalin reduces blood lipids and inflammation in patients with coronary artery disease and rheumatoid arthritis: a randomized, double-blind, placebo-controlled trial                                                                                                            | Hang, , Y, Qin, X, Ren, T; Cao, J                                                                                                                                                                                                                               | 2018 |
| DEMO-II trial. Aerobic exercise versus stretching exercise in patients with major depression-a randomised clinical trial                                                                                                                                                          | Krogh, , J, Videbech, P, Thomsen, C, Gluud, C; Nordentoft, M                                                                                                                                                                                                    | 2012 |
| Effects of Long-Term Etanercept Treatment on Clinical Outcomes and Objective Signs of Inflammation in Early Nonradiographic Axial Spondyloarthritis: 104-Week Results From a Randomized, Placebo-Controlled Study                                                                 | Dougados, , M, van der Heijde, D, Sieper, J, Braun, J, Citera, G, Lenaerts, J, van den Bosch, F, Wei, JC, Pedersen, R, Bonin, R, Jones, H, Marshall, L, Logeart, I, Vlahos, B, Bukowski, JF; Maksymowycz, WP                                                    | 2017 |
| Effect of interval exercise training programme on C-reactive protein in the non-pharmacological management of hypertension: a randomized controlled trial                                                                                                                         | Lamina, , S; Okoye, GC                                                                                                                                                                                                                                          | 2012 |
| Beneficial Effects of Pentoxifylline Plus Losartan Dual Therapy in Type 2 Diabetes with Nephropathy                                                                                                                                                                               | Rabizadeh, , S, Dehghani Firouzabadi, F, Noshad, S, Esteghamati, S, Afarideh, M, Ghajar, A, Ganji, M, Saadat, M, Heidari, B, Najafi, MT, Nakhjavani, M; Esteghamati, A                                                                                          | 2018 |
| Drug concentrations, adherence, patient-reported symptoms and health-related quality of life in HIV-infected, virologically controlled patients switching to maraviroc+darunavir/ritonavir or continuing the previous triple therapy: sub-studies from the randomized GUSTA trial | Rossetti, , B, Gagliardini, R, Lisi, L, Masini, M, Lamonica, S, Vignale, F, Sterrantino, G, Orofino, G, Colafigli, M, Latini, A, Tosti, A, Rusconi, S, Trezzi, M, D'Avino, A, Grima, P, Mezzaroma, I, Di Biagio, A, Navarra, P, Di Giambenedetto, S; De Luca, A | 2016 |
| Steroid-sparing effects of pentoxifylline in pulmonary sarcoidosis                                                                                                                                                                                                                | Park, , MK, Fontana, null, Babaali, H, Gilbert-McClain, LI, Stylianou, M, Joo, J, Moss, J; Manganiello, VC                                                                                                                                                      | 2009 |
| Controlled Trial of an Internet-Based Risk Reduction Intervention in HIV+ Men Who Have Sex With Men                                                                                                                                                                               | Milam, , J, Jain, S, Daar, E, Dube, M, Seefreid, E, Ellorin, E, Jimenez-Maggiara, G A, Morris, S R; Haubrich, R H                                                                                                                                               | 2014 |
| Oral nutritional supplementation is effective in the maintenance of remission in Crohn's disease                                                                                                                                                                                  | Verma, , S, Kirkwood, B, Brown, S; Gaffner, MH                                                                                                                                                                                                                  | 2000 |
| Chagas Cardiomyopathy Bisoprolol Intervention Study: charity                                                                                                                                                                                                                      | NCT00323973                                                                                                                                                                                                                                                     | 2006 |

|                                                                                                                                                                                                                                 |                                                                                                                                                                                                                                                                                                                                                            |      |
|---------------------------------------------------------------------------------------------------------------------------------------------------------------------------------------------------------------------------------|------------------------------------------------------------------------------------------------------------------------------------------------------------------------------------------------------------------------------------------------------------------------------------------------------------------------------------------------------------|------|
| Randomized Trial of Bicarbonate or Saline Study for the Prevention of Contrast-Induced Nephropathy in Patients with CKD                                                                                                         | Solomon, , R, Gordon, P, Manoukian, SV, Abbott, JD, Kereiakes, DJ, Jeremias, A, Kim, M; Dauerman, HL                                                                                                                                                                                                                                                       | 2015 |
| Pirfenidone in patients with unclassifiable progressive fibrosing interstitial lung disease: demographic and baseline characteristics                                                                                           | Maier, , TM, Corte, TJ, Fischer, A, Kreuter, M, Lederer, DJ, Molina-Molina, M, Samara, K, Axmann, J, Kirchgassler, K; Cottin, V                                                                                                                                                                                                                            | 2018 |
| Efficacy of pre-exercise low-level laser therapy on isokinetic muscle performance in individuals with type 2 diabetes mellitus: study protocol for a randomized controlled trial                                                | Gomes, , CA, Leal-Junior, EC, Biasotto-Gonzalez, DA, El-Hage, Y, Politti, F, Gonzalez Tde, O, Dibai-Filho, AV, de Oliveira, AR, Frigero, M, Antonialli, FC, Vanin, AA; de Tarso Camillo de Carvalho, P                                                                                                                                                     | 2014 |
| Efficacy and safety of mavrilimumab in Japanese subjects with rheumatoid arthritis: findings from a Phase IIa study                                                                                                             | Takeuchi, , T, Tanaka, Y, Close, D, Godwood, A, Wu, CY; Saurigny, D                                                                                                                                                                                                                                                                                        | 2015 |
| Baseline myeloid-derived suppressor cell and eosinophil cell counts predict clinical efficacy in patients with non-small cell lung cancer (NSCLC) treated with nivolumab in second line                                         | Mancuso, , P, Passaro, A, Labanca, V, Gandini, S, Spitaleri, G, Guerini, E, Barberis, M, Noberasco, C, Del Signore, E, Pochesci, A, Catania, C, De Marinis, F; Bertolini, F                                                                                                                                                                                | 2017 |
| Phase II, multicenter, open-label, randomized study of YM155 plus docetaxel as first-line treatment in patients with HER2-negative metastatic breast cancer                                                                     | Clemens, , MR, Gladkov, OA, Gartner, E, Vladimirov, V, Crown, J, Steinberg, J, Jie, F; Keating, A                                                                                                                                                                                                                                                          | 2015 |
| Long-term follow-up of a multicenter, randomized controlled trial of ursodeoxycholic acid in primary sclerosing cholangitis                                                                                                     | Hilscher, , M, Tabibian, JH, Enders, FB, Carey, EJ; Lindor, KD                                                                                                                                                                                                                                                                                             | 2015 |
| The effect of sea buckthorn supplement on oral health, inflammation, and DNA damage in hemodialysis patients: a double-blinded, randomized crossover study                                                                      | Rodhe, , Y, Woodhill, T, Thorman, R, Möller, L; Hylander, B                                                                                                                                                                                                                                                                                                | 2013 |
| Effects of trimetazidine on myocardial perfusion and left ventricular systolic function in type 2 diabetic patients with ischemic cardiomyopathy                                                                                | Belardinelli, , R, Cianci, G, Gigli, M, Mazzanti, M; Lacalaprice, F                                                                                                                                                                                                                                                                                        | 2008 |
| Plasma oxysterols: biomarkers for diagnosis and treatment in spastic paraplegia type 5                                                                                                                                          | Marelli, , C, Lamari, F, Rainteau, D, Lafourcade, A, Banneau, G, Humbert, L, Monin, M-L, Petit, E, Debs, R, Castelnovo, G, Ollagnon, E, Lavie, J, Pilliod, J, Couprie, I, Babin, PJ, Guissart, C, Benyounes, I, Ullmann, U, Lesca, G, Thauvin-Robinet, C, Labauge, P, Odent, S, Ewencyk, C, Wolf, C, Stevanin, G, Hajage, D, Durr, A, Goizet, C; Mochel, F | 2018 |
| Progressive Resistance Exercise Training in CKD: a Feasibility Study                                                                                                                                                            | Watson, , EL, Greening, NJ, Viana, JL, Aulakh, J, Bodicoat, DH, Barratt, J, Feehally, J; Smith, AC                                                                                                                                                                                                                                                         | 2015 |
| Phase I pilot clinical trial of antenatal maternally administered melatonin to decrease the level of oxidative stress in human pregnancies affected by pre-eclampsia (PAMPR): study protocol                                    | Hobson, , SR, Lim, R, Gardiner, EE, Alers, NO; Wallace, EM                                                                                                                                                                                                                                                                                                 | 2013 |
| Deflazacort versus methylprednisolone in polymyalgia rheumatica: clinical equivalence and relative antiinflammatory potency of different treatment regimens                                                                     | Di Munno, , O, Imbimbo, B, Mazzantini, M, Milani, S, Occhipinti, G; Pasero, G                                                                                                                                                                                                                                                                              | 1995 |
| Relation of inflammation and benefit of statins after percutaneous coronary interventions                                                                                                                                       | Chan, , AW, Bhatt, DL, Chew, DP, Reginelli, J, Schneider, JP, Topol, EJ; Ellis, SG                                                                                                                                                                                                                                                                         | 2003 |
| Safety, efficacy, tolerability and pharmacokinetics of azithromycin plus piperazine as a candidate for intermittent preventive treatment for malaria in pregnancy                                                               | Moore, , BR, Benjamin, J, Salman, S, Page-Sharp, M, Laman, M, Batty, KT, Mueller, I, Rogerson, S; Davis, TM                                                                                                                                                                                                                                                | 2018 |
| A randomised double-blind placebo-controlled pilot trial of a combined extract of sage, rosemary and melissa, traditional herbal medicines, on the enhancement of memory in normal healthy subjects, including influence of age | Perry, , NSL, Menzies, R, Hodgson, F, Wedgewood, P, Howes, MR, Brooker, HJ, Wesnes, KA; Perry, EK                                                                                                                                                                                                                                                          | 2018 |
| Inorganic nitrate supplementation enhances functional capacity and lower-limb microvascular reactivity in patients with peripheral artery disease                                                                               | Bock, , JM, Treichler, DP, Norton, SL, Ueda, K, Hughes, WE; Casey, DP                                                                                                                                                                                                                                                                                      | 2018 |
| Full-spectrum light phototherapy for atopic dermatitis                                                                                                                                                                          | Byun, , HJ, Lee, HI, Kim, B, Kim, MN, Hong, H, Choi, Y, Jo, Y, Cho, KH; Mun, SK                                                                                                                                                                                                                                                                            | 2011 |
| Eicosapentaenoic acid (EPA) efficacy for colorectal aberrant crypt foci (ACF): a double-blind randomized controlled trial                                                                                                       | Higurashi, , T, Hosono, K, Endo, H, Takahashi, H, Iida, H, Uchiyama, T, Ezuka, A, Uchiyama, S, Yamada, E, Ohkubo, H, Sakai, E, Maeda, S, Morita, S, Natsumeda, Y, Nagase, H; Nakajima, A                                                                                                                                                                   | 2012 |
| The effect of HLA-DRB1 genes, rheumatoid factor, and treatment on radiographic disease progression in rheumatoid arthritis over 6 years                                                                                         | Rau, , R, Herborn, G, Zueger, S; Fenner, H                                                                                                                                                                                                                                                                                                                 | 2000 |
| Does exercise intensity affect blood pressure and heart rate in obese adolescents? A 6-month multidisciplinary randomized intervention study                                                                                    | Farah, , BQ, Ritti-Dias, RM, Balagopal, PB, Hill, JO; Prado, WL                                                                                                                                                                                                                                                                                            | 2014 |
| Changes in basophil activation during grass-pollen sublingual immunotherapy do not correlate with clinical efficacy                                                                                                             | Van Overtvelt, , L, Baron-Bodo, V, Horiot, S, Moussu, H, Ricarte, C, Horak, F, Zieglmayer, P, Zieglmayer, R, Montagut, A, Galvain, S, De Beaumont, O, Le Gall, M; Moingeon, P                                                                                                                                                                              | 2011 |
| Placebo response in two long-term randomized psoriasis studies that were negative for rosiglitazone                                                                                                                             | Ellis, , CN, Barker, JN, Haig, AE, Parker, CA, Daly, S; Jayawardene, DA                                                                                                                                                                                                                                                                                    | 2007 |
| Decreased oxidative stress in patients with ulcerative colitis supplemented with fish oil omega-3 fatty acids                                                                                                                   | Barbosa, , DS, Cecchini, R, El Kadri, MZ, Rodríguez, MA, Burini, RC; Dichi, I                                                                                                                                                                                                                                                                              | 2003 |
| Physical activity coaching of patients with rheumatoid arthritis in everyday practice: a long-term follow-up                                                                                                                    | Sjöquist, , ES, Brodin, N, Lampa, J, Jensen, I; Opava, CH                                                                                                                                                                                                                                                                                                  | 2011 |
| Effects of sulfurous, salty, bromic, iodine thermal water nasal irrigations in nonallergic chronic rhinosinusitis: a prospective, randomized, double-blind, clinical, and cytological study                                     | Ottaviano, , G, Marioni, G, Staffieri, C, Giacomelli, L, Marchese-Ragona, R, Bertolin, A; Staffieri, A                                                                                                                                                                                                                                                     | 2011 |
| Omega-3 polyunsaturated fatty acid in peripheral arterial disease: effect on lipid pattern, disease severity, inflammation profile, and endothelial function                                                                    | Schiano, , V, Laurenzano, E, Brevetti, G, De Maio, JJ, Lanero, S, Scopacasa, F; Chiariello, M                                                                                                                                                                                                                                                              | 2008 |
| Aggressive hydraTion in patients with ST-Elevation Myocardial infarction undergoing Primary percutaneous coronary intervention to                                                                                               | Liu, , Y, Chen, JY, Huo, Y, Ge, JB, Xian, Y, Duan, CY, Chen, SQ, Jiang, W, Chen, PY; Tan, N                                                                                                                                                                                                                                                                | 2016 |

|                                                                                                                                                                                                                                                  |                                                                                                                                                                                                                                                                                                                                                                                                         |      |
|--------------------------------------------------------------------------------------------------------------------------------------------------------------------------------------------------------------------------------------------------|---------------------------------------------------------------------------------------------------------------------------------------------------------------------------------------------------------------------------------------------------------------------------------------------------------------------------------------------------------------------------------------------------------|------|
| prevenT contrast-induced nephropathy (ATTEMPT): study design and protocol for the randomized, controlled trial, the ATTEMPT, RESCIND 1 (First study for REduction of contraSt-induCed nephropathy followINg carDiac catheterization) trial       |                                                                                                                                                                                                                                                                                                                                                                                                         |      |
| A randomised controlled trial of early insulin therapy in very low birth weight infants, "NIRTURE" (neonatal insulin replacement therapy in Europe)                                                                                              | Beardsall, , K, Vanhaesebrouck, S, Ogilvy-Stuart, AL, Ahluwalia, JS, Vanhole, C, Palmer, C, Midgley, P, Thompson, M, Cornette, L, Weissenbruch, M, Thio, M, de Zegher, F; Dunger, D                                                                                                                                                                                                                     | 2007 |
| Fluvastatin improves arterial stiffness in patients with coronary artery disease and hyperlipidemia: a 5-year follow-up study                                                                                                                    | Hongo, , M, Tsutsui, H, Mawatari, E, Hidaka, H, Kumazaki, S, Yazaki, Y, Takahashi, M, Kinoshita, O; Ikeda, U                                                                                                                                                                                                                                                                                            | 2008 |
| Platelet response to aspirin 50 and 100 mg in patients with coronary heart disease over a five-year period                                                                                                                                       | Berent, , R, Auer, J, Franklin, B, Schmid, P; von Duvillard, SP                                                                                                                                                                                                                                                                                                                                         | 2011 |
| Carnitine supplementation in premature neonates: effect on plasma and red blood cell total carnitine concentrations, nutrition parameters and morbidity                                                                                          | Crill, , CM, Storm, MC, Christensen, ML, Hankins, CT, Bruce Jenkins, M; Helms, RA                                                                                                                                                                                                                                                                                                                       | 2006 |
| A double-blinded, randomized controlled trial of zoledronate therapy for HIV-associated osteopenia and osteoporosis                                                                                                                              | Huang, , J, Meixner, L, Fernandez, S; McCutchan, JA                                                                                                                                                                                                                                                                                                                                                     | 2009 |
| Effect of immune modulation therapy on cardiac function and T-bet/GATA-3 gene expression in aging male patients with chronic cardiac insufficiency                                                                                               | Han, , LN, Guo, SL, Li, TL, Ding, GL, Zhang, YJ; Ma, JL                                                                                                                                                                                                                                                                                                                                                 | 2013 |
| Improvements in seasonal allergic disease with Lactobacillus plantarum No. 14                                                                                                                                                                    | Nagata, , Y, Yoshida, M, Kitazawa, H, Araki, E; Gomyo, T                                                                                                                                                                                                                                                                                                                                                | 2010 |
| Clinical safety evaluation of marine oil derived from Calanus finmarchicus                                                                                                                                                                       | Tande, , KS, Vo, TD; Lynch, BS                                                                                                                                                                                                                                                                                                                                                                          | 2016 |
| First-line pemetrexed plus cisplatin followed by gefitinib maintenance therapy versus gefitinib monotherapy in East Asian patients with locally advanced or metastatic non-squamous non-small cell lung cancer: a randomised, phase 3 trial      | Yang, , JC, Kang, JH, Mok, T, Ahn, MJ, Srimuninnimit, V, Lin, CC, Kim, DW, Tsai, CM, Barraclough, H, Altug, S, Orlando, M; Park, K                                                                                                                                                                                                                                                                      | 2014 |
| Effect of allopurinol on the glomerular filtration rate of children with chronic kidney disease                                                                                                                                                  | Ghane Sharbaf, , F; Assadi, F                                                                                                                                                                                                                                                                                                                                                                           | 2018 |
| Percutaneous cholecystostomy: a definite treatment for the the acalculous and calculous acute cholecystitis in the extreme morbid patients by the well-designed cholecystostomy management protocol                                              | Cha, , BH, Lee, SH, Kim, YN, Jeon, WJ, Lee, SJ, Kim, JD; Lee, HH                                                                                                                                                                                                                                                                                                                                        | 2012 |
| Potassium supplementation and long-term outcomes in chronic peritoneal dialysis patients with end-stage renal disease: a propensity score matching study                                                                                         | Zhang, , Y-F, Wang, Q, Su, Y-Y, Yang, S, Guo, J, Luo, J, Tang, J-M; Li, H-Y                                                                                                                                                                                                                                                                                                                             | 2016 |
| A Randomized Controlled Pilot Study Comparing the Impact of Aprepitant and Fosaprepitant on Chemotherapy Induced Nausea and Vomiting in Patients Treated for Gynecologic Cancer                                                                  | Micha, , JP, Rettenmaier, MA, Brown, JV, Mendivil, A, Abaid, LN, Lopez, KL; Goldstein, BH                                                                                                                                                                                                                                                                                                               | 2016 |
| Clinical and immunological consequences of total glucosides of paeony treatment in Sjögren's syndrome: a randomized controlled pilot trial                                                                                                       | Zhou, , Y, Jin, L, Kong, F, Zhang, H, Fang, X, Chen, Z, Wang, G, Li, X; Li, X                                                                                                                                                                                                                                                                                                                           | 2016 |
| Rifaximin and Norfloxacin for Prevention of SBP in Adults With Decompensated Cirrhosis                                                                                                                                                           | NCT03695705                                                                                                                                                                                                                                                                                                                                                                                             | 2018 |
| Safety and efficacy of adalimumab treatment in Japanese patients with psoriasis: results of SALSA study                                                                                                                                          | Asahina, , A, Torii, H, Ohtsuki, M, Tokimoto, T, Hase, H, Tsuchiya, T, Shinmura, Y, Reyes Servin, O; Nakagawa, H                                                                                                                                                                                                                                                                                        | 2016 |
| Investigation into the efficiency of ultrasound of different intensities in degenerative tendopathy of the shoulder                                                                                                                              | Smolenski, , UC, Jeremies, KJ; Schreiber, TU                                                                                                                                                                                                                                                                                                                                                            | 2001 |
| Ocrelizumab, a humanized anti-CD20 monoclonal antibody, in the treatment of patients with rheumatoid arthritis: a phase I/II randomized, blinded, placebo-controlled, dose-ranging study                                                         | Genovese, , MC, Kaine, JL, Lowenstein, MB, Del Giudice, J, Baldassare, A, Schechtman, J, Fudman, E, Kohen, M, Gujrathi, S, Trapp, RG, Weiss, NJ, Spaniol, G; Dummer, W                                                                                                                                                                                                                                  | 2008 |
| Elevated relapse rate under oral methotrexate versus leflunomide for maintenance of remission in Wegener's granulomatosis                                                                                                                        | Metzler, , C, Miehle, N, Manger, K, Iking-Konert, C, de Groot, K, Hellmich, B, Gross, WL; Reinhold-Keller, E                                                                                                                                                                                                                                                                                            | 2007 |
| GOG-3003: identifying biomarkers predictive of immune and clinical response in a phase 2 RCT of chemo-immunotherapy in recurrent ovarian cancer                                                                                                  | Coukos, , G, Brady, MF, Lankes, HA, Aghajanian, C, Gottardo, R, Swisher, EM, Kandalaf, L, Foukas, PG, Rizack, T, Leach, J, Salani, R, Higgins, R, Hanjani, P, Morgan, M, Edwards, R, Bryan, JK, Manjarez, KL, Mannel, RS, Hershsberg, RM; Monk, BJ                                                                                                                                                      | 2016 |
| Two doses of pamidronate in infants with osteogenesis imperfecta                                                                                                                                                                                 | Senthilnathan, , S, Walker, E; Bishop, NJ                                                                                                                                                                                                                                                                                                                                                               | 2008 |
| Prognostic Value of the Delivery Dialysis Dose on Twice-Weekly Hemodialysis Patients                                                                                                                                                             | Fan, , Q, Yan, Y, Gu, L, He, L, Chen, N, Jiang, G, Yuan, L, Xue, J, Zhang, Y, Ma, J, Jin, H, Yuan, W, Guo, Z, Guo, L, Wang, N, Zhang, W, Ye, Z, Mao, P, Pi, X, Lu, R, Zhu, M, Zhang, W, Ni, Z, Qian, J; Pang, H                                                                                                                                                                                         | 2017 |
| Strategies To OPose Sugars With Non-nutritive Sweeteners Or Water (STOP Sugars NOW) Trial                                                                                                                                                        | NCT03543644                                                                                                                                                                                                                                                                                                                                                                                             | 2018 |
| Higher incidence of secondary AML and adverse molecular markers, together with lower CR and higher AML related death rates in elderly compared to younger patients: results from 2435 patients included in the two german AML intergroup studies | Niederwieser, , D, Hoffmann, VS, Krug, U, Krah, R, Sauerland, C, Spiekermann, K, Bohlander, SK, Hegenbart, U, Poenisch, W, Vucinic, V, Cross, M, Jaekel, N, Pfirrmann, M, Schulze, A, Kraemer, A, Maschmeyer, G, Junghans, C, Scholl, S, Jakob, C, Heinicke, T, Haehling, D, Peter, N, Kreibich, U, Busemann, C, Al-Ali, HK, Elmaagacli, AH, Opitz, B, Wolf, H-H, Hiddemann, W, Berdel, WE; Buechner, T | 2015 |
| A randomized controlled trial of taurolidine heparin versus taurolidine urokinase lock to improve catheter function in hemodialysis                                                                                                              | Mohammad, , Z, Hamad, A, Hamdy, A, Chandra, P, Abdul-Latif, T, Ibrahim, R, Fouda, T; Al-Ali, F                                                                                                                                                                                                                                                                                                          | 2016 |
| Metformin reduces arterial stiffness and improves endothelial function in young women with polycystic ovary syndrome: a randomized, placebo-controlled, crossover trial                                                                          | Agarwal, , N, Rice, SP, Bolusani, H, Luzio, SD, Dunseath, G, Ludgate, M; Rees, DA                                                                                                                                                                                                                                                                                                                       | 2010 |
| Prognostic value of karyotypic analysis in children and adults with high-risk acute lymphoblastic leukemia included in the PETHEMA ALL-93 trial                                                                                                  | Ribera, , JM, Ortega, JJ, Oriol, A, Granada, I, Hernández-Rivas, JM, Parody, R, Bethencourt, C, Rivas, C, Bastida, P, del Potro, E, González-Valentín, ME, Moreno, MJ, Besalduch, J, Fernández-                                                                                                                                                                                                         | 2002 |

|                                                                                                                                                                                                                                                       |                                                                                                                                                                                                                                                                                                                                                                                                                                                                                                                                                                                                                                                                                                                                                                                                                                                                                                                                                                                                                                                                                                                        |      |
|-------------------------------------------------------------------------------------------------------------------------------------------------------------------------------------------------------------------------------------------------------|------------------------------------------------------------------------------------------------------------------------------------------------------------------------------------------------------------------------------------------------------------------------------------------------------------------------------------------------------------------------------------------------------------------------------------------------------------------------------------------------------------------------------------------------------------------------------------------------------------------------------------------------------------------------------------------------------------------------------------------------------------------------------------------------------------------------------------------------------------------------------------------------------------------------------------------------------------------------------------------------------------------------------------------------------------------------------------------------------------------------|------|
|                                                                                                                                                                                                                                                       | Calvo, J, Tormo, M, Arias, J, Molinés, A, Sanz, MA, Maldonado, J, Millá, F, Feliu, E; San Miguel, JF                                                                                                                                                                                                                                                                                                                                                                                                                                                                                                                                                                                                                                                                                                                                                                                                                                                                                                                                                                                                                   |      |
| A Mixture of 3 Bifidobacteria Decreases Abdominal Pain and Improves the Quality of Life in Children with Irritable Bowel Syndrome                                                                                                                     | Giannetti, , E, Maglione, M, Alessandrella, A, Strisciuglio, C, De Giovanni, D, Campanozzi, A, Miele, E; Staiano, A                                                                                                                                                                                                                                                                                                                                                                                                                                                                                                                                                                                                                                                                                                                                                                                                                                                                                                                                                                                                    | 2017 |
| A randomized, placebo-controlled trial of certolizumab pegol (CDP870) for treatment of Crohn's disease                                                                                                                                                | Schreiber, , S, Rutgeerts, P, Fedorak, RN, Khaliq-Kareemi, M, Kamm, MA, Boivin, M, Bernstein, CN, Staun, M, Thomsen, OØ; Innes, A                                                                                                                                                                                                                                                                                                                                                                                                                                                                                                                                                                                                                                                                                                                                                                                                                                                                                                                                                                                      | 2005 |
| Abnormal Ventilatory Response to Carbon Dioxide: a Potential Biomarker for Seizure Induced Respiratory Depression & Modification by SSRI                                                                                                              | NCT02929667                                                                                                                                                                                                                                                                                                                                                                                                                                                                                                                                                                                                                                                                                                                                                                                                                                                                                                                                                                                                                                                                                                            | 2016 |
| Canakinumab for acute gouty arthritis in patients with limited treatment options: results from two randomised, multicentre, active-controlled, double-blind trials and their initial extensions                                                       | Schlesinger, , N, Alten, RE, Bardin, T, Schumacher, HR, Bloch, M, Gimona, A, Krammer, G, Murphy, V, Richard, D; So, AK                                                                                                                                                                                                                                                                                                                                                                                                                                                                                                                                                                                                                                                                                                                                                                                                                                                                                                                                                                                                 | 2012 |
| Natural honey and cardiovascular risk factors; effects on blood glucose, cholesterol, triacylglycerole, CRP, and body weight compared with sucrose                                                                                                    | Yaghoobi, , N, Al-Waili, N, Ghayour-Mobarhan, M, Parizadeh, SM, Abasalt, Z, Yaghoobi, Z, Yaghoobi, F, Esmacili, H, Kazemi-Bajestani, SM, Aghasizadeh, R, Saloom, KY; Ferns, GA                                                                                                                                                                                                                                                                                                                                                                                                                                                                                                                                                                                                                                                                                                                                                                                                                                                                                                                                         | 2008 |
| The ENHANCE trial: analysis and clinical significance                                                                                                                                                                                                 | Padial, LR                                                                                                                                                                                                                                                                                                                                                                                                                                                                                                                                                                                                                                                                                                                                                                                                                                                                                                                                                                                                                                                                                                             | 2010 |
| Ivacaftor in subjects with cystic fibrosis who are homozygous for the F508del-CFTR mutation                                                                                                                                                           | Flume, , PA, Liou, TG, Borowitz, DS, Li, H, Yen, K, Ordoñez, CL; Geller, DE                                                                                                                                                                                                                                                                                                                                                                                                                                                                                                                                                                                                                                                                                                                                                                                                                                                                                                                                                                                                                                            | 2012 |
| Plasma visfatin concentrations after a lifestyle intervention were directly associated with inflammatory markers                                                                                                                                      | Bo, , S, Ciccone, G, Baldi, I, Gambino, R, Mandrile, C, Durazzo, M, Gentile, L, Cassader, M, Cavallo-Perin, P; Pagano, G                                                                                                                                                                                                                                                                                                                                                                                                                                                                                                                                                                                                                                                                                                                                                                                                                                                                                                                                                                                               | 2009 |
| Effect of renin-angiotensin-aldosterone system inhibition, dietary sodium restriction, and/or diuretics on urinary kidney injury molecule 1 excretion in nondiabetic proteinuric kidney disease: a post hoc analysis of a randomized controlled trial | Waanders, , F, Vaidya, VS, van Goor, H, Leuvenink, H, Damman, K, Hamming, I, Bonventre, JV, Vogt, L; Navis, G                                                                                                                                                                                                                                                                                                                                                                                                                                                                                                                                                                                                                                                                                                                                                                                                                                                                                                                                                                                                          | 2009 |
| Alendronate is more effective than etidronate for increasing bone mass in osteopenic patients with primary biliary cirrhosis                                                                                                                          | Guañabens, , N, Parés, A, Ros, I, Alvarez, L, Pons, F, Caballería, L, Monegal, A, Martínez de Osaba, MJ, Roca, M, Peris, P; Rodés, J                                                                                                                                                                                                                                                                                                                                                                                                                                                                                                                                                                                                                                                                                                                                                                                                                                                                                                                                                                                   | 2003 |
| Long-term follow-up of a randomized trial on 118 patients with polyarteritis nodosa or microscopic polyangiitis without poor-prognosis factors                                                                                                        | Samson, , M, Puechal, X, Devilliers, H, Ribí, C, Cohen, P, Bienvenu, B, Ruivard, M, Terrier, B, Pagnoux, C, Mouthon, L, Guillevin, L, Alcalay, M, Arnal, C, Battesti, J-P, Bernardeau, C, Boullanger, N, Sao, AB, Buzon, J-J, Cabane, J, Cacoub, P, Cantagrel, A, Cevallos, R, Charbonneau, J, Costedoat, N, Creange, A, Dadonien, J, de Faucal, P, Defuentes, G, de Seze, J, Delaunay, C, Dubertret, L, Dubois, A, Duhamel, E, Neau, D, Esteve, E, Fior, R, Foullon, P, Gaida, T, Galperine, T, Garcin, J-M, Gil, H, Gilson, B, Girard, T, Godeau, B, Godmer, P, Gueit, I, Hamidou, M, Labussiere, AS, Landron, C, Lanoux, P, Le Berruyer, P-Y, Lhote, F, Lidove, O, Loustaud-Ratti, V, Maillard, H, Mejjad, O, Miossec, P, Paris, J-F, Penalba, C, Pertuiset, E, Philippe, J-M, Ponge, T, Quere, I, Randrianjohany, A, Rankin, E, Saraux, J-L, Schaeffer, A, Schmidt, C, Schneebeli, S, Seigneure, C, Smail, A, Sparsa, A, Stirnemann, J, Swiader, L, Taillandier, J-P, Thevenot, C, Tiev, K-P, Toledano, C, Velmans, N, Viallard, J-F, Vidal, E, Wahl, D, Wattiaux, M-J, Witte, A, Ziza, J-M, Zoulim, A; Bergere, A | 2014 |
| Nutraceutical Effects on Glucose and Lipid Metabolism in Patients with Impaired Fasting Glucose: a Pilot, Double-Blind, Placebo-Controlled, Randomized Clinical Trial on a Combined Product                                                           | Cicero, , AFG, Fogacci, F, Morbini, M, Colletti, A, Bove, M, Veronesi, M, Giovannini, M; Borghi, C                                                                                                                                                                                                                                                                                                                                                                                                                                                                                                                                                                                                                                                                                                                                                                                                                                                                                                                                                                                                                     | 2017 |
| PIRATE project: point-of-care, informatics-based randomised controlled trial for decreasing overuse of antibiotic therapy in Gram-negative bacteraemia                                                                                                | Huttner, , A, Albrich, WC, Bochud, P-Y, Gayet-Ageron, A, Rossel, A, Von Dach, E, Harbarth, S; Kaiser, L                                                                                                                                                                                                                                                                                                                                                                                                                                                                                                                                                                                                                                                                                                                                                                                                                                                                                                                                                                                                                | 2017 |
| Cobimetinib (C) + paclitaxel (P) as first-line treatment in patients (pts) with advanced triple-negative breast cancer (TNBC): updated results and biomarker data from the phase 2 COLET study                                                        | Brufsky, , A, Kim, S-B, Velu, TJ, Saenz, JAG, Tan-Chiu, E, Sohn, J, Dirix, LY, Vanasek, J, Borms, MV, Mingorance, JID, Liu, M-C, Moezi, MM, Kozloff, M, Sparano, JA, Hsu, JJ, Wongchenko, M, Simmons, BP, McNally, VA; Miles, D                                                                                                                                                                                                                                                                                                                                                                                                                                                                                                                                                                                                                                                                                                                                                                                                                                                                                        | 2016 |
| Neurostimulation for abdominal pain-related functional gastrointestinal disorders in adolescents: a randomised, double-blind, sham-controlled trial                                                                                                   | Kovacic, , K, Hainsworth, K, Sood, M, Chelimsky, G, Unteutsch, R, Nugent, M, Simpson, P; Miranda, A                                                                                                                                                                                                                                                                                                                                                                                                                                                                                                                                                                                                                                                                                                                                                                                                                                                                                                                                                                                                                    | 2017 |
| 6-mercaptopurine or methotrexate added to prednisone induces and maintains remission in steroid-dependent inflammatory bowel disease                                                                                                                  | Maté-Jiménez, , J, Hermida, C, Cantero-Perona, J; Moreno-Otero, R                                                                                                                                                                                                                                                                                                                                                                                                                                                                                                                                                                                                                                                                                                                                                                                                                                                                                                                                                                                                                                                      | 2000 |
| Effect of butyrylcholinesterase genotype on the response to rivastigmine or donepezil in younger patients with Alzheimer's disease                                                                                                                    | Blesa, , R, Bullock, R, He, Y, Bergman, H, Gambina, G, Meyer, J, Rapatz, G, Nagel, J; Lane, R                                                                                                                                                                                                                                                                                                                                                                                                                                                                                                                                                                                                                                                                                                                                                                                                                                                                                                                                                                                                                          | 2006 |
| Association of baseline C-reactive protein levels with periprocedural myocardial injury in patients undergoing percutaneous bifurcation intervention: a CACTUS study subanalysis                                                                      | Niccoli, , G, Sgueglia, GA, Latib, A, Crea, F; Colombo, A                                                                                                                                                                                                                                                                                                                                                                                                                                                                                                                                                                                                                                                                                                                                                                                                                                                                                                                                                                                                                                                              | 2014 |
| Effects of alpha-lipoic acid supplementation in peripheral arterial disease: a pilot study                                                                                                                                                            | Vincent, , HK, Bourguignon, CM, Vincent, KR; Taylor, AG                                                                                                                                                                                                                                                                                                                                                                                                                                                                                                                                                                                                                                                                                                                                                                                                                                                                                                                                                                                                                                                                | 2007 |
| Pmlasma neurofilament heavy chain levels correlate with disease severity and progression on multiple clinical outcomes in amyotrophic lateral sclerosis (ALS)                                                                                         | Han, , S, Liu, D, Ciotti, S, Ferguson, T, Ray, S; Johns, D                                                                                                                                                                                                                                                                                                                                                                                                                                                                                                                                                                                                                                                                                                                                                                                                                                                                                                                                                                                                                                                             | 2017 |
| L/N-type calcium channel blocker cilnidipine added to renin-angiotensin inhibition improves ambulatory blood pressure profile and suppresses cardiac hypertrophy in hypertension with chronic kidney disease                                          | Kanaoka, , T, Tamura, K, Wakui, H, Ohsawa, M, Azushima, K, Uneda, K, Kobayashi, R, Fujikawa, T, Tsurumi-Ikeya, Y, Maeda, A, Yanagi, M, Toya, Y; Umemura, S                                                                                                                                                                                                                                                                                                                                                                                                                                                                                                                                                                                                                                                                                                                                                                                                                                                                                                                                                             | 2013 |
| Time course and dose response of alpha tocopherol on oxidative stress in haemodialysis patients                                                                                                                                                       | Reed, , A, Cho, YJ, Coombes, JS; Fassett, RG                                                                                                                                                                                                                                                                                                                                                                                                                                                                                                                                                                                                                                                                                                                                                                                                                                                                                                                                                                                                                                                                           | 2009 |
| C-reactive protein, an early marker of community-acquired sepsis resolution: a multi-center prospective observational study                                                                                                                           | Povoa, , P, Teixeira-Pinto, AM; Carneiro, AH                                                                                                                                                                                                                                                                                                                                                                                                                                                                                                                                                                                                                                                                                                                                                                                                                                                                                                                                                                                                                                                                           | 2011 |

|                                                                                                                                                                                                                                                                                                                                              |                                                                                                                                                                         |      |
|----------------------------------------------------------------------------------------------------------------------------------------------------------------------------------------------------------------------------------------------------------------------------------------------------------------------------------------------|-------------------------------------------------------------------------------------------------------------------------------------------------------------------------|------|
| Results of a two-year followup study of patients with rheumatoid arthritis who received a combination of abatacept and methotrexate                                                                                                                                                                                                          | Kremer, , JM, Genant, HK, Moreland, LW, Russell, AS, Emery, P, Abud-Mendoza, C, Szechiński, J, Li, T, Teng, J, Becker, JC; Westhovens, R                                | 2008 |
| The medical management of metastatic renal cell carcinoma: integrating new guidelines and recommendations                                                                                                                                                                                                                                    | Bellmunt, , J; Guix, M                                                                                                                                                  | 2009 |
| Therapeutic angiogenesis for patients with limb ischaemia by autologous transplantation of bone-marrow cells: a pilot study and a randomised controlled trial                                                                                                                                                                                | Tateishi-Yuyama, , E, Matsubara, H, Murohara, T, Ikeda, U, Shintani, S, Masaki, H, Amano, K, Kishimoto, Y, Yoshimoto, K, Akashi, H, Shimada, K, Iwasaka, T; Imaizumi, T | 2002 |
| Effects of telmisartan and losartan on cardiovascular protection in Japanese hypertensive patients                                                                                                                                                                                                                                           | Hasegawa, , H, Takano, H, Narumi, H, Ohtsuka, M, Mizuguchi, T, Namiki, T, Kobayashi, Y; Komuro, I                                                                       | 2011 |
| Individualizing Incentives for Alcohol in the Severely Mentally Ill                                                                                                                                                                                                                                                                          | NCT03481049                                                                                                                                                             | 2018 |
| De-escalation of tyrosine kinase inhibitor dose in patients with chronic myeloid leukaemia with stable major molecular response (DESTINY): an interim analysis of a non-randomised, phase 2 trial                                                                                                                                            | Clark, , RE, Polydoros, F, Apperley, JF, Milojkovic, D, Pocock, C, Smith, G, Byrne, JL, de Lavallade, H, O'Brien, SG, Coffey, T, Foroni, L; Copland, M                  | 2017 |
| Effect of Vitamin D3 Supplementation on Cardiometabolic Risk                                                                                                                                                                                                                                                                                 | NCT02359214                                                                                                                                                             | 2015 |
| Ulcerative Colitis Relapse Prevention by Prebiotics                                                                                                                                                                                                                                                                                          | NCT02865707                                                                                                                                                             | 2016 |
| C-reactive protein as a cardiovascular risk factor and its therapeutic implications in end-stage renal disease patients                                                                                                                                                                                                                      | Park, , JS; Kim, SB                                                                                                                                                     | 2003 |
| Randomized comparison of the effects of rosiglitazone vs. placebo on peak integrated cardiovascular performance, cardiac structure, and function                                                                                                                                                                                             | McGuire, , DK, Abdullah, SM, See, R, Snell, PG, McGavock, J, Szczepaniak, LS, Ayers, CR, Drazner, MH, Khera, A; de Lemos, JA                                            | 2010 |
| Beneficial Effects of Quercetin in Chronic Obstructive Pulmonary Disease (COPD)                                                                                                                                                                                                                                                              | NCT01708278                                                                                                                                                             | 2012 |
| Comparison of clinical characteristics and treatment outcomes between eosinophilic and neutrophilic exacerbations of COPD requiring hospital admission                                                                                                                                                                                       | Kang, , HS, Jeon, SH, Rhee, CK, Lee, SH; Kim, YH                                                                                                                        | 2016 |
| A study to look at the efficacy and safety of ALN TTRSC in patients with an inherited condition that causes certain protein molecules to deposit in the heart                                                                                                                                                                                | EUCTR2014-003835-20-ES                                                                                                                                                  | 2015 |
| Phase 3 Study of Nivolumab or Nivolumab plus Ipilimumab Versus Ipilimumab Alone in Previously Untreated Advanced Melanoma                                                                                                                                                                                                                    | EUCTR2012-005371-13-ES                                                                                                                                                  | 2013 |
| The Effects of Tai Chi on Markers of Atherosclerosis, Lower-limb Physical Function, and Cognitive Ability in Adults Aged Over 60: a Randomized Controlled Trial                                                                                                                                                                              | Zhou, , S, Zhang, Y, Kong, Z, Loprinzi, PD, Hu, Y, Ye, J, Liu, S, Yu, JJ; Zou, L                                                                                        | 2019 |
| Assessment of blood concentration of an enzyme named Active Thrombin-Activatable Fibrinolysis Inhibitor (TAFIa) in Patients at acute stage of Stroke                                                                                                                                                                                         | EUCTR2017-002760-41-ES                                                                                                                                                  | 2017 |
| Alternate day fasting for obesity treatment                                                                                                                                                                                                                                                                                                  | ISRCTN13374800                                                                                                                                                          | 2017 |
| Effect of Vitamin C on Stress in Peritoneal Dialysis Patients                                                                                                                                                                                                                                                                                | IRCT2016050227675N2                                                                                                                                                     | 2017 |
| A Phase 3 Study of Guselkumab in Subjects with Active Psoriatic Arthritis                                                                                                                                                                                                                                                                    | EUCTR2016-001163-37-PL                                                                                                                                                  | 2017 |
| Tai Chi for stress and cardiovascular function                                                                                                                                                                                                                                                                                               | ACTRN12616001204437                                                                                                                                                     | 2016 |
| Nexavar in Relapsed Peripheral T-cell Non-Hodgkins Lymphoma - NEXT                                                                                                                                                                                                                                                                           | EUCTR2008-000306-36-SE                                                                                                                                                  | 2008 |
| A Multicenter, Randomized, Parallel-Groups, Double-Blind Placebo Controlled Study Comparing The Efficacy, Safety, And Tolerability Of Administration Of Ezetimibe/Simvastatin tablet 10/20 Mg Versus Doubling the Dose of Simvastatin 20 mg Simvastatin 40 mg In Subjects With Primary Hypercholesterolemia And Coronary Heart Disease - ND  | EUCTR2005-004848-31-IT                                                                                                                                                  | 2006 |
| A study to primarily determine how safe and tolerable the study treatment, PTG-200 is in comparison to a matching placebo, when taken by healthy participants as a single dose or multiple dose treatment                                                                                                                                    | ACTRN12617001426370                                                                                                                                                     | 2017 |
| Liraglutide Kidney: a study investigating the short-term impact of liraglutide on kidney function in diabetic patients                                                                                                                                                                                                                       | EUCTR2012-003577-26-DK                                                                                                                                                  | 2012 |
| PHASE III, RANDOMISED, DOUBLE BLIND, STRATIFIED COMPARATIVE, PLACEBO CONTROLLED, PARALLEL GROUP, MULTICENTRE STUDY TO ASSESS THE EFFECT OF DEEP SUBCUTANEOUS INJECTIONS OF LANREOTIDE AUTOGEL 120 MG ADMINISTERED EVERY 28 DAYS ON TUMOUR PROGRESSION FREE SURVIVAL IN PATIENTS WITH NON FUNCTIONING ENTERO-PANCREATIC ENDOCRINE TUMOUR - ND | EUCTR2005-004904-35-IT                                                                                                                                                  | 2007 |
| Electrical stimulation in cirrhotic in peripheral muscle strength and exercise capacity                                                                                                                                                                                                                                                      | RBR-3sst2s                                                                                                                                                              | 2017 |
| Evaluation of muscle strength, exercise capacity, heart rate and blood inflammatory of patients with chronic obstructive pulmonary disease submitted to physical exercises                                                                                                                                                                   | RBR-7kcr2p                                                                                                                                                              | 2016 |
| Effect of Quercetin supplementation on women with Polycystic ovary syndrome                                                                                                                                                                                                                                                                  | IRCT2016082215536N4                                                                                                                                                     | 2017 |
| The role of mindfulness in promoting wellbeing in patients with Crohn's disease: an exploratory randomised control trial                                                                                                                                                                                                                     | ACTRN12618002009291                                                                                                                                                     | 2018 |
| Shen-Shuai-Ning granule decreased serum concentrations of indoxyl sulphate in uremic patients undergoing peritoneal dialysis                                                                                                                                                                                                                 | Chen, , X, Gao, S, Ruan, M, Chen, S, Xu, J, Xing, X, Pan, X, Mei, C; Mao, Z                                                                                             | 2018 |

|                                                                                                                                                                                                                                                                                                                                                                                                                                                                          |                                                                                                                                                                 |      |
|--------------------------------------------------------------------------------------------------------------------------------------------------------------------------------------------------------------------------------------------------------------------------------------------------------------------------------------------------------------------------------------------------------------------------------------------------------------------------|-----------------------------------------------------------------------------------------------------------------------------------------------------------------|------|
| A Phase 3 Study of Guselkumab in Subjects with Active Psoriatic Arthritis                                                                                                                                                                                                                                                                                                                                                                                                | EUCTR2016-001224-63-CZ                                                                                                                                          | 2017 |
| Prevention and treatment of intestinal bacterial translocation in patients with dycompensated cirrhosis by Tongfu method and its mechanism                                                                                                                                                                                                                                                                                                                               | ChiCTR1800018280                                                                                                                                                | 2018 |
| The effect of Saffron supplement on active rheumatoid arthritis                                                                                                                                                                                                                                                                                                                                                                                                          | IRCT201707139472N14                                                                                                                                             | 2017 |
| A Phase 3 Study of Guselkumab in Subjects with Active Psoriatic Arthritis                                                                                                                                                                                                                                                                                                                                                                                                | EUCTR2016-001224-63-PL                                                                                                                                          | 2017 |
| A Phase III, randomized, double-blind, placebo-controlled study to assess the efficacy and safety of LEBRIKIZUMAB in patients with uncontrolled asthma who are on inhaled corticosteroids and second controller medication                                                                                                                                                                                                                                               | EUCTR2011-004205-24-ES                                                                                                                                          | 2012 |
| Bioavailability study of Fentanyl Citrate                                                                                                                                                                                                                                                                                                                                                                                                                                | CTRI/2014/10/005091                                                                                                                                             | 2014 |
| Efficacy and Safety Study of Guselkumab in the Treatment of Participants With Active Psoriatic Arthritis (PsA)                                                                                                                                                                                                                                                                                                                                                           | EUCTR2014-003697-17-RO                                                                                                                                          | 2015 |
| Atorvastatin vs Colchicine in Decrease of Troponin I of High Sensitivity in Patients With Rheumatoid Arthritis                                                                                                                                                                                                                                                                                                                                                           | NCT04056039                                                                                                                                                     | 2019 |
| A trial to compare Z102 against Prednisone in patients with rheumatoid arthritis                                                                                                                                                                                                                                                                                                                                                                                         | EUCTR2011-002392-41-BG                                                                                                                                          | 2012 |
| A clinical study of Pembrolizumab plus axitinib vs. sunitinib in advanced kidney cancer                                                                                                                                                                                                                                                                                                                                                                                  | EUCTR2016-000588-17-FR                                                                                                                                          | 2016 |
| A Phase IIb Multicentric Controlled Study Evaluating the Therapeutic Vaccine TG4010 (MVA-MUC1-IL2) as an Adjunct to Standard Chemotherapy in Advanced Non Small Cell Lung Cancer                                                                                                                                                                                                                                                                                         | EUCTR2005-001015-22-HU                                                                                                                                          | 2005 |
| dark chocolate effect on cardiovascular side effect of diabetes                                                                                                                                                                                                                                                                                                                                                                                                          | IRCT2015022116123N5                                                                                                                                             | 2015 |
| A Clinical Trial to Look at the Effects of the Drug Bempedoic Acid when adding it to Ezetimibe Therapy in Patients with High Cholesterol. Patients to be randomly allocated to either placebo or investigational drug; assignment will be unknown to patient and doctor                                                                                                                                                                                                  | EUCTR2016-004084-39-HU                                                                                                                                          | 2017 |
| A Dose-Ranging Study of the Effects of SCH 527123 in Subjects With Moderate to Severe COPD                                                                                                                                                                                                                                                                                                                                                                               | EUCTR2008-003780-38-FR                                                                                                                                          | 2009 |
| Use of standard enteral formula versus enteric formula with prebiotic content in nutrition therapy: a randomized controlled study among neuro-critical care patients                                                                                                                                                                                                                                                                                                     | Tuncay, , P, Arpacı, F, Doganay, M, Erdem, D, Sahna, A, Ergun, H; Atabey, D                                                                                     | 2018 |
| A phase 2, multi-centre, randomised, double blind, placebo controlled study evaluating the efficacy, safety and pharmacokinetics of two doses of a candidate Disease Modifying Anti-Rheumatic Drug (DMARD), (SMP-114 120 mg and 240 mg once daily), administered in combination with ongoing methotrexate treatment in patients with active rheumatoid arthritis. - ASPECTS- Assessment of Safety, Pharmacokinetics and Efficacy in a Combination Treatment with SMP-114 | EUCTR2005-003436-21-CZ                                                                                                                                          | 2005 |
| Early statin therapy restores endothelial function in children with familial hypercholesterolemia                                                                                                                                                                                                                                                                                                                                                                        | de Jongh, , S, Lilien, MR, op't Roodt, J, Stroes, ES, Bakker, HD; Kastelein, JJ                                                                                 | 2002 |
| Identification of specifically reduced Th2 cell subsets in allergic rhinitis patients after sublingual immunotherapy                                                                                                                                                                                                                                                                                                                                                     | Ihara, , F, Sakurai, D, Yonekura, S, Iinuma, T, Yagi, R, Sakurai, T, Ito, T, Matsuura, A, Morimoto, Y, Arai, T, Suzuki, S, Katayama, K, Nakayama, T; Okamoto, Y | 2018 |
| Effect of atorvastatin on apolipoprotein B48 metabolism and low-density lipoprotein receptor activity in normolipidemic patients with coronary artery disease                                                                                                                                                                                                                                                                                                            | Dane-Stewart, , CA, Watts, GF, Pal, S, Chan, D, Thompson, P, Hung, J; Mamo, JC                                                                                  | 2003 |
| Determination of the efficacious and safe dose of ivabradine in paediatric patients with dilated cardiomyopathy and symptomatic chronic heart failure aged from 6 months to less than 18 years                                                                                                                                                                                                                                                                           | EUCTR2011-001292-39-ES                                                                                                                                          | 2012 |
| Fast Track to Health. The effect of a modified alternate day fasting dietary pattern on weight loss and well-being among young people above a healthy weight                                                                                                                                                                                                                                                                                                             | ACTRN12617001630303                                                                                                                                             | 2017 |
| Clinical randomized double-blind placebo-controlled study of Bifidobacterium Lactobacillus M8 in the treatment of ankylosing spondylitis                                                                                                                                                                                                                                                                                                                                 | ChiCTR1800017111                                                                                                                                                | 2018 |
| A Study Comparing SAI101 to MabThera® or Rituxan® in Patients with Rheumatoid Arthritis (RA)                                                                                                                                                                                                                                                                                                                                                                             | EUCTR2014-005368-13-CZ                                                                                                                                          | 2016 |
| Comparing cultured limbal stem cell transplantation (CLET) with direct limbal lenticule transplantation (SLET) in eyes with total limbal stem cell deficiency due to ocular burns                                                                                                                                                                                                                                                                                        | ISRCTN12217540                                                                                                                                                  | 2018 |
| Oral treatment of allergy with a non-pathogenic microorganism: a randomised clinical trial                                                                                                                                                                                                                                                                                                                                                                               | JPRN-UMIN000001070                                                                                                                                              | 2008 |
| A study to check how safe, beneficial and tolerable the drug canakinumab is for patients with SJIA                                                                                                                                                                                                                                                                                                                                                                       | EUCTR2008-005476-27-Outside-EU/EEA                                                                                                                              | 2012 |
| An Open-Label, Multicenter, Randomized, Phase Ib/II Study of E7080 in Combination with Carboplatin + Gemcitabine versus Carboplatin + Gemcitabine Alone as Second Line Therapy in Patients with Platinum-Sensitive Recurrent Ovarian Cancer by CA125                                                                                                                                                                                                                     | EUCTR2009-016050-41-PL                                                                                                                                          | 2010 |
| A Phase III, randomized, double-blind, placebo-controlled study to assess the efficacy and safety of LEBRIKIZUMAB in patients with uncontrolled asthma who are on inhaled corticosteroids and second controller medication                                                                                                                                                                                                                                               | EUCTR2011-004218-41-ES                                                                                                                                          | 2012 |
| Itolizumab for Moderate-to-Severe Psoriasis-phase 3                                                                                                                                                                                                                                                                                                                                                                                                                      | RPCEC00000201                                                                                                                                                   | 2015 |

|                                                                                                                                                                                                                                                                                                                                                                                                                                                                                                                                                                                                                  |                                                                                                                                                                                                                                                |      |
|------------------------------------------------------------------------------------------------------------------------------------------------------------------------------------------------------------------------------------------------------------------------------------------------------------------------------------------------------------------------------------------------------------------------------------------------------------------------------------------------------------------------------------------------------------------------------------------------------------------|------------------------------------------------------------------------------------------------------------------------------------------------------------------------------------------------------------------------------------------------|------|
| Efficacy and Safety Study in Mild Asthmatic Subjects Undergoing Allergen Challenge                                                                                                                                                                                                                                                                                                                                                                                                                                                                                                                               | EUCTR2012-001729-28-DE                                                                                                                                                                                                                         | 2012 |
| A Phase 3 Study of Guselkumab in Subjects with Active Psoriatic Arthritis                                                                                                                                                                                                                                                                                                                                                                                                                                                                                                                                        | EUCTR2016-001163-37-HU                                                                                                                                                                                                                         | 2017 |
| Randomized, multicenter cross-over study investigating the effect of bicarbonate-based solutions (Physioneal 35 vs. 40) on protein metabolism in children and adolescents on chronic peritoneal dialysis - Nephropaed-PD-01                                                                                                                                                                                                                                                                                                                                                                                      | EUCTR2005-005434-12-DE                                                                                                                                                                                                                         | 2008 |
| BAX 326 (recombinant Factor IX): a Phase 1/3 Prospective, Controlled, Multicenter Study Evaluating Pharmacokinetics, Efficacy, Safety, and Immunogenicity in Previously Treated Patients with Severe (FIX level < 1%) or Moderately Severe (FIX level = 2%) Hemophilia B - BAX 326 pivotal                                                                                                                                                                                                                                                                                                                       | EUCTR2009-016720-31-BG                                                                                                                                                                                                                         | 2010 |
| Ajuste del tratamiento con tirofiban en pacientes que presentan resistencia a la aspirina o al clopidogrel: 3T/2R Tailoring Treatment with Tirofiban in patients showing Resistance to aspirin and/or Resistance to clopidogrel: 3T/2R - 3T/2R                                                                                                                                                                                                                                                                                                                                                                   | EUCTR2007-002427-32-ES                                                                                                                                                                                                                         | 2008 |
| A randomized, blinded study, using multiple increasing doses of RO5310074, studying the effects of RO5310074 in patients with psoriatic arthritis                                                                                                                                                                                                                                                                                                                                                                                                                                                                | ACTRN12610000694011                                                                                                                                                                                                                            | 2010 |
| Phase IIa study to evaluate the safety, blood concentration and effect on the body of repeated administrations of PRS-080#022-DP to patients with chronic kidney disease undergoing dialysis and suffering from decreased amount of red blood cells                                                                                                                                                                                                                                                                                                                                                              | EUCTR2016-004472-21-CZ                                                                                                                                                                                                                         | 2017 |
| A Randomized, Double-Blind, Multi-center, Phase II Fixed Dose Study of Multiple Doses of Ipilimumab (MDX-010) Monotherapy in Patients with Previously Treated Unresectable Stage III or IV Melanoma Revised Protocol 2, incorporating Amendments 2 and 7 - version 5.0, dated 28-Sep-07 + Protocol Amendment 01-Pharmacogenetics Blood Sample; + Protocol Amendment 03-Pharmacogenomics Tissue Sample; + Protocol Amendment 04-Pharmacogenomic Biomarker Sample. + Amendment 5 Country Specific - Germany - version 1.0, dated 04-Apr-06 + Amendment 6 Country Specific - Germany - version 1.0, dated 11-Aug-06 | EUCTR2005-003265-16-DE                                                                                                                                                                                                                         | 2006 |
| A RANDOMIZED, CONTROLLED, DOUBLE-BLIND, PARALLEL-GROUP, PHASE 3 STUDY TO COMPARE THE PHARMACOKINETICS, EFFICACY AND SAFETY BETWEEN CT-P10, RITUXAN AND MABTHERA IN PATIENTS WITH RHEUMATOID ARTHRITIS                                                                                                                                                                                                                                                                                                                                                                                                            | PER-022-14                                                                                                                                                                                                                                     | 2014 |
| Efficacy and Safety of REGN727/SAR236553 in patients with primary hypercholesterolemia who are intolerant to statins                                                                                                                                                                                                                                                                                                                                                                                                                                                                                             | EUCTR2012-001221-27-GB                                                                                                                                                                                                                         | 2013 |
| No effects of probiotics on atopic dermatitis in infancy: a randomized placebo-controlled trial                                                                                                                                                                                                                                                                                                                                                                                                                                                                                                                  | Brouwer, , ML, Wolt-Plompen, SA, Dubois, AE, van der Heide, S, Jansen, DF, Hoiyer, MA, Kauffman, HF; Duiveman, EJ                                                                                                                              | 2006 |
| Comparison of the effects of combination atorvastatin (40 mg) + ezetimibe (10 mg) versus atorvastatin (40 mg) alone on secretory phospholipase A2 activity in patients with stable coronary artery disease or coronary artery disease equivalent                                                                                                                                                                                                                                                                                                                                                                 | Azar, , M, Valentin, E, Badaoui, G, Kassab, R, Sarkis, A; Azar, RR                                                                                                                                                                             | 2011 |
| Design of FLAT-SUGAR: randomized trial of prandial insulin versus prandial glp-1 receptor agonist together with basal insulin and metformin for high-risk type 2 diabetes                                                                                                                                                                                                                                                                                                                                                                                                                                        | Probstfield, JL                                                                                                                                                                                                                                | 2015 |
| Effect of metformin treatment on intrafollicular cytokines, ovarian response to gonadotropin and in vitro fertilization outcome in patients with polycystic ovary syndrome                                                                                                                                                                                                                                                                                                                                                                                                                                       | Kim, , C, Jeung, Y, Moon, J; Kang, B                                                                                                                                                                                                           | 2016 |
| Final results of a phase 2 trial of extended treatment (TX) with Carfilzomib (CFZ), Lenalidomide (LEN), and Dexamethasone (KRd) plus autologous stem cell transplantation (ASCT) in newly diagnosed multiple myeloma (NDMM)                                                                                                                                                                                                                                                                                                                                                                                      | Zimmerman, , T, Raje, NS, Vij, R, Reece, D, Berdeja, JG, Stephens, LA, McDonnell, K, Rosenbaum, CA, Jasielec, J, Richardson, PG, Gurbuxani, S, Nam, J, Sevenson, E, Wolfe, BD, Rosebeck, S, Stefka, A, Dytfield, D, Griffith, K; Jakubowiak, A | 2016 |
| Evaluation of low-dose rituximab for the retreatment of patients with active rheumatoid arthritis: a non-inferiority randomised controlled trial                                                                                                                                                                                                                                                                                                                                                                                                                                                                 | Mariette, , X, Rouanet, S, Sibilia, J, Combe, B, Le Loët, X, Tebib, J, Jourdan, R; Dougados, M                                                                                                                                                 | 2014 |
| Improvements in the systolic and pulse pressure components of blood pressure, in arterial stiffness and in left ventricular hypertrophy in hypertensive patients treated with the perindopril/indapamide combination: the REASON study                                                                                                                                                                                                                                                                                                                                                                           | Blacher, , J; Safar, M                                                                                                                                                                                                                         | 2004 |
| Clinical trial: preliminary efficacy and safety study of a new Budesonide-MMX® 9 mg extended-release tablets in patients with active left-sided ulcerative colitis                                                                                                                                                                                                                                                                                                                                                                                                                                               | D'Haens, , GR, Kovács, A, Vergauwe, P, Nagy, F, Molnár, T, Bouhnik, Y, Weiss, W, Brunner, H, Laverigne-Slove, A, Binelli, D, Di Stefano, AF; Marteau, P                                                                                        | 2010 |
| Lowered platelet count as a prognostic factor in pregnancy induced hypertension - A prospective study                                                                                                                                                                                                                                                                                                                                                                                                                                                                                                            | Kamatar, , SC, Rajesh, BP; Raju, VS                                                                                                                                                                                                            | 2015 |
| Peritonitis outcomes in patients with HIV and end-stage renal failure on peritoneal dialysis: a prospective cohort study                                                                                                                                                                                                                                                                                                                                                                                                                                                                                         | Ndlovu, , KCZ, Sibanda, W; Assounga, A                                                                                                                                                                                                         | 2017 |
| Comorbidities, alone and in combination with D-dimer, as risk factors for recurrence after a first episode of unprovoked venous thromboembolism in the extended follow-up of the PROLONG study                                                                                                                                                                                                                                                                                                                                                                                                                   | Cosmi, , B, Legnani, C, Tosetto, A, Pengo, V, Ghirarduzzi, A, Testa, S, Prisco, D, Poli, D, Tripodi, A; Palareti, G                                                                                                                            | 2010 |
| Efficacy and safety of infliximab in patients with ankylosing spondylitis: results of a randomized, placebo-controlled trial (ASSERT)                                                                                                                                                                                                                                                                                                                                                                                                                                                                            | van der Heijde, , D, Dijkmans, B, Geusens, P, Sieper, J, DeWoody, K, Williamson, P; Braun, J                                                                                                                                                   | 2005 |
| Fulvestrant plus palbociclib versus fulvestrant plus placebo for treatment of hormone-receptor-positive, HER2-negative metastatic breast cancer that progressed on previous endocrine therapy (PALOMA-3): final                                                                                                                                                                                                                                                                                                                                                                                                  | Cristofanilli, , M, Turner, NC, Bondarenko, I, Ro, J, Im, SA, Masuda, N, Colleoni, M, DeMichele, A, Loi, S, Verma, S, Iwata,                                                                                                                   | 2016 |

|                                                                                                                                                                                                  |                                                                                                                                                                                                                                                                            |      |
|--------------------------------------------------------------------------------------------------------------------------------------------------------------------------------------------------|----------------------------------------------------------------------------------------------------------------------------------------------------------------------------------------------------------------------------------------------------------------------------|------|
| analysis of the multicentre, double-blind, phase 3 randomised controlled trial                                                                                                                   | H, Harbeck, N, Zhang, K, Theall, KP, Jiang, Y, Bartlett, CH, Koehler, M; Slamon, D                                                                                                                                                                                         |      |
| A comparative study of etanercept plus methotrexate and methotrexate alone in Taiwanese patients with active rheumatoid arthritis: a 12-week, double-blind, randomized, placebo-controlled study | Lan, , JL, Chou, SJ, Chen, DY, Chen, YH, Hsieh, TY; Young, M                                                                                                                                                                                                               | 2004 |
| Trial Evaluating Chemoprophylaxis Against Travelers' Diarrhea - Prevent TD                                                                                                                       | NCT02498301                                                                                                                                                                                                                                                                | 2015 |
| Evidence-Based Review of Clinical Studies on Trauma                                                                                                                                              |                                                                                                                                                                                                                                                                            | 2009 |
| Electrocardiographic remodeling in patients paced for heart failure                                                                                                                              | Vogt, , J, Krahnefeld, O, Lamp, B, Hansky, B, Kirkels, H, Minami, K, Korfer, R, Horstkotte, D, Kloss, M; Auricchio, A                                                                                                                                                      | 2000 |
| Pentoxifylline in Diabetic Kidney Disease                                                                                                                                                        | NCT03625648                                                                                                                                                                                                                                                                | 2018 |
| Volasertib Versus Chemotherapy in Platinum-Resistant or -Refractory Ovarian Cancer: a Randomized Phase II Groupe des Investigateurs Nationaux pour l'Etude des Cancers de l'Ovaire Study         | Pujade-Lauraine, , E, Selle, F, Weber, B, Ray-Coquard, IL, Vergote, I, Sufliarsky, J, Del Campo, JM, Lortholary, A, Lesoin, A, Follana, P, Freyer, G, Pardo, B, Vidal, L, Tholander, B, Gladieff, L, Sassi, M, Garin-Chesa, P, Nazabadioko, S, Marzin, K, Pilz, K; Joly, F | 2016 |
| Efficacy and safety of coadministration of ezetimibe and simvastatin in African-American patients with primary hypercholesterolemia                                                              | Rodney, , RA, Sugimoto, D, Wagman, B, Zieve, F, Kerzner, B, Strony, J, Yang, B, Suresh, R; Veltri, E                                                                                                                                                                       | 2006 |
| Nivolumab in Treating Patients With Localized Kidney Cancer Undergoing Nephrectomy                                                                                                               | NCT03055013                                                                                                                                                                                                                                                                | 2017 |
| Functional changes in adipose tissue in a randomised controlled trial of physical activity                                                                                                       | Sjögren, , P, Sierra-Johnson, J, Kallings, LV, Cederholm, T, Kolak, M, Halldin, M, Brismar, K, de Faire, U, Hellénus, ML; Fisher, RM                                                                                                                                       | 2012 |
| Cytokine and clinical response to Saccharomyces boulardii therapy in diarrhea-dominant irritable bowel syndrome: a randomized trial                                                              | Abbas, , Z, Yakoob, J, Jafri, W, Ahmad, Z, Azam, Z, Usman, MW, Shamim, S; Islam, M                                                                                                                                                                                         | 2014 |
| Usefulness of sparflaxacin against Chlamydia pneumoniae infection in patients with bronchial asthma                                                                                              | Horiguchi, , T, Miyazaki, J, Ohira, D, Watanabe, Y, Hayashi, N, Kobayashi, K, Torigoe, T, Fukumoto, K, Ito, T, Hirose, M, Sasaki, Y, Shiga, M, Kondo, R, Handa, M; Tachikawa, S                                                                                            | 2005 |
| Effects of Nopales (Opuntia Spp.) on Lipoprotein Profile and Oxidative Stress in Moderately Hypercholesterolemic Adults                                                                          | NCT02209493                                                                                                                                                                                                                                                                | 2014 |
| Inflammation and pro-resolution inflammation after hepatobiliary surgery                                                                                                                         | Cata, , JP, Velasquez, JF, Ramirez, MF, Vauthey, JN, Gottumukkala, V, Conrad, C, Kim, BJ; Aloia, T                                                                                                                                                                         | 2017 |
| Sulfasalazine in ankylosing spondylitis: a prospective, randomized, double-blind placebo-controlled study and comparison with other controlled studies                                           | Schmidt, , WA, Wierth, S, Milleck, D, Droste, U; Gromnica-Ihle, E                                                                                                                                                                                                          | 2002 |
| Effects of oral alendronate on BMD in adult patients with osteogenesis imperfecta: a 3-year randomized placebo-controlled trial                                                                  | Chevreil, , G, Schott, AM, Fontanges, E, Charrin, JE, Lina-Granade, G, Duboeuf, F, Garnero, P, Arlot, M, Raynal, C; Meunier, PJ                                                                                                                                            | 2006 |
| Randomized double blind crossover trial of Aloe vera, Cnidioscolus chayamansa and placebo for reducing hyperglycemia in women with early metabolic syndrome                                      | Cardenas-Ibarra, , L, Villarreal-Perez, JZ, Lira-Castillo, JC; Nava-Aleman, A                                                                                                                                                                                              | 2017 |
| Probiotic therapy for spondyloarthritis: a randomised controlled trial                                                                                                                           | Jenks, , K, Stebbings, S, Burton, J, Schultz, M, Herbison, P; Highton, J                                                                                                                                                                                                   | 2010 |
| Rosiglitazone Evaluated for Cardiac Outcomes and Regulation of Glycaemia in Diabetes (RECORD): study design and protocol                                                                         | Home, , PD, Pocock, SJ, Beck-Nielsen, H, Gomis, R, Hanefeld, M, Dargie, H, Komajda, M, Gubb, J, Biswas, N; Jones, NP                                                                                                                                                       | 2005 |
| Development of a highly sensitive and specific method for detection of circulating tumor cells harboring somatic mutations in non-small-cell lung cancer patients                                | Breitenbuecher, , F, Hoffarth, S, Worm, K, Cortes-Incio, D, Gauler, TC, Köhler, J, Herold, T, Schmid, KW, Freitag, L, Kasper, S; Schuler, M                                                                                                                                | 2014 |
| A placebo-controlled pilot study of intensification of antiretroviral therapy with mycophenolate mofetil                                                                                         | Kaur, , R, Bedimo, R, Kvanli, MB, Turner, D, Shaw, L; Margolis, D                                                                                                                                                                                                          | 2006 |
| Effect of exercise training on estimated GFR, vascular health, and cardiorespiratory fitness in patients with CKD: a pilot randomized controlled trial                                           | Greenwood, , SA, Koufaki, P, Mercer, TH, MacLaughlin, HL, Rush, R, Lindup, H, O'Connor, E, Jones, C, Hendry, BM, Macdougall, IC; Cairns, HS                                                                                                                                | 2015 |
| Propranolol inhibits stress-related gene expression profiles associated with adverse clinical outcomes in autologous hematopoietic cell transplantation recipients                               | Knight, , J, Rizzo, JD, Hari, P, Kerswill, S, D'Souza, A, Logan, BR, Hamadani, M, Chhabra, S, Dhakal, B, Shah, N; Cole, S                                                                                                                                                  | 2018 |
| The effect of a high-egg diet on cardiovascular risk factors in people with type 2 diabetes: the Diabetes and Egg (DIABEGG) study-a 3-mo randomized controlled trial                             | Fuller, , NR, Caterson, ID, Sainsbury, A, Denyer, G, Fong, M, Geroft, J, Baqleh, K, Williams, KH, Lau, NS; Markovic, TP                                                                                                                                                    | 2015 |
| Mortality in dialysis patients may not be associated with ESA dose: a 2-year prospective observational study                                                                                     | McMahon, , LP, Cai, MX, Baweja, S, Holt, SG, Kent, AB, Perkovic, V, Leikis, MJ; Becker, GJ                                                                                                                                                                                 | 2012 |
| The use of a Cissus quadrangularis formulation in the management of weight loss and metabolic syndrome                                                                                           | Oben, , J, Kuate, D, Agbor, G, Momo, C; Talla, X                                                                                                                                                                                                                           | 2006 |
| Autologous tumor lysate-pulsed dendritic cell immunotherapy with cytokine-induced killer cells improves survival in gastric and colorectal cancer patients                                       | Gao, , D, Li, C, Xie, X, Zhao, P, Wei, X, Sun, W, Liu, HC, Alexandrou, AT, Jones, J, Zhao, R; Li, JJ                                                                                                                                                                       | 2014 |
| Extensive peritoneal lavage decreases postoperative C-reactive protein concentrations: a RCT                                                                                                     | De Cicco, , C, Schonman, R, Ussia, A; Koninckx, PR                                                                                                                                                                                                                         | 2015 |
| High-volume online haemodiafiltration improves erythropoiesis-stimulating agent (ESA) resistance in comparison with low-flux bicarbonate dialysis: results of the REDERT study                   | Panichi, , V, Scatena, A, Rosati, A, Giusti, R, Ferro, G, Malagnino, E, Capitanini, A, Piluso, A, Conti, P, Bernabini, G, Migliori, M, Caiani, D, Tetta, C, Casani, A, Betti, G; Pizzarelli, F                                                                             | 2015 |
| The effect of neutral peritoneal dialysis solution with low glucose-degradation-product on the fluid status and body composition - A randomized control trial                                    | Szeto, , C-C, Kwan, BCH, Chow, K-M, Cheng, PMS, Kwong, VWK, Choy, ASM, Law, M-C, Leung, C-B; Li, PKT                                                                                                                                                                       | 2015 |
| Simvastatin effects on androgens, inflammatory mediators, and endogenous pituitary gonadotropins among patients with PCOS                                                                        | Rashidi, , B, Abediasl, J, Tehraninejad, E, Rahmanpour, H; Sills, ES                                                                                                                                                                                                       | 2011 |



|                                                                                                                                                                                                                                        |                                                                                                                                                                                                                                                                                                                                                                                                                                                                             |      |
|----------------------------------------------------------------------------------------------------------------------------------------------------------------------------------------------------------------------------------------|-----------------------------------------------------------------------------------------------------------------------------------------------------------------------------------------------------------------------------------------------------------------------------------------------------------------------------------------------------------------------------------------------------------------------------------------------------------------------------|------|
| undergoing IVF: results from a prospective, randomized, placebo-controlled clinical trial                                                                                                                                              |                                                                                                                                                                                                                                                                                                                                                                                                                                                                             |      |
| A Randomized Controlled Trial of Atorvastatin in Patients With Bronchiectasis Infected With <i>Pseudomonas Aeruginosa</i> : a Proof of Concept Study                                                                                   | Bedi, , P, Chalmers, JD, Graham, C, Clarke, A, Donaldson, S, Doherty, C, Govan, JRW, Davidson, DJ, Rossi, AG; Hill, AT                                                                                                                                                                                                                                                                                                                                                      | 2017 |
| Improved estimation of glomerular filtration rate by serum cystatin C in preventing contrast induced nephropathy by N-acetylcysteine or zinc–preliminary results                                                                       | Kimmel, , M, Butscheid, M, Brenner, S, Kuhlmann, U, Klotz, U; Alscher, DM                                                                                                                                                                                                                                                                                                                                                                                                   | 2008 |
| The effects of rosiglitazone, metformin, and estradiol-cyproterone acetate on lean patients with polycystic ovary syndrome                                                                                                             | Cetinkalp, , S, Karadeniz, M, Erdogan, M, Ozgen, G, Saygl, F; Ylmaz, C                                                                                                                                                                                                                                                                                                                                                                                                      | 2009 |
| Golimumab in patients with active rheumatoid arthritis despite methotrexate therapy: results through 2 years of the GO-FORWARD study extension                                                                                         | Keystone, , EC, Genovese, MC, Hall, S, Miranda, PC, Bae, SC, Palmer, W, Wu, Z, Xu, S; Hsia, EC                                                                                                                                                                                                                                                                                                                                                                              | 2013 |
| Circulating histones for predicting prognosis after cardiac surgery: a prospective study                                                                                                                                               | Gao, , H, Zhang, N, Lu, F, Yu, X, Zhu, L, Mo, X; Wang, W                                                                                                                                                                                                                                                                                                                                                                                                                    | 2016 |
| Long-term safety and feasibility of three-vessel multimodality intravascular imaging in patients with ST-elevation myocardial infarction: the IBIS-4 (integrated biomarker and imaging study) substudy                                 | Taniwaki, , M, Radu, MD, Garcia-Garcia, HM, Heg, D, Kelbaek, H, Holmvang, L, Moschovitis, A, Noble, S, Pedrazzini, G, Saunamaki, K, Dijkstra, J, Landmesser, U, Wenaweser, P, Meier, B, Stefanini, GG, Roffi, M, Luscher, TF, Windecker, S; Raber, L                                                                                                                                                                                                                        | 2015 |
| Safety, efficacy, and pharmacokinetics of intravenous rigosertib in Japanese patients with recurrent/relapsed or refractory myelodysplastic syndromes: a multicenter, open-label, phase i study                                        | Ogura, , M, Kobayashi, Y, Kubonishi, S, Hidaka, M, Uchida, T; Takamatsu, Y                                                                                                                                                                                                                                                                                                                                                                                                  | 2017 |
| Comparison of early enteral nutrition in severe acute pancreatitis with prebiotic fiber supplementation versus standard enteral solution: a prospective randomized double-blind study                                                  | Karakan, , T, Ergun, M, Dogan, I, Cindoruk, M; Unal, S                                                                                                                                                                                                                                                                                                                                                                                                                      | 2007 |
| Flaxseed consumption reduces blood pressure in patients with hypertension by altering circulating oxylipins via an $\alpha$ -linolenic acid-induced inhibition of soluble epoxide hydrolase                                            | Caligiuri, , SP, Aukema, HM, Ravandi, A, Guzman, R, Dibrov, E; Pierce, GN                                                                                                                                                                                                                                                                                                                                                                                                   | 2014 |
| Randomized trial of atorvastatin for reduction of postoperative atrial fibrillation in patients undergoing cardiac surgery: results of the ARMYDA-3 (Atorvastatin for Reduction of MYocardial Dysrhythmia After cardiac surgery) study | Patti, , G, Chello, M, Candura, D, Pasceri, V, D'Ambrosio, A, Covino, E; Di Sciascio, G                                                                                                                                                                                                                                                                                                                                                                                     | 2006 |
| Randomized phase II trial of erlotinib or standard chemotherapy in patients with advanced non-small-cell lung cancer and a performance status of 2                                                                                     | Lilenbaum, , R, Axelrod, R, Thomas, S, Dowlati, A, Seigel, L, Albert, D, Witt, K; Botkin, D                                                                                                                                                                                                                                                                                                                                                                                 | 2008 |
| High-Dose Versus Low-Dose Pitavastatin in Japanese Patients With Stable Coronary Artery Disease (REAL-CAD): a Randomized Superiority Trial                                                                                             | Taguchi, , I, Iimuro, S, Iwata, H, Takashima, H, Abe, M, Amiya, E, Ogawa, T, Ozaki, Y, Sakuma, I, Nakagawa, Y, Hibi, K, Hiro, T, Fukumoto, Y, Hokimoto, S, Miyauchi, K, Yamazaki, T, Ito, H, Otsuji, Y, Kimura, K, Takahashi, J, Hirayama, A, Yokoi, H, Kitagawa, K, Urabe, T, Okada, Y, Terayama, Y, Toyoda, K, Nagao, T, Matsumoto, M, Ohashi, Y, Kaneko, T, Fujita, R, Ohtsu, H, Ogawa, H, Daida, H, Shimokawa, H, Saito, Y, Kimura, T, Inoue, T, Matsuzaki, M; Nagai, R | 2018 |
| Addition of Liraglutide to Insulin in Patients With Type 1 Diabetes: a Randomized Placebo-Controlled Clinical Trial of 12 Weeks                                                                                                        | Kuhadiya, , ND, Dhindsa, S, Ghanim, H, Mehta, A, Makdissi, A, Batra, M, Sandhu, S, Hejna, J, Green, K, Bellini, N, Yang, M, Chaudhuri, A; Dandona, P                                                                                                                                                                                                                                                                                                                        | 2016 |
| Associations between C-reactive protein levels and cognition during the first 6 months after acute psychosis                                                                                                                           | Fathian, , F, Løberg, EM, Gjestad, R, Steen, VM, Kroken, RA, Jørgensen, HA; Johnsen, E                                                                                                                                                                                                                                                                                                                                                                                      | 2019 |
| Probiotics Ameliorate Stool Consistency in Patients with Chronic Constipation: a Randomized, Double-Blind, Placebo-Controlled Study                                                                                                    | Yoon, , JY, Cha, JM, Oh, JK, Tan, PL, Kim, SH, Kwak, MS, Jeon, JW; Shin, HP                                                                                                                                                                                                                                                                                                                                                                                                 | 2018 |
| ATTIRE: albumin To prevenT Infection in chronic liveR failure: study protocol for a single-arm feasibility trial                                                                                                                       | China, , L, Muirhead, N, Skene, SS, Shabir, Z, De Maeyer, RP, Maini, A, Gilroy, DW; O'Brien, AJ                                                                                                                                                                                                                                                                                                                                                                             | 2016 |
| A new paradigm between mechanical scaling and root planing combined with adjunctive chemotherapy for glycated hemoglobin improvement in diabetics                                                                                      | Al Mubarak, , S, Abou Rass, M, Alsuwyed, A, Al-Zoman, K, Al Sohail, A, Sobki, S, Tariq, M, Alwin Robert, A, Ciancio, S; Dandona, P                                                                                                                                                                                                                                                                                                                                          | 2010 |
| Factor VIII-mimetic function of humanized bispecific antibody in hemophilia A                                                                                                                                                          | Shima, , M, Hanabusa, H, Taki, M, Matsushita, T, Sato, T, Fukutake, K, Fukazawa, N, Yoneyama, K, Yoshida, H; Nogami, K                                                                                                                                                                                                                                                                                                                                                      | 2016 |
| The neutrophil/lymphocyte ratio (N/L) is a prognostic marker in patients with diffuse large b cell lymphoma: a prospective study from the lazio lymphoma registry                                                                      | Annibali, , O, Hohaus, S, Tomarchio, V, Borza, PA, Cantonetti, M, Battistini, R, Montanaro, M, Angelis, FD, Cimino, G, Palombi, F, Liberati, AM, Abruzzese, E, Tesei, C, Tisi, MC, Alma, E, Rizzuto, G, Pupo, L, Zoli, V, Maiolo, E, Ansuinelli, M, Naso, V, Bianchi, MP; Cox, MC                                                                                                                                                                                           | 2016 |
| Micronutrient supplemented probiotic yogurt for HIV-infected adults taking HAART in London, Canada                                                                                                                                     | Hemsworth, , JC, Hekmat, S; Reid, G                                                                                                                                                                                                                                                                                                                                                                                                                                         | 2012 |
| Interleukin-1beta inhibition and the prevention of recurrent cardiovascular events: rationale and Design of the Canakinumab Anti-inflammatory Thrombosis Outcomes Study (CANTOS)                                                       | Ridker, , PM, Thuren, T, Zalewski, A; Libby, P                                                                                                                                                                                                                                                                                                                                                                                                                              | 2011 |
| Dietary Flaxseed Reduces Central Aortic Blood Pressure Without Cardiac Involvement but Through Changes in Plasma Oxylipins                                                                                                             | Caligiuri, , SP, Rodriguez-Leyva, D, Aukema, HM, Ravandi, A, Weighell, W, Guzman, R; Pierce, GN                                                                                                                                                                                                                                                                                                                                                                             | 2016 |
| Duration of remission after halving of the etanercept dose in patients with ankylosing spondylitis: a randomized, prospective, long-term, follow-up study                                                                              | Cantini, , F, Niccoli, L, Cassara, E, Kaloudi, O; Nannini, C                                                                                                                                                                                                                                                                                                                                                                                                                | 2013 |
| Efficacy of a meal replacement diet plan compared to a food-based diet plan after a period of weight loss and weight maintenance: a randomized controlled trial                                                                        | Davis, , LM, Coleman, C, Kiel, J, Rampolla, J, Hutchisen, T, Ford, L, Andersen, WS; Hanlon-Mitola, A                                                                                                                                                                                                                                                                                                                                                                        | 2010 |
| Active anti-amyloid immunotherapy with UB-311 vaccine: design, baseline data and study update of a phase IIa, randomized, doubleblind, placebo-controlled, 3-arm parallelgroup, multicenter study                                      | Verma, , A, Yu, HJ, Chen, H-C; Wang, CY                                                                                                                                                                                                                                                                                                                                                                                                                                     | 2018 |

|                                                                                                                                                                                                                                                                    |                                                                                                                                                                                                                                                                                                                            |      |
|--------------------------------------------------------------------------------------------------------------------------------------------------------------------------------------------------------------------------------------------------------------------|----------------------------------------------------------------------------------------------------------------------------------------------------------------------------------------------------------------------------------------------------------------------------------------------------------------------------|------|
| Impact of an 8-Month Trial Using Height-Adjustable Desks on Children's Classroom Sitting Patterns and Markers of Cardio-Metabolic and Musculoskeletal Health                                                                                                       | Contardo Ayala, , AM, Salmon, J, Timperio, A, Sudholz, B, Ridgers, ND, Sethi, P; Dunstan, DW                                                                                                                                                                                                                               | 2016 |
| Influence of perindopril, rosuvastatin, or omega-3 polyunsaturated fatty acids on efficacy of antirecurrence therapy with sotalol in patients with persistent atrial fibrillation                                                                                  | Kanorskiĭ, , SG, Bodrikova, VV; Kanorskaia, IuS                                                                                                                                                                                                                                                                            | 2007 |
| Randomized Phase II Trial of Scribantumab in Combination With Paclitaxel in Patients With Advanced Platinum-Resistant or -Refractory Ovarian Cancer                                                                                                                | Liu, , JF, Ray-Coquard, I, Selle, F, Poveda, AM, Cibula, D, Hirte, H, Hilpert, F, Raspagliesi, F, Gladieff, L, Harter, P, Siena, S, Del Campo, JM, Tabah-Fisch, I, Pearlberg, J, Moyo, V, Riahi, K, Nering, R, Kubasek, W, Adiwijaya, B, Czibere, A, Naumann, RW, Coleman, RL, Vergote, I, MacBeath, G; Pujade-Lauraine, E | 2016 |
| Adalimumab improves sleep and sleep quality in patients with active ankylosing spondylitis                                                                                                                                                                         | Rudwaleit, , M, Gooch, K, Michel, B, Herold, M, Thorner, A, Wong, R, Kron, M, Chen, N; Kupper, H                                                                                                                                                                                                                           | 2011 |
| C-reactive protein level and the incidence of eligibility for statin therapy: the multi-ethnic study of atherosclerosis                                                                                                                                            | Mann, , DM, Shimbo, D, Cushman, M, Lakoski, S, Greenland, P, Blumenthal, RS, Michos, ED, Lloyd-Jones, DM; Muntner, P                                                                                                                                                                                                       | 2013 |
| Clinical and Functional Outcomes Associated With Myocardial Injury After Transfemoral and Transapical Transcatheter Aortic Valve Replacement: a Subanalysis From the PARTNER Trial (Placement of Aortic Transcatheter Valves)                                      | Paradis, , JM, Maniar, HS, Lasala, JM, Kodali, S, Williams, M, Lindman, BR, Damiano, RJ, Moon, MR, Makkar, RR, Thourani, VH, Babaliaros, V, Xu, K, Ayele, GM, Svensson, L, Leon, MB; Zajarias, A                                                                                                                           | 2015 |
| BEAC or BEAM for high-dose therapy in patients with non-Hodgkin's lymphoma? A single centre analysis on toxicity and efficacy                                                                                                                                      | Jantunen, , E, Kuittinen, T; Nousiainen, T                                                                                                                                                                                                                                                                                 | 2003 |
| Worsening Renal Function in Patients With Acute Heart Failure Undergoing Aggressive Diuresis Is Not Associated With Tubular Injury                                                                                                                                 | Ahmad, , T, Jackson, K, Rao, VS, Tang, WHW, Brisco-Bacik, MA, Chen, HH, Felker, GM, Hernandez, AF, O'Connor, CM, Sabbisetti, VS, Bonventre, JV, Wilson, FP, Coca, SG; Testani, JM                                                                                                                                          | 2018 |
| The Effects of a Low-Carbohydrate Diet vs. a Low-Fat Diet on Novel Cardiovascular Risk Factors: a Randomized Controlled Trial                                                                                                                                      | Hu, , T, Yao, L, Reynolds, K, Whelton, PK, Niu, T, Li, S, He, J; Bazzano, LA                                                                                                                                                                                                                                               | 2015 |
| Prevalence and incidence of clinically diagnosed knee, hip and hand osteoarthritis in women with polycystic ovary syndrome: a national register-based study                                                                                                        | Sanchez-Santos, , MT, Rubin, KH, Glintborg, D, Andersen, MS, Kluzek, S; Abrahamsen, B                                                                                                                                                                                                                                      | 2018 |
| The HYPERFlax trial for determining the anti-HYPERTensive effects of dietary flaxseed in newly diagnosed stage 1 hypertensive patients: study protocol for a randomized, double-blinded, controlled clinical trial                                                 | Caligiuri, , SP, Penner, B; Pierce, GN                                                                                                                                                                                                                                                                                     | 2014 |
| Secukinumab and Sustained Improvement in Signs and Symptoms of Patients With Active Ankylosing Spondylitis Through Two Years: results From a Phase III Study                                                                                                       | Marzo-Ortega, , H, Sieper, J, Kivitz, A, Blanco, R, Cohen, M, Martin, R, Readie, A, Richards, HB; Porter, B                                                                                                                                                                                                                | 2017 |
| Acute coronary syndromes and diabetes: is intensive lipid lowering beneficial? Results of the PROVE IT-TIMI 22 trial                                                                                                                                               | Ahmed, , S, Cannon, CP, Murphy, SA; Braunwald, E                                                                                                                                                                                                                                                                           | 2006 |
| RELAY+, an Exploratory Study of Gefitinib with Ramucirumab in Untreated Patients with EGFR Mutation-Positive Metastatic NSCLC                                                                                                                                      | Nishio, , M, Nishio, K, Suzukawa, K, Omori, Y, Enatsu, S, Visseren-Grul, C; Nakagawa, K                                                                                                                                                                                                                                    | 2018 |
| Effectiveness of disease-specific cognitive-behavioural therapy on depression, anxiety, quality of life and the clinical course of disease in adolescents with inflammatory bowel disease: study protocol of a multicentre randomised controlled trial (HAPPY-IBD) | van den Brink, , G, Stapersma, L, Marroun, HE, Henrichs, J, Szigethy, EM, Utens, EM; Escher, JC                                                                                                                                                                                                                            | 2016 |
| Similar Impact of Clopidogrel or Ticagrelor on Carotid Atherosclerotic Plaque Inflammation                                                                                                                                                                         | Oh, , M, Lee, CW, Lee, HS, Chang, M, Ahn, J-M, Park, D-W, Kang, S-J, Lee, S-W, Kim, Y-H, Moon, DH, Park, S-W; Park, S-J                                                                                                                                                                                                    | 2016 |
| Omega-3 fatty acids are protective against paclitaxel-induced peripheral neuropathy: a randomized double-blind placebo controlled trial                                                                                                                            | Ghoreishi, , Z, Esfahani, A, Djazayeri, A, Djalali, M, Golestan, B, Ayromlou, H, Hashemzade, S, Asghari Jafarabadi, M, Montazeri, V, Keshavarz, SA; Darabi, M                                                                                                                                                              | 2012 |
| Long-term erythromycin therapy is associated with decreased chronic obstructive pulmonary disease exacerbations                                                                                                                                                    | Seemungal, , TA, Wilkinson, TM, Hurst, JR, Perera, WR, Sapsford, RJ; Wedzicha, JA                                                                                                                                                                                                                                          | 2008 |
| Epicardial fat thickness regression with continuous positive airway pressure therapy in patients with obstructive sleep apnea: assessment by two-dimensional echocardiography                                                                                      | Çetin, , S, Vural, MG, Gündüz, H, Akdemir, R; Firat, H                                                                                                                                                                                                                                                                     | 2016 |
| Use of rosuvastatin in HIV-associated chronic obstructive pulmonary disease                                                                                                                                                                                        | Morris, , A, Fitzpatrick, M, Bertolet, M, Qin, S, Kingsley, L, Leo, N, Kessinger, C, Michael, H, McMahon, D, Weinman, R, Stone, S, Leader, JK, Kleerup, E, Huang, L; Wisniewski, SR                                                                                                                                        | 2017 |
| Safety, pharmacokinetics and pharmacodynamics of the oral toll-like receptor 7 agonist GS-9620 in treatment-naïve patients with chronic hepatitis C                                                                                                                | Lawitz, , E, Gruener, D, Marbury, T, Hill, J, Webster, L, Hassman, D, Nguyen, AH, Pflanz, S, Mogalian, E, Gaggar, A, Massetto, B, Subramanian, GM, McHutchison, JG, Jacobson, IM, Freilich, B; Rodriguez-Torres, M                                                                                                         | 2015 |
| Study on the Optimal Strategy for Acute-on-chronic Liver Failure With Integrative Treatment                                                                                                                                                                        | NCT03577938                                                                                                                                                                                                                                                                                                                | 2018 |
| Korean traditional Chungkookjang improves body composition, lipid profiles and atherogenic indices in overweight/obese subjects: a double-blind, randomized, crossover, placebo-controlled clinical trial                                                          | Byun, , MS, Yu, OK, Cha, YS; Park, TS                                                                                                                                                                                                                                                                                      | 2016 |
| Antioxidative capacity of a dietary supplement on retinal hemodynamic function in a human lipopolysaccharide (LPS) model                                                                                                                                           | Told, , R, Schmidl, D, Palkovits, S, Boltz, A, Gouya, G, Wolzt, M, Witkowska, KJ, Popa-Cherecheanu, A, Werkmeister, RM, Garhöfer, G; Schmetterer, L                                                                                                                                                                        | 2014 |
| A randomised controlled trial evaluating the impact of targeted vitamin D supplementation on endothelial function in type 2 diabetes mellitus: the DIMENSION trial                                                                                                 | Dalan, , R, Liew, H, Assam, PN, Chan, ES, Siddiqui, FJ, Tan, AW, Chew, DE, Boehm, BO; Leow, MK                                                                                                                                                                                                                             | 2016 |
| Impact of a community health workers-led structured program on blood glucose control among latinos with type 2 diabetes: the DIALBEST trial                                                                                                                        | Pérez-Escamilla, , R, Damio, G, Chhabra, J, Fernandez, ML, Segura-Pérez, S, Vega-López, S, Kollannor-Samuel, G, Calle, M, Shebl, FM; D'Agostino, D                                                                                                                                                                         | 2015 |
| Activity of a triamcinolone acetone/laurocapram formulation: double-blind comparisons with triamcinolone acetone, placebo vehicle, and mid-strength (Class IV) to potent (Class II) corticosteroids                                                                | Cato, , A, Sutton, L, Kaplan, AS; Manning III, GN                                                                                                                                                                                                                                                                          | 2001 |

|                                                                                                                                                                                                                                       |                                                                                                                                                                                                                                                                                                                                                                                                                                 |      |
|---------------------------------------------------------------------------------------------------------------------------------------------------------------------------------------------------------------------------------------|---------------------------------------------------------------------------------------------------------------------------------------------------------------------------------------------------------------------------------------------------------------------------------------------------------------------------------------------------------------------------------------------------------------------------------|------|
| Catumaxomab with and without prednisolone premedication for the treatment of malignant ascites due to epithelial cancer: results of the randomised phase IIIB CASIMAS study                                                           | Sehouli, , J, Pietzner, K, Wimberger, P, Vergote, I, Rosenberg, P, Schneeweiss, A, Bokemeyer, C, Salat, C, Scambia, G, Berton-Rigaud, D, Santoro, A, Cervantes, A, Trédan, O, Tournigand, C, Colombo, N, Dudnichenko, AS, Westermann, A, Friccius-Quecke, H; Lordick, F                                                                                                                                                         | 2014 |
| Effects of a 5-lipoxygenase-activating protein inhibitor on biomarkers associated with risk of myocardial infarction: a randomized trial                                                                                              | Hakonarson, , H, Thorvaldsson, S, Helgadóttir, A, Gudbjartsson, D, Zink, F, Andresdóttir, M, Manolescu, A, Arnar, DO, Andersen, K, Sigurdsson, A, Thorgeirsson, G, Jonsson, A, Agnarsson, U, Bjornsdóttir, H, Gottskalksson, G, Einarsson, A, Gudmundsdóttir, H, Adalsteinsdóttir, AE, Gudmundsson, K, Kristjansson, K, Hardarson, T, Kristinsson, A, Topol, EJ, Gulcher, J, Kong, A, Gurney, M, Thorgeirsson, G; Stefansson, K | 2005 |
| Whey protein lowers blood pressure and improves endothelial function and lipid biomarkers in adults with prehypertension and mild hypertension: results from the chronic Whey2Go randomized controlled trial                          | Fekete, , ÁA, Giromini, C, Chatzidiakou, Y, Givens, DI; Lovegrove, JA                                                                                                                                                                                                                                                                                                                                                           | 2016 |
| Relative efficacy of atorvastatin 80 mg and pravastatin 40 mg in achieving the dual goals of low-density lipoprotein cholesterol <70 mg/dl and C-reactive protein <2 mg/l: an analysis of the PROVE-IT TIMI-22 trial                  | Ridker, , PM, Morrow, DA, Rose, LM, Rifai, N, Cannon, CP; Braunwald, E                                                                                                                                                                                                                                                                                                                                                          | 2005 |
| Human herpesvirus 8 (KSHV) contamination of peripheral blood and autograft products from multiple myeloma patients                                                                                                                    | Vescio, , RA, Wu, CH, Zheng, L, Sheen, D, Ma, H, Liu, J, Stewart, AK, Ballester, O, Noga, SJ, Rugo, H, Freytes, C, Stadtmayer, E, Sahebi, F, Tarantolo, S, Stiff, P, Schiller, GJ, White, M, Jacobs, C, DiPersio, J, Anderson, KC; Berenson, JR                                                                                                                                                                                 | 2000 |
| Beneficial effect of refined red palm oil on lipid peroxidation and monocyte tissue factor in HCV-related liver disease: a randomized controlled study                                                                                | Catanzaro, , R, Zerbinati, N, Solimene, U, Marcellino, M, Mohania, D, Italia, A, Ayala, A; Marotta, F                                                                                                                                                                                                                                                                                                                           | 2016 |
| Endocannabinoid blockade for improving glycemic control and lipids in patients with type 2 diabetes mellitus                                                                                                                          | Hollander, P                                                                                                                                                                                                                                                                                                                                                                                                                    | 2007 |
| Determining the identity and functional specialization of peritoneal mononuclear phagocytes in peritoneal dialysis patients                                                                                                           | Liao, , C-T, Fraser, DJ, Topley, N; Taylor, PR                                                                                                                                                                                                                                                                                                                                                                                  | 2015 |
| n-3 polyunsaturated fatty acids and adiponectin in patients with end-stage renal disease                                                                                                                                              | Harving, , F, Svensson, M, Flyvbjerg, A, Schmidt, EB, Jørgensen, KA, Eriksen, HH; Christensen, JH                                                                                                                                                                                                                                                                                                                               | 2015 |
| Lack of efficacy of an immunomodulatory macrolide in childhood HIV related bronchiectasis: a randomised, placebo-controlled trial                                                                                                     | Masekela, , R, Anderson, R, Gongxeka, H, Steel, HC, Becker, PJ; Green, RJ                                                                                                                                                                                                                                                                                                                                                       | 2013 |
| Effects of Exercise by Neuromuscular Stimulation in Dialysis Patients                                                                                                                                                                 | NCT03517553                                                                                                                                                                                                                                                                                                                                                                                                                     | 2018 |
| Subcutaneous Injection of Triamcinolone and Lidocaine to Prevent Postherpetic Neuralgia                                                                                                                                               | Ni, , J, Wang, X, Tang, Y, Yang, L, Zeng, Y; Guo, Y                                                                                                                                                                                                                                                                                                                                                                             | 2017 |
| Short-term high-dose atorvastatin for periprocedural myocardial infarction prevention in patients with renal dysfunction                                                                                                              | Toso, , A, Leoncini, M, Maioli, M, Gallopin, M, Tedeschi, D, Amato, M; Bellandi, F                                                                                                                                                                                                                                                                                                                                              | 2011 |
| Topical resiquimod 0.01% gel decreases herpes simplex virus type 2 genital shedding: a randomized, controlled trial                                                                                                                   | Mark, , KE, Corey, L, Meng, TC, Magaret, AS, Huang, ML, Selke, S, Slade, HB, Tyring, SK, Warren, T, Sacks, SL, Leone, P, Bergland, VA; Wald, A                                                                                                                                                                                                                                                                                  | 2007 |
| The effects of a whole grain-enriched hypocaloric diet on cardiovascular disease risk factors in men and women with metabolic syndrome                                                                                                | Katcher, , HI, Legro, RS, Kunselman, AR, Gillies, PJ, Demers, LM, Bagshaw, DM; Kris-Etherton, PM                                                                                                                                                                                                                                                                                                                                | 2008 |
| Application of urinary proteomics as possible risk predictor of renal and cardiovascular complications in patients with type 2-diabetes and microalbuminuria                                                                          | Oellgaard, , J, Gaede, P, Persson, F, Rossing, P, Parving, H-H; Pedersen, O                                                                                                                                                                                                                                                                                                                                                     | 2018 |
| Triterpenoids and polysaccharide peptides-enriched Ganoderma lucidum: a randomized, double-blind placebo-controlled crossover study of its antioxidation and hepatoprotective efficacy in healthy volunteers                          | Chiu, , HF, Fu, HY, Lu, YY, Han, YC, Shen, YC, Venkatakrishnan, K, Golovinskaia, O; Wang, CK                                                                                                                                                                                                                                                                                                                                    | 2017 |
| Aerobic exercise improves gastrointestinal motility in psychiatric inpatients                                                                                                                                                         | Kim, , YS, Song, BK, Oh, JS; Woo, SS                                                                                                                                                                                                                                                                                                                                                                                            | 2014 |
| Efficacy and safety of mavrilimumab in subjects with rheumatoid arthritis                                                                                                                                                             | Burmester, , GR, Weinblatt, ME, McInnes, IB, Porter, D, Barbarash, O, Vatutin, M, Szombati, I, Esfandiari, E, Sleeman, MA, Kane, CD, Cavet, G, Wang, B, Godwood, A; Magrini, F                                                                                                                                                                                                                                                  | 2013 |
| The effects of vagus nerve stimulation on tryptophan metabolites in children with intractable epilepsy                                                                                                                                | Klinkenberg, , S, van den Borne, CJH, Aalbers, MW, Verschuure, P, Kessels, AG, Leenen, L, Rijkers, K, Aldenkamp, AP, Vles, JSH; Majoie, HJM                                                                                                                                                                                                                                                                                     | 2014 |
| A long-term, open-label trial of the safety and efficacy of etanercept (Enbrel) in patients with rheumatoid arthritis not treated with other disease-modifying antirheumatic drugs                                                    | Klareskog, , L, Gaubitz, M, Rodriguez-Valverde, V, Malaise, M, Dougados, M; Wajdula, J                                                                                                                                                                                                                                                                                                                                          | 2006 |
| Effectiveness of dapagliflozin on vascular endothelial function and glycemic control in patients with early-stage type 2 diabetes mellitus: DEFENCE study                                                                             | Shigiyama, , F, Kumashiro, N, Miyagi, M, Ikehara, K, Kanda, E, Uchino, H; Hirose, T                                                                                                                                                                                                                                                                                                                                             | 2017 |
| Twenty years of systemic therapy for breast cancer                                                                                                                                                                                    | Mina, , L; Sledge Jr, GW                                                                                                                                                                                                                                                                                                                                                                                                        | 2006 |
| Neurodevelopment of Preterm Infants at 24 Months After Neonatal Supplementation of a Prebiotic Mix: a Randomized Trial                                                                                                                | van den Berg, , JP, Westerbeek, EA, Bröring-Starre, T, Garssen, J; van Elburg, RM                                                                                                                                                                                                                                                                                                                                               | 2016 |
| Genetic Counselling in the Prevention of Mental Health Consequences of Cannabis Use                                                                                                                                                   | NCT03601026                                                                                                                                                                                                                                                                                                                                                                                                                     | 2018 |
| A phase III, double-blind, randomized trial of palonosetron compared with ondansetron in preventing chemotherapy-induced nausea and vomiting following highly emetogenic chemotherapy                                                 | Aapro, , MS, Grunberg, SM, Manikhas, GM, Olivares, G, Suarez, T, Tjulandin, SA, Bertoli, LF, Yunus, F, Morrica, B, Lordick, F; Macciocchi, A                                                                                                                                                                                                                                                                                    | 2006 |
| Short- and long-term efficacy of intra-articular injections with betamethasone as part of a treat-to-target strategy in early rheumatoid arthritis: impact of joint area, repeated injections, MRI findings, anti-CCP, IgM-RF and CRP | Hetland, , ML, Østergaard, M, Ejbjerg, B, Jacobsen, S, Stengaard-Pedersen, K, Junker, P, Lottenburger, T, Hansen, I, Andersen, LS, Tarp, U, Svendsen, A, Pedersen, JK, Skjold, H, Ellingsen, T, Lindegaard, H, Pødenphant, J; Hørslev-Petersen, K                                                                                                                                                                               | 2012 |

|                                                                                                                                                                                                                                                         |                                                                                                                                                                                                                                             |      |
|---------------------------------------------------------------------------------------------------------------------------------------------------------------------------------------------------------------------------------------------------------|---------------------------------------------------------------------------------------------------------------------------------------------------------------------------------------------------------------------------------------------|------|
| Rationale and Design of the ARREST Trial Investigating Mesenchymal Stem Cells in the Treatment of Small Abdominal Aortic Aneurysm                                                                                                                       | Wang, , SK, Green, LA, Gutwein, AR, Drucker, NA, Motaganahalli, RL, Fajardo, A, Babbey, CM; Murphy, MP                                                                                                                                      | 2018 |
| Effects of a 14-month low-cost maintenance training program in patients with chronic systolic heart failure: a randomized study                                                                                                                         | Prescott, , E, Hjarde-Hansen, R, Dela, F, Ørskild, B, Teisner, AS; Nielsen, H                                                                                                                                                               | 2009 |
| Introduction of a prognostic biomarker to strengthen risk stratification of acutely admitted patients: rationale and design of the TRIAGE III cluster randomized interventional trial                                                                   | Sandø, , A, Schultz, M, Eugen-Olsen, J, Rasmussen, LS, Køber, L, Kjoller, E, Jensen, BN, Ravn, L, Lange, T; Iversen, K                                                                                                                      | 2016 |
| Soluble CD40 ligand in acute and chronic heart failure                                                                                                                                                                                                  | Ueland, , T, Aukrust, P, Yndestad, A, Otterdal, K, Frøland, SS, Dickstein, K, Kjekshus, J, Gullestad, L; Damås, JK                                                                                                                          | 2005 |
| A randomized, placebo-controlled trial of pentoxifylline on erythropoiesis-stimulating agent hyporesponsiveness in anemic patients with CKD: the Handling Erythropoietin Resistance With Oxpentifylline (HERO) trial                                    | Johnson, , DW, Pascoe, EM, Badve, SV, Dalziel, K, Cass, A, Clarke, P, Ferrari, P, McDonald, SP, Morrish, AT, Pedagogos, E, Perkovic, V, Reidlinger, D, Scaria, A, Walker, R, Vergara, LA; Hawley, CM                                        | 2015 |
| Effect of folic acid and betaine supplementation on flow-mediated dilation: a randomized, controlled study in healthy volunteers                                                                                                                        | Olthof, , MR, Bots, ML, Katan, MB; Verhoef, P                                                                                                                                                                                               | 2006 |
| Host and microbiological factors related to dental caries development                                                                                                                                                                                   | De Soet, , JJ, van Gemert-Schriks, MC, Laine, ML, van Amerongen, WE, Morré, SA; van Winkelhoff, AJ                                                                                                                                          | 2008 |
| Sulphasalazine in ankylosing spondylitis: a prospective, randomized, double-blind, placebo-analysis of other controlled studies                                                                                                                         | Schmidt, , WA, Wierth, S, Milleck, D, Droste, U; Gromnica-Ihle, E                                                                                                                                                                           | 2002 |
| Infliximab reduces the frequency of interleukin 17-producing cells and the amounts of interleukin 17 in patients with rheumatoid arthritis                                                                                                              | Shen, , H, Xia, L, Lu, J; Xiao, W                                                                                                                                                                                                           | 2010 |
| Effect of a high-fiber diet vs a fiber-supplemented diet on C-reactive protein level                                                                                                                                                                    | King, , DE, Egan, BM, Woolson, RF, Mainous, AG, Al-Solaiman, Y; Jesri, A                                                                                                                                                                    | 2007 |
| Taurine supplementation has anti-atherogenic and anti-inflammatory effects before and after incremental exercise in heart failure                                                                                                                       | Ahmadian, , M, Roshan, VD, Aslani, E; Stannard, SR                                                                                                                                                                                          | 2017 |
| A Placebo-Controlled Double-Blind Study Demonstrates the Clinical Efficacy of a Novel Herbal Formulation for Relieving Joint Discomfort in Human Subjects with Osteoarthritis of Knee                                                                   | Karlapudi, , V, Prasad Mungara, AVV, Sengupta, K, Davis, BA; Raychaudhuri, SP                                                                                                                                                               | 2018 |
| Postprandial effects of long-term niacin/laropiprant use on glucose and lipid metabolism and on cardiovascular risk in patients with polycystic ovary syndrome                                                                                          | Aye, , MM, Kilpatrick, ES, Afolabi, P, Wootton, SA, Rigby, AS, Coady, AM, Sandeman, DD; Atkin, SL                                                                                                                                           | 2014 |
| Myocardial oxidative stress, and cell injury comparing three different techniques for coronary artery bypass grafting                                                                                                                                   | van Boven, , WJ, Gerritsen, WB, Driessen, AH, Morshuis, WJ, Waanders, FG, Haas, FJ, van Dongen, EP; Aarts, LP                                                                                                                               | 2008 |
| Etrolizumab induction therapy improved endoscopic score, patient-reported outcomes, and inflammatory biomarkers in patients with moderate to severe UC who had failed TNF antagonist therapy: results from the hickory open-label induction (OLI) trial | Peyrin-Biroulet, , L, Rubin, DT, Feagan, BG, Oh, YS, Arulmani, U, Tyrrell, H, Maciucia, R, Williams, S, Tole, S; Thommes, J                                                                                                                 | 2017 |
| Standardized parenteral alanyl-glutamine dipeptide supplementation is not beneficial in autologous transplant patients: a randomized, double-blind, placebo controlled study                                                                            | Pytlík, , R, Benes, P, Patorková, M, Chocenská, E, Gregora, E, Procházka, B; Kozák, T                                                                                                                                                       | 2002 |
| Ivabradine and Bisoprolol on Doppler-derived Coronary Flow Velocity Reserve in Patients with Stable Coronary Artery Disease: beyond the Heart Rate                                                                                                      | Tagliamonte, , E, Cirillo, T, Rigo, F, Astarita, C, Coppola, A, Romano, C; Capuano, N                                                                                                                                                       | 2015 |
| Improved glutathione status in young adult patients with cystic fibrosis supplemented with whey protein                                                                                                                                                 | Grey, , V, Mohammed, SR, Smountas, AA, Bahlool, R; Lands, LC                                                                                                                                                                                | 2003 |
| TElmisartan in the management of abDominal aortic aneurYsm (TEDY): the study protocol for a randomized controlled trial                                                                                                                                 | Morris, , DR, Cunningham, MA, Ahimastos, AA, Kingwell, BA, Pappas, E, Bourke, M, Reid, CM, Stijnen, T, Dalman, RL, Aalami, OO, Lindeman, JH, Norman, PE, Walker, PJ, Fitridge, R, Bourke, B, Dear, AE, Pinchbeck, J, Jaeggi, R; Golledge, J | 2015 |
| Recurrent Pericarditis                                                                                                                                                                                                                                  | Imazio, , M, Gribaudo, E; Gaita, F                                                                                                                                                                                                          | 2017 |
| Long-term follow-up of cardiovascular risk factors after exercise training in obese children                                                                                                                                                            | Maggio, , AB, Aggoun, Y, Martin, XE, Marchand, LM, Beghetti, M; Farpour-Lambert, NJ                                                                                                                                                         | 2011 |
| Beneficial effects of a Paleolithic diet on cardiovascular risk factors in type 2 diabetes: a randomized cross-over pilot study                                                                                                                         | Jönsson, , T, Granfeldt, Y, Åhrén, B, Branell, UC, Pålsson, G, Hansson, A, Söderström, M; Lindeberg, S                                                                                                                                      | 2009 |
| Patient-reported outcomes and the association with clinical response in patients with active psoriatic arthritis treated with golimumab: findings through 2 years of a phase III, multicenter, randomized, double-blind, placebo-controlled trial       | Kavanaugh, , A, McInnes, IB, Krueger, GG, Gladman, D, Beutler, A, Gathany, T, Mack, M, Tandon, N, Han, C; Mease, P                                                                                                                          | 2013 |
| Effect of cilostazol treatment on adiponectin and soluble CD40 ligand levels in diabetic patients with peripheral arterial occlusion disease                                                                                                            | Hsieh, , CJ; Wang, PW                                                                                                                                                                                                                       | 2009 |
| Buccal administration of human colostrum: impact on the oral microbiota of premature infants                                                                                                                                                            | Sohn, , K, Kalanetra, KM, Mills, DA; Underwood, MA                                                                                                                                                                                          | 2016 |
| MTRX1011A, a humanized anti-CD4 monoclonal antibody, in the treatment of patients with rheumatoid arthritis: a phase I randomized, double-blind, placebo-controlled study incorporating pharmacodynamic biomarker assessments                           | Scheerens, , H, Su, Z, Irving, B, Townsend, MJ, Zheng, Y, Stefanich, E, Chindalore, V, Bingham, CO; Davis, JC                                                                                                                               | 2011 |
| Randomized phase III trial of pegfilgrastim versus filgrastim after autologous peripheral blood stem cell transplantation                                                                                                                               | Gerds, , A, Fox-Geiman, M, Dawravoo, K, Rodriguez, T, Toor, A, Smith, S, Kiley, K, Fletcher-Gonzalez, D, Hicks, C; Stiff, P                                                                                                                 | 2010 |
| Febuxostat improves endothelial function in hemodialysis patients with hyperuricemia: a randomized controlled study                                                                                                                                     | Tsuruta, , Y, Kikuchi, K, Tsuruta, Y, Sasaki, Y, Moriyama, T, Itabashi, M, Takei, T, Uchida, K, Akiba, T, Tsuchiya, K; Nitta, K                                                                                                             | 2015 |
| A study comparing the safety and clinical effects of different formulations of a new vaccine, ACI-24 with placebo in patients with mild Alzheimer's disease                                                                                             | EUCTR2018-000445-39-FI                                                                                                                                                                                                                      | 2018 |
| Low doses of losartan and trandolapril improve arterial stiffness in hemodialysis patients                                                                                                                                                              | Ichihara, , A, Hayashi, M, Kaneshiro, Y, Takemitsu, T, Homma, K, Kanno, Y, Yoshizawa, M, Furukawa, T, Takenaka, T; Saruta, T                                                                                                                | 2005 |

|                                                                                                                                                                                                                                                                                                                                                                                                                                                                                                                                   |                                                                                                                                                                                                                                                                                                                                                                                                                                                                                          |      |
|-----------------------------------------------------------------------------------------------------------------------------------------------------------------------------------------------------------------------------------------------------------------------------------------------------------------------------------------------------------------------------------------------------------------------------------------------------------------------------------------------------------------------------------|------------------------------------------------------------------------------------------------------------------------------------------------------------------------------------------------------------------------------------------------------------------------------------------------------------------------------------------------------------------------------------------------------------------------------------------------------------------------------------------|------|
| C-reactive protein and future cardiovascular events in statin-treated patients with angina pectoris: the extended TRUTH study                                                                                                                                                                                                                                                                                                                                                                                                     | Nozue, , T, Fukui, K, Yamamoto, S, Kunishima, T, Umezawa, S, Onishi, Y, Tohyama, S, Takeyama, Y, Morino, Y, Yamauchi, T, Hibi, K, Sozu, T, Terashima, M; Michishita, I                                                                                                                                                                                                                                                                                                                   | 2013 |
| A Multi-Center Single Arm Phase II Study of MDX-010 (BMS-734016) Monotherapy in Patients with Previously Treated Unresectable Stage III or IV Melanoma. Revised Protocol 01, incorporating Amendment 02; and Pharmacogenetics Blood Sample Amendment #01, version 1.0 dated 01-Jul-05, Pharmacogenomics Archived Tissue Sample Amendment #03, version 1 dated 29-Mar-06 and Pharmacogenomic Biomarker Sample Amendment #04, version 1 dated 03-Apr-06                                                                             | EUCTR2005-002051-41-NO                                                                                                                                                                                                                                                                                                                                                                                                                                                                   | 2006 |
| Phase II clinical trial, conducted in different sites, with random assignation of treatment, where neither the patient or the medical doctor know the assigned treatment, drug or placebo, to evaluate the efficacy and safety of Rifaximin delayed release 400 mg tablet in the prevention of post-operative endoscopic Crohn's disease recurrence                                                                                                                                                                               | EUCTR2017-002258-36-BE                                                                                                                                                                                                                                                                                                                                                                                                                                                                   | 2017 |
| Effect of short-term colchicine treatment on endothelial function in patients with coronary artery disease                                                                                                                                                                                                                                                                                                                                                                                                                        | Kajikawa, , M, Higashi, Y, Tomiyama, H, Maruhashi, T, Kurisu, S, Kihara, Y, Mutoh, A; Ueda, S-I                                                                                                                                                                                                                                                                                                                                                                                          | 2019 |
| Parenteral nutrition-associated hyperglycemia in non-critically ill inpatients increases the risk of in- hospital mortality (multicenter study)                                                                                                                                                                                                                                                                                                                                                                                   | Olveira, , G, Tapia, MJ, Ocon, J, Cabrejas-Gomez, C, Ballesteros-Pomar, MD, Vidal-Casario, A, Arraiza-Irigoyen, C, Olivares, J, Conde-Garcia, MDC, Garcia-Manzanares, A, Botella-Romero, F, Quilez-Toboso, RP, Cabrerizo, L, Matia, P, Chicharro, L, Burgos, R, Pujante, P, Ferrer, M, Zugasti, A, Prieto, J, Dieguez, M, Carrera, MJ, Vila-Bundo, A, Urgeles, JR, Aragon-Valera, C, Rovira, A, Breton, I, Garcia-Peris, P, Munoz-Garach, A, Marquez, E, Olmo, DD, Pereira, JL; Tous, MC | 2013 |
| Randomized, Double-Blind, Placebo-Controlled Phase II Study Comparing the Safety of Ipilimumab Administered With or Without Prophylactic Oral Budesonide (Entocort EC) in Patients with Unresectable Stage III or IV Malignant Melanoma Revised Protocol 03 Incorporating Amendment 02, 03 and 05 (version 1.0, dated 12-Mar-07) + Pharmacogenetics Blood Sample Amendment 01 - Site Specific (version 1.0 dated 01-Aug-05)                                                                                                       | EUCTR2005-002678-31-GB                                                                                                                                                                                                                                                                                                                                                                                                                                                                   | 2006 |
| p53-Adjusted Neoadjuvant Chemotherapy for potentially resectable Oesophageal Cancer "pANCHO". - pANCHO                                                                                                                                                                                                                                                                                                                                                                                                                            | EUCTR2006-006647-31-AT                                                                                                                                                                                                                                                                                                                                                                                                                                                                   | 2007 |
| 221AD302 Phase 3 Study of Aducanumab in Early Alzheimer's Disease                                                                                                                                                                                                                                                                                                                                                                                                                                                                 | EUCTR2015-000967-15-FR                                                                                                                                                                                                                                                                                                                                                                                                                                                                   | 2015 |
| A Study of Lebrikizumab in Patients with Chronic Obstructive Pulmonary Disease                                                                                                                                                                                                                                                                                                                                                                                                                                                    | EUCTR2015-001122-42-HU                                                                                                                                                                                                                                                                                                                                                                                                                                                                   | 2015 |
| The effect of vitamin D3 supplementation in treatment of Irritable Bowel Syndrome                                                                                                                                                                                                                                                                                                                                                                                                                                                 | IRCT2015042521935N1                                                                                                                                                                                                                                                                                                                                                                                                                                                                      | 2015 |
| Von Willebrand factor, soluble P-selectin, and target organ damage in hypertension: a substudy of the Anglo-Scandinavian Cardiac Outcomes Trial (ASCOT)                                                                                                                                                                                                                                                                                                                                                                           | Spencer, , CG, Gurney, D, Blann, AD, Beevers, DG; Lip, GY                                                                                                                                                                                                                                                                                                                                                                                                                                | 2002 |
| Receptor for Hyaluronan-Mediated Motility (RHAMM [CD168]) peptide vaccination for patients with haematological malignancies: a phase I/II pilot study                                                                                                                                                                                                                                                                                                                                                                             | ISRCTN32763606                                                                                                                                                                                                                                                                                                                                                                                                                                                                           | 2007 |
| DOUBLE BLIND, DOUBLE DUMMY, RANDOMISED, PARALLEL GROUP, MONOCENTRIC CLINICAL TRIAL ON THE EFFECTS OF CHF 1535 MDI OR SERETIDE DPI ON BIOLOGICAL AND FUNCTIONAL MARKERS OF SMALL AIRWAYS IN PATIENTS WITH ASTHMA: a PILOT STUDY - ND                                                                                                                                                                                                                                                                                               | EUCTR2006-000512-25-IT                                                                                                                                                                                                                                                                                                                                                                                                                                                                   | 2007 |
| to Determine Efficacy and Safety of Extended Drotrecogin Alfa (Activated) Therapy in Patients With Persistent Requirement for Vasopressor Support After 96-Hour Infusion With Commercial Drotrecogin Alfa (Activated)                                                                                                                                                                                                                                                                                                             | EUCTR2004-001319-71-ES                                                                                                                                                                                                                                                                                                                                                                                                                                                                   | 2012 |
| Estudio aleatorizado, abierto y con control activo sobre la seguridad, la eficacia y la farmacocinética de ferumoxitol en comparación con hierro oral para el tratamiento de la anemia ferropénica en sujetos pediátricos con nefropatía crónica dependiente de diálisis. A Randomized, Open-Label, Active-Controlled Study of the Safety, Efficacy, and Pharmacokinetics of Ferumoxitol Compared with Oral Iron for the Treatment of Iron Deficiency Anemia in Pediatric Subjects with Dialysis dependent Chronic Kidney Disease | EUCTR2010-019387-37-ES                                                                                                                                                                                                                                                                                                                                                                                                                                                                   | 2010 |
| Comparison of Efficacy and Safety of Two Biphasic Defibrillators in Cardioversion of Atrial Fibrillation                                                                                                                                                                                                                                                                                                                                                                                                                          | NCT04032678                                                                                                                                                                                                                                                                                                                                                                                                                                                                              | 2019 |
| Oral tetrahydrouridine and decitabine for non-cytotoxic epigenetic gene regulation in sickle cell disease: a randomized phase 1 study                                                                                                                                                                                                                                                                                                                                                                                             | Molokie, , R, Lavelle, D, Gowhari, M, Pacini, M, Krauz, L, Hassan, J, Ibanez, V, Ruiz, MA, Ng, KP, Woost, P, Radivoyevitch, T, Pacelli, D, Fada, S, Rump, M, Hsieh, M, Tisdale, JF, Jacobberger, J, Phelps, M, Engel, JD, Saraf, S, Hsu, LL, Gordeuk, V, DeSimone, J; Saunthararajah, Y                                                                                                                                                                                                  | 2017 |
| Study to assess the safety, tolerability, and efficacy of PF-05212384 in combination with chemotherapy in patients with metastatic colorectal cancer                                                                                                                                                                                                                                                                                                                                                                              | EUCTR2013-002096-18-ES                                                                                                                                                                                                                                                                                                                                                                                                                                                                   | 2014 |
| Trial of Invasive versus Medical therapy of Early coronary artery disease in Diabetes (TIME-DM) - TIME-DM                                                                                                                                                                                                                                                                                                                                                                                                                         | EUCTR2006-001430-40-DE                                                                                                                                                                                                                                                                                                                                                                                                                                                                   | 2006 |
| NEBIVOLOL OR METOPROLOL IN ARTERIAL OCCLUSIVE DISEASE A DOUBLE-BLIND, RANDOMISED CLINICAL Deutscher Titel: nebivolol im Vergleich zu Metoprolol bei peripherer arterieller                                                                                                                                                                                                                                                                                                                                                        | EUCTR2005-003583-31-DE                                                                                                                                                                                                                                                                                                                                                                                                                                                                   | 2006 |

|                                                                                                                                                                                              |                                                                                                                                                                         |      |
|----------------------------------------------------------------------------------------------------------------------------------------------------------------------------------------------|-------------------------------------------------------------------------------------------------------------------------------------------------------------------------|------|
| Verschchlusskrankheit Eine randomisierte, doppel-blinde klinische Studie - NORMA                                                                                                             |                                                                                                                                                                         |      |
| Kefir and Metabolic Syndrome                                                                                                                                                                 | NCT03649828                                                                                                                                                             | 2018 |
| The BP2 (Blood Pressure Postpartum) study: a 3-arm, randomised trial of follow-up and lifestyle behaviour change strategies in the first 12 months after hypertensive disorders of pregnancy | ACTRN12618002004246                                                                                                                                                     | 2018 |
| Cognitive Behavioural Therapy for Insomnia on Sleep in Rheumatoid Arthritis                                                                                                                  | NCT03766100                                                                                                                                                             | 2018 |
| IBD NURSE INTERVENTION FOR PATIENTS ASSIGNED TO BIOLOGIC THERAPY DECREASES UNCERTAINTY AND IMPROVES PATIENTSâ€™ REPORTED OUTCOMES                                                            | Barkan, , R, Goren, I, Avni-Biron, I, Snir, Y, Broitman, Y, Leibovitch, H, Banai, H, Siterman, M, Hazan, R, Pfeffer-Gik, T, Godny, L, Zonensain, K, Dotan, I; Yanai, HA | 2019 |
| Selective COX-2 inhibition improves endothelial function in coronary artery disease                                                                                                          | Chenevard, , R, Hürlimann, D, Béchir, M, Enseleit, F, Spieker, L, Hermann, M, Riesen, W, Gay, S, Gay, RE, Neidhart, M, Michel, B, Lüscher, TF, Noll, G; Ruschitzka, F   | 2003 |
| Study to evaluate the efficacy and safety of maintenance therapy with PankoMab-GEX™ after chemotherapy in patients with recurrent epithelial ovarian carcinoma                               | EUCTR2013-000931-28-DE                                                                                                                                                  | 2013 |
| Statin use and leg functioning in patients with and without lower-extremity peripheral arterial disease                                                                                      | McDermott, , MM, Guralnik, JM, Greenland, P, Pearce, WH, Criqui, MH, Liu, K, Taylor, L, Chan, C, Sharma, L, Schneider, JR, Ridker, PM, Green, D; Quann, M               | 2003 |
| An Open-Label, Multicenter, Phase III Trial of ABI-007 vs. Dacarbazine in Previously Untreated Patients with Metastatic Malignant Melanoma - ND                                              | EUCTR2007-004097-32-IT                                                                                                                                                  | 2009 |
| 221AD301 Phase 3 Study of Aducanumab in Early Alzheimer's Disease                                                                                                                            | EUCTR2015-000966-72-ES                                                                                                                                                  | 2015 |
| Endothelin and Ischemic Optic Neuropathy study group                                                                                                                                         | EUCTR2014-000848-14-FR                                                                                                                                                  | 2015 |
| Multi-centre, randomized, double-blind, placebo-controlled, phase II study of SER150TBS in type II diabetic patients                                                                         | EUCTR2014-003985-25-DE                                                                                                                                                  | 2015 |
| Improvement in the outcome of rejection with pentoxifylline in renal transplantation: a randomized controlled trial                                                                          | Noel, , C, Hazzan, M, Labalette, M, Coppin, MC, Jude, B, Dessaint, JP; Lelievre, G                                                                                      | 1998 |
| Cytomegalovirus-specific immune monitoring to guide pre-emptive therapy surveillance protocol for prevention of cytomegalovirus infection after renal transplantation                        | ACTRN12618000913279                                                                                                                                                     | 2018 |
| Comparison of Preconditioning Effect of High Dose and Low Dose Atorvastatin Treatment in Patients Underwent CABG                                                                             | IRCT2017080619470N61                                                                                                                                                    | 2017 |
| Peptide-based vaccine in combination or not with chemotherapy in melanoma patients: a phase II randomized clinical study. - ND                                                               | EUCTR2008-008211-26-IT                                                                                                                                                  | 2009 |
| Clinical efficacy and cell mobilization activity of pegfilgrastim in patients with gynaecological malignancies in therapy with topotecan. - ND                                               | EUCTR2007-006069-34-IT                                                                                                                                                  | 2007 |
| Interventions for maintenance of surgically induced remission in Crohn's disease: a network meta-analysis                                                                                    | Iheozor-Ejiofor, , Z, Gordon, M, Clegg, A, Freeman, SC, Gjuladin-Hellon, T, MacDonald, JK; Akobeng, AK                                                                  | 2019 |
| Public health deworming programmes for soil-transmitted helminths in children living in endemic areas                                                                                        | Taylor-Robinson, , DC, Maayan, N, Donegan, S, Chaplin, M; Garner, P                                                                                                     | 2019 |
| Topical cyclosporine A therapy for dry eye syndrome                                                                                                                                          | de Paiva, , CS, Pflugfelder, SC, Ng, SM; Akpek, EK                                                                                                                      | 2019 |
| Interventions for uterine fibroids: an overview of Cochrane Reviews                                                                                                                          | Brito, , LG, Stewart, EA, Olivi Chaim, SO, Martins, WP; Farquhar, C                                                                                                     | 2019 |
| Presurgery conditioning interventions (prehabilitation) in adults undergoing lower limb surgery for peripheral arterial disease                                                              | Palmer, , J, Pymmer, S, Smith, GE, Harwood, AE, Ingle, L, Huang, C; Chetter, IC                                                                                         | 2019 |
| Drugs to reduce bleeding and transfusion in adults undergoing cardiac surgery: a systematic review and network meta-analysis                                                                 | Beverly, , A, Ong, G, Wilkinson, KL, Doree, C, Welton, NJ; Estcourt, LJ                                                                                                 | 2019 |
| Birth room transition support for preterm infants: a Cochrane overview                                                                                                                       | Brown, , JVE, Walsh, V; McGuire, W                                                                                                                                      | 2019 |
| Information and promotional strategies by pharmaceutical companies for clinicians                                                                                                            | Mintzes, , B, Fabbri, A, Grundy, Q, Spurling, GKP, Lexchin, J, McKenzie, JE; Bero, L                                                                                    | 2019 |
| Interventions for replacing missing teeth: maintaining and recovering soft tissue health around dental implants                                                                              | Grusovin, , MG, Coulthard, P, Worthington, HV, George, P; Esposito, M                                                                                                   | 2010 |
| Interventions for replacing missing teeth: different times for loading dental implants                                                                                                       | Esposito, , M, Grusovin, MG, Maghairh, H; Worthington, HV                                                                                                               | 2013 |
| Interventions for replacing missing teeth: management of soft tissues for dental implants                                                                                                    | Esposito, , M, Maghairh, H, Grusovin, MG, Ziounas, I; Worthington, HV                                                                                                   | 2012 |
| Interventions for replacing missing teeth: attachment systems for implant overdentures in edentulous jaws                                                                                    | Payne, , AGT, Alsabeeha, NHM, Atieh, MA, Esposito, M, Ma, S; Anas El-Wegoud, M                                                                                          | 2018 |
| Reinforcement of anchorage during orthodontic brace treatment with implants or other surgical methods                                                                                        | Jambi, , S, Walsh, T, Sandler, J, Benson, PE, Skeggs, RM; O'Brien, KD                                                                                                   | 2014 |
| Routine scale and polish for periodontal health in adults                                                                                                                                    | Lamont, , T, Worthington, HV, Clarkson, JE; Beirne, PV                                                                                                                  | 2018 |
| Home use of interdental cleaning devices, in addition to toothbrushing, for preventing and controlling periodontal diseases and dental caries                                                | Worthington, , HV, MacDonald, L, Poklepovic Pericic, T, Sambunjak, D, Johnson, TM, Imai, P; Clarkson, JE                                                                | 2019 |
| Chlorhexidine mouthrinse as an adjunctive treatment for gingival health                                                                                                                      | James, , P, Worthington, HV, Parnell, C, Harding, M, Lamont, T, Cheung, A, Whelton, H; Riley, P                                                                         | 2017 |
| Supportive periodontal therapy (SPT) for maintaining the dentition in adults treated for periodontitis                                                                                       | Manresa, , C, Sanz-Miralles, EC, Twigg, J; Bravo, M                                                                                                                     | 2018 |
| Hormone therapy for preventing cardiovascular disease in post-menopausal women                                                                                                               | Boardman, , HMP, Hartley, L, Eisinga, A, Main, C, Roqué i Figuls, M, Bonfill Cosp, X, Gabriel Sanchez, R; Knight, B                                                     | 2015 |

|                                                                                                                                                                                           |                                                                                                                                                                  |      |
|-------------------------------------------------------------------------------------------------------------------------------------------------------------------------------------------|------------------------------------------------------------------------------------------------------------------------------------------------------------------|------|
| Long-term hormone therapy for perimenopausal and postmenopausal women                                                                                                                     | Marjoribanks, , J, Farquhar, C, Roberts, H, Lethaby, A; Lee, J                                                                                                   | 2017 |
| Interventions for treating proximal humeral fractures in adults                                                                                                                           | Handoll, , HHG; Brorson, S                                                                                                                                       | 2015 |
| Surgical options for lumbar spinal stenosis                                                                                                                                               | Machado, , GC, Ferreira, PH, Yoo, RIJ, Harris, IA, Pinheiro, MB, Koes, BW, van Tulder, MW, Rzewuska, M, Maher, CG; Ferreira, ML                                  | 2016 |
| Testosterone for peri and postmenopausal women                                                                                                                                            | Somboonporn, , W, Bell, RJ; Davis, SR                                                                                                                            | 2005 |
| Wound drainage after plastic and reconstructive surgery of the breast                                                                                                                     | Khan, , SM, Smeulders, MJC; Van der Horst, CM                                                                                                                    | 2015 |
| Urethral injection therapy for urinary incontinence in women                                                                                                                              | Kirchin, , V, Page, T, Keegan, PE, Atiemo, KOM, Cody, JD, McClinton, S; Aluko, P                                                                                 | 2017 |
| Antifibrinolytic therapy for preventing oral bleeding in people on anticoagulants undergoing minor oral surgery or dental extractions                                                     | Engelen, , ET, Schutgens, REG, Mauser-Bunschoten, EP, van Es, RJ; van Galen, KPM                                                                                 | 2018 |
| Implantable loop recorder versus conventional diagnostic workup for unexplained recurrent syncope                                                                                         | Solbiati, , M, Costantino, G, Casazza, G, Dipaola, F, Galli, A, Furlan, R, Montano, N; Sheldon, R                                                                | 2016 |
| Anaesthetic techniques for risk of malignant tumour recurrence                                                                                                                            | Cakmakaya, , OS, Kolodzie, K, Apfel, CC; Pace, NL                                                                                                                | 2014 |
| Fresh frozen plasma for cardiovascular surgery                                                                                                                                            | Desborough, , M, Sandu, R, Brunskill, SJ, Doree, C, Trivella, M, Montedori, A, Abraha, I; Stanworth, S                                                           | 2015 |
| Antimicrobial agents for preventing peritonitis in peritoneal dialysis patients                                                                                                           | Campbell, , D, Mudge, DW, Craig, JC, Johnson, DW, Tong, A; Strippoli, GFM                                                                                        | 2017 |
| Plasma transfusions prior to insertion of central lines for people with abnormal coagulation                                                                                              | Hall, , DP, Estcourt, LJ, Doree, C, Hopewell, S, Trivella, M; Walsh, TS                                                                                          | 2016 |
| Comparison of different platelet transfusion thresholds prior to insertion of central lines in patients with thrombocytopenia                                                             | Estcourt, , LJ, Desborough, M, Hopewell, S, Doree, C; Stanworth, SJ                                                                                              | 2015 |
| Implantable defibrillators versus medical therapy for cardiac channelopathies                                                                                                             | McNamara, , DA, Goldberger, JJ, Berendsen, MA; Huffman, MD                                                                                                       | 2015 |
| Closure versus medical therapy for preventing recurrent stroke in patients with patent foramen ovale and a history of cryptogenic stroke or transient ischemic attack                     | Li, , J, Liu, J, Liu, M, Zhang, S, Hao, Z, Zhang, J; Zhang, C                                                                                                    | 2015 |
| Lightweight versus Heavyweight mesh for open repair of inguinal hernia                                                                                                                    | Sajid, , MS, Leaver, C, Baig, MK; Sains, P                                                                                                                       | 2013 |
| Accommodative intraocular lens versus standard monofocal intraocular lens implantation in cataract surgery                                                                                | Ong, , HS, Evans, JR; Allan, BDS                                                                                                                                 | 2014 |
| Intraoperative interventions for preventing surgical site infection: an overview of Cochrane Reviews                                                                                      | Liu, , Z, Dumville, JC, Norman, G, Westby, MJ, Blazeby, J, McFarlane, E, Welton, NJ, O'Connor, L, Cawthorne, J, George, RP, Crosbie, EJ, Rithalia, AD; Cheng, HY | 2018 |
| Endovascular repair of abdominal aortic aneurysm                                                                                                                                          | Paravastu, , SCV, Jayarajasingam, R, Cottam, R, Palfreyman, SJ, Michaels, JA; Thomas, SM                                                                         | 2014 |
| Open retropubic colposuspension for urinary incontinence in women                                                                                                                         | Lapitan, , MCM, Cody, JD; Mashayekhi, A                                                                                                                          | 2017 |
| Surgical versus non-surgical interventions for treating humeral shaft fractures in adults                                                                                                 | Gosler, , MW, Testroote, M, Morrenhof, JW; Janzing, HMJ                                                                                                          | 2012 |
| Bladder neck needle suspension for urinary incontinence in women                                                                                                                          | Glazener, , CMA, Cooper, K; Mashayekhi, A                                                                                                                        | 2017 |
| Anterior vaginal repair for urinary incontinence in women                                                                                                                                 | Glazener, , CMA, Cooper, K; Mashayekhi, A                                                                                                                        | 2017 |
| Interventions for replacing missing teeth: Alveolar ridge preservation techniques for dental implant site development                                                                     | Atieh M.A.; Alsabeeha N.H.; Payne A.G.; Duncan W.; Faggion C.M.; Esposito M.                                                                                     | 2015 |
| Interventions for replacing missing teeth: Different types of dental implants                                                                                                             | Esposito M.; Ardebili Y.; Worthington H.V.                                                                                                                       | 2014 |
| Interventions for missing teeth: Removable prostheses for the edentulous mandible                                                                                                         | Jahangiri, , L, Choi, M, Moghadam, M; Jawad, S                                                                                                                   | 2015 |
| Periarticular analgesia for postoperative pain following total hip replacement                                                                                                            | Hadi, , M, Sprowson, A, Bucknall, T, Underwood, M, Costa, ML; Buchbinder, R                                                                                      | 2014 |
| Periarticular analgesia for postoperative pain following total knee replacement                                                                                                           | Sprowson, , A, Hadi, M, Underwood, M, Parsons, N, Bucknall, T, Costa, ML; Buchbinder, R                                                                          | 2014 |
| Interventions for replacing missing teeth: Implant placement at different levels in relation to crestal bone                                                                              | Khouly I.; Veitz-Keenan A.; Loomer P.M.; Esposito M.                                                                                                             | 2017 |
| Ridge Regeneration in Three Wall Sockets                                                                                                                                                  | NCT03548896                                                                                                                                                      | 2018 |
| Prospective pilot study to investigate the one-Abutment-one-time procedure concerning the periimplant tissue                                                                              | DRKS00013174                                                                                                                                                     | 2017 |
| Comparative analysis in implant-supported metal ceramic and hybrid ceramic crown                                                                                                          | RBR-9w9m83                                                                                                                                                       | 2018 |
| Levels of osteoclastogenesis-related factors in the peri-implant crevicular fluid and clinical parameters of immediately loaded implants in patients with osteopenia: a short-term report | Onuma, , T, Aquiar, K, Duarte, PM, Feres, M, Giro, G, Coelho, P, Cassoni, A; Shibli, JA                                                                          | 2015 |
| The effect of keratinized mucosa width on peri-implant outcome under supportive postimplant therapy                                                                                       | Frisch, Eberhard; Ziebolz, Dirk; Vach, Kirstin; Ratka-Krüger, Petra                                                                                              | 2015 |
| The influence of controlled occlusal overload on peri-implant tissue. Part 4: a histologic study in monkeys.                                                                              | Miyata, Takashi; Kobayashi, Yukinao; Araki, Hisao; Ohto, Takaichi; Shin, Kitetsu                                                                                 | 2002 |
| Detection of Prostaglandin E 2 and Matrix Metalloproteinases in Implant Crevicular Fluid.                                                                                                 | Aboyoussef, Hoda; Carter, Cristina; Jandinski, John J.; Panagakos, Fotinos S.                                                                                    | 1998 |
| Peri-implant bone level around implants with platform-switched abutments                                                                                                                  | Fickl, Stefan; Zuh, Otto; Stein, Jamal M.; Hürzeler, Markus B.                                                                                                   | 2010 |
| The causes of early implant bone loss: myth or science?                                                                                                                                   | Oh, Tae-Ju; Yoon, Joongkyo; Misch, Carl E.; Wang, Hom-Lay                                                                                                        | 2002 |

|                                                                                                                                                                                                   |                                                                                                                                                                                                                                                                                                             |      |
|---------------------------------------------------------------------------------------------------------------------------------------------------------------------------------------------------|-------------------------------------------------------------------------------------------------------------------------------------------------------------------------------------------------------------------------------------------------------------------------------------------------------------|------|
| Effects of local administration of growth hormone in peri-implant bone: an experimental study with implants in rabbit tibiae.                                                                     | Tresguerres, Isabel F.; Blanco, Luis; Clemente, Celia; Tresguerres, Jesús AF                                                                                                                                                                                                                                | 2003 |
| Effect of immobilized bone morphogenic protein 2 coating of titanium implants on peri-implant bone formation                                                                                      | Schliephake, Henning; Aref, Arash; Scharnweber, Dieter; Bierbaum, Susanne; Roessler, Sophie; Sewing, Andreas                                                                                                                                                                                                | 2005 |
| Oral implant surfaces: Part 1—review focusing on topographic and chemical properties of different surfaces and in vivo responses to them.                                                         | Albrektsson, Tomas; Wennerberg, Ann                                                                                                                                                                                                                                                                         | 2004 |
| The impact of different torques for the insertion of immediately loaded implants on the peri-implant levels of angiogenesis- and bone-related markers                                             | Verrastro Neto A.; Andrade R.; Corrêa M.G.; Casarin R.C.V.; Casati M.Z.; Pimentel S.P.; Ribeiro F.V.; Cirano F.R.                                                                                                                                                                                           | 2018 |
| Comparison of two different techniques used for the maintenance of peri-implant soft tissue health: a pilot randomized clinical trial                                                             | Al Ghazal L.; O'Sullivan J.; Claffey N.; Polyzois I.                                                                                                                                                                                                                                                        | 2017 |
| Bone Response and Soft Tissue Changes Around Implants With/Without Abutments Supporting Fixed Partial Dentures: Results From a 3-Year, Prospective, Randomized, Controlled Study                  | Göthberg C.; André U.; Gröndahl K.; Thomsen P.; Slotte C.                                                                                                                                                                                                                                                   | 2016 |
| Maxillary sinus floor elevation surgery with BioOss® mixed with a bone marrow concentrate or autogenous bone: Test of principle on implant survival and clinical performance                      | Rickert D.; Vissink A.; Slot W.J.; Sauerbier S.; Meijer H.J.A.; Raghoobar G.M.                                                                                                                                                                                                                              | 2014 |
| Gene Expression of Inflammation and Bone Healing in Peri-Implant Crevicular Fluid after Placement and Loading of Dental Implants. A Kinetic Clinical Pilot Study Using Quantitative Real-Time PCR | Slotte C.; Lennerås M.; Göthberg C.; Suska F.; Zoric N.; Thomsen P.; Nannmark U.                                                                                                                                                                                                                            | 2012 |
| Comparison of pro-inflammatory cytokines and bone metabolism mediators around titanium and zirconia dental implant abutments following a minimum of 6 months of clinical function                 | Barwacz, Christopher A.; Brogden, Kim A.; Stanford, Clark M.; Dawson, Deborah V.; Recker, Erica N.; Blanchette, Derek                                                                                                                                                                                       | 2015 |
| Can degradation products released from dental implants affect peri-implant tissues?                                                                                                               | Noronha Oliveira, M.; Schunemann, W. V. H.; Mathew, M. T.; Henriques, B.; Magini, R. S.; Teughels, W.; Souza, J. C. M.                                                                                                                                                                                      | 2018 |
| Composition of human peri-implantitis and periodontitis lesions.                                                                                                                                  | Carcuac, O.; Berglundh, T.                                                                                                                                                                                                                                                                                  | 2014 |
| Role of toll-like receptor 2 in inflammation and alveolar bone loss in experimental peri-implantitis versus periodontitis.                                                                        | Yu, X.; Hu, Y.; Freire, M.; Yu, P.; Kawai, T.; Han, X.                                                                                                                                                                                                                                                      | 2018 |
| Biomarkers and Bacteria Around Implants and Natural Teeth in the Same Individuals.                                                                                                                | Gurlek, Onder; Gumus, Pinar; Nile, Christopher J.; Lappin, David F.; Buduneli, Nurcan                                                                                                                                                                                                                       | 2017 |
| Prediction of individual implant bone levels and the existence of implant "phenotypes".                                                                                                           | Papantonopoulos, Georgios; Gogos, Christos; Housos, Efthymios; Bountis, Tassos; Loos, Bruno G.                                                                                                                                                                                                              | 2017 |
| Ligature induced peri-implantitis: tissue destruction and inflammatory progression in a murine model.                                                                                             | Nguyen Vo, Trang N.; Hao, Jia; Chou, Josh; Oshima, Masamitsu; Aoki, Kazuhiro; Kuroda, Shinji; Kaboosaya, Boosana; Kasugai, Shohei                                                                                                                                                                           | 2017 |
| A bacterial-biofilm-induced oral osteolytic infection can be successfully treated by immuno-targeting an extracellular nucleoid-associated protein.                                               | Freire, M. O.; Devaraj, A.; Young, A.; Navarro, J. B.; Downey, J. S.; Chen, C.; Bakaletz, L. O.; Zadeh, H. H.; Goodman, S. D.                                                                                                                                                                               | 2017 |
| Biology of soft tissue wound healing and regeneration—consensus report of Group 1 of the 10th European Workshop on Periodontology.                                                                | Hammerle, Christoph H. F.; Giannobile, William V.                                                                                                                                                                                                                                                           | 2014 |
| The role of lasers in the treatment of peri-implant diseases: A review.                                                                                                                           | Alshehri, Fahad Ali                                                                                                                                                                                                                                                                                         | 2016 |
| Clinical and radiographic peri-implant parameters and proinflammatory cytokine levels among cigarette smokers, smokeless tobacco users, and nontobacco users.                                     | Akram, Zohaib; Vohra, Fahim; Bukhari, Ishfaq A.; Sheikh, Saeed A.; Javed, Fawad                                                                                                                                                                                                                             | 2018 |
| Host-derived biomarkers at teeth and implants in partially edentulous patients. A                                                                                                                 | Ramseier, Christoph A.; Eick, Sigrun; Bronnimann, Claudia; Buser, Daniel; Bragger, Urs; Salvi, Giovanni E.                                                                                                                                                                                                  | 2016 |
| Comparison of Peri-Implant Soft Tissue Parameters and Crestal Bone Loss Around Immediately Loaded and Delayed Loaded Implants in Smokers and Non-Smokers: 5-Year Follow-Up Results.               | Al Amri, Mohammad D.; Kellesarian, Sergio Varela; Abduljabbar, Tariq S.; Al Rifaiy, Mohammad Q.; Al Baker, Abdulaziz M.; Al-Kheraif, Abdulaziz A.                                                                                                                                                           | 2017 |
| Comparison between inflammation-related markers in peri-implant crevicular fluid and clinical parameters during osseointegration in edentulous jaws.                                              | Bielemann, Amalia M.; Marcello-Machado, Raissa M.; Leite, Fabio Renato Manzolli; Martinho, Frederico Canato; Chagas-Junior, Otacilio Luiz; Antoninha Del Bel Cury, Altair; Faot, Fernanda                                                                                                                   | 2018 |
| Haplotypes in BMP4 and FGF Genes Increase the Risk of Peri-Implantitis.                                                                                                                           | Coelho, Renata Barboza; Goncalves, Roberto Junior; Villas-Boas, Ricardo de Mello; Bonato, Leticia Ladeira; Quinelato, Valquiria; Pinheiro, Aristides da Rosa; Machado, Aldir; Nunes, Carlos Henrique Ramirez; Goncalves, Rackel; Vieira, Alexandre Resende; Granjeiro, Jose Mauro; Casado, Priscila Ladeira | 2016 |
| The Influence of Smoking on the Peri-Implant Microbiome.                                                                                                                                          | Tsigarida, A. A.; Dabdoub, S. M.; Nagaraja, H. N.; Kumar, P. S.                                                                                                                                                                                                                                             | 2015 |
| The pathology of bone tissue during peri-implantitis.                                                                                                                                             | Schminke, B.; Vom Orde, F.; Gruber, R.; Schliephake, H.; Burgers, R.; Miosge, N.                                                                                                                                                                                                                            | 2015 |
| Establishment of Epithelial Attachment on Titanium Surface Coated with Platelet Activating Peptide.                                                                                               | Sugawara, Shiho; Maeno, Masahiko; Lee, Cliff; Nagai, Shigemi; Kim, David M.; Da Silva, John; Nagai, Masazumi; Kondo, Hisatomo                                                                                                                                                                               | 2016 |
| An Exploratory Case-Control Study on the Impact of IL-1 Gene Polymorphisms on Early Implant Failure.                                                                                              | Cosyn, Jan; Christiaens, Veronique; Koningsveld, Vincent; Coucke, Paul J.; De Coster, Peter; De Paepe, Anne; De Bruyn, Hugo                                                                                                                                                                                 | 2016 |
| Diagnosing peri-implant disease using the tongue as a 24/7 detector.                                                                                                                              | Ritzer, J.; Luhmann, T.; Rode, C.; Pein-Hackelbusch, M.; Immohr, I.; Schedler, U.; Thiele, T.; Stubinger, S.; Rechenberg, B. V.; Waser-Althaus, J.; Schlottig, F.; Merli, M.; Dawe, H.; Karpisek, M.; Wyrwa, R.; Schnabelrauch, M.; Meinel, L.                                                              | 2017 |
| Drugs and diseases: Summary and consensus statements of group 1. The 5(th) EAO Consensus Conference 2018.                                                                                         | Schliephake, Henning; Sicilia, Alberto; Nawas, Bilal Al; Donos, Nikos; Gruber, Reinhard; Jepsen, Soren; Milinkovic, Iva; Mombelli, Andrea; Navarro, Jose Manuel; Quirynen, Marc; Rocchietta, Isabella; Schiodt, Morten; Schou, Soren; Stahl, Alexandra; Stavropoulos, Andreas                               | 2018 |



|                                                                                                                                                                                                                             |                                                                                                                                                                                                                                                                           |      |
|-----------------------------------------------------------------------------------------------------------------------------------------------------------------------------------------------------------------------------|---------------------------------------------------------------------------------------------------------------------------------------------------------------------------------------------------------------------------------------------------------------------------|------|
| Mechanism and Prevention of Titanium Particle-Induced Inflammation and Osteolysis.                                                                                                                                          | Eger, Michal; Hiram-Bab, Sahar; Liron, Tamar; Sterer, Nir; Carmi, Yaron; Kohavi, David; Gabet, Yankel                                                                                                                                                                     | 2018 |
| Clinical peri-implant parameters and inflammatory cytokine profile among smokers of cigarette, e-cigarette, and waterpipe.                                                                                                  | AlQahtani, Mohammed Ayedh; Alayad, Abdullah Saeed; Alshihri, Abdulmonem; Correa, Fernanda Oliveira Bello; Akram, Zohaib                                                                                                                                                   | 2018 |
| Impact of heavy smoking on the clinical, microbiological and immunological parameters of patients with dental implants: a prospective cross-sectional study.                                                                | Ata-Ali, Javier; Flichy-Fernandez, Antonio Juan; Alegre-Domingo, Teresa; Ata-Ali, Fadi; Penarrocha-Diago, Miguel                                                                                                                                                          | 2016 |
| Clinical and Radiographic Peri-Implant Parameters and Whole Salivary Interleukin-1beta and Interleukin-6 Levels among Type-2 Diabetic and Nondiabetic Patients with and without Peri-Implantitis.                           | Al-Askar, Mansour; Ajlan, Sumaiah; Alomar, Nuha; Al-Daghri, Nasser M.                                                                                                                                                                                                     | 2018 |
| Bone and soft tissue outcomes, risk factors, and complications of implant-supported prostheses: 5-Years RCT with different abutment types and loading protocols.                                                            | Gothberg, Catharina; Grondahl, Kerstin; Omar, Omar; Thomsen, Peter; Slotte, Christer                                                                                                                                                                                      | 2018 |
| Effect of history of periodontitis on implant success: meta-analysis and systematic review.                                                                                                                                 | Ramanauskaitė, Ausra; Baseviciene, Nomedā; Wang, Hom-Lay; Tozum, Tolga F.                                                                                                                                                                                                 | 2014 |
| Genetic involvement in dental implant failure: Association with polymorphisms of genes modulating inflammatory responses and bone metabolism.                                                                               | Chen, Xun; Zhao, Yu                                                                                                                                                                                                                                                       | 2019 |
| Proinflammatory cytokine levels and peri-implant parameters among cigarette smokers, individuals vaping electronic cigarettes, and non-smokers.                                                                             | ArRejaie, Aws S.; Al-Aali, Khulud Abdulrahman; Alrabiah, Mohammed; Vohra, Fahim; Mokeem, Sameer A.; Basunbul, Ghadeer; Alrahlah, Ali; Abduljabbar, Tariq                                                                                                                  | 2019 |
| Significant Enrichment and Diversity of the Staphylococcal Arginine Catabolic Mobile Element ACME in Staphylococcus epidermidis Isolates From Subgingival Peri-implantitis Sites and Periodontal Pockets.                   | O'Connor, Aoife M.; McManus, Brenda A.; Kinnevey, Peter M.; Brennan, Grainne I.; Fleming, Tanya E.; Cashin, Phillipa J.; O'Sullivan, Michael; Polyzois, Ioannis; Coleman, David C.                                                                                        | 2018 |
| Effect of lentiviral vector overexpression alpha-calcitonin gene-related peptide on titanium implant osseointegration in alpha-CGRP-deficient mice.                                                                         | Xiang, Lin; Ma, Li; Wei, Na; Wang, Tianlu; Yao, Qianqian; Yang, Bo; Xiong, Yi; Wu, Yingying; Gong, Ping                                                                                                                                                                   | 2017 |
| Sophocarpine attenuates wear particle-induced implant loosening by inhibiting osteoclastogenesis and bone resorption via suppression of the NF-kappaB signalling pathway in a rat model.                                    | Zhou, Chen-He; Shi, Zhong-Li; Meng, Jia-Hong; Hu, Bin; Zhao, Chen-Chen; Yang, Yu-Te; Yu, Wei; Chen, Ze-Xin; Heng, Boon Chin; Parkman, Virginia-Jeni Akila; Jiang, Shuai; Zhu, Han-Xiao; Wu, Hao-Bo; Shen, Wei-Liang; Yan, Shi-Gui                                         | 2018 |
| Identification of microbiota in peri-implantitis pockets by matrix-assisted laser desorption/ionization time-of-flight mass spectrometry.                                                                                   | Yeh, Hwey-Chin; Lu, Jang-Jih; Chang, Shih-Cheng; Ge, Mao-Cheng                                                                                                                                                                                                            | 2019 |
| Influence of titanium on in vitro fibroblast-Porphyrromonas gingivalis interaction in peri-implantitis.                                                                                                                     | Irshad, Muhammad; Scheres, Nina; Crielaard, Wim; Loos, Bruno G.; Wismeijer, Daniel; Laine, Marja L.                                                                                                                                                                       | 2013 |
| Bone loss biomarkers associated with peri-implantitis. A cross-sectional study.                                                                                                                                             | Rakic, Mia; Lekovic, Vojislav; Nikolic-Jakoba, Natasa; Vojvodic, Danilo; Petkovic-Curcin, Aleksandra; Sanz, Mariano                                                                                                                                                       | 2013 |
| Clinical and laboratory evaluation of the effects of different treatment modalities on titanium healing caps: a randomized, controlled clinical trial.                                                                      | Schmidt, Kristina Emily; Auschill, Thorsten Mathias; Heumann, Christian; Frankenberger, Roland; Eick, Sigrun; Sculean, Anton; Arweiler, Nicole Birgit                                                                                                                     | 2018 |
| VEGF, Microvessel Density, and CD44 as Inflammation Markers in Peri-implant Healthy Mucosa, Peri-implant Mucositis, and Peri-implantitis: Impact of Age, Smoking, PPD, and Obesity.                                         | Lucarini, Guendalina; Zizzi, Antonio; Rubini, Corrado; Ciolino, Francesco; Aspriello, Simone Domenico                                                                                                                                                                     | 2019 |
| Surface treatments on titanium implants via nanostructured ceria for antibacterial and anti-inflammatory capabilities.                                                                                                      | Li, Xue; Qi, Manlin; Sun, Xiaolin; Weir, Michael D.; Tay, Franklin R.; Oates, Thomas W.; Dong, Biao; Zhou, Yanmin; Wang, Lin; Xu, Hockin H. K.                                                                                                                            | 2019 |
| Influence of titanium ions on cytokine levels of murine splenocytes stimulated with periodontopathic bacterial lipopolysaccharide.                                                                                          | Nishimura, Kota; Kato, Tetsuo; Ito, Taichi; Oda, Takashi; Sekine, Hideshi; Yoshinari, Masao; Yajima, Yasutomo                                                                                                                                                             | 2014 |
| Soft tissue wound healing at teeth, dental implants and the edentulous ridge when using barrier membranes, growth and differentiation factors and soft tissue substitutes.                                                  | Vignoletti, Fabio; Nunez, Javier; Sanz, Mariano                                                                                                                                                                                                                           | 2014 |
| Clinical outcome of a nonsurgical and surgical treatment protocol in different types of peri-implantitis: a case series.                                                                                                    | Thierbach, Rene; Eger, Thomas                                                                                                                                                                                                                                             | 2013 |
| The role of nicotine, cotinine and caffeine on the electrochemical behavior and bacterial colonization to cp-Ti.                                                                                                            | Barao, Valentim A. R.; Ricomini-Filho, Antonio P.; Faverani, Leonardo P.; Del Bel Cury, Altair A.; Sukotjo, Cortino; Monteiro, Douglas R.; Yuan, Judy Chia-Chun; Mathew, Mathew T.; do Amaral, Regiane C.; Mesquita, Marcelo F.; da Silva, Wander J.; Assuncao, Wirley G. | 2015 |
| The impact of Aggregatibacter actinomycetemcomitans biofilm-derived effectors following antimicrobial photodynamic therapy on cytokines production in human gingival fibroblasts.                                           | Peeridogaheh, Hadi; Pourhajibagher, Maryam; Barikani, Hamid Reza; Bahador, Abbas                                                                                                                                                                                          | 2019 |
| In vivo osteoprotegerin gene therapy preventing bone loss induced by periodontitis.                                                                                                                                         | Tang, H.; Mattheos, N.; Yao, Y.; Jia, Y.; Ma, L.; Gong, P.                                                                                                                                                                                                                | 2015 |
| Would nitric oxide be an effective marker for earlier stages of peri-implant disease? An analysis in human peri-implant sulcular fluid.                                                                                     | Vieira, Andreia Espindola; Moura, Camilla Christian Gomes; de Souza, Maria Aparecida; Zanetta-Barbosa, Darceny; Dechichi, Paula                                                                                                                                           | 2013 |
| Cytokine, chemokine, and growth factor levels in peri-implant sulcus during wound healing and osseointegration after piezosurgical versus conventional implant site preparation: Randomized, controlled, split-mouth trial. | Gurkan, Ali; Tekdal, Gozde Peker; Bostanci, Nagihan; Belibasakis, Georgios N.                                                                                                                                                                                             | 2019 |
| Analysis of cathepsin-K activity at tooth and dental implant sites and the potential of this enzyme in reflecting alveolar bone loss.                                                                                       | Yamalik, Nermin; Gunday, Sevim; Uysal, Serdar; Kilinc, Kamer; Karabulut, Erdem; Tozum, Tolga F.                                                                                                                                                                           | 2012 |
| Antimicrobial activity of nanoparticulate metal oxides against peri-implantitis pathogens.                                                                                                                                  | Vargas-Reus, Miguel A.; Memarzadeh, Kaveh; Huang, Jie; Ren, Guogang G.; Allaker, Robert P.                                                                                                                                                                                | 2012 |
| Concentration- and time-dependent response of human gingival fibroblasts to fibroblast growth factor 2 immobilized on titanium dental implants.                                                                             | Ma, Qianli; Wang, Wei; Chu, Paul K.; Mei, Shenglin; Ji, Kun; Jin, Lei; Zhang, Yumei                                                                                                                                                                                       | 2012 |

|                                                                                                                                                                                                                                     |                                                                                                                                                                              |      |
|-------------------------------------------------------------------------------------------------------------------------------------------------------------------------------------------------------------------------------------|------------------------------------------------------------------------------------------------------------------------------------------------------------------------------|------|
| Biological factors involved in implant-anchored orthodontics and in prosthetic-implant therapy: a literature review.                                                                                                                | Antoszewska, Joanna; Raftowicz-Wojcik, Katarzyna; Kawala, Beata; Matthews-Brzozowska, Teresa                                                                                 | 2010 |
| Impact of implant overloading on the peri-implant bone in inflamed and non-inflamed peri-implant mucosa.                                                                                                                            | Kozlovsky, Avital; Tal, Haim; Laufer, Ben-Zion; Leshem, Roy; Rohrer, Michael D.; Weinreb, Miron; Artzi, Zvi                                                                  | 2007 |
| Collagenase-2 (MMP-8) as a point-of-care biomarker in periodontitis and cardiovascular diseases. Therapeutic response to non-antimicrobial properties of tetracyclines.                                                             | Sorsa, Timo; Tervahartiala, Taina; Leppilähti, Jussi; Hernandez, Marcela; Gamonal, Jorge; Tuomainen, Anita M.; Lauhio, Anneli; Pussinen, Pirkko J.; Mantyla, Paivi           | 2011 |
| Effects of diabetes mellitus on periodontal and peri-implant conditions: update on associations and risks.                                                                                                                          | Salvi, Giovanni E.; Carollo-Bittel, Barbara; Lang, Niklaus P.                                                                                                                | 2008 |
| Two-stage implant systems.                                                                                                                                                                                                          | Fritz, M. E.                                                                                                                                                                 | 1999 |
| A novel bionic design of dental implant for promoting its long-term success using nerve growth factor (NGF): utilizing nano-springs to construct a stress-cushioning structure inside the implant.                                  | He, Hao; Yao, Yang; Wang, Yanying; Wu, Yingying; Yang, Yang; Gong, Ping                                                                                                      | 2012 |
| Occult peri-implant orofacial fistulae: posterior maxillary peri-implantitis/sinusitis of zygomatic or dental implant origin. Treatment and prevention with bone morphogenetic protein-2/absorbable collagen sponge sinus grafting. | Jensen, Ole T.; Adams, Mark; Cottam, Jared R.; Ringeman, Jason                                                                                                               | 2013 |
| Single versus double flap approach in periodontal regenerative treatment.                                                                                                                                                           | Schincaglia, Gian Pietro; Hebert, Eric; Farina, Roberto; Simonelli, Anna; Trombelli, Leonardo                                                                                | 2015 |
| Immediate implant placement into fresh extraction sites with chronic periapical pathologic features combined with plasma rich in growth factors: preliminary results of single-cohort study.                                        | Del Fabbro, Massimo; Boggian, Cristiano; Taschieri, Silvio                                                                                                                   | 2009 |
| Bone formation in peri-implant defects grafted with microparticles: a pilot animal experimental study.                                                                                                                              | Moest, Tobias; Koehler, Franz; Precht, Christopher; Schmitt, Christian; Watzek, Georg; Schlegel, Karl Andreas                                                                | 2014 |
| Early colonization of non-submerged dental implants in patients with a history of advanced aggressive periodontitis.                                                                                                                | De Boever, Annemarie L.; De Boever, Jan A.                                                                                                                                   | 2006 |
| Evaluation of implant osseointegration with different regeneration techniques in the treatment of bone defects around implants: an experimental study in a rabbit model.                                                            | Guerra, Isabel; Morais Branco, Fernando; Vasconcelos, Mario; Afonso, Americo; Figueiral, Helena; Zita, Raquel                                                                | 2011 |
| Mesenchymal stem cell transplantation to promote bone healing.                                                                                                                                                                      | Gao, Chan; Seuntjens, Jan; Kaufman, Gabriel N.; Tran-Khanh, Nicolas; Butler, Alison; Li, Ailian; Wang, Huifen; Buschmann, Michael D.; Harvey, Edward J.; Henderson, Janet E. | 2012 |
| Evaluation of implants coated with recombinant human bone morphogenetic protein-2 and vacuum-dried using the critical-size supraalveolar peri-implant defect model in dogs.                                                         | Decker, John F.; Lee, Jaebum; Cortella, Carlo Alberto; Polimeni, Giuseppe; Rohrer, Michael D.; Wozney, John M.; Hall, Jan; Susin, Cristiano; Wikesjö, Ulf M. E.              | 2010 |
| Mandibular defect reconstruction using three-dimensional polycaprolactone scaffold in combination with platelet-rich plasma and recombinant human bone morphogenetic protein-2: de novo synthesis of bone in a single case.         | Schuckert, Karl-Heinz; Jopp, Stefan; Teoh, Swee-Hin                                                                                                                          | 2009 |
| Alveolar ridge augmentation using implants coated with recombinant human bone morphogenetic protein-7 (rhBMP-7/rhOP-1): histological observations.                                                                                  | Susin, Cristiano; Qahash, Mohammed; Polimeni, Giuseppe; Lu, Ping Hung; Prasad, Hari S.; Rohrer, Michael D.; Hall, Jan; Wikesjö, Ulf M. E.                                    | 2010 |
| Utility of intracerebral theta burst electrical stimulation to attenuate interhemispheric inhibition and to promote motor recovery after cortical injury in an animal model.                                                        | Barry, Melissa D.; Boddington, Laura J.; Igelstrom, Kajsia M.; Gray, Jason P.; Shemmell, Jon; Tseng, Kuei Y.; Oorschot, Dorothy E.; Reynolds, John N. J.                     | 2014 |
| Levels of osteoclastogenesis-related factors in the peri-implant crevicular fluid and clinical parameters of immediately loaded implants in patients with osteopenia: a short-term report                                           | Onuma, T.; Aquiar, K.; Duarte, PM; Feres, M; Giro, G; Coelho, P; Cassoni, A; Shibli, JA                                                                                      | 2015 |
| Enhancing osteoblast functions on biofilm-contaminated titanium alloy by concentration-dependent use of methylene blue-mediated antimicrobial photodynamic therapy                                                                  | Huang T.-C.; Chen C.-J.; Chen C.-C.; Ding S.-J.                                                                                                                              | 2019 |
| Adjunctive application of antimicrobial photodynamic therapy in the prevention of medication-related osteonecrosis of the jaw following dentoalveolar surgery: A case series                                                        | Poli P.P.; Souza F.Á.; Ferrario S.; Maiorana C.                                                                                                                              | 2019 |
| Urinothorax causing massive left side pleural effusion in a young lady; case report and literature review                                                                                                                           | Bahjat A.S.; Sadeeq K.J.; Tahir A.M.S.; Mohammed A.A.                                                                                                                        | 2019 |
| Interventions for peri-implantitis and their effects on further bone loss: A retrospective analysis of a registry-based cohort                                                                                                      | Karlsson K.; Derks J.; Håkansson J.; Wennström J.L.; Petzold M.; Berglundh T.                                                                                                | 2019 |
| Current status of dental implants survival and peri-implant bone loss in patients with uncontrolled type-2 diabetes mellitus                                                                                                        | Chambrone L.; Palma L.F.                                                                                                                                                     | 2019 |
| Immediate versus delayed loading of mandibular implant-retained overdentures: A 60-month follow-up of a randomized clinical trial                                                                                                   | Salman A.; Thacker S.; Rubin S.; Dhingra A.; Ioannidou E.; Schincaglia G.P.                                                                                                  | 2019 |
| Implant treatment of two failing or missing central incisors in the aesthetic region: a treatment protocol and 1-year prospective study                                                                                             | van Nimwegen W.G.; Raghoobar G.M.; Vissink A.; Meijer H.J.A.                                                                                                                 | 2019 |
| Influence of negative pressure wound therapy on peri-prosthetic tissue vascularization and inflammation around porous titanium percutaneous devices                                                                                 | Pawar D.R.L.; Jeyapalina S.; Hafer K.; Bachus K.N.                                                                                                                           | 2019 |
| Clinical and organizational management of cardiac implantable electronic device replacements: An Italian Survey promoted by AIAC (Italian Association of Arrhythmology and Cardiac Pacing)                                          | Palmisano P.; Ziacchi M.; Belotti G.; Rapacciuolo A.; Santini L.; Stabile G.; Zoni Berisso M.; De Ponti R.; Landolina M.; Ricci R.P.; Boriani G.                             | 2019 |
| Prevalence of peri-implant diseases among an Italian population of patients with metabolic syndrome: a cross-sectional study                                                                                                        | Papi P.; Murro B.D.; Pranno N.; Bisogni V.; Saracino V.; Letizia C.; Polimeni A.; Pompa G.                                                                                   | 2019 |
| Discomfort/pain due to periodontal and peri-implant probing with/without platform switching                                                                                                                                         | Parvini P.; Saminsky M.; Stanner J.; Klum M.; Nickles K.; Eickholz P.                                                                                                        | 2019 |
| Comparison of yeasts species in the subgingival oral biofilm of type 2-diabetic and non-diabetic individuals with peri-implantitis                                                                                                  | Alsahhaf A.; Al-Aali K.A.; Alshagroud R.S.; Alshiddi I.F.; Alrahlah A.; Abduljabbar T.; Javed F.; Vohra F.                                                                   | 2019 |

|                                                                                                                                                                                                                   |                                                                                                                                                                                                                                                                                        |      |
|-------------------------------------------------------------------------------------------------------------------------------------------------------------------------------------------------------------------|----------------------------------------------------------------------------------------------------------------------------------------------------------------------------------------------------------------------------------------------------------------------------------------|------|
| Ultrasound-triggered antibiotic release from PEEK clips to prevent spinal fusion infection: Initial evaluations                                                                                                   | Delaney L.J.; MacDonald D.; Leung J.; Fitzgerald K.; Sevit A.M.; Eisenbrey J.R.; Patel N.; Forsberg F.; Kepler C.K.; Fang T.; Kurtz S.M.; Hickok N.J.                                                                                                                                  | 2019 |
| Comparison of biofilm removal using glycine air polishing versus sodium bicarbonate air polishing or hand instrumentation on full-arch fixed implant rehabilitations: a split-mouth study                         | Menini M.; Setti P.; Dellepiane E.; Zunino P.; Pera P.; Pesce P.                                                                                                                                                                                                                       | 2019 |
| Long-Term Survival and Peri-Implant Health of Titanium Implants with Zirconia Abutments: A Systematic Review and Meta-Analysis                                                                                    | Cao Y.; Yu C.; Wu Y.; Li L.; Li C.                                                                                                                                                                                                                                                     | 2019 |
| Retrospective cohort study of 4,591 dental implants: Analysis of risk indicators for bone loss and prevalence of peri-implant mucositis and peri-implantitis                                                      | French D.; Grandin H.M.; Ofec R.                                                                                                                                                                                                                                                       | 2019 |
| Clinical evaluation of three surgical modalities in the treatment of peri-implantitis: A randomized controlled clinical trial                                                                                     | Toma S.; Brex M.C.; Lasserre J.F.                                                                                                                                                                                                                                                      | 2019 |
| Antimicrobial efficacy of copper-doped titanium surfaces for dental implants                                                                                                                                      | Astasov-Frauenhoffer M.; Koegel S.; Waltimo T.; Zimmermann A.; Walker C.; Hauser-Gerspach I.; Jung C.                                                                                                                                                                                  | 2019 |
| Tapered Versus Cylindrical Implant: Which Shape Inflicts Less Pain After Dental Implant Surgery? A Clinical Trial                                                                                                 | Samieirad S.; Mianbandi V.; Shiezhadeh F.; Hosseini-Abrishami M.; Tohidi E.                                                                                                                                                                                                            | 2019 |
| Biological width establishment around dental implants is influenced by abutment height irrespective of vertical mucosal thickness: A cluster randomized controlled trial                                          | Spinato S.; Stacchi C.; Lombardi T.; Bernardello F.; Messina M.; Zaffè D.                                                                                                                                                                                                              | 2019 |
| Development of a novel nanotextured titanium implant. An experimental study in rats                                                                                                                               | Pelegrine A.A.; Moy P.K.; Moshaverinia A.; Escada A.L.A.; Calvo-Guirado J.; Claro A.P.R.A.                                                                                                                                                                                             | 2019 |
| Stud vs Bar Attachments for Maxillary Four-Implant-Supported Overdentures: 3- to 9-year Results from a Retrospective Study                                                                                        | Lian M.; Zhao K.; Wang F.; Huang W.; Zhang X.; Wu Y.                                                                                                                                                                                                                                   | 2019 |
| Immediate dental implants placed into infected sites present a higher risk of failure than immediate dental implants placed into non-infected sites: Systematic review and meta-analysis                          | de Oliveira-Neto O.-B.; Lemos C.-A.-A.; Barbosa F.-T.; de Sousa-Rodrigues C.-F.; Camello de Lima F.-J.                                                                                                                                                                                 | 2019 |
| Implants in the Posterior Maxilla: Open Sinus Lift Versus Conventional Implant Placement. A Systematic Review                                                                                                     | Romero-Millán J.J.; Aizcorbe-Vicente J.; Peñarrocha-Diogo M.; Galindo-Moreno P.; Canullo L.; Peñarrocha-Oltra D.                                                                                                                                                                       | 2019 |
| Influence of abutment height and implant depth position on interproximal peri-implant bone in sites with thin mucosa: A 1-year randomized clinical trial                                                          | Pico A.; Martín-Lancharro P.; Caneiro L.; Nóvoa L.; Batalla P.; Blanco J.                                                                                                                                                                                                              | 2019 |
| The influence of bone loss on peri-implant bending strain under overdentures                                                                                                                                      | Pham N.Q.; Gonda T.; Takahashi T.; Maeda Y.                                                                                                                                                                                                                                            | 2019 |
| Comparison of BALP, CTX-I, and IL-4 levels around miniscrew implants during orthodontic tooth movement between two different amounts of force                                                                     | Cesur M.G.; Ozturk V.O.; Afacan B.; Sirin F.B.; Alkan A.; Ozer T.                                                                                                                                                                                                                      | 2019 |
| Mechanical Thrombectomy Using Retrieable Stents in Pediatric Acute Ischemic Stroke                                                                                                                                | Bhatti A.; Huded V.; Vyas D.; Mushtaq M.; Kekatpure M.; Hiremath S.; Sapare A.; Aggarwal R.                                                                                                                                                                                            | 2019 |
| Platelets and osteointegration during experimental augmentation of bone defects                                                                                                                                   | Gilev M.V.; Antropova I.P.; Volokitina E.A.; Bazarny V.V.                                                                                                                                                                                                                              | 2019 |
| The effect of supportive care in preventing peri-implant diseases and implant loss: A Systematic review and Meta-analysis                                                                                         | Lin C.-Y.; Chen Z.; Pan W.-L.; Wang H.-L.                                                                                                                                                                                                                                              | 2019 |
| Role of Dental Implant Superstructure in Patients with Severe Periodontal Disease                                                                                                                                 | Ito T.; Nishimura K.; Ogasawara R.; Furuya Y.; Yajima Y.                                                                                                                                                                                                                               | 2019 |
| Patients who are obese probably have worse peri-implant outcomes than those who are not, but there is not sufficient evidence that the implant survival is different                                              | Brignardello-Petersen R.                                                                                                                                                                                                                                                               | 2019 |
| Clinical, radiographic, and restorative peri-implant measurements of narrow and standard diameter implants in obese and nonobese patients: A 3-year retrospective follow-up study                                 | Alshiddi I.F.; Alshahhaf A.; Alshagroud R.S.; Al-Aali K.A.; Vohra F.; Abduljabbar T.                                                                                                                                                                                                   | 2019 |
| Implant treatment in immunosuppressed renal transplant patients: A prospective case-controlled study                                                                                                              | Hernández G.; Paredes V.; López-Pintor R.M.; de Andrés A.; de Vicente J.C.; Sanz M.                                                                                                                                                                                                    | 2019 |
| Improvement of quality of life with implant-supported mandibular overdentures and the effect of implant type and surgical procedure on bone and soft tissue stability: A three-year prospective split-mouth trial | Doomewaard R.; Glibert M.; Matthys C.; Vervaeke S.; Bronkhorst E.; De Bruyn H.                                                                                                                                                                                                         | 2019 |
| Healing differences in narrow diameter implants submitted to immediate and conventional loading in mandibular overdentures: A randomized clinical trial                                                           | Bielemann A.M.; Marcello-Machado R.M.; Schuster A.J.; Chagas Júnior O.L.; Del Bel Cury A.A.; Faot F.                                                                                                                                                                                   | 2019 |
| Regeneration of alveolar ridge defects. Consensus report of group 4 of the 15th European Workshop on Periodontology on Bone Regeneration                                                                          | Jepsen S.; Schwarz F.; Cordaro L.; Derks J.; Hämmerle C.H.F.; Heitz-Mayfield L.J.; Hernández-Alfaro F.; Meijer H.J.A.; Naenni N.; Ortiz-Vigón A.; Pjetursson B.; Raghoobar G.M.; Renvert S.; Rocchietta I.; Roccuzzo M.; Sanz-Sánchez I.; Simion M.; Tomasi C.; Trombelli L.; Urban I. | 2019 |
| Prediction of titanium implant success by analysis of microRNA expression in peri-implant tissue. A 5-year follow-up study                                                                                        | Menini M.; Pesce P.; Baldi D.; Vargas G.C.; Pera P.; Izzotti A.                                                                                                                                                                                                                        | 2019 |
| Discrepancy between patient satisfaction and biologic complication rate in patients rehabilitated with overdentures and not participating in a structured maintenance program after 7 to 12 years of loading      | Romandini M.; Cordaro M.; Donno S.; Cordaro L.                                                                                                                                                                                                                                         | 2019 |
| Application of periodontal ligament-derived multipotent mesenchymal Stromal cell sheets for periodontal regeneration                                                                                              | Onizuka S.; Iwata T.                                                                                                                                                                                                                                                                   | 2019 |
| Influence of implant neck and abutment characteristics on peri-implant tissue health and stability. Oral reconstruction foundation consensus report                                                               | Schwarz F.; Messias A.; Sanz-Sánchez I.; Carrillo de Albornoz A.; Nicolau P.; Taylor T.; Beuer F.; Schär A.; Sader R.; Guerra F.; Sanz M.                                                                                                                                              | 2019 |
| What Affects Postoperative Sinusitis and Implant Failure after Dental Implant: A Meta-analysis                                                                                                                    | Kim J.S.; Choi S.M.; Yoon J.H.; Lee E.J.; Yoon J.; Kwon S.H.; Yeo C.D.; Ryu J.S.; Lee J.H.; You Y.S.; Kim S.G.; Lee M.H.; Han B.H.                                                                                                                                                     | 2019 |

|                                                                                                                                                                                          |                                                                                                                                                                            |      |
|------------------------------------------------------------------------------------------------------------------------------------------------------------------------------------------|----------------------------------------------------------------------------------------------------------------------------------------------------------------------------|------|
| The effect of five mechanical instrumentation protocols on implant surface topography and roughness: A scanning electron microscope and confocal laser scanning microscope analysis      | Cha J.-K.; Paeng K.; Jung U.-W.; Choi S.-H.; Sanz M.; Sanz-Martin I.                                                                                                       | 2019 |
| Dental Implants With a Platform-Switched Morse Taper Connection and an Osteo Growth Induction Surface                                                                                    | Ghensi P.; Tonetto G.; Soldini C.; Bettio E.; Mortellaro C.; Soldini C.                                                                                                    | 2019 |
| Accuracy of low dose imaging protocols of CBCT in assessment of peri-implant bone defects                                                                                                | Aboelmaaty W.; Morgan N.; Abdelfadil E.; Ashmawy M.                                                                                                                        | 2019 |
| Treatment of Resorbed Mandibles with Titanium Plate and Immediate Implant-Supported Prosthesis - Case Series                                                                             | Fabris V.; Reginato V.F.; Smaniotto C.; Bacchi A.; Consani R.L.X.                                                                                                          | 2019 |
| Long-term effectiveness of maxillary sinus floor augmentation: A systematic review and meta-analysis                                                                                     | Raghoobar G.M.; Onclin P.; Boven G.C.; Vissink A.; Meijer H.J.A.                                                                                                           | 2019 |
| The effect of different occlusal contact situations on peri-implant bone stress - A contact finite element analysis of indirect axial loading                                            | Brune A.; Stiesch M.; Eisenburger M.; Greuling A.                                                                                                                          | 2019 |
| Effectiveness and clinical performance of early implant placement for the replacement of single teeth in anterior areas: A systematic review                                             | Graziani F.; Chappuis V.; Molina A.; Lazarin R.; Schmid E.; Chen S.; Salvi G.E.                                                                                            | 2019 |
| Challenges of the interface of oral medicine and periodontology: Some lessons for the future?                                                                                            | Porter S.; Johnson N.W.; Fedele S.                                                                                                                                         | 2019 |
| Use of Porous Implants for the Prosthetic Rehabilitation of Fibula Free Flap Reconstructed Patients                                                                                      | Brauner E.; Di Carlo S.; Ciolfi A.; Pompa G.; Jamshir S.; De Angelis F.; Della Monaca M.; Valentini V.                                                                     | 2019 |
| Left atrial appendage closure with WATCHMAN in Asian patients: 2year outcomes from the WASP registry                                                                                     | Phillips K.P.; Santoso T.; Sanders P.; Alison J.; Chan J.L.K.; Pak H.-N.; Chandavimol M.; Stein K.M.; Gordon N.; Razali O.B.                                               | 2019 |
| REAL-WORLD PRACTICE PATTERNS IN THE ERA OF RECTAL INDOMETHACIN FOR PROPHYLAXIS AGAINST POST-ERCP PANCREATITIS: A LARGE POPULATION-BASED STUDY                                            | Smith Z.L.; Elmunzer B.J.; Cooper G.S.; Chak A.                                                                                                                            | 2019 |
| Biological & technical outcomes of restored implants after maxillary sinus augmentation - results at 1 year loading                                                                      | Alayan J.; Ivanovski S.                                                                                                                                                    | 2019 |
| In the Dental Implant Era - Why We Still Bother Saving Teeth?                                                                                                                            | Clark D.; Levin L.                                                                                                                                                         | 2019 |
| Neurogenic Inflammation in Periimplant and Periodontal Disease: A Case-Control Split-Mouth Study                                                                                         | Sert S.; Sakallioğlu U.; Lütftioğlu M.; Aydoğdu A.; Acael E.; Günaydin M.                                                                                                  | 2019 |
| Short-term performance of implant-supported restorations fitted in general dental practice: A retrospective study                                                                        | Klotz A.-L.; Ott L.; Krisam J.; Schmitz S.; Seydaliyeva A.; Rammelsberg P.; Zenthöfer A.                                                                                   | 2019 |
| Intra-oral single site comparisons of periodontal and peri-implant microbiota in health and disease                                                                                      | Yu X.-L.; Chan Y.; Zhuang L.; Lai H.-C.; Lang N.P.; Leung W.K.; Watt R.M.                                                                                                  | 2019 |
| Veneered zirconia abutments cemented on non-original titanium bases: 1-year results of a prospective case series                                                                         | Asgeirsson A.G.; Sailer I.; Gamper F.; Jung R.E.; Hämmerle C.H.F.; Thoma D.S.                                                                                              | 2019 |
| Systemic sclerostin antibody treatment increases osseointegration and biomechanical competence of zoledronic-acid-coated dental implants in a rat osteoporosis model                     | Korn P.; Kramer I.; Schlottig F.; Tödtman N.; Eckelt U.; Bürki A.; Ferguson S.J.; Kautz A.; Schnabelrauch M.; Range U.; Kneissel M.; Stadlinger B.                         | 2019 |
| Safety of Accelerated Recovery on a Cardiology Ward and Early Discharge Following Minimalist TAVR in the Catheterization Laboratory: The Vancouver Accelerated Recovery Clinical Pathway | Sathananthan J.; Webb J.G.; Polderman J.; Achtem L.; Hensey M.; Murdoch D.; Moss R.; Shook A.; Bruce S.; Blanke P.; Bancroft C.; Andrews H.; Leipsic J.; Wood D.; Lauck S. | 2019 |
| Keratinized mucosa width is associated with severity of peri-implant mucositis. A cross-sectional study                                                                                  | Grischke J.; Karch A.; Wenzlaff A.; Foitzik M.M.; Stiesch M.; Eberhard J.                                                                                                  | 2019 |
| Prevalence and risk indicators of peri-implantitis in a sample of university-based dental patients in Italy: A cross-sectional study                                                     | Vignoletti F.; Di Domenico G.L.; Di Martino M.; Montero E.; de Sanctis M.                                                                                                  | 2019 |
| Analyses of clinical and osteoimmunological parameters on keratinized mucosa around dental implants                                                                                      | Sukuroglu E.; Baltacioglu E.                                                                                                                                               | 2019 |
| Epstein-Barr Virus-Positive Mucocutaneous Ulcer Mimicking Peri-Implantitis in a Patient With Systemic Lupus Erythematosus                                                                | Takahama A.; de Lima H.G.; Ito F.A.; Ribeiro-Silva A.; León J.E.                                                                                                           | 2019 |
| Implantoplasty associated with the regenerative treatment of peri-implantitis                                                                                                            | Austoni C.; Azzola F.; Cavalli N.; Morandi P.; Francetti L.                                                                                                                | 2019 |
| Re-osseointegration following reconstructive surgical therapy of experimental peri-implantitis. A pre-clinical in vivo study                                                             | Almohandes A.; Carcuac O.; Abrahamsson I.; Lund H.; Berglundh T.                                                                                                           | 2019 |
| Biologically guided implant therapy: A diagnostic and therapeutic strategy of conservation and preservation based on periodontal staging and grading                                     | Greenwell H.; Wang H.-L.; Kornman K.S.; Tonetti M.S.                                                                                                                       | 2019 |
| Peri implant microflora in health and disease                                                                                                                                            | Ramanathan S.; Prakash P.S.G.; Appukuttan D.; Subramanian S.; Victor D.J.                                                                                                  | 2019 |
| The W.A.I.O.T. definition of high-grade and low-grade peri-prosthetic joint infection                                                                                                    | Romanò C.L.; Khawashki H.A.; Benzakour T.; Bozhkova S.; del Sel H.; Hafez M.; Johari A.; Lob G.; Sharma H.K.; Tsuchiya H.; Drago L.                                        | 2019 |
| Peri-implant marginal bone loss rate pre- and post-loading: An exploratory analysis of associated factors                                                                                | Acharya A.; Leung M.C.T.; Ng K.T.; Fan M.H.M.; Fokas G.; Mattheos N.                                                                                                       | 2019 |
| Outcome of early dental implant placement versus other dental implant placement protocols: A systematic review and meta-analysis                                                         | Bassir S.H.; El Kholy K.; Chen C.-Y.; Lee K.H.; Intini G.                                                                                                                  | 2019 |
| Clinical and radiological evaluation of delayed and early loading of single-tooth implant placement: A 6-month, prospective, randomized, follow-up clinical study                        | Sekar S.; Suthanthiran T.; Thangavelu A.; Karupannan S.; Prem F.; Rajendran D.                                                                                             | 2019 |
| Significance of keratinized mucosa/gingiva on peri-implant and adjacent periodontal conditions in erratic maintenance compliers                                                          | Monje A.; Blasi G.                                                                                                                                                         | 2019 |
| Flapless surgery and peri-implant late-stage inflammation and healing                                                                                                                    | Schultze-Mosgau S.                                                                                                                                                         | 2019 |
| Orthognathic surgery deteriorates the osseointegration of dental implants: a propensity-matched multicenter cohort study                                                                 | Lee H.; Kim J.W.; Lim H.K.; Byun S.H.; Choi Y.J.; Lee U.L.                                                                                                                 | 2019 |
| Immediate implant placement in infected sites: a systematic review                                                                                                                       | Samara E.; Wates E.; Ria B.                                                                                                                                                | 2019 |

|                                                                                                                                                                                           |                                                                                                                                                                                                                                               |      |
|-------------------------------------------------------------------------------------------------------------------------------------------------------------------------------------------|-----------------------------------------------------------------------------------------------------------------------------------------------------------------------------------------------------------------------------------------------|------|
| Success and survival rates of dental implants inserted in homologous bone grafts                                                                                                          | Rosa M.M.; Leite G.B.; dos Santos L.E.; Vivacqua C.P.P.; Motta S.H.G.                                                                                                                                                                         | 2019 |
| Mandibular Overdentures Supported by Two vs Four Endosteal Implants: A Retrospective Cohort Study                                                                                         | Mahgoli H.; Asadi S.; Hajmahmoudi M.; Moharrami M.; Arshad M.                                                                                                                                                                                 | 2019 |
| Breast implant-associated anaplastic large-cell lymphoma                                                                                                                                  | Collins K.; DiGiuseppe J.A.                                                                                                                                                                                                                   | 2019 |
| Assessment of peri implant bone loss in basal implant: a prospective clinical study                                                                                                       | Debnath S.C.; Memmi L.; Vishnuraj R.; Bhagawati A.                                                                                                                                                                                            | 2019 |
| Pre-procedure anxiety: The origin of pain during implantation of cardiac implantable electronic devices                                                                                   | Senior J.; Liu B.; Jani A.; Apostolakis M.; Goyal D.; Taylor R.; Foster W.; Brewster N.; Wilson D.G.                                                                                                                                          | 2019 |
| DEVICE RELATED THROMBOSIS AFTER WATCHMAN IMPLANTATION: IMPACT OF POST-PROCEDURAL ANTICOAGULATION                                                                                          | Apte N.M.; Pierpoline M.; Patel A.; Longmore L.; Dar T.A.; Robinson A.; Chandler J.; Khan A.; Timins A.; Gupta K.; Wilson K.; Jipescu D.; Aftabzadeh S.; Johnson D.; Osorio J.; Earnest M.; Aryana A.; Ellis C.R.; Thambidorai S.; Reddy Y.V. | 2019 |
| The Effects of Ultraviolet Light-Emitting Diodes with Different Wavelengths on Periodontopathic Bacteria In Vitro                                                                         | Aung N.; Aoki A.; Takeuchi Y.; Hiratsuka K.; Katagiri S.; Kong S.; Shujaa Addin A.; Meinzer W.; Sumi Y.; Izumi Y.                                                                                                                             | 2019 |
| Short-term complications and their risk factors after breast surgery utilizing the NSQIP database                                                                                         | Marumoto A.; Woodruff S.; Wong L.; Yee L.                                                                                                                                                                                                     | 2019 |
| Laparoscopic artificial urinary sphincter implantation in women with stress urinary incontinence: update on 13 years' experience in a single centre                                       | Bracchitta D.; Costa P.; Borojeni S.; Ménard J.; Bryckaert P.-E.; Mandron É.                                                                                                                                                                  | 2019 |
| Mandibular implant-supported overdentures in (frail) elderly: A prospective study with 20-year follow-up                                                                                  | Bakker M.H.; Vissink A.; Meijer H.J.A.; Raghoobar G.M.; Visser A.                                                                                                                                                                             | 2019 |
| Association of Statin Use and Mortality After Transcatheter Aortic Valve Replacement                                                                                                      | Peri-Okonny P.A.; Liu Y.; Malaisrie S.C.; Huded C.P.; Kapadia S.; Thourani V.H.; Kodali S.K.; Webb J.; McAndrew T.C.; Leon M.B.; Cohen D.J.; Arnold S.V.                                                                                      | 2019 |
| Network meta-analysis of survival rate and complications in implant-supported single crowns with different abutment materials                                                             | Hu M.; Chen J.; Pei X.; Han J.; Wang J.                                                                                                                                                                                                       | 2019 |
| Complications and survival rates of 55 metal-ceramic implant-supported fixed complete-arch prostheses: A cohort study with mean 5-year follow-up                                          | Papaspyridakos P.; Bordin T.B.; Natto Z.S.; El-Rafie K.; Pagni S.E.; Chochlidakis K.; Ercoli C.; Weber H.-P.                                                                                                                                  | 2019 |
| Computer-assisted, template-guided immediate implant placement and loading in the mandible: a case report                                                                                 | Spielau T.; Hauschild U.; Katsoulis J.                                                                                                                                                                                                        | 2019 |
| Peri-Implantitis and Peri-Implant Mucositis Case Definitions in Dental Research: A Systematic Assessment                                                                                  | Natto Z.S.; Almeganni N.; Alnaakeeb E.; Bukhari Z.; Jan R.; Iacono V.J.                                                                                                                                                                       | 2019 |
| Clinical and radiographic peri-implant health status around narrow diameter implant-supported single and splinted crowns                                                                  | Al-Aali K.A.; ArRejaie A.S.; Alrahlah A.; Alfawaz Y.F.; Abduljabbar T.; Vohra F.                                                                                                                                                              | 2019 |
| Prospective controlled clinical study investigating long-term clinical parameters, patient satisfaction, and microbial contamination of zirconia implants                                 | Lorenz J.; Giuliani N.; Hölscher W.; Schwietz A.; Schwarz F.; Sader R.                                                                                                                                                                        | 2019 |
| Peri-implantitis prevalence, incidence rate, and risk factors: A study of electronic health records at a U.S. dental school                                                               | Kordbacheh Changi K.; Finkelstein J.; Papapanou P.N.                                                                                                                                                                                          | 2019 |
| Longitudinal study on risk indicators for peri-implantitis using survival-time analysis                                                                                                   | Mameno T.; Wada M.; Onodera Y.; Fujita D.; Sato H.; Ikebe K.                                                                                                                                                                                  | 2019 |
| Double Full-Arch Fixed Implant-Supported Prostheses: Outcomes and Complications after a Mean Follow-Up of 5 Years                                                                         | Papaspyridakos P.; Bordin T.B.; Natto Z.S.; Kim Y.-J.; El-Rafie K.; Tsigarida A.; Chochlidakis K.; Weber H.-P.                                                                                                                                | 2019 |
| Experimental peri-implant mucositis around titanium and zirconia implants in comparison to a natural tooth: part 2—clinical and microbiological parameters                                | Clever K.; Schlegel K.A.; Kniha H.; Conrads G.; Rink L.; Modabber A.; Hölzle F.; Kniha K.                                                                                                                                                     | 2019 |
| Diagnosis of Periimplant Disease                                                                                                                                                          | Hirooka H.; Renvert S.                                                                                                                                                                                                                        | 2019 |
| Comparison of three different types of implant-supported fixed dental prostheses: A long-term retrospective study of clinical outcomes and cost-effectiveness                             | Ravidà A.; Tattan M.; Askar H.; Barootchi S.; Tavelli L.; Wang H.-L.                                                                                                                                                                          | 2019 |
| Treatment of buccal soft tissue dehiscence around single implant: 5-year results from a prospective study                                                                                 | Roccuzzo M.; Dalmaso P.; Pittoni D.; Roccuzzo A.                                                                                                                                                                                              | 2019 |
| Clinical and radiographic peri-implant outcomes of short dental implants placed in posterior jaws of patients with treated generalized aggressive periodontitis: A 3-year follow-up study | Akram Z.; Vohra F.; Sheikh S.A.; Albaijan R.; Bukhari I.A.; Hussain M.                                                                                                                                                                        | 2019 |
| Oral and peri-implant conditions of patients at risk for medication-related osteonecrosis of the jaw (MRONJ)                                                                              | Renata V.; Sabrina X.; Antonio F.; Antonio C.; Leonardo T.                                                                                                                                                                                    | 2019 |
| Soft-Tissue Conditions Around Dental Implants: A Literature Review                                                                                                                        | Lin G.-H.; Madi I.M.                                                                                                                                                                                                                          | 2019 |
| Survival of adjacent-dental-implants in prediabetic and systemically healthy subjects at 5-years follow-up                                                                                | Alrabiah M.; Alrahlah A.; Al-Hamdan R.S.; Al-Aali K.A.; Labban N.; Abduljabbar T.                                                                                                                                                             | 2019 |
| Comparison of clinical peri-implant indices and crestal bone levels around narrow and regular diameter implants placed in diabetic and non-diabetic patients: A 3-year follow-up study    | Al-Shibani N.; Al-Aali K.A.; Al-Hamdan R.S.; Alrabiah M.; Basunbul G.; Abduljabbar T.                                                                                                                                                         | 2019 |
| Systemic Risk Factors for the Development of Periimplant Diseases                                                                                                                         | Kumar P.S.                                                                                                                                                                                                                                    | 2019 |
| Crestal Bone Loss Around Submerged and Non-Submerged Dental Implants in Individuals with Type-2 Diabetes Mellitus: A 7-Year Prospective Clinical Study                                    | Al Zahrani S.; Al Mutairi A.A.                                                                                                                                                                                                                | 2019 |
| Soft-Tissue Management as Part of the Surgical Treatment of Periimplantitis: A Narrative Review                                                                                           | Sculean A.; Romanos G.; Schwarz F.; Ramanauskaite A.; Leander K.P.; Khoury F.; Koo K.-T.; Cosgarea R.                                                                                                                                         | 2019 |
| Squamous cell carcinoma around a dental implant: A case report and literature review                                                                                                      | Malthiéry E.; De Boutray M.; Koren C.; Albouy J.-P.; Torres J.-H.; Fauroux M.-A.                                                                                                                                                              | 2019 |
| Treatment Planning for Periimplant Mucositis and Periimplantitis                                                                                                                          | Polyzois I.                                                                                                                                                                                                                                   | 2019 |

|                                                                                                                                                                                                    |                                                                                                                |      |
|----------------------------------------------------------------------------------------------------------------------------------------------------------------------------------------------------|----------------------------------------------------------------------------------------------------------------|------|
| Short implants (5-8 mm) vs. long implants in augmented bone and their impact on peri-implant bone in maxilla and/or mandible: Systematic review                                                    | Amine M.; Guelzim Y.; Benfaida S.; Bennani A.; Andoh A.                                                        | 2019 |
| Biomechanical analysis of 4 types of short dental implants in a resorbed mandible                                                                                                                  | Lee H.; Park S.; Noh G.                                                                                        | 2019 |
| Marginal bone response of submerged and non-submerged osteoconductive alkali-etched implants in thick and thin biotypes: A 2-year clinical follow-up study                                         | Novák Z.; Strnad J.; Nesvadba R.; Kamprle J.; Strnad Z.                                                        | 2019 |
| Maintenance of Implant Patients: A Narrative Review                                                                                                                                                | Kelekis-Cholakakis A.; Rothney J.                                                                              | 2019 |
| Implant vs abutment level connection in implant supported screw-retained fixed partial dentures with cobalt-chrome framework: 1-year interim results of a randomized clinical study                | Toia M.; Stocchero M.; Becktor J.P.; Chrcanovic B.; Wennerberg A.                                              | 2019 |
| Implant Surface Decontamination by Surgical Treatment of Periimplantitis: A Literature Review                                                                                                      | Koo K.-T.; Khoury F.; Leander Kieve P.; Schwarz F.; Ramanauskaitė A.; Sculean A.; Romanos G.                   | 2019 |
| Immediate implant placement following 1-year treatment with oral versus intravenous bisphosphonates: a histomorphometric canine study on peri-implant bone                                         | Khojasteh A.; Dehghan M.M.; Nazeman P.                                                                         | 2019 |
| MicroRNA-29a-3p regulates osteoblast differentiation and peri-implant osseointegration in a rat model of hyperlipidemia by modulating Frizzled 4 expression                                        | Liu F.; Wang Z.-F.; Liu F.-F.; Xu J.-Z.; Liu Q.; Lan J.                                                        | 2019 |
| The Effect of Left Ventricular Assist Devices (LVAD) on Pulmonary Hypertension: A Single Center Review                                                                                             | Tremblay P.L.; Stewart S.A.; Baskett R.J.                                                                      | 2019 |
| Opportunities for mechanistic studies of stroke in collaboration with the Cardiothoracic Surgical Trials Network                                                                                   | Kirkwood K.A.; Messe S.R.; Taylor D.A.                                                                         | 2019 |
| Comparison of treatment of medium-sized renal stones in terms of cost effectiveness                                                                                                                | Soares D.; Berman I.; Paul E.; Shahbaz S.; McCahy P.                                                           | 2019 |
| Presence of Candida species in the subgingival oral biofilm of patients with peri-implantitis                                                                                                      | Alrabiah M.; Alshagroud R.S.; Alsahhaf A.; Almojaly S.A.; Abduljabbar T.; Javed F.                             | 2019 |
| A 5-year longitudinal cohort study on crown to implant ratio effect on marginal bone level in single implants                                                                                      | Ramaglia L.; Di Spirito F.; Sirignano M.; La Rocca M.; Esposito U.; Sbordone L.                                | 2019 |
| Longitudinal assessment of clinical and radiographic periimplant status around narrow and regular diameter implants placed in cigarette-smokers and nonsmokers                                     | Alasqah M.N.; Alfawaz Y.F.; Aldahiyan N.; Vohra F.; Alotaibi B.M.; Abduljabbar T.                              | 2019 |
| Impaired osseointegration of dental implants associated with orthognathic surgery: Possible regional acceleratory phenomenon                                                                       | Kim J.-W.; Kim H.-Y.; Kim S.-Y.; Kim S.-J.                                                                     | 2019 |
| Soft tissue status and crestal bone loss around conventionally-loaded dental implants placed in cigarette- and waterpipe (narghile) smokers: 8-years' follow-up results                            | Alahmari F.; Javed F.; Ahmed Z.U.; Romanos G.E.; Al-Kheraif A.A.                                               | 2019 |
| Hydroxyl radicals generated by hydrogen peroxide photolysis recondition biofilm-contaminated titanium surfaces for subsequent osteoblastic cell proliferation                                      | Nakamura K.; Shirato M.; Tenkumo T.; Kanno T.; Westerlund A.; Örtengren U.; Sasaki K.; Niwano Y.               | 2019 |
| Clinical performance of tooth- or implant-supported veneered zirconia single crowns: 42-month results                                                                                              | Cantner F.; Cacaci C.; Mücke T.; Randelzhofer P.; Hajtó J.; Beuer F.                                           | 2019 |
| Interproximal contact loss in a retrospective cross-sectional study of 4325 implants: Distribution and incidence and the effect on bone loss and peri-implant soft tissue                          | French D.; Naito M.; Linke B.                                                                                  | 2019 |
| Influence on peri-implant bone loss of different fixed partial dentures retained on 2 implants                                                                                                     | Solá-Ruiz M.F.; Martí-Martí B.; Rech-Ortega C.; Fernández-Estevan L.; Agustín-Panadero R.                      | 2019 |
| HOSTILE TRICUSPID VALVE OVERCOME BY SELECTING THE MIDDLE CARDIAC VEIN: AN ALTERNATIVE FOR THE STANDARD RIGHT VENTRICULAR LEAD PLACEMENT OF BIVENTRICULAR ICD                                       | Mando R.; Akoegbe G.; Shah R.; Malas H.; Maskoun W.                                                            | 2019 |
| Prescribing trends of systemic antibiotics by periodontists in Australia                                                                                                                           | Ong A.; Kim J.; Loo S.; Quaranta A.; Rincon A J.C.                                                             | 2019 |
| Oculo-facio-cardio-dental syndrome: A case report about a rare pathological condition                                                                                                              | Martinho J.; Ferreira H.; Paulo S.; Paula A.; Marto C.-M.; Carrilho E.; Marques-Ferreira M.                    | 2019 |
| The amount of keratinized mucosa may not influence peri-implant health in compliant patients: A retrospective 5-year analysis                                                                      | Lim H.-C.; Wiedemeier D.B.; Hämmerle C.H.F.; Thoma D.S.                                                        | 2019 |
| Screw-retained monolithic zirconia vs. cemented porcelain-fused-to-metal implant crowns: a prospective randomized clinical trial in split-mouth design                                             | Weigl P.; Saarepera K.; Hinrikus K.; Wu Y.; Trimpou G.; Lorenz J.                                              | 2019 |
| Ten years follow-up retrospective study on implant survival rates and prevalence of peri-implantitis in implant-supported full-arch rehabilitations                                                | Francetti L.; Cavalli N.; Taschieri S.; Corbella S.                                                            | 2019 |
| Does Apico-Coronal Implant Position Influence Peri-Implant Marginal Bone Loss? A 36-Month Follow-Up Randomized Clinical Trial                                                                      | Pellicer-Chover H.; Peñarrocha-Diago M.; Aloy-Prosper A.; Canullo L.; Peñarrocha-Diago M.; Peñarrocha-Oltra D. | 2019 |
| Ethical and legal aspects in periodontal disease diagnosis and therapy                                                                                                                             | Voinescu I.; Ferechide D.; Cristache C.M.; Burlibasa L.; Burlibasa M.                                          | 2019 |
| Clinical evaluation of full-arch screw-retained implant-supported fixed prostheses and full-arch telescopic-retained implant-supported fixed prostheses: A 5-12 year follow-up retrospective study | Mori G.; Oda Y.; Sakamoto K.; Ito T.; Yajima Y.                                                                | 2019 |
| Peri-implant soft tissue status and crestal bone levels around adjacent implants placed in cigarette smokers and never smokers: Five-year follow-up results                                        | ArRejaie A.S.; Al-Aali K.A.; Alrabiah M.; Mokeem S.A.; Vohra F.; Abduljabbar T.                                | 2019 |
| Clinical and patient-reported outcomes of implants placed in autogenous bone grafts and implants placed in native bone: A case-control study with a follow-up of 5-16 years                        | Thoma D.S.; Maggetti I.; Waller T.; Hämmerle C.H.F.; Jung R.E.                                                 | 2019 |

|                                                                                                                                                                                                                                                                         |                                                                                                                                                               |      |
|-------------------------------------------------------------------------------------------------------------------------------------------------------------------------------------------------------------------------------------------------------------------------|---------------------------------------------------------------------------------------------------------------------------------------------------------------|------|
| The Role of Implant-Tooth Distance on Marginal Bone Levels and Esthetics                                                                                                                                                                                                | Wang T.; De Kok I.J.; Zhong S.; Vo C.; Mendonça G.; Nares S.; Cooper L.F.                                                                                     | 2019 |
| Retrospective analysis of porous tantalum trabecular metal-enhanced titanium dental implants                                                                                                                                                                            | Edelmann A.R.; Patel D.; Allen R.K.; Gibson C.J.; Best A.M.; Bencharit S.                                                                                     | 2019 |
| A randomized, controlled, clinical study on a new titanium oxide abutment surface for improved healing and soft tissue health                                                                                                                                           | Hall J.; Neilands J.; Davies J.R.; Ekestubbe A.; Friberg B.                                                                                                   | 2019 |
| Bone Regeneration of Canine Peri-implant Defects Using Cell Sheets of Adipose-Derived Mesenchymal Stem Cells and Platelet-Rich Fibrin Membranes                                                                                                                         | Ding L.; Tang S.; Liang P.; Wang C.; Zhou P.-F.; Zheng L.                                                                                                     | 2019 |
| Topographic characterization of multispecies biofilms growing on dental implant surfaces: An in vitro model                                                                                                                                                             | Bermejo P.; Sánchez M.C.; Llama-Palacios A.; Figuero E.; Herrera D.; Sanz M.                                                                                  | 2019 |
| Biomechanical aspects of reinforced implant overdentures: A systematic review                                                                                                                                                                                           | Gibreel M.F.; Khalifa A.; Said M.M.; Mahanna F.; El-Amier N.; Närhi T.O.; Perea-Lowery L.; Vallittu P.K.                                                      | 2019 |
| Rare diseases with periodontal manifestations                                                                                                                                                                                                                           | Hanisch M.; Hoffmann T.; Böhner L.; Hanisch L.; Benz K.; Kleinheinz J.; Jackowski J.                                                                          | 2019 |
| Basic structural features of a cardiac telemedicine center for patients with heart failure and implanted devices, cardiac arrhythmias, and increased risk of sudden cardiac death: Recommendations of the working group 33 Telemonitoring of the German Cardiac Society | Helms T.M.; Stockburger M.; Köhler F.; Leonhardt V.; Müller A.; Rybak K.; Sack S.; Schwab J.O.; Störk S.; Zippel-Schultz B.; Perings C.A.                     | 2019 |
| Mid-term Results of a Novel Dedicated Venous Stent for the Treatment of Chronic Thoracic Central Vein Obstruction of Benign Aetiology                                                                                                                                   | Tan G.M.; Chi K.W.K.; Yan B.P.Y.                                                                                                                              | 2019 |
| Impact of morbid obesity (BMI > 40 kg/m2) on complication rate and outcome following minimally invasive transforaminal lumbar interbody fusion (MIS TLIF)                                                                                                               | Krüger M.T.; Naseri Y.; Hohenhaus M.; Hubbe U.; Scholz C.; Klingler J.-H.                                                                                     | 2019 |
| Bariatric surgery for severe type 2 diabetes-really a lost cause?                                                                                                                                                                                                       | McGlone E.R.; Carey I.; Leonard C.; Velickovic V.; Le Roux C.; Batterham R.; Small P.; Khan O.                                                                | 2019 |
| Paclitaxel-Eluting Stents in the Superficial Femoral Artery at 12-Month Follow-Up Are Associated With Persistent Inflammation                                                                                                                                           | Shaar M.; Lendel V.; Hoyt T.; Marmagkiolis K.; Ates I.; Mego D.; Paixao A.; Park J.; Mcelroy A.; Dijkstra J.; Avci R.; Milner T.; Feldman M.; Cilingeroglu M. | 2019 |
| Dental Implant Rehabilitation After Jaw Reconstruction Assisted by Virtual Surgical Planning                                                                                                                                                                            | Zhu H.; Zhang L.; Cai Z.; Shan X.                                                                                                                             | 2019 |
| Oral hygiene maintenance of locator attachments implant overdentures in edentulous population: A longitudinal study                                                                                                                                                     | Liu X.Q.; Chen Q.W.; Feng H.L.; Wang B.; Qu J.; Sun Z.; Heng M.D.; Pan S.X.                                                                                   | 2019 |
| Research progress of dental implant in patients with oral lichen planus                                                                                                                                                                                                 | Fu L.; A L.; Li C.Y.; Zhou Y.M.                                                                                                                               | 2019 |
| Clinical indices and local levels of inflammatory biomarkers in peri-implant health of obese and nonobese individuals                                                                                                                                                   | Alasqah M.N.; Al-Shibani N.; Al-Aali K.A.; Qutub O.A.; Abduljabbar T.; Akram Z.                                                                               | 2019 |
| Evaluation of 0.2% delmopinol mouth rinse for prevention of peri-implant mucositis and peri-implantitis: A randomized controlled canine study                                                                                                                           | Levin L.; Barbu H.; Kurgan S.; Comăneanu R.M.; Referendaru D.; Lorean A.                                                                                      | 2019 |
| Prevalence of peri-implant disease and risk indicators in a Japanese population with at least 3 years in function-A multicentre retrospective study                                                                                                                     | Wada M.; Mameno T.; Onodera Y.; Matsuda H.; Daimon K.; Ikebe K.                                                                                               | 2019 |
| Implant health and factors affecting peri-implant marginal bone alteration for implants placed in staged maxillary sinus augmentation: A 5-year prospective study                                                                                                       | Krennmair S.; Hunger S.; Forstner T.; Malek M.; Krennmair G.; Stimmelmayer M.                                                                                 | 2019 |
| Use of TiBrush for surface decontamination at peri-implantitis sites in dogs: Radiographic and histological outcomes                                                                                                                                                    | Viganò P.; Apaza Alccayhuaman K.A.; Sakuma S.; Amari Y.; Bengazi F.; Botticelli D.                                                                            | 2019 |
| Understanding peri-implantitis as a plaque-associated and site-specific entity: On the local predisposing factors                                                                                                                                                       | Monje A.; Insua A.; Wang H.-L.                                                                                                                                | 2019 |
| A peri-implant disease risk score for patients with dental implants: Validation and the influence of the interval between maintenance appointments                                                                                                                      | De Araújo Nobre M.; Salvado F.; Nogueira P.; Rocha E.; Ilg P.; Maló P.                                                                                        | 2019 |
| Influence of restorative margins position on one-stage laser-microgrooved implants-supported single screwed crowns: A clinical, biochemical, and microbiological analysis                                                                                               | Guarnieri R.; Di Nardo D.; Gaimari G.; Miccoli G.; Testarelli L.                                                                                              | 2019 |
| TREATMENT OF CROHN'S DISEASE AND ULCERATIVE COLITIS WITH PROTON PUMP INHIBITORS: EFFECT ON BONE LOSS AT DENTAL IMPLANTS                                                                                                                                                 | Ursomanno B.L.; Cohen R.E.; Levine M.J.; Yerge L.M.                                                                                                           | 2019 |
| On inflammation-immunological balance theory-A critical apprehension of disease concepts around implants: Mucositis and marginal bone loss may represent normal conditions and not necessarily a state of disease                                                       | Albrektsson T.; Jemt T.; Mölne J.; Tengvall P.; Wennerberg A.                                                                                                 | 2019 |
| Effects of commensal biofilms on a peri-implant mucosa in a three dimensional model                                                                                                                                                                                     | Mikolai C.; Ingendoh-Tsakmakidis A.; Winkel A.; Kommerein N.; Falk C.S.; Rossi A.; Walles H.; Stiesch M.                                                      | 2019 |
| Clinical and radiographic peri-implant variables around short dental implants in type 2 diabetic, prediabetic, and non-diabetic patients                                                                                                                                | Mokeem S.; Alfadda S.A.; Al-Shibani N.; Alrabiah M.; Al-Hamdan R.S.; Vohra F.; Abduljabbar T.                                                                 | 2019 |
| In Vitro Evaluation of Cell Compatibility of Dental Cements Used with Titanium Implant Components                                                                                                                                                                       | Marvin J.C.; Gallegos S.I.; Parsaei S.; Rodrigues D.C.                                                                                                        | 2019 |
| Research on implants and osseointegration                                                                                                                                                                                                                               | Guglielmotti M.B.; Olmedo D.G.; Cabrini R.L.                                                                                                                  | 2019 |
| Extra-Sinus Zygomatic Implants to Avoid Chronic Sinusitis and Prosthetic Arch Malposition: 12 Years of Experience                                                                                                                                                       | Aleksandrowicz P.; Kusa-Podkańska M.; Grabowska K.; Kotuła L.; Szkatuła-Lupina A.; Wysokińska-Miszczuk J.                                                     | 2019 |
| Treatment of peri-implant recession with a screw-retained, interim implant restoration: A clinical report                                                                                                                                                               | Schoenbaum T.R.; Solnit G.S.; Alawie S.; Sadowsky S.J.                                                                                                        | 2019 |
| Periodic Assessment of Peri-implant Tissue Changes: Imperative for Implant Success                                                                                                                                                                                      | Rahman S.A.; Muhammad H.; Haque S.; Alam M.K.                                                                                                                 | 2019 |

|                                                                                                                                                                         |                                                                                                                                                        |      |
|-------------------------------------------------------------------------------------------------------------------------------------------------------------------------|--------------------------------------------------------------------------------------------------------------------------------------------------------|------|
| Clinical Success of Dental Implants Placed in Posterior Mandible Augmented With Interpositional Block Graft: 3-Year Results From a Prospective Cohort Clinical Study    | Marconcini S.; Covani U.; Giammarinaro E.; Velasco-Ortega E.; De Santis D.; Alfonsi F.; Barone A.                                                      | 2019 |
| Evaluation of Immediate Implants Augmented with Autogenous Bone/Melatonin Composite Graft in the Esthetic Zone: A Randomized Controlled Trial                           | Hazzaa H.H.A.; El-Kilani N.S.; Elsayed S.A.-E.; Abd El Massieh P.M.                                                                                    | 2019 |
| Relationship Between Crestal Bone Levels and Crown-to-Implant Ratio of Ultra-Short Implants With a Microrough Surface: A Prospective Study With 48 Months of Follow-Up  | Malchiodi L.; Giacomazzi E.; Cucchi A.; Ricciotti G.; Caricasulo R.; Bertossi D.; Gherlone E.                                                          | 2019 |
| Short vs. Standard Laser-Microgrooved Implants Supporting Single and Splinted Crowns: A Prospective Study with 3 Years Follow-Up                                        | Guarnieri R.; Di Nardo D.; Gaimari G.; Miccoli G.; Testarelli L.                                                                                       | 2019 |
| The Conometric Concept: A Two-Year Follow-Up of Fixed Partial CEREC Restorations Supported By Cone-In-Cone Abutments                                                    | Degidi M.; Nardi D.; Sighinolfi G.; Degidi D.; Piattelli A.                                                                                            | 2019 |
| Influence of pH on osteoclasts treated with zoledronate and alendronate                                                                                                 | Manzano-Moreno F.J.; Ramos-Torrecillas J.; de Luna-Bertos E.; Illescas-Montes R.; Arnett T.R.; Ruiz C.; Garcia-Martínez O.                             | 2019 |
| Innovative biomaterials for bone regrowth                                                                                                                               | Iaquinta M.R.; Mazzoni E.; Manfrini M.; D'Agostino A.; Trevisiol L.; Nocini R.; Trombelli L.; Barbanti-Brodano G.; Martini F.; Tognon M.               | 2019 |
| PEEK materials as an alternative to titanium in dental implants: A systematic review                                                                                    | Mishra S.; Chowdhary R.                                                                                                                                | 2019 |
| Effect of Implant Position on Clinical and Radiographic Outcomes of Locator-Retained Mandibular Overdentures: A 1-Year Prospective Study                                | ELsyad M.A.; Maryod W.H.; Mostafa A.Z.                                                                                                                 | 2019 |
| Maintenance therapy for teeth and implants                                                                                                                              | Mombelli A.                                                                                                                                            | 2019 |
| Changes in pulmonary artery pressure before and after left ventricular assist device implantation in patients utilizing remote haemodynamic monitoring                  | Kilic A.; Katz J.N.; Joseph S.M.; Brisco-Bacik M.A.; Uriel N.; Lima B.; Agarwal R.; Bharmi R.; Farrar D.J.; Lee S.                                     | 2019 |
| NCCT and CTA-based imaging protocol for endovascular treatment selection in late presenting or wake-up strokes                                                          | Santos T.; Carvalho A.; Cunha A.A.; Rodrigues M.; Gregório T.; Paredes L.; Costa H.; Roriz J.M.; Pinho J.; Veloso M.; Castro S.; Barros P.; Ribeiro M. | 2019 |
| Intraluminal Thrombi in the Cervico-Cephalic Arteries                                                                                                                   | Singh R.-J.; Chakraborty D.; Dey S.; Ganesh A.; Al Sultan A.S.; Eesa M.; Wong J.H.; Goyal M.; Hill M.D.; Menon B.K.                                    | 2019 |
| Novel bioactive and therapeutic dental polymeric materials to inhibit periodontal pathogens and biofilms                                                                | Chi M.; Qi M.; Lan A.; Wang P.; Weir M.D.; Melo M.A.; Sun X.; Dong B.; Li C.; Wu J.; Wang L.; Xu H.H.K.                                                | 2019 |
| Early postoperative mortality similar between cemented and uncemented hip arthroplasty: a register study based on Finnish national data                                 | Ekman E.; Palomäki A.; Laaksonen I.; Peltola M.; Häkkinen U.; Mäkelä K.                                                                                | 2019 |
| An evaluation of the relationship between peri-implant soft tissue biotype and the severity of peri-implantitis: A cross-sectional study                                | Isler S.C.; Uraz A.; Kaymaz O.; Cetiner D.                                                                                                             | 2019 |
| Peri-implant Mucosal Tissues and Inflammation: Clinical implications                                                                                                    | Fiorellini J.P.; Luan K.W.; Chang Y.-C.; Minjoon Kim D.; Sarmiento H.L.                                                                                | 2019 |
| Influence of insertion torque on clinical and biological outcomes before and after loading of mandibular implant-retained overdentures in atrophic edentulous mandibles | Faot F.; Bielemann A.M.; Schuster A.J.; Marcello-Machado R.M.; Del Bel Cury A.A.; Nascimento G.G.; Chagas-Junior O.-L.L.                               | 2019 |
| The effects of annual maintenance on peri-implant health in patients rehabilitated with overdentures: A retrospective cohort study                                      | Roman-Torres C.V.G.; Pasquinelli F.; Pimentel A.C.; de Melo M.P.; Rego R.O.; Sendyk W.R.                                                               | 2019 |
| Midfacial tissue assessment of the effect of amount of keratinized mucosa on immediate temporarization of fresh socket implants: 8-year follow-up                       | Crespi R.; Capparé P.; Crespi G.; Gastaldi G.; Romanos G.E.; Gherlone E.                                                                               | 2019 |
| Etiology and measurement of peri-implant crestal bone loss (CBL)                                                                                                        | Naveau A.; Shinmyouzu K.; Moore C.; Avivi-Arber L.; Jokerst J.; Koka S.                                                                                | 2019 |
| Nonsurgical Management of Peri-implant Bone Loss Induced by Residual Cement: Retrospective Analysis of Six Cases                                                        | De Martinis Terra E.; Berardini M.; Trisi P.                                                                                                           | 2019 |
| Er:YAG and diode lasers in treatment of peri-implantitis—A case report                                                                                                  | Nikitas A.                                                                                                                                             | 2019 |
| Graftless sinus floor augmentation with an internal-port implant: Long-term experience                                                                                  | Nahlieli O.; Boiangiu A.; Abramson A.; Aba M.; Nahlieli D.D.; Srouji S.                                                                                | 2019 |
| Reuterinos® as adjuvant for peri-implant treatment: A pilot study                                                                                                       | Lauritano D.; Carinci F.; Palmieri A.; Cura F.; Caruso S.; Candotto V.                                                                                 | 2019 |
| Factors contributing to peri-implantitis - A practitioner's perspective                                                                                                 | Hemani K.; Ganapathy D.; Ramanathan V.                                                                                                                 | 2019 |
| Is there an association between overweight/obesity and dental implant complications? A systematic review and meta-analysis                                              | Monteiro J.L.G.C.; Pellizzer E.P.; Araújo Lemos C.A.; de Moraes S.L.D.; do Egito Vasconcelos B.C.                                                      | 2019 |
| Undesirable course of an oral implant rehabilitation in a patient with a long history of bulimia nervosa: Case report and review of the literature                      | Turhani D.; Ohlmeier K.H.; Sutter W.; Kielbassa A.M.                                                                                                   | 2019 |
| Three-year prospective randomized comparative assessment of anterior maxillary single implants with different abutment interfaces                                       | Cooper L.F.; Reside G.; Stanford C.; Barwacz C.; Feine J.; Nader S.A.; Scheyer T.; McGuire M.                                                          | 2019 |
| Evaluation of implant success in patients with dental aplasia                                                                                                           | Attia S.; Schaper E.; Schaaf H.; Pons-Kühnemann J.; Schlenz M.A.; Streckbein P.; Böttger S.; Howaldt H.-P.; Wilbrand J.-F.; Sartori M.                 | 2019 |
| Peri-implant Infection Concomitant with a Flare-up Episode of Chronic Periodontitis: An unusual regeneration following treatment and a 5-year follow-up                 | Tawil G.; Tawil P.                                                                                                                                     | 2019 |
| Periodontal bacterial supernatants modify differentiation, migration and inflammatory cytokine expression in human periodontal ligament stem cells                      | Ramenzoni L.L.; Russo G.; Moccia M.D.; Attin T.; Schmidlin P.R.                                                                                        | 2019 |
| Implant placement for patients with cleft lip and palate: A clinical report and guidelines for treatment                                                                | Pucciarelli M.G.R.; Lopes A.C.O.; Lopes J.F.S.; Soares S.                                                                                              | 2019 |



|                                                                                                                                                                                                                         |                                                                                                                                                                   |      |
|-------------------------------------------------------------------------------------------------------------------------------------------------------------------------------------------------------------------------|-------------------------------------------------------------------------------------------------------------------------------------------------------------------|------|
| Relationship between primary/mechanical and secondary/biological implant stability                                                                                                                                      | Monje A.; Ravidà A.; Wang H.-L.; Helms J.A.; Brunski J.B.                                                                                                         | 2019 |
| A double-crown concept for restorations in patients with generalized aggressive periodontitis: Two case reports with 22- and 25-year follow-ups                                                                         | Mengel R.; Peleska B.                                                                                                                                             | 2019 |
| Risk factors associated with short dental implant success: a long-term retrospective evaluation of patients followed up for up to 9 years                                                                               | Hasanoglu Erbasar G.N.; Hocaoglu T.P.; Erbasar R.C.                                                                                                               | 2019 |
| Impact of soft tissue grafts to reduce peri-implant alterations after immediate implant placement and provisionalization in compromised sockets                                                                         | Frizzera F.; Moreno De Freitas R.; Muñoz-Chávez O.F.; Cabral G.; Shibli J.A.; Marcantonio E.                                                                      | 2019 |
| Clinical and radiographic evaluation of early loaded maxillary anterior implants: Three-year follow-up                                                                                                                  | Kahramanoglu E.; Aslan Y.U.; Özkan Y.; Özkan Y.                                                                                                                   | 2019 |
| Onlay bone grafts from iliac crest: a retrospective analysis                                                                                                                                                            | Sethi A.; Kaus T.; Cawood J.I.; Plaha H.; Boscoe M.; Sochor P.                                                                                                    | 2019 |
| Esthetic and functional rehabilitation of bilateral congenital absence of maxillary lateral incisors: Minimally invasive surgical and prosthetic approach                                                               | Ruales-Carrera E.; Engler M.L.P.D.; Vaz P.; Özcan M.; Volpato C.A.M.                                                                                              | 2019 |
| Titanium dental implants with different collar design and surface modifications: A systematic review on survival rates and marginal bone levels                                                                         | Messias A.; Nicolau P.; Guerra F.                                                                                                                                 | 2019 |
| Immediate dental implant placement in calvarial bone grafts to rehabilitate the severely resorbed edentulous maxilla: A prospective pilot study                                                                         | Putters T.F.; Raghoobar G.M.; Klein-Nulend J.; Vissink A.; Schortinghuis J.                                                                                       | 2019 |
| Comparison of Three Different Types of Two-Implant-Supported Magnetic Attachments on the Stress Distribution in Edentulous Mandible                                                                                     | Hu F.; Gong Y.; Bian Z.; Zhang X.; Xu B.; Zhang J.; Shi X.; Yu Y.; Song L.                                                                                        | 2019 |
| Long-term results of endosseous implants as retention elements of orbital epitheses, reconstruction techniques, and aftercare following radical tumor resection                                                         | Baum S.H.; Klein M.; Mohr C.; Weischer T.                                                                                                                         | 2019 |
| Breast implant-associated anaplastic large cell lymphoma: Clinical and imaging findings at a large US cancer center                                                                                                     | Dashevsky B.Z.; Gallagher K.M.; Grabenstetter A.; Cordeiro P.G.; Dogan A.; Morris E.A.; Horwitz S.M.; Sutton E.J.                                                 | 2019 |
| Safe hydration to prevent contrast-induced acute kidney injury and worsening heart failure in patients with renal insufficiency and heart failure undergoing coronary angiography or percutaneous coronary intervention | Bei W.-J.; Wang K.; Li H.-L.; Guo X.-S.; Guo W.; Abuduaini T.; Chen S.-Q.; Islam S.M.S.; Chen P.-Y.; Chen J.-Y.; Liu Y.; Tan N.                                   | 2019 |
| Plate-on-plate technique for treating peri-implant fractures of distal femoral locking plate: a retrospective study of 11 patients                                                                                      | Ma C.-H.; Chiu Y.-C.; Wu C.-H.; Tsai K.-L.; Wen T.-K.; Jou I.-M.; Tu Y.-K.                                                                                        | 2019 |
| Resveratrol reverses the negative effect of smoking on peri-implant repair in the tibia of rats                                                                                                                         | Ribeiro F.V.; Pimentel S.P.; Corrêa M.G.; Bortoli J.P.; Messoria M.R.; Casati M.Z.                                                                                | 2019 |
| A novel perspective for predicting gingival biotype via dentopapillary measurements on study models in the Saudi population: Cross-sectional study                                                                      | Nagate R.R.; Tikare S.; Chaturvedi S.; AlQahtani N.A.; Kader M.A.; Gokhale S.T.                                                                                   | 2019 |
| Is the time to revision surgery after peri-prosthetic fracture of the knee associated with increased rates of post-operative complications?                                                                             | Boddapati V.; Held M.B.; Lee N.J.; Geller J.A.; Cooper H.J.; Shah R.P.                                                                                            | 2019 |
| Totally endoscopic ventricular septal defect repair using bilateral femoral arterial cannulation in an 8-year-old girl                                                                                                  | Dang H.Q.; Le H.T.                                                                                                                                                | 2019 |
| Safety, efficacy, and removability of a fully covered multi-hole metal stent in a swine model of hilar biliary stricture: A feasibility study                                                                           | Park J.-S.; Jeong S.; Kobayashi M.; Lee D.H.                                                                                                                      | 2019 |
| Feasibility and safety of left atrial appendage closure using the lambre device in patients with nonvalvular atrial fibrillation with or without prior catheter ablation: A single centre experience                    | Feng X.-F.; Zhang P.-P.; Sun J.; Wang Q.-S.; Li Y.-G.                                                                                                             | 2019 |
| Saphenous vein graft sacrifice following native vessel PCI is safe and associated with favourable longer-term outcomes                                                                                                  | Wilson S.J.; Hanratty C.G.; Spence M.S.; Owens C.G.; Rigger J.; Spratt J.C.; Walsh S.J.                                                                           | 2019 |
| Second generation drug-eluting stents for endovascular treatment of ostial vertebral artery stenosis: A single center experience                                                                                        | Ortega-Gutierrez S.; Lopez G.V.; Edgell R.C.; Mendez A.A.; Dandapat S.; Roa J.A.; Zevallos C.B.; Holcombe A.L.; Hasan D.; Derdeyn C.P.; Rossen J.; Samaniego E.A. | 2019 |
| Percutaneous Left Atrial Appendage Closure: Single Centre Experience using Three Different Devices                                                                                                                      | Iwai S.; Worthley S.; Sanders P.; Young G.                                                                                                                        | 2019 |
| Left atrial appendage closure. Monocentric registry of the first 100 cases: Indications, peri-operative anticoagulation strategies, complications and follow-up                                                         | Roux J.; Granier M.; Massin F.; Cade S.; Pasquié J.L.                                                                                                             | 2019 |
| Estimation of the diagnostic accuracy of clinical parameters for monitoring peri-implantitis progression: An experimental canine study                                                                                  | Monje A.; Insua A.; Rakic M.; Nart J.; Moyano-Cuevas J.L.; Wang H.-L.                                                                                             | 2018 |
| Could the biomarker levels in saliva help distinguish between healthy implants and implants with peri-implant disease? A systematic review                                                                              | Gomes A.M.; Douglas-de-Oliveira D.W.; Oliveira Costa F.                                                                                                           | 2018 |
| A two-piece dental implant comprising a replaceable thin titanium sleeve may be a new approach to re-osseointegration following peri-implant disease                                                                    | Liat C.; Roni S.; Adir G.; Gavriel C.                                                                                                                             | 2018 |
| Survival rates of hybrid rough surface implants and their alveolar bone level alterations                                                                                                                               | Lee C.-T.; Tran D.; Jeng M.-D.; Shen Y.-T.                                                                                                                        | 2018 |
| Periodontitis as a risk factor for peri-implantitis: Systematic review and meta-analysis of observational studies                                                                                                       | Ferreira S.D.; Martins C.C.; Amaral S.A.; Vieira T.R.; Albuquerque B.N.; Cota L.O.M.; Esteves Lima R.P.; Costa F.O.                                               | 2018 |
| Impact of jaw location on clinical and radiological status of dental implants placed in cigarette-smokers and never-smokers: 5-year follow-up results                                                                   | Al-Aali K.A.; Alrabiah M.; Al-Hamdan R.S.; Al-Hamoudi N.; Aldahian N.; Abduljabbar T.                                                                             | 2018 |
| Peri-implant inflammation and marginal bone level changes around dental implants in relation to proximity with and bone level of adjacent teeth                                                                         | Ng K.T.; Fan M.; Leung M.C.; Fokas G.; Mattheos N.                                                                                                                | 2018 |

|                                                                                                                                                                               |                                                                                                                                                                                                                                                                                                                                 |      |
|-------------------------------------------------------------------------------------------------------------------------------------------------------------------------------|---------------------------------------------------------------------------------------------------------------------------------------------------------------------------------------------------------------------------------------------------------------------------------------------------------------------------------|------|
| Randomized controlled clinical study of veneered zirconia abutments for single implant crowns: Clinical, histological, and microbiological outcomes                           | Thoma D.S.; Sailer I.; Mühlemann S.; Gil A.; Jung R.E.; Hämmerle C.H.F.                                                                                                                                                                                                                                                         | 2018 |
| Long-term follow-up of single crowns supported by short, moderately rough implants-A prospective 10-year cohort study                                                         | Rossi F.; Lang N.P.; Ricci E.; Ferraioli L.; Baldi N.; Botticelli D.                                                                                                                                                                                                                                                            | 2018 |
| Comparing 4-mm dental implants to longer implants placed in augmented bones in the atrophic posterior mandibles: One-year results of a randomized controlled trial            | Rokn A.R.; Monzavi A.; Panjnoush M.; Hashemi H.M.; Kharazifard M.J.; Bitaraf T.                                                                                                                                                                                                                                                 | 2018 |
| Orthognathic surgery Deteriorates the osseointegration of dental implants: A propensity-matched multicentre cohort study                                                      | Kim J.-W.; Lee H.; Lim H.-K.; Kim J.-W.; Byun S.-H.; Choi Y.-J.; Lee U.-L.                                                                                                                                                                                                                                                      | 2018 |
| Single tooth implants in the esthetic zone following a two-stage all flapless approach: A retrospective analysis                                                              | Hingsammer L.; Pommer B.; Fürhauser R.; Mailath-Pokorny G.; Haas R.; Busenlechner D.                                                                                                                                                                                                                                            | 2018 |
| Antibiofilm peptides against biofilms on titanium and hydroxyapatite surfaces                                                                                                 | Wang D.; Haapasalo M.; Gao Y.; Ma J.; Shen Y.                                                                                                                                                                                                                                                                                   | 2018 |
| Early Healing of Immediate Implants Connected With Two Types of Healing Abutments: A Prospective Cohort Study                                                                 | Hu C.; Lin W.; Gong T.; Zuo Y.; Qu Y.; Man Y.                                                                                                                                                                                                                                                                                   | 2018 |
| Immediate Postextractive Implants With and Without Bone Graft: 3-year Follow-up Results From a Multicenter Controlled Randomized Trial                                        | Mastrangelo F.; Gastaldi G.; Vinci R.; Troiano G.; Tettamanti L.; Gherlone E.; Lo Muzio L.                                                                                                                                                                                                                                      | 2018 |
| Effect of Human Wnt10b Transgene Overexpression on Peri-Implant Osteogenesis in Ovariectomized Rats                                                                           | Liu H.; Zhang N.; Liu Y.; Liu L.; Yin G.; En L.                                                                                                                                                                                                                                                                                 | 2018 |
| Efficacy of an ethyl alcohol gel in symptomatic disc herniation                                                                                                               | Marcia S.; Bellini M.; Hirsch J.A.; Chandra R.V.; Piras E.; Marras M.; Sanna A.M.; Saba L.                                                                                                                                                                                                                                      | 2018 |
| Rivaroxaban or vitamin-K antagonists following early endovascular thrombus removal and stent placement for acute iliofemoral deep vein thrombosis                             | Sebastian T.; Hakki L.O.; Spirk D.; Baumann F.A.; Périard D.; Banyai M.; Spescha R.S.; Kucher N.; Engelberger R.P.                                                                                                                                                                                                              | 2018 |
| Mitral valve repair complicated by left circumflex coronary artery occlusion: An under-recognized but potentially deadly complication                                         | Ahmad T.A.; Nudy M.; Pabst D.; Kozak M.                                                                                                                                                                                                                                                                                         | 2018 |
| Transcatheter valve-in-valve versus redo surgical aortic valve replacement for the treatment of degenerated bioprosthetic aortic valve: A systematic review and meta-analysis | Tam D.Y.; Vo T.X.; Wijeyesundera H.C.; Dvir D.; Friedrich J.O.; Fremes S.E.                                                                                                                                                                                                                                                     | 2018 |
| Comparative Evaluation of Different Bone Markers in Peri-implant Crevicular Fluid of Immediate Loaded and Nonloaded Dental Implants                                           | Haque M.I.U.; Sharma P.; Tiwari A.; Subhas S.; Rana M.; Kumar V.                                                                                                                                                                                                                                                                | 2018 |
| Quercitrin nanocoated implant surfaces reduce osteoclast activity in vitro and in vivo                                                                                        | Córdoba A.; Manzanaro-Moreno N.; Colom C.; Rønold H.J.; Lyngstadaas S.P.; Monjo M.; Ramis J.M.                                                                                                                                                                                                                                  | 2018 |
| Prosthetic Complications Affecting Single-Tooth Morse-Taper Connection Implants                                                                                               | Mangano F.; Lucchina A.G.; Brucoli M.; Migliario M.; Mortellaro C.; Mangano C.                                                                                                                                                                                                                                                  | 2018 |
| Effect of curcumin on bone tissue in the diabetic rat: repair of peri-implant and critical-sized defects                                                                      | Cirano F.R.; Pimentel S.P.; Casati M.Z.; Corrêa M.G.; Pino D.S.; Messora M.R.; Silva P.H.F.; Ribeiro F.V.                                                                                                                                                                                                                       | 2018 |
| Straight and tilted implants for supporting screw-retained full-arch dental prostheses in atrophic maxillae: A 2-year prospective study                                       | Menéndez-Collar M.; Serrera-Figallo M.-A.; Hita-Iglesias P.; Castillo-Oyagüe R.; Casar-Espinosa J.-C.; Gutiérrez-Corrales A.; Gutiérrez-Perez J.-L.; Torres-Lagares D.                                                                                                                                                          | 2018 |
| Citation Network Analysis of Dental Implant Literature from 2007 to 2016                                                                                                      | Yeung A.W.K.; Leung W.K.                                                                                                                                                                                                                                                                                                        | 2018 |
| Survival Rate and Bone Resorption in Immediate Loading of Atrophic Maxillary Arches Using Normal and Long Implants: A Pilot Observational Study                               | Pesce P.; Pera F.; Bruno D.; Menini M.                                                                                                                                                                                                                                                                                          | 2018 |
| Zirconia dental implants: A clinical and radiographic evaluation                                                                                                              | Rodriguez A.E.; Monzavi M.; Yokoyama C.L.; Nowzari H.                                                                                                                                                                                                                                                                           | 2018 |
| Metal artifact reduction in virtual monoenergetic spectral dual-energy CT of patients with metallic orthopedic implants in the distal radius                                  | Yoo H.J.; Hong S.H.; Chung B.M.; Moon S.J.; Choi J.-Y.; Chae H.D.; Chang M.-Y.                                                                                                                                                                                                                                                  | 2018 |
| Evaluating the primary stability of standard vs lateralised cementless femoral stems – A finite element study using a diverse patient cohort                                  | Al-Dirini R.M.A.; Martelli S.; Huff D.; Zhang J.; Clement J.G.; Besier T.; Taylor M.                                                                                                                                                                                                                                            | 2018 |
| Efficacy of topical tranexamic acid within a blood-saving programme for primary total hip arthroplasty: A pragmatic, open-label randomised study                              | Pérez-Jimeno N.; Muñoz M.; Mateo J.; Mayoral A.P.; Herrera A.                                                                                                                                                                                                                                                                   | 2018 |
| Comparison of graded balloon atrial septostomy to continued medical therapy or novel interventional techniques in patients with advanced pulmonary arterial hypertension      | Khan M.S.; Sreenivasan J.; Memon M.M.; Amin E.; Ochani R.K.; Shaikh A.; Fatima K.; Asmi N.; Krasuski R.                                                                                                                                                                                                                         | 2018 |
| MicroRNA-29a-3p enhances dental implant osseointegration of hyperlipidemic rats via suppressing dishevelled 2 and frizzled 4                                                  | Liu F.; Wang Z.; Liu F.; Xu J.; Liu Q.; Yin K.; Lan J.                                                                                                                                                                                                                                                                          | 2018 |
| Group 4 ITI Consensus Report: Risks and biologic complications associated with implant dentistry                                                                              | Heitz-Mayfield L.J.; Aaboe M.; Araujo M.; Carrión J.B.; Cavalcanti R.; Cionca N.; Cochran D.; Darby I.; Funakoshi E.; Gierthmuehlen P.C.; Hashim D.; Jahangiri L.; Kwon Y.; Lambert F.; Layton D.M.; Lorenzana E.R.; McKenna G.; Mombelli A.; Müller F.; Roccuzzo M.; Salvi G.E.; Schimmel M.; Srinivasan M.; Tomasi C.; Yeo A. | 2018 |
| The diagnosis of peri-implantitis: A systematic review on the predictive value of bleeding on probing                                                                         | Hashim D.; Cionca N.; Combescure C.; Mombelli A.                                                                                                                                                                                                                                                                                | 2018 |
| Diagnostic accuracy of the implant stability quotient in monitoring progressive peri-implant bone loss: An experimental study in dogs                                         | Monje A.; Insua A.; Monje F.; Muñoz F.; Salvi G.E.; Buser D.; Chappuis V.                                                                                                                                                                                                                                                       | 2018 |
| How do peri-implant biologic parameters correspond with implant survival and peri-implantitis? A critical review                                                              | Doornewaard R.; Jacquet W.; Cosyn J.; De Bruyn H.                                                                                                                                                                                                                                                                               | 2018 |
| Comparison of clinical and radiographic peri-implant parameters among obese and non-obese patients: A 5-year study                                                            | Alkhudairy F.; Vohra F.; Al-Kheraif A.A.; Akram Z.                                                                                                                                                                                                                                                                              | 2018 |
| Biological aspects: Summary and consensus statements of group 2. The 5th EAO Consensus Conference 2018                                                                        | Sanz M.; Klinge B.; Alcoforado G.; Bienz S.P.; Cosyn J.; De Bruyn H.; Derks J.; Figuero E.; Gurbawska K.; Heitz-Mayfield L.; Jung R.E.; Ornekul T.; Sagado A.                                                                                                                                                                   | 2018 |
| Clinical outcomes of peri-implantitis treatment and supportive care: A systematic review                                                                                      | Roccuzzo M.; Layton D.M.; Roccuzzo A.; Heitz-Mayfield L.J.                                                                                                                                                                                                                                                                      | 2018 |

|                                                                                                                                                                                   |                                                                                                                                                                                   |      |
|-----------------------------------------------------------------------------------------------------------------------------------------------------------------------------------|-----------------------------------------------------------------------------------------------------------------------------------------------------------------------------------|------|
| Long-term clinical outcome of single implants inserted flaplessly or conventionally                                                                                               | Naeini E.N.; Dierens M.; Atashkadeh M.; De Bruyn H.                                                                                                                               | 2018 |
| Clinical and radiographic outcomes of a surgical reconstructive approach in the treatment of peri-implantitis lesions: A 5-year prospective case series                           | La Monaca G.; Pranno N.; Annibali S.; Cristalli M.P.; Polimeni A.                                                                                                                 | 2018 |
| Peri-implant diseases                                                                                                                                                             | Klinge B.; Klinge A.; Bertl K.; Stavropoulos A.                                                                                                                                   | 2018 |
| Surgical treatment of peri-implantitis lesions with or without the use of a bone substitute-a randomized clinical trial                                                           | Renvert S.; Roos-Jansäker A.-M.; Persson G.R.                                                                                                                                     | 2018 |
| Long-term biological complications of dental implants placed either in pristine or in augmented sites: A systematic review and meta-analysis                                      | Salvi G.E.; Monje A.; Tomasi C.                                                                                                                                                   | 2018 |
| Long-term results of osseointegrated implant-based dental rehabilitation in oncology patients reconstructed with a fibula free flap                                               | Pellegrino G.; Tarsitano A.; Ferri A.; Corinaldesi G.; Bianchi A.; Marchetti C.                                                                                                   | 2018 |
| The Association Between Buccal Mucosa Thickness and Periimplant Bone Loss and Attachment Loss: A Cross-Sectional Study                                                            | Mailoa J.; Arnett M.; Chan H.-L.; George F.M.; Kaigler D.; Wang H.-L.                                                                                                             | 2018 |
| Evaluation of peri-implant marginal tissues around tissue-level and bone-level implants in patients with a history of chronic periodontitis                                       | Vianna T.T.; Taiete T.; Casarin R.C.V.; Giorgi M.C.C.; Aguiar F.H.B.; Silvério K.G.; Nociti Júnior F.H.; Sallum E.A.; Casati M.Z.                                                 | 2018 |
| What is the impact of titanium particles and biocorrosion on implant survival and complications? A critical review                                                                | Mombelli A.; Hashim D.; Cionca N.                                                                                                                                                 | 2018 |
| Impact of dental cement on the peri-implant biofilm-microbial comparison of two different cements in an in vivo observational study                                               | Korsch M.; Marten S.-M.; Walther W.; Vital M.; Pieper D.H.; Dötsch A.                                                                                                             | 2018 |
| Dental implants - are they better than natural teeth?                                                                                                                             | Pjetursson B.E.; Heimisdottir K.                                                                                                                                                  | 2018 |
| Biological effect of the abutment material on the stability of peri-implant marginal bone levels: A systematic review and meta-analysis                                           | Sanz-Sánchez I.; Sanz-Martín I.; Carrillo de Albornoz A.; Figuero E.; Sanz M.                                                                                                     | 2018 |
| Survival of dental implants placed in HIV-positive patients: a systematic review                                                                                                  | Lemos C.A.A.; Verri F.R.; Cruz R.S.; Santiago Júnior J.F.; Faverani L.P.; Pellizzer E.P.                                                                                          | 2018 |
| A randomized controlled clinical trial assessing initial crestal bone remodeling of implants with a different surface roughness                                                   | Glibert M.; Matthys C.; Maat R.-J.; De Bruyn H.; Vervaeke S.                                                                                                                      | 2018 |
| Is there an effect of crown-to-implant ratio on implant treatment outcomes? A systematic review                                                                                   | Meijer H.J.A.; Boven C.; Delli K.; Raghoobar G.M.                                                                                                                                 | 2018 |
| Implant rehabilitation of the edentulous jaws: Does tilting of posterior implants at an angle greater than 45° affect bone resorption and implant success?: A retrospective study | Malchiodi L.; Moro T.; Cattina D.P.; Cucchi A.; Ghensi P.; Nocini P.F.                                                                                                            | 2018 |
| The prosthetic abutment height can affect marginal bone loss around dental implants                                                                                               | Lee B.-A.; Kim B.-H.; Kweon H.H.I.; Kim Y.-T.                                                                                                                                     | 2018 |
| Sub-periosteal peri-implant augmented layer technique for horizontal bone augmentation at implant placement                                                                       | Trombelli L.; Severi M.; Pramstraller M.; Farina R.                                                                                                                               | 2018 |
| Performance and outcome of zirconia dental implants in clinical studies: A meta-analysis                                                                                          | Roehling S.; Schlegel K.A.; Woelfler H.; Gahlert M.                                                                                                                               | 2018 |
| Histological and micro-CT analysis of peri-implant soft and hard tissue healing on implants with different healing abutments configurations                                       | Souza A.B.; Alshihri A.; Kämmerer P.W.; Araújo M.G.; Gallucci G.O.                                                                                                                | 2018 |
| Five-year cohort prospective study on single implants in the esthetic area restored using one-abutment/one-time prosthetic approach                                               | Canullo L.; Omori Y.; Amari Y.; Iannello G.; Pesce P.                                                                                                                             | 2018 |
| The use of platelet-rich fibrin to enhance the outcomes of implant therapy: A systematic review                                                                                   | Strauss F.J.; Stähli A.; Gruber R.                                                                                                                                                | 2018 |
| Retrospective radiographic observational study of 1692 Straumann tissue-level dental implants over 10 years. II. Marginal bone stability                                          | Kang M.-H.; Jung U.-W.; Cho K.-S.; Lee J.-S.                                                                                                                                      | 2018 |
| The influence of local delivery of bisphosphonate on osseointegration of dental implants                                                                                          | Khamis A.K.; Elsharkawy S.                                                                                                                                                        | 2018 |
| Biological and technical complications of tilted implants in comparison with straight implants supporting fixed dental prostheses. A systematic review and meta-analysis          | Apaza Alccayhuaman K.A.; Soto-Peñaloza D.; Nakajima Y.; Papageorgiou S.N.; Botticelli D.; Lang N.P.                                                                               | 2018 |
| Efficacy of carotid artery stenting on stroke prevention of octogenarians                                                                                                         | Mohammadian R.; Sharifipour E.; Taheraghdam A.; Mansourizadeh R.; Altafi D.; Fattahzadeh G.; Sariaslani P.; Yousefshahi P.; Ebrahimzadeh K.; Vahedian M.; Golzari S.E.J.          | 2018 |
| Extracting infected cardiac implantable electronic devices, a significant healthcare cost                                                                                         | Brough C.E.P.; Wright D.J.                                                                                                                                                        | 2018 |
| Eus-guided pancreatic drainage: A steep learning curve                                                                                                                            | Tyberg A.; Kedia P.; Tarnasky P.; Ali Khan M.; Novikov A.; Shah S.; Gaidhane M.; Ardengh J.C.; Kahaleh M.                                                                         | 2018 |
| Upgrades from a previous device compared to de novo cardiac resynchronization therapy in the European Society of Cardiology CRT Survey II                                         | Linde C.M.; Normand C.; Bogale N.; Auricchio A.; Sterlinski M.; Marinkis G.; Sticherling C.; Bulava A.; Pérez Ó.C.; Maass A.H.; Witte K.K.; Rekvava R.; Abdelali S.; Dickstein K. | 2018 |
| Impact of peri-procedural and technical factors and patient characteristics on revascularization and clinical outcome in dawn trial                                               | Tekle W.; Hassan A.; Jadhav A.; Liebeskind D.; Jovin T.; Nogueira R.                                                                                                              | 2018 |
| Transesophageal echocardiography and fluoroscopy for percutaneous closure of atrial septal defects: A comparative study                                                           | Xu W.; Li J.; Ye J.; Yu J.; Yu J.; Zhang Z.                                                                                                                                       | 2018 |
| Resective Treatment of Peri-implantitis: Clinical and Radiographic Outcomes After 2 Years                                                                                         | Englezos E.; Cosyn J.; Koole S.; Jacquet W.; De Bruyn H.                                                                                                                          | 2018 |
| Surgical Alternatives for Treating Peri-implantitis                                                                                                                               | Sarmiento H.L.; Norton M.; Korostoff J.; Ko K.I.; Fiorellini J.P.                                                                                                                 | 2018 |
| Dense cancellous bone as evidenced by a high HU value is predictive of late implant failure: a preliminary study                                                                  | Miyamoto I.; Takahashi T.; Tanaka T.; Hirayama B.; Tanaka K.; Yamazaki T.; Morimoto Y.; Yoshioka I.                                                                               | 2018 |
| Microstructural Evaluation of Contaminated Implant Surface Treated by Laser, Photodynamic Therapy, and Chlorhexidine 2 percent                                                    | Saffarpour A.; Nozari A.; Fekrazad R.; Saffarpour A.; Heibati M.N.; Iranparvar K.                                                                                                 | 2018 |

|                                                                                                                                                                                                           |                                                                                                                                                   |      |
|-----------------------------------------------------------------------------------------------------------------------------------------------------------------------------------------------------------|---------------------------------------------------------------------------------------------------------------------------------------------------|------|
| Liquid-infused titanium as biofilm-repellent implant surface                                                                                                                                              | Doll K.; Yang I.; Fadeeva E.; Schaeske J.; Kommerein N.; Szafranski S.P.; Greuling A.; Winkel A.; Chichkov B.N.; Stumpp N.S.; Stiesch M.          | 2018 |
| Anaerobic bacteria in implants and homologous teeth 2-14 years after implantation                                                                                                                         | Savić I.; Bošnjak A.; Beader N.; Lovrić Ž.; Salihagić A.; Gašparac I.                                                                             | 2018 |
| Sodium bicarbonate: A review and its uses in dentistry                                                                                                                                                    | Madeswaran S.; Jayachandran S.                                                                                                                    | 2018 |
| Confocal fluorescence imaging to evaluate the effect of antimicrobial photodynamic therapy depth on <i>P. gingivalis</i> and <i>T. denticola</i> biofilms                                                 | Rogers S.; Honma K.; Mang T.S.                                                                                                                    | 2018 |
| Influence of the abutment height and connection timing in early peri-implant marginal bone changes: A prospective randomized clinical trial                                                               | Borges T.; Leitão B.; Pereira M.; Carvalho Á.; Galindo-Moreno P.                                                                                  | 2018 |
| Morbidity following transcresal and lateral sinus floor elevation: A randomized trial                                                                                                                     | Farina R.; Franceschetti G.; Travaglini D.; Consolo U.; Minenna L.; Schincaglia G.P.; Riccardi O.; Bandieri A.; Maietti E.; Trombelli L.          | 2018 |
| Wound Healing in Dental Implant Surgery in Patients with or without Antibiotic Prophylaxis                                                                                                                | Shinde S.V.; Chansoria S.; Limaye M.; Vijay M.; Bansal S.; Dhakne V.M.                                                                            | 2018 |
| Peri-implant Bone Loss of Tissue-Level and Bone-Level Implants in the Esthetic Zone with Gingival Biotype Analysis                                                                                        | Wallner G.; Rieder D.; Wichmann M.G.; Heckmann S.M.                                                                                               | 2018 |
| Titanium implants and silent inflammation in jawbone—a critical interplay of dissolved titanium particles and cytokines TNF- $\alpha$ and RANTES/CCL5 on overall health?                                  | Lechner J.; Numbissi S.; von Baehr V.                                                                                                             | 2018 |
| A Histologic and Histomorphometric Retrospective Analysis of the Outcomes of Ridge Preservation Using Anorganic Bovine Bone Minerals and a Nonresorbable Membrane                                         | Min S.; Freire M.; Bakshallian N.; Wu I.; Zadeh H.H.                                                                                              | 2018 |
| Clinical and Radiographic Evaluation of Bar, Telescopic, and Locator Attachments for Implant-Stabilized Overdentures in Patients with Mandibular Atrophied Ridges: A Randomized Controlled Clinical Trial | ELsyad M.A.; Denewar B.A.; Elsaih E.A.                                                                                                            | 2018 |
| Rituximab in idiopathic retroperitoneal fibrosis                                                                                                                                                          | Boyeva V.; Alabsi H.; Seidman M.; Paterson R.; Kur J.; Chang S.; Chen L.; Carruthers M.                                                           | 2018 |
| Pessary versus poise impressa® trial (PPIT) for the management of stress urinary incontinence, a randomized cross-over trial                                                                              | Elshatanoufy S.; Hicks B.; Estanol M.V.C.; Richardson D.A.; Atiemo H.; Luck A.M.                                                                  | 2018 |
| Use of takayasu arteritis damage score (TADS) to measure damage in takayasu arteritis                                                                                                                     | Rajappa S.M.; Venkataraman K.                                                                                                                     | 2018 |
| The outcomes of ureterolysis during surgery for deep infiltrating endometriosis in stented patients                                                                                                       | Smith D.; Mikhail M.; Fisher G.; Arumuham V.; Allen S.; Vashisht A.; Saridogan E.; Cutner A.                                                      | 2018 |
| Patients' perspectives on urethral bulk injection therapy and mid-urethral sling surgery for stress urinary incontinence                                                                                  | Casteleijn F.M.; Zwolsman S.E.; Kowalik C.R.; Roovers J.-P.P.W.R.                                                                                 | 2018 |
| Perioperative interventions in pelvic organ prolapse surgery                                                                                                                                              | Haya N.; Feiner B.; Baessler K.; Christmann-Schmid C.; Maher C.                                                                                   | 2018 |
| Association of advanced glycation end products with peri-implant inflammation in prediabetes and type 2 diabetes mellitus patients                                                                        | Alrabiah M.; Al-Aali K.A.; Al-Sowygh Z.H.; Binmahfooz A.M.; Mokeem S.A.; Abduljabbar T.                                                           | 2018 |
| The association between three attitude-related indexes of oral hygiene and secondary implant failures: A retrospective longitudinal study                                                                 | Tecco S.; Grusovin M.G.; Sciara S.; Bova F.; Pantaleo G.; Capparé P.                                                                              | 2018 |
| Ten-year follow-up of dental implants used for immediate loading in the edentulous mandible: A prospective clinical study                                                                                 | Windael S.; Vervaeke S.; Wijnen L.; Jacquet W.; De Bruyn H.; Collaert B.                                                                          | 2018 |
| Influence of keratinized mucosa on peri-implant soft tissue health among patients with chronic periodontitis susceptibility                                                                               | Qian J.-L.; Shu R.; Wang Y.-W.; Xie Y.-F.                                                                                                         | 2018 |
| Implant survival rates and biologic complications with implant-supported fixed complete dental prostheses: A retrospective study with up to 12-year follow-up                                             | Papaspyridakos P.; Barizan Bordin T.; Kim Y.-J.; DeFuria C.; Pagni S.E.; Chochlidakis K.; Rolim Teixeira E.; Weber H.-P.                          | 2018 |
| Surface property alterations and osteoblast attachment to contaminated titanium surfaces after different surface treatments: An in vitro study                                                            | Lee B.-S.; Shih K.-S.; Lai C.-H.; Takeuchi Y.; Chen Y.-W.                                                                                         | 2018 |
| Ultrasonography for noninvasive and real-time evaluation of peri-implant tissue dimensions                                                                                                                | Chan H.-L.; Sinjab K.; Li J.; Chen Z.; Wang H.-L.; Kripfgans O.D.                                                                                 | 2018 |
| In vitro and in vivo studies of anti-bacterial copper-bearing titanium alloy for dental application                                                                                                       | Liu R.; Tang Y.; Zeng L.; Zhao Y.; Ma Z.; Sun Z.; Xiang L.; Ren L.; Yang K.                                                                       | 2018 |
| In Vivo Periodontium Formation Around Titanium Implants Using Periodontal Ligament Cell Sheet                                                                                                             | Washio K.; Tsutsumi Y.; Tsumanuma Y.; Yano K.; Srithanyarat S.S.; Takagi R.; Ichinose S.; Meinzer W.; Yamato M.; Okano T.; Hanawa T.; Ishikawa I. | 2018 |
| Peri-implant soft tissue status and crestal bone levels around adjacent implants placed in patients with and without type-2 diabetes mellitus: 6 years follow-up results                                  | Alasqah M.N.; Alrabiah M.; Al-Aali K.A.; Mokeem S.A.; Binmahfooz A.M.; ArRejaie A.S.; Abduljabbar T.                                              | 2018 |
| One-year clinical outcomes of locking taper Equator attachments retaining mandibular overdentures to narrow diameter implants                                                                             | Marcello-Machado R.M.; Faot F.; Schuster A.J.; Bielemann A.M.; Chagas Júnior O.L.; Del Bel Cury A.A.                                              | 2018 |
| Apicoectomy and Scanning Electron Microscopy Analysis of an Implant Infected by Apical (Retrograde) Peri-implantitis: A Case Letter                                                                       | Manfro R.; Garcia G.F.; Bortoluzzi M.C.; Fabris V.; Bacchi A.; Elias C.N.                                                                         | 2018 |
| Rehabilitation of Postextractive Socket in the Premaxilla: A 12-Year Study on 27 Titanium Plasma Spray Resorbable Calcium Phosphate Coated Single Implants                                                | Perrotti V.; Voza I.; Tumedei M.; Pompa G.; Iaculli F.; Quaranta A.                                                                               | 2018 |
| Survival of dental implants placed in vascularised fibula free flaps after jaw reconstruction                                                                                                             | Attia S.; Wiltfang J.; Pons-Kühnemann J.; Wilbrand J.-F.; Streckbein P.; Kähling C.; Howaldt H.-P.; Schaaf H.                                     | 2018 |
| The influence of implant-abutment connection to peri-implant bone loss: A systematic review and meta-analysis                                                                                             | Caricasulo R.; Malchiodi L.; Ghensi P.; Fantozzi G.; Cucchi A.                                                                                    | 2018 |
| Peri-implant tissue healing at implants with different designs and placement protocols: An experimental study in dogs                                                                                     | Oskarsson M.; Otsuki M.; Welander M.; Abrahamsson I.                                                                                              | 2018 |
| Influence of the Buccal Bone Crest Width on Peri-Implant Hard and Soft Tissues Dimensions: A Histomorphometric Study in Humans                                                                            | Omori Y.; Iezzi G.; Perrotti V.; Piattelli A.; Ferri M.; Nakajima Y.; Botticelli D.                                                               | 2018 |

|                                                                                                                                                                                                                                                                                             |                                                                                                                                                                                                                               |      |
|---------------------------------------------------------------------------------------------------------------------------------------------------------------------------------------------------------------------------------------------------------------------------------------------|-------------------------------------------------------------------------------------------------------------------------------------------------------------------------------------------------------------------------------|------|
| Clinical evaluation of short implants in atrophic posterior region                                                                                                                                                                                                                          | Zhang J.; Jiang H.-H.; Shang J.; Xu S.; Liu Z.-H.                                                                                                                                                                             | 2018 |
| The Conometric Concept: Definitive Fixed Lithium Disilicate Restorations Supported by Conical Abutments                                                                                                                                                                                     | Degidi M.; Nardi D.; Sighinolfi G.; Piattelli A.                                                                                                                                                                              | 2018 |
| Adjunctive stent use during endovascular intervention to the femoropopliteal artery with drug coated balloons: Insights from the XLPAD registry                                                                                                                                             | Kokkinidis D.G.; Jeon-Slaughter H.; Khalili H.; Brilakis E.S.; Shammam N.W.; Banerjee S.; Armstrong E.J.                                                                                                                      | 2018 |
| Laparoscopic sleeve gastrectomy in adolescents with or without syndromic obesity: two years follow-up                                                                                                                                                                                       | Iossa A.; De Peppo F.; Caccamo R.; Watkins B.M.; Abbatini F.; Ceriati E.; Silecchia G.                                                                                                                                        | 2018 |
| Tricuspid valve repair at the time of mitral valve surgery is safe and reduces the incidence of late tricuspid regurgitation and reoperation: A meta-analysis                                                                                                                               | Tam D.; Tran A.; Friedrich J.O.; Mazine A.; Tang G.L.; Gaudino M.F.L.; Calafiore A.M.; Fremes S.E.                                                                                                                            | 2018 |
| Assessment of the effect of addition of 24 hours of oral tranexamic acid post-operatively to a single intraoperative intravenous dose of tranexamic acid on calculated blood loss following primary hip and knee arthroplasty (TRAC-24): A study protocol for a randomised controlled trial | Hill J.; Magill P.; Dorman A.; Hogg R.; Eggleton A.; Benson G.; McFarland M.; Murphy L.; Gardner E.; Bryce L.; Martin U.; Adams C.; Bell J.; Campbell C.; Agus A.; Phair G.; Molloy D.; Mockford B.; O'Hagan S.; Beverland D. | 2018 |
| Peri-implant Tissue Health and Bone Resorption in Patients with Immediately Loaded, Implant-Supported, Full-Arch Prostheses                                                                                                                                                                 | Menini M.; Setti P.; Pera P.; Pera F.; Pesce P.                                                                                                                                                                               | 2018 |
| "Burden of the Triumph:" Burden of peri-implantitis in Indian population - A mathematical model                                                                                                                                                                                             | Thavarajah R.; Sudharsan R.; Joseph I.; Elizabeth J.; Umadevi K.R.; Ranganathan K.                                                                                                                                            | 2018 |
| Reosseointegration After Regenerative Surgical Therapy Using a Synthetic Bone Substitute for Peri-implantitis: Human Autopsy Study                                                                                                                                                          | Kim S.; Hu K.-S.; Jung U.-W.                                                                                                                                                                                                  | 2018 |
| Classification Systems for Peri-implantitis: A Narrative Review with a Proposal of a New Evidence-Based Etiology Codification                                                                                                                                                               | Tallarico M.; Canullo L.; Wang H.-L.; Cochran D.L.; Meloni S.M.                                                                                                                                                               | 2018 |
| A 13- to 32-Year Retrospective Study of Bone Stability for Machined Dental Implants                                                                                                                                                                                                         | Simion M.; Nevins M.; Rasperini G.; Tironi F.                                                                                                                                                                                 | 2018 |
| Impact of different placement depths on the crestal bone level of immediate versus delayed placed platform-switched implants                                                                                                                                                                | Madani E.; Smeets R.; Freiwald E.; Sanj M.S.; Jung O.; Grubeanu D.; Hanken H.; Henningsen A.                                                                                                                                  | 2018 |
| Is Antimicrobial Photodynamic Therapy Effective for Microbial Load Reduction in Peri-implantitis Treatment? A Systematic Review and Meta-Analysis                                                                                                                                           | Fraga R.S.; Antunes L.A.A.; Fontes K.B.F.D.C.; Küchler E.C.; Iorio N.L.P.P.; Antunes L.S.                                                                                                                                     | 2018 |
| Dental implants placed in severely atrophic jaws reconstructed with autogenous calvarium, bovine bone mineral, and collagen membranes: A 3- to 19-year retrospective follow-up study                                                                                                        | Chiapasco M.; Tommasato G.; Palombo D.; Scarnò D.; Zaniboni M.; Del Fabbro M.                                                                                                                                                 | 2018 |
| Five-Year Survival of Short Single-Tooth Implants (6 mm): A Randomized Controlled Clinical Trial                                                                                                                                                                                            | Naenni N.; Sahrman P.; Schmidlin P.R.; Attin T.; Wiedemeier D.B.; Sapata V.; Hämmerle C.H.F.; Jung R.E.                                                                                                                       | 2018 |
| A Prospective Multicenter Study on Radiographic Crestal Bone Changes Around Dental Implants Placed at Crestal or Subcrestal Level: One-Year Findings                                                                                                                                        | Gatti C.; Gatti F.; Silvestri M.; Mintrone F.; Rossi R.; Tridondani G.; Piacentini G.; Borrelli P.                                                                                                                            | 2018 |
| Impact of Implant Number on Mandibular Implant-Supported Profile Prostheses: A Systematic Review                                                                                                                                                                                            | Lima L.B.; de Freitas N.R.; Novais V.R.; Simamoto Júnior P.C.                                                                                                                                                                 | 2018 |
| Intra- and inter-examiner agreement when assessing radiographic implant bone levels: Differences related to brightness, accuracy, participant demographics and implant characteristics                                                                                                      | Walton T.R.; Layton D.M.                                                                                                                                                                                                      | 2018 |
| Are Intraoral Radiographs Accurate in Determining the Peri-implant Marginal Bone Level?                                                                                                                                                                                                     | Cassetta M.; Di Giorgio R.; Barbato E.                                                                                                                                                                                        | 2018 |
| In vitro antibacterial and cytotoxic activities of carvacrol and terpinen-4-ol against biofilm formation on titanium implant surfaces                                                                                                                                                       | Maquera-Huacho P.M.; Tonon C.C.; Correia M.F.; Francisconi R.S.; Bordini E.A.F.; Marcantonio É.; Spolidorio D.M.P.                                                                                                            | 2018 |
| Omega-3 Polyunsaturated Fatty Acid Supplementation to Prevent Arteriovenous Fistula and Graft Failure: A Systematic Review and Meta-analysis of Randomized Controlled Trials                                                                                                                | Viecelli A.K.; Irish A.B.; Polkinghorne K.R.; Hawley C.M.; Johnson D.W.; Mori T.A.; Pascoe E.M.; Strippoli G.F.M.; Lok C.E.; Palmer S.C.                                                                                      | 2018 |
| Clinical characteristics of peri-implant mucositis and peri-implantitis                                                                                                                                                                                                                     | Ramanauskaite A.; Becker K.; Schwarz F.                                                                                                                                                                                       | 2018 |
| A 5-year randomized clinical trial comparing minimally with moderately rough implants in patients with severe periodontitis                                                                                                                                                                 | Raes M.; D'hondt R.; Teughels W.; Coucke W.; Quirynen M.                                                                                                                                                                      | 2018 |
| Peri-implant conditions and levels of advanced glycation end products among patients with different glycemic control                                                                                                                                                                        | Al-Sowayh Z.H.; Ghani S.M.A.; Sergis K.; Vohra F.; Akram Z.                                                                                                                                                                   | 2018 |
| Influence of the width of keratinized tissue on the development and resolution of experimental peri-implant mucositis lesions in humans                                                                                                                                                     | Schwarz F.; Becker J.; Civalé S.; Sahin D.; Iglhaut T.; Iglhaut G.                                                                                                                                                            | 2018 |
| A new classification scheme for periodontal and peri-implant diseases and conditions - Introduction and key changes from the 1999 classification                                                                                                                                            | Caton J.G.; Armitage G.; Berglundh T.; Chapple I.L.C.; Jepsen S.; Kornman K.S.; Mealey B.L.; Papapanou P.N.; Sanz M.; Tonetti M.S.                                                                                            | 2018 |
| Peri-implant parameters, tumor necrosis factor-alpha, and interleukin-1 beta levels in vaping individuals                                                                                                                                                                                   | Al-Aali K.A.; Alrabiah M.; ArRejaie A.S.; Abduljabbar T.; Vohra F.; Akram Z.                                                                                                                                                  | 2018 |
| A retrospective study on the crestal bone loss associated with different implant surfaces in chronic periodontitis patients under maintenance                                                                                                                                               | Gallego L.; Sicilia A.; Sicilia P.; Mallo C.; Cuesta S.; Sanz M.                                                                                                                                                              | 2018 |
| Is osteoporosis a risk factor for implant survival or failure?                                                                                                                                                                                                                              | Grisa A.; Veitz-Keenan A.                                                                                                                                                                                                     | 2018 |
| Staging and grading of periodontitis: Framework and proposal of a new classification and case definition                                                                                                                                                                                    | Tonetti M.S.; Greenwell H.; Kornman K.S.                                                                                                                                                                                      | 2018 |
| Staging and grading of periodontitis: Framework and proposal of a new classification and case definition                                                                                                                                                                                    | Tonetti M.S.; Greenwell H.; Kornman K.S.                                                                                                                                                                                      | 2018 |
| Peri-implant bone loss clinical and radiographic evaluation around rough neck and microthread implants: a 5-year study                                                                                                                                                                      | Calvo-Guirado J.L.; López-López P.J.; Pérez-Albacete Martínez C.; Javed F.; Granero-Marín J.M.; Maté Sánchez de Val J.E.; Ramírez Fernández M.P.                                                                              | 2018 |
| Peri-implant squamous cell carcinoma                                                                                                                                                                                                                                                        | Ito K.; Takahashi K.; Eda T.; Kondoh T.; Goss A.                                                                                                                                                                              | 2018 |

|                                                                                                                                                                                                                  |                                                                                                                                                                                                                                                                                                                                                                                                                                                                                                                                                                                                                                                                                                                                                                                                                                                                                                                                                                                                                                                                                                                                                                                                                                                                                                                                                                                                                                                                                                                                                                                                                                             |      |
|------------------------------------------------------------------------------------------------------------------------------------------------------------------------------------------------------------------|---------------------------------------------------------------------------------------------------------------------------------------------------------------------------------------------------------------------------------------------------------------------------------------------------------------------------------------------------------------------------------------------------------------------------------------------------------------------------------------------------------------------------------------------------------------------------------------------------------------------------------------------------------------------------------------------------------------------------------------------------------------------------------------------------------------------------------------------------------------------------------------------------------------------------------------------------------------------------------------------------------------------------------------------------------------------------------------------------------------------------------------------------------------------------------------------------------------------------------------------------------------------------------------------------------------------------------------------------------------------------------------------------------------------------------------------------------------------------------------------------------------------------------------------------------------------------------------------------------------------------------------------|------|
| Evaluation of peri-implant bone density changes in maxillary premolar region using computed tomography: A retrospective study                                                                                    | Aldaili M.; Ganji K.K.; Alanazi A.F.; Alam M.K.                                                                                                                                                                                                                                                                                                                                                                                                                                                                                                                                                                                                                                                                                                                                                                                                                                                                                                                                                                                                                                                                                                                                                                                                                                                                                                                                                                                                                                                                                                                                                                                             | 2018 |
| TiO <sub>2</sub> /Ag-TiO <sub>2</sub> Nanohybrid Films are Cytocompatible with Primary Epithelial Cells of Human Origin: An In Vitro Study                                                                       | Masa R.; Deák Á.; Braunitzer G.; Tóth Z.; Kopniczky J.; Pelsöczy-Kovács I.; Ungvári K.; Dékány I.; Turzó K.                                                                                                                                                                                                                                                                                                                                                                                                                                                                                                                                                                                                                                                                                                                                                                                                                                                                                                                                                                                                                                                                                                                                                                                                                                                                                                                                                                                                                                                                                                                                 | 2018 |
| Effect of Various Laser Wavelengths on Temperature Changes During Periimplantitis Treatment: An in vitro Study                                                                                                   | Monzavi A.; Fekrazad R.; Chinipardaz Z.; Shahabi S.; Behruzi R.; Chiniforush N.                                                                                                                                                                                                                                                                                                                                                                                                                                                                                                                                                                                                                                                                                                                                                                                                                                                                                                                                                                                                                                                                                                                                                                                                                                                                                                                                                                                                                                                                                                                                                             | 2018 |
| Surgery without papilla incision: tunneling flap procedures in plastic periodontal and implant surgery                                                                                                           | Zuhr O.; Rebele S.F.; Cheung S.L.; Hürzeler M.B.                                                                                                                                                                                                                                                                                                                                                                                                                                                                                                                                                                                                                                                                                                                                                                                                                                                                                                                                                                                                                                                                                                                                                                                                                                                                                                                                                                                                                                                                                                                                                                                            | 2018 |
| Comparative evaluation of soft and hard tissue changes following endosseous implant placement using flap and flapless techniques in the posterior edentulous areas of the mandible-a randomized controlled trial | Kumar D.; Sivaram G.; Shivakumar B.; Kumar T.                                                                                                                                                                                                                                                                                                                                                                                                                                                                                                                                                                                                                                                                                                                                                                                                                                                                                                                                                                                                                                                                                                                                                                                                                                                                                                                                                                                                                                                                                                                                                                                               | 2018 |
| Fiber-Reinforced Resin Fixed Prosthesis on 4 Short Implants in Severely Atrophic Maxillas: 1-Year Results of a Prospective Cohort Study                                                                          | Wagner F.; Seemann R.; Marincola M.; Ewers R.                                                                                                                                                                                                                                                                                                                                                                                                                                                                                                                                                                                                                                                                                                                                                                                                                                                                                                                                                                                                                                                                                                                                                                                                                                                                                                                                                                                                                                                                                                                                                                                               | 2018 |
| Maxillary Sinus Floor Augmentation With Synthetic Bone Substitutes Compared With Other Grafting Materials: A Systematic Review and Meta-analysis                                                                 | Starch-Jensen T.; Mordenfeld A.; Becktor J.P.; Jensen S.S.                                                                                                                                                                                                                                                                                                                                                                                                                                                                                                                                                                                                                                                                                                                                                                                                                                                                                                                                                                                                                                                                                                                                                                                                                                                                                                                                                                                                                                                                                                                                                                                  | 2018 |
| Complications of endovascular treatment for acute ischemic stroke: Prevention and management                                                                                                                     | Balami J.S.; White P.M.; McMeekin P.J.; Ford G.A.; Buchan A.M.                                                                                                                                                                                                                                                                                                                                                                                                                                                                                                                                                                                                                                                                                                                                                                                                                                                                                                                                                                                                                                                                                                                                                                                                                                                                                                                                                                                                                                                                                                                                                                              | 2018 |
| Fluorless single-step EUS-guided gallbladder drainage with cautery-enhanced lumen-apposing metal stent: A multicenter study                                                                                      | Mohamed A.M.; Garg R.; Barawi M.; Vyas N.; Sachdev M.; Diehl D.L.; Khara H.S.; Adler D.G.; Rustagi T.                                                                                                                                                                                                                                                                                                                                                                                                                                                                                                                                                                                                                                                                                                                                                                                                                                                                                                                                                                                                                                                                                                                                                                                                                                                                                                                                                                                                                                                                                                                                       | 2018 |
| Risk Factors for Surgical Site Infection Following Lower Limb Arthroplasty: A Retrospective Cohort Analysis of 3932 Lower Limb Arthroplasty Procedures in a High Volume Arthroplasty Unit                        | Almustafa M.A.; Ewen A.M.; Deakin A.H.; Picard F.; Clarke J.V.; Mahmood F.F.                                                                                                                                                                                                                                                                                                                                                                                                                                                                                                                                                                                                                                                                                                                                                                                                                                                                                                                                                                                                                                                                                                                                                                                                                                                                                                                                                                                                                                                                                                                                                                | 2018 |
| Evaluation on clinical application of Florida probes in probing peri-implant soft tissue                                                                                                                         | Ding Z.; Wang W.; Jin D.; Yu G.; Xuan D.                                                                                                                                                                                                                                                                                                                                                                                                                                                                                                                                                                                                                                                                                                                                                                                                                                                                                                                                                                                                                                                                                                                                                                                                                                                                                                                                                                                                                                                                                                                                                                                                    | 2018 |
| The effect of smoking on the outcome of dental implant treatment: A literature review                                                                                                                            | Baskaran K.; Nirosa T.; Jayashri P.                                                                                                                                                                                                                                                                                                                                                                                                                                                                                                                                                                                                                                                                                                                                                                                                                                                                                                                                                                                                                                                                                                                                                                                                                                                                                                                                                                                                                                                                                                                                                                                                         | 2018 |
| Expression Levels of Semaphorins 3A, 3B, 4A, and 4D on Human Peri-implantitis                                                                                                                                    | Bastos M.F.; de Franco L.; Garcia Tebar A.C.; Giro G.; Shibli J.A.                                                                                                                                                                                                                                                                                                                                                                                                                                                                                                                                                                                                                                                                                                                                                                                                                                                                                                                                                                                                                                                                                                                                                                                                                                                                                                                                                                                                                                                                                                                                                                          | 2018 |
| Contributing factors for peri-implantitis in endosseous dental implants - A review                                                                                                                               | Hemani K.; Dhanraj M.; Jain A.R.                                                                                                                                                                                                                                                                                                                                                                                                                                                                                                                                                                                                                                                                                                                                                                                                                                                                                                                                                                                                                                                                                                                                                                                                                                                                                                                                                                                                                                                                                                                                                                                                            | 2018 |
| Site-level risk predictors of peri-implantitis: A retrospective analysis                                                                                                                                         | Kumar P.S.; Dabdoub S.M.; Hegde R.; Ranganathan N.; Mariotti A.                                                                                                                                                                                                                                                                                                                                                                                                                                                                                                                                                                                                                                                                                                                                                                                                                                                                                                                                                                                                                                                                                                                                                                                                                                                                                                                                                                                                                                                                                                                                                                             | 2018 |
| Clinical outcomes of experimental gingivitis and peri-implant mucositis treatment with professionally administered plaque removal and photodynamic therapy                                                       | Zeza B.; Farina R.; Pilloni A.; Mongardini C.                                                                                                                                                                                                                                                                                                                                                                                                                                                                                                                                                                                                                                                                                                                                                                                                                                                                                                                                                                                                                                                                                                                                                                                                                                                                                                                                                                                                                                                                                                                                                                                               | 2018 |
| Clinical and Radiographic Performance of Rough Surfaced Implants Placed in the Atrophic Posterior Maxilla With Sinus Membrane Elevation Without Bone Grafting: A Prospective and Preliminary Study               | Park S.; Yoon H.-J.                                                                                                                                                                                                                                                                                                                                                                                                                                                                                                                                                                                                                                                                                                                                                                                                                                                                                                                                                                                                                                                                                                                                                                                                                                                                                                                                                                                                                                                                                                                                                                                                                         | 2018 |
| The impact of different torques for the insertion of immediately loaded implants on the peri-implant levels of angiogenesis- and bone-related markers                                                            | Verrastro Neto A.; Andrade R.; Corrêa M.G.; Casarin R.C.V.; Casati M.Z.; Pimentel S.P.; Ribeiro F.V.; Cirano F.R.                                                                                                                                                                                                                                                                                                                                                                                                                                                                                                                                                                                                                                                                                                                                                                                                                                                                                                                                                                                                                                                                                                                                                                                                                                                                                                                                                                                                                                                                                                                           | 2018 |
| Marginal bone loss at implants with different surface characteristics - A 20-year follow-up of a randomized controlled clinical trial                                                                            | Donati M.; Ekestubbe A.; Lindhe J.; Wennström J.L.                                                                                                                                                                                                                                                                                                                                                                                                                                                                                                                                                                                                                                                                                                                                                                                                                                                                                                                                                                                                                                                                                                                                                                                                                                                                                                                                                                                                                                                                                                                                                                                          | 2018 |
| Clinical and Radiographic Assessment of Three-Implant-Supported Fixed-Prosthesis Rehabilitation of the Edentulous Mandible: Immediate Versus Delayed Loading                                                     | Primo B.T.; Mezzari L.M.; da Fontoura Frasca L.C.; Linderman R.; Rivaldo E.G.                                                                                                                                                                                                                                                                                                                                                                                                                                                                                                                                                                                                                                                                                                                                                                                                                                                                                                                                                                                                                                                                                                                                                                                                                                                                                                                                                                                                                                                                                                                                                               | 2018 |
| Prevalence of metabolic syndrome in hypertensive patients affected by peri-implant diseases                                                                                                                      | Bisogni V.; Papi P.; Saracino V.; Di Murro B.; Penna D.; Concistrè A.; Petramala L.; Celi M.; Olmati F.; Iannucci G.; Pompa G.; Letizia C.                                                                                                                                                                                                                                                                                                                                                                                                                                                                                                                                                                                                                                                                                                                                                                                                                                                                                                                                                                                                                                                                                                                                                                                                                                                                                                                                                                                                                                                                                                  | 2018 |
| Fixed, Fiber-Reinforced Resin Bridges on 5.0-mm Implants in Severely Atrophic Mandibles: Up to 5 Years' Follow-Up of a Prospective Cohort Study                                                                  | Seemann R.; Wagner F.; Marincola M.; Ewers R.                                                                                                                                                                                                                                                                                                                                                                                                                                                                                                                                                                                                                                                                                                                                                                                                                                                                                                                                                                                                                                                                                                                                                                                                                                                                                                                                                                                                                                                                                                                                                                                               | 2018 |
| Adherence to best practice consensus guidelines for implant-based breast reconstruction: Results from the iBRA national practice questionnaire survey                                                            | Mylvaganam S.; Conroy E.J.; Williamson P.R.; Barnes N.L.P.; Cutress R.I.; Gardiner M.D.; Jain A.; Skillman J.M.; Thrush S.; Whisker L.J.; Blazeby J.M.; Potter S.; Holcombe C.; Barnes N.L.P.; Blazeby J.M.; Branford O.A.; Conroy E.J.; Cutress R.I.; Gardiner M.D.; Holcombe C.; Jain A.; McEvoy K.; Mills N.; Mylvaganam S.; Potter S.; Skillman J.M.; Teasdale E.M.; Thrush S.; Whisker L.J.; Williamson P.R.; Tang L.; Nguyen D.; Johnson R.; Muralikrishnan V.; Chopra S.; Reid A.; Benyon S.; Murphy C.; Soliman F.; Lefemine V.; Saha S.; Ogedegbe K.; Olyinka O.S.; Dicks J.R.; Manoloudakis N.; Conroy F.; Irwin G.; McIntosh S.; Michalakis I.; Hignett S.; Linforth R.; Rathinaezhil R.; Osman H.; Anesti K.; Griffiths M.; Jacklin R.; Waterworth A.; Foulkes R.; Davies E.; Bisarya K.; Allan A.; Leon-Villapalos J.; Mazari F.A.K.; Azmy I.; George S.; Fahmy F.S.; Hargreaves A.; Seward J.; Hignett S.; Henton J.; Collin T.; Irwin G.; Mallon P.; Turner J.; Sarakbi W.; Athanasiou I.; Rogers C.; Youssef M.; Graja T.; Huf S.; Deol H.; Brindle R.; Gawne S.; Egbeare D.; Dash I.; Galea M.; Laws S.; Tayeh S.; Parvanta L.; Down S.; Westbroek D.; Roberts J.W.; Massey J.; Turton P.; Achuthan R.; Fawzy M.; Dickson M.; Carmichael A.R.; Akingboye A.; James R.; Kirkpatrick K.; Nael E.; Vidya R.; Potter S.; Thorne A.; Rostom M.; Depasquale I.; Cawthorn S.J.; Gangamihardja T.; Joglekar S.; Smith J.; Halka A.; MacMillan D.; Clark S.; Pearce B.; Mansfield L.; King I.; Hazari A.; Smith B.; Volleamere A.J.; Egbeare D.; Ferguson D.; Barnes N.; Holcombe C.; Knight A.; MacNeill F.; Conway A.; Irvine T.; | 2018 |

|                                                                                                                                                                  |                                                                                                                                                                                                                                                                                                                                                                                                      |      |
|------------------------------------------------------------------------------------------------------------------------------------------------------------------|------------------------------------------------------------------------------------------------------------------------------------------------------------------------------------------------------------------------------------------------------------------------------------------------------------------------------------------------------------------------------------------------------|------|
|                                                                                                                                                                  | Mylavaganam S.; Dunne N.; Kohlhardt S.; Hoo C.; Kirk S.; Hu J.; Ledwidge S.; Tang S.; Banerjee D.; Waheed S.; Voynov V.; Soumian S.; Henderson J.; Harvey J.; Robertson S.; Cutress R.I.; Mylvaganam S.; Waters R.; Carbone A.; Skillman J.; Farooq A.; Tafazal H.; Clarke D.; Cocker D.; Lai L.M.; Winter Beatty J.; Barkeji M.; Vinayagam R.; McEvoy K.; Mullan M.; Osborne C.; Baker E.; Piper J. |      |
| Cost effective scoliosis surgery: Comparison between low cost indian implants and imported implants                                                              | Kanna R.M.; Shetty A.; Rajasekaran S.                                                                                                                                                                                                                                                                                                                                                                | 2018 |
| Clinical outcomes after fractional flow reserve-guided treatment of oncology patients                                                                            | Donisan T.; Dayah T.; Balanescu D.V.; Karimzad K.; Boone D.L.; Lopez-Mattei J.; Kim P.Y.; Durand J.-B.; Yang E.H.; Herrmann J.; Marmagkiolis K.; Johnson N.P.; Iliescu C.                                                                                                                                                                                                                            | 2018 |
| A case series of trans-baffle lead extraction procedures involving patients with surgically corrected dextro-transposition of the great arteries (D-TGA)         | Breuer A.; Barnett A.; Triphan J.; Adsit G.; Roberts M.J.; Leal M.A.                                                                                                                                                                                                                                                                                                                                 | 2018 |
| Carotid revascularization and medical management for asymptomatic carotid stenosis: Crest-2 update                                                               | Howard G.; Meschia J.; Lal B.; Roubin G.; Brown R.; Barrett K.; Chaturvedi S.; Chimowitz M.; Demaerschalk B.; Howard V.; Huston J.; Lazar R.; Moore W.; Moy C.; Turan T.; Voeks J.; Brott T.                                                                                                                                                                                                         | 2018 |
| Long-term in vivo evolution of high-purity Mg screw degradation — Local and systemic effects of Mg degradation products                                          | Yu Y.; Lu H.; Sun J.                                                                                                                                                                                                                                                                                                                                                                                 | 2018 |
| Cost-benefit analysis of antibiofilm microbiological techniques for peri-prosthetic joint infection diagnosis                                                    | Romanò C.L.; Trentinaglia M.T.; De Vecchi E.; Logoluso N.; George D.A.; Morelli I.; Drago L.                                                                                                                                                                                                                                                                                                         | 2018 |
| Long-term implant performance and patients' satisfaction in oligodontia                                                                                          | Filius M.A.P.; Vissink A.; Cune M.S.; Raghoobar G.M.; Visser A.                                                                                                                                                                                                                                                                                                                                      | 2018 |
| Long-term outcome of surgical treatment of peri-implantitis. A 2-11-year retrospective study                                                                     | Berglundh T.; Wennström J.L.; Lindhe J.                                                                                                                                                                                                                                                                                                                                                              | 2018 |
| Intraoral versus extraoral cementation of implant-supported single crowns: Clinical, biomarker, and microbiological comparisons                                  | Kiran B.; Toman M.; Buduneli N.; Lappin D.F.; Toksavul S.; Nizam N.                                                                                                                                                                                                                                                                                                                                  | 2018 |
| Re-establishment of Biocompatibility of the In Vitro Contaminated Titanium Surface Using Osteoconductive Powders With Air-Abrasive Treatment                     | Tastepe C.S.; Lin X.; Donnet M.; Doulabi B.Z.; Wismeijer D.; Liu Y.                                                                                                                                                                                                                                                                                                                                  | 2018 |
| The Influence of Prosthesis Design on the Outcomes of Tooth Implants Immediately Placed and Loaded by Means of One-Piece Titanium Machined Restoration           | Toti P.; Marconcini S.; Enrica G.; Pedretti G.; Barone A.; Covani U.                                                                                                                                                                                                                                                                                                                                 | 2018 |
| Intrasinus locking technique: a novel use of the ring block technique at sinus perforations for simultaneous implant placement                                   | Sindel A.; Özarslan M.M.; Özalp Ö.                                                                                                                                                                                                                                                                                                                                                                   | 2018 |
| Dental implants in patients with osteoporosis: a systematic review with meta-analysis                                                                            | de Medeiros F.C.F.L.; Kudo G.A.H.; Leme B.G.; Saraiva P.P.; Verri F.R.; Honório H.M.; Pellizzer E.P.; Santiago Junior J.F.                                                                                                                                                                                                                                                                           | 2018 |
| Evaluation of peri-implant bone levels and soft tissue dimensions around zirconia implants—a three-year follow-up study                                          | Kniha K.; Schlegel K.A.; Kniha H.; Modabber A.; Hölzle F.; Kniha K.                                                                                                                                                                                                                                                                                                                                  | 2018 |
| Short dental implants in patients with oral lichen planus: a long-term follow-up                                                                                 | Anitua E.; Piñas L.; Escuer-Artero V.; Fernández R.S.; Alkhraisat M.H.                                                                                                                                                                                                                                                                                                                               | 2018 |
| Periodontal prosthesis in contemporary dentistry                                                                                                                 | Liu C.-L.S.                                                                                                                                                                                                                                                                                                                                                                                          | 2018 |
| Indolent Rib Osteomyelitis Following Breast Implant Reconstruction: An Unusual Case and Review of the Literature                                                 | Watson L.; Dunn D.; Fraser-Kirk G.                                                                                                                                                                                                                                                                                                                                                                   | 2018 |
| Influence of collars on the primary stability of cementless femoral stems: A finite element study using a diverse patient cohort                                 | Al-Dirini R.M.A.; Huff D.; Zhang J.; Besier T.; Clement J.G.; Taylor M.                                                                                                                                                                                                                                                                                                                              | 2018 |
| Surgical management of supra hepatic vena cava inferior thrombosis post liver transplantation via a transatrial approach. a case report                          | Gundlach J.-P.                                                                                                                                                                                                                                                                                                                                                                                       | 2018 |
| Effect of high-frequency loading and parathyroid hormone administration on peri-implant bone healing and osseointegration                                        | Shibamoto A.; Ogawa T.; Duyck J.; Vandamme K.; Naert I.; Sasaki K.                                                                                                                                                                                                                                                                                                                                   | 2018 |
| Periodontal status of tooth adjacent to implant with peri-implantitis                                                                                            | Sung C.-E.; Chiang C.-Y.; Chiu H.-C.; Shieh Y.-S.; Lin F.-G.; Fu E.                                                                                                                                                                                                                                                                                                                                  | 2018 |
| Peri-implant test is a proposal of a new procedure to prevent peri-implantitis and forensic claims                                                               | Gaudio R.M.; Ottria L.; Lauritano D.; Palmieri A.; Cura F.; Tagliabue A.; Tettamanti L.                                                                                                                                                                                                                                                                                                              | 2018 |
| Incidence of Peri-implant Diseases on Implants With and Without Laser-Microgrooved Collar: A 5-Year Retrospective Study Carried Out in Private Practice Patients | Guarnieri R.; Grande M.; Zuffetti F.; Testori T.                                                                                                                                                                                                                                                                                                                                                     | 2018 |
| Photodynamic therapy for the treatment of peri-implant diseases: A network meta-analysis of randomized controlled trials                                         | Sivaramakrishnan G.; Sridharan K.                                                                                                                                                                                                                                                                                                                                                                    | 2018 |
| Is Metal Particle Release Associated with Peri-implant Bone Destruction? An Emerging Concept                                                                     | Fretwurst T.; Nelson K.; Tarnow D.P.; Wang H.-L.; Giannobile W.V.                                                                                                                                                                                                                                                                                                                                    | 2018 |
| The medically compromised patient: Are dental implants a feasible option?                                                                                        | Vissink A.; Spijkervet F.K.L.; Raghoobar G.M.                                                                                                                                                                                                                                                                                                                                                        | 2018 |
| Mechanical, chemical and biological aspects of titanium and titanium alloys in implant dentistry                                                                 | Ottria L.; Lauritano D.; Andreasi Bassi M.; Palmieri A.; Candotto V.; Tagliabue A.; Tettamanti L.                                                                                                                                                                                                                                                                                                    | 2018 |
| The Efficacy of an Anatase-Coated Collar Surface in Inhibiting the Bacterial Colonization of Oral Implants: A Pilot Prospective Study in Humans                  | Cucchi A.; Molè F.; Rinaldi L.; Marchetti C.; Corinaldesi G.                                                                                                                                                                                                                                                                                                                                         | 2018 |
| A Survey Exploring the Experiences & Attitudes of Dental Implant Clinicians in the Management of Peri-implantitis within the United Kingdom                      | Kane G.; Fang V.; Simon S.; Girdler J.; Adeyinka O.; Alhilou A.                                                                                                                                                                                                                                                                                                                                      | 2018 |
| Bone response to functionally loaded, two-piece zirconia implants: A preclinical histometric study                                                               | Janner S.F.M.; Gahlert M.; Bosshardt D.D.; Roehling S.; Milz S.; Higginbottom F.; Buser D.; Cochran D.L.                                                                                                                                                                                                                                                                                             | 2018 |
| Retrospective Evaluation of Factors Related to the Outcomes of Regenerative Therapy for Implants Affected by Peri-implantitis                                    | Froum S.J.; Rosen P.S.; Wang W.C.; Froum S.H.; Vinayak S.                                                                                                                                                                                                                                                                                                                                            | 2018 |

|                                                                                                                                                                                                                                                                                                            |                                                                                                                                                                      |      |
|------------------------------------------------------------------------------------------------------------------------------------------------------------------------------------------------------------------------------------------------------------------------------------------------------------|----------------------------------------------------------------------------------------------------------------------------------------------------------------------|------|
| Prominence of scientific publications towards peri-implant complications in implantology: A bibliometric analysis using the H-classics method                                                                                                                                                              | Chiang H.-S.; Huang R.-Y.; Weng P.-W.; Mau L.-P.; Tsai Y.-W.C.; Chung M.-P.; Chung C.-H.; Yeh H.-W.; Shieh Y.-S.; Cheng W.-C.                                        | 2018 |
| Microbial findings in patients with implant supported dentures and electromagnetic field stimulation in the therapy of periimplantitis                                                                                                                                                                     | Žužul I.; Carek A.                                                                                                                                                   | 2018 |
| Single-Dose Bioavailability for Prophylactic Coverage in Patients Undergoing Dental Implant Surgery                                                                                                                                                                                                        | Aravena P.C.; Oyarzún C.P.; Arias M.F.; Monardes H.; Jerez A.; Benso B.                                                                                              | 2018 |
| A case of peri-mucositis: The importance of the oral cavity exam in evaluating new behavioral disturbance in a patient with advanced dementia                                                                                                                                                              | Blloshmi K.                                                                                                                                                          | 2018 |
| Osteogenic efficacy of BMP-2 mixed with hydrogel and bone substitute in peri-implant dehiscence defects in dogs: 16 weeks of healing                                                                                                                                                                       | Cha J.-K.; Jung U.-W.; Thoma D.S.; Hämmerle C.H.F.; Jung R.E.                                                                                                        | 2018 |
| Clinically Oriented Patient Maintenance Protocol: A Clinical Consensus of Experts                                                                                                                                                                                                                          | Del Fabbro M.; Nevins M.; Venturoli D.; Weinstein R.L.; Testori T.                                                                                                   | 2018 |
| The Effect of Moderately Controlled Type 2 Diabetes on Dental Implant Survival and Peri-implant Bone Loss: A Long-Term Retrospective Study                                                                                                                                                                 | Ormianer Z.; Block J.; Matalon S.; Kohen J.                                                                                                                          | 2018 |
| Decision Tree for Vertical Ridge Augmentation                                                                                                                                                                                                                                                              | Plonka A.B.; Urban I.A.; Wang H.-L.                                                                                                                                  | 2018 |
| Peri-Implant Mucosal Creeping: Two Case Reports                                                                                                                                                                                                                                                            | Parra C.; Capri D.                                                                                                                                                   | 2018 |
| Immediate Reconstruction of Failed Implants in the Esthetic Zone Using a Flapless Technique and Autogenous Composite Tuberosity Graft                                                                                                                                                                      | Raghoebar G.M.; Meijer H.J.A.; van Minnen B.; Vissink A.                                                                                                             | 2018 |
| Crestal Bone Level Around Tissue-Level Implants Restored with Platform Matching and Bone-Level Implants Restored with Platform Switching: A 5-Year Randomized Controlled Trial                                                                                                                             | Lago L.; da Silva L.; Martinez-Silva I.; Rilo B.                                                                                                                     | 2018 |
| PD-11 expression in cases of breast implant-associated anaplastic large cell lymphoma reveals a new target for therapy                                                                                                                                                                                     | Solorzano J.L.; Francisco-Cruz A.; Medeiros L.J.; Young K.H.; Clemens M.W.; Wistuba I.; Miranda R.                                                                   | 2018 |
| Learning from clinical phenotypes: Low-dose biophotonics therapies in oral diseases                                                                                                                                                                                                                        | Rahman S.U.; Mosca R.C.; Govindoo Reddy S.; Nunez S.C.; Andreana S.; Mang T.S.; Arany P.R.                                                                           | 2018 |
| Zinc plus octenidine: A new formulation for treating periodontal pathogens. A single blind study                                                                                                                                                                                                           | Lauritano D.; Candotto V.; Bignozzi C.A.; Pazzi D.; Carinci F.; Cura F.; Tagliabue A.; Tettamanti L.                                                                 | 2018 |
| Surgical implants and business ethics?                                                                                                                                                                                                                                                                     | Cosson M.; Fernandez H.                                                                                                                                              | 2018 |
| The role of zinc plus octenidine in the regulation of gene expression: An in vitro study                                                                                                                                                                                                                   | Lauritano D.; Candotto V.; Bignozzi C.A.; Pazzi D.; Carinci F.; Cura F.; Tagliabue A.; Tettamanti L.                                                                 | 2018 |
| The Woven EndoBridge (WEB) for endovascular therapy of intracranial aneurysms: Update of a systematic review with meta-analysis                                                                                                                                                                            | Tau N.; Sadeh-Gonik U.; Aulagner G.; Turjman F.; Gory B.; Armoiry X.                                                                                                 | 2018 |
| Safety of uninterrupted dabigatran in cardiovascular interventions in the GLORIA-AF registry program                                                                                                                                                                                                       | Lip G.Y.H.; Van Der Wall S.J.; Teutsch C.; Rothman K.J.; Diener H.C.; Dubner S.J.; Ma C.S.; Paquette M.; Lu S.; Riou Franca L.; Zint K.; Halperin J.L.; Huisman M.V. | 2018 |
| Variation in the rates of surgical treatment for female stress urinary incontinence in England: An ecological study                                                                                                                                                                                        | Geary R.; Duckett J.; El-Hamamsy D.; Mahmood T.; Monga A.; Toozs-Hobson P.; Wilson A.; Van Der Meulen J.; Tincello D.; Mamza J.; Gurol U.                            | 2018 |
| Limiting complication rates in implant-based breast reconstruction                                                                                                                                                                                                                                         | Locke M.B.; Malins W.L.E.; Le See J.; Kenealy J.                                                                                                                     | 2018 |
| Rationale and design of a global registry to evaluate real-world clinical outcomes in patients with atrial fibrillation and high risk of stroke treated with left atrial appendage occlusion using the AMPLATZER amulet device—Perspective of available/ongoing registries of catheter-based LAA occlusion | Hildick-Smith D.; Diener H.-C.; Schmidt B.; Paul V.; Settergren M.; Teiger E.; Camm J.; Tondo C.; Landmesser U.                                                      | 2018 |
| Peri-implant conditions and marginal bone loss around cemented and screw-retained single implant crowns in posterior regions: A retrospective cohort study with up to 4 years follow-up                                                                                                                    | Shi J.-Y.; Ni J.; Zhuang L.-F.; Zhang X.-M.; Fan L.-F.; Lai H.-C.                                                                                                    | 2018 |
| Restoration contour is a risk indicator for peri-implantitis: A cross-sectional radiographic analysis                                                                                                                                                                                                      | Katafuchi M.; Weinstein B.F.; Leroux B.G.; Chen Y.-W.; Daubert D.M.                                                                                                  | 2018 |
| Experimental research on Arginine-gingipain A gene vaccine from Porphyromonas gingivalis that prevents peri-implantitis in Beagle dogs                                                                                                                                                                     | Chuanhua L.; Zhifeng W.; Lina Z.; Xin F.; Jing L.                                                                                                                    | 2018 |
| Comparison of peri-implant clinical and radiographic status around short (6 mm in length) dental implants placed in cigarette-smokers and never-smokers: Six-year follow-up results                                                                                                                        | Abduljabbar T.; Al-Hamoudi N.; Al-Sowygh Z.H.; Alajmi M.; Javed F.; Vohra F.                                                                                         | 2018 |
| Comparison of peri-implant clinical and radiographic inflammatory parameters among cigarette and waterpipe (narghile) smokers and never-smokers                                                                                                                                                            | ALHarthi S.S.; BinShabaib M.S.; Ahmed H.B.; Mehmood A.; Khan J.; Javed F.                                                                                            | 2018 |
| The periodontal pocket                                                                                                                                                                                                                                                                                     | Donos N.                                                                                                                                                             | 2018 |
| Susceptibility of different mouse strains to peri-implantitis                                                                                                                                                                                                                                              | Hiyari S.; Naghibi A.; Wong R.; Sadreshkevary R.; Yi-Ling L.; Tetradis S.; Camargo P.M.; Pirih F.Q.                                                                  | 2018 |
| Evaluation of gingival crevicular fluid and peri-implant sulcus fluid levels of periostin: A preliminary report                                                                                                                                                                                            | Akman A.C.; Buyukozdemir Askin S.; Guncu G.N.; Nohutcu R.M.                                                                                                          | 2018 |
| Implants With and Without Laser-Microtextured Collar: A 10-Year Clinical and Radiographic Comparative Evaluation                                                                                                                                                                                           | Guarnieri R.; Ceccarelli R.; Ricci J.L.; Testori T.                                                                                                                  | 2018 |
| Risk factors for post-operative complications after procedures for autologous bone augmentation from different donor sites                                                                                                                                                                                 | Sakkas A.; Schramm A.; Winter K.; Wilde F.                                                                                                                           | 2018 |
| Hard tissue volume stability of guided bone regeneration during the healing stage in the anterior maxilla: A clinical and radiographic study                                                                                                                                                               | Jiang X.; Zhang Y.; Di P.; Lin Y.                                                                                                                                    | 2018 |
| Mini-implants and narrow diameter implants as mandibular overdenture retainers: A systematic review and meta-analysis of clinical and radiographic outcomes                                                                                                                                                | Marcello-Machado R.M.; Faot F.; Schuster A.J.; Nascimento G.G.; Del Bel Cury A.A.                                                                                    | 2018 |



|                                                                                                                                                                                               |                                                                                                                                                                                                                                                                                                                                                                                                                                                                                                                                                                                                                                                                                                                                                             |      |
|-----------------------------------------------------------------------------------------------------------------------------------------------------------------------------------------------|-------------------------------------------------------------------------------------------------------------------------------------------------------------------------------------------------------------------------------------------------------------------------------------------------------------------------------------------------------------------------------------------------------------------------------------------------------------------------------------------------------------------------------------------------------------------------------------------------------------------------------------------------------------------------------------------------------------------------------------------------------------|------|
| New approach for vertical bone regeneration using in situ gelling and sustained BMP-2 releasing poly(phosphazene) hydrogel system on peri-implant site with critical defect in a canine model | Seo B.-B.; Chang H.-I.; Choi H.; Koh J.-T.; Yun K.-D.; Lee J.-Y.; Song S.-C.                                                                                                                                                                                                                                                                                                                                                                                                                                                                                                                                                                                                                                                                                | 2018 |
| Definitive Abutments Placed at Implant Insertion and Never Removed: Is It an Effective Approach? A Systematic Review and Meta-Analysis of Randomized Controlled Trials                        | Tallarico M.; Caneva M.; Meloni S.M.; Khanari E.; Covani U.; Canullo L.                                                                                                                                                                                                                                                                                                                                                                                                                                                                                                                                                                                                                                                                                     | 2018 |
| Peri-conceptual progesterone treatment in women with unexplained recurrent miscarriage: a randomized double-blind placebo-controlled trial                                                    | Ismail A.M.; Abbas A.M.; Ali M.K.; Amin A.F.                                                                                                                                                                                                                                                                                                                                                                                                                                                                                                                                                                                                                                                                                                                | 2018 |
| The European Registry for Patients with Mechanical Circulatory Support (EUROMACS) of the European Association for Cardio-Thoracic Surgery (EACTS): Second report                              | de By T.M.M.H.; Mohacsi P.; Gahl B.; Zittermann A.; Krabatsch T.; Gustafsson F.; Leprince P.; Meyns B.; Netuka I.; Caliskan K.; Castedo E.; Musumeci F.; Vincentelli A.; Hetzer R.; Gummert J.                                                                                                                                                                                                                                                                                                                                                                                                                                                                                                                                                              | 2018 |
| Guidelines of the American Venous Forum on venous and lymphatic disorders                                                                                                                     | Gloviczki P.                                                                                                                                                                                                                                                                                                                                                                                                                                                                                                                                                                                                                                                                                                                                                | 2018 |
| A novel cold atmospheric pressure air plasma jet for peri-implantitis treatment: An in vitro study                                                                                            | Yang Y.; Guo J.; Zhou X.; Liu Z.; Wang C.; Wang K.; Zhang J.; Wang Z.                                                                                                                                                                                                                                                                                                                                                                                                                                                                                                                                                                                                                                                                                       | 2018 |
| Effect of implant placement depth on the peri-implant bone defect configurations in ligature-induced peri-implantitis: An experimental study in dogs                                          | Huang B.; Zhang L.; Xu L.; Zhu W.; Witek L.; Tovar N.; Coelho P.G.; Meng H.                                                                                                                                                                                                                                                                                                                                                                                                                                                                                                                                                                                                                                                                                 | 2018 |
| International guidelines for groin hernia management                                                                                                                                          | The Herniasurge Group; Simons M.P.; Smietanski M.; Bonjer H.J.; Bittner R.; Miserez M.; Aufenacker T.J.; Chowbey P.K.; Tran H.M.; Sani R.; Berrevoet F.; Bingener J.; Bisgaard T.; Bury K.; Campanelli G.; Chen D.C.; Conze J.; Cuccurullo D.; de Beaux A.C.; Eker H.H.; Fortelny R.H.; Gillion J.F.; van Den Heuvel B.J.; Hope W.W.; Jorgensen L.N.; Klinge U.; Köckerling F.; Kukleta J.F.; Konate I.; Liem A.L.; Lomanto D.; Loos M.J.A.; Lopez-Cano M.; Misra M.C.; Montgomery A.; Morales-Conde S.; Muysoms F.E.; Niebuhr H.; Nordin P.; Pawlak M.; van Ramshorst G.H.; Reinbold W.M.J.; Sanders D.L.; Schouten N.; Smedberg S.; Simmermacher R.K.J.; Tuntavittikul S.; van Veenendaal N.; Weyhe D.; Wijsmuller A.R.; Jeekel J.; Sharma A.; Ramshaw B. | 2018 |
| Evaluation of peri-implant tissues around nanopore surface implants with or without platelet rich fibrin: A clinico-radiographic study                                                        | Khan Z.A.; Jhingran R.; Bains V.K.; Madan R.; Srivastava R.; Rizvi I.                                                                                                                                                                                                                                                                                                                                                                                                                                                                                                                                                                                                                                                                                       | 2018 |
| Comparison of outcome measures and complication rates following three different approaches for primary total hip arthroplasty: A pragmatic randomised controlled trial                        | Talia A.J.; Coetzee C.; Tirosh O.; Tran P.                                                                                                                                                                                                                                                                                                                                                                                                                                                                                                                                                                                                                                                                                                                  | 2018 |
| Is History of Periodontitis a Risk Factor for Peri-implant Disease? A Pilot Study                                                                                                             | Altay M.A.; Tozoğlu S.; Yıldırım N.; Özarslan M.M.                                                                                                                                                                                                                                                                                                                                                                                                                                                                                                                                                                                                                                                                                                          | 2018 |
| The Ability of Quantitative, Specific, and Sensitive Point-of-Care/Chair-Side Oral Fluid Immunotests for aMMP-8 to Detect Periodontal and Peri-Implant Diseases                               | Alassiri S.; Parnanen P.; Rathnayake N.; Johannsen G.; Heikkinen A.-M.; Lazzara R.; Van Der Schoor P.; Van Der Schoor J.G.; Tervahartala T.; Gieselmann D.; Sorsa T.                                                                                                                                                                                                                                                                                                                                                                                                                                                                                                                                                                                        | 2018 |
| Management of peri-implantitis - A survey                                                                                                                                                     | Swetha V.; Ganapathy D.; Jain A.R.                                                                                                                                                                                                                                                                                                                                                                                                                                                                                                                                                                                                                                                                                                                          | 2018 |
| Supportive peri-implant therapy following anti-infective surgical peri-implantitis treatment: 5-year survival and success                                                                     | Heitz-Mayfield L.J.A.; Salvi G.E.; Mombelli A.; Loup P.-J.; Heitz F.; Kruger E.; Lang N.P.                                                                                                                                                                                                                                                                                                                                                                                                                                                                                                                                                                                                                                                                  | 2018 |
| Surgical treatment of peri-implantitis: Prognostic indicators of short-term results                                                                                                           | Koldslund O.C.; Wohlfahrt J.C.; Aass A.M.                                                                                                                                                                                                                                                                                                                                                                                                                                                                                                                                                                                                                                                                                                                   | 2018 |
| Clinical and radiographic assessment of implant-supported rehabilitation of partial and complete edentulism: A 2 to 8 years clinical follow-up                                                | Manicone P.F.; Passarelli P.C.; Bigagnoli S.; Pastorino R.; Manni A.; Pasquantonio G.; D'Addona A.                                                                                                                                                                                                                                                                                                                                                                                                                                                                                                                                                                                                                                                          | 2018 |
| Biology of teeth and implants: Host factors - pathology, regeneration, and the role of stem cells                                                                                             | Eggert F.-M.; Levin L.                                                                                                                                                                                                                                                                                                                                                                                                                                                                                                                                                                                                                                                                                                                                      | 2018 |
| Comparison of Clinical, Radiographic, and Immunologic Inflammatory Parameters around Crestally and Subcrestally Placed Dental Implants: 5-Year Retrospective Results                          | Al Amri M.D.; Alfadda S.A.; Labban N.Y.; Alasqah M.N.; Alshehri F.A.; Al-Rasheed A.S.                                                                                                                                                                                                                                                                                                                                                                                                                                                                                                                                                                                                                                                                       | 2018 |
| Implant treatment in pharmacologically immunosuppressed liver transplant patients: A prospective-controlled study                                                                             | Paredes V.; López-Pintor R.M.; Torres J.; de Vicente J.C.; Sanz M.; Hernández G.                                                                                                                                                                                                                                                                                                                                                                                                                                                                                                                                                                                                                                                                            | 2018 |
| Narrow- and regular-diameter implants in the posterior region of the jaws to support single crowns: A 3-year split-mouth randomized clinical trial                                            | de Souza A.B.; Sukekava F.; Tolentino L.; César-Neto J.B.; Garcez-Filho J.; Araújo M.G.                                                                                                                                                                                                                                                                                                                                                                                                                                                                                                                                                                                                                                                                     | 2018 |
| Five-year outcomes of a randomized clinical trial comparing bone-level implants with either submerged or transmucosal healing                                                                 | Flores-Guillen J.; Álvarez-Novoa C.; Barbieri G.; Martín C.; Sanz M.                                                                                                                                                                                                                                                                                                                                                                                                                                                                                                                                                                                                                                                                                        | 2018 |
| Influence of Microtextured Implant Surfaces on Peri-implantitis and Its Treatment: A Preclinical Trial                                                                                        | Rodríguez J.C.; Koticha T.; Eubanks D.L.; Rudek I.; Molz F.J.; Chiavaccini L.; Claude A.; Elder S.; Wang H.-L.                                                                                                                                                                                                                                                                                                                                                                                                                                                                                                                                                                                                                                              | 2018 |
| 5-year outcomes after coverage of soft tissue dehiscence around single implants: A prospective cohort study                                                                                   | Zucchelli G.; Felice P.; Mazzotti C.; Marzadori M.; Mounssif I.; Monaco C.; Stefanini M.                                                                                                                                                                                                                                                                                                                                                                                                                                                                                                                                                                                                                                                                    | 2018 |
| Long-term outcomes of narrow diameter implants in posterior jaws: A retrospective study with at least 8-year follow-up                                                                        | Shi J.-Y.; Xu F.-Y.; Zhuang L.-F.; Gu Y.-X.; Qiao S.-C.; Lai H.-C.                                                                                                                                                                                                                                                                                                                                                                                                                                                                                                                                                                                                                                                                                          | 2018 |
| Peri-implantitis Management in the Esthetic Zone in a Periodontally Compromised Patient: Five-Year Results Including Cone Beam Computed Tomography                                            | Kourkouta S.                                                                                                                                                                                                                                                                                                                                                                                                                                                                                                                                                                                                                                                                                                                                                | 2018 |
| The use of antibiotics: Data analysis of a survey among a sample of Italian dentists                                                                                                          | Giargia M.; Scotti E.; Marchetti S.; Mensi M.                                                                                                                                                                                                                                                                                                                                                                                                                                                                                                                                                                                                                                                                                                               | 2018 |
| Digital versus analog procedures for the prosthetic restoration of single implants: A randomized controlled trial with 1 year of follow-up                                                    | Mangano F.; Veronesi G.                                                                                                                                                                                                                                                                                                                                                                                                                                                                                                                                                                                                                                                                                                                                     | 2018 |
| Peri-implant clinical and radiographic status and whole salivary cotinine levels among cigarette and waterpipe smokers and never-smokers                                                      | BinShabaib M.S.; Mehmood A.; Akram Z.; AlHarthi S.S.                                                                                                                                                                                                                                                                                                                                                                                                                                                                                                                                                                                                                                                                                                        | 2018 |

|                                                                                                                                                                                                                                             |                                                                                                                                                                                                                |      |
|---------------------------------------------------------------------------------------------------------------------------------------------------------------------------------------------------------------------------------------------|----------------------------------------------------------------------------------------------------------------------------------------------------------------------------------------------------------------|------|
| Long-Term Effects of Bone Morphogenetic Protein-2-Loaded Calcium Phosphate on Maxillary Sinus Lift Surgery for Delayed and Simultaneous Dental Implantation                                                                                 | Ding Y.; Wang X.                                                                                                                                                                                               | 2018 |
| Bone minimodeling, a special modeling pattern and potential as therapeutic target for osteoporosis                                                                                                                                          | Li X.; Zhang J.; Wang X.                                                                                                                                                                                       | 2018 |
| Peri-implant Tissues and Patient Satisfaction After Treatment of Vertically Augmented Atrophic Posterior Mandibles with Intraoral Onlay Block Bone Grafts: A Retrospective 3-Year Case Series Follow-up Study                               | Aloy-Prósper A.; Peñarrocha-Oltra D.; Peñarrocha-Diago M.; Hernández-Alfaro F.; Peñarrocha-Diago M.                                                                                                            | 2018 |
| Chronic Periodontitis and RANKL/OPG Ratio in Peri-Implant Mucosae Inflammation                                                                                                                                                              | Costa L.C.; Fonseca M.A.D.; Pinheiro A.D.R.; Aguiar T.R.D.S.; Machado A.N.; Quinelato V.; Bonato L.L.; Aguiar D.P.; Vieira T.; Almeida F.L.D.; Lobo J.C.; Jordão M.; Lomardo P.G.; Granjeiro J.M.; Casado P.L. | 2018 |
| Nitric oxide and arginase levels in peri-implant tissues after delayed loading                                                                                                                                                              | Gokmenoglu C.; Ozmeric N.; Sungur C.; Sahin Bildik R.; Erguder I.; Elgun S.                                                                                                                                    | 2018 |
| The effect of smoking on peri-implant marginal bone loss in periodontally compromised patients                                                                                                                                              | Meric P.; Gurlek O.; Kanmaz B.; Buduneli N.                                                                                                                                                                    | 2018 |
| Minocycline hydrochloride ointment is available for the treatment of peri-implantitis                                                                                                                                                       | Liu O.; Gao Z.; Li T.; Zhou B.                                                                                                                                                                                 | 2018 |
| Peri-implant Crestal Bone Changes Around Zirconia Implants in Periodontally Healthy and Compromised Patients                                                                                                                                | Kniha K.; Milz S.; Kniha H.; Ayoub N.; Hölzle F.; Modabber A.                                                                                                                                                  | 2018 |
| Performance and marginal bone level alteration around immediately loaded narrow-diameter implants. A prospective clinical study: Results after 1 year                                                                                       | Worni A.; Hicklin S.P.; Mericske-Stern R.; Enkling N.                                                                                                                                                          | 2018 |
| Effects of modified abutment characteristics on peri-implant soft tissue health: A systematic review and meta-analysis                                                                                                                      | Sanz-Martin I.; Sanz-Sánchez I.; Carrillo de Albornoz A.; Figuero E.; Sanz M.                                                                                                                                  | 2018 |
| What is the survival rate of dental implants in Turkey? A systematic review                                                                                                                                                                 | Cabbar F.; Burdurlu M.Ç.; Işıkşayan N.S.; Atalay B.; Çapar G.D.                                                                                                                                                | 2018 |
| One-Piece Implants with Smooth Concave Neck to Enhance Soft Tissue Development and Preserve Marginal Bone Levels: A Retrospective Study with 1- to 6-Year Follow-Up                                                                         | Axiotis J.-P.; Nuzzolo P.; Barausse C.; Gasparro R.; Bucci P.; Pistilli R.; Sammartino G.; Felice P.                                                                                                           | 2018 |
| Surface characteristics of dental implants: A review                                                                                                                                                                                        | Rupp F.; Liang L.; Geis-Gerstorfer J.; Scheideler L.; Hüttig F.                                                                                                                                                | 2018 |
| Peri-implant tissue score (PITS) as a measure of success, applied to 869 dental implants from a retrospective clinical study                                                                                                                | Mazur Z.; Korábek L.; Mazur D.                                                                                                                                                                                 | 2018 |
| One-piece zirconia oral implants for single-tooth replacement: Three-year results from a long-term prospective cohort study                                                                                                                 | Kohal R.-J.; Spies B.C.; Bauer A.; Butz F.                                                                                                                                                                     | 2018 |
| Immediate, early (6 weeks) and delayed loading (3 months) of single, partial and full fixed implant supported prostheses: 1-year post-loading data from a multicentre randomised controlled trial                                           | Mitsias M.; Siormpas K.; Pistilli V.; Trullenque-Eriksson A.; Esposito M.                                                                                                                                      | 2018 |
| Posterior atrophic jaws rehabilitated with prostheses supported by 6 mm long × 4 mm wide implants or by longer implants in augmented bone. 3-year post-loading results from a randomised controlled trial                                   | Felice P.; Barausse C.; Pistilli V.; Piattelli M.; Ippolito D.R.; Esposito M.                                                                                                                                  | 2018 |
| Posterior atrophic jaws rehabilitated with prostheses supported by 5 × 5 mm implants with a nanostructured calcium-incorporated titanium surface or by longer implants in augmented bone. 3-year results from a randomised controlled trial | Gastaldi G.; Felice P.; Pistilli V.; Barausse C.; Ippolito D.R.; Esposito M.                                                                                                                                   | 2018 |
| Effect of implantoplasty on fracture resistance and surface roughness of standard diameter dental implants                                                                                                                                  | Costa-Berenguer X.; García-García M.; Sánchez-Torres A.; Sanz-Alonso M.; Figueiredo R.; Valmaseda-Castellón E.                                                                                                 | 2018 |
| 4 mm long vs longer implants in augmented bone in posterior atrophic jaws: 1-year post-loading results from a multicentre randomised controlled trial                                                                                       | Bolle C.; Felice P.; Barausse C.; Pistilli V.; Trullenque-Eriksson A.; Esposito M.                                                                                                                             | 2018 |
| One Abutment at One Time Concept for Platform-Switched Morse Implants: Systematic Review and Meta-Analysis                                                                                                                                  | Santos J.S.; Santos T.S.; Martins-Filho P.R.S.; Krockow N.V.; Weigl P.; Pablo H.                                                                                                                               | 2018 |
| Volumetric Bone Measurement Around Dental Implants Using 3D Image Superimposition: A Methodological and Clinical Pilot Study                                                                                                                | Villarinho E.A.; Correia A.; Vigo A.; Ramos N.V.; Pires Vaz M.A.; Arai Shinkai R.S.                                                                                                                            | 2018 |
| Bone Regeneration of Peri-Implant Defects Using a Collagen Membrane as a Carrier for Recombinant Human Bone Morphogenetic Protein-2                                                                                                         | Sun Y.-K.; Cha J.-K.; Thoma D.S.; Yoon S.-R.; Lee J.-S.; Choi S.-H.; Jung U.-W.                                                                                                                                | 2018 |
| Prevalence of Dental Implants and Evaluation of Peri-implant Bone Levels in Patients Presenting to a Dental School: A Radiographic Cross-Sectional 2-Year Study                                                                             | Alkan E.A.; Mau L.P.; Schoolfield J.; Guest G.F.; Cochran D.L.                                                                                                                                                 | 2018 |
| Tobacco use, nicotine, and oral microorganisms                                                                                                                                                                                              | Hanioka T.; Ojima M.; Ogawa H.                                                                                                                                                                                 | 2018 |
| Raloxifene but not alendronate can compensate the impaired osseointegration in osteoporotic rats                                                                                                                                            | Faverani L.P.; Polo T.O.B.; Ramalho-Ferreira G.; Momesso G.A.C.; Hassumi J.S.; Rossi A.C.; Freire A.R.; Prado F.B.; Luvizuto E.R.; Gruber R.; Okamoto R.                                                       | 2018 |
| A New Prognostication System for Dental Implants                                                                                                                                                                                            | Najafi B.; Khairieh P.; Torabi A.; Cappetta E.G.; Najafi A.; Singh S.M.                                                                                                                                        | 2018 |
| Peri-implant bone resorption during healing abutment placement: The effect of a 0.20% chlorhexidine gel vs. Placebo—a randomized double blind controlled human study                                                                        | Sinjari B.; D'Addazio G.; De Tullio I.; Traini T.; Caputi S.                                                                                                                                                   | 2018 |
| A systematic review and meta-analysis of long-term studies (five or more years) assessing maxillary sinus floor augmentation                                                                                                                | Starch-Jensen T.; Aludden H.; Hallman M.; Dahlin C.; Christensen A.-E.; Mordenfeld A.                                                                                                                          | 2018 |
| The role of dental implant abutment design on the aesthetic outcome: preliminary 3-month post-loading results from a multicentre split-mouth randomised controlled trial comparing two different abutment designs                           | Esposito M.; Cardaropoli D.; Gobbato L.; Scutellà F.; Fabianelli A.; Mascellani S.; Delli Ficorelli G.; Mazzocco F.; Sbricoli L.; Trullenque-Eriksson A.                                                       | 2018 |
| Immediate definitive individualized abutments reduce peri-implant bone loss: a randomized controlled split-mouth study on 16 patients                                                                                                       | Erhan Çömlekoğlu M.; Nizam N.; Çömlekoğlu M.D.                                                                                                                                                                 | 2018 |

|                                                                                                                                                                                                                  |                                                                                                                                                                                                                                                   |      |
|------------------------------------------------------------------------------------------------------------------------------------------------------------------------------------------------------------------|---------------------------------------------------------------------------------------------------------------------------------------------------------------------------------------------------------------------------------------------------|------|
| Effect of DSR-based internal sinus floor elevation with implantation on atrophic maxilla                                                                                                                         | Li F.; Wang Y.-H.; Wang D.-S.; Wang W.-X.; Jiang S.; Jin H.-Y.; Gao L.; Teng M.-H.; Liang J.-Y.; Chu Y.-N.; Zhi K.-Q.; Zhao B.-D.                                                                                                                 | 2018 |
| Local bone treatment in osteoporosis                                                                                                                                                                             | Kurth A.                                                                                                                                                                                                                                          | 2018 |
| A rare case of thoracic endometriosis presenting with hemopneumothorax                                                                                                                                           | Yang X.; Steiger D.; Miyakawa L.; Filopei J.                                                                                                                                                                                                      | 2018 |
| Repercussion of a national intervention on patient outcomes of primary knee arthroplasty to enhance the recovery pathway: 2008-2016 England trends                                                               | Garriga C.; Prats-Urbe A.; Price A.; Prieto-Alhambra D.; Carr A.; Arden N.K.; Leal J.; Gooberman-Hill R.; Peat G.; Rangan A.; Fitzpatrick R.; Barker K.; Cooper C.; Judge A.                                                                      | 2018 |
| Fracture neck of femur - A local experience                                                                                                                                                                      | Ong L.H.; Sabaruddin A.; Rutel A.; Jaffar M.S.A.; Kamaruddin F.                                                                                                                                                                                   | 2018 |
| Recurrent stenosis following carotid artery stenting treated with a drug-eluting balloon: a single-center retrospective analysis                                                                                 | Pohlmann C.; Hölzle J.; Zeile M.; Bonk F.; Urban P.P.; Brünig R.                                                                                                                                                                                  | 2018 |
| Response of soft tissue to different abutment materials with different surface topographies: a review of the literature                                                                                          | Al Rezk F.; Trimpou G.; Lauer H.-C.; Weigl P.; Krockow N.                                                                                                                                                                                         | 2018 |
| Cavernous sinus thrombosis in a patient using etonogestrel/ethinyl estradiol vaginal ring                                                                                                                        | Selim M.A.; Kassim T.A.; Rakhra A.; Jabbari J.; Valenta C.                                                                                                                                                                                        | 2018 |
| Safety and feasibility of angioplasty and stenting in symptomatic internal carotid artery occlusive disease                                                                                                      | Panczykowski D.M.; Jadhav A.P.; Jumaa M.A.; Aghaebrahim A.; Ranginani M.; Nguyen F.; Grandhi R.; Ducruet A.F.; Gross B.A.; Jankowitz B.T.; Jovin T.G.                                                                                             | 2018 |
| Experimental pilot study of combined thoracoscopic surgical stapling and intrabronchial valve intervention for incomplete lobar fissures in swine                                                                | Kheir F.; Gangadharan S.; Alape D.; Chee A.C.; Parikh M.S.; DeVore L.; Agnew A.; Majid A.                                                                                                                                                         | 2018 |
| Percutaneous patent foramen ovale closure for the secondary prevention of cryptogenic cerebral ischemia: A network meta-analysis                                                                                 | Tsivgoulis G.; Katsanos A.H.; Mavridis D.; Frogoudaki A.; Vrettou A.-R.; Ikonomidis I.; Parissis J.; Deftereos S.; Karapanayiotides T.; Palaodimou L.; Filippatou A.; Perren F.; Hadjigeorgiou G.; Alexandrov A.W.; Mitsias P.D.; Alexandrov A.V. | 2018 |
| Prevalence of Epstein-Barr virus DNA and Porphyromonas gingivalis in Japanese peri-implantitis patients                                                                                                          | Kato A.; Imai K.; Sato H.; Ogata Y.                                                                                                                                                                                                               | 2017 |
| Influence of implantoplasty on stress distribution of exposed implants at different bone insertion levels                                                                                                        | Tribst J.P.M.; Dal Piva A.M.O.; Shibli J.A.; Borges A.L.S.; Tango R.N.                                                                                                                                                                            | 2017 |
| Immediately loaded implant-supported full-arches: Peri-implant status after 1-9years in a private practice                                                                                                       | Cercadillo-Ibarguren I.; Sánchez-Torres A.; Figueiredo R.; Schwarz F.; Gay-Escoda C.; Valmaseda-Castellón E.                                                                                                                                      | 2017 |
| A retro-prospective effectiveness study on 3448 implant operations at one referral clinic: A multifactorial analysis. Part II: Clinical factors associated to peri-implantitis surgery and late implant failures | Jemt T.                                                                                                                                                                                                                                           | 2017 |
| Mandibular Osteomyelitis Following Implant Placement                                                                                                                                                             | Schlund M.; Raoul G.; Ferri J.; Nicot R.                                                                                                                                                                                                          | 2017 |
| Can resonance frequency analysis detect narrow marginal bone defects around dental implants? An ex vivo animal pilot study                                                                                       | Yao C.J.; Ma L.; Mattheos N.                                                                                                                                                                                                                      | 2017 |
| Parameters to Define Peri-Implantitis: A Review and a Proposed Multi-Domain Scale                                                                                                                                | Lin G.-H.; Kapila Y.; Wang H.-L.                                                                                                                                                                                                                  | 2017 |
| Randomized controlled clinical trial comparing one-piece and two-piece dental implants supporting fixed and removable dental prostheses: 4- to 6-year observations                                               | Gamper F.B.; Benic G.I.; Sanz-Martin I.; Asgeirsson A.G.; Hämmerle C.H.F.; Thoma D.S.                                                                                                                                                             | 2017 |
| The effect of antimicrobial photodynamic therapy (APDT) and light-activated disinfection (LAD) on contaminated titanium and zirconia implants-in vitro study                                                     | Azizi B.; Budimir A.; Mehmeti B.; Kelmendi J.; Gabric D.                                                                                                                                                                                          | 2017 |
| Short implants (6 mm) vs. vertical bone augmentation and standard-length implants (≥9 mm) in atrophic posterior mandibles: a 5-year retrospective study                                                          | Pieri F.; Forlivesi C.; Caselli E.; Corinaldesi G.                                                                                                                                                                                                | 2017 |
| Radiographic and clinical outcomes of rooted, platform-switched, microthreaded implants with a sandblasted, large-grid, and acid-etched surface: A 5-year prospective study                                      | Mei D.M.; Zhao B.; Xu H.; Wang Y.                                                                                                                                                                                                                 | 2017 |
| Assessment of the effectiveness of platelet rich fibrin in the treatment of Schneiderian membrane perforation                                                                                                    | Öncü E.; Kaymaz E.                                                                                                                                                                                                                                | 2017 |
| Survival rate of titanium-zirconium narrow diameter dental implants versus commercially pure titanium narrow diameter dental implants: A systematic review                                                       | Iegami C.M.; Uehara P.N.; Sesma N.; Pannuti C.M.; Tortamano Neto P.; Mukai M.K.                                                                                                                                                                   | 2017 |
| Long-term evaluation of osteotome sinus floor elevation and simultaneous placement of implants without bone grafts: 10-Year radiographic and clinical follow-up                                                  | Caban J.; Fermergård R.; Abtahi J.                                                                                                                                                                                                                | 2017 |
| Maxillary implant-supported overdentures opposed by (partial) natural dentitions: a 5-year prospective case series study                                                                                         | Boven G.C.; Slot J.W.A.; Raghoobar G.M.; Vissink A.; Meijer H.J.A.                                                                                                                                                                                | 2017 |
| Prognostic Classification System for Implant Recession Defects                                                                                                                                                   | Decker A.M.; Suárez-López Del Amo F.; Urban I.A.; Miller P.D.; Wang H.-L.                                                                                                                                                                         | 2017 |
| The influence of crown-to-implant ratio on marginal bone levels around splinted short dental implants: A radiological and clinical short term analysis                                                           | Hingsammer L.; Watzek G.; Pommer B.                                                                                                                                                                                                               | 2017 |
| Organic degradation potential of a TiO2/H2O2/UV-vis system for dental applications                                                                                                                               | Janson O.; Unosson E.; Strømme M.; Engqvist H.; Welch K.                                                                                                                                                                                          | 2017 |
| A particularly case of tricuspid valve endocarditis due to jet lesion in a patient with congenital heart disease                                                                                                 | Dentamaro I.; Gutierrez Garcia-Moreno L.; Fernandez-Galera R.; Gonzalez-Alujas M.T.; Villalva N.; Granato C.; Italiano G.; Espriu Simon M.; Rodriguez-Palomares J.F.; Evangelista Masip A.                                                        | 2017 |
| The role of intravascular ultrasound in lower limb revascularization in patients with peripheral arterial disease                                                                                                | Makris G.C.; Chryrsafi P.; Little M.; Patelat R.; Ratby M.B.; Wigham A.; Anthony S.; Uberoi R.                                                                                                                                                    | 2017 |

|                                                                                                                                                                                                                          |                                                                                                                                               |      |
|--------------------------------------------------------------------------------------------------------------------------------------------------------------------------------------------------------------------------|-----------------------------------------------------------------------------------------------------------------------------------------------|------|
| Self expanding metallic stents placement-A tertiary care experience                                                                                                                                                      | Radhakrishnan N.; Rabindranath E.; Sheikh M.K.; Kini S.R.; Kumar K.P.                                                                         | 2017 |
| Hydromorphone Hydrochloride Use During Various Interventional Radiology Procedures—Pain Control and Adverse Events: A Case Series Audit Analysis                                                                         | Moran T.; Prabhakar A.; Diaz J.H.; Kaye A.D.                                                                                                  | 2017 |
| Location of unaccessible implant surface areas during debridement in simulated peri-implantitis therapy                                                                                                                  | Steiger-Ronay V.; Merlini A.; Wiedemeier D.B.; Schmidlin P.R.; Attin T.; Sahrmann P.                                                          | 2017 |
| Peri-implant maintenance therapy: Association of preventive maintenance therapy compliance and peri-implant disease: A cross-sectional study                                                                             |                                                                                                                                               | 2017 |
| Long-term follow up of implant therapy: Occurrence of cases with peri-implant mucositis or peri-implantitis in a 21-26-year follow-up study                                                                              |                                                                                                                                               | 2017 |
| Anti-Bacteria and Microecosystem-Regulating Effects of Dental Implant Coated with Dimethylaminodecyl Methacrylate                                                                                                        | Li B.; Ge Y.; Wu Y.; Chen J.; Xu H.H.K.; Yang M.; Li M.; Ren B.; Feng M.; Weir M.D.; Peng X.; Cheng L.; Zhou X.                               | 2017 |
| Peri-procedural myocardial infarction: Plaques and patients “at-risk”                                                                                                                                                    | Goldstein J.A.                                                                                                                                | 2017 |
| VASO (Vitamin D and Arthroplasty Surgery Outcomes) study - supplementation of vitamin D deficiency to improve outcomes after total hip or knee replacement: Study protocol for a randomised controlled feasibility trial | Morrison R.J.M.; Bunn D.; Gray W.K.; Baker P.N.; White C.; Rangan A.; Rankin K.S.; Reed M.R.                                                  | 2017 |
| Air-abrasive debridement with glycine powder versus manual debridement and chlorhexidine administration for the maintenance of peri-implant health status: a six-month randomized clinical trial                         | Lupi S.M.; Granati M.; Butera A.; Collesano V.; Rodriguez Y Baena R.                                                                          | 2017 |
| Patient-Centered Perspectives and Understanding of Peri-Implantitis                                                                                                                                                      | Insua A.; Monje A.; Wang H.-L.; Inglehart M.                                                                                                  | 2017 |
| Classification and Clinical Management of Retrograde Peri-implantitis Associated with Apical Periodontitis: A Proposed Classification System and Case Report                                                             | Sarmast N.D.; Wang H.H.; Sajadi A.S.; Angelov N.; Dorn S.O.                                                                                   | 2017 |
| Microbiome of peri-implantitis affected and healthy dental sites in patients with a history of chronic periodontitis                                                                                                     | Apatzidou D.; Lappin D.F.; Hamilton G.; Papadopoulos C.A.; Konstantinidis A.; Riggio M.P.                                                     | 2017 |
| Implant-Abutment Connections: A Review of Biologic Consequences and Peri-implantitis Implications                                                                                                                        | Sasada Y.; Cochran D.L.                                                                                                                       | 2017 |
| Periapical implant lesion: A systematic review                                                                                                                                                                           | Blaya-Tárraga J.-A.; Cervera-Ballester J.; Peñarrocha-Oltra D.; Peñarrocha-Diogo M.                                                           | 2017 |
| The effect of metal ions released from different dental implant-abutment couples on osteoblast function and secretion of bone resorbing mediators                                                                        | Alrabeah G.O.; Brett P.; Knowles J.C.; Petridis H.                                                                                            | 2017 |
| Compliance with Supportive Periodontal Treatment in Patients with Dental Implants                                                                                                                                        | Hu K.-F.; Lin Y.-C.; Ho K.-Y.; Chou Y.-H.                                                                                                     | 2017 |
| Intra-surgical vs. radiographic bone level assessments in measuring peri-implant bone loss                                                                                                                               | Serino G.; Sato H.; Holmes P.; Turri A.                                                                                                       | 2017 |
| Peri-implant bleeding on probing: a cross-sectional multilevel analysis of associated factors                                                                                                                            | Merli M.; Bernardelli F.; Giulianelli E.; Toselli I.; Mariotti G.; Nieri M.                                                                   | 2017 |
| Associations of alveolar bone loss and interleukin-1 $\beta$ levels in one- and two-stage surgical procedures: a randomized prospective trial                                                                            | Talo Yildirim T.; Acun Kaya F.; Yokus B.; Colak M.; Ozdemir Kaya E.; Tekin G.; Saribas E.; Uysal E.; Guncu G.N.                               | 2017 |
| Peri-Implantitis: A multiwavelength approach                                                                                                                                                                             | Rocca J.P.; Zhang Y.; Merigo E.; Zhen Y.; Fornaini C.; Zhao Z.                                                                                | 2017 |
| Laser minimally invasive bactericidal approach for the 21 century dentistry                                                                                                                                              | Kornblit R.                                                                                                                                   | 2017 |
| Soft tissue changes and crestal bone loss around platform-switched implants placed at crestal and subcrestal levels: 36-month results from a prospective split-mouth clinical trial                                      | Al Amri M.D.; Al-Johany S.S.; Al Baker A.M.; Al Rifaiy M.Q.; Abduljabbar T.S.; Al-Kheraif A.A.                                                | 2017 |
| Does local delivery of bisphosphonates influence the osseointegration of titanium implants? A systematic review                                                                                                          | Guimarães M.B.; Antes T.H.; Dolacio M.B.; Pereira D.D.; Markezan M.                                                                           | 2017 |
| Early bone formation around immediately loaded implants with nanostructured calcium-incorporated and machined surface: a randomized, controlled histologic and histomorphometric study in the human posterior maxilla    | Mangano F.G.; Iezzi G.; Shibli J.A.; Pires J.T.; Luongo G.; Piattelli A.; Mangano C.                                                          | 2017 |
| Implant maintenance for the prevention of biological complications: Are you ready for the next challenge?                                                                                                                | Goh E.X.J.; Lim L.P.                                                                                                                          | 2017 |
| Comparison of peri-implant bone loss between conventional drilling with irrigation versus low-speed drilling without irrigation                                                                                          | Pellicer-Chover H.; Peñarrocha-Oltra D.; Aloy-Prosper A.; Sanchis-Gonzalez J.-C.; Peñarrocha-Diogo M.; Peñarrocha-Diogo M.                    | 2017 |
| Peri-Implant Bone Loss of External Hexagon and Morse Taper in Patients Wearing Immediately Loaded Overdentures                                                                                                           | Melo L.A.; Souza M.B.C.; Barbosa G.A.S.; Carreiro A.D.F.P.                                                                                    | 2017 |
| Simultaneous lateral bone augmentation and implant placement using a particulated synthetic bone substitute around chronic peri-implant dehiscence defects in dogs                                                       | Jung U.-W.; Cha J.-K.; Vignoletti F.; Nuñez J.; Sanz J.; Sanz M.                                                                              | 2017 |
| Partial humeral replacement for peri-prosthetic fractures of the humerus                                                                                                                                                 | Manohara R.; Howie C.R.                                                                                                                       | 2017 |
| Aberrant artery identified during necrosectomy for walled-off pancreatic necrosis                                                                                                                                        | Queliza K.; Fishman D.                                                                                                                        | 2017 |
| Stabilizing peri-stent restenosis using a novel therapeutic carrier                                                                                                                                                      | Moody M.R.; Huang S.-L.; Kim H.; Yin X.; Peng T.; Laing S.T.; Klegerman M.E.; Genstler C.; Haworth K.J.; Holland C.K.; McPherson D.D.; Kee P. | 2017 |
| Is using bisphosphonate a contraindication for dental treatments?                                                                                                                                                        | Heidari M.; Motevali S.; Mabooodi A.; Sobouti F.                                                                                              | 2017 |
| Comparison of two different techniques used for the maintenance of peri-implant soft tissue health: a pilot randomized clinical trial                                                                                    | Al Ghazal L.; O'Sullivan J.; Claffey N.; Polyzois I.                                                                                          | 2017 |

|                                                                                                                                                                                                                         |                                                                                                                                                                                 |      |
|-------------------------------------------------------------------------------------------------------------------------------------------------------------------------------------------------------------------------|---------------------------------------------------------------------------------------------------------------------------------------------------------------------------------|------|
| Association of Preventive Maintenance Therapy Compliance and Peri-Implant Diseases: A Cross-Sectional Study                                                                                                             | Monje A.; Wang H.-L.; Nart J.                                                                                                                                                   | 2017 |
| Failing to meet the goals of periodontal recall programs. What next?                                                                                                                                                    | McCracken G.; Asuni A.; Ritchie M.; Vernazza C.; Heasman P.                                                                                                                     | 2017 |
| Comparison of clinical and radiographic parameters around short (6 to 8 mm in length) and long (11 mm in length) dental implants placed in patients with and without type 2 diabetes mellitus: 3-year follow-up results | Al Amri M.D.; Abduljabbar T.S.; Al-Johany S.S.; Al Rifaiy M.Q.; Alfarraj Aldosari A.M.; Al-Kheraif A.A.                                                                         | 2017 |
| Implant rehabilitation in fibula-free flap reconstruction: A retrospective study of cases at 1–18 years following surgery                                                                                               | Sozzi D.; Novelli G.; Silva R.; Connelly S.T.; Tartaglia G.M.                                                                                                                   | 2017 |
| Zirconia abutments for single-tooth implant restorations: a 10- to 11-year follow-up study                                                                                                                              | Ekfeldt A.; Fürst B.; Carlsson G.E.                                                                                                                                             | 2017 |
| Clinical, radiological, and gene expression analyses in smokers and non-smokers, Part 2: RCT on the late healing phase of osseointegration                                                                              | Sayardoust S.; Omar O.; Norderyd O.; Thomsen P.                                                                                                                                 | 2017 |
| Comparison of Dental Implant Performance Following Vertical Alveolar Bone Augmentation With Alveolar Distraction Osteogenesis or Autogenous Onlay Bone Grafts: A Retrospective Cohort Study                             | Zhao K.; Wang F.; Huang W.; Wang X.; Wu Y.                                                                                                                                      | 2017 |
| Influence of different forms and materials (zirconia or titanium) of abutments in peri-implant soft-tissue healing using matrix metalloproteinase-8: A randomized pilot study                                           | Kumar Y.; Jain V.; Chauhan S.S.; Bharate V.; Koli D.; Kumar M.                                                                                                                  | 2017 |
| Immediate dental implant placement following sinus elevation in maxillary bone levels less than 6mm                                                                                                                     | Young H.; Kwok J.; Patel D.; Patel V.                                                                                                                                           | 2017 |
| Current Evidence on the Socket-Shield Technique: A Systematic Review                                                                                                                                                    | Gharpure A.S.; Bhatavadekar N.B.                                                                                                                                                | 2017 |
| Effects of Four Different Crown Materials on the Peri-Implant Clinical Parameters and Composition of Peri-Implant Crevicular Fluid                                                                                      | Yu S.-J.; Shan W.-L.; Liu Y.-X.; Huang X.-Y.; Zhu G.-X.                                                                                                                         | 2017 |
| Randomized clinical study of the peri-implant healing to hydrophilic and hydrophobic implant surfaces in patients receiving anticoagulants                                                                              | Marković A.; Đinić A.; Calvo Guirado J.L.; Tahmaseb A.; Šćepanović M.; Janjić B.                                                                                                | 2017 |
| Effect of prosthetic restoration on implant survival and success                                                                                                                                                        | Rammelsberg P.; Lorenzo-Bermejo J.; Kappel S.                                                                                                                                   | 2017 |
| The role of IL-1 gene polymorphisms (IL1A, IL1B, and IL1RN) as a risk factor in unsuccessful implants retaining overdentures                                                                                            | Sampaio Fernandes M.; Vaz P.; Braga A.C.; Sampaio Fernandes J.C.; Figueiral M.H.                                                                                                | 2017 |
| Osteoarthritis-associated calcium-containing crystals and biomaterial microparticles both drive m1 macrophage polarization in a syk and map kinase-dependent manner                                                     | McCarthy G.M.; Mahon O.; O'Hanlon S.; Kelly D.; Dunne A.                                                                                                                        | 2017 |
| Post dental implant neuro integration around or remote?                                                                                                                                                                 | Tewari S.; Sharma R.K.; Narula S.C.; Bala K.; Tanwar N.                                                                                                                         | 2017 |
| Long-Term Clinical and Radiographic Observation of Periimplant Tissues After Autogenous Soft Tissue Grafts: A 15-Year Retrospective Study                                                                               | Park W.-B.; Kang K.L.; Han J.-Y.                                                                                                                                                | 2017 |
| In-vitro cytocompatibility of dental resin monomers on osteoblast-like cells                                                                                                                                            | Kraus D.; Wolfgarten M.; Enkling N.; Helfgen E.-H.; Frentzen M.; Probstmeier R.; Winter J.; Stark H.                                                                            | 2017 |
| Immediate Early and Delayed Implants: A 2-Year Prospective Cohort Study of 131 Transmucosal Flapless Implants Placed in Sites With Different Pre-extractive Endodontic Infections                                       | Prati C.; Zamparini F.; Pirani C.; Gatto M.R.; Piattelli A.; Gandolfi M.G.                                                                                                      | 2017 |
| One-time versus repeated abutment connection for platform-switched implant: A systematic review and meta-analysis                                                                                                       | Wang Q.-Q.; Dai R.; Cao C.Y.; Fang H.; Han M.; Li Q.-L.                                                                                                                         | 2017 |
| Increasing popularity of waterpipe tobacco smoking and electronic cigarette use: Implications for oral healthcare                                                                                                       | Ramôa C.P.; Eissenberg T.; Sahingur S.E.                                                                                                                                        | 2017 |
| Patient self-reported pain and contributing factors during the implant of cardiac implantable electronic devices                                                                                                        | Brewster N.; Wilson D.; Foster W.; Taylor R.; Goyal D.                                                                                                                          | 2017 |
| Short-term dabigatran interruption before cardiac rhythm device implantation: Multi-centre experience from the RE-LY trial                                                                                              | Essebag V.; Proietti R.; Birnie D.H.; Wang J.; Douketis J.; Coutu B.; Parkash R.; Lip G.Y.H.; Hohnloser S.H.; Moriarty A.; Oldgren J.; Connolly S.J.; Ezekowitz M.; Healey J.S. | 2017 |
| Sevelamer-associated rectosigmoid ulcers in an end-stage renal disease patient presenting as hematochezia                                                                                                               | Uy P.P.D.                                                                                                                                                                       | 2017 |
| Preliminary audiologic and peri-operative outcomes of the Sophono™ transcutaneous bone conduction device: A systematic review                                                                                           | Bezdzian A.; Bruijnzeel H.; Daniel S.J.; Grolman W.; Thomeer H.G.X.M.                                                                                                           | 2017 |
| Outcomes After Primary Percutaneous Coronary Intervention for ST-Elevation Myocardial Infarction Caused by Ectatic Infarct Related Arteries                                                                             | Bogana Shanmugam V.; J. Psaltis P.; T.L. Wong D.; T. Meredith I.; Malaipayan Y.; Ahmar W.                                                                                       | 2017 |
| Intracardiac Echocardiography for Structural Heart and Electrophysiological Interventions                                                                                                                               | Basman C.; Parmar Y.J.; Kronzon I.                                                                                                                                              | 2017 |
| Single-center retrospective review of ultrasound-accelerated versus traditional catheter-directed thrombolysis for acute lower extremity deep venous thrombosis                                                         | Lu T.; Loh T.M.; El-Sayed H.F.; Davies M.G.                                                                                                                                     | 2017 |
| Decreasing Surgical Site Infections after Ventral Hernia Repair: A Quality-Improvement Initiative                                                                                                                       | Cherla D.V.; Holihan J.L.; Flores-Gonzalez J.R.; Lew D.F.; Escamilla R.J.; Ko T.C.; Kao L.S.; Liang M.K.                                                                        | 2017 |
| Tb of porta hepatitis presenting with obstructive Jaundice: A case report                                                                                                                                               | Alsabbak H.; Zakharia K.; Malik A.; Ashraf H.; Sunstrum J.                                                                                                                      | 2017 |
| Silver-coated modular Megaendoprostheses in salvage revision arthroplasty after periimplant infection with extensive bone loss - A pilot study of 34 patients                                                           | Zajonz D.; Birke U.; Ghanem M.; Prietzel T.; Josten C.; Roth A.; Fakler J.K.M.                                                                                                  | 2017 |
| Association of Cytokine Gene Polymorphism with Peri-implantitis Risk                                                                                                                                                    | Petkovic-Curcin A.; Zeljic K.; Cikota-Aleksic B.; Dakovic D.; Tatic Z.; Magic Z.                                                                                                | 2017 |
| Retrospective Analysis on Survival Rate, Template-Related Complications, and Prevalence of Peri-implantitis of 694 Anodized Implants Placed Using Computer-Guided Surgery: Results Between 1 and 10 Years of Follow-Up  | Tallarico M.; Meloni S.M.                                                                                                                                                       | 2017 |

|                                                                                                                                                                                                                                             |                                                                                                                                                              |      |
|---------------------------------------------------------------------------------------------------------------------------------------------------------------------------------------------------------------------------------------------|--------------------------------------------------------------------------------------------------------------------------------------------------------------|------|
| Prognosis of Dental Implants Immediately Placed in Sockets Affected by Peri-implantitis: A Retrospective Pilot Study                                                                                                                        | Anitua E.; Piñas L.; Begoña L.; Alkhraisat M.H.                                                                                                              | 2017 |
| Influence of implant location in patients with and without type 2 diabetes mellitus: 2-year follow-up                                                                                                                                       | Abduljabbar T.; Javed F.; Malignaggi V.R.; Vohra F.; Kellesarian S.V.                                                                                        | 2017 |
| Implant Patient Compliance Varies by Periodontal Treatment History                                                                                                                                                                          | Zeza B.; Pilloni A.; Tatakis D.N.; Mariotti A.; Di Tanna G.L.; Mongardini C.                                                                                 | 2017 |
| Evaluation of four designs of short implants placed in atrophic areas with reduced bone height: a three-year, retrospective, clinical and radiographic study                                                                                | Lopez Torres J.A.; Gehrke S.A.; Calvo Guirado J.L.; Aristazábal L.F.R.                                                                                       | 2017 |
| Comparison of Proinflammatory Cytokine Levels in Gingival Crevicular Fluid around Dental Implants with Ceramic and Titanium Abutments                                                                                                       | Negahdari R.; Rahbar M.; Fakhrzadeh V.; Eslami H.; Akbari T.; Bohluli S.                                                                                     | 2017 |
| Impact of implant-abutment connection on osteoimmunological and microbiological parameters in short implants: a randomized controlled clinical trial                                                                                        | Öztürk V.Ö.; Emingil G.; Bostanci N.; Belibasakis G.N.                                                                                                       | 2017 |
| Rehabilitation of patients with extreme mandibular alveolar ridge atrophy by means of slim and short mini dental implants and mandibular overdenture                                                                                        | Kovacic I.; Kiršic S.P.; Celebic A.                                                                                                                          | 2017 |
| Immediate implant placement into fresh extraction sockets versus delayed implants into healed sockets: A systematic review and meta-analysis                                                                                                | Mello C.C.; Lemos C.A.A.; Verri F.R.; dos Santos D.M.; Goiato M.C.; Pellizzer E.P.                                                                           | 2017 |
| Long-Term Retrospective Evaluation of Success of Narrow-Diameter Implants in Esthetic Areas: A Consecutive Case Series with 3 to 14 Years Follow-up                                                                                         | Froum S.J.; Shi Y.; Fisselir F.; Cho S.-C.                                                                                                                   | 2017 |
| Assessment of the gingival microcirculation at teeth and dental implants; A preclinical in-vivo pilot study                                                                                                                                 | Deák A.; Fülöp Z.S.; Tanczos B.; Sógor V.; Sári K.; Varga I.; Németh N.; Stavropoulos A.; Hegedus C.S.                                                       | 2017 |
| Early volumetric changes after vertical augmentation of the atrophic posterior mandible with interpositional block graft versus onlay bone graft: A retrospective radiological study                                                        | Barone A.; Toti P.; Menchini-Fabris G.-B.; Felice P.; Marchionni S.; Covani U.                                                                               | 2017 |
| Three-year Prospective Evaluation of Immediately Loaded Mandibular Implant Overdentures retained with Locator Attachments                                                                                                                   | Al-Dharab A.                                                                                                                                                 | 2017 |
| Breast implant-associated anaplastic large cell lymphoma: A review and assessment of cutaneous manifestations                                                                                                                               | Shahriari N.; Ferenczi K.; Heald P.W.                                                                                                                        | 2017 |
| Influence of Abutment Height on Maintenance of Peri-implant Crestal Bone at Bone-Level Implants: A 3-Year Follow-up Study                                                                                                                   | Nóvoa L.; Batalla P.; Caneiro L.; Pico A.; Liñares A.; Blanco J.                                                                                             | 2017 |
| New approach to improve the keratinised peri-implant soft tissues in patients with intraoral osteocutaneous reconstruction using a free flap                                                                                                | Patel N.; Patel D.; Kwok J.                                                                                                                                  | 2017 |
| Interproximal Papilla Stability Around CAD/CAM and Stock Abutments in Anterior Regions: A 2-Year Prospective Multicenter Cohort Study                                                                                                       | Lops D.; Parpaiola A.; Paniz G.; Sbricoli L.; Magaz V.R.; Venezz A.C.; Bressan E.; Stellini E.                                                               | 2017 |
| How TAVI registries report clinical outcomes—A systematic review of endpoints based on VARC-2 definitions                                                                                                                                   | Zhang S.; Kolominsky-Rabas P.L.                                                                                                                              | 2017 |
| National cohort study of preoperative Bacteriuria, surgical prophylaxis, and postoperative outcomes                                                                                                                                         | Salazar J.G.; Strymish J.; Branch-Elliman W.; Itani K.; O'Brien W.; Gupta K.                                                                                 | 2017 |
| The efficacy and safety of using extension catheters in complex coronary interventions: A single center experience                                                                                                                          | Huang M.-S.; Wu C.-I.; Chang F.-H.; Chang H.-Y.; Lee P.-T.; Chen J.-Y.; Lee W.-H.; Lin C.-C.; Chan S.-H.; Liu P.-Y.; Lee C.-H.                               | 2017 |
| Effect of morbid obesity on mid-urethral sling efficacy for the management of stress urinary incontinence                                                                                                                                   | ElShatanoufy S.; Wang Y.; Matthews A.; Jamil M.L.; Yousif M.; Gutta S.; Gill H.; Luck A.                                                                     | 2017 |
| Logothetopoulos: Control of intraoperative hemorrhage with pelvic pressure pack                                                                                                                                                             | Gonzalez J.; Davidson S.A.; Muffy T.M.                                                                                                                       | 2017 |
| A multi-centre analysis of antibiotic susceptibility of urinary tract isolates in patients with ureteric stents and associated UTI                                                                                                          | McPhee A.; Smyth N.; Hinckley M.; Ho W.; Clark D.; Jones B.; Cottom L.                                                                                       | 2017 |
| Survey of consultants in restorative dentistry in the UK regarding ongoing care of patients provided with dental implants                                                                                                                   | Beddis H.P.; Durey K.A.; Chan M.F.W.Y.                                                                                                                       | 2017 |
| Peri-implant soft-tissue parameters and crestal bone levels among narghile smokers and nonsmokers                                                                                                                                           | Abduljabbar T.; Al-Hamoudi N.; AlQunayan M.; AlAhmari A.; AlMalki A.; Gholamiazizi E.; Vohra F.                                                              | 2017 |
| Chitosan brush for professional removal of plaque in mild peri-implantitis                                                                                                                                                                  | Zeza B.; Wohlfahrt C.; Pilloni A.                                                                                                                            | 2017 |
| Effects of uncontrolled periodontitis on marginal bone alterations around implants: A case-control study                                                                                                                                    | Wang X.; Qin L.; Lei C.; Li Y.; Li D.                                                                                                                        | 2017 |
| Gene expression in peri-implant crevicular fluid of smokers and nonsmokers. 1. The early phase of osseointegration                                                                                                                          | Sayardoust S.; Omar O.; Thomsen P.                                                                                                                           | 2017 |
| Comparison of different maintenance strategies within supportive implant therapy for prevention of peri-implant inflammation during the first year after implant restoration. A randomized, dental hygiene practice-based multicenter study | Ziebolz D.; Klipp S.; Schmalz G.; Schmickler J.; Rinke S.; Kottmann T.; Fresmann S.; Einwig J.                                                               | 2017 |
| Does osteoporosis influence the marginal peri-implant bone level in female patients? A cross-sectional study in a matched collective                                                                                                        | Wagner F.; Schuder K.; Hof M.; Heuberger S.; Seemann R.; Dvorak G.                                                                                           | 2017 |
| Mesenchymal stromal cell and osteoblast responses to oxidized titanium surfaces pre-treated with $\lambda = 808$ nm GaAlAs diode laser or chlorhexidine: in vitro study                                                                     | Chellini F.; Giannelli M.; Tani A.; Ballerini L.; Vallone L.; Nosi D.; Zecchi-Orlandini S.; Sassoli C.                                                       | 2017 |
| Insufficient evidence about benefits of antimicrobial photodynamic therapy as an adjunct to mechanic curettage in smokers with peri-implant mucositis                                                                                       | Brignardello-Petersen R.                                                                                                                                     | 2017 |
| Combination of straight and tilted implants for supporting screw-retained dental prostheses in atrophic posterior maxillae: A 2-year prospective study                                                                                      | Casar-Espinosa J.-C.; Castillo-Oyagüe R.; Serrera-Figallo M.Á.; Garrido-Serrano R.; Lynch C.D.; Menéndez-Collar M.; Torres-Lagares D.; Gutiérrez-Pérez J.-L. | 2017 |

|                                                                                                                                                                                                                                                                                                                                                                         |                                                                                                                                                                                                |      |
|-------------------------------------------------------------------------------------------------------------------------------------------------------------------------------------------------------------------------------------------------------------------------------------------------------------------------------------------------------------------------|------------------------------------------------------------------------------------------------------------------------------------------------------------------------------------------------|------|
| Dental implants in the elderly population: a systematic review and meta-analysis                                                                                                                                                                                                                                                                                        | Srinivasan M.; Meyer S.; Mombelli A.; Müller F.                                                                                                                                                | 2017 |
| Eight-year clinical results of SLA surface implant for dentition defect                                                                                                                                                                                                                                                                                                 | Ren M.-M.; Liu L.-P.; Liu Z.-H.                                                                                                                                                                | 2017 |
| Position paper for the evaluation and management of oral status in patients with valvular disease: Groupe de Travail Valvulopathies de la Société Française de Cardiologie, Société Française de Chirurgie Orale, Société Française de Parodontologie et d'Implantologie Orale, Société Française d'Endodontie et Société de Pathologie Infectieuse de Langue Française | Millot S.; Lesclois P.; Colombier M.-L.; Radoi L.; Messec C.; Ballanger M.; Charrier J.-L.; Tramba P.; Simon S.; Berrebi A.; Doguet F.; Lansac E.; Tribouilloy C.; Habib G.; Duval X.; Iung B. | 2017 |
| Immediate and delayed loading of two-piece reduced-diameter implants with locator-analog attachments in edentulous mandibles: One-year results from a randomized clinical trial examining clinical outcome and patient expectation                                                                                                                                      | Giannakopoulos N.N.; Ariaans K.; Eberhard L.; Klotz A.-L.; Oh K.; Kappel S.                                                                                                                    | 2017 |
| Risk factors for single crowns supported by short (6-mm) implants in the posterior region: A prospective clinical and radiographic study                                                                                                                                                                                                                                | Villarinho E.A.; Triches D.F.; Alonso F.R.; Mezzomo L.A.M.; Teixeira E.R.; Shinkai R.S.A.                                                                                                      | 2017 |
| Dimensional alterations following vertical ridge augmentation using collagen membrane and three types of bone grafting materials: A retrospective observational study                                                                                                                                                                                                   | Park Y.-H.; Choi S.-H.; Cho K.-S.; Lee J.-S.                                                                                                                                                   | 2017 |
| Outcomes in a resource-constrained economy: Results from the multi-centre South African SHARE-TAVI registry                                                                                                                                                                                                                                                             | Weich H.; Scherman J.; Schaafsma E.; Ntsekhe M.                                                                                                                                                | 2017 |
| Contribution of post-stent irregular protrusion to in-stent neoatherosclerosis after second-generation drug-eluting stent implantation. - Optical coherence tomography study-                                                                                                                                                                                           | Sanuki Y.; Shinjo S.; Shimizu A.; Takami H.; Anai R.; Muraoka Y.; Tsuda Y.; Araki M.; Otsuji Y.                                                                                                | 2017 |
| Oral infection with Porphyromonas gingivalis induces peri-implantitis in a murine model: Evaluation of bone loss and the local inflammatory response                                                                                                                                                                                                                    | Tzach-Nahman R.; Mizraji G.; Shapira L.; Nussbaum G.; Wilensky A.                                                                                                                              | 2017 |
| Basis of bone metabolism around dental implants during osseointegration and peri-implant bone loss                                                                                                                                                                                                                                                                      | Insua A.; Monje A.; Wang H.-L.; Miron R.J.                                                                                                                                                     | 2017 |
| Non-surgical treatment of peri-implant mucositis and peri-implantitis at two-piece zirconium implants: A clinical follow-up observation after up to 3 years                                                                                                                                                                                                             | John G.; Becker J.; Schmucker A.; Schwarz F.                                                                                                                                                   | 2017 |
| Clinical Performance of Dental Implants with a Moderately Rough (TiUnite) Surface: A Meta-Analysis of Prospective Clinical Studies                                                                                                                                                                                                                                      | Karl M.; Albrektsson T.                                                                                                                                                                        | 2017 |
| Comparison of Clinical, Radiographic, and Immunologic Inflammatory Parameters Around Dental Implants with Cement-Retained and Screw-Retained Restorations: A 5-Year Prospective Cohort Study in Men                                                                                                                                                                     | Al Amri M.D.; Al-Rasheed A.S.; Al-Kheraif A.A.; Alfadda S.A.                                                                                                                                   | 2017 |
| Peri-implant and Paracrestal Inflammatory Biomarkers at Failing Versus Surviving Implant Sites in a Beagle Dog Study                                                                                                                                                                                                                                                    | Montero J.; Aragón F.; Blanco L.A.; Guadilla Y.; García-Cenador B.; López-Valverde A.                                                                                                          | 2017 |
| Effects of Two Diode Lasers With and Without Photosensitization on Contaminated Implant Surfaces: An Ex Vivo Study                                                                                                                                                                                                                                                      | Valente N.A.; Mang T.; Hatton M.; Mikulski L.; Andreana S.                                                                                                                                     | 2017 |
| Retrospective Evaluation of the Influence of the Collar Surface Topography on Peri-implant Bone Preservation                                                                                                                                                                                                                                                            | Mendonça J.A.; Senna P.M.; Francischone C.E.; Francischone Junior C.E.; de Souza Picorelli Assis N.M.; Sotto-Maior B.S.                                                                        | 2017 |
| Microbial colonization at the implant-abutment interface and its possible influence on periimplantitis: A systematic review and meta-analysis                                                                                                                                                                                                                           | Tallarico M.; Canullo L.; Caneva M.; Özcan M.                                                                                                                                                  | 2017 |
| Influence of Laser-Microtextured Surface Collar on Marginal Bone Loss and Peri-Implant Soft Tissue Response: A Systematic Review and Meta-Analysis                                                                                                                                                                                                                      | Chen Z.; Zhang Y.; Li J.; Wang H.-L.; Yu H.                                                                                                                                                    | 2017 |
| Inflammatory odontogenic cyst on an osseointegrated implant: A peri-implant cyst? New entity proposed                                                                                                                                                                                                                                                                   | Kochaji N.                                                                                                                                                                                     | 2017 |
| Discomfort/pain due to periodontal and peri-implant probing: Implant type and age                                                                                                                                                                                                                                                                                       | Stanner J.; Klum M.; Parvini P.; Zuhr O.; Nickles K.; Eickholz P.                                                                                                                              | 2017 |
| Premature exposure of dental implant cover screws. A retrospective evaluation of risk factors and influence on marginal peri-implant bone level changes                                                                                                                                                                                                                 | Hertel M.; Roh Y.-C.; Neumann K.; Strietzel F.P.                                                                                                                                               | 2017 |
| Bone and Soft Tissue Response in Bone-Level Implants Restored with Platform Switching: A 5-Year Clinical Prospective Study                                                                                                                                                                                                                                              | Lago L.; da Silva L.; Gude F.; Rilo B.                                                                                                                                                         | 2017 |
| Comparison of periodontal and peri-implant inflammatory parameters among patients with prediabetes, type 2 diabetes mellitus and non-diabetic controls                                                                                                                                                                                                                  | Abduljabbar T.; Al-Sahaly F.; Al-Kathami M.; Afzal S.; Vohra F.                                                                                                                                | 2017 |
| In vitro effects of dental cements on hard and soft tissues associated with dental implants                                                                                                                                                                                                                                                                             | Rodriguez L.C.; Saba J.N.; Chung K.-H.; Wadhwani C.; Rodrigues D.C.                                                                                                                            | 2017 |
| Single-staged vs. two-staged implant placement in vertically deficient alveolar ridges using bone ring technique - Part 2: implant osseointegration                                                                                                                                                                                                                     | Nakahara K.; Haga-Tsujimura M.; Sawada K.; Kobayashi E.; Schaller B.; Saulacic N.                                                                                                              | 2017 |
| Marginal healing using Polyetheretherketone as healing abutments: an experimental study in dogs                                                                                                                                                                                                                                                                         | Rea M.; Ricci S.; Ghensi P.; Lang N.P.; Botticelli D.; Soldini C.                                                                                                                              | 2017 |
| Short implants placed with or without grafting into atrophic sinuses: the 5-year results of a prospective randomized controlled study                                                                                                                                                                                                                                   | Nedir R.; Nurdin N.; Abi Najm S.; El Hage M.; Bischof M.                                                                                                                                       | 2017 |
| Bone augmentation at peri-implant dehiscence defects comparing a synthetic polyethylene glycol hydrogel matrix vs. standard guided bone regeneration techniques                                                                                                                                                                                                         | Thoma D.S.; Jung U.-W.; Park J.-Y.; Bienz S.P.; Hüsler J.; Jung R.E.                                                                                                                           | 2017 |
| One-year results of maxillary overdentures supported by 2 titanium-zirconium implants - implant survival rates and radiographic outcomes                                                                                                                                                                                                                                | Zembic A.; Tahmaseb A.; Jung R.E.; Wismeijer D.                                                                                                                                                | 2017 |
| Use of platelet-rich fibrin in regenerative dentistry: a systematic review                                                                                                                                                                                                                                                                                              | Miron R.J.; Zucchelli G.; Pikos M.A.; Salama M.; Lee S.; Guillemette V.; Fujioka-Kobayashi M.; Bishara M.; Zhang Y.; Wang H.-L.; Chandad F.; Nacopoulos C.; Simonpieri A.; Aalam               | 2017 |

|                                                                                                                                                                                                                     |                                                                                                                                                                                                                                                                                                                                                    |      |
|---------------------------------------------------------------------------------------------------------------------------------------------------------------------------------------------------------------------|----------------------------------------------------------------------------------------------------------------------------------------------------------------------------------------------------------------------------------------------------------------------------------------------------------------------------------------------------|------|
|                                                                                                                                                                                                                     | A.A.; Felice P.; Sammartino G.; Ghanaati S.; Hernandez M.A.; Choukroun J.                                                                                                                                                                                                                                                                          |      |
| Peri-Prosthetic Knee Infection Management: Spacers Loaded with Two or Three Antibiotic Agents                                                                                                                       | Ortola D.J.; Fenga D.; Marcellino S.; Rosi M.; Centofanti F.; Rosa M.A.                                                                                                                                                                                                                                                                            | 2017 |
| Anaesthesia and peri-interventional morbidity of rigid bronchoscopy: A retrospective analysis                                                                                                                       | Tan J.; Kirthinanda D.; Yu D.E.; Poopalalingam R.; Kothandan H.                                                                                                                                                                                                                                                                                    | 2017 |
| Practice variations in addressing acute tandem carotid occlusions in emergent large vessel occlusion strokes                                                                                                        | Coffman S.; Tro S.; Alhajer A.; Fraser J.                                                                                                                                                                                                                                                                                                          | 2017 |
| Local infiltration analgesia or femoral nerve block for postoperative pain management in patients undergoing total hip arthroplasty. A randomized, double-blind study                                               | Kuchálík J.; Magnuson A.; Lundin A.; Gupta A.                                                                                                                                                                                                                                                                                                      | 2017 |
| Transcatheter closure of the patent ductus arteriosus in premature infants is an effective alternative to video assisted thorascopic surgical closure                                                               | Breinholt J.; Wang E.; Srinivasan C.; Douglas W.                                                                                                                                                                                                                                                                                                   | 2017 |
| Myeloperoxidase Mediates Postischemic Arrhythmogenic Ventricular Remodeling                                                                                                                                         | Mollenhauer M.; Friedrichs K.; Lange M.; Gesenberg J.; Remane L.; Kerkenpaß C.; Krause J.; Schneider J.; Ravekes T.; Maass M.; Halbach M.; Peinkofer G.; Saric T.; Mehrkens D.; Adam M.; Deuschl F.G.; Lau D.; Geertz B.; Manchanda K.; Eschenhagen T.; Kubala L.; Rudolph T.K.; Wu Y.; Tang W.H.W.; Hazen S.L.; Baldus S.; Klinkle A.; Rudolph V. | 2017 |
| AUM voice prosthesis: A \$1 novel modified tracheo-esophageal voice prosthesis for total laryngectomy patients (TEP)                                                                                                | Rao V.U.S.; Chatterjee S.                                                                                                                                                                                                                                                                                                                          | 2017 |
| Quality assessment of systematic reviews of the significance of keratinized mucosa on implant health                                                                                                                | Moraschini V.; Luz D.; Velloso G.; Barboza E.D.P.                                                                                                                                                                                                                                                                                                  | 2017 |
| Augmentation of keratinized gingiva around dental implants                                                                                                                                                          | Kissa J.; El Kholti W.; Laalou Y.; El Farouki M.                                                                                                                                                                                                                                                                                                   | 2017 |
| Bacterial colonization of the implant-Abutment interface of conical connection with an internal octagon: An in vitro study using real-Time PCR                                                                      | Baj A.; Beltramini G.A.; Bolzoni A.; Cura F.; Palmieri A.; Scarano A.; Ottria L.; Gianni A.B.                                                                                                                                                                                                                                                      | 2017 |
| Osteoblast growth, after cleaning of biofilm-covered titanium discs with air-polishing and cold plasma                                                                                                              | Matthes R.; Duske K.; Kebede T.G.; Pink C.; Schlüter R.; von Woedtke T.; Weltmann K.-D.; Kocher T.; Jablonowski L.                                                                                                                                                                                                                                 | 2017 |
| Cement-associated peri-implant mucositis. A 1-year follow-up after excess cement removal on the peri-implant tissue of dental implants                                                                              | Korsch M.; Walther W.; Bartols A.                                                                                                                                                                                                                                                                                                                  | 2017 |
| Immediate implant and rehabilitation based on All-on-4 concept in patients with generalized aggressive periodontitis: A medium-term prospective study                                                               | Li S.; Di P.; Zhang Y.; Lin Y.                                                                                                                                                                                                                                                                                                                     | 2017 |
| Dental Implant Survival and Complication Rate over 2 Years for Individuals with Poorly Controlled Type 2 Diabetes Mellitus                                                                                          | Eskow C.C.; Oates T.W.                                                                                                                                                                                                                                                                                                                             | 2017 |
| Immediate loading of short implants in posterior maxillae: Case series                                                                                                                                              | Anitua E.                                                                                                                                                                                                                                                                                                                                          | 2017 |
| Chronic periodontitis and implant dentistry                                                                                                                                                                         | Smith M.M.; Knight E.T.; Al-Harathi L.; Leichter J.W.                                                                                                                                                                                                                                                                                              | 2017 |
| How to treat two adjacent missing teeth with dental implants. A systematic review on single implant-supported two-unit cantilever FDP's and results of a 5-year prospective comparative study in the aesthetic zone | Van Nimwegen W.G.; Raghoobar G.M.; Tymstra N.; Vissink A.; Meijer H.J.A.                                                                                                                                                                                                                                                                           | 2017 |
| Graft-Free Maxillary Sinus Floor Elevation: A Systematic Review and Meta-Analysis                                                                                                                                   | Duan D.-H.; Fu J.-H.; Qi W.; Du Y.; Pan J.; Wang H.-L.                                                                                                                                                                                                                                                                                             | 2017 |
| A Comparative Analysis on Two Types of Oral Implants, Bone-Level and Tissue-Level, with Different Cantilever Lengths of Fixed Prosthesis                                                                            | Mosavar A.; Nili M.; Hashemi S.R.; Kadhodaei M.                                                                                                                                                                                                                                                                                                    | 2017 |
| Long-term clinical and prosthetic outcomes of soft liner and clip attachments for bar/implant overdentures: a randomised controlled clinical trial                                                                  | ELsyad M.A.; Shaheen N.H.; Ashmawy T.M.                                                                                                                                                                                                                                                                                                            | 2017 |
| Bidirectional flux of fluids & microbiota at implant-Abutment connection of FMD storm implant system: An in vitro study using RT-PCR                                                                                | Baj A.; Romano M.; Segna E.; Palmieri A.; Cura F.; Scarano A.; Ottria L.; Gianni A.B.                                                                                                                                                                                                                                                              | 2017 |
| In silico identification of a therapeutic target for photo-activated disinfection with indocyanine green: Modeling and virtual screening analysis of Arg-gingipain from Porphyromonas gingivalis                    | Pourhajibagher M.; Bahador A.                                                                                                                                                                                                                                                                                                                      | 2017 |
| Wound haematoma following defibrillator implantation: Incidence and predictors in the Shockless Implant Evaluation (SIMPLE) trial                                                                                   | Masiero S.; Connolly S.J.; Birnie D.; Neuzner J.; Hohnloser S.H.; Vinolas X.; Kautzner J.; O'Hara G.; Vanerven L.; Gadler F.; Wang J.; Mabo P.; Glikson M.; Kutiyfa V.; Wright D.J.; Essebag V.; Healey J.S.                                                                                                                                       | 2017 |
| The use of bacteriophages to biocontrol oral biofilms                                                                                                                                                               | Szafrański S.P.; Winkel A.; Stiesch M.                                                                                                                                                                                                                                                                                                             | 2017 |
| Survival/Success of Dental Implants with Acid-Etched Surfaces: A Retrospective Evaluation After 8 to 10 Years                                                                                                       | Nicoli L.G.; Oliveira G.J.P.L.; Lopes B.M.V.; Marcantonio C.; Zandim-Barcelos D.L.; Marcantonio E.                                                                                                                                                                                                                                                 | 2017 |
| Survival Rates and Bone and Soft Tissue Level Changes Around One-Piece Dental Implants Placed with a Flapless or Flap Protocol: 8.5-Year Results                                                                    | Froum S.J.; Khoully I.                                                                                                                                                                                                                                                                                                                             | 2017 |
| Peri-implant Soft Tissue Stability After Single Implant Restorations Using Either Guided Bone Regeneration or a Connective Tissue Graft: A Randomized Clinical Trial                                                | D'Elia C.; Baldini N.; Cagidiaco E.F.; Nofri G.; Goracci C.; de Sanctis M.                                                                                                                                                                                                                                                                         | 2017 |
| Various Tip Applications and Temperature Changes of Er,Cr:YSGG-Laser Irradiated Implants In Vitro                                                                                                                   | Romanos G.E.; Montanaro N.J.; Sacks D.; Miller R.J.; Javed F.; Calvo-Guirado J.L.; Delgado-Ruiz R.A.                                                                                                                                                                                                                                               | 2017 |
| Radiopacity of Luting Cements as a Potential Factor in Peri-implantitis: An In Vitro Comparative Study                                                                                                              | Cal E.; Guneri P.; Unal S.; Türk A.G.; Ulusoy M.; Boyacioglu H.                                                                                                                                                                                                                                                                                    | 2017 |
| Oral Rehabilitation of a Patient With Ectodermal Dysplasia Treated With Fresh-Frozen Bone Allografts and Computer-Guided Implant Placement: A Clinical Case Report                                                  | Maiorana C.; Poli P.P.; Poggio C.; Barbieri P.; Beretta M.                                                                                                                                                                                                                                                                                         | 2017 |



|                                                                                                                                                                                                                         |                                                                                                                                                                                                                                                                                                                                                                                                                                                                                                                 |      |
|-------------------------------------------------------------------------------------------------------------------------------------------------------------------------------------------------------------------------|-----------------------------------------------------------------------------------------------------------------------------------------------------------------------------------------------------------------------------------------------------------------------------------------------------------------------------------------------------------------------------------------------------------------------------------------------------------------------------------------------------------------|------|
| Carbon fibre versus metal framework in full-arch immediate loading rehabilitations of the maxilla - a cohort clinical study                                                                                             | Pera F.; Pesce P.; Solimano F.; Tealdo T.; Pera P.; Menini M.                                                                                                                                                                                                                                                                                                                                                                                                                                                   | 2017 |
| Interprosthetic and Peri-Implant Fractures: Principles of Operative Fixation and Future Directions                                                                                                                      | Liporace F.A.; Yoon R.S.; Collinge C.A.                                                                                                                                                                                                                                                                                                                                                                                                                                                                         | 2017 |
| Erbium, Chromium:Yttrium-Scandium-Gallium-Garnet Laser Effectively Ablates Single-Species Biofilms on Titanium Disks Without Detectable Surface Damage                                                                  | Strever J.M.; Lee J.; Ealick W.; Peacock M.; Shelby D.; Susin C.; Mettenberg D.; El-Awady A.; Rueggeberg F.; Cutler C.W.                                                                                                                                                                                                                                                                                                                                                                                        | 2017 |
| Treatment Outcomes for Mandibular Mini-Implant-Retained Overdentures: A Systematic Review                                                                                                                               | Park J.-H.; Lee J.-Y.; Shin S.-W.                                                                                                                                                                                                                                                                                                                                                                                                                                                                               | 2017 |
| Expansion of the peri-implant attached gingiva with a three-dimensional collagen matrix in head and neck cancer patients-results from a prospective clinical and histological study                                     | Lorenz J.; Blume M.; Barbeck M.; Teiler A.; Kirkpatrick C.J.; Sader R.A.; Ghanaati S.                                                                                                                                                                                                                                                                                                                                                                                                                           | 2017 |
| Comparison of Marginal Bone Level Changes of Immediately Loaded Implants, Delayed Loaded Nonsubmerged Implants, and Delayed Loaded Submerged Implants: A Randomized Clinical Trial                                      | Giacomel M.C.; Camati P.; Souza J.; Deliberador T.                                                                                                                                                                                                                                                                                                                                                                                                                                                              | 2017 |
| Retrospective Cohort Study Examining Reduced Intensity and Duration of Anticoagulant and Antiplatelet Therapy Following Left Atrial Appendage Occlusion with the WATCHMAN Device                                        | Tung M.K.; Ramkumar S.; Cameron J.D.; Pang B.; Nerlekar N.; Kotschet E.; Alison J.                                                                                                                                                                                                                                                                                                                                                                                                                              | 2017 |
| Salvage of infected breast implants with continuous periprosthetic antibiotic irrigation: A retrospective audit                                                                                                         | Kellsall J.; Gutteridge E.; Whisker L.                                                                                                                                                                                                                                                                                                                                                                                                                                                                          | 2017 |
| Use of a lyophilized bovine pericardium graft to repair tunical defect in patients with Peyronie's disease: Experience in a clinical setting                                                                            | Otero J.R.; Gómez B.G.; Polo J.M.; Mateo C.P.; Barreras S.G.; Cruz E.G.; De La Riva De La Viña J.; Antolín A.R.                                                                                                                                                                                                                                                                                                                                                                                                 | 2017 |
| Introduction to the centers for disease control and prevention and healthcare infection control practices advisory committee guideline for prevention of surgical site infection: Prosthetic joint Arthroplasty section | Segreti J.; Parvizi J.; Berbari E.; Ricks P.; Berrios-Torres S.I.                                                                                                                                                                                                                                                                                                                                                                                                                                               | 2017 |
| Stent retriever thrombectomy with the mindframe capture LP in peripheral anterior cerebral circulation occlusions                                                                                                       | Dobrocky T.; Kurmann R.; Piechowiak E.; Zibold F.; Jung S.; Fischer U.; Arnold M.; Gralla J.; Mordasini P.                                                                                                                                                                                                                                                                                                                                                                                                      | 2017 |
| Interventions for replacing missing teeth: Implant placement at different levels in relation to crestal bone                                                                                                            | Khoully I.; Veitz-Keenan A.; Loomer P.M.; Esposito M.                                                                                                                                                                                                                                                                                                                                                                                                                                                           | 2017 |
| Long-Term Effect of Surface Roughness and Patients' Factors on Crestal Bone Loss at Dental Implants. A Systematic Review and Meta-Analysis                                                                              | Doornewaard R.; Christiaens V.; De Bruyn H.; Jacobsson M.; Cosyn J.; Vervaeke S.; Jacquet W.                                                                                                                                                                                                                                                                                                                                                                                                                    | 2017 |
| Dental implants: Assessment of pain, discomfort, and altered sensations                                                                                                                                                 | Vera Resendiz C.; LaPrade J.; Bair E.; Hicks M.; Albury T.; Salo P.; Khan A.; Cooper L.; Maixner W.                                                                                                                                                                                                                                                                                                                                                                                                             | 2017 |
| Altered expectations on dental implant therapy; views of patients referred for treatment of peri-implantitis                                                                                                            | Abrahamsson K.H.; Wennström J.L.; Berglundh T.; Abrahamsson I.                                                                                                                                                                                                                                                                                                                                                                                                                                                  | 2017 |
| Influence of maintenance care in periodontally susceptible and non-susceptible subjects following implant therapy                                                                                                       | Tan W.C.; Ong M.M.; Lang N.P.                                                                                                                                                                                                                                                                                                                                                                                                                                                                                   | 2017 |
| Immediate versus delayed loading of implant for replacement of missing mandibular first molar: A randomized prospective six years clinical study                                                                        | Chidagam P.R.L.V.; Gande V.C.; Yadlapalli S.; Venkata R.Y.; Kondaka S.; Chedalawada S.                                                                                                                                                                                                                                                                                                                                                                                                                          | 2017 |
| Implant-supported removable partial dentures in the mandible: A 3-16 year retrospective study                                                                                                                           | Jensen C.; Meijer H.J.A.; Raghoobar G.M.; Kerdijk W.; Cune M.S.                                                                                                                                                                                                                                                                                                                                                                                                                                                 | 2017 |
| The effect of one-time abutment placement on interproximal bone levels and peri-implant soft tissues: a prospective randomized clinical trial                                                                           | Molina A.; Sanz-Sánchez I.; Martín C.; Blanco J.; Sanz M.                                                                                                                                                                                                                                                                                                                                                                                                                                                       | 2017 |
| Esthetic Assessment of Implants Placed into Fresh Extraction Sockets for Single-Tooth Replacements Using a Flapless Approach                                                                                            | Kolerman R.; Mijiritsky E.; Barnea E.; Dabaja A.; Nissan J.; Tal H.                                                                                                                                                                                                                                                                                                                                                                                                                                             | 2017 |
| Comparative Clinical Study of Conventional Dental Implants and Mini Dental Implants for Mandibular Overdentures: A Randomized Clinical Trial                                                                            | Aunmeungtong W.; Kumchai T.; Strietzel F.P.; Reichart P.A.; Khongkhunthian P.                                                                                                                                                                                                                                                                                                                                                                                                                                   | 2017 |
| A Retrospective Survival Study of Trabecular Tantalum Implants Immediately Placed in Posterior Extraction Sockets Using a Flapless Technique                                                                            | El Chaar E.; Castaño A.                                                                                                                                                                                                                                                                                                                                                                                                                                                                                         | 2017 |
| The NobelGuide® All-on-4® Treatment Concept for Rehabilitation of Edentulous Jaws: A Retrospective Report on the 7-Years Clinical and 5-Years Radiographic Outcomes                                                     | Lopes A.; Maló P.; de Araújo Nobre M.; Sánchez-Fernández E.; Gravito I.                                                                                                                                                                                                                                                                                                                                                                                                                                         | 2017 |
| Effect of a Connective Tissue Graft in Combination With a Single Flap Approach in the Regenerative Treatment of Intraosseous Defects                                                                                    | Trombelli L.; Simonelli A.; Minenna L.; Rasperini G.; Farina R.                                                                                                                                                                                                                                                                                                                                                                                                                                                 | 2017 |
| Mesenchymal stem cells in the aseptic loosening of total joint replacements                                                                                                                                             | Pajarinen J.; Lin T.-H.; Nabeshima A.; Jämsen E.; Lu L.; Nathan K.; Yao Z.; Goodman S.B.                                                                                                                                                                                                                                                                                                                                                                                                                        | 2017 |
| Phage therapy: A new horizon in the antibacterial treatment of oral pathogens                                                                                                                                           | Shlezinger M.; Khalifa L.; Hourri-Haddad Y.; Copenhagen-Glazer S.; Resch G.; Que Y.-A.; Beyth S.; Dorfman E.; Hazan R.; Beyth N.                                                                                                                                                                                                                                                                                                                                                                                | 2017 |
| Biofilm-mediated antibiotic-resistant oral bacterial infections: Mechanism and combat strategies                                                                                                                        | Kanwar I.; Sah A.K.; Suresh P.K.                                                                                                                                                                                                                                                                                                                                                                                                                                                                                | 2017 |
| Incidence of early right heart failure after left ventricular assist device implantation in patients managed without inhaled nitric oxide                                                                               | Michaud C.; Marco G.; Schaap A.; Dickinson M.; Wilton P.                                                                                                                                                                                                                                                                                                                                                                                                                                                        | 2017 |
| Outcome of knee revisions for osteoarthritis and inflammatory arthritis with postero-stabilized arthroplasties: a mean ten-year follow-up with 90 knee revisions                                                        | Hernigou P.; Dubory A.; Potage D.; Roubineau F.; Flouzat-Lachaniette C.H.                                                                                                                                                                                                                                                                                                                                                                                                                                       | 2017 |
| Prevalence and risk factors for peri-implant diseases in Japanese adult dental patients                                                                                                                                 | Ogata Y.; Nakayama Y.; Tatsumi J.; Kubota T.; Sato S.; Nishida T.; Takeuchi Y.; Onitsuka T.; Sakagami R.; Nozaki T.; Murakami S.; Matsubara N.; Tanaka M.; Yoshino T.; Ota J.; Nakagawa T.; Ishihara Y.; Ito T.; Saito A.; Yamaki K.; Matsuzaki E.; Hidaka T.; Sasaki D.; Yaegashi T.; Yasuda T.; Shibutani T.; Noguchi K.; Araki H.; Ikumi N.; Aoyama Y.; Kogai H.; Nemoto K.; Deguchi S.; Takiguchi T.; Yamamoto M.; Inokuchi K.; Ito T.; Kado T.; Furuichi Y.; Kanazashi M.; Gomi K.; Takagi Y.; Kubokawa K. | 2017 |

|                                                                                                                                                                                                                     |                                                                                                                                    |      |
|---------------------------------------------------------------------------------------------------------------------------------------------------------------------------------------------------------------------|------------------------------------------------------------------------------------------------------------------------------------|------|
|                                                                                                                                                                                                                     | Yoshinari N.; Hasegawa Y.; Hirose T.; Sase T.; Arita H.; Kodama T.; Shin K.; Izumi Y.; Yoshie H.                                   |      |
| Implant maintenance treatment and peri-implant health                                                                                                                                                               | Howe M.-S.                                                                                                                         | 2017 |
| Prevalence of peri-implantitis in patients not participating in well-designed supportive periodontal treatments: a cross-sectional study                                                                            | Rokn A.; Aslroosta H.; Akbari S.; Najafi H.; Zayeri F.; Hashemi K.                                                                 | 2017 |
| Histologic Evaluation of Sinus Grafting Materials After Peri-implantitis-Induced Failure: A Case Series                                                                                                             | Scarano A.; Cholakakis A.K.; Piattelli A.                                                                                          | 2017 |
| Short Dental Implants Retaining Two-Implant Mandibular Overdentures in Very Old, Dependent Patients: Radiologic and Clinical Observation Up to 5 Years                                                              | Maniewicz S.; Buser R.; Duvernay E.; Vazquez L.; Loup A.; Perneger T.V.; Schimmel M.; Müller F.                                    | 2017 |
| Implant outcomes poorer in patients with history of periodontal disease                                                                                                                                             | Veitz-Keenan A.; Keenan J.R.                                                                                                       | 2017 |
| Comparison of clinical and radiographic status around immediately loaded versus conventional loaded implants placed in patients with type 2 diabetes: 12- and 24-month follow-up results                            | Al Amri M.D.; Alfarraj Aldosari A.M.; Al-Johany S.S.; Al Baker A.M.; Al Rifaiy M.Q.; Al-Kheraif A.A.                               | 2017 |
| Hybrid Implants in Healthy and Periodontally Compromised Patients: A Preliminary Clinical and Radiographic Study                                                                                                    | Spinato S.; Bernardello F.; Sassatelli P.; Zaffe D.                                                                                | 2017 |
| Titanium surface dependent regulation of bone remodeling in osseointegration implicates semaphorins                                                                                                                 | Lotz E.M.; Berger M.B.; Hyzy S.L.; Schwartz Z.; Boyan B.D.                                                                         | 2017 |
| Outcome assessment of All-on-four and All-on-six implant restoration in edentulous patients in Indian population                                                                                                    | Kumar K.A.                                                                                                                         | 2017 |
| A randomized controlled clinical trial comparing small buccal dehiscence defects around dental implants treated with guided bone regeneration or left for spontaneous healing                                       | Jung R.E.; Herzog M.; Wolleb K.; Ramel C.F.; Thoma D.S.; Hammerle C.H.                                                             | 2017 |
| Feasibility of implant treatment provided by public health insurance in our hospital                                                                                                                                | Yanai C.; Hiraga Y.; Koresawa K.; Kuraji M.; Ishii M.; Oshima M.; Yamada M.; Ogura S.                                              | 2017 |
| Retrospective evaluation of bone graft and dental implants survival after combined one step double-team endoscopic sinus surgery and sinus floor elevation procedure                                                | Pesis M.; Koren I.; Safadi A.; Reiser V.; Benjamin S.; Shuster A.; Kleinman S.                                                     | 2017 |
| Immediate postextraction dental implantation with fixation of implant to buccal and palatal bone wall of tooth socket using miniplates (case report of 10 years of success)                                         | Farajov E.; Arkhmmammadov A.; Ibrahimov R.                                                                                         | 2017 |
| Compatible CAD-CAM titanium abutments for posterior single-implant tooth replacement: A retrospective case series                                                                                                   | Hsu K.-W.; Shen Y.-F.; Wei P.-C.                                                                                                   | 2017 |
| Definition, etiology, prevention and treatment of periimplantitis                                                                                                                                                   | Bošnjak A.                                                                                                                         | 2017 |
| Outcomes of implant therapy in patients with a history of aggressive periodontitis. A systematic review and meta-analysis                                                                                           | Theodoridis C.; Grigoriadis A.; Menexes G.; Vouros I.                                                                              | 2017 |
| Minimally invasive technique for preservation of stabile periimplant soft tissues after immediate implant placement - A clinical study                                                                              | Smojver I.; Illeš D.; Sušić M.; Gabric D.                                                                                          | 2017 |
| Developing a preclinical model of hematogenous implant infection                                                                                                                                                    | Mills R.; Cheng T.; Mikulec K.; Peacock L.; Little D.; Schindeler A.                                                               | 2017 |
| Vertical Ridge Augmentation in the Atrophic Mandible: A Systematic Review and Meta-Analysis                                                                                                                         | Elnayef B.; Monje A.; Gargallo-Albiol J.; Galindo-Moreno P.; Wang H.-L.; Hernández-Alfaro F.                                       | 2017 |
| Results of morphological studies on the effectiveness of dental implantation using low-intensity pulsed ultrasound                                                                                                  | Khomich I.; Rubnikovich S.; Khomich S.; Khomich A.                                                                                 | 2017 |
| Burden of noninfectious inflammatory eye diseases: A systematic literature review                                                                                                                                   | Rice J.; White A.; Scarpati L.; Philbin M.; Wan G.; Nelson W.                                                                      | 2017 |
| Liposomal bupivacaine in total hip arthroplasty: Do the results justify the cost?                                                                                                                                   | Beachler J.A.; Kopolovich D.M.; Tubb C.C.; Sayeed S.A.                                                                             | 2017 |
| A rare case of persistently recurrent hyperkalemia in end stage renal disease (ESRD) following bio prosthetic aortic valve replacement - Could the new potassium-binding polymer, patiromer, have been useful here? | Onuigbo M.; Agbasi N.                                                                                                              | 2017 |
| Barriers to Early Discharge after Elective Percutaneous Coronary Intervention (BED PCI): A Single-Center Study                                                                                                      | Graziano F.D.; Banga S.; Busman D.K.; Muthusamy P.; Wohns D.H.                                                                     | 2017 |
| Reliability of periodontal diagnostic tools for monitoring peri-implant health and disease                                                                                                                          | Coli P.; Christiaens V.; Sennerby L.; Bruyn H.                                                                                     | 2017 |
| Implant surface roughness and patient factors on long-term peri-implant bone loss                                                                                                                                   | De Bruyn H.; Christiaens V.; Doornewaard R.; Jacobsson M.; Cosyn J.; Jacquet W.; Vervaeke S.                                       | 2017 |
| Comparison of clinical and radiographic status around dental implants placed in patients with and without prediabetes: 1-year follow-up outcomes                                                                    | Al Amri M.D.; Abduljabbar T.S.; Al-Kheraif A.A.; Romanos G.E.; Javed F.                                                            | 2017 |
| Risk indicators for Peri-implantitis. A cross-sectional study with 916 implants                                                                                                                                     | Dalago H.R.; Schuldt Filho G.; Rodrigues M.A.; Renvert S.; Bianchini M.A.                                                          | 2017 |
| Occlusal trauma and mucositis or peri-implantitis?                                                                                                                                                                  | Passanezi E.; Sant'Ana A.C.; Damante C.A.                                                                                          | 2017 |
| Osseointegration of titanium, titanium alloy and zirconia dental implants: current knowledge and open questions                                                                                                     | Bosshardt D.D.; Chappuis V.; Buser D.                                                                                              | 2017 |
| Stock Versus CAD/CAM Customized Zirconia Implant Abutments - Clinical and Patient-Based Outcomes in a Randomized Controlled Clinical Trial                                                                          | Schepke U.; Meijer H.J.; Kerdijk W.; Raghoobar G.M.; Cune M.                                                                       | 2017 |
| Enterococcus faecalis and Dental Implants                                                                                                                                                                           | Flanagan D.                                                                                                                        | 2017 |
| Bone Remodeling Around Implants with External Hexagon and Morse-Taper Connections: A Randomized, Controlled, Split-Mouth, Clinical Trial                                                                            | Pessoa R.S.; Sousa R.M.; Pereira L.M.; Neves F.D.; Bezerra F.J.; Jacques S.V.; Sloten J.V.; Quirynen M.; Teughels W.; Spin-Neto R. | 2017 |

|                                                                                                                                                                                                                                                       |                                                                                                                                         |      |
|-------------------------------------------------------------------------------------------------------------------------------------------------------------------------------------------------------------------------------------------------------|-----------------------------------------------------------------------------------------------------------------------------------------|------|
| Use of cone beam computed tomography in implant dentistry: current concepts, indications and limitations for clinical practice and research                                                                                                           | Bornstein M.M.; Horner K.; Jacobs R.                                                                                                    | 2017 |
| Titanium ions form particles that activate and execute interleukin-1 $\beta$ release from lipopolysaccharide-primed macrophages                                                                                                                       | Pettersson M.; Kelk P.; Belibasakis G.N.; Bylund D.; Molin Thorén M.; Johansson A.                                                      | 2017 |
| Coverage of mucosal recessions at dental implants                                                                                                                                                                                                     | Sculean A.; Chappuis V.; Cosgarea R.                                                                                                    | 2017 |
| Modern implant dentistry based on osseointegration: 50 years of progress, current trends and open questions                                                                                                                                           | Buser D.; Sennerby L.; De Bruyn H.                                                                                                      | 2017 |
| In vitro cleaning potential of three implant debridement methods. Simulation of the non-surgical approach                                                                                                                                             | Ronay V.; Merlini A.; Attin T.; Schmidlin P.R.; Sahrman P.                                                                              | 2017 |
| Guided bone regeneration and abutment connection augment the buccal soft tissue contour: 3-year results of a prospective comparative clinical study                                                                                                   | Benic G.I.; Ge Y.; Gallucci G.O.; Jung R.E.; Schneider D.; Hämmerle C.H.                                                                | 2017 |
| Effects of Porphyromonas gingivalis on Titanium Surface by Different Clinical Treatment                                                                                                                                                               | Batsukh N.; Feng S.W.; Lee W.F.; Leu S.-J.; Tsai P.-Y.; Ho K.-N.; Lin C.T.; Su C.-H.; Chang W.-J.                                       | 2017 |
| Subgingival airpolishing: A simple and cost effective medical insurance                                                                                                                                                                               | Karmakar S.; Kamath D.G.                                                                                                                | 2017 |
| Long-term Evaluation of Peri-implant Bone Level after Reconstruction of Severely Atrophic Edentulous Maxilla via Vertical and Horizontal Guided Bone Regeneration in Combination with Sinus Augmentation: A Case Series with 1 to 15 Years of Loading | Urban I.A.; Monje A.; Lozada J.L.; Wang H.-L.                                                                                           | 2017 |
| Patient-reported outcomes of implant placement performed concomitantly with transcrestal sinus floor elevation or entirely in native bone                                                                                                             | Franceschetti G.; Rizzi A.; Minenna L.; Pramstraller M.; Trombelli L.; Farina R.                                                        | 2017 |
| Outcomes of 6.5-mm Hydrophilic Implants and Long Implants Placed with Lateral Sinus Floor Elevation in the Atrophic Posterior Maxilla: A Prospective, Randomized Controlled Clinical Comparison                                                       | Yu H.; Wang X.; Qiu L.                                                                                                                  | 2017 |
| Comparison of clinical and radiographic status of platform-switched implants placed in patients with and without type 2 diabetes mellitus: a 24-month follow-up longitudinal study                                                                    | Al Amri M.D.; Abduljabbar T.S.                                                                                                          | 2017 |
| Stability and Crestal Bone Behavior Following Simultaneous Placement of Multiple Dental Implants (Two or More) with the Bone Splitting Technique: A Clinical and Radiographic Evaluation                                                              | Gehrke S.A.; Maté Sánchez de Val J.E.; Ramírez Fernández M.P.; Shibli J.A.; Rossetti P.H.; Calvo Guirado J.L.                           | 2017 |
| Implant-retained prostheses: ball vs. conus attachments - A randomized controlled clinical trial                                                                                                                                                      | Cepa S.; Koller B.; Spies B.C.; Stampf S.; Kohal R.-J.                                                                                  | 2017 |
| Lateral Ridge Augmentation Using Autogenous Block Grafts and Guided Bone Regeneration: A 10-Year Prospective Case Series Study                                                                                                                        | Chappuis V.; Cavusoglu Y.; Buser D.; von Arx T.                                                                                         | 2017 |
| Ridge Dimensions of the Edentulous Mandible in Posterior Sextants: An Observational Study on Cone Beam Computed Tomography Radiographs                                                                                                                | Bressan E.; Ferrarese N.; Pramstraller M.; Lops D.; Farina R.; Tomasi C.                                                                | 2017 |
| Periprocedural stroke and myocardial infarction as risks for long-term mortality in CREST                                                                                                                                                             | Jones M.R.; Roubin G.S.; Clark W.M.; Mackey A.; Blackshear J.; Hill M.D.; Cohen D.J.; Hughes S.E.; Voeks J.H.; Meschia J.F.; Brott T.G. | 2017 |
| Interim report of the weave trial: First 102 consecutive on label patients                                                                                                                                                                            | Alexander M.J.; Chaloupka J.C.; Zauner A.; Baxter B.; Callison R.; Yu W.                                                                | 2017 |
| Biodegradable Magnesium Screws Accelerate Fibrous Tissue Mineralization at the Tendon-Bone Insertion in Anterior Cruciate Ligament Reconstruction Model of Rabbit                                                                                     | Wang J.; Xu J.; Fu W.; Cheng W.; Chan K.; Yung P.S.-H.; Qin L.                                                                          | 2017 |
| Long-term prospective cohort study on dental implants: clinical and microbiological parameters                                                                                                                                                        | Tenenbaum H.; Bogen O.; Séverac F.; Elkaim R.; Davideau J.-L.; Huck O.                                                                  | 2017 |
| Evaluation of Metalloproteinase-8 Levels in Crevicular Fluid of Patients with Healthy Implants or Periodontitis                                                                                                                                       | Aleksandrowicz P.; Zelechowska P.; Agier J.; Starska K.; Kędzierski K.; Wysokińska-Miszczyk J.; Brzezińska-Błaszczak E.                 | 2017 |
| Peri-implant disease complications                                                                                                                                                                                                                    | Sachdeva S.; Saluja H.; Mani A.; Tandon P.                                                                                              | 2017 |
| Attributable fractions, modifiable risk factors and risk stratification using a risk score for peri-implant pathology                                                                                                                                 | de Araújo Nobre M.; Mano Azul A.; Rocha E.; Maló P.; Salvado F.                                                                         | 2017 |
| A randomized clinical trial about presence of pathogenic micro-flora and risk of peri-implantitis: Comparison of two different types of implant-abutment connections                                                                                  | Mencio F.; De Angelis F.; Papi P.; Rosella D.; Pompa G.; Di Carlo S.                                                                    | 2017 |
| In Vitro Laser Treatment Platform Construction with Dental Implant Thread Surface on Bacterial Adhesion for Peri-Implantitis                                                                                                                          | Kuo H.-N.; Mei H.-I.; Liu T.-K.; Liu T.-Y.; Lo L.-J.; Lin C.-L.                                                                         | 2017 |
| Treatment of peri-implantitis: clinical outcome of chloramine as an adjunctive to non-surgical therapy, a randomized clinical trial                                                                                                                   | Roos-Jansäker A.-M.; Almhöjd U.S.; Jansson H.                                                                                           | 2017 |
| Clinicopathologic evaluation of malignancy adjacent to dental implants                                                                                                                                                                                | Kaplan I.; Zeevi I.; Tal H.; Rosenfeld E.; Chaushu G.                                                                                   | 2017 |
| Fixed full arches supported by tapered implants with knife-edge thread design and nanostructured, calcium-incorporated surface: A short-term prospective clinical study                                                                               | Bechara S.; Lukosiunas A.; Dolcini G.A.; Kubilius R.                                                                                    | 2017 |
| The use of short dental implants in rigid fixed bridge for multiple missing teeth: A 2-year follow-up visit                                                                                                                                           | Zhang N.; Xiong Z.-J.; Wang X.-X.; Li H.-M.                                                                                             | 2017 |
| Intraoral radiography lacks accuracy for the assessment of peri-implant bone level - a controlled clinical study                                                                                                                                      | Christiaens V.; Jacobs R.; Dierens M.; Vervaeke S.; De Bruyn H.; Koole S.; Cosyn J.                                                     | 2017 |
| An immediate peri-implantitis induction model to study regenerative peri-implantitis treatments                                                                                                                                                       | Park S.-Y.; Kim K.-H.; Rhee S.-H.; Lee J.-C.; Shin S.-Y.; Lee Y.-M.; Seol Y.-J.                                                         | 2017 |
| Bleeding on probing around dental implants: a retrospective study of associated factors                                                                                                                                                               | Farina R.; Filippi M.; Brazzioli J.; Tomasi C.; Trombelli L.                                                                            | 2017 |
| Satisfaction and Clinical Outcomes Among Patients with Immediately Loaded Mandibular Overdentures Supported by One or Two Dental Implants: Results of a 5-Year Prospective Randomized Clinical Trial                                                  | Kronstrom M.; Davis B.; Loney R.; Gerrow J.; Hollender L.                                                                               | 2017 |

|                                                                                                                                                                                                                 |                                                                                                                                         |      |
|-----------------------------------------------------------------------------------------------------------------------------------------------------------------------------------------------------------------|-----------------------------------------------------------------------------------------------------------------------------------------|------|
| Long-Term Results of Peri-implant Conditions in Periodontally Compromised Patients Following Lateral Bone Augmentation                                                                                          | Keeve P.L.; Khoury F.                                                                                                                   | 2017 |
| Comparison of enzyme beta glucuronidase and alkaline phosphatase levels in peri implant sulcular fluid around healthy and diseased implants - A clinical pilot study                                            | Natarajan P.M.; Chandran C.R.; Prabhu P.                                                                                                | 2017 |
| Detection of various width and depth of peri-implant crestal bone defects with different imaging modalities                                                                                                     | Morgan N.; Aboelmaaty W.; Gadalla L.; Fadel E.A.                                                                                        | 2017 |
| Exploring the impact of oral health on quality of life of eating disorders patients                                                                                                                             | Vecchiattini R.; Manzato E.; Mobilio N.; Scardovelli I.; Pisani F.A.; Trombelli L.                                                      | 2017 |
| Impact of different implant surfaces topographies on peri-implant tissues: An update of current available data on dental implants retrieved from human jaws                                                     | Shibli J.A.; Pires J.T.; Piattelli A.; Iezzi G.; Mangano C.; Mangano F.; de Souza S.L.S.; Gehrke S.A.; Wang H.-L.; Dohan Ehrenfest D.M. | 2017 |
| Local complications of dental implant treatment                                                                                                                                                                 | Matej A.; Željko R.; Boras V.; Gabrić D.; Terlevic D.; Pelivan I.; Ana A.-R.                                                            | 2017 |
| Complex prophylaxis and prognosis of inflammatory complications after dental implantation                                                                                                                       | Mustafaev M.Sh.; Kharaeva Z.F.; Vissarionov V.A.; Mustafaeva F.M.; Zhigunov A.K.; Atmurzaev M.M.                                        | 2017 |
| Evaluation of Ultrashort and Longer Implants with Microrough Surfaces: Results of a 24- to 36-Month Prospective Study                                                                                           | Malchiodi L.; Caricasulo R.; Cucchi A.; Vinci R.; Agliardi E.; Gherlone E.                                                              | 2017 |
| Immediate, immediate-delayed (6 weeks) and delayed (4 months) post-extractive single implants: 1-year post-loading data from a randomised controlled trial                                                      | Esposito M.; Zucchelli G.; Cannizzaro G.; Checchi L.; Barausse C.; Trullenque-Eriksson A.; Felice P.                                    | 2017 |
| Soft tissue augmentation around osseointegrated and uncovered dental implants: a systematic review                                                                                                              | Basseti R.G.; Stähli A.; Basseti M.A.; Sculean A.                                                                                       | 2017 |
| Clinical study of flapless immediate implant placement and immediate restoration of single tooth in the oral aesthetic region                                                                                   | Zhang B.; Zhou Y.; Cai Q.; Li B.; Yin C.; Zhao Y.; Meng W.                                                                              | 2017 |
| Subcrestal placement of dental implants with an internal conical connection of 0.5 mm versus 1.5 mm: Outcome of a multicentre randomised controlled trial 1 year after loading                                  | Gualini F.; Salina S.; Rigotti F.; Mazzarini C.; Longhin D.; Grigoletto M.; Trullenque-Eriksson A.; Sbricoli L.; Esposito M.            | 2017 |
| Corrosion behavior of dental implants immersed into human saliva: Preliminary results of an in vitro study                                                                                                      | Barbieri M.; Mencia F.; Papi P.; Rosella D.; Di Carlo S.; Valente T.; Pompa G.                                                          | 2017 |
| Sinus Disventilation and Atrophy of the Upper Maxilla: A Combined Surgical Approach Is Possible?                                                                                                                | Cipriani O.; Vellone V.; Arangio P.; Della Rocca F.                                                                                     | 2017 |
| Immediate Loading of Single Implants: A 2-Year Prospective Multicenter Study                                                                                                                                    | Mangano C.; Raes F.; Lenzi C.; Eccellente T.; Ortolani M.; Luongo G.; Mangano F.                                                        | 2017 |
| Development of Implant Stability Quotient values of implants placed with simultaneous sinus floor elevation - results of a prospective study with 109 implants                                                  | Kuchler U.; Chappuis V.; Bornstein M.M.; Siewczyk M.; Gruber R.; Maestre L.; Buser D.                                                   | 2017 |
| The use of hyaluronic acid as an adjuvant in the management of mucositis                                                                                                                                        | Lopez M.A.; Manzulli N.; D'Angelo A.; Candotto V.; Casale M.; Lauritano D.                                                              | 2017 |
| Tapered, Double-Lead Threads Single Implants Placed in Fresh Extraction Sockets and Healed Sites of the Posterior Jaws: A Multicenter Randomized Controlled Trial with 1 to 3 Years of Follow-Up                | Cucchi A.; Vignudelli E.; Franco S.; Levrini L.; Castellani D.; Pagliani L.; Rea M.; Modena C.; Sandri G.; Longhi C.                    | 2017 |
| Four-year post-loading results of full-arch rehabilitation with immediate placement and immediate loading implants: A retrospective controlled study                                                            | Simonpieri A.; Gasparro R.; Pantaleo G.; Mignogna J.; Riccitiello F.; Sammartino G.                                                     | 2017 |
| An open, prospective, non-randomized, controlled, multicentre study to evaluate the clinical outcome of implant treatment in women over 60 years of age with osteoporosis/osteopenia: 1-year results            | Temmerman A.; Rasmusson L.; Kübler A.; Thor A.; Quirynen M.                                                                             | 2017 |
| Safety and efficacy of a biomimetic monolayer of permanently bound multiphosphonic acid molecules on dental implants: 3 years post-loading results from a pilot quadruple-blinded randomised controlled trial   | Esposito M.; Dojcinovic I.; Buchini S.; Péchy P.; Aronsson B.-O.                                                                        | 2017 |
| Synthesis, coating and in vitro study of antimicrobial copolymers for dental implants                                                                                                                           | Stelljes S.; Waßmann M.; Winkel A.; Stiesch M.; Menzel H.                                                                               | 2017 |
| Short term sodium alendronate administration improves the peri-implant bone quality in osteoporotic animals                                                                                                     | Oliveira D.; Hassumi J.S.; Gomes-Ferreira P.H.; Polo T.O.; Ferreira G.R.; Faverani L.P.; Okamoto R.                                     | 2017 |
| A clinical retrospective study of distal extension removable partial denture with implant surveyed bridge or stud type attachment                                                                               | Bae E.-B.; Kim S.-J.; Choi J.-W.; Jeon Y.-C.; Jeong C.-M.; Yun M.-J.; Lee S.-H.; Huh J.-B.                                              | 2017 |
| Do repeated changes of abutments have any influence on the stability of peri-implant tissues? One-year post-loading results from a multicentre randomised controlled trial                                      | Esposito M.; Bressan E.; Grusovin M.G.; D'Avenia F.; Neumann K.; Sbricoli L.; Luongo G.                                                 | 2017 |
| Prognostic value of a simplified method for periodontal risk assessment during supportive periodontal therapy                                                                                                   | Trombelli L.; Minenna L.; Toselli L.; Zaetta A.; Checchi L.; Checchi V.; Nieri M.; Farina R.                                            | 2017 |
| Residual root preparation for socket-shield procedures: a facial window approach                                                                                                                                | Roe P.; Kan J.Y.K.; Rungcharassaeng K.                                                                                                  | 2017 |
| Dental Implant Surrounding Marginal Bone Level Evaluation: Platform Switching versus Platform Matching - One-Year Retrospective Study                                                                           | Salamanca E.; Lin J.C.-Y.; Tsai C.-Y.; Hsu Y.-S.; Huang H.-M.; Teng N.-C.; Wang P.D.; Feng S.-W.; Chen M.-S.; Chang W.-J.               | 2017 |
| Implant success does not differ significantly according to implant type                                                                                                                                         | Coe J.M.                                                                                                                                | 2017 |
| Associated lesions of peri-implant mucosa in immediate versus delayed loading of dental implants                                                                                                                | Iliescu A.A.; Zurac S.A.; Nicolae V.; Iliescu M.G.; Perlea P.                                                                           | 2017 |
| Early Bone Formation around Immediately Loaded Transitional Implants Inserted in the Human Posterior Maxilla: The Effects of Fixture Design and Surface                                                         | Mangano C.; Shibli J.A.; Pires J.T.; Luongo G.; Piattelli A.; Iezzi G.                                                                  | 2017 |
| Immediate loading of two (fixed-on-2) vs four (fixed-on-4) implants placed with a flapless technique supporting mandibular cross-arch fixed prostheses: 3-year results from a pilot randomised controlled trial | Cannizzaro G.; Felice P.; Gherlone E.; Barausse C.; Ferri V.; Leone M.; Trullenque-Eriksson A.; Esposito M.                             | 2017 |
| Prospective clinical study of prosthetic treatment outcome of implant-retained-removable-partial-denture during 5 year-follow-ups                                                                               | Bahrami M.; Alsharbaty M.H.M.                                                                                                           | 2017 |

|                                                                                                                                                                                                                               |                                                                                                                                                                                                                                                                                                  |      |
|-------------------------------------------------------------------------------------------------------------------------------------------------------------------------------------------------------------------------------|--------------------------------------------------------------------------------------------------------------------------------------------------------------------------------------------------------------------------------------------------------------------------------------------------|------|
| Reconstruction of horizontoververtical alveolar defects. Presentation of a novel split-thickness flap design for guided bone regeneration: A case report with 5-year follow-up                                                | Windisch P.; Martin A.; Shahbazi A.; Molnar B.                                                                                                                                                                                                                                                   | 2017 |
| Dependence of spatial resolution of cone beam computed tomography on pixel size of flat panel detector                                                                                                                        | Honda K.; Suzuki T.; Hayashi Y.; Hirai S.; Arai Y.                                                                                                                                                                                                                                               | 2017 |
| Post-surgical clinical monitoring of soft tissue wound healing in periodontal and implant surgery                                                                                                                             | Pippi R.                                                                                                                                                                                                                                                                                         | 2017 |
| Technique for placement of peri-implant antibiotics using antibiotic putty                                                                                                                                                    | Firoozabadi R.; Miranda S.; Tornetta P.                                                                                                                                                                                                                                                          | 2017 |
| A comparison of two implants with conical vs internal hex connections: 1-year post-loading results from a multicentre, randomised controlled trial                                                                            | Cannata M.; Grandi T.; Samarani R.; Svezia L.; Grandi G.                                                                                                                                                                                                                                         | 2017 |
| The Mechanical Properties and Biometrical Effect of 3D Preformed Titanium Membrane for Guided Bone Regeneration on Alveolar Bone Defect                                                                                       | Lee S.-H.; Moon J.-H.; Jeong C.-M.; Bae E.-B.; Park C.-E.; Jeon G.-R.; Lee J.-J.; Jeon Y.-C.; Huh J.-B.                                                                                                                                                                                          | 2017 |
| Influence of Age on Factors associated with Peri-implant Bone Loss after Prosthetic Rehabilitation over Osseointegrated Implants                                                                                              | Pedro R.E.; De Carli J.P.; Linden M.S.; Lima I.F.; Paranhos L.R.; Costa M.D.; Bós ÁJ.                                                                                                                                                                                                            | 2017 |
| A clinically relevant in vivo model for the assessment of scaffold efficacy in abdominal wall reconstruction                                                                                                                  | Chan J.C.Y.; Burugapalli K.; Huang Y.-S.; Kelly J.L.; Pandit A.                                                                                                                                                                                                                                  | 2017 |
| Radiographic and Clinical Results of Freehand S2 Alar-Iliac Screw Placement for Spinopelvic Fixation                                                                                                                          | Park Y.-S.; Hyun S.-J.; Park J.-H.; Kim K.-J.; Jahng T.-A.; Kim H.-J.                                                                                                                                                                                                                            | 2017 |
| Use of non-warfarin oral anticoagulants instead of warfarin during left atrial appendage closure with the Watchman device                                                                                                     | Enomoto Y.; Gadiyaram V.K.; Gianni C.; Horton R.P.; Trivedi C.; Mohanty S.; Di Biase L.; Al-Ahmad A.; Burkhardt J.D.; Narula A.; Janczyk G.; Price M.J.; Afzal M.R.; Atoui M.; Earnest M.; Swarup V.; Doshi S.K.; van der Zee S.; Fisher R.; Lakkireddy D.R.; Gibson D.N.; Natale A.; Reddy V.Y. | 2017 |
| Novel Oral Anticoagulants in the Peri-Endoscopic Period                                                                                                                                                                       | Genualdi M.; Lebovics E.; Frishman W.H.                                                                                                                                                                                                                                                          | 2017 |
| Percutaneous closure of left atrial appendage with a watchman device: A single center study                                                                                                                                   | Bonnet G.; Salaun E.; Deffarges S.; Mouret J.; Cuisset T.; Bonnet J.                                                                                                                                                                                                                             | 2017 |
| ONE swallow does not a summer make but many swallows do: Accumulating clinical evidence for nearly-eliminated peri-procedural and 30-day complications with meshcovered stents transforms the carotid revascularisation field | Musialek P.; Hopkins L.N.; Siddiqui A.H.                                                                                                                                                                                                                                                         | 2017 |
| Longterm follow up in patients with mid-urethral slings with BMI greater than 40                                                                                                                                              | Elshatanoufy S.; Griffin M.; Wang Y.; Jamil M.; Matthews A.; Yousef M.; Richardson D.; Atiemo H.O.; Luck A.                                                                                                                                                                                      | 2017 |
| Comparison of open and robotic nephron sparing surgery: a single centre experience                                                                                                                                            | Jelley C.R.; Kurukulaarachchi K.A.S.H.; Forster L.; Bardgett H.; Singh R.; Addla S.K.                                                                                                                                                                                                            | 2017 |
| The impact of prophylactic pancreatic stenting on post-ERCP pancreatitis: A nationwide, register-based study                                                                                                                  | Olsson G.; Lübke J.; Arnelo U.; Jonas E.; Törnqvist B.; Lundell L.; Enochsson L.                                                                                                                                                                                                                 | 2017 |
| Left main coronary artery ostial stenosis and pseudoaneurysm diagnosed five years post bentall's procedure and aortic valve replacement, due to new onset cardiac ischaemia in the setting of bleeding                        | Whitehead N.; Mylabathula S.; Thambar S.                                                                                                                                                                                                                                                         | 2017 |
| Post-operative medical and surgical complications after primary total joint arthroplasty in solid organ transplant recipients: a case series                                                                                  | Palmisano A.C.; Kuhn A.W.; Urquhart A.G.; Pour A.E.                                                                                                                                                                                                                                              | 2017 |
| Dental implantation and soft tissue augmentation after ridge preservation in a molar site: a case report                                                                                                                      | Zhao L.P.; Zhan Y.L.; Hu W.J.; Wang H.J.; Wei Y.P.; Zhen M.; Xu T.; Liu Y.S.                                                                                                                                                                                                                     | 2016 |
| Should implants be considered for patients with periodontal disease?                                                                                                                                                          | King E.; Patel R.; Patel A.; Addy L.                                                                                                                                                                                                                                                             | 2016 |
| Clinical features of peri-implant medication-related osteonecrosis of the jaw: Is there an association to peri-implantitis?                                                                                                   | Troeltzsch M.; Cagna D.; Stähler P.; Probst F.; Kaeppler G.; Troeltzsch M.; Ehrenfeld M.; Otto S.                                                                                                                                                                                                | 2016 |
| Peri-Implant Disease--A Significant Complication of Dental Implant Supported Restorative Treatment                                                                                                                            | Hamada Y.; Shin D.; John V.                                                                                                                                                                                                                                                                      | 2016 |
| Prognostic indicators for surgical peri-implantitis treatment                                                                                                                                                                 | de Waal Y.C.; Raghoobar G.M.; Meijer H.J.; Winkel E.G.; van Winkelhoff A.J.                                                                                                                                                                                                                      | 2016 |
| Evaluation of bone loss in antibacterial coated dental implants: An experimental study in dogs                                                                                                                                | Godoy-Gallardo M.; Manzanares-Céspedes M.C.; Sevilla P.; Nart J.; Manzanares N.; Manero J.M.; Gil F.J.; Boyd S.K.; Rodríguez D.                                                                                                                                                                  | 2016 |
| A Novel Treatment Decision Tree and Literature Review of Retrograde Peri-Implantitis                                                                                                                                          | Sarmast N.D.; Wang H.H.; Soldatos N.K.; Angelov N.; Dorn S.; Yukna R.; Iacono V.J.                                                                                                                                                                                                               | 2016 |
| Effect of the Keratinized Mucosa Width on the Health Status of Periimplant and Contralateral Periodontal Tissues: A Cross-sectional Study                                                                                     | Ueno D.; Nagano T.; Watanabe T.; Shirakawa S.; Yashima A.; Gomi K.                                                                                                                                                                                                                               | 2016 |
| Long-Term Outcomes of Early Loading of Straumann Implant-Supported Fixed Segmented Bridgeworks in Edentulous Maxillae: A 10-Year Prospective Study                                                                            | Zhang X.-X.; Shi J.-Y.; Gu Y.-X.; Lai H.-C.                                                                                                                                                                                                                                                      | 2016 |
| Comparison of peri-implant clinical and radiographic inflammatory parameters and whole salivary destructive inflammatory cytokine profile among obese and non-obese men                                                       | Abduljabbar T.; Al-Sahaly F.; Kellesarian S.V.; Kellesarian T.V.; Al-Anazi M.; Al-Khathami M.; Javed F.; Vohra F.                                                                                                                                                                                | 2016 |
| Success of dental implants in vascularised fibular osteoseptocutaneous flaps used as onlay grafts after marginal mandibulectomy                                                                                               | Chang Y.-M.; Pan Y.-H.; Shen Y.-F.; Chen J.-K.; ALDeek N.F.; Wei F.-C.                                                                                                                                                                                                                           | 2016 |
| Immediate implant placement and provisionalization in the aesthetic zone using a flapless or a flap-involving approach: a randomized controlled trial                                                                         | Stoupel J.; Lee C.-T.; Glick J.; Sanz-Miralles E.; Chiuzean C.; Papapanou P.N.                                                                                                                                                                                                                   | 2016 |
| Peri-implant bone loss around platform-switched Morse taper connection implants: a prospective 60-month follow-up study                                                                                                       | Cassetta M.; Driver A.; Brandetti G.; Calasso S.                                                                                                                                                                                                                                                 | 2016 |
| Interest in dental implantology and preferences for implant therapy: a survey of Victorian dentists                                                                                                                           | Cheung M.C.; Kao P.; Lee N.; Sivathanan D.; Vong C.W.; Zhu J.; Polster A.; Darby I.                                                                                                                                                                                                              | 2016 |

|                                                                                                                                                                                                         |                                                                                                                                                                                         |      |
|---------------------------------------------------------------------------------------------------------------------------------------------------------------------------------------------------------|-----------------------------------------------------------------------------------------------------------------------------------------------------------------------------------------|------|
| Antimicrobial photodynamic therapy of <i>S. mutans</i> biofilms attached to relevant dental materials                                                                                                   | Zoccolillo M.L.; Rogers S.C.; Mang T.S.                                                                                                                                                 | 2016 |
| Light emitting diode mediated photobiomodulation therapy improves orthodontic tooth movement and miniscrew stability: A randomized controlled clinical trial                                            | Ekizer A.; Türker G.; Uysal T.; Güray E.; Taşdemir Z.                                                                                                                                   | 2016 |
| Application of 3-Dimensional Computed Tomographic Image Guidance to WATCHMAN Implantation and Impact on Early Operator Learning Curve: Single-Center Experience                                         | Wang D.D.; Eng M.; Kupsky D.; Myers E.; Forbes M.; Rahman M.; Zaidan M.; Parikh S.; Wyman J.; Pantelic M.; Song T.; Nadig J.; Karabon P.; Greenbaum A.; O'Neill W.                      | 2016 |
| Effect of conscious sedation vs general anesthesia on early neurological improvement among patients with ischemic stroke undergoing endovascular thrombectomy: A randomized clinical trial              | Schönenberger S.; Uhlmann L.; Hacke W.; Schieber S.; Mundiyanapurath S.; Purrucker J.C.; Nagel S.; Klose C.; Pfaff J.; Bendszus M.; Ringleb P.A.; Kieser M.; Möhlenbruch M.A.; Bösel J. | 2016 |
| Feasibility and safety of Reveal LINQ insertion in a sterile procedure room versus electrophysiology laboratory                                                                                         | Wong G.R.; Lau D.H.; Middeldorp M.E.; Harrington J.A.; Stolcman S.; Wilson L.; Twomey D.J.; Kumar S.; Munawar D.A.; Khokhar K.B.; Mahajan R.; Sanders P.                                | 2016 |
| Pro-inflammatory cytokines at zirconia implants and teeth. A cross-sectional assessment                                                                                                                 | Cionca N.; Hashim D.; Cancela J.; Giannopoulou C.; Mombelli A.                                                                                                                          | 2016 |
| Effect of oral hygiene maintenance on HbA1c levels and peri-implant parameters around immediately-loaded dental implants placed in type-2 diabetic patients: 2 years follow-up                          | Al Amri M.D.; Kellesarian S.V.; Al-Kheraif A.A.; Malmstrom H.; Javed F.; Romanos G.E.                                                                                                   | 2016 |
| Assessment of Myeloperoxidase and Nitric Levels around Dental Implants and Natural Teeth as a Marker of Inflammation: A Comparative Study                                                               | Kulkarni G.H.; Jadhav P.; Kulkarni K.; Shinde S.V.; Patil Y.B.; Kumar M.                                                                                                                | 2016 |
| The effects of diode laser on <i>Staphylococcus aureus</i> biofilm and <i>Escherichia coli</i> lipopolysaccharide adherent to titanium oxide surface of dental implants. An in vitro study              | Giannelli M.; Landini G.; Materassi F.; Chellini F.; Antonelli A.; Tani A.; Zecchi-Orlandini S.; Rossolini G.M.; Bani D.                                                                | 2016 |
| Implants in free fibula flap supporting dental rehabilitation – Implant and peri-implant related outcomes of a randomized clinical trial                                                                | Kumar V.V.; Ebenezer S.; Kämmerer P.W.; Jacob P.C.; Kuriakose M.A.; Hedne N.; Wagner W.; Al-Nawas B.                                                                                    | 2016 |
| Internal- vs External-Connection Single Implants: A Retrospective Study in an Italian Population Treated by Certified Prosthodontists                                                                   | Vigolo P.; Gracis S.; Carboncini F.; Mutinelli S.                                                                                                                                       | 2016 |
| Long-term outcomes after vestibuloplasty with a porcine collagen matrix (Mucograft®) versus the free gingival graft: a comparative prospective clinical trial                                           | Schmitt C.M.; Moest T.; Lutz R.; Wehrhan F.; Neukam F.W.; Schlegel K.A.                                                                                                                 | 2016 |
| A Two-Year Evaluation of a Sloped Marginal Contour Implant System Placed in Healed Sites                                                                                                                | Lee P.K.; Siu A.S.                                                                                                                                                                      | 2016 |
| Assessment of Marginal Peri-implant Bone-Level Short-Length Implants Compared with Standard Implants Supporting Single Crowns in a Controlled Clinical Trial: 12-Month Follow-up                        | Mendoza-Azpur G.; Lau M.; Valdivia E.; Rojas J.; Muñoz H.; Nevins M.                                                                                                                    | 2016 |
| Esthetic assessment of immediately restored implants combined with GBR and free connective tissue graft                                                                                                 | Kolerman R.; Nissan J.; Mijiritsky E.; Hamoudi N.; Mangano C.; Tal H.                                                                                                                   | 2016 |
| Clinical, microbiologic and radiologic assessment of soft and hard tissues surrounding zygomatic implants: a retrospective study                                                                        | Lombardo G.; D'Agostino A.; Trevisiol L.; Romanelli M.G.; Mascellaro A.; Gomez-Lira M.; Pardo A.; Favero V.; Nocini P.F.                                                                | 2016 |
| Peri-implant bone response to retrieved human zirconia oral implants after a 4-year loading period: A histologic and histomorphometric evaluation of 22 cases                                           | Kohal R.-J.; Schwindling F.S.; Bächle M.; Spies B.C.                                                                                                                                    | 2016 |
| Different configuration of socket shield technique in peri-implant bone preservation: An experimental study in dog mandible                                                                             | Guirado J.L.C.; Troiano M.; López-López P.J.; Ramírez-Fernandez M.P.; de Val J.E.M.S.; Marin J.M.G.; Gehrke S.A.                                                                        | 2016 |
| A Comparison of Tapered and Nontapered Implants in the Minipig                                                                                                                                          | Cochran D.; Stavropoulos A.; Obrecht M.; Pippenger B.; Dard M.                                                                                                                          | 2016 |
| Soft and Hard Tissue Changes Following Immediate Placement or Immediate Restoration of Single-Tooth Implants in the Esthetic Zone: A Systematic Review and Meta-Analysis                                | Yan Q.; Xiao L.-Q.; Su M.-Y.; Mei Y.; Shi B.                                                                                                                                            | 2016 |
| Micromovement Evaluation of Original and Compatible Abutments at the Implant-abutment Interface                                                                                                         | Berberi A.; Maroun D.; Kanj W.; Amine E.Z.; Philippe A.                                                                                                                                 | 2016 |
| Saving an Integrating Implant Involved with Endodontic Implant Pathology Using Surgical Treatment                                                                                                       | Chung S.H.; Park Y.-S.; Bae K.-S.; Baek S.-H.; Kum K.-Y.; Lee W.; Shon W.-J.                                                                                                            | 2016 |
| Retrospective Cohort Study of 4,591 Straumann Implants Placed in 2,060 Patients in Private Practice with up to 10-Year Follow-up: The Relationship Between Crestal Bone Level and Soft Tissue Condition | French D.; Cochran D.L.; Ofec R.                                                                                                                                                        | 2016 |
| Orbital and Periorbital Emphysema Following Maxillary Sinus Floor Elevation: A Case Report and Literature Review                                                                                        | Farina R.; Zaetta A.; Minenna L.; Trombelli L.                                                                                                                                          | 2016 |
| Current perioperative use of orodental antiseptics in implant surgery in Bulgaria                                                                                                                       | Shuleva S.; Zkik A.; Chalem Y.                                                                                                                                                          | 2016 |
| Long term outcomes of same-day discharged patient after percutaneous coronary intervention in stand-alone centers                                                                                       | Blachut A.; Pruski M.; Trendel W.; Janas A.; Kies R.S.                                                                                                                                  | 2016 |
| Left atrial appendage characteristics evaluated by computed tomography following closure with Watchman device                                                                                           | Kupsky D.; Wang D.D.; Eng M.; Song T.; Pantelic M.; Nadig J.; Greenbaum A.; O'Neill W.                                                                                                  | 2016 |
| Fate of irregular protrusion after second-generation drug-eluting stent implantation: Serial optical coherence tomography study                                                                         | Sonoda S.; Sanuki Y.; Muraoka Y.; Takami H.; Shimizu A.; Kitagawa M.; Tsuda Y.; Araki M.; Otsuji Y.                                                                                     | 2016 |
| Percutaneous nephrolithotripsy in elderly patients: Assessing perioperative morbidity and one-year renal function                                                                                       | Zaidun S.M.; Nagappan P.; Malek R.                                                                                                                                                      | 2016 |
| Internal carotid web (atypical fibromuscular dysplasia): High stroke recurrence and amenability to stenting                                                                                             | Hausssen D.; Bouslama M.; Grossberg J.A.; Belagaje S.R.; Allan J.; Pradilla G.; Frankel M.R.; Nogueira R.G.                                                                             | 2016 |
| Impact of a chronic smoking habit on the osteo-immunoinflammatory mediators in the peri-implant fluid of clinically healthy dental implants                                                             | Negri B.M.; Pimentel S.P.; Casati M.Z.; Cirano F.R.; Casarin R.C.; Ribeiro F.V.                                                                                                         | 2016 |
| Changes in Peri-Implant Bone Level and Effect of Potential Influential Factors on Dental Implants in Irradiated and Nonirradiated Patients                                                              | Ernst N.; Sachse C.; Raguse J.D.; Stromberger C.; Nelson K.; Nahles S.                                                                                                                  | 2016 |

|                                                                                                                                                                                                     |                                                                                                                                                                             |      |
|-----------------------------------------------------------------------------------------------------------------------------------------------------------------------------------------------------|-----------------------------------------------------------------------------------------------------------------------------------------------------------------------------|------|
| Following Multimodal Therapy Due to Head and Neck Cancer: A Retrospective Study                                                                                                                     |                                                                                                                                                                             |      |
| Management of Peri-implant Diseases                                                                                                                                                                 | Patel A.                                                                                                                                                                    | 2016 |
| Current status of the influence of osteoporosis on periodontology and implant dentistry                                                                                                             | Chambrone L.                                                                                                                                                                | 2016 |
| Evaluation of peri-implant crevicular fluid prostaglandin E2 levels in augmented extraction sockets by different biomaterials                                                                       | Alkan E.A.; Tüter G.; Parlar A.; Yücel A.; Kurtiş B.                                                                                                                        | 2016 |
| The Effect of Platform Switching on Periimplant Crevicular Fluid Content During Early Wound Healing                                                                                                 | Chien H.-H.; Meng H.-W.; Gross A.C.; Eubank T.D.; Yildiz V.O.; Leblebicioglu B.                                                                                             | 2016 |
| Apical/Retrograde Periimplantitis/Implant Periapical Lesion: Etiology, Risk Factors, and Treatment Options: A Systematic Review                                                                     | Ramanauskaite A.; Juodzbalys G.; Tözüm T.F.                                                                                                                                 | 2016 |
| Effect of vertical misfit and clip material on stress distribution of overdentures under masticatory loading                                                                                        | dos Santos M.B.F.; Zen B.M.; Bacchi A.                                                                                                                                      | 2016 |
| Controlled release drug delivery systems to improve post-operative pharmacotherapy                                                                                                                  | Bhusal P.; Harrison J.; Sharma M.; Jones D.S.; Hill A.G.; Svirskis D.                                                                                                       | 2016 |
| Safety and efficacy of endoscopic ultrasound guided drainage of walled-off pancreatic necrosis using lumen apposing metal stents (hot axios)                                                        | Cooper C.J.; Dawwas M.; Mardini H.                                                                                                                                          | 2016 |
| Cardiovascular Outcomes Following Rotational Atherectomy: A UK Multicentre Experience                                                                                                               | Eftychiou C.; Barmby D.S.; Wilson S.J.; Ubaid S.; Markwick A.J.; Makri L.; Blaxill J.M.; Spratt J.C.; Gunning M.; Greenwood J.P.                                            | 2016 |
| Radioactive stent for esophagus carcinoma                                                                                                                                                           | Herskovic A.; Rivard M.J.; Hoopes P.J.; Rothstein R.; Moodie K.L.; Hussain Z.; Swanson L.; Strawbridge R.R.; Saunders J.K.; Corcoran K.; Townsend A.; Hingston J.; Clerc C. | 2016 |
| Rosuvastatin for Reduction of Myocardial Damage during Coronary Angioplasty - the Remedy Trial                                                                                                      | Briguori C.; Madonna R.; Zimarino M.; Calabrò P.; Quintavalle C.; Salomone M.; Condorelli G.; De Caterina R.                                                                | 2016 |
| Does pre-operative sampling predict intra-operative cultures and antibiotic sensitivities in knee replacements revised for infection?: a study using the NJR dataset                                | Holleyman R.J.; Deehan D.J.; Charlett A.; Gould K.; Baker P.N.                                                                                                              | 2016 |
| Acute pancreatitis after removal of retained pancreatic duct stent placed for post-ERCP pancreatitis prophylaxis: A rare complication                                                               | Farrell R.; Shirodkar M.; Ho I.K.                                                                                                                                           | 2016 |
| Resolution of pancreatopleural fistula with pancreatic duct stent                                                                                                                                   | Sunkara T.; Campo L.; Etienne D.; Upadhyay S.; Babich J.P.                                                                                                                  | 2016 |
| Antibiofilm activity of sandblasted and laser-modified titanium against microorganisms isolated from peri-implantitis lesions                                                                       | Drago L.; Bortolin M.; De Vecchi E.; Agrappi S.; Weinstein R.L.; Mattina R.; Francetti L.                                                                                   | 2016 |
| Effects of Surface Conditions of Titanium Dental Implants on Bacterial Adhesion                                                                                                                     | Chen C.-J.; Ding S.-J.; Chen C.-C.                                                                                                                                          | 2016 |
| Maintaining Osseointegration: Understanding, preventing, and treating Risk Factors for Peri-implant Diseases                                                                                        | Danesh-Sani S.A.                                                                                                                                                            | 2016 |
| Temperature evaluation of dental implant surface irradiated with high-power diode laser                                                                                                             | Rios F.G.; Viana E.R.; Ribeiro G.M.; González J.C.; Abelenda A.; Peruzzo D.C.                                                                                               | 2016 |
| A Pilot Study on Mandibular Overdentures Retained By Mini Dental Implants: Marginal Bone Level Changes and Patient-Based Ratings of Clinical Outcome                                                | Zygogiannis K.; Wismeijer D.; Parsa A.                                                                                                                                      | 2016 |
| Letter to the Editor: Re: Decontamination of Anodized Implant Surface With Different Modalities for Peri-Implantitis Treatment: Lasers and Mechanical Debridement With Citric Acid                  | Giannelli M.; Bani D.                                                                                                                                                       | 2016 |
| Transmucosal Implant Placement with Submarginal Connective Tissue Graft in Area of Shallow Buccal Bone Dehiscence: A Three-Year Follow-Up Case Series                                               | Stefanini M.; Felice P.; Mazzotti C.; Marzadori M.; Gherlone E.F.; Zucchelli G.                                                                                             | 2016 |
| A Double-Blind Randomized Trial Comparing Implants with Laser-Microtextured and Machined Collar Surfaces: Microbiologic and Clinical Results                                                        | Guarnieri R.; Rappelli G.; Piemontese M.; Procaccini M.; Quaranta A.                                                                                                        | 2016 |
| Immediate Loading of Implants in the Edentulous Maxilla with a Fixed Provisional Restoration without Bone Augmentation: A Report on 5-Year Outcomes Data Obtained from a Prospective Clinical Trial | Toljanic J.A.; Ekstrand K.; Baer R.A.; Thor A.                                                                                                                              | 2016 |
| Split-Mouth Comparison of Splinted and Nonsplinted Prostheses on Short Implants: 3-Year Results                                                                                                     | Clelland N.; Chaudhry J.; Rashid R.G.; McGlumphy E.                                                                                                                         | 2016 |
| Soft tissue augmentation procedures at second-stage surgery: a systematic review                                                                                                                    | Bassetti R.G.; Stähli A.; Bassetti M.A.; Sculean A.                                                                                                                         | 2016 |
| High risk population for MRONJ onset: Oral condition of oncologic and hematologic patients undergoing individual preventive program                                                                 | Vecchiatini R.; Petrucci V.; Mobilio N.; Guarnelli M.E.; Frassoldati A.; Cuneo A.; Trombelli L.                                                                             | 2016 |
| Comparison of Marginal Bone Changes with Internal Conus and External Hexagon Design Implant Systems: A Prospective, Randomized Study                                                                | Cooper L.F.; Tarnow D.; Froum S.; Moriarty J.; De Kok I.J.                                                                                                                  | 2016 |
| Immediate placement of dental implants in infected dental extraction sockets                                                                                                                        | Patel N.; Young H.; Anwar S.; Kwok J.                                                                                                                                       | 2016 |
| Effects of glycemic control in patients with type II diabetes mellitus on dental implant survival                                                                                                   | Lee J.S.; Tolomeo P.G.; Miller E.J.                                                                                                                                         | 2016 |
| Selective serotonin reuptake inhibitors and dental implant osseointegration                                                                                                                         | Tolomeo P.G.; Lee J.S.; Miller E.J.                                                                                                                                         | 2016 |
| Computer-aided flapless implant surgery and immediate loading. A technical note                                                                                                                     | Baruffaldi A.; Poli P.P.; Baruffaldi A.; Giberti L.; Pigozzo M.; Maiorana C.                                                                                                | 2016 |
| Early loading of delayed versus immediately placed implants in the anterior mandible: A pilot comparative clinical study                                                                            | Koirala D.P.; Singh S.V.; Chand P.; Siddharth R.; Jurel S.K.; Aggarwal H.; Tripathi S.; Ranabhatt R.; Mehrotra D.                                                           | 2016 |
| Marginal and apical bone stability after staged sinus floor augmentation using bone condensing implants with variable-thread design: a two-dimensional analysis                                     | Younes F.; Eghbali A.; De Troyer S.; De Bruyckere T.; Cleymaet R.; Cosyn J.                                                                                                 | 2016 |

|                                                                                                                                                                                                                                            |                                                                                                                                                                                                                   |      |
|--------------------------------------------------------------------------------------------------------------------------------------------------------------------------------------------------------------------------------------------|-------------------------------------------------------------------------------------------------------------------------------------------------------------------------------------------------------------------|------|
| Netrin-1 is highly expressed and required in inflammatory infiltrates in wear particle-induced osteolysis                                                                                                                                  | Mediero A.; Ramkhelawon B.; Wilder T.; Purdue P.E.; Goldring S.R.; Dewan M.Z.; Loomis C.; Moore K.J.; Cronstein B.N.                                                                                              | 2016 |
| Unstable proximal femur fractures treated with proximal femoral locking plates: A retrospective, multicenter study of 111 cases                                                                                                            | Collinge C.A.; Hymes R.; Archdeacon M.; Streubel P.; Obrensky W.; Weber T.; Watson J.T.; Lowenberg D.                                                                                                             | 2016 |
| Prolonged antimicrobial durability of a sodium mercaptoethane sulfonate + minocycline + rifampin combination in an in situ melting, bioabsorbable wrap for preventing tissue expander infections following breast reconstruction surgeries | Rosenblatt J.; Reitzel R.; Viola G.M.; Selber J.; Raad I.                                                                                                                                                         | 2016 |
| PECS block and parasternal block in a patient with recent ischemic stroke                                                                                                                                                                  | Fusco P.; Paladini G.; Petrucci E.; Scimia P.; Vacca F.; Tonelli E.; Pozzone T.; Marinangeli F.                                                                                                                   | 2016 |
| Balloon tibioplasty for reduction of depressed tibial plateau fractures: Preliminary radiographic and clinical results                                                                                                                     | Ollivier M.; Turati M.; Munier M.; Lunebourg A.; Argenson J.-N.; Parratte S.                                                                                                                                      | 2016 |
| Longterm follow up in patients with mid-urethral slings with BMI greater than 40                                                                                                                                                           | ElShatanouf S.; Griffin M.A.; Wang Y.; Richardson D.; Atiemo H.; Jamil M.; Yousif M.; Matthews A.; Luck A.                                                                                                        | 2016 |
| Does bariatric surgery prior to total hip or knee arthroplasty reduce post-operative complications and improve clinical outcomes for obese patients?: Systematic review and meta-analysis                                                  | Smith T.O.; Aboelmagd T.; Hing C.B.; MacGregor A.                                                                                                                                                                 | 2016 |
| Risk of peri-implantitis in patients with diabetes mellitus: A meta-analysis                                                                                                                                                               | Tseng K.-C.; Zheng X.-Y.; Qu X.-H.; Lu E.-Y.                                                                                                                                                                      | 2016 |
| An innovative therapy for peri-implantitis based on radio frequency electric current: numerical simulation results and clinical evidence                                                                                                   | Cosoli G.; Scalise L.; Tricarico G.; Tomasini E.P.; Cerri G.                                                                                                                                                      | 2016 |
| Discomfort/pain due to pocket probing at teeth and endosseous implants: a cross-sectional study                                                                                                                                            | Ringeling J.; Parvini P.; Weinbach C.; Nentwig G.-H.; Nickles K.; Eickholz P.                                                                                                                                     | 2016 |
| Complications with allogeneic, cancellous bone blocks in vertical alveolar ridge augmentation: prospective clinical case study and review of the literature                                                                                | Draenert F.G.; Kämmerer P.W.; Berthold M.; Neff A.                                                                                                                                                                | 2016 |
| Periimplant bone regeneration in hydroxyapatite block grafts with mesenchymal stem cells and bone morphogenetic protein-2                                                                                                                  | Park J.-H.; Jung Y.-E.; Kim M.-J.; Hwang S.J.                                                                                                                                                                     | 2016 |
| Early loading of splinted implants supporting a two-unit fixed partial denture in the posterior maxilla: 13-month results from a randomized controlled clinical trial of two different implant systems                                     | Ryu H.-S.; Namgung C.; Heo Y.-K.; Lee J.-H.; Lim Y.-J.                                                                                                                                                            | 2016 |
| The SSTARS (STeroids and STents Against Re-Stenosis) Trial: Different stent alloys and the use of peri-procedural oral corticosteroids to prevent in-segment restenosis after percutaneous coronary intervention                           | Adam Z.; Turley A.; Mason J.M.; Kasim A.S.; Newby D.; Mills N.; Padfield G.; Thompson L.; Morley R.; Hall J.A.; Wright R.A.; Muir D.F.; Sutton A.G.C.; Swanson N.; Carter J.; Bilous R.; Jones S.; De Belder M.A. | 2016 |
| Leadless Cardiac Devices—Pacemakers and Implantable Cardioverter-Defibrillators                                                                                                                                                            | Rutzen-Lopez H.; Silva J.; Helm R.H.                                                                                                                                                                              | 2016 |
| Osteomyelitis-Induced Sequester of Bovine-Derived Bone Mineral/Host Bone Composite 8 Years Post-Sinus Graft: A Case Report                                                                                                                 | Norton M.R.                                                                                                                                                                                                       | 2016 |
| Management considerations for patients with uterine fibroids and concurrent venous thromboembolism                                                                                                                                         | Moulder J.K.; Siedhoff M.T.; Till S.R.; Moll S.                                                                                                                                                                   | 2016 |
| Low-cost, hand-made, mid-urethral sling for the treatment of female stress urinary incontinence: A single-center's 10 year experience                                                                                                      | Alvarez J.; Urzua M.J.; Rondini C.; Kaplan F.; Troncoso F.R.                                                                                                                                                      | 2016 |
| Somatosensory evoked potentials in carotid artery stenting: Effectiveness in ascertaining cerebral ischemic events                                                                                                                         | Adhikari R.B.; Takeda M.; Kolakshyapati M.; Sakamoto S.; Morishige M.; Kiura Y.; Okazaki T.; Shinagawa K.; Ichinose N.; Yamaguchi S.; Kurisu K.                                                                   | 2016 |
| Trends in mesh utilization, surgical complications, and resident participation in transvaginal procedures for pelvic organ prolapse repair: An audit of the national surgical quality improvement program                                  | Matthews C.A.; Badlani G.; Mirzazadeh M.                                                                                                                                                                          | 2016 |
| Effectiveness of hypochlorous acid to reduce the biofilms on titanium alloy surfaces in vitro                                                                                                                                              | Chen C.-J.; Chen C.-C.; Ding S.-J.                                                                                                                                                                                | 2016 |
| Zirconia Dental Implants: Investigation of Clinical Parameters, Patient Satisfaction, and Microbial Contamination                                                                                                                          | Holländer J.; Lorenz J.; Stübinger S.; Hölscher W.; Heidemann D.; Ghanaati S.; Sader R.                                                                                                                           | 2016 |
| Bacterial Biofilm Morphology on a Failing Implant with an Oxidized Surface: A Scanning Electron Microscope Study                                                                                                                           | Simion M.; Kim D.M.; Pieroni S.; Nevins M.; Cassinelli C.                                                                                                                                                         | 2016 |
| Antimicrobial Agents Used in the Treatment of Peri-Implantitis Alter the Physicochemistry and Cytocompatibility of Titanium Surfaces                                                                                                       | Kotsakis G.A.; Lan C.; Barbosa J.; Lill K.; Chen R.; Rudney J.; Aparicio C.                                                                                                                                       | 2016 |
| Emerging Issues Associated With Peri-implant Disease                                                                                                                                                                                       | Rosen P.S.; Froum S.J.                                                                                                                                                                                            | 2016 |
| Initial Crestal Bone Loss After Implant Placement with Flapped or Flapless Surgery-A Prospective Cohort Study                                                                                                                              | Maier F.-M.                                                                                                                                                                                                       | 2016 |
| Do we need keratinized mucosa for a healthy peri-implant soft tissue?                                                                                                                                                                      | Esfahanizadeh N.; Daneshparvar N.; Motalebi S.; Akhondi N.; Askarpour F.; Davaie S.                                                                                                                               | 2016 |
| Influence of Connection Types and Implant Number on the Biomechanical Behavior of Mandibular Full-Arch Rehabilitation                                                                                                                      | Sousa R.M.; Simamoto-Junior P.C.; Fernandes-Neto A.J.; Sloten J.V.; Jacques S.V.; Pessoa R.S.                                                                                                                     | 2016 |
| Implant-Related Gingival Recession: Pilot Case Series Presents Novel Technique and Scoring Template                                                                                                                                        | El Askary Ae.IS.; Ghallab N.A.; Tan S.-C.; Rosen P.S.; Shawkat A.                                                                                                                                                 | 2016 |
| Bilamina cortical tenting grafting technique for three-dimensional reconstruction of severely atrophic alveolar ridges in anterior maxillae: A 6-year prospective study                                                                    | Yu H.; Chen L.; Zhu Y.; Qiu L.                                                                                                                                                                                    | 2016 |
| Partial Rehabilitation with Distally Tilted and Straight Implants in the Posterior Maxilla with Immediate Loading Protocol: A Retrospective Cohort Study with 5-Year Follow-up                                                             | Queridinha B.M.; Almeida R.F.; Felino A.; de Araújo Nobre M.; Maló P.                                                                                                                                             | 2016 |
| Peri-implant bony overgrowth as a cause of revision surgery in auditory osseointegrated implantation                                                                                                                                       | Tompkins J.J.; Petersen D.K.; Sharbel D.D.; McKinnon B.J.; MacDonald C.B.                                                                                                                                         | 2016 |
| Complications and functional outcome after fixation of distal tibia fractures with locking plate - A multicentre study                                                                                                                     | Viberg B.; Kleven S.; Hamborg-Petersen E.; Skov O.                                                                                                                                                                | 2016 |



|                                                                                                                                                                                                          |                                                                                                                                                           |      |
|----------------------------------------------------------------------------------------------------------------------------------------------------------------------------------------------------------|-----------------------------------------------------------------------------------------------------------------------------------------------------------|------|
| Chronic Total Occlusion – Percutaneous Coronary Intervention (CTO-PCI) Experience in a Single, Multi-operator Australian Centre: Need for dedicated CTO-PCI programs                                     | BoganaShanmugam V.; Psaltis P.J.; Wong D.T.; Seneviratne S.; Cameron J.; Meredith I.T.; Malaipayan Y.                                                     | 2016 |
| Health, Maintenance, and Recovery of Soft Tissues around Implants                                                                                                                                        | Wang Y.; Zhang Y.; Miron R.J.                                                                                                                             | 2016 |
| 10-year prospective cohort follow-up of immediately restored XiVE implants                                                                                                                               | Degidi M.; Nardi D.; Piattelli A.                                                                                                                         | 2016 |
| Clinical association of Spirochaetes and Synergistetes with peri-implantitis                                                                                                                             | Belibasakis G.N.; Mir-Mari J.; Sahrman P.; Sanz-Martin I.; Schmidlin P.R.; Jung R.E.                                                                      | 2016 |
| Retrospective analysis of the prevalence of peri-implant diseases in non-smoking patients rehabilitated with a fixed full-arch restoration, supported by two mesial axial and two distal tilted implants | Cavalli N.; Austoni C.; Corbella S.; Taschieri S.; Barbaro B.; Azzola F.; Francetti L.                                                                    | 2016 |
| The influence of peri-implant keratinized mucosa on brushing discomfort and peri-implant tissue health                                                                                                   | Souza A.B.; Tormena M.; Matarazzo F.; Araújo M.G.                                                                                                         | 2016 |
| Success of 6-mm Implants with Single-Tooth Restorations: A 3-year Randomized Controlled Clinical Trial                                                                                                   | Sahrman P.; Naenni N.; Jung R.E.; Held U.; Truninger T.; Hämmerle C.H.; Attin T.; Schmidlin P.R.                                                          | 2016 |
| Post-treatment supportive care for the natural dentition and dental implants                                                                                                                             | Armitage G.C.; Xenoudi P.                                                                                                                                 | 2016 |
| Long-term Survival of Straumann Dental Implants with TPS Surfaces: A Retrospective Study with a Follow-up of 12 to 23 Years                                                                              | Becker S.T.; Beck-Broichsitter B.E.; Rossmann C.M.; Behrens E.; Jochens A.; Wiltfang J.                                                                   | 2016 |
| Residual Roots as an Anatomical Guide for Implant Placement: Case Series With Two-Year Follow-up                                                                                                         | Mahesh L.; Kurtzman G.M.; Schwartz D.; Shukla S.                                                                                                          | 2016 |
| Successful Surgical Protocols in the Treatment of Peri-Implantitis: A Narrative Review of the Literature                                                                                                 | Froum S.J.; Dagba A.S.; Shi Y.; Perez-Asenjo A.; Rosen P.S.; Wang W.C.                                                                                    | 2016 |
| The Effect of Insertion Torque on the Clinical Outcome of Single Implants: A Randomized Clinical Trial                                                                                                   | Barone A.; Alfonsi F.; Derchi G.; Tonelli P.; Toti P.; Marchionni S.; Covani U.                                                                           | 2016 |
| Compromised Hard- and Soft-Tissue Architecture: Immediate Implant Placement and Provisionalization in the Esthetic Zone                                                                                  | Gober D.D.; Weitz M.L.; Korn R.J.                                                                                                                         | 2016 |
| Radiographic evaluation of conical tapered platform-switched implants in the posterior mandible: 1-year results of a two-center prospective study                                                        | Moergel M.; Rocha S.; Messias A.; Nicolau P.; Guerra F.; Wagner W.                                                                                        | 2016 |
| Analysis of Effectiveness of Different Rotational Instruments in Implantoplasty: An In Vitro Study                                                                                                       | de Souza Júnior J.M.; Oliveira de Souza J.G.; Pereira Neto A.L.; Iaculli F.; Piattelli A.; Bianchini M.A.                                                 | 2016 |
| Osteotome Sinus Floor Elevation without Grafting: A 10-Year Prospective Study                                                                                                                            | Nedir R.; Nurdin N.; Vazquez L.; Abi Najm S.; Bischof M.                                                                                                  | 2016 |
| Effects of angulated and non-angulated mini-implants abutment supporting mandibular overdenture on peri-implant bone height                                                                              | Arafa K.A.O.                                                                                                                                              | 2016 |
| Maxillary Four Implant-retained Overdentures via Locator® Attachment: Intermediate-term Results from a Retrospective Study                                                                               | Wang F.; Monje A.; Huang W.; Zhang Z.; Wang G.; Wu Y.                                                                                                     | 2016 |
| “Partner prosthesis Panic”: Management of female sexual dysfunction in partners of men undergoing penile prosthesis implantation                                                                         | Hartzell R.; King S.A.; Goldstein I.                                                                                                                      | 2016 |
| The modified stepwise ablation guided by low-dose ibutilide in chronic atrial fibrillation trial (The MAGIC-AF Study)                                                                                    | Singh S.M.; D'Avila A.; Kim Y.-H.; Aryana A.; Mangrum J.M.; Michaud G.F.; Dukkipati S.R.; Barrett C.D.; Heist E.K.; Parides M.K.; Thorpe K.E.; Reddy V.Y. | 2016 |
| Pancreatic duct guidewire placement for biliary cannulation for the prevention of post-endoscopic retrograde cholangiopancreatography (ERCP) pancreatitis                                                | Tse F.; Yuan Y.; Bukhari M.; Leontiadis G.I.; Moayyedi P.; Barkun A.                                                                                      | 2016 |
| Dental floss as a possible risk for the development of peri-implant disease: an observational study of 10 cases                                                                                          | van Velzen F.J.; Lang N.P.; Schulten E.A.; Ten Bruggenkate C.M.                                                                                           | 2016 |
| Collagen-Coated Bovine Bone in Peri-implantitis Defects: A Pilot Study on a Novel Approach                                                                                                               | Rotenberg S.A.; Steiner R.; Tatakis D.N.                                                                                                                  | 2016 |
| Long-term outcomes of oral rehabilitation with dental implants in HIV-positive patients: A retrospective case series                                                                                     | Gay-Escoda C.; Pérez-Álvarez D.; Camps-Font O.; Figueiredo R.                                                                                             | 2016 |
| Removal of dental implants: review of five different techniques                                                                                                                                          | Stajčić Z.; Stojčev Stajčić L.J.; Kalanović M.; Đinić A.; Divekar N.; Rodić M.                                                                            | 2016 |
| Bactericidal Effect of Erbium-Doped Yttrium Aluminum Garnet Laser and Photodynamic Therapy on Aggregatibacter Actinomycetemcomitans Biofilm on Implant Surface                                           | Saffarpour A.; Fekrazad R.; Heibati M.N.; Bahador A.; Saffarpour A.; Rohn A.R.; Iranparvar A.; KharaziFard M.J.                                           | 2016 |
| Management of Limited Vertical Bone Height in the Posterior Mandible: Short Dental Implants Versus Nerve Lateralization With Standard Length Implants                                                    | Dursun E.; Keceli H.G.; Uysal S.; Güngör H.; Muhtarogullari M.; Tözüm T.F.                                                                                | 2016 |
| Peri-implant Diseases: What do We know and What do We need to know?                                                                                                                                      | Danesh-Sani S.A.                                                                                                                                          | 2016 |
| Transfer of Bacteria into the Internal Cavity of Dental Implants After Application of Disinfectant or Sealant Agents In Vitro                                                                            | Podhorsky A.; Biscopig S.; Rehmann P.; Streckbein P.; Domann E.; Wöstmann B.                                                                              | 2016 |
| Insufficient evidence to support the use of laser therapy for peri-implantitis                                                                                                                           | Hur Y.; Ogata Y.                                                                                                                                          | 2016 |
| Research progress in peri-implant soft tissue engineering augmentation method                                                                                                                            | Pei T.; Yu H.; Wen C.; Guo T.; Zhou Y.; Peng H.                                                                                                           | 2016 |
| Histopathological Features of Secondary Squamous Cell Carcinoma Around a Dental Implant in the Mandible after Chemoradiotherapy: A Case Report with a Clinicopathological Review                         | Nariai Y.; Kanno T.; Sekine J.                                                                                                                            | 2016 |
| Turned Implants in Vertical Augmented Bone: A Retrospective Study with 13 to 21 Years Follow-Up                                                                                                          | Simion M.; Ferrantino L.; Idotta E.; Zarone F.                                                                                                            | 2016 |
| The Pathogenesis of Implant-Related Reactive Lesions: A Clinical, Histologic and Polarized Light Microscopy Study                                                                                        | Halperin-Sternfeld M.; Sabo E.; Akrish S.                                                                                                                 | 2016 |
| Psychological Interventions for Poor Oral Health: A Systematic Review                                                                                                                                    | Werner H.; Hakeberg M.; Dahlström L.; Eriksson M.; Sjögren P.; Strandell A.; Svanberg T.; Svensson L.; Wide Boman U.                                      | 2016 |

|                                                                                                                                                                                   |                                                                                                                                                                                                                                             |      |
|-----------------------------------------------------------------------------------------------------------------------------------------------------------------------------------|---------------------------------------------------------------------------------------------------------------------------------------------------------------------------------------------------------------------------------------------|------|
| Evaluation of Temperature and Roughness Alteration of Diode Laser Irradiation of Zirconia and Titanium for Peri-Implantitis Treatment                                             | Kushima S.S.; Nagasawa M.; Shibli J.A.; Brugnera A.; Rodrigues J.A.; Cassoni A.                                                                                                                                                             | 2016 |
| Botulinum Toxin Type A as Preoperative Treatment for Immediately Loaded Dental Implants Placed in Fresh Extraction Sockets for Full-Arch Restoration of Patients With Bruxism     | Mijiritsky E.; Mortellaro C.; Rudberg O.; Fahn M.; Basegmez C.; Levin L.                                                                                                                                                                    | 2016 |
| Titanium Mesh Technique in Rehabilitation of Totally Edentulous Atrophic Maxillae: A Retrospective Case Series                                                                    | Pellegrino G.; Lizio G.; Corinaldesi G.; Marchetti C.                                                                                                                                                                                       | 2016 |
| A Long-Term Prospective Evaluation of Marginal Bone Level Change Around Different Implant Systems                                                                                 | Lee S.-Y.; Koak J.-Y.; Kim S.-K.; Rhyu I.-C.; Ku Y.; Heo S.-J.; Han C.-H.                                                                                                                                                                   | 2016 |
| The effect of piezoelectric surgery implant osteotomy on radiological and molecular parameters of peri-implant crestal bone loss: a randomized, controlled, split-mouth trial     | Peker Tekdal G.; Bostanci N.; Belibasakis G.N.; Gürkan A.                                                                                                                                                                                   | 2016 |
| Medication-Related Osteonecrosis of the Jaw Around Dental Implants: Implant Surgery-Triggered or Implant Presence-Triggered Osteonecrosis?                                        | Giovannacci I.; Meleti M.; Manfredi M.; Mortellaro C.; Greco Lucchina A.; Bonanini M.; Vescovi P.                                                                                                                                           | 2016 |
| Predictability of short implants (< 10 mm) as a treatment option for the rehabilitation of atrophic maxillae. A systematic review                                                 | Sierra-Sánchez J.-L.; García-Sala-Bonmati F.; Martínez-González A.; García-Dalmau C.; Mañes-Ferrer J.-F.; Brotons-Oliver A.                                                                                                                 | 2016 |
| Ridge augmentation in an organ transplant patient                                                                                                                                 | Dalla Torre D.; Burtcher D.                                                                                                                                                                                                                 | 2016 |
| Effectivity of air-abrasive powder based on glycine and tricalcium phosphate in removal of initial biofilm on titanium and zirconium oxide surfaces in an ex vivo model           | John G.; Becker J.; Schwarz F.                                                                                                                                                                                                              | 2016 |
| Contraceptive hormone therapy induced spontaneous coronary artery dissection                                                                                                      | Shekar C.; Perucki W.; Wankhade C.; Krishna N.                                                                                                                                                                                              | 2016 |
| The Effect of Crown-to-Implant Ratio on the Clinical Performance of Extra-Short Locking-Taper Implants                                                                            | Mangano F.; Frezzato I.; Frezzato A.; Veronesi G.; Mortellaro C.; Mangano C.                                                                                                                                                                | 2016 |
| Parameters Associated with Marginal Bone Loss around Implant after Prosthetic Loading                                                                                             | Koller C.D.; Pereira-Cenci T.; Boscatto N.                                                                                                                                                                                                  | 2016 |
| Catheter ablation for management of ventricular tachycardia in patients on left ventricular assist device support                                                                 | Shabari F.R.; Raman A.S.; Davagustto G.; Sharma S.; Fteddy S.; Mukerji S.S.; Hematpour K.; Venkataraman R.; Gregoric I.D.; Nathan S.S.; Ftajapreyar I.N.; Loyalka P.; Kar B.; Hariharan R.                                                  | 2016 |
| EUS-guided drainage of peri-pancreatic fluid collections without fluoroscopic guidance                                                                                            | Mohamadnejad M.; Sohrabpour A.A.; Yazdi N.; Zamani F.; Malekzadeh R.                                                                                                                                                                        | 2016 |
| Esophago-jejunal anastomosis defect: Beyond a simple leak!                                                                                                                        | Fernandez M.; Lemmers A.; Vandermeeren A.; Toussaint E.; Eisendrach P.; Blero D.; Loly J.-P.; Le Moine O.; Deviere J.; Arvanitakis M.                                                                                                       | 2016 |
| Acute stroke endovascular intervention with emergent carotid artery stenting 22.5 hours after symptom onset - Emphasizing the importance of brain perfusion CT for case selection | Hsieh M.-Y.; Wang W.-J.; Tee B.L.                                                                                                                                                                                                           | 2016 |
| Multi-center post-market registry for the evaluation of robotic assisted PCI                                                                                                      | Madder R.; Campbell P.; Mahmud E.; Wohns D.; Stys T.; Caputo R.; Leimbach M.; Parikh M.; Kasi V.; Weisz G.                                                                                                                                  | 2016 |
| Effect of interleukin 6 -174G>C gene polymorphism on opioid requirements after total hip replacement                                                                              | Białecka M.; Jurewicz A.; Machoy-Mokrzyńska A.; Kurzawski M.; Leźnicka K.; Dziedzic V.; Safranow K.; Drożdżik M.; Bohatyrewicz A.                                                                                                           | 2016 |
| Single centre experience of endovascular intervention in extra and intracranial vertebro-basilar stenosis at a tertiary care centre                                               | Kaur G.; Sharma S.; Latorre J.                                                                                                                                                                                                              | 2016 |
| Assessment and evaluation of quality of life (OHRQOL) of patients with dental implants using the oral health impact profile (OHIP-14) - A clinical study                          | Alzarea B.K.                                                                                                                                                                                                                                | 2016 |
| Impact of Maintenance Therapy for the Prevention of Peri-implant Diseases: A Systematic Review and Meta-analysis                                                                  | Monje A.; Aranda L.; Diaz K.T.; Alarcón M.A.; Bagramian R.A.; Wang H.L.; Catena A.                                                                                                                                                          | 2016 |
| Systemic antibiotics and the risk of superinfection in peri-implantitis                                                                                                           | Verdugo F.; Laksmanna T.; Uribarri A.                                                                                                                                                                                                       | 2016 |
| Peri-implantitis - onset and pattern of progression                                                                                                                               | Derks J.; Schaller D.; Håkansson J.; Wennström J.L.; Tomasi C.; Berglundh T.                                                                                                                                                                | 2016 |
| Recommendations on the clinical application of air polishing for the management of peri-implant mucositis and peri-implantitis                                                    | Schwarz F.; Becker K.; Bastendorf K.-D.; Cardaropoli D.; Chatfield C.; Dunn I.; Fletcher P.; Einwag J.; Louropoulou A.; Mombelli A.; Ower P.; Pavlovic P.; Sahrmann P.; Salvi G.E.; Schmage P.; Takeuchi Y.; Van Der Weijden F.; Renvert S. | 2016 |
| Reosseointegration Following Regenerative Therapy of Tissue-Engineered Bone in a Canine Model of Experimental Peri-Implantitis                                                    | Xu L.; Sun X.; Bai J.; Jiang L.; Wang S.; Zhao J.; Xia L.; Zhang X.; Wen J.; Li G.; Jiang X.                                                                                                                                                | 2016 |
| Long-term retrospective follow-up of turned and moderately rough implants in the edentulous jaw                                                                                   | Vandeweghe S.; Ferreira D.; Vermeersch L.; Mariën M.; De Bruyn H.                                                                                                                                                                           | 2016 |
| A combined peri-implant plastic surgery approach for implants in the esthetic zone using a novel technique: A series of 10 cases                                                  | Baltacıoğlu E.; Korkmaz Y.T.; Korkmaz F.M.; Bağış N.                                                                                                                                                                                        | 2016 |
| Clinical Decisions: Determining When to Save or Remove an Ailing Implant                                                                                                          | Tarnow D.P.; Chu S.J.; Fletcher P.D.                                                                                                                                                                                                        | 2016 |
| Keratinized mucosa around implants in partially edentulous posterior mandible: 10-year results of a prospective comparative study                                                 | Roccuzzo M.; Grasso G.; Dalmaso P.                                                                                                                                                                                                          | 2016 |
| Retrospective study on bone-level and soft-Tissue-level cylindrical implants                                                                                                      | Lopez M.A.; Bassi M.A.; Confalone L.; Gaudio R.M.; Lombardo L.; Lauritano D.                                                                                                                                                                | 2016 |
| Alumina reinforced zirconia implants: 1-year results from a prospective cohort investigation                                                                                      | Spies B.C.; Sperlich M.; Fleiner J.; Stampf S.; Kohal R.-J.                                                                                                                                                                                 | 2016 |
| Modified connective tissue punch technique to increase the vestibular/buccal keratinized tissue on flapless implant surgery: A case series                                        | Bassi M.A.; Andrisani C.; Lopez M.A.; Gaudio R.M.; Lombardo L.; Lauritano D.                                                                                                                                                                | 2016 |

|                                                                                                                                                                                               |                                                                                                                                                                                                                    |      |
|-----------------------------------------------------------------------------------------------------------------------------------------------------------------------------------------------|--------------------------------------------------------------------------------------------------------------------------------------------------------------------------------------------------------------------|------|
| Bone Response and Soft Tissue Changes Around Implants With/Without Abutments Supporting Fixed Partial Dentures: Results From a 3-Year, Prospective, Randomized, Controlled Study              | Göthberg C.; André U.; Gröndahl K.; Thomsen P.; Slotte C.                                                                                                                                                          | 2016 |
| Histological and histomorphometric analyses of narrow implants, crestal and subcrestally placed in severe alveolar atrophy: a study in foxhound dogs                                          | Calvo-Guirado J.L.; Delgado Ruiz R.A.; Ramírez-Fernández M.P.; Abboud M.; Janjic B.; Maté Sánchez de Val J.E.                                                                                                      | 2016 |
| Locators versus magnetic attachment effect on peri-implant tissue health of immediate loaded two implants retaining a mandibular overdenture: a 1-year randomised trial                       | Elsyad M.A.; Mahanna F.F.; Elshahat M.A.; Elshoukoui A.H.                                                                                                                                                          | 2016 |
| Recommendations for implant-retained nasal prostheses after ablative tumor surgery: Minimal surgical aftercare, high implant survival, and satisfied patients                                 | Korfage A.; Raghoobar G.M.; Noorda W.D.; Plaat B.E.; Vissink A.; Visser A.                                                                                                                                         | 2016 |
| Implant Abutment Cleaning by Plasma of Argon: 5-Year Follow-Up of a Randomized Controlled Trial                                                                                               | Canullo L.; Tallarico M.; Peñarrocha-Oltra D.; Monje A.; Wang H.-L.; Peñarrocha-Diogo M.                                                                                                                           | 2016 |
| Periimplantitis: A problem possible to resolve                                                                                                                                                | Kiernicka M.; Wysokińska-Miszczuk J.                                                                                                                                                                               | 2016 |
| Surgical Treatment of Implants Affected by Periimplantitis After 15 Years of Loading: A Case Report                                                                                           | Nicoli L.G.; Pigossi S.C.; Marcantonio C.; Leal Zandim-Barcelos D.; Marcantonio E.                                                                                                                                 | 2016 |
| Long-term safety of SPG stimulation for the treatment of cluster headache (10338)                                                                                                             | Goodman A.; Hillerup S.; Assaf A.T.; Rostgaard J.J.R.; Puche M.; Barloese M.; Jurgens T.; Caparso A.V.; May A.; Jensen R.H.                                                                                        | 2016 |
| Three-Year Clinical and Radiographic Implant Follow-up in Sinus-Lifted Maxilla With Lateral Window Technique                                                                                  | Erdem N.F.; Çiftçi A.; Acar A.H.                                                                                                                                                                                   | 2016 |
| Atrial fibrillation during or after TAVI: Incidence, implications and therapeutical considerations                                                                                            | Vavuranakis M.; Kolokathis A.-M.; Vrachatis D.A.; Kalogeras K.; Magkoutis N.A.; Fradi S.; Ghostine S.; Karamanou M.; Tousoulis D.                                                                                  | 2016 |
| Biological mesh implants for abdominal hernia repair: US food and drug administration approval process and systematic review of its efficacy                                                  | Huerta S.; Varshney A.; Patel P.M.; Mayo H.G.; Livingston E.H.                                                                                                                                                     | 2016 |
| Cochlear implantation in early deafened, late implanted adults: Do they benefit?                                                                                                              | Kumar R.S.; Mawman D.; Sankaran D.; Melling C.; O'Driscoll M.; Freeman S.M.; Lloyd S.K.                                                                                                                            | 2016 |
| Invasive hemodynamic testing in ambulatory left ventricular assist device patients                                                                                                            | Badoe N.; Abdullah K.; Phillips S.; Nabut J.; Rongione A.J.; Desai S.S.; Shah P.                                                                                                                                   | 2016 |
| Infection rates of spinal cord stimulator implants among high risk populations: A multi-center study (10301)                                                                                  | Hoelzer B.; Bendel M.A.; Deer T.R.; Qu W.; Moeschler S.; Falowski S.; Wassef IV C.; Kim C.; Bowman R.; Choi D.; Choi D.Y.; Choe D.; Kim E.; Lerman I.; Mora R.; Wang Z.; Hayek S.M.; Hanes M.; Ade T.; Neuman S.A. | 2016 |
| In vitro activity of taurolidine gel on bacteria associated with periodontitis                                                                                                                | Eick S.; Gloor N.; Püls C.; Zumbun J.; Sculean A.                                                                                                                                                                  | 2016 |
| Slipped capital femoral epiphysis and associated hypothyroidism. A review of the literature with two classic case examples                                                                    | Moyer J.; Jacks L.; Hunter J.D.; Chan G.                                                                                                                                                                           | 2016 |
| Outcomes of total hip arthroplasty, as a salvage procedure, following failed internal fixation of intracapsular fractures of the femoral neck: A systematic review and meta-analysis          | Mahmoud S.S.S.; Pearse E.O.; Hing C.B.; Smith T.O.                                                                                                                                                                 | 2016 |
| Neuromuscular exercise prior to joint arthroplasty in patients with osteoarthritis of the hip or knee                                                                                         | Villadsen A.                                                                                                                                                                                                       | 2016 |
| Role of preoperative biliary stents, bile contamination and antibiotic prophylaxis in surgical site infections after pancreaticoduodenectomy                                                  | Gavazzi F.; Ridolfi C.; Capretti G.; Angiolini M.R.; Morelli P.; Casari E.; Montorsi M.; Zerbi A.                                                                                                                  | 2016 |
| 1-year outcomes with the Absorb bioresorbable scaffold in patients with coronary artery disease: A patient-level, pooled meta-analysis                                                        | Stone G.W.; Gao R.; Kimura T.; Kereiakes D.J.; Ellis S.G.; Onuma Y.; Cheong W.-F.; Jones-Mcmeans J.; Su X.; Zhang Z.; Serruys P.W.                                                                                 | 2016 |
| Modification of Titanium Substrates with Chimeric Peptides Comprising Antimicrobial and Titanium-Binding Motifs Connected by Linkers To Inhibit Biofilm Formation                             | Liu Z.; Ma S.; Duan S.; Xuliang D.; Sun Y.; Zhang X.; Xu X.; Guan B.; Wang C.; Hu M.; Qi X.; Zhang X.; Gao P.                                                                                                      | 2016 |
| Surgical therapy of single peri-implantitis intrabony defects, by means of deproteinized bovine bone mineral with 10% collagen                                                                | Roccuzzo M.; Gaudioso L.; Lungo M.; Dalmasso P.                                                                                                                                                                    | 2016 |
| Into the Paradigm of Local Factors as Contributors for Peri-implant Disease: Short Communication                                                                                              | Monje A.; Galindo-Moreno P.; Tözüm T.F.; Suárez-López del Amo F.; Wang H.-L.                                                                                                                                       | 2016 |
| Clinical and microbiological findings in patients with peri-implantitis: a cross-sectional study                                                                                              | Canullo L.; Peñarrocha-Oltra D.; Covani U.; Botticelli D.; Serino G.; Penarrocha M.                                                                                                                                | 2016 |
| The association between shallow vestibular depth and peri-implant parameters: a retrospective 6 years longitudinal study                                                                      | Halperin-Sternfeld M.; Zigdon-Giladi H.; Machtei E.E.                                                                                                                                                              | 2016 |
| The implant surface characteristics and peri-implantitis. An evidence-based update                                                                                                            | Peixoto C.D.; Almas K.                                                                                                                                                                                             | 2016 |
| Survival, Function, and Complications of Oral Implants Placed in Bone Flaps in Jaw Rehabilitation: A Systematic Review                                                                        | Zhang L.; Ding Q.; Liu C.; Sun Y.; Xie Q.; Zhou Y.                                                                                                                                                                 | 2016 |
| Peri-implant Outcomes with Laser vs Nanosurface Treatment of Early Loaded Implant-Retaining Mandibular Overdentures                                                                           | Hegazy S.; Elmekawy N.; Emera R.M.                                                                                                                                                                                 | 2016 |
| Posterior jaws rehabilitated with partial prostheses supported by 4.0 x 4.0 mm or by longer implants: One-year post-loading results from a multicenter randomised controlled trial            | Felice P.; Checchi L.; Barausse C.; Pistilli R.; Sammartino G.; Masi I.; Ippolito D.R.; Esposito M.                                                                                                                | 2016 |
| Immediate occluding definitive partial fixed prosthesis versus non-occluding provisional restorations - 4-month post-loading results from a pragmatic multicenter randomised controlled trial | Heinemann F.; Grufferty B.; Papavasiliou G.; Dominiak M.; García J.J.; Trullenque-Eriksson A.; Esposito M.                                                                                                         | 2016 |
| Effects of Topical Antibiotic Prophylaxis on Wound Healing After Flapless Implant Surgery: A Pilot Study                                                                                      | Xu L.; Wang Y.; Nguyen V.T.; Chen J.                                                                                                                                                                               | 2016 |
| Bone augmentation at implant dehiscences and fenestrations. A systematic review of randomised controlled trials                                                                               | Merli M.; Merli I.; Raffaelli E.; Pagliaro U.; Nasti L.; Nieri M.                                                                                                                                                  | 2016 |
| Regenerative Medicine for Periodontal and Peri-implant Diseases                                                                                                                               | Larsson L.; Decker A.M.; Nibali L.; Pilipchuk S.P.; Berglundh T.; Giannobile W.V.                                                                                                                                  | 2016 |

|                                                                                                                                                                                                            |                                                                                                                                                                  |      |
|------------------------------------------------------------------------------------------------------------------------------------------------------------------------------------------------------------|------------------------------------------------------------------------------------------------------------------------------------------------------------------|------|
| Relationship Between Long-Term Marginal Bone Loss and Bone Quality, Implant Width, and Surface                                                                                                             | Ibañez C.; Catena A.; Galindo-Moreno P.; Noguerol B.; Magán-Fernández A.; Mesa F.                                                                                | 2016 |
| Past, present and future of local and systemic adjuvant therapies in non-surgical treatment of peri-implantitis and periodontitis: Indications and limitations                                             | Mensi M.; Scotti E.; Francetti L.; Giargia M.; Latronico M.; Camurati A.; Guarnelli M.E.; Rotundo R.                                                             | 2016 |
| Selective responses of human gingival fibroblasts and bacteria on carbon fiber reinforced polyetheretherketone with multilevel nanostructured TiO2                                                         | Wang X.; Lu T.; Wen J.; Xu L.; Zeng D.; Wu Q.; Cao L.; Lin S.; Liu X.; Jiang X.                                                                                  | 2016 |
| Errors in planning implanto-prosthetic rehabilitation - Case report                                                                                                                                        | Barić J.; Sušić M.; Gabrić D.                                                                                                                                    | 2016 |
| Clinical and Retrospective Evaluation of 4.1- or 4.3-mm-Diameter Implants Placed Immediately in the Molar Region: A Preliminary Study                                                                      | Jung D.-W.; Yoon H.-J.                                                                                                                                           | 2016 |
| Antimicrobial photodynamic therapy (aPDT) induction of biofilm matrix architectural and bioadhesive modifications                                                                                          | Mang T.; Rogers S.; Keinan D.; Honma K.; Baier R.                                                                                                                | 2016 |
| A minimally invasive technique for lateral maxillary sinus floor elevation: a Bayesian network study                                                                                                       | Merli M.; Moscatelli M.; Mariotti G.; Pagliaro U.; Bernardelli F.; Nieri M.                                                                                      | 2016 |
| A retrospective study of esophagectomy outcomes: An institutional review                                                                                                                                   | Horst V.; Patel H.; Toulaitos J.G.                                                                                                                               | 2016 |
| Multi-center analysis of operative safety of surgery in patients with amyotrophic lateral sclerosis: The diaphragm pacing experience                                                                       | Onders R.; Carlin A.; Dunkin B.; Jossart G.; Marohn M.; Menegaux F.; Morton J.; Smith C.D.                                                                       | 2016 |
| Use of endovascular stents for management of pediatric May-Thurner syndrome: A single-center experience                                                                                                    | Goldman R.; Arendt V.; Kothary N.; Kuo W.; Sze D.; Hofmann L.; Lungren M.                                                                                        | 2016 |
| Safety, efficacy, and short-term follow-up of the use of Pipeline™ Embolization Device in small (<2.5mm) cerebral vessels for aneurysm treatment: single institution experience                            | Puri A.S.; Massari F.; Asai T.; Marosfoi M.; Kan P.; Hou S.Y.; Howk M.; Perras M.; Brooks C.; Clarencon F.; Gounis M.J.; Wakhloo A.K.                            | 2016 |
| Endovascular treatment in cerebral artery tandem lesions                                                                                                                                                   | Han J.; Li X.; He Q.; Zhao H.; Ye S.; Dong G.; Luan J.; Wang C.                                                                                                  | 2016 |
| Transcatheter mitral valve implantation for inoperable severely calcified native mitral valve disease: A systematic review                                                                                 | Puri R.; Abdul-Jawad Altisent O.; Del Trigo M.; Campelo-Parada F.; Regueiro A.; Barbosa Ribeiro H.; Delarochellière R.; Paradis J.-M.; Dumont E.; Rodés-Cabau J. | 2016 |
| Peri-implant evaluation of immediately loaded implants placed in esthetic zone in patients with diabetes mellitus type 2: a two-year study                                                                 | Aguilar-Salvatierra A.; Calvo-Guirado J.L.; González-Jaranay M.; Moreu G.; Delgado-Ruiz R.A.; Gómez-Moreno G.                                                    | 2016 |
| Histopathological Verification of Osteoimmunological Mediators in Peri-Implantitis and Correlation to Bone Loss and Implant Functional Period                                                              | Konermann A.; Götz W.; Le M.; Dirk C.; Lossdörfer S.; Heinemann F.                                                                                               | 2016 |
| Crestal bone resorption in augmented bone using mineralized freeze-dried bone allograft or pristine bone during submerged implant healing: a prospective study in humans                                   | Huang H.; Ogata Y.; Hanley J.; Finkelman M.; Hur Y.                                                                                                              | 2016 |
| A New Approach for Treating Peri-Implantitis: Reversibility of Osseointegration                                                                                                                            | Anitua E.                                                                                                                                                        | 2016 |
| Effect of Induced Periimplantitis on Dental Implants With and Without Ultrathin Hydroxyapatite Coating                                                                                                     | Madi M.; Zakaria O.; Ichinose S.; Kasugai S.                                                                                                                     | 2016 |
| Ultrasonic Assessment of Mucosal Thickness around Implants: Validity, Reproducibility, and Stability of Connective Tissue Grafts at the Buccal Aspect                                                      | Eghbali A.; De Bruyn H.; Cosyn J.; Kerckaert I.; Van Hoof T.                                                                                                     | 2016 |
| A 9-Year Prospective Case Series Using Multivariate Analyses to Identify Predictors of Early and Late Peri-Implant Bone Loss                                                                               | Vervaeke S.; Collaert B.; Cosyn J.; De Bruyn H.                                                                                                                  | 2016 |
| Short Implants Placed with or without Grafting in Atrophic Sinuses: The 3-Year Results of a Prospective Randomized Controlled Study                                                                        | Nedir R.; Nurdin N.; Khoury P.; Bischof M.                                                                                                                       | 2016 |
| Biofilm removal from implants supported restoration using different instruments: a 6-month comparative multicenter clinical study                                                                          | Blasi A.; Iorio-Siciliano V.; Pacenza C.; Pomingi F.; Matarasso S.; Rasperini G.                                                                                 | 2016 |
| Use of Lasers to Treat Failing Dental Implants                                                                                                                                                             | Cranska J.P.                                                                                                                                                     | 2016 |
| Effect of Ultraviolet Irradiation of the Implant Surface on Progression of Periimplantitis--A Pilot Study in Dogs                                                                                          | Ishii K.; Matsuo M.; Hoshi N.; Takahashi S.-S.; Kawamata R.; Kimoto K.                                                                                           | 2016 |
| Influence of placement depth and abutment connection pattern on bone remodeling around 1-stage implants: a prospective randomized controlled clinical trial                                                | Palaska I.; Tsasousoglou P.; Vouros I.; Konstantinidis A.; Menexes G.                                                                                            | 2016 |
| Dynamic locking plate vs. simple cannulated screws for nondisplaced intracapsular hip fracture: A comparative study                                                                                        | Warschawski Y.; Sharfman Z.T.; Berger O.; Steinberg E.L.; Amar E.; Snir N.                                                                                       | 2016 |
| Does exchange arthroplasty of an infected shoulder prosthesis provide better eradication rate and better functional outcome, compared to a permanent spacer or resection arthroplasty? a systematic review | George D.A.; Volpin A.; Scarponi S.; Haddad F.S.; Romanò C.L.                                                                                                    | 2016 |
| Orthopedics and biomechanics                                                                                                                                                                               |                                                                                                                                                                  |      |
| Endovascular treatment of traumatic internal carotid artery pseudoaneurysm                                                                                                                                 | Spanos K.; Karathanos C.; Stamoulis K.; Giannoukas A.D.                                                                                                          | 2016 |
| Multicenter prospective trial of intracranial stent placement in patients with symptomatic high-grade intracranial stenosis                                                                                | Gao P.; Jiao L.; Zhao Z.; Cai Y.; Li T.; Shi H.; Wu W.; He W.; Yin L.; Huang S.; Zhu F.; Wang D.; Qureshi A.I.; Ji X.; Ling F.                                   | 2016 |
| Peri-procedural heparin use in stent-retriever thrombectomy                                                                                                                                                | Haussen D.C.; Nogueira R.G.; Liebeskind D.S.; Smith W.; Lutsep H.; Jovin T.; Xiang B.                                                                            | 2016 |
| Prognosis of implant longevity in terms of annual bone loss: a methodological finite element study                                                                                                         | Demchenko V.; Linetskiy I.; Linetska L.; Nesvit V.; Shevchenko A.; Yefremov O.; Weisskircher H.-W.                                                               | 2016 |
| Differentiating success from survival in modern implantology--key considerations for case selection, predicting complications and obtaining consent                                                        | Beaumont J.; McManus G.; Darcey J.                                                                                                                               | 2016 |
| Prevalence of Peri-implantitis in Medically Compromised Patients and Smokers: A Systematic Review                                                                                                          | Turri A.; Rossetti P.H.; Canullo L.; Grusovin M.G.; Dahlin C.                                                                                                    | 2016 |

|                                                                                                                                                                                                                                                                        |                                                                                                                                 |      |
|------------------------------------------------------------------------------------------------------------------------------------------------------------------------------------------------------------------------------------------------------------------------|---------------------------------------------------------------------------------------------------------------------------------|------|
| Association between tumor necrosis factor-alpha G-308A polymorphism and dental peri-implant disease risk A meta-analysis                                                                                                                                               | Mo Y.-Y.; Zeng X.-T.; Weng H.; Cen Y.; Zhao Q.; Wen X.                                                                          | 2016 |
| Reconstruction of Peri-implant Osseous Defects: A Multicenter Randomized Trial                                                                                                                                                                                         | Jepsen K.; Jepsen S.; Laine M.L.; Anssari Moin D.; Pilloni A.; Zeza B.; Sanz M.; Ortiz-Vigon A.; Roos-Jansäker A.M.; Renvert S. | 2016 |
| Effectiveness of Implant Therapy Analyzed in a Swedish Population: Prevalence of Peri-implantitis                                                                                                                                                                      | Derks J.; Schaller D.; Håkansson J.; Wennström J.L.; Tomasi C.; Berglundh T.                                                    | 2016 |
| Prevalence of peri-implant disease on platform switching implants: a cross-sectional pilot study                                                                                                                                                                       | Duque A.D.; Aristizabal A.G.; Londoño S.; Castro L.; Alvarez L.G.                                                               | 2016 |
| Natural resistance associated macrophage protein 1 gene polymorphism is associated with chronic periodontitis not peri-implantitis in an Iranian population: A cross sectional study                                                                                   | Kadkhodazadeh M.; Ebadian A.R.; Amid R.; Zarnegarnia P.; Mollaverdi F.; Aghamohammadi N.                                        | 2016 |
| Factors influencing severity of peri-implantitis                                                                                                                                                                                                                       | Saaby M.; Karring E.; Schou S.; Isidor F.                                                                                       | 2016 |
| Accuracy of periapical radiography in assessing bone level in implants affected by peri-implantitis: a cross-sectional study                                                                                                                                           | García-García M.; Mir-Mari J.; Benic G.I.; Figueiredo R.; Valmaseda-Castellón E.                                                | 2016 |
| Peri-implantitis and diabetes mellitus                                                                                                                                                                                                                                 | Liu J.; Zhu G.-H.; Zhang E.; Sun Y.-C.                                                                                          | 2016 |
| The influence of "Conical plus octagonal" internal connection on implant survival and success rate: A retrospective study of 66 fixtures                                                                                                                               | Lopez M.A.; Andreasi Bassi M.; Confalone L.; Gaudio R.M.; Lombardo L.; Lauritano D.                                             | 2016 |
| Dental implant management and maintenance: How to improve long-term implant success?                                                                                                                                                                                   | Clark D.; Levin L.                                                                                                              | 2016 |
| Are Dental Implants a Panacea or Should We Better Strive to Save Teeth?                                                                                                                                                                                                | Giannobile W.V.; Lang N.P.                                                                                                      | 2016 |
| Peri-implant Hard and Soft Tissue Stability in Implants Placed Simultaneously Versus Delayed with Intraoral Block Bone Grafts in Horizontal Defects: A Retrospective Case Series Study                                                                                 | Aloy-Prósper A.; Peñarrocha-Oltra D.; Peñarrocha-Diogo M.; Camacho-Alonso F.; Peñarrocha-Diogo M.                               | 2016 |
| Implant-prosthetic rehabilitation after radiation treatment in head and neck cancer patients: A case-series report of outcome                                                                                                                                          | Cotic J.; Jamsek J.; Kuhar M.; Hren N.I.; Kinsky A.; Özcan M.; Jevnikar P.                                                      | 2016 |
| Six-Year Radiographic, Clinical, and Soft Tissue Outcomes of Immediately Loaded, Straight-Walled, Platform-Switched, Titanium-Alloy Implants with Nanosurface Topography                                                                                               | Glibert M.; De Bruyn H.; Östman P.-O.                                                                                           | 2016 |
| The use of lasers in the treatment of inflammatory tissue periodontal disease                                                                                                                                                                                          | Poorian B.; Dehghani N.; Chavoshinejad M.                                                                                       | 2016 |
| Evaluation of the clinical and aesthetic outcomes of Straumann® Standard Plus implants supported single crowns placed in non-augmented healed sites in the anterior maxilla: a 5-8 years retrospective study                                                           | Zhao X.; Qiao S.-C.; Shi J.-Y.; Uemura N.; Arai K.; Lai H.-C.                                                                   | 2016 |
| Immediate versus conventional loaded single implants in the posterior mandible: A meta-analysis of randomized controlled trials                                                                                                                                        | Moraschini V.; Porto Barboza E.                                                                                                 | 2016 |
| A 10-year report from a multicentre randomised controlled trial: Immediate non-occlusal versus early loading of dental implants in partially edentulous patients                                                                                                       | Zuffetti F.; Esposito M.; Galli F.; Capelli M.; Grandi G.; Testori T.                                                           | 2016 |
| Dental implants with internal versus external connections: 5-year post-loading results from a pragmatic multicenter randomised controlled trial                                                                                                                        | Esposito M.; Maghaireh H.; Pistilli R.; Grusovin M.G.; Lee S.T.; Trullenque-Eriksson A.; Gualini F.                             | 2016 |
| Factors affecting peri-implant bone resorption in four Implant supported mandibular full-arch restorations: a 3-year prospective study                                                                                                                                 | Krennmair S.; Weinländer M.; Forstner T.; Krennmair G.; Stimmelmayer M.                                                         | 2016 |
| Clinical retrospective study of self-reported penicillin allergy on dental implant failures and infections                                                                                                                                                             | French D.; Noroozi M.; Shariati B.; Larjava H.                                                                                  | 2016 |
| Effects of different dental implant systems on the peri-implant bone absorption                                                                                                                                                                                        | Zhu Y.; Wan P.-B.; Zhao W.; Wang X.-L.; Liu J.; Wei K.-K.; Liu J.-X.                                                            | 2016 |
| Regulation of osteoclasts by osteoblast lineage cells is titanium surface dependent                                                                                                                                                                                    | Lotz E.; Berger M.; Hyzy S.; Schwartz Z.; Boyan B.D.                                                                            | 2016 |
| Prevention of bacterial leakage at implant-abutment connection level: An in vitro study of the efficacy of three different implant systems                                                                                                                             | Carinci F.; Lauritano D.; Cura F.; Lopez M.A.; Andreasi Bassi M.; Confalone L.; Pezzetti F.                                     | 2016 |
| Evaluation of Implant Collar Surfaces for Marginal Bone Loss: A Systematic Review and Meta-Analysis                                                                                                                                                                    | Koodaryan R.; Hafezeqorban A.                                                                                                   | 2016 |
| Immediate loading of two (fixed-on-2) versus three (fixed-on-3) implants placed flapless supporting cross-arch fixed prostheses: One-year results from a randomised controlled trial                                                                                   | Cannizzaro G.; Loi I.; Viola P.; Ferri V.; Leone M.; Trullenque-Eriksson A.; Esposito M.                                        | 2016 |
| Alveolar Ridge Reconstruction with Titanium Meshes and Simultaneous Implant Placement: A Retrospective, Multicenter Clinical Study                                                                                                                                     | Zita Gomes R.; Paraud Freixas A.; Han C.-H.; Bechara S.; Tawil I.                                                               | 2016 |
| The effects of healing abutments of different size and anatomic shape placed immediately in extraction sockets on peri-implant hard and soft tissues. A pilot study in foxhound dogs                                                                                   | López-López P.J.; Mareque-Bueno J.; Boquete-Castro A.; Aguilar-Salvatierra Raya A.; Martínez-González J.M.; Calvo-Guirado J.L.  | 2016 |
| Immediate, immediate-delayed (6 weeks) and delayed (4 months) post-extractive single implants: 4-month post-loading data from a randomised controlled trial                                                                                                            | Felice P.; Zucchelli G.; Cannizzaro G.; Barausse C.; Diazzi M.; Trullenque-Eriksson A.; Esposito M.                             | 2016 |
| Complete Edentulous Rehabilitation Using an Immediate Function Protocol and an Implant Design Featuring a Straight Body, Anodically Oxidized Surface, and Narrow Tip with Engaging Threads Extending to the Apex of the Implant: A 5-year Retrospective Clinical Study | Maló P.; de Araújo Nobre M.; Lopes A.; Ferro A.; Gravito I.                                                                     | 2016 |
| A new micromotor allows an intraoperative assessment of bone density and primary implant stability in prosthetic rehabilitation: A case report                                                                                                                         | Greco G.B.; Kraus D.; Arosio P.; Di Stefano D.A.                                                                                | 2016 |
| Provisional Restorations Used in Immediate Implant Placement Provide a Platform to Promote Peri-implant Soft Tissue Healing: A Pilot Study                                                                                                                             | Saito H.; Chu S.J.; Reynolds M.A.; Tarnow D.P.                                                                                  | 2016 |
| Single post-extractive ultra-wide 7 mm-diameter implants versus implants placed in molar healed sites after socket preservation for molar                                                                                                                              | Tallarico M.; Khanari E.; Pisano M.; De Riu G.; Tullio A.; Meloni S.M.                                                          | 2016 |

|                                                                                                                                                                                                                    |                                                                                                                                                                                             |      |
|--------------------------------------------------------------------------------------------------------------------------------------------------------------------------------------------------------------------|---------------------------------------------------------------------------------------------------------------------------------------------------------------------------------------------|------|
| replacement: 6-month post-loading results from a randomised controlled trial                                                                                                                                       |                                                                                                                                                                                             |      |
| Te impact on bone tissues of immediate implant-supported mandibular overdentures with cusped and cusplless teeth                                                                                                   | Arafa K.A.                                                                                                                                                                                  | 2016 |
| Guided bone regeneration in distal mandibular atrophy by means of a preformed titanium foil: A case series                                                                                                         | Andreasi Bassi M.; Andrisani C.; Lopez M.A.; Gaudio R.M.; Lombardo L.; Lauritano D.                                                                                                         | 2016 |
| Marginal Bone Remodeling around healing Abutment vs Final Abutment Placement at Second Stage Implant Surgery: A 12-month Randomized Clinical Trial                                                                 | Nader N.; Aboulhosn M.; Berberi A.; Manal C.; Younes R.                                                                                                                                     | 2016 |
| Four mm-long versus longer implants in augmented bone in atrophic posterior jaws: 4-month post-loading results from a multicentre randomised controlled trial                                                      | Esposito M.; Zucchelli G.; Barausse C.; Pistilli R.; Trullenque-Eriksson A.; Felice P.                                                                                                      | 2016 |
| Performance of zirconia abutments for implant-supported single-tooth crowns in esthetic areas: a retrospective study up to 12-year follow-up                                                                       | Passos S.P.; Linke B.; Larjava H.; French D.                                                                                                                                                | 2016 |
| Effect of roughened micro-threaded implant neck and platform switching on marginal bone loss: a multicenter retrospective study with 6-year follow-up                                                              | Di Stefano D.A.; Giacometti E.; Greco G.B.; Gastaldi G.; Gherlone E.                                                                                                                        | 2016 |
| Augmentation of the alveolar ridge compared with shorter implants in atrophic jaws: A meta-analysis based on randomised controlled trials                                                                          | Yang J.; Cheng Z.; Shi B.                                                                                                                                                                   | 2016 |
| Impact of radiotherapy on implant-based prosthetic rehabilitation in patients with head and neck cancer: A prospective observational study on implant survival and quality of life—Preliminary results             | Ettl T.; Weindler J.; Gosau M.; Müller S.; Hautmann M.; Zeman F.; Koller M.; Papavasileiou D.; Bürgers R.; Driemel O.; Schneider I.; Klingelhöffer C.; Meier J.; Wahlmann U.; Reichert T.E. | 2016 |
| A 36-month follow-up prospective cohort study on peri-implant bone loss of Morse Taper connection implants with platform switching                                                                                 | Cassetta M.; Di Mambro A.; Giansanti M.; Brandetti G.; Calasso S.                                                                                                                           | 2016 |
| Timing of single implant placement and long-term observation of marginal bone levels                                                                                                                               | Schropp L.; Wenzel A.                                                                                                                                                                       | 2016 |
| Patient selection and peri-interventional management                                                                                                                                                               | Vedantham S.                                                                                                                                                                                | 2016 |
| Safety of anticoagulation with uninterrupted warfarin vs. interrupted dabigatran in patients requiring an implantable cardiac device                                                                               | Madan S.; Muthusamy P.; Mowers K.L.; Elmouchi D.A.; Finta B.; Gauri A.J.; Woelfel A.K.; Fritz T.D.; Davis A.T.; Chalfoun N.T.                                                               | 2016 |
| The obese patient a problem of larger consequence                                                                                                                                                                  | Perry K.I.; MacDonald S.J.                                                                                                                                                                  | 2016 |
| The use of CALLOS®, a calcium phosphate cement, in open reduction and internal fixation (ORIF) for Tibial plateau fractures: a comparison with non supplemented ORIF                                               | Perez-Viloria M.; De Angelis P.; Walley K.; Rodriguez E.; Appleton P.                                                                                                                       | 2016 |
| The obese patient: A problem of larger consequence                                                                                                                                                                 | Perry K.I.; MacDonald S.J.                                                                                                                                                                  | 2016 |
| Guided growth for tibia vara (Blount's disease)                                                                                                                                                                    | Heflin J.A.; Ford S.; Stevens P.                                                                                                                                                            | 2016 |
| Pyeloplasty may not be needed after laparoscopic pyelolithotomy for giant staghorn in a horseshoe kidney                                                                                                           | Chen K.; Lu J.; Tiong H.                                                                                                                                                                    | 2016 |
| Adjudicating paravalvular leaks of transcatheter aortic valves: A critical appraisal                                                                                                                               | Abdelghani M.; Soliman O.I.I.; Schultz C.; Vahanian A.; Serruys P.W.                                                                                                                        | 2016 |
| Stability of simultaneously placed dental implants with autologous bone grafts harvested from the iliac crest or intraoral jaw bone                                                                                | Kang Y.-H.; Kim H.-M.; Byun J.-H.; Kim U.-K.; Sung I.-Y.; Cho Y.-C.; Park B.-W.                                                                                                             | 2015 |
| Prevalence of Peri-implant Diseases: Analyses of Associated Factors                                                                                                                                                | Ferreira C.F.; Buttendorf A.R.; de Souza J.G.; Dalago H.; Guenther S.F.; Bianchini M.A.                                                                                                     | 2015 |
| Peri-implant complications for posterior endosteal implants                                                                                                                                                        | Esquivel-Upshaw J.; Mehler A.; Clark A.; Neal D.; Gonzaga L.; Anusavice K.                                                                                                                  | 2015 |
| Dramatic course of osteomyelitis in a patient treated with immediately placed dental implants suffering from uncontrolled diabetes: A case report                                                                  | Doll C.; Hartwig S.; Nack C.; Nahles S.; Nelson K.; Raguse J.-D.                                                                                                                            | 2015 |
| Sub-crestal positioning of implants results in higher bony crest resorption: an experimental study in dogs                                                                                                         | Cesaretti G.; Lang N.P.; Salata L.A.; Schweikert M.T.; Gutierrez Hernandez M.E.; Botticelli D.                                                                                              | 2015 |
| A History of Periodontitis Suggests a Higher Risk for Implant Loss                                                                                                                                                 | Chrcanovic B.R.                                                                                                                                                                             | 2015 |
| Immediate loading of post-extractive versus delayed placed single implants in the anterior maxilla: outcome of a pragmatic multicenter randomised controlled trial 1-year after loading                            | Esposito M.; Barausse C.; Pistilli R.; Jacotti M.; Grandi G.; Tuco L.; Felice P.                                                                                                            | 2015 |
| Immediate non-occlusal loading of immediate post-extractive versus delayed placement of single implants in preserved sockets of the anterior maxilla: 1-year post-loading outcome of a randomised controlled trial | Felice P.; Pistilli R.; Barausse C.; Trullenque-Eriksson A.; Esposito M.                                                                                                                    | 2015 |
| Malpositioned implants in the anterior maxilla: a novel restorative approach to reestablish peri-implant tissue health and acceptable esthetics. Part II: Case report and discussion                               | Moráquez O.D.; Vailati F.; Belser U.C.                                                                                                                                                      | 2015 |
| Less Invasive Surgical Procedures Using Narrow-Diameter Implants: A Prospective Study in 20 Consecutive Patients                                                                                                   | Lambert F.E.; Lecloux G.; Grenade C.; Bouhy A.; Lamy M.; Rompen E.H.                                                                                                                        | 2015 |
| Comparative Study of Immediate Functional Loading and Immediate Non-Functional Loading of Monocortical Implants                                                                                                    | Singh J.P.; Gupta A.K.; Dhiman R.K.; Roy Chowdhury S.K.                                                                                                                                     | 2015 |
| Immediately loaded machined versus rough surface dental implants in edentulous jaws: One-year postloading results of a pilot randomised controlled trial                                                           | Esposito M.; Felice P.; Barausse C.; Pistilli R.; Grandi G.; Simion M.                                                                                                                      | 2015 |
| The efficacy of BMP-2 preloaded on bone substitute or hydrogel for bone regeneration at peri-implant defects in dogs                                                                                               | Jung U.-W.; Lee I.-K.; Park J.-Y.; Thoma D.S.; Hämmerle C.H.; Jung R.E.                                                                                                                     | 2015 |
| Marginal masticatory mucosa dimensional changes in immediate post-extractive implants: a 2 year prospective cohort study                                                                                           | Ramaglia L.; Sbordone C.; Saviano R.; Martuscelli R.; Sbordone L.                                                                                                                           | 2015 |
| Short implants as an alternative to crestal sinus lift: A 1-year multicentre randomised controlled trial                                                                                                           | Felice P.; Pistilli R.; Barausse C.; Bruno V.; Trullenque-Eriksson A.; Esposito M.                                                                                                          | 2015 |

|                                                                                                                                                                                                                          |                                                                                                                                                                     |      |
|--------------------------------------------------------------------------------------------------------------------------------------------------------------------------------------------------------------------------|---------------------------------------------------------------------------------------------------------------------------------------------------------------------|------|
| Soft tissues stability of cad-cam and stock abutments in anterior regions: 2-year prospective multicentric cohort study                                                                                                  | Lops D.; Bressan E.; Parpaiola A.; Sbricoli L.; Cecchinato D.; Romeo E.                                                                                             | 2015 |
| Food Impaction and Periodontal/Peri-Implant Tissue Conditions in Relation to the Embrasure Dimensions Between Implant-Supported Fixed Dental Prostheses and Adjacent Teeth: A Cross-Sectional Study                      | Jeong J.-S.; Chang M.                                                                                                                                               | 2015 |
| Effects of Abutment Removal and Reconnection on Inflammatory Cytokine Production Around Dental Implants                                                                                                                  | Kuppasamy M.; Watanabe H.; Kasugai S.; Kuroda S.                                                                                                                    | 2015 |
| Effects of posterior ridge resorption and attachment wear on periimplant strain in mandibular two-implant-supported overdentures                                                                                         | Jo D.-W.; Dong J.-K.                                                                                                                                                | 2015 |
| Adherence of oral streptococci to nanostructured titanium surfaces                                                                                                                                                       | Narendrakumar K.; Kulkarni M.; Addison O.; Mazare A.; Junkar I.; Schmuki P.; Sammons R.; Igljč A.                                                                   | 2015 |
| High revision rate but good healing capacity of atypical femoral fractures. A comparison with common shaft fractures                                                                                                     | Schilcher J.                                                                                                                                                        | 2015 |
| Do all patients need intense anticoagulation and antiplatelet regimens following WATCHMAN device implantation? A case series of five patients                                                                            | Ramkumar S.; Tung M.; Cameron J.; Pang B.; Nerlekar N.; Kotschet E.; Alison J.                                                                                      | 2015 |
| Peri-procedural myocardial injury and long-term mortality in percutaneous coronary intervention for stable coronary artery disease                                                                                       | Goh C.; Yudi M.; Lu K.; Al-Fiadh A.; Mok M.; Clark D.; Farouque O.                                                                                                  | 2015 |
| Utility of intravascular ultrasound (IVUS) and its immediate impact on decision making on patients undergoing coronary intervention at a tertiary referral centre                                                        | Mirzaee S.; Sganzerla E.; Weerasooriya S.; Yadav R.                                                                                                                 | 2015 |
| Comparison of percutaneous device closure versus surgical closure of peri-membranous ventricular septal defects: A systematic review and meta-analysis                                                                   | Saurav A.; Kaushik M.; Mahesh Alla V.; White M.D.; Satpathy R.; Lanspa T.; Mooss A.N.; Delcore M.G.                                                                 | 2015 |
| Associations of known complications of transcatheter implantation of balloon-expandable edwards-sapien XT aortic valves with peri-procedural mortality-an insight from the 2014-2015 reports from the fda maude database | Ranjan P.; Chatterjee S.; Gupta D.; Sardar P.; Giri J.; Bhinder J.; Mukherjee D.; Correa A.; Kumbhani D.J.                                                          | 2015 |
| Trend and predictors of prolonged length of hospital stay following percutaneous coronary intervention for st elevation myocardial infarction in the United States: A 10 year perspective                                | Panchal H.B.; Veeranki S.P.; Bhatheja S.; Abusara A.; Paul T.                                                                                                       | 2015 |
| Prevalence of peri-implant inflammatory disease in patients with a history of periodontal disease who receive supportive periodontal therapy                                                                             | Aguirre-Zorzano L.A.; Estefanía-Fresco R.; Telletxea O.; Bravo M.                                                                                                   | 2015 |
| Salvaging Implants With an Nd:YAG Laser: A Novel Approach to a Growing Problem                                                                                                                                           | Suzuki J.B.                                                                                                                                                         | 2015 |
| Transglutaminase 2 May Be Associated with Peri-implant Gingival Overgrowth: Preliminary Assessments                                                                                                                      | Ceruti P.; Asioli S.; Mussano F.; Righi A.; Baldi I.; Schierano G.; Cassoni P.; Carossa S.                                                                          | 2015 |
| Soft tissue and crestal bone changes around implants with platform-switched abutments placed nonsubmerged at subcrestal position: a 2-year clinical and radiographic evaluation                                          | Aimetti M.; Ferrarotti F.; Mariani G.M.; Ghelardoni C.; Romano F.                                                                                                   | 2015 |
| Titanium-zirconium narrow-diameter versus titanium regular-diameter implants for anterior and premolar single crowns: 3-year results of a randomized controlled clinical study                                           | Ioannidis A.; Gallucci G.O.; Jung R.E.; Borzangy S.; Hämmerle C.H.; Benic G.I.                                                                                      | 2015 |
| Effect of Framework in an Implant-Supported Full-Arch Fixed Prosthesis: 3D Finite Element Analysis                                                                                                                       | Menini M.; Pesce P.; Bevilacqua M.; Pera F.; Tealdo T.; Barberis F.; Pera P.                                                                                        | 2015 |
| Reducing Fracture Risk Adjacent to a Plate with an Angulated Locked End Screw                                                                                                                                            | Peck J.B.; Charpentier P.M.; Flanagan B.P.; Srivastava A.K.; Atkinson P.J.                                                                                          | 2015 |
| Comparison of Azithromycin and Amoxicillin Before Dental Implant Placement: An Exploratory Study of Bioavailability and Resolution of Postoperative Inflammation                                                         | Escalante M.G.; Eubank T.D.; Leblebicioglu B.; Walters J.D.                                                                                                         | 2015 |
| Use of buccal fat pad to repair post-extraction peri-implant bone defects in the posterior maxilla. A preliminary prospective study                                                                                      | Peñarrocha-Diogo M.; Alonso-González R.; Aloy-Prósper A.; Peñarrocha-Oltra D.; Camacho F.; Peñarrocha-Diogo M.                                                      | 2015 |
| Dynamic locking plate vs simple cannulated screws for nondisplaced intracapsular hip fracture: A comparative study                                                                                                       | Warschawski Y.; Snir N.; Steinberg E.                                                                                                                               | 2015 |
| Prophylactic antibiotics in elective hip and knee arthroplasty: An analysis of organisms reported to cause infections and national survey of clinical practice                                                           | Hickson C.J.; Metcalfe D.; Elgohari S.; Oswald T.; Masters J.P.; Rymaszewska M.; Reed M.R.; Sprowson A.P.                                                           | 2015 |
| Evaluation in a dog model of three antimicrobial glassy coatings: Prevention of bone loss around implants and microbial assessments                                                                                      | López-Piriz R.; Solá-Linares E.; Rodriguez-Portugal M.; Malpica B.; Díaz-Güemes I.; Enciso S.; Esteban-Tejeda L.; Cabal B.; Granizo J.J.; Moya J.S.; Torrecillas R. | 2015 |
| Deep brain stimulation complicated by bilateral large cystic cavitation around the leads in a patient with Parkinson's disease                                                                                           | Jagid J.; Madhavan K.; Desai N.; Bregy A.; Desai M.; Ruiz A.; Quencer R.; Landy H.J.                                                                                | 2015 |
| 5-year outcome of consecutive left main coronary artery percutaneous coronary interventions                                                                                                                              | Piroth Z.; Ferenci T.; Fontos G.; Szonyi T.; Nemeth J.; Szoke S.; Chaurasia A.K.; Andreka P.                                                                        | 2015 |
| Endoscopic Transpapillary Gallbladder Stent Placement Is Safe and Effective in High-Risk Patients Without Cirrhosis                                                                                                      | McCarthy S.T.; Tujios S.; Fontana R.J.; Rahnama-Moghadam S.; Elmunzer B.J.; Kwon R.S.; Wamsteker E.J.; Anderson M.A.; Scheiman J.M.; Elta G.H.; Piraka C.R.         | 2015 |
| Efficacy of air polishing for the non-surgical treatment of peri-implant diseases: a systematic review                                                                                                                   | Schwarz F.; Becker K.; Renvert S.                                                                                                                                   | 2015 |
| 10-year survival rate and the incidence of peri-implant disease of 374 titanium dental implants with a SLA surface: a prospective cohort study in 177 fully and partially edentulous patients                            | van Velzen F.J.; Ofec R.; Schulten E.A.; Ten Bruggenkate C.M.                                                                                                       | 2015 |
| Twelve-Year Retrospective Follow-Up of Machined Implants in the Posterior Maxilla: Radiographic and Peri-Implant Outcome                                                                                                 | Simion M.; Gionso L.; Grossi G.B.; Briguglio F.; Fontana F.                                                                                                         | 2015 |
| Experimental Peri-Implantitis around Different Types of Implants - A Clinical and Radiographic Study in Dogs                                                                                                             | Fickl S.; Keschull M.; Calvo-Guirado J.L.; Hürzeler M.; Zuh O.                                                                                                      | 2015 |

|                                                                                                                                                                                    |                                                                                                                                                                                      |      |
|------------------------------------------------------------------------------------------------------------------------------------------------------------------------------------|--------------------------------------------------------------------------------------------------------------------------------------------------------------------------------------|------|
| Peri-Implantitis Associated with Type of Cement: A Retrospective Analysis of Different Types of Cement and Their Clinical Correlation to the Peri-Implant Tissue                   | Korsch M.; Walther W.                                                                                                                                                                | 2015 |
| Implant in vascularized fibula graft reconstructed for segment mandibular defect                                                                                                   | Wu Y.; Yao J.; Shi W.; Yang X.; Ding X.; Song X.                                                                                                                                     | 2015 |
| A comparative study for the long-term stability of simultaneously placed dental implants with autologous bone graft harvested from iliac crest and maxillomandibular bone          | Kang Y.; Byun J.; Kim H.; Park B.                                                                                                                                                    | 2015 |
| Peri-Implant Response and Microflora in Organ Transplant Patients 1 Year after Prosthetic Loading: A Prospective Controlled Study                                                  | Montebugnoli L.; Venturi M.; Cervellati F.; Servidio D.; Vocale C.; Pagan F.; Landini M.P.; Magnani G.; Sambri V.                                                                    | 2015 |
| Long-Term Retrospective Clinical and Radiographic Follow-up of 205 Brånemark System Mk III TiUnit Implants Submitted to Either Immediate or Delayed Loading                        | Imburgia M.; Del Fabbro M.                                                                                                                                                           | 2015 |
| Clinical and Radiographic Evaluation of Marginal Bone Changes around Platform-Switching Implants Placed in Crestal or Subcrestal Positions: A Randomized Controlled Clinical Trial | Kütan E.; Bolukbasi N.; Yildirim-Ondur E.; Ozdemir T.                                                                                                                                | 2015 |
| Effect of Platform Shift/Switch and Concave Abutments on Crestal Bone Levels and Mucosal Profile following Flap and Flapless Implant Surgery                                       | Gamborena I.; Lee J.; Fiorini T.; Wenzel B.A.; Schüpbach P.; Wikesjö U.M.; Susin C.                                                                                                  | 2015 |
| Increasing the Width of Keratinized Mucosa in Maxillary Implant Areas Using a Split Palatal Bridge Flap: Surgical Technique and 1-Year Follow-Up                                   | Frisch E.; Ratka-Krüger P.; Ziebolz D.                                                                                                                                               | 2015 |
| A Comparison of Zirconia and Titanium Abutments for Microleakage                                                                                                                   | Abdelhamed M.I.; Galley J.D.; Bailey M.T.; Johnston W.M.; Holloway J.; McGlumphy E.; Leblebicioglu B.                                                                                | 2015 |
| Early Periimplant Tissue Healing on 1-Piece Implants With a Concave Transmucosal Design: A Histomorphometric Study in Dogs                                                         | Bolle C.; Gustin M.-P.; Fau D.; Exbrayat P.; Boivin G.; Grosogeat B.                                                                                                                 | 2015 |
| Retrospective analysis of 26 complete-arch implant-supported monolithic zirconia prostheses with feldspathic porcelain veneering limited to the facial surface                     | Venezia P.; Torsello F.; Cavalcanti R.; D'Amato S.                                                                                                                                   | 2015 |
| Four-Millimeter-Long Posterior-Mandible Implants: 5-Year Outcomes of a Prospective Multicenter Study                                                                               | Slotte C.; Grønningsaeter A.; Halmøy A.-M.; Öhrnell L.-O.; Mordenfeld A.; Isaksson S.; Johansson L.                                                                                  | 2015 |
| Determination of implant length in maxillary anterior region                                                                                                                       | Ebenezer V.; Balakrishnan R.; Muthumani T.; Prakash D.                                                                                                                               | 2015 |
| Restoration of Oral Function for Adult Edentulous Patients with Ectodermal Dysplasia: A Prospective Preliminary Clinical Study                                                     | Wu Y.; Wang X.D.; Wang F.; Huang W.; Zhang Z.; Zhang Z.; Kaigler D.; Zou D.                                                                                                          | 2015 |
| A Clinical Study Evaluating Changes in the Microbial Flora Around Dental Implants During Various Stages of Implant Restoration                                                     | Herekar M.; Sethi M.; Prithviraj D.R.; Bhat K.; Fernandes A.; Patil V.                                                                                                               | 2015 |
| Can Periimplantitis Be Treated?                                                                                                                                                    | Fu J.-H.; Wang H.-L.                                                                                                                                                                 | 2015 |
| Single-Tooth Rehabilitations Supported by Dental Implants Used in an Immediate-Provisionalization Protocol: Report on Long-Term Outcome with Retrospective Follow-Up               | Maló P.; de Araújo Nobre M.; Lopes A.; Ferro A.; Gravito I.                                                                                                                          | 2015 |
| IL1RN gene polymorphism in a Portuguese population with implant-supported overdentures - An observational study                                                                    | Sampaio-Fernandes M.; Vaz P.C.; Braga A.C.; Figueiral M.H.                                                                                                                           | 2015 |
| The NobelGuide® All-on-4® Treatment Concept for Rehabilitation of Edentulous Jaws: A Prospective Report on Medium- and Long-Term Outcomes                                          | Lopes A.; Maló P.; de Araújo Nobre M.; Sanchez-Fernández E.                                                                                                                          | 2015 |
| Usefulness of laser in oral and maxillofacial surgery                                                                                                                              | Lal K.; Parthiban J.; Sargunar B.; Prakash C.A.; Anandh B.                                                                                                                           | 2015 |
| Role of horizontal gap on the success of immediate implant                                                                                                                         | Ghanem W.A.                                                                                                                                                                          | 2015 |
| Blood transfusion and anaemia in patients undergoing posterior lumbar interbody fusion                                                                                             | Lalabekyan B.; Moss C.; Luoma A.                                                                                                                                                     | 2015 |
| Management challenges of congenital & early onset childhood hearing loss in a sub-Saharan African country                                                                          | Adedeji T.O.; Tobih J.E.; Sogebi O.A.; Daniel A.D.                                                                                                                                   | 2015 |
| Intrathoracic impedance monitoring for heart failure                                                                                                                               | Khosla A.; Shanahan C.; Scatena R.                                                                                                                                                   | 2015 |
| Anterior lumbar interbody fusion with integrated fixation and adjunctive posterior stabilization: A comparative biomechanical analysis                                             | Yeager M.S.; Dupre D.A.; Cook D.J.; Oh M.Y.; Altman D.T.; Cheng B.C.                                                                                                                 | 2015 |
| Outcomes of percutaneous transhepatic cholangiography for the relief of malignant jaundice in England between 2001 and 2014                                                        | Rees J.; Trudgill N.; Evison F.; Mytton J.; Patel P.                                                                                                                                 | 2015 |
| Metastatic breast cancer in medication-related osteonecrosis around mandibular implants                                                                                            | Favia G.; Tempesta A.; Limongelli L.; Crincoli V.; Piattelli A.; Maiorano E.                                                                                                         | 2015 |
| Transcatheter aortic valve implantation - update and evidence                                                                                                                      | Van Linden A.; Doss M.; Arsalan M.; Kim W.K.; Walther T.                                                                                                                             | 2015 |
| Peri-implant evaluation in type 2 diabetes mellitus patients: a 3-year study                                                                                                       | Gómez-Moreno G.; Aguilar-Salvatierra A.; Rubio Roldán J.; Guardia J.; Gargallo J.; Calvo-Guirado J.L.                                                                                | 2015 |
| Preventing and Treating Peri-Implantitis: A Cost-Effectiveness Analysis                                                                                                            | Schwendicke F.; Tu Y.-K.; Stolpe M.                                                                                                                                                  | 2015 |
| The patient undergoing implant therapy. Summary and consensus statements. The 4th EAO Consensus Conference 2015                                                                    | Klinge B.; Flemming T.; Cosyn J.; De Bruyn H.; Eisner B.M.; Hultin M.; Isidor F.; Lang N.P.; Lund B.; Meyle J.; Mombelli A.; Navarro J.M.; Pjetursson B.; Renvert S.; Schliephake H. | 2015 |
| Implants failures related to endodontic treatment. An observational retrospective study                                                                                            | López-Martínez F.; Gómez Moreno G.; Olivares-Ponce P.; Eduardo Jaramillo D.; Eduardo Maté Sánchez de Val J.; Calvo-Guirado J.L.                                                      | 2015 |
| Technical and biological complications of single-molar implant restorations                                                                                                        | Rinke S.; Roediger M.; Eickholz P.; Lange K.; Ziebolz D.                                                                                                                             | 2015 |
| Prevalence and Possible Risk Factors of Peri-implantitis: A Concept Review                                                                                                         | Marcantonio C.; Nicoli L.G.; Marcantonio Junior E.; Zandim-Barcelos D.L.                                                                                                             | 2015 |



|                                                                                                                                                                                                                 |                                                                                                                       |      |
|-----------------------------------------------------------------------------------------------------------------------------------------------------------------------------------------------------------------|-----------------------------------------------------------------------------------------------------------------------|------|
| Risk indicators for peri-implantitis. A narrative review                                                                                                                                                        | Renvert S.; Quirynen M.                                                                                               | 2015 |
| Characterization of Cement Particles Found in Peri-implantitis-Affected Human Biopsy Specimens                                                                                                                  | Burbano M.; Wilson T.G.; Valderrama P.; Blansett J.; Wadhvani C.P.; Choudhary P.K.; Rodriguez L.C.; Rodrigues D.C.    | 2015 |
| Peri-implantitis Treatment with a Regenerative Approach: Clinical Outcomes on Reentry                                                                                                                           | Parma-Benfenati S.; Roncati M.; Galletti P.; Tinti C.                                                                 | 2015 |
| Peri-implant mucosal recession: Clinical significance and therapeutic opportunities                                                                                                                             | Fickl S.                                                                                                              | 2015 |
| Change in the Gingival Margin Profile After the Single Flap Approach in Periodontal Intraosseous Defects                                                                                                        | Farina R.; Simonelli A.; Minenna L.; Rasperini G.; Schincaglia G.P.; Tomasi C.; Trombelli L.                          | 2015 |
| The effect of zirconia or titanium as abutment material on soft peri-implant tissues: a systematic review and meta-analysis                                                                                     | Linkevicius T.; Vaitelis J.                                                                                           | 2015 |
| Unsplinted implants and teeth supporting maxillary removable partial dentures retained by telescopic crowns: a retrospective study with >6 years of follow-up                                                   | Frisch E.; Ratka-Krüger P.; Wenz H.-J.                                                                                | 2015 |
| Posterior jaws rehabilitated with partial prostheses supported by 4.0 x 4.0 mm or by longer implants: Four-month post-loading data from a randomised controlled trial                                           | Esposito M.; Barausse C.; Pistilli R.; Checchi V.; Diazi M.; Gatto M.R.; Felice P.                                    | 2015 |
| Short implants versus bone augmentation for placing longer implants in atrophic maxillae: One-year post-loading results of a pilot randomised controlled trial                                                  | Esposito M.; Barausse C.; Pistilli R.; Sammartino G.; Grandi G.; Felice P.                                            | 2015 |
| Evaluation of Clinical Parameters and Levels of Proinflammatory Cytokines in the Crevicular Fluid Around Dental Implants in Patients with Type 2 Diabetes Mellitus                                              | Dögan Ş.B.; Kurtiş M.B.; Tüter G.; Serdar M.; Watanabe K.; Karakış S.                                                 | 2015 |
| Safety and effectiveness of early loaded maxillary titanium implants with a novel nanostructured calcium-incorporated surface (Xpeed): 3-year results from a pilot multicenter randomised controlled trial      | Felice P.; Grusovin M.G.; Barausse C.; Grandi G.; Esposito M.                                                         | 2015 |
| Implant site preparation using a single bur versus multiple drilling steps: 4-month post-loading results of a multicenter randomised controlled trial                                                           | Guazzi P.; Grandi T.; Grandi G.                                                                                       | 2015 |
| Marginal bone and soft tissue behavior following platform switching abutment connection/disconnection--a dog model study                                                                                        | Alves C.C.; Muñoz F.; Cantalapiedra A.; Ramos I.; Neves M.; Blanco J.                                                 | 2015 |
| Comparing membranes and bone substitutes in a one-stage procedure for horizontal bone augmentation. A double-blind randomised controlled trial                                                                  | Merli M.; Moscatelli M.; Mariotti G.; Pagliaro U.; Raffaelli E.; Nieri M.                                             | 2015 |
| The Concept of Platform Switching to Preserve Peri-implant Bone Level: Assessment of Methodologic Quality of Systematic Reviews                                                                                 | Monje A.; Pommer B.                                                                                                   | 2015 |
| Crestal bone loss and periimplant inflammatory parameters around zirconia implants: A systematic review                                                                                                         | Vohra F.; Al-Kheraif A.A.; Ab Ghani S.M.; Abu Hassan M.I.; Alnassar T.; Javed F.                                      | 2015 |
| Factors affecting peri-implant bone loss: a post-five-year retrospective study                                                                                                                                  | Vázquez Álvarez R.; Pérez Sayáns M.; Gayoso Diz P.; García García A.                                                  | 2015 |
| Bone and Calcium Metabolisms Associated with Dental and Oral-Maxillofacial Diseases. Destructive bone resorption by osteoclasts and oral disease                                                                | Nakamura M.; Koide M.; Nakamura H.; Udagawa N.                                                                        | 2015 |
| Associated lumbar scoliosis does not affect outcomes in patients undergoing focal minimally invasive transforaminal lumbar interbody fusion (MISTLIF) for neurogenic symptoms: A minimum 2-year follow-up study | Bassi A.; Tay K.S.; Yeo W.; Yue W.M.                                                                                  | 2015 |
| Ligature-induced peri-implantitis in mice                                                                                                                                                                       | Pirih F.Q.; Hiyari S.; Barroso A.D.; Jorge A.C.; Perussolo J.; Atti E.; Tetradis S.; Camargo P.M.                     | 2015 |
| Maintenance therapy in patients following the surgical treatment of peri-implantitis: a 5-year follow-up study                                                                                                  | Serino G.; Turri A.; Lang N.P.                                                                                        | 2015 |
| Assessment of periodontal and opportunistic flora in patients with peri-implantitis                                                                                                                             | Albertini M.; López-Cerero L.; O'Sullivan M.G.; Chereguini C.F.; Ballesta S.; Ríos V.; Herrero-Climent M.; Bullón P.  | 2015 |
| A Prognosis System for Periimplant Diseases                                                                                                                                                                     | Decker A.M.; Sheridan R.; Lin G.-H.; Sutthiboonyapan P.; Carroll W.; Wang H.-L.                                       | 2015 |
| Changes of Marginal Bone Level in Patients with "Progressive Bone Loss" at Brånemark System® Implants: A Radiographic Follow-Up Study over an Average of 9 Years                                                | Jemt T.; Sundén Pikner S.; Gröndahl K.                                                                                | 2015 |
| Long-Term (9-12 Years) Outcomes of Titanium Implants With an Oxidized Surface: A Retrospective Investigation on 209 Implants                                                                                    | Mozzati M.; Gallesio G.; Del Fabbro M.                                                                                | 2015 |
| Medium- and Long-Term Complications in Full-Arch Rehabilitations Supported by Upright and Tilted Implants                                                                                                       | Francetti L.; Corbella S.; Taschieri S.; Cavalli N.; Del Fabbro M.                                                    | 2015 |
| Immediate loading short implants inserted on low bone quantity for the rehabilitation of the edentulous maxilla using an All-on-4 design                                                                        | Maló P.; de Araújo Nobre M.A.; Lopes A.V.; Rodrigues R.                                                               | 2015 |
| Association of Keratinized Mucosa and Periimplant Soft Tissue Stability Around Implants With Platform Switching                                                                                                 | Romanos G.; Grizas E.; Nentwig G.-H.                                                                                  | 2015 |
| Evaluation of Hi-Tec implant restoration in mandibular first molar region- A prospective clinical study                                                                                                         | Sreeram R.R.S.; Krishna Prasad L.; Chakravarthi P.S.; Devi N.N.; Kattimani V.S.; Sreeram S.K.                         | 2015 |
| Lasers in Implant Dentistry, Part 2                                                                                                                                                                             | van As G.A.                                                                                                           | 2015 |
| The Effect of Parathyroid Hormone on Osseointegration in Insulin-Treated Diabetic Rats                                                                                                                          | Rybaczek T.; Tangl S.; Dobsak T.; Gruber R.; Kuchler U.                                                               | 2015 |
| Impact of optical coherence tomography findings during percutaneous coronary intervention on 9-month follow-up outcomes                                                                                         | Sugiyama T.; Kimura S.; Yamakami Y.; Kojima K.; Sagawa Y.; Ohtani H.; Hishikari K.; Hikita H.; Takahashi A.; Isobe M. | 2015 |
| Microbiologic and Clinical Findings of Implants in Healthy Condition and with Peri-Implantitis                                                                                                                  | Canullo L.; Peñarrocha-Oltra D.; Covani U.; Rossetti P.H.                                                             | 2015 |
| Significance of the width of keratinized mucosa on peri-implant health                                                                                                                                          | Chiu Y.-W.; Lee S.-Y.; Lin Y.-C.; Lai Y.-L.                                                                           | 2015 |

|                                                                                                                                                                                          |                                                                                                                                                                                                    |      |
|------------------------------------------------------------------------------------------------------------------------------------------------------------------------------------------|----------------------------------------------------------------------------------------------------------------------------------------------------------------------------------------------------|------|
| Maintenance and Monitoring of Dental Implants in General Dental Practice                                                                                                                 | Tarawali K.                                                                                                                                                                                        | 2015 |
| What Are the Implications of Peri-Implantitis?                                                                                                                                           | Nevins M.                                                                                                                                                                                          | 2015 |
| Buccal bone deficiency in fresh extraction sockets: a prospective single cohort study                                                                                                    | Barone A.; Ricci M.; Romanos G.E.; Tonelli P.; Alfonsi F.; Covani U.                                                                                                                               | 2015 |
| The Effect of Interimplant Distance on Peri-implant Bone and Soft Tissue Dimensional Changes: A Nonrandomized, Prospective, 2-Year Follow-up Study                                       | Koutouzis T.; Neiva R.; Lipton D.; Lundgren T.                                                                                                                                                     | 2015 |
| Clinical Outcome of Double Crown-Retained Mandibular Removable Dentures Supported by a Combination of Residual Teeth and Strategic Implants                                              | Rinke S.; Ziebolz D.; Ratka-Krüger P.; Frisch E.                                                                                                                                                   | 2015 |
| Influence of collar design on peri-implant tissue healing around immediate implants: A pilot study in Foxhound dogs                                                                      | Calvo-Guirado J.L.; López-López P.J.; Maté Sánchez de Val J.E.; Mareque-Bueno J.; Delgado-Ruiz R.A.; Romanos G.E.                                                                                  | 2015 |
| An Up-to-15-Year Comparison of the Survival and Complication Burden of Three-Unit Tooth-Supported Fixed Dental Prostheses and Implant-Supported Single Crowns                            | Walton T.R.                                                                                                                                                                                        | 2015 |
| Biological width formation to immediate implants placed at different level in relation to the crestal bone: an experimental study in dogs                                                | Negri B.; López Mari M.; Maté Sánchez de Val J.E.; Iezzi G.; Bravo González L.A.; Calvo Guirado J.L.                                                                                               | 2015 |
| Marginal bone loss evaluation around immediate non-occlusal microthreaded implants placed in fresh extraction sockets in the maxilla: a 3-year study                                     | Calvo-Guirado J.L.; Gómez-Moreno G.; Aguilar-Salvatierra A.; Guardia J.; Delgado-Ruiz R.A.; Romanos G.E.                                                                                           | 2015 |
| The influence of the connection, length and diameter of an implant on bone biomechanics                                                                                                  | Borie E.; Orsi I.A.; de Araujo C.P.                                                                                                                                                                | 2015 |
| Narrow- versus mini-implants at crestal and subcrestal bone levels. Experimental study in beagle dogs at three months                                                                    | Calvo-Guirado J.L.; Pérez-Albacete C.; Aguilar-Salvatierra A.; de Val Maté-Sánchez J.E.; Delgado-Ruiz R.A.; Abboud M.; Velasco E.; Gómez-Moreno G.; Romanos G.E.                                   | 2015 |
| Implant-Supported Telescopic Crown-Retained Overdentures for Oral Rehabilitation of Patients with Severe Bony Defects: A 5-Year Retrospective Study                                      | Zou D.; Wang F.; Wu Y.; Huang W.; Zhang C.; Zhang Z.                                                                                                                                               | 2015 |
| Particle characterisation and cytokine expression in failed small-diameter metal-on-metal total hip arthroplasties                                                                       | Singh G.; Nuechtern J.V.; Meyer H.; Fiedler G.M.; Awiszus F.; Junk-Jantsch S.; Bruegel M.; Pflueger G.; Lohmann C.H.                                                                               | 2015 |
| An audit of the roll out of the health service executive's national bone anchored hearing aid programme in the south infirmary Victoria university hospital                              | O'Leary J.; O'Sullivan P.                                                                                                                                                                          | 2015 |
| An exploratory study to investigate if patients are able to aid the early diagnosis of peri-implant complications                                                                        | Wright S.; Archer C.                                                                                                                                                                               | 2015 |
| Animal models for peri-implant mucositis and peri-implantitis                                                                                                                            | Schwarz F.; Sculean A.; Engebretson S.P.; Becker J.; Sager M.                                                                                                                                      | 2015 |
| Clinical approaches to treat peri-implant mucositis and peri-implantitis                                                                                                                 | Renvert S.; Polyzois I.N.                                                                                                                                                                          | 2015 |
| Soft and Hard Tissue Response to Zirconia versus Titanium One-Piece Implants Placed in Alveolar and Palatal Sites: A Randomized Control Trial                                            | Siddiqi A.; Kieser J.A.; De Silva R.K.; Thomson W.M.; Duncan W.J.                                                                                                                                  | 2015 |
| Soft tissue grafting to improve the attached mucosa at dental implants: A review of the literature and proposal of a decision tree                                                       | Basseti M.; Kaufmann R.; Salvi G.E.; Sculean A.; Basseti R.                                                                                                                                        | 2015 |
| Risk factors of peri-implant pathology                                                                                                                                                   | de Araújo Nobre M.; Mano Azul A.; Rocha E.; Maló P.                                                                                                                                                | 2015 |
| Modified implant surface with slower and less initial biofilm formation                                                                                                                  | John G.; Becker J.; Schwarz F.                                                                                                                                                                     | 2015 |
| Dimensions of the healthy gingiva and peri-implant mucosa                                                                                                                                | Parpaola A.; Cecchinato D.; Toia M.; Bressan E.; Speroni S.; Lindhe J.                                                                                                                             | 2015 |
| Survival of implants in immediate extraction sockets of anterior teeth: Early clinical results                                                                                           | Sabir M.; Alam M.N.                                                                                                                                                                                | 2015 |
| Immediate, early (3 weeks) and conventional loading (4 months) of single implants: Preliminary data at 1 year after loading from a pragmatic multicenter randomised controlled trial     | Grandi T.; Guazzi P.; Samarani R.; Tohme H.; Khoury S.; Sbricoli L.; Grandi G.; Esposito M.                                                                                                        | 2015 |
| Do repeated changes of abutments have any influence on the stability of peri-implant tissues? Four-month post-loading preliminary results from a multicentre randomised controlled trial | Luongo G.; Bressan E.; Grusovin M.G.; d'Avenia F.; Neumann K.; Sbricoli L.; Esposito M.                                                                                                            | 2015 |
| Periodontal and peri-implant wound healing following laser therapy                                                                                                                       | Aoki A.; Mizutani K.; Schwarz F.; Sculean A.; Yukna R.A.; Takasaki A.A.; Romanos G.E.; Taniguchi Y.; Sasaki K.M.; Zeredo J.L.; Koshy G.; Coluzzi D.J.; White J.M.; Abiko Y.; Ishikawa I.; Izumi Y. | 2015 |
| Laser Therapy is Safe but not Superior to Conventional Treatment of Peri-implantitis                                                                                                     | Romanos G.E.; Javed F.                                                                                                                                                                             | 2015 |
| Plaque score change as an indicator for periimplant health in periodontal patients with immediately restored dental implants                                                             | Gabay E.; Levin L.; Zuabi O.; Horwitz J.                                                                                                                                                           | 2015 |
| Raloxifene enhances peri-implant bone healing in osteoporotic rats                                                                                                                       | Ramalho-Ferreira G.; Faverani L.P.; Prado F.B.; Garcia I.R.; Okamoto R.                                                                                                                            | 2015 |
| Peri-implant bone response following immediate implants placed in the esthetic zone and with immediate provisionalization--a case series study                                           | Martin C.; Thomé G.; Melo A.C.; Fontão F.N.                                                                                                                                                        | 2015 |
| Chlorhexidine anaphylaxis: The hidden trigger                                                                                                                                            | Pettipher A.; Duggleby P.                                                                                                                                                                          | 2015 |
| Distal femoral fractures: The need to review the standard of care                                                                                                                        | Smith J.R.A.; Halliday R.; Aquilina A.L.; Morrison R.J.M.; Yip G.C.K.; McArthur J.; Hull P.; Gray A.; Kelly M.B.                                                                                   | 2015 |
| Perioperative behavioral therapy & pelvic muscle strengthening does not improve quality of life after apical prolapse surgery: A randomized controlled trial                             | Weidner A.C.; Barber M.D.; Markland A.D.; Rahn D.D.; Hsu Y.; Mueller E.R.; Jakuswaldman S.; Dyer K.Y.; Warren L.K.; Gantz M.; Meikle S.                                                            | 2015 |

|                                                                                                                                                                                                                                                                                                               |                                                                                                                                                                                                                                                                               |      |
|---------------------------------------------------------------------------------------------------------------------------------------------------------------------------------------------------------------------------------------------------------------------------------------------------------------|-------------------------------------------------------------------------------------------------------------------------------------------------------------------------------------------------------------------------------------------------------------------------------|------|
| Interventions for replacing missing teeth: Alveolar ridge preservation techniques for dental implant site development                                                                                                                                                                                         | Atieh M.A.; Alsabeeha N.H.; Payne A.G.; Duncan W.; Faggion C.M.; Esposito M.                                                                                                                                                                                                  | 2015 |
| Cost-effectiveness of non-surgical peri-implantitis treatments                                                                                                                                                                                                                                                | Listl S.; Frühauf N.; Dannewitz B.; Weis C.; Tu Y.-K.; Chang H.-J.; Faggion C.M.                                                                                                                                                                                              | 2015 |
| Unintentional root fragment retention in proximity to dental implants: a series of six human case reports                                                                                                                                                                                                     | Langer L.; Langer B.; Salem D.                                                                                                                                                                                                                                                | 2015 |
| Minimally invasive extraction and flapless immediate implant placement with no bone substitute: A 1 year retrospective analysis                                                                                                                                                                               | Li H.; Kong X.; Chen J.; Chen X.; Zhang Z.; Cao W.; Ge Y.; Fang S.                                                                                                                                                                                                            | 2015 |
| Hard and soft tissue surgical complications in dental implantology                                                                                                                                                                                                                                            | Aziz S.R.                                                                                                                                                                                                                                                                     | 2015 |
| A multicenter randomized comparative trial of implants with different abutment interfaces to replace anterior maxillary single teeth                                                                                                                                                                          | Cooper L.F.; Reside G.; Stanford C.; Barwacz C.; Feine J.; Abi Nader S.; Scheyer E.T.; McGuire M.                                                                                                                                                                             | 2015 |
| Treatment of Peri-implant Bone Defects with Platelet-Rich Fibrin                                                                                                                                                                                                                                              | Hamzacebi B.; Oduncuoglu B.; Alaaddinoglu E.E.                                                                                                                                                                                                                                | 2015 |
| Implant angulation: 2-year retrospective analysis on the influence of dental implant angle insertion on marginal bone resorption in maxillary and mandibular osseous onlay grafts                                                                                                                             | Ramaglia L.; Toti P.; Sbordonc C.; Guidetti F.; Martuscelli R.; Sbordonc L.                                                                                                                                                                                                   | 2015 |
| Fate of the buccal bone at implants placed early, delayed, or late after tooth extraction analyzed by cone beam CT: 10-year results from a randomized, controlled, clinical study                                                                                                                             | Schropp L.; Wenzel A.; Spin-Neto R.; Stavropoulos A.                                                                                                                                                                                                                          | 2015 |
| FGDP(UK) Divisional Update: Contemporary Periodontal and Peri-implant Management                                                                                                                                                                                                                              | Lane N.                                                                                                                                                                                                                                                                       | 2015 |
| Key nurse-sensitive outcomes in post-transcatheter aortic valve implantation (TAVI) procedure recovery                                                                                                                                                                                                        | Johnston R.                                                                                                                                                                                                                                                                   | 2015 |
| Prospective trial of intracranial stent placement in patients with symptomatic high-grade intracranial stenosis (70-99%)                                                                                                                                                                                      | Gao P.; Jiao L.; Zhao Z.; Cai Y.; Li T.; Shi H.; Wu W.; He W.; Yin L.; Huang S.; Wang D.                                                                                                                                                                                      | 2015 |
| Filter particle analysis correlates intracerebral microembolization risk during angioplasty and stenting of vulnerable carotid plaque                                                                                                                                                                         | Li J.; Mani V.; Giannarelli C.; Gordon E.; Krishnan P.; Tadros R.; Fayad Z.; Faries P.; Wiley J.                                                                                                                                                                              | 2015 |
| Novel applications for lumen apposing metal stents: How far can WE go?                                                                                                                                                                                                                                        | Sharaiha R.Z.; Tyberg A.; Desai A.P.; Benias P.C.; Kumbhari V.; Dimaio C.J.; Sejpal D.V.; Sethi A.; Ho S.; Tieu A.H.; Gaidhane M.; Khashab M.; Carr-Locke D.L.; Kahaleh M.                                                                                                    | 2015 |
| Hip abductor strength association with functional performance of patients after unilateral total knee arthroplasty: A longitudinal study                                                                                                                                                                      | Chan A.C.M.; Yung B.P.K.; Tsui A.S.K.; Kwok A.C.F.; Tong J.M.C.                                                                                                                                                                                                               | 2015 |
| Clinical, microbiological, and immunological aspects of healthy versus peri-implantitis tissue in full arch reconstruction patients: a prospective cross-sectional study                                                                                                                                      | Ata-Ali J.; Flichy-Fernández A.J.; Alegre-Domingo T.; Ata-Ali F.; Palacio J.; Peñarrocha-Diogo M.                                                                                                                                                                             | 2015 |
| Primary prevention of peri-implantitis: managing peri-implant mucositis                                                                                                                                                                                                                                       | Jepsen S.; Berglundh T.; Genco R.; Aass A.M.; Demirel K.; Derks J.; Figuero E.; Giovannoli J.L.; Goldstein M.; Lambert F.; Ortiz-Vigon A.; Polyzois I.; Salvi G.E.; Schwarz F.; Serino G.; Tomasi C.; Zitzmann N.U.                                                           | 2015 |
| Treatment of peri-implantitis and the failing implant                                                                                                                                                                                                                                                         | Robertson K.; Shahbazian T.; MacLeod S.                                                                                                                                                                                                                                       | 2015 |
| Marginal bone loss as success criterion in implant dentistry: beyond 2 mm                                                                                                                                                                                                                                     | Galindo-Moreno P.; León-Cano A.; Ortega-Oller I.; Monje A.; O'Valle F.; Catena A.                                                                                                                                                                                             | 2015 |
| Primary and secondary prevention of periodontal and peri-implant diseases: Introduction to, and objectives of the 11th European Workshop on Periodontology consensus conference                                                                                                                               | Tonetti M.S.; Chapple I.L.; Jepsen S.; Sanz M.                                                                                                                                                                                                                                | 2015 |
| Risk indicators for peri-implant mucositis: a systematic literature review                                                                                                                                                                                                                                    | Renvert S.; Polyzois I.                                                                                                                                                                                                                                                       | 2015 |
| Effect of different prosthetic abutments on peri-implant soft tissue. A randomized controlled clinical trial                                                                                                                                                                                                  | Ferrari M.; Cagidiaco M.C.; Garcia-Godoy F.; Goracci C.; Cairo F.                                                                                                                                                                                                             | 2015 |
| Dental implants are a viable alternative for compensating oligodontia in adolescents                                                                                                                                                                                                                          | Heuberger S.; Dvorak G.; Mayer C.; Watzek G.; Zechner W.                                                                                                                                                                                                                      | 2015 |
| Effect of Platelet Rich Fibrin (PRF) on peri-implant soft tissue and crestal bone in one-stage implant placement: A randomized controlled trial                                                                                                                                                               | Boora P.; Rathee M.; Bhorla M.                                                                                                                                                                                                                                                | 2015 |
| Photodynamic therapy and periodontal treatment                                                                                                                                                                                                                                                                | Gümü P.; Buduneli N.                                                                                                                                                                                                                                                          | 2015 |
| Effect of professional mechanical plaque removal on secondary prevention of periodontitis and the complications of gingival and periodontal preventive measures: consensus report of group 4 of the 11th European Workshop on Periodontology on effective prevention of periodontal and peri-implant diseases | Sanz M.; Bäumer A.; Buduneli N.; Dommisch H.; Farina R.; Kononen E.; Linden G.; Meyle J.; Preshaw P.M.; Quirynen M.; Roldan S.; Sanchez N.; Sculean A.; Slot D.E.; Trombelli L.; West N.; Winkel E.                                                                           | 2015 |
| Principles in prevention of periodontal diseases: Consensus report of group 1 of the 11th European Workshop on Periodontology on effective prevention of periodontal and peri-implant diseases                                                                                                                | Tonetti M.S.; Eickholz P.; Loos B.G.; Papapanou P.; van der Velden U.; Armitage G.; Bouchard P.; Deinzer R.; Dietrich T.; Hughes F.; Kocher T.; Lang N.P.; Lopez R.; Needleman I.; Newton T.; Nibali L.; Pretzl B.; Ramseier C.; Sanz-Sanchez I.; Schlagenhauf U.; Suvan J.E. | 2015 |
| A 5-year retrospective study on Replace Select Tapered dental implants                                                                                                                                                                                                                                        | Pettersson P.; Sennerby L.                                                                                                                                                                                                                                                    | 2015 |
| All-ceramic restoration of zirconia two-piece implants--a randomized controlled clinical trial                                                                                                                                                                                                                | Payer M.; Heschl A.; Koller M.; Arnetzl G.; Lorenzoni M.; Jakse N.                                                                                                                                                                                                            | 2015 |
| The use of acellular dermal matrix membrane for vertical soft tissue augmentation during submerged implant placement: a case series                                                                                                                                                                           | Puys A.; Vindasiute E.; Linkeviciene L.; Linkevicius T.                                                                                                                                                                                                                       | 2015 |
| Full Mouth Implant-supported Rehabilitation of a Patient with Ectodermal Dysplasia: Clinical Report and Literature Review                                                                                                                                                                                     | Kutkut A.; Abu-Eid R.; Sharab L.; Abadi B.; Van Sickels J.                                                                                                                                                                                                                    | 2015 |
| One-Year Prospective Study of 7-mm-Long Implants in the Mandible: Installation Technique and Crown/Implant Ratio of 1.5 or Less                                                                                                                                                                               | Kim Y.-K.; Yun P.-Y.; Yi Y.-J.; Bae J.-H.; Kim S.-B.; Ahn G.-J.                                                                                                                                                                                                               | 2015 |

|                                                                                                                                                                                                                                                   |                                                                                                                                                                |      |
|---------------------------------------------------------------------------------------------------------------------------------------------------------------------------------------------------------------------------------------------------|----------------------------------------------------------------------------------------------------------------------------------------------------------------|------|
| Dehydrated human amniotic membrane allograft nerve wrap around the prostatic neurovascular bundle accelerates early return to continence and potency following radical robot assisted radical prostatectomy : A propensity score matched analysis | Kumar A.; Samavedi S.; Bates A.; Coelho R.; Rocco B.; Marquez J.; Camacho I.; Jensen C.; Palmer K.; Patel V.                                                   | 2015 |
| Effect of professional mechanical plaque removal performed on a long-term, routine basis in the secondary prevention of periodontitis: a systematic review                                                                                        | Trombelli L.; Franceschetti G.; Farina R.                                                                                                                      | 2015 |
| Peri-implant bacteria associated with different transmucosal designs or smoking habits                                                                                                                                                            | Vacharaksa A.; Kuptanon M.; Sripitiroj R.; Serichetaphongse P.                                                                                                 | 2015 |
| Cellular microparticles as predictive markers for adverse events in patients with implanted ventricular assist devices                                                                                                                            | Walenga J.; Jeske W.; Schwartz J.; Escalante V.; Menapace B.; Coglianesi E.; Kumar E.; Heroux A.; Bakhos M.                                                    | 2015 |
| Introduction of the LINX® reflux management system in a community heartburn center                                                                                                                                                                | Woody M.; Willems K.; Vassaur H.; Wheelless C.J.; Buckley III F.P.                                                                                             | 2015 |
| Comparison of procedural complications and in-hospital clinical outcomes between patients with successful and failed percutaneous intervention of coronary chronic total occlusions: A Meta-Analysis of Observational Studies                     | Khan M.F.; Brilakis E.S.; Wendel C.S.; Thai H.                                                                                                                 | 2015 |
| Bariatric surgery in the elderly is associated with similar surgical morbidity and significant long term health benefits                                                                                                                          | Kaplan U.; Penner S.; Farrokhyar F.; Gmora S.; Hong D.; Anvari M.                                                                                              | 2015 |
| Implant materials generate different peri-implant inflammatory factors: Poly-ether-ether-ketone promotes fibrosis and microtextured titanium promotes osteogenic factors                                                                          | Olivares-Navarrete R.; Hyzy S.L.; Slosar P.J.; Schneider J.M.; Schwartz Z.; Boyan B.D.                                                                         | 2015 |
| Different contribution of BRINP3 gene in chronic periodontitis and peri-implantitis: a cross-sectional study                                                                                                                                      | Casado P.L.; Aguiar D.P.; Costa L.C.; Fonseca M.A.; Vieira T.C.; Alvim-Pereira C.C.; Alvim-Pereira F.; Deeley K.; Granjeiro J.M.; Trevisatto P.C.; Vieira A.R. | 2015 |
| Prevalence and predictive factors for peri-implant disease and implant failure: a cross-sectional analysis                                                                                                                                        | Daubert D.M.; Weinstein B.F.; Bordin S.; Leroux B.G.; Flemming T.F.                                                                                            | 2015 |
| Peri-implant diseases: an overview                                                                                                                                                                                                                | Warreth A.; Boggs S.; Ibieyou N.; El-Helali R.; Hwang S.                                                                                                       | 2015 |
| Multiscale analyses of the bone-implant interface                                                                                                                                                                                                 | Cha J.Y.; Pereira M.D.; Smith A.A.; Houschyar K.S.; Yin X.; Mouraret S.; Brunski J.B.; Helms J.A.                                                              | 2015 |
| Immediate loading with a novel implant featured by variable-threaded geometry, internal conical connection and platform shifting: three-year results from a prospective cohort study                                                              | Pozzi A.; Tallarico M.; Moy P.K.                                                                                                                               | 2015 |
| The outcome of oral implants placed in bone with limited bucco-oral dimensions: a 3-year follow-up study                                                                                                                                          | Temmerman A.; Kestra J.A.; Coucke W.; Teughels W.; Quirynen M.                                                                                                 | 2015 |
| Periodontal considerations in older individuals                                                                                                                                                                                                   | Darby I.                                                                                                                                                       | 2015 |
| Influence of the crown-implant connection on the preservation of peri-implant bone: a retrospective multifactorial analysis                                                                                                                       | Galindo-Moreno P.; Fernández-Jiménez A.; O'Valle F.; Monje A.; Silvestre F.J.; Juodžbalys G.; Sánchez-Fernández E.; Catena A.                                  | 2015 |
| Immediate loading of fixed cross-arch prostheses supported by flapless-placed supershort or long implants: 1-year results from a randomised controlled trial                                                                                      | Cannizzaro G.; Felice P.; Buti J.; Leone M.; Ferri V.; Esposito M.                                                                                             | 2015 |
| Clinical evaluation of two dental implant macrostructures on peri-implant bone loss: a comparative, retrospective study                                                                                                                           | Dagorne C.; Malet J.; Bizouard G.; Mora F.; Rangé H.; Bouchard P.                                                                                              | 2015 |
| Impact of platform switching on marginal peri-implant bone-level changes. A systematic review and meta-analysis                                                                                                                                   | Strietzel F.P.; Neumann K.; Hertel M.                                                                                                                          | 2015 |
| Crestal bone remodeling around implants placed using a short drilling protocol                                                                                                                                                                    | Bratu E.; Mihali S.; Shapira L.; Bratu D.C.; Wang H.-L.                                                                                                        | 2015 |
| Masticatory rehabilitation following upper and lower jaw reconstruction using vascularised free fibula flap and enossal implants-19 years of experience with a comprehensive concept                                                              | Hakim S.G.; Kimmerle H.; Trenkle T.; Sieg P.; Jacobsen H.-C.                                                                                                   | 2015 |
| Effect of Porphyromonas gingivalis lipopolysaccharide on bone marrow mesenchymal stem cell osteogenesis on a titanium nanosurface                                                                                                                 | Xing H.; Taguchi Y.; Komasa S.; Yamawaki I.; Sekino T.; Umeda M.; Okazaki J.                                                                                   | 2015 |
| Histomorphometric assessment of the influence of low-level laser therapy on peri-implant tissue healing in the rabbit mandible                                                                                                                    | Massotti F.P.; Gomes F.V.; Mayer L.; de Oliveira M.G.; Baraldi C.E.; Ponzoni D.; Puricelli E.                                                                  | 2015 |
| Self-reported pain perception of patients after mucosal graft harvesting in the palatal area                                                                                                                                                      | Burkhardt R.; Hämmerle C.H.; Lang N.P.                                                                                                                         | 2015 |
| Comparison of stapling techniques and management of the mesoappendix in laparoscopic appendectomy                                                                                                                                                 | Paul Wright G.; Mitchell E.J.; McClure A.M.; Onesti J.K.; Moyo S.C.; Brown A.R.; Peshkepija A.; Scott G.L.; Chung M.H.                                         | 2015 |
| Osteoprotegerin expression in the peri-implant sulcus fluid after mechanical stimulations at different angles                                                                                                                                     | Fang M.; Wang Z.-Y.; Yu J.; Li M.; Jin D.                                                                                                                      | 2015 |
| A cross-sectional assessment of biomarker levels around implants versus natural teeth in periodontal maintenance patients                                                                                                                         | Recker E.N.; Avila-Ortiz G.; Fischer C.L.; Pagan-Rivera K.; Brogden K.A.; Dawson D.V.; Elangovan S.                                                            | 2015 |
| The effect of the local use of chlorhexidine in surgical treatment of experimental peri-implantitis in dogs                                                                                                                                       | Caruac O.; Abrahamsson I.; Charalampakis G.; Berglundh T.                                                                                                      | 2015 |
| Long-term evaluation of periodontal parameters and implant outcomes in periodontally compromised patients: a systematic review                                                                                                                    | Zangrando M.S.; Damante C.A.; Sant'Ana A.C.; Rubo de Rezende M.L.; Greggi S.L.; Chambrone L.                                                                   | 2015 |
| Clinical evaluation of 262 osseointegrated implants placed in sites grafted with calcium phosphosilicate putty: a retrospective study                                                                                                             | Babbush C.A.; Kanawati A.                                                                                                                                      | 2015 |
| Peri-implant conditions around sintered porous-surfaced (SPS) implants. A 36-month prospective cohort study                                                                                                                                       | Malchiodi L.; Ghensi P.; Cucchi A.; Pieroni S.; Bertossi D.                                                                                                    | 2015 |
| Water jet with adjunct chlorhexidine gel for nonsurgical treatment of peri-implantitis                                                                                                                                                            | Levin L.; Frankenthal S.; Joseph L.; Rozitsky D.; Levi G.; Machtei E.E.                                                                                        | 2015 |
| Periodontopathogen and Epstein-Barr virus-associated periapical periodontitis may be the source of retrograde infectious peri-implantitis                                                                                                         | Verdugo F.; Castillo A.; Simonian K.; Castillo F.; Farez-Vidal E.; D'Addona A.                                                                                 | 2015 |
| Monitoring bone morphogenetic protein-2 and -7, soluble receptor activator of nuclear factor-κB ligand and osteoprotegerin levels in the                                                                                                          | Dolanmaz D.; Saglam M.; Inan O.; Dundar N.; Alniacik G.; Gursay Trak B.; Kocak E.; Hakki S.S.                                                                  | 2015 |

|                                                                                                                                                                                                          |                                                                                                                                                                                             |      |
|----------------------------------------------------------------------------------------------------------------------------------------------------------------------------------------------------------|---------------------------------------------------------------------------------------------------------------------------------------------------------------------------------------------|------|
| peri-implant sulcular fluid during the osseointegration of hydrophilic-modified sandblasted acid-etched and sandblasted acid-etched surface dental implants                                              |                                                                                                                                                                                             |      |
| LASER sintered one-piece early-loaded dental implants for mandibular premolars replacement                                                                                                               | El-Gammal M.; Ghoneem N.; Tawfik H.; Madina M.A.; Maria O.M.                                                                                                                                | 2015 |
| Immediate loading of mandibular overdentures supported by one-piece, direct metal laser sintering mini-implants: a short-term prospective clinical study                                                 | Mangano F.G.; Caprioglio A.; Levirini L.; Farronato D.; Zecca P.A.; Mangano C.                                                                                                              | 2015 |
| Adherent endotoxin on dental implant surfaces: a reappraisal                                                                                                                                             | Morra M.; Cassinelli C.; Bollati D.; Cascardo G.; Bellanda M.                                                                                                                               | 2015 |
| Short implants in maxillary and mandibular rehabilitations: interim results (6 to 42 months) of a prospective study                                                                                      | Taschieri S.; Corbella S.; Molinari R.; Saita M.; Del Fabbro M.                                                                                                                             | 2015 |
| Dimensional changes in soft tissues around dental implants following free gingival grafting: an experimental study in dogs                                                                               | Bengazi F.; Lang N.P.; Caroprese M.; Urbizo Velez J.; Favero V.; Botticelli D.                                                                                                              | 2015 |
| Implant survival after preparation of the implant site using a single bur: a case series                                                                                                                 | Bettach R.; Taschieri S.; Boukhris G.; Del Fabbro M.                                                                                                                                        | 2015 |
| A review of oral surgery-related papers published in the British Journal of Oral and Maxillofacial Surgery during 2011 and 2012                                                                          | Tahim A.S.; Goodson A.M.C.; Payne K.F.B.; Brennan P.A.                                                                                                                                      | 2015 |
| Clinical and radiographic evaluation of narrow- vs. regular-diameter dental implants: a 3-year follow-up. A retrospective study                                                                          | Zweers J.; van Doornik A.; Hogendorf E.A.; Quirynen M.; Van der Weijden G.A.                                                                                                                | 2015 |
| Comparative analysis of dental implant treatment outcomes following mandibular reconstruction with double-barrel fibula bone grafting or vertical distraction osteogenesis fibula: a retrospective study | Wang F.; Huang W.; Zhang C.; Sun J.; Kaigler D.; Wu Y.                                                                                                                                      | 2015 |
| Marginal bone response of implants with platform switching and non-platform switching abutments in posterior healed sites: a 1-year prospective study                                                    | Wang Y.-C.; Kan J.Y.; Rungcharassaeng K.; Roe P.; Lozada J.L.                                                                                                                               | 2015 |
| Radiographic comparison of periimplant bone resorption and assessment of survival rates of 2 implant systems: a 10-year prospective multicenter study                                                    | Perrotti V.; Ravera L.; Ricci L.; Doi K.; Piattelli A.; Shibli J.; Iezzi G.                                                                                                                 | 2015 |
| Long-term results after subcrestal or crestal placement of delayed loaded implants                                                                                                                       | Romanos G.E.; Aydin E.; Gaertner K.; Nentwig G.-H.                                                                                                                                          | 2015 |
| Titanium particles and mechanical instability of implants induce osteoclast differentiation through indistinguishable inflammatory pathways                                                              | Amirhosseini M.; Andersson G.; Aspenberg P.; Fahlgren A.                                                                                                                                    | 2015 |
| Ridge expansion alone or in combination with guided bone regeneration to facilitate implant placement in narrow alveolar ridges: a retrospective study                                                   | Tang Y.-L.; Yuan J.; Song Y.-L.; Ma W.; Chao X.; Li D.-H.                                                                                                                                   | 2015 |
| Dramatic osteonecrosis of the jaw associated with oral bisphosphonates, periodontitis, and dental implant removal                                                                                        | Fernández Ayora A.; Herion F.; Rompen E.; Reginster J.Y.; Magremanne M.; Lambert F.                                                                                                         | 2015 |
| Evaluation of human periimplant soft tissues around nonsubmerged machined standard and platform-switched abutments                                                                                       | Collins J.R.; Berg R.W.; Rodríguez M.; Rodríguez I.; Coelho P.G.; Tovar N.                                                                                                                  | 2015 |
| Double crown-retained maxillary overdentures: 5-year follow-up                                                                                                                                           | Frisch E.; Ziebolz D.; Ratka-Krüger P.; Rinke S.                                                                                                                                            | 2015 |
| Minimally invasive treatment of soft tissue deficiency around an implant-supported restoration in the esthetic zone: modified VISTA technique case report                                                | Lee C.-T.; Hamalian T.; Schulze-Späte U.                                                                                                                                                    | 2015 |
| Effects of peri-implant plastic surgery and hyperbaric oxygen therapy on mandibular avascular necrosis after implant surgery                                                                             | Baltacıoğlu E.; Bağış B.; Arslan A.; Kehribar M.A.; Yuva P.; Aydın G.; Yılmaz M.; Şenel F.Ç.                                                                                                | 2015 |
| Assessment of functional improvement with implant-supported prosthetic rehabilitation after mandibular reconstruction with a microvascular free fibula flap: A study of 25 patients                      | Bodard A.-G.; Salino S.; Desoutter A.; Deneuve S.                                                                                                                                           | 2015 |
| Mixed donor chimerism after allogeneic transplant in patients with wiskott-aldrich syndrome                                                                                                              | Ngwube A.; Forbes L.; Krance R.A.; Brenner M.; Heslop H.E.; Leung K.; Hanson I.C.; Sasa G.; Rosenblatt H.; Leen A.M.; Shearer W.; Naik S.; Ahmed N.M.; Gottschalk S.; Allen C.; Martinez C. | 2015 |
| Financial analysis of revision knee surgery based on NHS tariffs and hospital costs Does it pay to provide a revision service?                                                                           | Kallala R.F.; Ibrahim M.S.; Sarmah S.; Haddad F.S.; Vanhegan I.S.                                                                                                                           | 2015 |
| Staged versus multi-vessel revascularization in primary percutaneous coronary intervention for acute ST-segment elevation myocardial infarction based on peri-procedural success rate: A pilot study     | Saad M.; Rashed A.; El-Haddad M.A.; El-Kilany W.; Wadee B.; Nassar A.                                                                                                                       | 2015 |
| Abnormal uterine bleeding as the first manifestation of hemostasis system abnormalities                                                                                                                  | Saidova R.A.; Makatsariya A.D.                                                                                                                                                              | 2015 |
| Peri-implant diseases: Diagnosis and treatment                                                                                                                                                           | Frau Sancho S.; Espadas Dominguez M.; De Clemente-Rodríguez De Rivera E.; Teixidor Olmo I.; Arranz Obispo C.; López López J.                                                                | 2015 |
| Peri-implant infections of oral biofilm etiology                                                                                                                                                         | Belibasakis G.N.; Charalampakis G.; Bostanci N.; Stadlinger B.                                                                                                                              | 2015 |
| Nonsurgical periodontal management of iatrogenic peri-implantitis: A clinical report                                                                                                                     | Roncati M.; Lauritano D.; Tagliabue A.; Tettamanti L.                                                                                                                                       | 2015 |
| The effect of keratinized mucosa width on peri-implant outcome under supportive postimplant therapy                                                                                                      | Frisch E.; Ziebolz D.; Vach K.; Ratka-Krüger P.                                                                                                                                             | 2015 |
| Group D. Initiator paper. Implants--peri-implant (hard and soft tissue) interactions in health and disease: the impact of explosion of implant manufacturers                                             | Ivanovski S.                                                                                                                                                                                | 2015 |
| Role of reactive oxygen species and advanced glycation end products in the malfunctioning of dental implants                                                                                             | Guo M.; Liu L.; Zhang J.; Liu M.                                                                                                                                                            | 2015 |
| Implant-based rehabilitation in oncology patients can be performed with high long-term success                                                                                                           | Hessling S.A.; Wehrhan F.; Schmitt C.M.; Weber M.; Schlittenbauer T.; Scheer M.                                                                                                             | 2015 |

|                                                                                                                                                                                                      |                                                                                                                     |      |
|------------------------------------------------------------------------------------------------------------------------------------------------------------------------------------------------------|---------------------------------------------------------------------------------------------------------------------|------|
| Predictors of excess cement and tissue response to fixed implant-supported dentures after cementation                                                                                                | Korsch M.; Robra B.-P.; Walther W.                                                                                  | 2015 |
| Practice-based clinical evaluation of zirconia abutments for anterior single-tooth restorations                                                                                                      | Rinke S.; Lattke A.; Eickholz P.; Kramer K.; Ziebolz D.                                                             | 2015 |
| Clinical study of 19 cases resulting in dental implant removal                                                                                                                                       | Suzuki H.; Takahashi D.; Matsuo K.; Kimoto A.; Matsumoto K.; Hasegawa T.; Akashi M.; Komori T.                      | 2015 |
| Erythritol-Enriched Air-Polishing Powder for the Surgical Treatment of Peri-Implantitis                                                                                                              | Taschieri S.; Weinstein R.; Del Fabbro M.; Corbella S.                                                              | 2015 |
| Foreign bodies associated with peri-implantitis human biopsies                                                                                                                                       | Wilson T.G.; Valderrama P.; Burbano M.; Blansett J.; Levine R.; Kessler H.; Rodrigues D.C.                          | 2015 |
| Palatal positioned implants in severely atrophic maxillae versus conventional implants to support fixed full-arch prostheses: Controlled retrospective study with 5 years of follow-up               | Candel-Marti E.; Peñarrocha-Oltra D.; Bagán L.; Peñarrocha-Diago M.; Peñarrocha-Diago M.                            | 2015 |
| Ligature-induced peri-implant infection in crestal and subcrestal implants: A clinical and radiographic study in dogs                                                                                | Huang B.; Piao M.; Zhang L.; Wang X.; Xu L.; Zhu W.; Meng H.                                                        | 2015 |
| Low-level laser therapy improves peri-implant bone formation: Resonance frequency, electron microscopy, and stereology findings in a rabbit model                                                    | Gomes F.V.; Mayer L.; Massotti F.P.; Baraldi C.E.; Ponzoni D.; Webber J.B.B.; De Oliveira M.G.                      | 2015 |
| Rehabilitation of irradiated patients with chemically modified and conventional SLA implants: five-year follow-up                                                                                    | Nack C.; Raguse J.-D.; Stricker A.; Nelson K.; Nahles S.                                                            | 2015 |
| Dental implant status of patients receiving long-term nursing care in Japan                                                                                                                          | Kimura T.; Wada M.; Suganami T.; Miwa S.; Hagiwara Y.; Maeda Y.                                                     | 2015 |
| A multifactorial analysis to identify predictors of implant failure and peri-implant bone loss                                                                                                       | Vervaeke S.; Collaert B.; Cosyn J.; Deschepper E.; De Bruyn H.                                                      | 2015 |
| Application of high resolution synchrotron micro-CT radiation in dental implant osseointegration                                                                                                     | Neldam C.A.; Lauridsen T.; Rack A.; Lefolli T.T.; Jørgensen N.R.; Feidenhans L R.; Pinholt E.M.                     | 2015 |
| Macrophage migration inhibitory factor in lipopolysaccharide-induced peri-implant inflammation of bone marrow mesenchymal stem cells                                                                 | Xia D.-J.; Pei H.                                                                                                   | 2015 |
| Clinical evaluation of immediate loading of titanium orthodontic implants                                                                                                                            | Chopra S.S.; Chakranarayan S.L.C.A.                                                                                 | 2015 |
| Cone beam computed tomography evaluation of regenerated buccal bone 5 years after simultaneous implant placement and guided bone regeneration procedures—a randomized, controlled clinical trial     | Jung R.E.; Benic G.I.; Scherrer D.; Hämmerle C.H.                                                                   | 2015 |
| Long-term evaluation of ANKYLOS® dental implants, part i: 20-year life table analysis of a longitudinal study of more than 12,500 implants                                                           | Krebs M.; Schmenger K.; Neumann K.; Weigl P.; Moser W.; Nentwig G.-H.                                               | 2015 |
| Immediately loaded mini dental implants as overdenture retainers: 1-Year cohort study of implant stability and peri-implant marginal bone level                                                      | Šćepanović M.; Todorović A.; Marković A.; Patnogić V.; Miličić B.; Moufti A.M.; Mišić T.                            | 2015 |
| Failures in dental implants: A literature review                                                                                                                                                     | Ramesh Reddy J.; Muthu Kumar B.; Ahila S.C.; Suganya S.                                                             | 2015 |
| Long-term retrospective evaluation of the peri-implant bone level in onlay grafted patients with iliac bone from the anterior superior iliac crest                                                   | Fretwurst T.; Nack C.; Al-Ghrai M.; Raguse J.D.; Stricker A.; Schmelzeisen R.; Nelson K.; Nahles S.                 | 2015 |
| The influence of the periodontal biotype on peri-implant tissues around immediate implants with and without xenografts. Clinical and micro-computerized tomographic study in small Beagle dogs       | Maia L.P.; Reino D.M.; Muglia V.A.; de Souza S.L.; Palioto D.B.; Novaes A.B.                                        | 2015 |
| Etiology and clinical characteristics of symptomatic unilateral maxillary sinusitis: A review of 174 cases                                                                                           | Troeltzsch M.; Pache C.; Troeltzsch M.; Kaeppler G.; Ehrenfeld M.; Otto S.; Probst F.                               | 2015 |
| Long-term results of mandibular reconstruction of continuity defects with fibula free flap and implant-borne dental rehabilitation                                                                   | Fang W.; Liu Y.-P.; Ma Q.; Liu B.-L.; Zhao Y.                                                                       | 2015 |
| Osseointegrated implants placed at supracrestal level may harbour higher counts of A. gerencseriae and S. constellatus - A randomized, controlled pilot study                                        | de Moraes Rego M.R.; Torres M.F.; Santiago L.C.; Lira-Junior R.; Lourenço E.J.; de Moraes Telles D.; Figueredo C.M. | 2015 |
| Fresh frozen versus autogenous iliac bone for the rehabilitation of the extremely atrophic maxilla with onlay grafts and endosseous implants: preliminary results of a prospective comparative study | Chiapasco M.; Di Martino G.; Anello T.; Zaniboni M.; Romeo E.                                                       | 2015 |
| High Insertion Torque and Peri-Implant Bone Loss: Is There a Relationship?                                                                                                                           | Bidgoli M.; Soheilifar S.; Faradmal J.; Soheilifar S.                                                               | 2015 |
| Tissue-engineered oral mucosa grafts for intraoral lining reconstruction of the maxilla and mandible with a fibula flap                                                                              | Sieira Gil R.; Pagés C.M.; Díez E.G.; Llames S.; Fuertes A.F.; Vilagran J.L.                                        | 2015 |
| Complications with computer-aided designed/computer-assisted manufactured titanium and soldered gold bars for mandibular implant-overdentures: short-term observations                               | Katsoulis J.; Wälchli J.; Kobel S.; Gholami H.; Mericske-Stern R.                                                   | 2015 |
| Cement-associated signs of inflammation: retrospective analysis of the effect of excess cement on peri-implant tissue                                                                                | Korsch M.; Robra B.-P.; Walther W.                                                                                  | 2015 |
| Plasma deposited silicon oxide films for controlled permeation of copper as antimicrobial agent                                                                                                      | Lehmann A.; Rupf S.; Schubert A.; Zylla I.-M.; Seifert H.J.; Schindler A.; Arnold T.                                | 2015 |
| A prospective, randomized, controlled study using OsseoSpeed™ implants placed in maxillary fresh extraction socket: soft tissues response                                                            | Cecchinato D.; Lops D.; Salvi G.E.; Sanz M.                                                                         | 2015 |
| Influence of prosthetic parameters on peri-implant bone resorption in the first year of loading: a multi-factorial analysis                                                                          | Hof M.; Pommer B.; Zukic N.; Vasak C.; Lorenzoni M.; Zechner W.                                                     | 2015 |
| Influence of immediate loading on healing of implants installed with different insertion torques—an experimental study in dogs                                                                       | Rea M.; Botticelli D.; Ricci S.; Soldini C.; González G.G.; Lang N.P.                                               | 2015 |
| Application of concentrated growth factor in maxillary sinus lift: Variation in peri-implant bone levels                                                                                             | Huang N.; Wu F.; Li P.; Liu Z.-P.; Lin J.; Tang Y.-C.; Wang Y.-Q.                                                   | 2015 |
| Hard and soft tissue changes around implants installed in regular-sized and reduced alveolar bony ridges. An experimental study in dogs                                                              | Baffone G.; Lang N.P.; Pantani F.; Favero G.; Ferri M.; Botticelli D.                                               | 2015 |

|                                                                                                                                                                                                                     |                                                                                                                    |      |
|---------------------------------------------------------------------------------------------------------------------------------------------------------------------------------------------------------------------|--------------------------------------------------------------------------------------------------------------------|------|
| Influence of oral bisphosphonates in patients with dental implants                                                                                                                                                  | Jalil-Abumalham D.; Hurtado Celotti D.; Buesa Báez J.M.; Rubio Alonso L.; Martínez-González J.M.                   | 2015 |
| Combined local and systemic antibiotic treatment is effective against experimental <i>Staphylococcus aureus</i> peri-implant biofilm infection                                                                      | Van Der Horst A.S.; Medda S.; Ledbetter E.; Liu A.; Weinhold P.; Del Gaizo D.J.; Dahners L.                        | 2015 |
| Patients With Transmandibular Implants Are at Risk for Severe Complications When Becoming Frail                                                                                                                     | Hoeksema A.R.; Raghoobar G.M.; Vissink A.; Visser A.                                                               | 2015 |
| Survival rate of osseointegrated implants in atrophic maxillae grafted with calvarial bone: A retrospective study                                                                                                   | Quiles J.C.; Souza F.A.; Bassi A.P.F.; Garcia I.R.; França M.T.; Carvalho P.S.P.                                   | 2015 |
| Reverse oblique and transverse intertrochanteric femoral fractures treated with the long cephalomedullary nail                                                                                                      | Irgit K.; Richard R.D.; Beebe M.J.; Bowen T.R.; Kubiak E.; Horwitz D.S.                                            | 2015 |
| Assessment of the efficacy of a novel antibiotic coating in decreasing periprosthetic infection using an established in vivo mouse model                                                                            | Loflin A.H.; Zhu S.; Stavrakis A.I.; Manegold J.E.; Richman S.A.; Segura T.; Bernthal N.M.                         | 2015 |
| Histomorphological analysis of peri-implant bone tissue of an implant in use for 10 years: A case report                                                                                                            | Fuentes Fernández R.; Valdivia I.; Borie E.; Beltran V.; Bucchi C.                                                 | 2015 |
| Long-term peri-implant bone level changes of non-vascularized fibula bone grafted edentulous patients                                                                                                               | Duttenhoefer F.; Nack C.; Doll C.; Raguse J.-D.; Hell B.; Stricker A.; Nelson K.; Nahles S.                        | 2015 |
| Peri-prosthetic infection - An algorithmic approach to diagnosis and management                                                                                                                                     | Ailabouni R.; Jennings A.; Hooper G.                                                                               | 2015 |
| Peri-implant bone loss of dental implants with platform-switching design after 5 years of loading: a cross-sectional study                                                                                          | Joda T.; Michelaki I.; Heydecke G.                                                                                 | 2015 |
| The CD200 tolerance-signaling molecule and its receptor, CD200R1, are expressed in human placental villus trophoblast and in peri-implant decidua by 5 weeks' gestation                                             | Clark D.A.; Arredondo J.L.; Dhesy-Thind S.                                                                         | 2015 |
| Sclerostin antibody treatment improves implant fixation in a model of severe osteoporosis                                                                                                                           | Virdi A.S.; Irish J.; Sena K.; Liu M.; Ke H.Z.; McNulty M.A.; Sumner D.R.                                          | 2015 |
| Fate of modular cardiac tissue constructs in a syngeneic rat model                                                                                                                                                  | Leung B.M.; Miyagi Y.; Li R.-K.; Sefton M.V.                                                                       | 2015 |
| Prospective randomised evaluation of a collagen/thrombin and autologous platelet haemostatic agent during cementless total hip arthroplasty                                                                         | Joyce D.M.; Klika A.K.; Mutnal A.; Krebs V.; Molloy R.; Knothe U.; Barsoum W.K.                                    | 2015 |
| Clinical outcomes of total hip arthroplasty for fractured neck of femur in patients over 75 years                                                                                                                   | Travis E.C.; Tan R.S.; Funaki P.; McChesney S.J.; Patel S.C.; Brogan K.                                            | 2015 |
| (viii) Peri-prosthetic fractures of the hip: A new approach                                                                                                                                                         | Das R.; Haddad F.S.                                                                                                | 2015 |
| Successful Use of Pre and Post-operative ECMO for Pulmonary Endarterectomy, Mitral Valve Replacement and Myomectomy in a Patient with Chronic Thromboembolic Pulmonary Hypertension and Hypertrophic Cardiomyopathy | Williams L.; Kermeen F.; Mullany D.; Thomson B.                                                                    | 2015 |
| Impact of radiation history, gender and age on bone quality in sites for orthodontic skeletal anchorage device placement                                                                                            | Konermann A.; Appel T.; Wenghoefer M.; Sirokay S.; Dirk C.; Jäger A.; Götz W.                                      | 2015 |
| Incorporation of raloxifene-impregnated allograft around orthopedic titanium implants impairs early fixation but improves new bone formation: A 4-week study in 12 dogs                                             | Hermansen L.L.; Sørensen M.; Barckman J.; Bechtold J.E.; Soballe K.; Baas J.                                       | 2015 |
| Subjective and objective outcomes 5 years after mid-urethral sling                                                                                                                                                  | St Louis S.; Gurshumov E.; Salamon C.; Mushonga N.C.; Pagnillo J.; Culligan P.                                     | 2015 |
| Risk of pocket hematoma in patients on chronic anticoagulation with warfarin undergoing electrophysiological device implantation: A comparison of different peri-operative management strategies                    | Proietti R.; Porto I.; Levi M.; Leo A.; Russo V.; Kalfon E.; Biondi-Zoccai G.; Roux J.-F.; Birnie D.H.; Essebav V. | 2015 |
| Potential Savings in Prescription Drug Costs for Hypertension, Hyperlipidemia, and Diabetes Mellitus by Equivalent Drug Substitution in Austria: A Nationwide Cohort Study                                          | Heinze G.; Hronsky M.; Reichardt B.; Baumgärtel C.; Müllner M.; Bucsics A.; Winkelmayer W.C.                       | 2014 |
| The XB130/Tks5 adaptor protein interaction regulates Src-mediated signal transduction                                                                                                                               | Moodley S.; Liu M.                                                                                                 | 2014 |
| Balloon angioplasty, with and without stenting, versus medical therapy for hypertensive patients with renal artery stenosis                                                                                         | Jenks S.; Yeoh S.E.; Conway B.R.                                                                                   | 2014 |
| Incidence of peri-implant mucositis and peri-implantitis in edentulous patients with an implant-retained mandibular overdenture during a 10-year follow-up period                                                   | Meijer H.J.; Raghoobar G.M.; de Waal Y.C.; Vissink A.                                                              | 2014 |
| Early, delayed, or late single implant placement: 10-year results from a randomized controlled clinical trial                                                                                                       | Schropp L.; Wenzel A.; Stavropoulos A.                                                                             | 2014 |
| Research advances in peri-implantitis relevant factors and therapy                                                                                                                                                  | Shen Y.; Zou D.; Wu Y.                                                                                             | 2014 |
| Immediately loaded platform-switched implants in the anterior mandible with fixed prostheses: a randomized, split-mouth, masked prospective trial                                                                   | Romanos G.E.; Malmstrom H.; Feng C.; Ercoli C.; Caton J.                                                           | 2014 |
| Three-year results from a randomised controlled trial comparing prostheses supported by 5-mm long implants or by longer implants in augmented bone in posterior atrophic edentulous jaws                            | Esposito M.; Pistilli R.; Barausse C.; Felice P.                                                                   | 2014 |
| Short implants versus longer implants in vertically augmented posterior mandibles: a randomised controlled trial with 5-year after loading follow-up                                                                | Felice P.; Cannizzaro G.; Barausse C.; Pistilli R.; Esposito M.                                                    | 2014 |
| Synthesis of new antibacterial composite coating for titanium based on highly ordered nanoporous silica and silver nanoparticles                                                                                    | Massa M.A.; Covarrubias C.; Bittner M.; Fuentevilla I.A.; Capetillo P.; Von Martens A.; Carvajal J.C.              | 2014 |
| Implant treatment planning: endodontic considerations                                                                                                                                                               | Simonian K.; Frydman A.; Verdugo F.; Roges R.; Kar K.                                                              | 2014 |
| A comparison of two dental implant systems in partially edentulous patients: 1-year post-loading results from a pragmatic multicentre randomised controlled trial                                                   | Felice P.; Barausse C.; Blasone R.; Favaretto G.; Stacchi C.; Calvo M.; Marin C.; Buti J.; Esposito M.             | 2014 |

|                                                                                                                                                                                                                                                   |                                                                                                          |      |
|---------------------------------------------------------------------------------------------------------------------------------------------------------------------------------------------------------------------------------------------------|----------------------------------------------------------------------------------------------------------|------|
| Effects of immediate and delayed loading on peri-implant trabecular structures: a cone beam CT evaluation                                                                                                                                         | Huang Y.; Van Dessel J.; Liang X.; Depypere M.; Zhong W.; Ma G.; Lambrechts I.; Maes F.; Jacobs R.       | 2014 |
| Crestal approach for maxillary sinus augmentation in patients with $\leq 4$ mm of residual alveolar bone                                                                                                                                          | Gonzalez S.; Tuan M.-C.; Ahn K.M.; Nowzari H.                                                            | 2014 |
| The influence of platform switching on clinical, laboratory, and image-based measures: a prospective clinical study                                                                                                                               | Dursun E.; Tulunoglu I.; Ozbek S.M.; Uysal S.; Akalın F.A.; Kilinc K.; Karabulut E.; Tözüm T.F.          | 2014 |
| An in vitro study of hard tissue formation around implants with culture of HMS0014 cells in cellmatrix type I-A collagen gel 3D scaffold                                                                                                          | Iwai Y.; Morishita A.; Nakatsuka M.; Ueno K.; Kumabe S.                                                  | 2014 |
| Melatonin as a candidate therapeutic drug for protecting bone cells from chlorhexidine-induced damage                                                                                                                                             | Proksch S.; Strobel S.L.; Vach K.; Abouassi T.; Tomakidi P.; Ratka-Krüger P.; Hellwig E.                 | 2014 |
| Piezoelectric vs. conventional drilling in implant site preparation: pilot controlled randomized clinical trial with crossover design                                                                                                             | Canullo L.; Peñarrocha D.; Peñarrocha M.; Rocio A.-G.; Penarrocha-Diago M.                               | 2014 |
| Novel Broad-Spectrum Antimicrobial Photoinactivation of In Situ Oral Biofilms by Visible Light plus Water-Filtered Infrared A                                                                                                                     | Karygianni L.; Ruf S.; Follo M.; Hellwig E.; Bucher M.; Anderson A.C.; Vach K.; Al-Ahmad A.              | 2014 |
| Revision Surgery Occurs Frequently After Percutaneous Fixation of Stable Femoral Neck Fractures in Elderly Patients                                                                                                                               | Kain M.S.; Marcantonio A.J.; Iorio R.                                                                    | 2014 |
| Higher levels of plasminogen-activator inhibitor 1 are associated with progression of coronary artery calcification in middle-aged women: The study of women's health across the nation (SWAN) heart study                                        | Wang N.C.; Matthews K.A.; Barinas-Mitchell E.J.; Chang C.-C.H.; El Khoudary S.R.                         | 2014 |
| Incidence and predictors of peri-procedure complications with transvenous lead extractions in the real world: Data from NCDR ICD registry                                                                                                         | Sood N.; Martin D.; Clancy J.; Curtis J.; Parzynski C.S.; Lampert R.                                     | 2014 |
| Heart fat, but not peri-aortic fat depots were significantly associated with presence and severity of coronary calcification in women at midlife: The study of women's health across the nation (SWAN) ectopic cardiovascular fat ancillary study | El Khoudary S.R.; Shields K.; Budoff M.; Barinas-Mitchell E.; Janssen I.; Everson-Rose S.; Matthews K.A. | 2014 |
| Biofunctionalization of microgroove titanium surfaces with an antimicrobial peptide to enhance their bactericidal activity and cytocompatibility                                                                                                  | Zhou L.; Lai Y.; Huang W.; Huang S.; Xu Z.; Chen J.; Wu D.                                               | 2015 |
| Estimation of bone loss biomarkers as a diagnostic tool for peri-implantitis                                                                                                                                                                      | Rakic M.; Struillou X.; Petkovic-Curcin A.; Matic S.; Canullo L.; Sanz M.; Vojvodic D.                   | 2014 |
| Prevalence of peri-implantitis in patients with implant-supported fixed prostheses                                                                                                                                                                | Schuldt Filho G.; Dalago H.R.; Oliveira de Souza J.G.; Stanley K.; Jovanovic S.; Bianchini M.A.          | 2014 |
| Surgical treatment of peri-implantitis using a bone substitute with or without a resorbable membrane: a 5-year follow-up                                                                                                                          | Roos-Jansäker A.-M.; Persson G.R.; Lindahl C.; Renvert S.                                                | 2014 |
| Follow-up study of implants with turned or oxidized surfaces placed after sinus augmentation                                                                                                                                                      | Jungner M.; Legrell P.E.; Lundgren S.                                                                    | 2014 |
| Biologic width adjacent to loaded implants with machined and rough collars in the dog                                                                                                                                                             | Cochran D.L.; Obrecht M.; Weber K.; Dard M.; Bosshardt D.; Higginbottom F.L.; Wilson T.G.; Jones A.A.    | 2014 |
| kgp, rgpA, and rgpB DNA vaccines induce antibody responses in experimental peri-implantitis                                                                                                                                                       | Guo M.; Wang Z.; Fan X.; Bian Y.; Wang T.; Zhu L.; Lan J.                                                | 2014 |
| The impact of subcrestal placement on short locking-taper implants placed in posterior maxilla and mandible: A retrospective evaluation on hard and soft tissues stability after 2 years of loading                                               | Lombardo G.; Corrocher G.; Pighi J.; Faccioni F.; Rovera A.; Marincola M.; Nocini P.F.                   | 2014 |
| Antibiotic prophylaxis patterns of Finnish dentists performing dental implant surgery                                                                                                                                                             | Pyysalo M.; Helminen M.; Antalainen A.-K.; Sándor G.K.; Wolff J.                                         | 2014 |
| Clinical and radiographic evaluation of early loaded maxillary anterior single-tooth bone-level implants                                                                                                                                          | Vanlioğlu B.A.; Kahramanoğlu E.; Ozkan Y.; Kulak-Özkan Y.                                                | 2014 |
| Impact of implant-abutment connection, positioning of the machined collar/microgap, and platform switching on crestal bone level changes. Camlog Foundation Consensus Report                                                                      | Schwarz F.; Alcoforado G.; Nelson K.; Schaer A.; Taylor T.; Beuer F.; Strietzel F.P.                     | 2014 |
| Long-term stability of soft tissues following alveolar ridge preservation: 10-year results of a prospective study around nonsubmerged implants                                                                                                    | Roccuzzo M.; Gaudio L.; Bunino M.; Dalmaso P.                                                            | 2014 |
| Influence of two different machined-collar heights on crestal bone loss                                                                                                                                                                           | Herrero-Climent M.; Romero Ruiz M.M.; Díaz-Castro C.M.; Bullón P.; Ríos-Santos J.V.                      | 2014 |
| A retrospective radiographic study on the effect of natural tooth-implant proximity and an introduction to the concept of a bone-loading platform switch                                                                                          | Urdaneta R.A.; Seemann R.; Dragan I.-F.; Lubelski W.; Leary J.; Chuang S.-K.                             | 2014 |
| Role of photofunctionalization in mitigating impaired osseointegration associated with type 2 diabetes in rats                                                                                                                                    | Sugita Y.; Honda Y.; Kato I.; Kubo K.; Maeda H.; Ogawa T.                                                | 2014 |
| Effect of cantilevers for implant-supported prostheses on marginal bone loss and prosthetic complications: systematic review and meta-analysis                                                                                                    | Torreillas-Martínez L.; Monje A.; Lin G.-H.; Suarez F.; Ortega-Oller I.; Galindo-Moreno P.; Wang H.-L.   | 2014 |
| Short-term retrospective case series of implant-assisted removable partial dentures with locator abutments                                                                                                                                        | Ortiz-Puigpelat O.; Gargallo-Albiol J.; Hernández-Alfaro F.; Cabratosa-Termes J.                         | 2014 |
| An observational study on epidemiology and risk factors of peri-prosthetic joint infection                                                                                                                                                        | Toro G.; Rizzo V.; Lepore L.; Gison M.; Viafora G.; Ascione T.; Toro A.                                  | 2014 |
| Implementation of international chart review studies: An assessment of ethics and regulatory considerations                                                                                                                                       | Jean-Mary J.; Stein D.; Yeomans K.; Payne K.A.                                                           | 2014 |
| Management of peri-implant mucositis and peri-implantitis                                                                                                                                                                                         | Figuero E.; Graziani F.; Sanz I.; Herrera D.; Sanz M.                                                    | 2014 |
| Generalized aggressive periodontitis as a risk factor for dental implant failure: a systematic review and meta-analysis                                                                                                                           | Monje A.; Alcoforado G.; Padial-Molina M.; Suarez F.; Lin G.-H.; Wang H.-L.                              | 2014 |
| Treatment outcome following use of the erbium, chromium:yttrium, scandium, gallium, garnet laser in the non-surgical management of peri-implantitis: a case series                                                                                | Al-Falaki R.; Cronshaw M.; Hughes F.J.                                                                   | 2014 |
| Repair of peri-implant bone loss after occlusal adjustment: a case report                                                                                                                                                                         | Merin R.L.                                                                                               | 2014 |



|                                                                                                                                                                                     |                                                                                                                                            |      |
|-------------------------------------------------------------------------------------------------------------------------------------------------------------------------------------|--------------------------------------------------------------------------------------------------------------------------------------------|------|
| Supportive post-implant therapy: patient compliance rates and impacting factors: 3-year follow-up                                                                                   | Frisch E.; Ziebolz D.; Vach K.; Ratka-Krüger P.                                                                                            | 2014 |
| The effect of loading on peri-implant bone: a critical review of the literature                                                                                                     | Duyck J.; Vandamme K.                                                                                                                      | 2014 |
| Long-term results of a three arms prospective cohort study on implants in periodontally compromised patients: 10-year data around sandblasted and acid-etched (SLA) surface         | Roccuzzo M.; Bonino L.; Dalmaso P.; Aglietta M.                                                                                            | 2014 |
| Peri-implantitis. Part 3: current modes of management                                                                                                                               | Alani A.; Bishop K.                                                                                                                        | 2014 |
| Effects of antibiofilm compounds on the cellular and bacterial colonization of polymeric surfaces: A step towards biofunctionalization of implantable devices                       | Neto A.R.L.P.; Piaia L.; Paes C.Q.; Aragones A.; De Souza Magini R.; Porto L.M.; Pereira U.A.; De Almeida Barbosa L.C.; De Lima Pimenta A. | 2014 |
| Influence of surgical and prosthetic techniques on marginal bone loss around titanium implants. Part I: immediate loading in fresh extraction sockets                               | Berberi A.N.; Tehini G.E.; Noujeim Z.F.; Khairallah A.A.; Abousehlib M.N.; Salameh Z.A.                                                    | 2014 |
| Immediate implants at fresh extraction sockets: from myth to reality                                                                                                                | Vignoletti F.; Sanz M.                                                                                                                     | 2014 |
| Etiology and treatment of periapical lesions around dental implants                                                                                                                 | Temmerman A.; Lefever D.; Teughels W.; Balshi T.J.; Balshi S.F.; Quirynen M.                                                               | 2014 |
| A prospective multicenter study of immediate function of 1-piece implants: a 3-year follow-up report                                                                                | Sato J.; Watanabe G.; Ando M.; Shimoo Y.; Shizukuda K.; Kimura T.; Kobayashi M.                                                            | 2014 |
| Periimplant bone-level reduction in relation to hydroxyapatite-coated dental implants that act as mandibular overdenture retainers: results at 6 to 10 years                        | Leventi E.; Malden N.J.; Lopes V.R.                                                                                                        | 2014 |
| Implant therapy: 40 years of experience                                                                                                                                             | Quirynen M.; Herrera D.; Teughels W.; Sanz M.                                                                                              | 2014 |
| A systematic review on marginal bone loss around short dental implants (<10 mm) for implant-supported fixed prostheses                                                              | Monje A.; Suarez F.; Galindo-Moreno P.; García-Nogales A.; Fu J.-H.; Wang H.-L.                                                            | 2014 |
| Generation of an rhBMP-2-loaded beta-tricalcium phosphate/hydrogel composite and evaluation of its efficacy on peri-implant bone formation                                          | Lee J.H.; Ryu M.Y.; Baek H.-R.; Seo J.-H.; Lee K.-M.; Lee J.-H.                                                                            | 2014 |
| The platform switching concept revisited. An experimental study in dogs                                                                                                             | Bressan E.; Lang N.P.; Corazza B.; Ricci S.; Almagro Urrutia Z.; Botticelli D.                                                             | 2014 |
| Impact of insertion torque and implant neck design on peri-implant bone level: a randomized split-mouth trial                                                                       | Hof M.; Pommer B.; Strbac G.D.; Vasak C.; Agis H.; Zechner W.                                                                              | 2014 |
| Implant over implant: an alternative method for solving malpositioned osseointegrated implants at the sinus floor                                                                   | Man Y.; Wang T.; Mo A.; Qu Y.                                                                                                              | 2014 |
| Rare case of leptomeningeal carcinomatosis without evidence of brain metastasis presenting as first sign of recurrent NSCLC                                                         | Lowe D.; Sinha S.; Kahlon A.                                                                                                               | 2014 |
| A unique conjoined orbital and maxillary removable "Bottle opener" prosthesis for hemi-maxillectomy defect with orbital exenteration                                                | Kusanale A.; Silk H.; Aldridge T.; Ilankovan V.                                                                                            | 2014 |
| Reducing joint failure in total temporomandibular joint replacement: A survey of UK surgeons and preliminary data for national guidelines                                           | Richardson S.; Saeed N.                                                                                                                    | 2014 |
| The value of myocardial perfusion imaging in predicting cardiac events and hospital length of stay in abdominal aortic aneurysm repair                                              | Ratcliffe Law T.; Fludder V.; Dizdarevic S.; Singh N.; Yusuf S.; Thorburn P.                                                               | 2014 |
| Haemodynamic performance and early safety after rapid deployment aortic valve replacement: Real-world outcomes of 512 patients                                                      | Laufer G.; Kocher A.; Cassese M.; Alamanni F.; Holzinger C.; Young C.P.; Duhay F.G.; Glauber M.                                            | 2014 |
| Can intra-vesical mitomycin-c hyperthermia challenge radical cystectomy as standard of care in the management of high-risk non-muscle invasive bladder cancer?                      | Nair R.; Pai A.; Ayres B.; Bailey M.; Perry M.; Issa R.                                                                                    | 2014 |
| Procedural alterations in oxidative, and nitrosative stress parameters in patients undergoing percutaneous coronary interventions                                                   | Gelişen R.; Erman H.; İkitimur B.; Çakmak H.A.; Sözer V.; Korkmaz G.; Karadağ B.; Şimşek G.; Öngen Z.; Uzun H.                             | 2014 |
| Analytic morphomics identifies predictors of new-onset diabetes after transplantation                                                                                               | Vaughn-Sandler V.; Cron D.C.; Terjimanian M.; Gala Z.; Wang S.C.; Su G.L.; Volk M.                                                         | 2014 |
| Bleeding outcomes after non-emergency percutaneous coronary intervention in the elderly                                                                                             | Boganasanmugam V.; Psaltis P.; Rashid H.; Meredith I.; Malaiapan Y.                                                                        | 2014 |
| Obsessive-compulsive symptoms in a population-based birth cohort, and their association with level of functioning                                                                   | Werbeloff N.; Dohrenwend B.P.; Levav I.; Weiser M.                                                                                         | 2014 |
| Costs of peri-procedural complications among patients treated with a self-expanding transcatheter aortic valve prosthesis: Results from the corevalve us pivotal extreme risk study | Baron S.J.; Arnold S.V.; Reynolds M.R.; Lei Y.; Magnuson E.; Byrne T.J.; Bajwa T.; O'Hair D.; Adams D.; Popma J.; Cohen D.                 | 2014 |
| Evaluation of protein markers of oral cavity biological fluids in immediate dental implantation                                                                                     | Bazikyan E.; Vavilova T.; Savich O.; Labis V.                                                                                              | 2014 |
| Inter-rater agreement in the diagnosis of mucositis and peri-implantitis                                                                                                            | Merli M.; Bernardelli F.; Giulianelli E.; Toselli I.; Moscatelli M.; Pagliaro U.; Nieri M.                                                 | 2014 |
| Does the number of implants have any relation with peri-implant disease?                                                                                                            | Passoni B.B.; Dalago H.R.; Schuldt Filho G.; Oliveira de Souza J.G.; Benfatti C.A.; Magini R.d.e S.; Bianchini M.A.                        | 2014 |
| Long-term follow-up of simultaneous guided bone regeneration using native and cross-linked collagen membranes over 6 years                                                          | Schwarz F.; Hegewald A.; Sahm N.; Becker J.                                                                                                | 2014 |
| Dental implants: A good treatment option in patients with Sjögren's syndrome                                                                                                        | Korfage A.; Raghoobar G.M.; Arends S.; Meiners P.M.; Visser A.; Kroese F.G.M.; Bootsma H.; Vissink A.                                      | 2014 |
| Influence of crown/implant ratio on marginal bone loss: a systematic review                                                                                                         | Garaicoa-Pazmiño C.; Suárez-López del Amo F.; Monje A.; Catena A.; Ortega-Oller I.; Galindo-Moreno P.; Wang H.-L.                          | 2014 |
| Tissue stability of implants placed in fresh extraction sockets: a 5-year prospective single-cohort study                                                                           | Covani U.; Canullo L.; Toti P.; Alfonsi F.; Barone A.                                                                                      | 2014 |
| Prevention and treatment of periodontal diseases in primary care                                                                                                                    | Matthews D.C.                                                                                                                              | 2014 |
| Platform switching minimises crestal bone loss around dental implants: truth or myth?                                                                                               | Romanos G.E.; Javed F.                                                                                                                     | 2014 |

|                                                                                                                                                                                                          |                                                                                                                            |      |
|----------------------------------------------------------------------------------------------------------------------------------------------------------------------------------------------------------|----------------------------------------------------------------------------------------------------------------------------|------|
| Manage patients in peri-implant health                                                                                                                                                                   | Hernandez M.                                                                                                               | 2014 |
| Single crowns in the resorbed posterior maxilla supported by either 6-mm implants or by 11-mm implants combined with sinus floor elevation surgery: a 1-year randomised controlled trial                 | Guljé F.L.; Raghoobar G.M.; Vissink A.; Meijer H.J.                                                                        | 2014 |
| Immediate loading of implants placed in patients with untreated periodontal disease: a 5-year prospective cohort study                                                                                   | Maló P.; Nobre Md.e A.; Lopes A.; Ferro A.; Gravito I.                                                                     | 2014 |
| Management of the ailing implant: An innovative technique for the treatment of labial gingival recession around dental implants                                                                          | Le B.T.; Borzabadi-Farahani A.; Nielsen B.                                                                                 | 2014 |
| Peri-implantitis. Part 1: Scope of the problem                                                                                                                                                           | Alani A.; Kelleher M.; Bishop K.                                                                                           | 2014 |
| Clinical outcomes of dental implant therapy in alveolar cleft patients: a systematic review                                                                                                              | Wang F.; Wu Y.; Zou D.; Wang G.; Kaigler D.                                                                                | 2014 |
| Strain distribution of immediately loaded implants with fixed prosthesis using the "all-on-four" protocol in the edentulous mandible: Nonlinear three-dimensional finite element analysis                | Horita S.; Sugiyama T.; Yamamoto K.; Kawakami M.; Murakami K.; Kirita T.                                                   | 2014 |
| Cone beam computed tomographic evaluation of implants with platform-switched Morse taper connection with the implant-abutment interface at different levels in relation to the alveolar crest            | Koutouzis T.; Neiva R.; Nair M.; Nonhoff J.; Lundgren T.                                                                   | 2014 |
| A simplified pocket reduction procedure around a stud attachment without suturing                                                                                                                        | Lee J.-H.; Sohn D.-S.; Cho J.-H.                                                                                           | 2014 |
| Influence of presence or absence of keratinized mucosa on the alveolar bony crest level as it relates to different buccal marginal bone thicknesses. An experimental study in dogs                       | Bengazi F.; Botticelli D.; Favero V.; Perini A.; Urbizo Velez J.; Lang N.P.                                                | 2014 |
| Patient-based and clinical outcomes of implant telescopic attachment-retained mandibular overdentures: a 1-year longitudinal prospective study                                                           | Yunus N.; Saub R.; Taiyeb Ali T.B.; Salleh N.M.; Baig M.R.                                                                 | 2014 |
| The effects of off-axial loading on periimplant marginal bone loss in a single implant                                                                                                                   | Lee D.-W.; Park K.-H.; Moon I.-S.                                                                                          | 2014 |
| Computer-guided versus free-hand placement of immediately loaded dental implants: 1-year post-loading results of a multicentre randomised controlled trial                                               | Pozzi A.; Tallarico M.; Marchetti M.; Scarfò B.; Esposito M.                                                               | 2014 |
| Mandibular osteomyelitis following explantation of a peri-implanter infected blade implant                                                                                                               | Ofloğlu D.; Ergun S.; Olgaç V.; Tanyeri H.                                                                                 | 2014 |
| HIFU                                                                                                                                                                                                     | Napoli A.                                                                                                                  | 2014 |
| Patency vs. clinical success of revascularisation                                                                                                                                                        | Spiliopoulos S.                                                                                                            | 2014 |
| Dental care providers' decision making regarding maintenance of compromised teeth and implant therapy indication: an analysis of gender and enrollment in teaching positions                             | Junges R.; Zitzmann N.U.; Walter C.; Rösing C.K.                                                                           | 2014 |
| IR relevant sedation and analgesia techniques                                                                                                                                                            | Vari A.                                                                                                                    | 2014 |
| Post-interventional patient management                                                                                                                                                                   | Cleveland T.J.                                                                                                             | 2014 |
| High FSH level increase endometrial atrophy through cross-talk with TGF beta signal transduction pathway in post-menopause women                                                                         | Li J.; Zhang D.; Xu G.; Chen L.; Qian Y.; Liu Y.; Zhou C.; Huang H.                                                        | 2014 |
| A meta-analysis of non-compliance or planned discontinuation of aspirin and the risk of mortality and non-fatal myocardial infarction in patients with established or at risk of coronary artery disease | Luni F.K.; Riaz H.; Riaz I.B.; Riaz T.; Husnain M.; Khan S.; Cooper C.                                                     | 2014 |
| Indications for carotid artery stenting-patient triage                                                                                                                                                   | Cleveland T.J.                                                                                                             | 2014 |
| High-frequency loading positively impacts titanium implant osseointegration in impaired bone                                                                                                             | Chatterjee M.; Hatori K.; Duyck J.; Sasaki K.; Naert I.; Vandamme K.                                                       | 2014 |
| First steps in using machine learning on fMRI data to predict intrusive memories of traumatic film footage                                                                                               | Clark I.A.; Niehaus K.E.; Duff E.P.; Di Simplicio M.C.; Clifford G.D.; Smith S.M.; Mackay C.E.; Woolrich M.W.; Holmes E.A. | 2014 |
| Collagen-functionalised titanium surfaces for biological sealing of dental implants: Effect of immobilisation process on fibroblasts response                                                            | Marín-Pareja N.; Salvagni E.; Guillem-Martí J.; Aparicio C.; Ginebra M.-P.                                                 | 2014 |
| Comparison of peri-implant crevicular fluid levels of adrenomedullin and human beta defensins 1 and 2 from mandibular implants with different implant stability quotient levels in nonsmoker patients    | Ertugrul A.S.; Tekin Y.; Alpaslan N.Z.; Bozoglan A.; Sahin H.; Dikilitas A.                                                | 2014 |
| Survival and complication rates of fixed restorations supported by locking-taper implants: a prospective study with 1 to 10 years of follow-up                                                           | Mangano F.; Macchi A.; Caprioglio A.; Sammons R.L.; Piattelli A.; Mangano C.                                               | 2014 |
| Periodontal stress-Cellular and molecular aspects                                                                                                                                                        | Gotz W.                                                                                                                    | 2014 |
| Influence of Implant transmucosal design on early peri-implant tissue responses in beagle dogs                                                                                                           | Huh J.-B.; Rheu G.-B.; Kim Y.-S.; Jeong C.-M.; Lee J.-Y.; Shin S.-W.                                                       | 2014 |
| The extremely resorbed mandible, 10-year results of a randomized controlled trial on 3 treatment strategies                                                                                              | Stellingsma K.; Raghoobar G.M.; Visser A.; Vissink A.; Meijer H.J.                                                         | 2014 |
| Clinical investigation on axial versus tilted implants for immediate fixed rehabilitation of edentulous arches: preliminary results of a single cohort study                                             | Agnini A.; Agnini A.M.; Romeo D.; Chiesi M.; Pariente L.; Stappert C.F.                                                    | 2014 |
| Implant treatment choice after extraction of a vertically fractured tooth. A proposal for a clinical classification of bony defects based on a systematic review of literature                           | Corbella S.; Taschieri S.; Samaranayake L.; Tsesis I.; Nemcovsky C.; Del Fabbro M.                                         | 2014 |
| Failed dental implants: diagnosis, removal and survival of reimplantations                                                                                                                               | Greenstein G.; Cavallaro J.                                                                                                | 2014 |

|                                                                                                                                                                                    |                                                                                                              |      |
|------------------------------------------------------------------------------------------------------------------------------------------------------------------------------------|--------------------------------------------------------------------------------------------------------------|------|
| Impact of immediate loading on early soft tissue healing at two-piece implants placed in fresh extraction sockets: an experimental study in the beagle dog                         | Mareque S.; Liñares A.; Pérez J.; Muñoz F.; Ramos I.; Blanco J.                                              | 2014 |
| Long-term evaluation of immediately loaded implants in the edentulous mandible using fixed bridges and platform shifting                                                           | Romanos G.E.; Gaertner K.; Nentwig G.H.                                                                      | 2014 |
| Influence of platform switching on periimplant bone loss: a systematic review and meta-analysis                                                                                    | Herekar M.; Sethi M.; Mulani S.; Fernandes A.; Kulkarni H.                                                   | 2014 |
| Comparison of functional outcomes with purely laparoscopic sacrocolpopexy and robot-assisted sacrocolpopexy in obese women                                                         | Thubert T.; Deffieux X.; Villefranque V.; Panel P.; Lefranc J.; Vaessen C.; Chartier-Kastler E.; Roupêt M.   | 2014 |
| Interventions for replacing missing teeth: Different types of dental implants                                                                                                      | Esposito M.; Ardebili Y.; Worthington H.V.                                                                   | 2014 |
| Neutrophil-gelatinase associated lipocalin (N-GAL) to assess perioperative acute kidney injury in minimal access donor nephrectomy: A pilot study                                  | Aitken E.; Vesey A.; Glen J.; Steven M.; Clancy M.                                                           | 2014 |
| Predictors of functional status at discharge after medical intensive care unit admission among patients with lung transplantation                                                  | Banga A.; Budev M.; Sasidhar M.                                                                              | 2014 |
| Clinical and radiographic outcomes of a combined resective and regenerative approach in the treatment of peri-implantitis: a prospective case series                               | Matarasso S.; Iorio Siciliano V.; Aglietta M.; Andreuccetti G.; Salvi G.E.                                   | 2014 |
| Mucosal inflammation and incidence of crestal bone loss among implant patients: a 10-year study                                                                                    | Cecchinato D.; Parpaiola A.; Lindhe J.                                                                       | 2014 |
| Prosthetic resolution of peri-implant mucositis: promoting soft-tissue health through proper restorative design                                                                    | Azar D.E.                                                                                                    | 2014 |
| Cement-associated peri-implantitis: a retrospective clinical observational study of fixed implant-supported restorations using a methacrylate cement                               | Korsch M.; Obst U.; Walther W.                                                                               | 2014 |
| Use of Er:YAG laser to decontaminate infected dental implant surface in preparation for reestablishment of bone-to-implant contact                                                 | Nevins M.; Nevins M.L.; Yamamoto A.; Yoshino T.; Ono Y.; Wang C.-W.; Kim D.M.                                | 2014 |
| Clinical, microbiological, and salivary biomarker profiles of dental implant patients with type 2 diabetes                                                                         | Tatarakis N.; Kinney J.S.; Inglehart M.; Braun T.M.; Shelburne C.; Lang N.P.; Giannobile W.V.; Oh T.-J.      | 2014 |
| Immediate placement of dental implants in the esthetic zone: a systematic review and pooled analysis                                                                               | Slagter K.W.; den Hartog L.; Bakker N.A.; Vissink A.; Meijer H.J.; Raghoobar G.M.                            | 2014 |
| Prognosis of implants and abutment teeth under combined tooth-implant-supported and solely implant-supported double-crown-retained removable dental prostheses                     | Rammelsberg P.; Bernhart G.; Lorenzo Bermejo J.; Schmitter M.; Schwarz S.                                    | 2014 |
| Atraumatic extraction, implant placement and immediate provisionalization                                                                                                          | Tavarez R.R.; Calixto A.M.; Maia Filho E.M.; Bandeca M.C.; Firoozmand L.M.; Gomes M.G.; Malheiros A.S.       | 2014 |
| Influence of implant framework and mandibular flexure on the strain distribution on a Kennedy class II mandible restored with a long-span implant fixed restoration: a pilot study | Law C.; Bennani V.; Lyons K.; Swain M.                                                                       | 2014 |
| An innovative multidisciplinary approach to urogynecology clinical care                                                                                                            | Schulz J.A.; Ding J.; Flood C.G.; Tyrrell J.; Janes-Kelley S.                                                | 2014 |
| Using botulinum a toxin for hyperhidrosis as an adjunct treatment in wound care                                                                                                    | Punj V.; Ota D.; Flavin K.                                                                                   | 2014 |
| Mid-and long term efficacy and safety of retropubic TVT and TVT-O: Analysis of the literature                                                                                      | Tommaselli G.A.; Fabozzi A.; Formisano C.; Di Carlo C.; Nappi C.                                             | 2014 |
| Incidence and predictors of permanent pacemaker implantation after valve surgery-A single centre experience                                                                        | Ayub B.; Nawaz Y.; Saif H.; Guthrie J.; Weiss M.; Phillips T.; Wu J.; Singer R.; Freudenberg R.; Malacoff R. | 2014 |
| Rotating titanium brush for plaque removal from rough titanium surfaces--an in vitro study                                                                                         | John G.; Becker J.; Schwarz F.                                                                               | 2014 |
| Co-development of pyogenic granuloma and capillary hemangioma on the alveolar ridge associated with a dental implant: A case report                                                | Kang Y.-H.; Byun J.-H.; Choi M.-J.; Lee J.-S.; Jang J.-H.; Kim Y.-I.; Park B.-W.                             | 2014 |
| Management of peri-implant disease: a current appraisal                                                                                                                            | Mishler O.P.; Shiau H.J.                                                                                     | 2014 |
| A 10-year retrospective analysis of clinical results of implant-retained/supported prostheses in full edentulous patients                                                          | Hu X.; Luo J.; Li J.; Qiu L.; Di P.; Lin Y.                                                                  | 2014 |
| Adverse events related to dental implants                                                                                                                                          | Pigatto P.D.; Ronchi A.; Brambilla L.; Ferrucci S.M.; Spadari F.; Passoni M.; Bombeccari G.P.; Guzzi G.      | 2014 |
| Crestal bone changes at teeth and implants in periodontally healthy and periodontally compromised patients. A 10-year comparative case-series study                                | Rasperini G.; Siciliano V.I.; Cafiero C.; Salvi G.E.; Blasi A.; Aglietta M.                                  | 2014 |
| Fractal analysis of ibuprofen effect on experimental dog peri-implantitis                                                                                                          | Pârvu A.E.; Tălu S.; Taulescu M.A.; Bota A.; Cătoi F.; Crăciun C.; Alb C.; Pârvu O.; Alb S.F.                | 2014 |
| Scale                                                                                                                                                                              | Volchansky A.                                                                                                | 2014 |
| Insufficient irrigation induces peri-implant bone resorption: an in vivo histologic analysis in sheep                                                                              | Trisi P.; Berardini M.; Falco A.; Podaliri Vulpiani M.; Perfetti G.                                          | 2014 |
| Associations of clinical characteristics and interval between maintenance visits with peri-implant pathology                                                                       | de Araújo Nobre M.A.; Maló P.S.; Oliveira S.H.                                                               | 2014 |
| Surgical treatment of buccal soft tissue recessions around single implants: 1-year results from a prospective pilot study                                                          | Roccuzzo M.; Gaudioso L.; Bunino M.; Dalmaso P.                                                              | 2014 |
| Effect of metformin on periimplant wound healing in a rat model of type 2 diabetes                                                                                                 | Inouye K.A.; Bisch F.C.; Elsalanty M.E.; Zakhary I.; Khashaba R.M.; Borke J.L.                               | 2014 |
| Preparation and anti-bacterial tests of silver-modified titanium surface                                                                                                           | Liao J.; Fei W.; Guo J.; Li P.                                                                               | 2014 |
| Clinical performance of a highly porous beta-TCP as the grafting material for maxillary sinus augmentation                                                                         | Bettach R.; Guillaume B.; Taschieri S.; Del Fabbro M.                                                        | 2014 |

|                                                                                                                                                                                                           |                                                                                                                                                                                         |      |
|-----------------------------------------------------------------------------------------------------------------------------------------------------------------------------------------------------------|-----------------------------------------------------------------------------------------------------------------------------------------------------------------------------------------|------|
| Comparative analysis of the faults, complications, follow up in patients with wide spectrum for rheumatic diseases attached to total hip replacement                                                      | Pavlov V.P.; Makarov S.A.                                                                                                                                                               | 2014 |
| Immunisation and general anaesthesia-audit of practice in a specialist paediatric hospital                                                                                                                | Lonsdale H.; Sivaprakasam J.                                                                                                                                                            | 2014 |
| NHSN definitions: Worksheets that work                                                                                                                                                                    | Pruden J.; Tomlin K.; Hessels A.; Young-Ruckriegel C.; Marek M.; De Chirico V.; Desai B.; Mayo J.                                                                                       | 2014 |
| Determining Evidence-Based Practice for Site Care: Consensus and Guidelines for CVADs                                                                                                                     | Broadhurst D.; Moureau N.                                                                                                                                                               | 2014 |
| Long-term analysis of osseointegrated implants in non-smoker patients with a previous history of periodontitis                                                                                            | Meyle J.; Gersok G.; Boedeker R.-H.; Gonzales J.R.                                                                                                                                      | 2014 |
| The case for routine maintenance of dental implants                                                                                                                                                       | Wilson T.G.; Valderrama P.; Rodrigues D.B.                                                                                                                                              | 2014 |
| OHRQoL, masticatory performance and crestal bone loss with single-implant, magnet-retained mandibular overdentures with conventional and shortened dental arch                                            | Grover M.; Vaidyanathan A.K.; Veeravalli P.T.                                                                                                                                           | 2014 |
| Computer-assisted flapless implant surgery in edentulous elderly patients: a 2-year follow up                                                                                                             | di Torresanto V.M.; Milinkovic I.; Torsello F.; Cordaro L.                                                                                                                              | 2014 |
| A comparison between 4 and 6 implants in the maxillary posterior region to support an overdenture; 1-year results from a randomized controlled trial                                                      | Slot W.; Raghoobar G.M.; Vissink A.; Meijer H.J.                                                                                                                                        | 2014 |
| Intraoral use of extraoral implants for oral rehabilitation of a pediatric patient after resection of ewing sarcoma of the mandible and reconstruction with iliac osteocutaneous free flap                | Aksu A.E.; Dursun E.; Calis M.; Ersu B.; Safak T.; Tözüm T.F.                                                                                                                           | 2014 |
| Controversies on hormonal contraception in adolescence and bone metabolism                                                                                                                                | Valdoleiros S.; Gonc,alves A.; Antunes I.; Martins I.; Palma F.                                                                                                                         | 2014 |
| Crossing of infra-inguinal peripheral arterial chronic total occlusion with viance™ blunt microdissection catheter                                                                                        | Sarode K.; Raffoul J.; Thomas R.; Mohammad A.; Hadidi O.; Baig M.S.; Mody P.; Gigliotti O.S.; Klein A.; Ishti Ali M.; Abu-Fadel M.; Shammam N.W.; Prasad A.; Brilakis E.S.; Banerjee S. | 2014 |
| A review of the resuscitation training and equipment in a UK hospital without a Resuscitation Officer                                                                                                     | Scott K.; Staber M.                                                                                                                                                                     | 2014 |
| Barriers to early discharge after elective percutaneous coronary intervention: A single-center study                                                                                                      | Graziano F.; Wohns D.; Robinett D.; Busman D.; Muthusamy P.; Banga S.                                                                                                                   | 2014 |
| Factors related to peri-implantitis - a retrospective study                                                                                                                                               | Renvert S.; Aghazadeh A.; Hallström H.; Persson G.R.                                                                                                                                    | 2014 |
| The influence of initial soft tissue thickness on peri-implant bone remodeling                                                                                                                            | Vervaeke S.; Dierens M.; Besseler J.; De Bruyn H.                                                                                                                                       | 2014 |
| Is keratinized mucosa indispensable to maintain peri-implant health? A systematic review of the literature                                                                                                | Brito C.; Tenenbaum H.C.; Wong B.K.C.; Schmitt C.; Nogueira-Filho G.                                                                                                                    | 2014 |
| Long-term results for maxillary rehabilitation with dental implants after tumor resection                                                                                                                 | Huang W.; Wu Y.; Zou D.; Zhang Z.; Zhang C.; Sun J.; Xu B.; Zhang Z.                                                                                                                    | 2014 |
| Mini-invasive osteotome sinus floor elevation in partially edentulous atrophic maxilla using reduced length dental implants: interim results of a prospective study                                       | Taschieri S.; Corbella S.; Del Fabbro M.                                                                                                                                                | 2014 |
| Efficacy of two antibiotic regimens in the reduction of early dental implant failure: A pilot study                                                                                                       | El-Kholey K.E.                                                                                                                                                                          | 2014 |
| Soft tissue wound healing around teeth and dental implants                                                                                                                                                | Sculean A.; Gruber R.; Bosshardt D.D.                                                                                                                                                   | 2014 |
| Flap approaches in plastic periodontal and implant surgery: critical elements in design and execution                                                                                                     | de Sanctis M.; Clementini M.                                                                                                                                                            | 2014 |
| Predicting peri-operative right heart failure, post-implant survival and timing of mechanical ventricular assistance                                                                                      | Harb M.; Lui R.; Robson D.; Jabbour A.; Kotlyar E.; Keogh A.; Granger E.; Spratt P.; Macdonald P.S.; Jansz P.; Hayward C.S.; Dhital K.                                                  | 2014 |
| Renal impairment post vad implantation in patients with normal pre-operative renal function                                                                                                               | Lui R.; Harb M.; Anthony C.; Robson D.; Sevastos J.; Granger E.; Hayward C.S.; Jabbour A.; Spratt P.M.; Keogh A.M.; Kotlyar E.; Macdonald P.; Janz P.; Dhital K.                        | 2014 |
| Pre-emptive ID specialist consultation reduces MCS drive line infections                                                                                                                                  | Hadi A.; Hellman Y.; Gradus-Pizlo I.; Malik A.; Caccamo M.; Wozniak T.; Hashmi Z.; Wang I.; Pickrell J.                                                                                 | 2014 |
| United Kingdom national database study of intravitreal dexamethasone implant (Ozurdex®) for retinal vein occlusion related macular oedema. Patients' pretreatment characteristics and treatment procedure | Sallam A.A.I.; Zarranz-Ventura J.; Mohamed Q.; Johnston R.                                                                                                                              | 2014 |
| Contemporary comparison between retropubic mid urethral sling (MUS) and autologous pubovaginal sling (PVS) for stress urinary incontinence (SUI) after the fda advisory warning                           | Mock S.; Angelle J.; Reynolds W.S.; Osborn D.J.; Dmochowski R.R.; Gomelsky A.                                                                                                           | 2014 |
| Anchoring heuristics in diagnosis                                                                                                                                                                         | Ukaigwe A.; Espana-Schmidt C.                                                                                                                                                           | 2014 |
| Partial versus radical nephrectomy for T1 renal tumours: An analysis from the British Association of Urological Surgeons Nephrectomy Audit                                                                | Hadjipavlou M.; Khan F.; Fowler S.; Keeley F.X.; Sriprasad S.                                                                                                                           | 2014 |
| Peri-implant conditions and their relationship with periodontal conditions in Chinese patients: a cross-sectional study                                                                                   | Wang R.; Zhao W.; Tang Z.H.; Jin L.J.; Cao C.F.                                                                                                                                         | 2014 |
| Evaluation of a variable-thread tapered implant in extraction sites with immediate temporization: a 3-year multicenter clinical study                                                                     | Kolinski M.L.; Cherry J.E.; McAllister B.S.; Parrish K.D.; Pumphrey D.W.; Schroering R.L.                                                                                               | 2014 |
| Minimally invasive transcresal sinus floor elevation with deproteinized bovine bone or $\beta$ -tricalcium phosphate: a multicenter, double-blind, randomized, controlled clinical trial                  | Trombelli L.; Franceschetti G.; Stacchi C.; Minenna L.; Riccardi O.; Di Raimondo R.; Rizzi A.; Farina R.                                                                                | 2014 |
| Peri-implant outcome of immediately loaded implants with a full-arch implant fixed denture: a 5-year prospective case series                                                                              | Martens F.; Vandeweghe S.; Browaeys H.; De Bruyn H.                                                                                                                                     | 2014 |

|                                                                                                                                                                                                                                                         |                                                                                                                                 |      |
|---------------------------------------------------------------------------------------------------------------------------------------------------------------------------------------------------------------------------------------------------------|---------------------------------------------------------------------------------------------------------------------------------|------|
| Is a grooved collar implant design superior to a machined design regarding bone level alteration? An observational pilot study                                                                                                                          | Bassetti R.; Kaufmann R.; Ebinger A.; Mericske-Stern R.; Enkling N.                                                             | 2014 |
| Systemic risk factors for peri-implant bone loss: A systematic review and meta-analysis                                                                                                                                                                 | Clementini M.; Rossetti P.H.O.; Penarrocha D.; Micarelli C.; Bonachela W.C.; Canullo L.                                         | 2014 |
| Implant-prosthetic patient: Hygienic maintenance and occlusal control                                                                                                                                                                                   | Montaruli G.; Paparusso M.                                                                                                      | 2014 |
| Crestal bone reactions to immediate implants placed at different levels in relation to crestal bone. A pilot study in Foxhound dogs                                                                                                                     | Calvo-Guirado J.L.; Boquete-Castro A.; Negri B.; Delgado Ruiz R.; Gómez-Moreno G.; Iezzi G.                                     | 2014 |
| Reconstruction of the edentulous mandible with fresh frozen bone grafts and implants: a 4-year report of a prospective clinical study                                                                                                                   | Pimentel A.C.; Napimoga M.H.; Manzi M.R.; Sendyk W.R.                                                                           | 2014 |
| The current status of bridging anticoagulation                                                                                                                                                                                                          | Patel J.P.; Arya R.                                                                                                             | 2014 |
| Management of portal and mesenteric vein stenosis after pancreaticoduodenectomy with endovascular stent placement                                                                                                                                       | Ferral H.; Alonzo M.; Talamonti M.                                                                                              | 2014 |
| Establishing chronic total occlusion programme in a tertiary Australian centre -description of early experience                                                                                                                                         | Shanmugam V.B.; Wong D.; Psaltis P.; Seneviratne S.; Meredith I.; Malaipayan Y.                                                 | 2014 |
| Monitoring of adverse reactions to DePuy ASR devices in patients with metal-on-metal hip arthroplasty                                                                                                                                                   | Rodríguezde La Flor Garcia M.; Ramos Aparicio R.; Puente MartíNez C.P.; Hernández Vaquero D.                                    | 2014 |
| High Prevalence of Undiagnosed Cryptococcus at HIV Diagnosis Across the CD4 Spectrum in Durban                                                                                                                                                          | Drain P. K.; Kleene J. M.; Losina E.; Coleman S. M.; Giddy J.; Ross D.; Katz J.; Walensky R. P.; Freedberg K. A.; Bassett I. V. | 2014 |
| Functional and morphological changes following Whipple's pancreaticoduodenectomy for periampullary carcinoma                                                                                                                                            | Saluja S.S.; Godhi S.; Mishra P.K.; Patil N.; Ramaswamy D.                                                                      | 2014 |
| Peri-interventional Subarachnoid Hemorrhage During Mechanical Thrombectomy with stent retrievers in Acute Stroke: A Retrospective Case-Control Study                                                                                                    | Yilmaz U.; Walter S.; Körner H.; Papanagiotou P.; Roth C.; Simgen A.; Behnke S.; Ragoschke-Schumm A.; Fassbender K.; Reith W.   | 2015 |
| Peri-implantitis induced by a retained retraction cord                                                                                                                                                                                                  | Salem D.; Alshihri A.; Levin L.                                                                                                 | 2014 |
| Evaluation of clinical outcomes and bone loss around titanium implants with oxidized surface: six-year follow-up results from a prospective case series study                                                                                           | Francetti L.; Azzola F.; Corbella S.; Taschieri S.; Del Fabbro M.                                                               | 2014 |
| Dental implants in patients with oral lichen planus: a cross-sectional study                                                                                                                                                                            | López-Jornet P.; Camacho-Alonso F.; Sánchez-Siles M.                                                                            | 2014 |
| Implant periapical lesion: A case-report and medicolegal considerations                                                                                                                                                                                 | Zangari F.                                                                                                                      | 2014 |
| Impact of platform switching on peri-implant bone remodeling around short implants in the posterior region, 1-year results from a split-mouth clinical trial                                                                                            | Telleman G.; Raghoobar G.M.; Vissink A.; Meijer H.J.                                                                            | 2014 |
| Nonsurgical management of inflammatory periimplant disease caused by food impaction: a clinical report                                                                                                                                                  | Bidra A.S.                                                                                                                      | 2014 |
| A randomized controlled clinical multicenter trial comparing the clinical and histological performance of a new, modified polylactide-co-glycolide acid membrane to an expanded polytetrafluoroethylene membrane in guided bone regeneration procedures | Schneider D.; Weber F.E.; Grunder U.; Andreoni C.; Burkhardt R.; Jung R.E.                                                      | 2014 |
| Interventions for edentate elders--what is the evidence?                                                                                                                                                                                                | Müller F.                                                                                                                       | 2014 |
| Immediate vs. early loading of SLA implants in the posterior mandible: 5-year results of randomized controlled clinical trial                                                                                                                           | Kokovic V.; Jung R.; Feloutzis A.; Todorovic V.S.; Jurisic M.; Hämmerle C.H.                                                    | 2014 |
| Maxillary sinus floor elevation surgery with BioOss® mixed with a bone marrow concentrate or autogenous bone: Test of principle on implant survival and clinical performance                                                                            | Rickert D.; Vissink A.; Slot W.J.; Sauerbier S.; Meijer H.J.A.; Raghoobar G.M.                                                  | 2014 |
| The impact of cantilevers on biological and technical success outcomes of implant-supported fixed partial dentures. A retrospective cohort study                                                                                                        | Kim P.; Ivanovski S.; Latcham N.; Mattheos N.                                                                                   | 2014 |
| Influence of crown-implant ratio on implant success rates and crestal bone levels: a 36-month follow-up prospective study                                                                                                                               | Malchiodi L.; Cucchi A.; Ghensi P.; Consonni D.; Nocini P.F.                                                                    | 2014 |
| The effect of opposing structures, natural teeth vs. implants on crestal bone levels surrounding single-tooth implants                                                                                                                                  | Urdaneta R.A.; Leary J.; Panetta K.M.; Chuang S.-K.                                                                             | 2014 |
| Maintenance of marginal bone support and soft tissue esthetics at immediately provisionalized OsseoSpeed implants placed into extraction sites: 2-year results                                                                                          | Noelken R.; Neffe B.A.; Kunkel M.; Wagner W.                                                                                    | 2014 |
| Implants in reconstructed bone: a comparative study on the outcome of Straumann® tissue level and bone level implants placed in vertically deficient alveolar ridges treated by means of autogenous onlay bone grafts                                   | Chiapasco M.; Casentini P.; Zaniboni M.                                                                                         | 2014 |
| Microcalorimetric determination of the effects of amoxicillin, metronidazole, and their combination on in vitro biofilm                                                                                                                                 | Astasov-Frauenhoffer M.; Braissant O.; Hauser-Gerspach I.; Weiger R.; Walter C.; Zitzmann N.U.; Waltimo T.                      | 2014 |
| Stent length and GP2B/3A Inhibitor use but not eGFR predict periprocedural myocardial infarction in elective percutaneous coronary intervention                                                                                                         | Goh C.; Al-Fiadh A.; Clark D.; Farouque O.                                                                                      | 2014 |
| Contemporary comparison between retropubic mid urethral sling (MUS) and autologous pubovaginal sling (PVS) for stress urinary incontinence (SUI) after the FDA advisory warning                                                                         | Mock S.; Angelle J.; Reynolds W.S.; Osborn D.J.; Dmochowski R.R.; Gomelsky A.                                                   | 2014 |
| Single-incision mini-slings versus standard midurethral slings in surgical management of female stress urinary incontinence: An updated systematic review and meta-analysis of effectiveness and complications                                          | Mostafa A.; Lim C.P.; Hopper L.; Madhuvrata P.; Abdel-Fattah M.                                                                 | 2014 |
| Peri-implantitis: A review                                                                                                                                                                                                                              | Saini R.; Giri P.A.; Saini S.; Saini S.R.                                                                                       | 2014 |
| A retrospective 3- to 5-year study of the reconstruction of oral function using implant-supported prostheses in patients with hypohidrotic ectodermal dysplasia.                                                                                        | Zou D.; Wu Y.; Wang X.D.; Huang W.; Zhang Z.; Zhang Z.                                                                          | 2014 |

|                                                                                                                                                                                                |                                                                                                           |      |
|------------------------------------------------------------------------------------------------------------------------------------------------------------------------------------------------|-----------------------------------------------------------------------------------------------------------|------|
| The clinical outcome of dental implants placed through skin flaps                                                                                                                              | Li B.-H.; Byun S.-H.; Kim S.-M.; Lee J.-H.                                                                | 2014 |
| The effects of anti-infective preventive measures on the occurrence of biologic implant complications and implant loss: a systematic review.                                                   | Salvi G.E.; Zitzmann N.U.                                                                                 | 2014 |
| Biological implant complications and their management.                                                                                                                                         | Hsu Y.T.; Mason S.A.; Wang H.L.                                                                           | 2014 |
| Osseointegration and re-osseointegration                                                                                                                                                       | Meenakshi Priyanka V.; Ramamoorthy J.                                                                     | 2014 |
| Overdentures on primary mandibular implants in patients with oral cancer: A follow-up study over 14 years                                                                                      | Korfage A.; Raghoobar G.M.; Slater J.J.R.H.; Roodenburg J.L.N.; Witjes M.J.H.; Vissink A.; Reintsema H.   | 2014 |
| Single-blind randomized clinical trial to evaluate clinical and radiological outcomes after one year of immediate versus delayed implant placement supporting full-arch prostheses             | Pellicer-Chover H.; Peñarrocha-Oltra D.; Bagán L.; Fichy-Fernandez A.-J.; Canullo L.; Peñarrocha-Diogo M. | 2014 |
| Interleukin-17 in peri-implantitis: Bone protector or destroyer?                                                                                                                               | Liu B.; Song N.; Bu J.; Feng W.                                                                           | 2014 |
| Peri-implantitis diagnosis and treatment by New Zealand periodontists and oral maxillofacial surgeons.                                                                                         | Russell A.A.; Tawse-Smith A.; Broadbent J.M.; Leichter J.W.                                               | 2014 |
| Subcutaneous emphysema following non-surgical peri-implantitis therapy using an air abrasive device: a case report                                                                             | Basseti M.; Basseti R.; Sculean A.; Salvi G.E.                                                            | 2014 |
| Microbial analysis of biofilms on cement surfaces: An investigation in cement-associated peri-implantitis                                                                                      | Korsch M.; Walther W.; Marten S.-M.; Obst U.                                                              | 2014 |
| Immediate functional loading of single implants: a 1-year interim report of a 5-year prospective multicentre study.                                                                            | Luongo G.; Lenzi C.; Raes F.; Eccellente T.; Ortolani M.; Mangano C.                                      | 2014 |
| Radiographic bone level changes of implant-supported restorations in edentulous and partially dentate patients: 5-year results                                                                 | Gholami H.; Mericske-Stern R.; Kessler-Liechti G.; Katsoulis J.                                           | 2014 |
| Immediate versus early loading of mini-implants supporting mandibular overdentures: a preliminary 3-year clinical outcome report                                                               | Maryod W.H.; Ali S.M.; Shawky A.F.                                                                        | 2014 |
| Effects of Er,Cr:YSGG laser irradiation on the surface characteristics of titanium discs: An in vitro study                                                                                    | Ercan E.; Arin T.; Kara L.; Çandırli C.; Uysal C.                                                         | 2014 |
| Biomechanics and peri-implantitis: The effect of a subcrestal wing-thread to decrease alveolar crestal bone strain. theory, finite element analysis, and clinical application.                 | Laster Z.; Weissberg I.; Kablan F.                                                                        | 2014 |
| A two-stage surgical approach to the treatment of severe peri-implant defect: a 30-month clinical follow-up report.                                                                            | Kim J.E.; Kim H.Y.; Huh J.B.; Lee J.Y.; Shin S.W.                                                         | 2014 |
| Antibiotic resistance in human peri-implantitis microbiota                                                                                                                                     | Rams T.E.; Degener J.E.; van Winkelhoff A.J.                                                              | 2014 |
| Dental implants: Monitoring and hygiene are essential                                                                                                                                          | Buxeraud J.                                                                                               | 2014 |
| Evaluation of the influence of keratinized mucosa width on peri-implant soft and hard tissue health                                                                                            | Zhang Y.-X.; Shu R.; Xie Y.-F.                                                                            | 2014 |
| The association of clinical and microbiologic parameters with histologic observations in relatively healthy peri-implant conditions- a preliminary short-term in vivo study                    | van Brakel R.; Meijer G.J.; de Putter C.; Verhoeven J.W.; Jansen J.; Cune M.S.                            | 2014 |
| Three-year post-loading results of a randomised, controlled, split-mouth trial comparing implants with different prosthetic interfaces and design in partially posterior edentulous mandibles. | Pozzi A.; Tallarico M.; Moy P.K.                                                                          | 2014 |
| Saliva versus peri-implant inflammation: quantification of IL-1 $\beta$ in partially and totally edentulous patients.                                                                          | Rocha F.S.; Jesus R.N.; Rocha F.M.; Moura C.C.; Zanetta-Barbosa D.                                        | 2014 |
| Clinical and radiological evaluation of a template-guided (NobelGuide™) treatment concept                                                                                                      | Vasak C.; Kohal R.J.; Lettner S.; Rohner D.; Zechner W.                                                   | 2014 |
| Nanocrystalline hydroxyapatite-based material already contributes to implant stability after 3 months: a clinical and radiologic 3-year follow-up investigation.                               | Ghanaati S.; Lorenz J.; Obreja K.; Choukroun J.; Landes C.; Sader R.A.                                    | 2014 |
| Clinical study of flap design to increase the keratinized gingiva around implants: 4-year follow-up.                                                                                           | Bruschi G.B.; Crespi R.; Capparé P.; Gherlone E.                                                          | 2014 |
| Immediate loading of two flapless placed mandibular implants supporting cross-arch fixed prostheses: a 3-year follow-up prospective single cohort study.                                       | Cannizzaro G.; Felice P.; Boveri M.; Lazzarini M.; Ferri V.; Leone M.; Esposito M.                        | 2014 |
| Complications in implant dentistry.                                                                                                                                                            | Pi-Anfruns J.                                                                                             | 2014 |
| Immediately loaded distally cantilevered fixed mandibular prostheses supported by four implants placed in both in fresh extraction and healed sites: 2-year results from a prospective study.  | Krennmair S.; Seemann R.; Weinländer M.; Krennmair G.; Piehslinger E.                                     | 2014 |
| Esthetic outcomes following immediate and early implant placement in the anterior maxilla--a systematic review.                                                                                | Chen S.T.; Buser D.                                                                                       | 2014 |
| Loading protocols for single-implant crowns: a systematic review and meta-analysis.                                                                                                            | Benic G.I.; Mir-Mari J.; Hammerle C.H.                                                                    | 2014 |
| One abutment-one time versus a provisional abutment in immediately loaded post-extractive single implants: a 1-year follow-up of a multicentre randomised controlled trial.                    | Grandi T.; Guazzi P.; Samarani R.; Maghaireh H.; Grandi G.                                                | 2014 |
| Effects of acidic sodium fluoride-treated, commercially pure titanium on periodontal pathogens and rat bone marrow cells                                                                       | Shimogishi M.; Tsutsumi Y.; Kuroda S.; Munakata M.; Hanawa T.; Kasugai S.                                 | 2014 |
| The impact of a laser-microtextured collar on crestal bone level and clinical parameters under various placement and loading protocols.                                                        | Guarnieri R.; Serra M.; Bava L.; Grande M.; Farronato D.; Iorio-Siciliano V.                              | 2014 |
| In which direction will future clinical research go?                                                                                                                                           | Esposito M.                                                                                               | 2014 |
| A study of interleukin 1 $\beta$ levels in peri-miniscrew crevicular fluid (PMCF)                                                                                                              | Monga N.; Chaurasia S.; Kharbanda O.P.; Duggal R.; Rajeswari M.R.                                         | 2014 |

|                                                                                                                                                                                                                |                                                                                                                                         |      |
|----------------------------------------------------------------------------------------------------------------------------------------------------------------------------------------------------------------|-----------------------------------------------------------------------------------------------------------------------------------------|------|
| 1-stage versus 2-stage lateral sinus lift procedures: 1-year post-loading results of a multicentre randomised controlled trial.                                                                                | Felice P.; Pistilli R.; Piattelli M.; Soardi E.; Barausse C.; Esposito M.                                                               | 2014 |
| A short-term assessment of angulated abutments for the implant denture restorations in posterior teeth                                                                                                         | Feng W.; Geng J.-Y.; Sun Y.-Y.; Geng H.-X.                                                                                              | 2014 |
| Influence of occlusal loading on peri-implant clinical parameters. A pilot study                                                                                                                               | Pellicer-Chover H.; Viña-Almunia J.; Romero-Millán J.; Peñarrocha-Oltra D.; García-Mira B.; Peñarrocha-Diogo M.                         | 2014 |
| Immediate loading with fixed full-arch prostheses in the maxilla: Review of the literature                                                                                                                     | Peñarrocha-Oltra D.; Covani U.; Peñarrocha-Diogo M.; Peñarrocha-Diogo M.                                                                | 2014 |
| Clinical and radiologic experience with moderately rough oxidized titanium implants: up to 10 years of retrospective follow-up.                                                                                | Pozzi A.; Mura P.                                                                                                                       | 2014 |
| Soft tissue augmentation procedures for mucogingival defects in esthetic sites.                                                                                                                                | Levine R.A.; Huynh-Ba G.; Cochran D.L.                                                                                                  | 2014 |
| Comparison of two different abutment designs on marginal bone loss and soft tissue development.                                                                                                                | Patil R.C.; den Hartog L.; van Heereveld C.; Jagdale A.; Dilbaghi A.; Cune M.S.                                                         | 2014 |
| [Enlargement of keratinized peri-implant mucosa at the time of second stage surgery (re-entry)]                                                                                                                | Kaufmann R.; Bassetti R.; Mericske-Stern R.; Enkling N.                                                                                 | 2014 |
| Flapless dental implant surgery: a retrospective study of 1,241 consecutive implants.                                                                                                                          | Doan N.V.; Du Z.; Reher P.; Xiao Y.                                                                                                     | 2014 |
| Implant-retained overdentures for young children with severe oligodontia: A series of four cases                                                                                                               | Filius M.A.P.; Vissink A.; Raghoobar G.M.; Visser A.                                                                                    | 2014 |
| Efficacy and safety of a diode laser in second-stage implant surgery: A comparative study                                                                                                                      | El-Kholy K.E.                                                                                                                           | 2014 |
| Effects of currently available surgical and restorative interventions on reducing midfacial mucosal recession of immediately placed single-tooth implants: A systematic review                                 | Lin G.-H.; Chan H.-L.; Wang H.-L.                                                                                                       | 2014 |
| Immediate versus delayed loading of dental implants in edentulous patients' maxillae: a 6-year prospective study.                                                                                              | Tealdo T.; Menini M.; Bevilacqua M.; Pera F.; Pesce P.; Signori A.; Pera P.                                                             | 2014 |
| Animal models for craniofacial reconstruction by Stem/stromal cells                                                                                                                                            | Liu N.; Lyu X.; Fan H.; Shi J.; Hu J.; Luo E.                                                                                           | 2014 |
| Immediate, non-submerged, root-analogue direct laser metal sintering (DLMS) implants: A 1-year prospective study on 15 patients                                                                                | Mangano F.G.; De Franco M.; Caprioglio A.; MacChi A.; Piattelli A.; Mangano C.                                                          | 2014 |
| Correlation between interimplant distance and crestal bone loss in internal connection implants with platform switching.                                                                                       | Jo D.W.; Yi Y.J.; Kwon M.J.; Kim Y.K.                                                                                                   | 2014 |
| Prosthodontic management of maxillectomy patients with dental implants in residual zygomatic bone: a preliminary report                                                                                        | El-Sayed W.M.; Gad M.A.; Medra A.M.                                                                                                     | 2014 |
| The fate of marginal bone around axial vs. tilted implants: a systematic review.                                                                                                                               | Del Fabbro M.; Ceresoli V.                                                                                                              | 2014 |
| Conversion of an existing metal ceramic crown to an interim restoration and nonfunctional loading of a single implant in the maxillary esthetic zone: A clinical report                                        | Michalakis K.; Kalpidis C.D.R.; Hirayama H.                                                                                             | 2014 |
| Accuracy of peri-implant bone evaluation using cone beam CT, digital intra-oral radiographs and histology.                                                                                                     | Ritter L.; Elger M.C.; Rothamel D.; Fienitz T.; Zinser M.; Schwarz F.; Zöllner J.E.                                                     | 2014 |
| Consensus statements and clinical recommendations for prevention and management of biologic and technical implant complications.                                                                               | Heitz-Mayfield L.J.; Needleman I.; Salvi G.E.; Pjetursson B.E.                                                                          | 2014 |
| Anaplastic large-cell lymphoma associated with breast implants: A unique entity within the spectrum of peri-implant effusions                                                                                  | Chai S.M.; Kavangh S.; Ooi S.S.; Sterrett G.F.; Cull G.; Plunkett M.; Spagnolo D.; Amanuel B.; Joske D.; Leslie C.; Barham T.; Frost F. | 2014 |
| Combined surgical therapy of peri-implantitis                                                                                                                                                                  | Santoro G.; Masci A.; Scacchetti M.; Borgonovo A.                                                                                       | 2014 |
| Chondroitin sulfate and sulfated hyaluronan-containing collagen coatings of titanium implants influence peri-implant bone formation in a minipig model                                                         | Korn P.; Schulz M.C.; Hintze V.; Range U.; Mai R.; Eckelt U.; Schnabelrauch M.; Möller S.; Becher J.; Scharnweber D.; Stadlinger B.     | 2014 |
| Implant abutment connection: Biomechanical perspectives                                                                                                                                                        | Shetty M.; Krishna Prasad D.; Shetty N.H.G.; Jaiman R.                                                                                  | 2014 |
| Implant treatment in atrophic posterior mandibles: vertical regeneration with block bone grafts versus implants with 5.5-mm intrabony length.                                                                  | Peñarrocha-Oltra D.; Aloy-Prósper A.; Cervera-Ballester J.; Peñarrocha-Diogo M.; Canullo L.; Peñarrocha-Diogo M.                        | 2014 |
| Accuracy of CBCT images in the assessment of buccal marginal alveolar peri-implant defects: effect of field of view.                                                                                           | Kamburoğlu K.; Murat S.; Kiliç C.; Yüksel S.; Avsever H.; Farman A.; Scarfe W.C.                                                        | 2014 |
| The use of a polycaprolactone-tricalcium phosphate scaffold for bone regeneration of tooth socket facial wall defects and simultaneous immediate dental implant placement in Macaca fascicularis               | Goh B.T.; Chanchareonsook N.; Tideman H.; Teoh S.H.; Chow J.K.F.; Jansen J.A.                                                           | 2014 |
| Narrow-diameter implants: Are they a predictable treatment option? A literature review                                                                                                                         | Sierra-Sánchez J.-L.; Martínez-González A.; García-Sala Bonmatí F.; Mañes-Ferrer J.-F.; Brotons-Oliver A.                               | 2014 |
| [A tooth or an implant--literature based decision making].                                                                                                                                                     | Bar On H.; Sharon E.; Lipovezky-Adler M.; Haramaty O.; Smidt A.                                                                         | 2014 |
| Graftless sinus augmentation technique with contextual placement of implants: A case report                                                                                                                    | Chipaila N.; Marini R.; Sfaciotti G.L.; Cielo A.; Bonanome L.; Monaco A.                                                                | 2014 |
| Distal cantilever in full-arch prostheses and immediate loading: a retrospective clinical study.                                                                                                               | Romanos G.E.; Gupta B.; Gaertner K.; Nentwig G.H.                                                                                       | 2014 |
| Effects of connective tissue grafting on the facial gingival level following single immediate implant placement and provisionalization in the esthetic zone: a 1-year randomized controlled prospective study. | Yoshino S.; Kan J.Y.; Rungcharassaeng K.; Roe P.; Lozada J.L.                                                                           | 2014 |
| Clinical outcome of narrow-diameter (3.3-mm) locking-taper implants: a prospective study with 1 to 10 years of follow-up.                                                                                      | Mangano F.; Shibli J.A.; Sammons R.L.; Veronesi G.; Piattelli A.; Mangano C.                                                            | 2014 |
| Synergistic effects of bisphosphonate and calcium phosphate nanoparticles on peri-implant bone responses in osteoporotic rats                                                                                  | Alghamdi H.S.; Bosco R.; Both S.K.; Iafisco M.; Leeuwenburgh S.C.G.; Jansen J.A.; Van den Beucken J.J.P.                                | 2014 |
| Complication rate in 200 consecutive sinus lift procedures: Guidelines for prevention and treatment                                                                                                            | Moreno Vazquez J.C.; Gonzalez De Rivera A.S.; Gil H.S.; Mifsut R.S.                                                                     | 2014 |

|                                                                                                                                                                                                                                                   |                                                                                                                                                     |      |
|---------------------------------------------------------------------------------------------------------------------------------------------------------------------------------------------------------------------------------------------------|-----------------------------------------------------------------------------------------------------------------------------------------------------|------|
| Characterization of macrophage polarizing cytokines in the aseptic loosening of total hip replacements                                                                                                                                            | Jämsen E.; Kouri V.-P.; Olkkonen J.; Cör A.; Goodman S.B.; Konttinen Y.T.; Pajarinen J.                                                             | 2014 |
| A systematic review of implant-supported overdentures in the edentulous maxilla, compared to the mandible: how many implants?                                                                                                                     | Raghoobar G.M.; Meijer H.J.; Slot W.; Slater J.J.; Vissink A.                                                                                       | 2014 |
| Buccal bone resorption around posterior implants after surgery: a 1-year prospective study.                                                                                                                                                       | Takuma T.; Oishi K.; Manabe T.; Yoneda S.; Nagata T.                                                                                                | 2014 |
| Initial effects of a treatment by fixed partial dentures supported by mini dental implants from a patient's point of view                                                                                                                         | Peršić S.; Palac A.; Vojvodić D.; Čelebić A.                                                                                                        | 2014 |
| Autologous bone marrow aspirate concentrate repairs peri-implant bone defect                                                                                                                                                                      | Yang Y.; Zhong W.-J.; Liu G.; Ma G.-W.                                                                                                              | 2014 |
| Cosci versus Summers technique for crestal sinus lift: 3-year results from a randomised controlled trial.                                                                                                                                         | Esposito M.; Cannizzaro G.; Barausse C.; Cosci F.; Soardi E.; Felice P.                                                                             | 2014 |
| Applications of lasers in dental implantology                                                                                                                                                                                                     | Mu Y.; Li Q.; Zhao J.-Z.                                                                                                                            | 2014 |
| Reconstruction of the extremely atrophied mandible with iliac crest onlay grafts followed by two endosteal implants: A retrospective study with long-term follow-up                                                                               | Boven G.C.; Meijer H.J.A.; Vissink A.; Raghoobar G.M.                                                                                               | 2014 |
| Tension band wiring for proximal femoral varus osteotomy fixation in children                                                                                                                                                                     | Maranho D.A.; Pagnano R.G.; Volpon J.B.                                                                                                             | 2014 |
| The outcome of surgical treatment for periacetabular metastases                                                                                                                                                                                   | Shahid M.; Saunders T.; Jeys L.; Grimer R.                                                                                                          | 2014 |
| Maxillary sinus floor elevation using the osteotome technique in the presence of antral pseudocysts: a retrospective study with an average follow-up of 27 months.                                                                                | Feng Y.; Tang Y.; Liu Y.; Chen F.; Li D.                                                                                                            | 2014 |
| Systematic review and meta-analysis of the additional benefit of local prophylactic antibiotic therapy for infection rates in open tibia fractures treated with intramedullary nailing                                                            | Craig J.; Fuchs T.; Jenks M.; Fleetwood K.; Franz D.; Iff J.; Raschke M.                                                                            | 2014 |
| Inhibition of biofilm formation and antibacterial properties of a silver nano-coating on human dentine                                                                                                                                            | Besinis A.; De Peralta T.; Handy R.D.                                                                                                               | 2014 |
| The performance of cross-linked acellular arterial scaffolds as vascular grafts; pre-clinical testing in direct and isolation loop circulatory models                                                                                             | Pennel T.; Fercana G.; Bezuidenhout D.; Simionescu A.; Chuang T.-H.; Zilla P.; Simionescu D.                                                        | 2014 |
| Nerve damage assessment following implant placement in human cadaver jaws: an ex vivo comparative study.                                                                                                                                          | Murat S.; Kamburoğlu K.; Kiliç C.; Ozen T.; Gurbuz A.                                                                                               | 2014 |
| Mid-term survival following primary hinged total knee replacement is good irrespective of the indication for surgery                                                                                                                              | Baker P.; Critchley R.; Gray A.; Jameson S.; Gregg P.; Port A.; Deehan D.                                                                           | 2014 |
| Peri-strut low-intensity areas in optical coherence tomography correlate with peri-strut inflammation and neointimal proliferation: An in-vivo correlation study in the familial hypercholesterolemic coronary swine model of in-stent restenosis | Tellez A.; Afari M.E.; Buszman P.P.; Seifert P.; Cheng Y.; Milewski K.; McGregor J.C.; Garza J.A.; Roberts M.B.; Yi G.H.; Kaluza G.L.; Granada J.F. | 2014 |
| Perioperative adverse events after minimally invasive abdominal sacrocolpopexy                                                                                                                                                                    | Unger C.A.; Paraiso M.F.R.; Jelovsek J.E.; Barber M.D.; Ridgeway B.                                                                                 | 2014 |
| Clinical use of optical coherence tomography to identify angiographic silent stent thrombosis                                                                                                                                                     | Steigen S.E.; Holm N.R.; Butt N.; Maeng M.; Otsuka F.; Virmani R.; Ladich E.; Steigen T.K.                                                          | 2014 |
| Effect of total-body prehabilitation on postoperative outcomes: A systematic review and meta-analysis                                                                                                                                             | Santa Mina D.; Clarke H.; Ritvo P.; Leung Y.W.; Matthew A.G.; Katz J.; Trachtenberg J.; Alibhai S.M.H.                                              | 2014 |
| Predictive modelling for regional intensive care stroke workload: A review of annual neurointensive care workload                                                                                                                                 | Thompson R.; Laws P.                                                                                                                                | 2014 |
| Ultrastructural analysis of nanoparticles and ions released in periprosthetic membranes                                                                                                                                                           | Sabbatini M.; Gatti G.; Renò F.; Bosetti M.; Marchese L.; Cannas M.                                                                                 | 2014 |
| Relationship between peri-operative outcomes and hospital surgical volume of total hip arthroplasty in Japan                                                                                                                                      | Kaneko T.; Hirakawa K.; Fushimi K.                                                                                                                  | 2014 |
| Influence of ureter stenting before ureterorenoscopic treatment of ureteral calculi                                                                                                                                                               | Mueller J.; Riechert-Mühe N.; Schrader A.J.; Leitenberger A.; Steinestel J.; Kuczyk M.A.; Steffens S.; Hofmann R.; Sotelino J.                      | 2014 |
| Ischemia and functional status of the left arm and quality of life after left subclavian artery coverage during stent grafting of thoracic aortic diseases                                                                                        | Klocker J.; Koell A.; Erlmeier M.; Goebel G.; Jaschke W.; Fraedrich G.                                                                              | 2014 |
| Percutaneous transcatheter left atrial appendage closure devices: Role in the long-term management of atrial fibrillation                                                                                                                         | Gan C.H.; Bhat A.; Davis L.; Denniss A.R.                                                                                                           | 2014 |
| Peri-procedural management of anti-platelets and anticoagulation in patients undergoing MitraClip procedure                                                                                                                                       | Alsaidawi S.; Effat M.                                                                                                                              | 2014 |
| Predictors of hospital length of stay after implantation of a left ventricular assist device: An analysis of the INTERMACS registry                                                                                                               | Cotts W.G.; McGee Jr. E.C.; Myers S.L.; Naftel D.C.; Young J.B.; Kirklin J.K.; Grady K.L.                                                           | 2014 |
| Role of cardiovascular intervention as a bridge to liver transplantation                                                                                                                                                                          | Raval Z.; Harinstein M.E.; Flaherty J.D.                                                                                                            | 2014 |
| Five-level sub-axial cervical vertebrectomy and reconstruction: Technical report                                                                                                                                                                  | Reig A.; Parker S.L.; McGirt M.J.                                                                                                                   | 2014 |
| Randomized controlled trial comparing two procedures for anterior vaginal wall prolapse                                                                                                                                                           | Minassian V.A.; Parekh M.; Poplawsky D.; Gorman J.; Litzzy L.                                                                                       | 2014 |
| Current concepts in the management of periprosthetic fungal joint infection using antifungal bone cement                                                                                                                                          | Goff T.A.J.; Rambani R.; Ng A.B.                                                                                                                    | 2014 |
| Comparative effectiveness of ruptured cerebral aneurysm therapies: Propensity score analysis of clipping versus coiling                                                                                                                           | McDonald J.S.; McDonald R.J.; Fan J.; Kallmes D.F.; Lanzino G.; Cloft H.J.                                                                          | 2014 |
| Stent outcomes for infrapopliteal arterial occlusive disease                                                                                                                                                                                      | Mwipatayi B.P.; Thomas S.; Angel D.; Wong J.; Vijayan V.                                                                                            | 2013 |
| Ten-year survival and success rate of implant-prosthetic treatment                                                                                                                                                                                | Ihan Hren N.; Kiteska B.; Kopač I.                                                                                                                  | 2013 |
| Microbiological aspects of human mandibular subperiosteal dental implants.                                                                                                                                                                        | Rams T.E.; Balkin B.E.; Roberts T.W.; Molzan A.K.                                                                                                   | 2013 |



|                                                                                                                                                                                                                                      |                                                                                                                                                                                                                  |      |
|--------------------------------------------------------------------------------------------------------------------------------------------------------------------------------------------------------------------------------------|------------------------------------------------------------------------------------------------------------------------------------------------------------------------------------------------------------------|------|
| Periodontitis. Oral Complication of Diabetes.                                                                                                                                                                                        | Preshaw P.M.; Bissett S.M.                                                                                                                                                                                       | 2013 |
| Minimum intervention dentistry: Periodontics and implant dentistry                                                                                                                                                                   | Darby I.B.; Ngo L.                                                                                                                                                                                               | 2013 |
| Release of bone markers in immediately loaded and nonloaded dental implants: A randomized clinical trial                                                                                                                             | Prati A.J.; Casati M.Z.; Ribeiro F.V.; Cirano F.R.; Pastore G.P.; Pimentel S.P.; Casarin R.C.V.                                                                                                                  | 2013 |
| Peri-implant changes in different transplanted soft tissues around loaded endosseous implants in patients after oral tumor surgery                                                                                                   | Kovács A.F.; Walloway P.; Stefanelli U.; Landau S.                                                                                                                                                               | 2013 |
| Long-term stability of early implant placement with contour augmentation                                                                                                                                                             | Buser D.; Chappuis V.; Kuchler U.; Bornstein M.M.; Wittneben J.G.; Buser R.; Cavusoglu Y.; Belser U.C.                                                                                                           | 2013 |
| Assessment of buccal marginal alveolar peri-implant and periodontal defects using a cone beam CT system with and without the application of metal artefact reduction mode.                                                           | Kamburoglu K.; Kolsuz E.; Murat S.; Eren H.; Yüksel S.; Paksoy C.S.                                                                                                                                              | 2013 |
| [Risk assessment in patients undergoing osseous antiresorptive therapy in dentistry. An update].                                                                                                                                     | Born J.M.; Moser S.; Locher M.; Damerau G.; Stadlinger B.; Grätz K.W.; Jacobsen C.                                                                                                                               | 2013 |
| Influence of platform switching on bone-level alterations: A three-year randomized clinical trial                                                                                                                                    | Enkling N.; Jöhren P.; Katsoulis J.; Bayer S.; Jervøe-Storm P.-M.; Mericske-Stern R.; Jepsen S.                                                                                                                  | 2013 |
| A retrospective study of implant-abutment connections on crestal bone level                                                                                                                                                          | Lin M.-I.; Shen Y.-W.; Huang H.-L.; Hsu J.-T.; Fuh L.-J.                                                                                                                                                         | 2013 |
| Photodynamic therapy in dentistry: A literature review                                                                                                                                                                               | Gursoy H.; Ozcakir-Tomruk C.; Tanalp J.; Yilmaz S.                                                                                                                                                               | 2013 |
| Long-term outcomes of dental implants with a titanium plasma-sprayed surface: a 20-year prospective case series study in partially edentulous patients                                                                               | Chappuis V.; Buser R.; Brägger U.; Bornstein M.M.; Salvi G.E.; Buser D.                                                                                                                                          | 2013 |
| A case of a late and atypical knee prosthetic infection by no-biofilm producer <i>Pasteurella multocida</i> strain identified by pyrosequencing                                                                                      | Romanò C.L.; De Vecchi E.; Vassena C.; Manzi G.; Drago L.                                                                                                                                                        | 2013 |
| Orthopaedic patients undergoing total hip or knee replacement: Their dental hygiene status and perceptions of risk of peri-operative infection associated with future dental treatment                                               | Baskaran D.; Ujam A.; Ranjith R.                                                                                                                                                                                 | 2013 |
| Is there a gender difference in the outcome of cardiac interventions?                                                                                                                                                                | Subramanian G.; Chidambaram S.; Sangareddi V.                                                                                                                                                                    | 2013 |
| Clinical presentation and management strategies of tubercular pseudoaneurysm arising from large arteries: A tertiary care centre experience                                                                                          | Singh R.; Mohan B.; Wander P.; Tandon R.; Chhabra S.T.; Aslam N.                                                                                                                                                 | 2013 |
| Post-operative complications following primary ACL reconstruction using allogenic and autogenic soft tissue grafts: Increased relative morbidity risk is associated with increased graft diameter                                    | Crawford D.C.; Hallvik S.E.; Petering R.C.; Quilici S.M.; Black L.O.; Lavigne S.A.; Lapidus J.; Marshall L.M.                                                                                                    | 2013 |
| Effect of operator volume on mortality and complications of carotid artery stenting: United states perspective of last 5 years                                                                                                       | Chothani A.; Patel N.J.; Mehta K.; Shah N.; Savani G.T.; Arora S.; Grover P.; Tokas A.; Singh V.; Deshmukh A.; Rathod A.; Tuliani T.; Sudhakar R.; Badheka A.O.; Mohamad T.; Elder M.; Kondur A.; Schreiber T.L. | 2013 |
| Three-year clinical data of the biosolve-I study with the paclitaxel-eluting bioabsorbable magnesium scaffold (DREAMS) and multi-modality imaging analysis                                                                           | Haude M.; Erbel R.; Erne P.; Verheye S.; Vermeersch P.; Degen H.; Böse D.; Waksman R.; Weissman N.; Prati F.; Koolen J.                                                                                          | 2013 |
| A technique elucidating the retrieval of an adhered cover screw in a dental implant - A case report                                                                                                                                  | Bhuvaneswarri J.; Chandrasekaran S.C.                                                                                                                                                                            | 2013 |
| Influence of implant neck design and implant-abutment connection type on peri-implant health. Radiological study                                                                                                                     | Peñarrocha-Diago M.A.; Flichy-Fernández A.J.; Alonso-González R.; Peñarrocha-Oltra D.; Balaguer-Martínez J.; Peñarrocha-Diago M.                                                                                 | 2013 |
| Thermodynamic effects of laser irradiation of implants placed in bone: An in vitro study                                                                                                                                             | Leja C.; Geminiani A.; Caton J.; Romanos G.E.                                                                                                                                                                    | 2013 |
| Ailing and failing oral implants: initial therapy and surgical management                                                                                                                                                            | Sakka S.; Idrees M.; Alissa R.; Kujan O.                                                                                                                                                                         | 2013 |
| Peri-implant diseases and collaborative treatment.                                                                                                                                                                                   | Froum S.J.                                                                                                                                                                                                       | 2013 |
| Behaviour of soft tissues healing around single bone-level-implants placed immediately after tooth extraction A 1 year prospective cohort study                                                                                      | Lops D.; Romeo E.; Chiapasco M.; Procopio R.M.; Oteri G.                                                                                                                                                         | 2013 |
| The importance of oral health in (frail) elderly people - A review                                                                                                                                                                   | Van Der Putten G.-J.; De Visschere L.; Van Der Maarel-Wierink C.; Vanobbergen J.; Schols J.                                                                                                                      | 2013 |
| Silk fibroin and 4-hexylresorcinol incorporation membrane for guided bone regeneration                                                                                                                                               | Lee S.-W.; Kim S.-G.; Song J.-Y.; Kweon H.; Jo Y.-Y.; Lee K.-G.; Kang S.-W.; Yang B.-E.                                                                                                                          | 2013 |
| In patients with peri-implantitis, access flap surgery may be more effective than mechanical debridement in terms of clinical attachment gain although both treatments lead to improved clinical parameters (UT CAT #2432).          | Bautista L.; Huynh-Ba G.                                                                                                                                                                                         | 2013 |
| No-flow fraction and peri-shock pause during BLS given by healthcare professionals before and after a BLS course and after additional video instructions                                                                             | Eichelkraut A.; Poenicke C.; Karg S.; Rudolf C.; Papkalla N.; Richter T.; Koch T.; Koerndle H.; Narciss S.; Muller M.                                                                                            | 2013 |
| Outcomes and total costs of outpatient vs. inpatient peri-procedural anticoagulation management of mechanical prosthetic heart valve patients                                                                                        | Attaya H.; Shah N.D.; Wysokinski W.E.; Van Houten H.K.; Heit J.A.; McBane II R.D.                                                                                                                                | 2013 |
| Identification of high-risk plaques associated with peri-procedural myocardial injury following elective percutaneous coronary intervention: Assessment by high-sensitivity troponin-T measurements and optical coherence tomography | Yamamoto M.; Seino Y.; Otsuka T.; Kurihara O.; Negishi K.; Murakami D.; Takano M.; Mizuno K.                                                                                                                     | 2013 |
| Patient specific mandible reconstruction-virtual preoperative planning for ideal oral rehabilitation                                                                                                                                 | Essig H.; Schumann P.; Lindhorst D.; Rücker M.; Gellrich N.C.                                                                                                                                                    | 2013 |

|                                                                                                                                                                                                                                                           |                                                                                                                                                             |      |
|-----------------------------------------------------------------------------------------------------------------------------------------------------------------------------------------------------------------------------------------------------------|-------------------------------------------------------------------------------------------------------------------------------------------------------------|------|
| Surgical reconstruction of peri-implant bone defects with prehydrated and collagenated porcine bone and collagen barriers: case presentations                                                                                                             | Slotte C.; Lindfors N.; Nannmark U.                                                                                                                         | 2013 |
| Effects of smoking on periimplant health status and IL-1 $\beta$ , TNF- $\alpha$ , and PGE2 levels in periimplant crevicular fluid: a cross-sectional study on well-maintained implant recall patients                                                    | Tatli U.; Damlar I.; Erdoğan O.; Esen E.                                                                                                                    | 2013 |
| PCL-TCP scaffold for bone regeneration of tooth socket facial wall defects and simultaneous immediate implant placement in Macaca fascicularis                                                                                                            | Goh B.T.; Chanchareonsook N.; Tideman H.; Swee Hin T.; Jansen J.                                                                                            | 2013 |
| Implant surface detoxification: a comprehensive review                                                                                                                                                                                                    | Suarez F.; Monje A.; Galindo-Moreno P.; Wang H.-L.                                                                                                          | 2013 |
| Management of peri-implant soft tissues for rehabilitation of patients with resected mandibles reconstructed using free fibula flap                                                                                                                       | Subramanian A.V.; C J.P.; Kuriakose M.A.; S B.A.; Kumar V.V.                                                                                                | 2013 |
| Surgical treatment of pathologic fractures of the proximal femur due to metastases                                                                                                                                                                        | Rossi B.; Piccioli A.; Di Giacomo G.; Scudieri G.; Maccauro G.                                                                                              | 2013 |
| An in vitro study of alginate oligomer therapies on oral biofilms                                                                                                                                                                                         | Roberts J.L.; Khan S.; Emanuel C.; Powell L.C.; Pritchard M.F.; Onøyen E.; Myrvold R.; Thomas D.W.; Hill K.E.                                               | 2013 |
| Soft and hard tissues healing at immediate transmucosal implants placed into molar extraction sites with collagen membrane uncovered: a 12-month prospective study                                                                                        | Cafiero C.; Marenzi G.; Blasi A.; Siciliano V.I.; Nicolò M.; Sammartino G.                                                                                  | 2013 |
| The composite serratus anterior/rib free flap: A viable alternative to the fibula in head and neck reconstruction                                                                                                                                         | Ramirez C.; Petrisor D.; Pittman A.; Wax M.; Fernandes R.                                                                                                   | 2013 |
| Transfer of hip arthroplasty patients leads to increased cost and resource utilization in the receiving hospital                                                                                                                                          | Kamath A.F.; Austin D.C.; Derman P.B.; Israelite C.L.                                                                                                       | 2013 |
| Management of pancreatic collections with a novel endoscopically placed fully covered self expanding metal stent: The Australian experience                                                                                                               | Chandran S.; Efthymiou M.; Kaffes A.; Kwan V.; Chen J.W.; Murray M.; Williams D.; Welch C.; Chong A.; Gupta S.; Tam W.; Devereaux B.; Nguyen N.; Vaughan R. | 2013 |
| Successful treatment of duodenal perforation with over-the-scope clip after failed surgical repair                                                                                                                                                        | Fleming J.; Greenspan N.; Feller E.; Shah S.                                                                                                                | 2013 |
| Influence of PRF in the healing of bone and gingival tissues. Clinical and histological evaluations                                                                                                                                                       | Marrelli M.; Tatullo M.                                                                                                                                     | 2013 |
| Effect of zinc ions on improving implant fixation in osteoporotic bone                                                                                                                                                                                    | Li X.; Li Y.; Peng S.; Ye B.; Lin W.; Hu J.                                                                                                                 | 2013 |
| Re-stability of dental implants following treatment of peri-implantitis                                                                                                                                                                                   | Javed F.; Hussain H.A.; Romanos G.E.                                                                                                                        | 2013 |
| Managing an extreme peri-implantitis                                                                                                                                                                                                                      | Materni A.                                                                                                                                                  | 2013 |
| Supportive periodontal therapy and periodontal biotype as prognostic factors in implants placed in patients with a history of periodontitis                                                                                                               | Aguirre-Zorzano L.-A.; Vallejo-Aisa F.-J.; Estefanía-Fresco R.                                                                                              | 2013 |
| Immediate provisionalisation of single post-extractive implants versus implants placed in healed sites in the anterior maxilla: 1-year results from a multicentre controlled cohort study                                                                 | Grandi T.; Guazzi P.; Samarani R.; Grandi G.                                                                                                                | 2013 |
| Use of platform-switched implants with internal conical anti-rotational connection in single-tooth implant replacement                                                                                                                                    | Di Iorioa E.; Berardini M.                                                                                                                                  | 2013 |
| Safety and efficacy of a biomimetic monolayer of permanently bound multi-phosphonic acid molecules on dental implants: 1 year post-loading results from a pilot quadruple-blinded randomised controlled trial                                             | Esposito M.; Dojcinovic I.; Germon L.; Lévy N.; Curno R.; Buchini S.; Péchy P.; Aronsson B.-O.                                                              | 2013 |
| Immediate loading of 'All-on-4' maxillary prostheses using trans-sinus tilted implants without sinus bone grafting: a retrospective study reporting the 3-year outcome                                                                                    | Maló P.; Nobre Md.; Lopes A.                                                                                                                                | 2013 |
| Hard tissue response to argon plasma cleaning/sterilisation of customised titanium abutments versus 5-second steam cleaning: results of a 2-year post-loading follow-up from an explanatory randomised controlled trial in periodontally healthy patients | Canullo L.; Penarrocha D.; Micarelli C.; Massidda O.; Bazzoli M.                                                                                            | 2013 |
| Skin-reducing mastectomy and one-stage implant reconstruction with a myodermal flap: A safe and effective technique in risk-reducing and therapeutic mastectomy                                                                                           | Irwin G.W.; Black A.; Refsum S.E.; McIntosh S.A.                                                                                                            | 2013 |
| Stenting vs. Endarterectomy vs. Medical therapy trials update                                                                                                                                                                                             | Taylor P.R.                                                                                                                                                 | 2013 |
| Platelet reactivity measurements before and after percutaneous coronary intervention among patients undergoing early invasive management for acute coronary syndrome                                                                                      | Jing M.X.; Carvalho L.; Mejin M.; Fong A.; Troughton R.; Chin C.T.; Teo Z.L.; Byan; Richards A.M.; Tang H.C.; Chan M.                                       | 2013 |
| Utility of week one radiographs post total hip arthroplasty                                                                                                                                                                                               | Stevens J.; van Tonder F.; Schlicht S.; Love B.; Goldwasser M.; Choong P.                                                                                   | 2013 |
| Results of the surgical correction of urinary stress incontinence according to the type of transobturator tape utilized                                                                                                                                   | Padilla-Fernández B.; García-Cenador M.B.; Gómez-García A.; Mirón-Canelo J.A.; Gil-Vicente Á.; Silva-Abuín J.M.; Lorenzo-Gómez M.F.                         | 2013 |
| Clinical application of artificial lumbar disc replacement: Present and future                                                                                                                                                                            | Bai W.-Y.; Gu H.-S.; Liao Z.-H.; Liu W.-Q.                                                                                                                  | 2013 |
| Ozone applications in dentistry: An overview                                                                                                                                                                                                              | Ahmed J.; Binnal A.; Rajan B.; Denny C.; Shenoy N.                                                                                                          | 2013 |
| Network meta-analysis for evaluating interventions in implant dentistry: the case of peri-implantitis treatment                                                                                                                                           | Faggion C.M.; Chambrone L.; Listl S.; Tu Y.-K.                                                                                                              | 2013 |
| Radiographic analysis of a transalveolar sinus-lift technique: A multipractice retrospective study with a mean follow-up of 5 years                                                                                                                       | Soardi E.; Cosci F.; Checchi V.; Pellegrino G.; Bozzoli P.; Felice P.                                                                                       | 2013 |
| Long-term results after treatment of periodontitis in patients with Papillon-Lefèvre syndrome: Success and failure                                                                                                                                        | Nickles K.; Schacher B.; Ratka-Krüger P.; Krebs M.; Eickholz P.                                                                                             | 2013 |
| The bleeding site: A multi-level analysis of associated factors                                                                                                                                                                                           | Farina R.; Tomasi C.; Trombelli L.                                                                                                                          | 2013 |

|                                                                                                                                                                                                            |                                                                                                                                                 |      |
|------------------------------------------------------------------------------------------------------------------------------------------------------------------------------------------------------------|-------------------------------------------------------------------------------------------------------------------------------------------------|------|
| Impact of excessive occlusal load on successfully-osseointegrated dental implants: a literature review.                                                                                                    | Chang M.; Chronopoulos V.; Mattheos N.                                                                                                          | 2013 |
| Overdentures in the edentulous mandible supported by implants and retained by a Dolder bar: a 5-year prospective study                                                                                     | Heschl A.; Payer M.; Clar V.; Stopper M.; Wegscheider W.; Lorenzoni M.                                                                          | 2013 |
| Reduction of precocious peri-implant resorption cone                                                                                                                                                       | De Santis D.; Zanotti G.; Morandini S.; Bordanzi A.; Gerosa R.; Rodella L.F.; Rossetto A.; Chiarini L.; Nocini P.F.; Bertossi D.                | 2013 |
| B-type natriuretic peptide guided therapy reduces length of hospital stay post left ventricular assist device implantation                                                                                 | Hellman Y.; Malik A.S.; Wang I.-W.; Wozniak T.C.; Pickrell J.; Hashmi Z.A.; Gradus-Pizlo I.; Hadi A.                                            | 2013 |
| Percutaneous coronary intervention improves ejection fraction in ischemic cardiomyopathy                                                                                                                   | Chonde M.; Morrissey R.; Azarbal B.; Herr J.; Hamilton M.                                                                                       | 2013 |
| Dabigatran-demonstrates the need for comprehensive approaches to optimise the use of new drugs                                                                                                             | Malmstrom R.E.; Godman B.; Diogene E.; Bennie M.; Furst J.; Gutiérrez-Ibarluzea I.; McCullagh L.; Vlahovic-Palcevski V.; Gustafsson L.L.        | 2013 |
| Inpatient procedures in elderly women: An analysis over time                                                                                                                                               | Oliphant S.S.; Ghetti C.; McGough III R.L.; Wang L.; Bunker C.H.; Lowder J.L.                                                                   | 2013 |
| Multi-contrast late enhancement CMR determined gray zone and papillary muscle involvement predict appropriate ICD therapy in patients with ischemic heart disease                                          | Yang Y.; Connolly K.A.; Zeidan-Shwiri T.; Lu Y.; Paul G.; Roifman I.; Zia M.I.; Graham J.J.; Dick A.J.; Crystal E.; Wright G.A.                 | 2013 |
| Enhanced recovery in Sri Lanka                                                                                                                                                                             | Fernando P.M.                                                                                                                                   | 2013 |
| Deep circumflex iliac artery flap with osseointegrated implants for reconstruction of mandibular benign lesions: Clinical experience of 33 cases                                                           | Qu X.; Zhang C.; Yang W.; Wang M.                                                                                                               | 2013 |
| Long-term follow-up of turned single implants placed in periodontally healthy patients after 16 to 22 years: Microbiologic outcome                                                                         | Dierens M.; Vandeweghe S.; Kisch J.; Persson G.R.; Cosyn J.; De Bruyn H.                                                                        | 2013 |
| Altered sensation caused by peri-implantitis: A case report                                                                                                                                                | Kim J.-E.; Shim J.-S.; Huh J.-B.; Rim J.-S.; Lee J.-Y.; Shin S.-W.                                                                              | 2013 |
| Tilted trans-sinus implants for the treatment of maxillary atrophy: Case series of 35 consecutive patients                                                                                                 | Testori T.; Mandelli F.; Mantovani M.; Taschieri S.; Weinstein R.L.; Del Fabbro M.                                                              | 2013 |
| Vestibuloplasty: Porcine collagen matrix versus free gingival graft: A clinical and histologic study                                                                                                       | Schmitt C.M.; Tudor C.; Kiener K.; Wehrhan F.; Schmitt J.; Eitner S.; Agaimy A.; Schlegel K.A.                                                  | 2013 |
| Accuracy of peri-implant bone thickness and validity of assessing bone augmentation material using cone beam computed tomography                                                                           | Wang D.; Künzel A.; Golubovic V.; Mihatovic I.; John G.; Chen Z.; Becker J.; Schwarz F.                                                         | 2013 |
| A two-center retrospective analysis of long-term clinical and radiologic data of TiUnit and turned implants placed in the same mouth.                                                                      | Polizzi G.; Gualini F.; Friberg B.                                                                                                              | 2013 |
| Teeth--too early to eulogize!                                                                                                                                                                              | Levin L.; Kessler-Baruch O.                                                                                                                     | 2013 |
| Dental implants placed on bone subjected to vertical alveolar distraction show the same performance as those placed on primitive bone                                                                      | Pérez-Sayáns M.; León-Camacho M.L.A.; Somoza-Martín J.-M.; Fernández-González B.; Blanes-Vázquez-Gundín S.; Gándara-Rey J.-M.; García-García A. | 2013 |
| Evaluation of a compression resistant matrix for recombinant human bone morphogenetic protein-2                                                                                                            | Lu S.X.; Fiorini T.; Lee J.; Prasad H.S.; Buxton A.N.; Bisch F.C.; Dixon D.R.; Susin C.; Wikesjö U.M.E.                                         | 2013 |
| A lower border augmentation technique to allow implant placement after a bilateral mandibular fracture as a complication of vertical distraction osteogenesis: A case report                               | Perdijk F.B.T.; Meijer G.J.; Soehardi A.; Koole R.                                                                                              | 2013 |
| Transcatheter AVR-Does this technology have merit and in whom? An anesthesiologist's perspective                                                                                                           | Shanewise J.                                                                                                                                    | 2013 |
| Peri-implant galactoceles following vacuum-assisted core biopsy of the breast: A cautionary tale                                                                                                           | Taylor D.; Kulawansa S.T.; McCallum D.D.; Saunders C.                                                                                           | 2013 |
| Radiographic evaluation of modern oral implants with emphasis on crestal bone level and relevance to peri-implant health                                                                                   | De Bruyn H.; Vandeweghe S.; Ruyffelaert C.; Cosyn J.; Sennerby L.                                                                               | 2013 |
| Immediate placement and provisionalization of single-tooth implants involving a definitive individual abutment: A clinical and radiographic retrospective study                                            | Hartlev J.; Kohberg P.; Ahlmann S.; Gotfredsen E.; Andersen N.T.; Isidor F.; Schou S.                                                           | 2013 |
| Manual versus sonic-powered toothbrushing for plaque reduction in patients with dental implants: an explanatory randomised controlled trial.                                                               | Swierkot K.; Brusius M.; Leismann D.; Nonnenmacher C.; Nüsing R.; Lubbe D.; Schade-Brittinger C.; Mengel R.                                     | 2013 |
| Peri-implant disease: current understanding and future direction.                                                                                                                                          | Murray C.M.; Knight E.T.; Russell A.A.; Tawse-Smith A.; Leichter J.W.                                                                           | 2013 |
| A comparison of teeth and implants during maintenance therapy in terms of the number of disease-free years and costs - An in vivo internal control study                                                   | Fardal Ø.; Grytten J.                                                                                                                           | 2013 |
| Evaluation of implant success: A review of past and present concepts                                                                                                                                       | Karthik K.; Sivakumar; Sivaraj; Thangaswamy V.                                                                                                  | 2013 |
| Techniques to control or avoid cement around implant-retained restorations                                                                                                                                 | Present S.; Levine R.A.                                                                                                                         | 2013 |
| The effect of varying implant position in immediately loaded implant-supported mandibular overdentures.                                                                                                    | Shaarawy M.A.; Aboelross E.M.                                                                                                                   | 2013 |
| Immediate loading of 2(all-on-2) versus 4 (all-on-4) implants placed with a flapless technique supporting mandibular cross-arch fixed prostheses: 1-year results from a pilot randomised controlled trial. | Cannizzaro G.; Felice P.; Soardi E.; Ferri V.; Leone M.; Lazzarini M.; Audino S.; Esposito M.                                                   | 2013 |
| 1-stage versus 2-stage lateral maxillary sinus lift procedures: 4-month post-loading results of a multicenter randomised controlled trial.                                                                 | Felice P.; Pistilli R.; Piattelli M.; Soardi E.; Pellegrino G.; Corvino V.; Esposito M.                                                         | 2013 |
| The patient with severe heart disease requiring OLV for non cardiac surgery                                                                                                                                | Rovira I.                                                                                                                                       | 2014 |
| The comparison of acellular dermal matrix allografts with free gingival grafts in the augmentation of peri-implant attached mucosa: a randomised controlled trial.                                         | Basegmez C.; Karabuda Z.C.; Demirel K.; Yalcin S.                                                                                               | 2013 |
| Application of ozone in the treatment of periodontal disease                                                                                                                                               | Srikanth A.; Sathish M.; Harsha A.V.S.                                                                                                          | 2013 |

|                                                                                                                                                                                                                                         |                                                                                                                                                                                                                                            |      |
|-----------------------------------------------------------------------------------------------------------------------------------------------------------------------------------------------------------------------------------------|--------------------------------------------------------------------------------------------------------------------------------------------------------------------------------------------------------------------------------------------|------|
| A review of factors influencing the incidence and severity of plaque-induced gingivitis                                                                                                                                                 | Trombelli L.; Farina R.                                                                                                                                                                                                                    | 2013 |
| The role of pericranium grafts in the reduction of postoperative dehiscences and bone resorption after reconstruction of severely deficient edentulous ridges with autogenous onlay bone grafts                                         | Chiapasco M.; Autelitano L.; Rabbiosi D.; Zaniboni M.                                                                                                                                                                                      | 2013 |
| Photodynamic therapy: The imminent milieu for treating oral lesions                                                                                                                                                                     | Mohanty N.; Jalaluddin M.; Kotina S.; Routray S.; Ingale Y.                                                                                                                                                                                | 2013 |
| Preoperative optimization of anemia improves outcome?                                                                                                                                                                                   | Gombotz H.                                                                                                                                                                                                                                 | 2014 |
| Transcatheter AVR – Does this technology have merit and in whom? An anesthesiologist's perspective                                                                                                                                      | Shanewise J.                                                                                                                                                                                                                               | 2014 |
| Native mitral valve endocarditis caused by staphylococcus capitis                                                                                                                                                                       | Del Rosario R.; Aldeen M.B.; Ahmed M.                                                                                                                                                                                                      | 2013 |
| Aneurysm rupture after endovascular flow diversion: The possible role of persistent flows through the transition zone associated with device deformation                                                                                | Darsaut T.E.; Rayner-Hartley E.; Makoyeva A.; Salazkin I.; Berthelet F.; Raymond J.                                                                                                                                                        | 2013 |
| Increased Crown-To-Implant Ratio May Not Be a Risk Factor for Dental Implant Failure under Appropriate Plaque Control                                                                                                                   | Okada S.; Koretake K.; Miyamoto Y.; Oue H.; Akagawa Y.                                                                                                                                                                                     | 2013 |
| One-piece zirconia oral implants: One-year results from a prospective case series. 2. Three-unit fixed dental prosthesis (FDP) reconstruction                                                                                           | Kohal R.-J.; Patzelt S.B.M.; Butz F.; Sahlin H.                                                                                                                                                                                            | 2013 |
| Single unit attachments improve peri-implant soft tissue conditions in mandibular overdentures supported by four implants                                                                                                               | Cordaro L.; di Torresanto V.M.; Petricevic N.; Jornet P.R.; Torsello F.                                                                                                                                                                    | 2013 |
| Recurrent oral squamous cell carcinoma after resection and mandibular implant rehabilitation: A preliminary report of eight patients                                                                                                    | Beck-Mannagetta J.; Eirisch G.; Etzelsdorfer M.; Hutarew G.                                                                                                                                                                                | 2013 |
| A 10-year retrospective clinical evaluation of immediately loaded tapered maxillary implants.                                                                                                                                           | Harel N.; Piek D.; Livne S.; Palti A.; Ormianer Z.                                                                                                                                                                                         | 2013 |
| The characteristics and new treatment paradigm of dental implant-related chronic rhinosinusitis                                                                                                                                         | Chen Y.-W.; Huang C.-C.; Chang P.-H.; Chen C.-W.; Wu C.-C.; Fu C.-H.; Lee T.-J.                                                                                                                                                            | 2013 |
| Immediate loading with LASER-treated surface implant: two-year resonance frequency analysis follow-up                                                                                                                                   | Duvina M.; Barbato L.; Buti J.; Delle Rose G.; Brancato L.; Casella G.; Longoni S.; Sartori M.; Amunni F.; Tonelli P.                                                                                                                      | 2013 |
| A palatal roll envelope technique for peri-implant mucosa reconstruction: A prospective case series study                                                                                                                               | Man Y.; Wang Y.; Qu Y.; Wang P.; Gong P.                                                                                                                                                                                                   | 2013 |
| Reconstruction of bilateral maxillectomy defect                                                                                                                                                                                         | Joseph S.T.; Thankappan K.; Rahul B.; Shetty S.; Chandrasekhara Rao L.M.; Kuriakose M.A.; Iyer S.                                                                                                                                          | 2013 |
| Zygoma Implant Reconstruction of Acquired Maxillary Bony Defects                                                                                                                                                                        | Vega L.G.; Gielinck W.; Fernandes R.P.                                                                                                                                                                                                     | 2013 |
| Impact of local and systemic factors on additional peri-implant bone loss                                                                                                                                                               | de Souza J.G.; Neto A.R.; Filho G.S.; Dalago H.R.; de Souza Júnior J.M.; Bianchini M.A.                                                                                                                                                    | 2013 |
| A novel standard of quality evaluation in bradyarrhythmia pacing                                                                                                                                                                        | Brough C.E.P.; McGee C.; Rao A.; Wright D.J.                                                                                                                                                                                               | 2013 |
| Painful prosthesis: Approaching the patient with persistent pain following total hip and knee arthroplasty                                                                                                                              | Piscitelli P.; Iolascon G.; Innocenti M.; Civinini R.; Rubinacci A.; Muratore M.; D'Arienzo M.; Tranquilli Leali P.; Carossino A.M.; Brandi M.L.                                                                                           | 2013 |
| 1st Global Conference on Contraception, Reproductive and Sexual Health 2013                                                                                                                                                             |                                                                                                                                                                                                                                            | 2013 |
| Safety of slow pathway ablation in patients with atrioventricular nodal reentry tachycardia and prolonged pr intervals                                                                                                                  | Turner J.W.; Doris J.M.; Rostomian A.; Gupta N.; Ji S.J.; Kangavari S.; Lee M.J.; Nageh M.F.; Wu J.; Brar S.S.                                                                                                                             | 2013 |
| 3 years results of endovascular therapy with a new generation nitinol stent for femoro-popliteal artery lesions. Insights from a single-centre outcome analysis of a MISAGO2 subgroup                                                   | Boos I.; Kralj I.; Müller-Bühl U.                                                                                                                                                                                                          | 2013 |
| Hybrid coronary revascularization: A case series                                                                                                                                                                                        | Duarte Rodrigues J.D.R.; Mariana Vasconcelos M.V.; Rui Rodrigues R.R.; Sergio Machado Leite S.M.L.; Mario Amorim M.A.; Manuel Campelo M.C.; Jose Pedro Nunes J.P.N.; Joao Carlos Silva J.C.S.; Paulo Pinho P.P.; Maria Julia Maciel M.J.M. | 2013 |
| Comparison of different designs of implant-retained overdentures and fixed full-arch implant-supported prosthesis on stress distribution in edentulous mandible - A computed tomography-based three-dimensional finite element analysis | Barão V.A.R.; Delben J.A.; Lima J.; Cabral T.; Assunção W.G.                                                                                                                                                                               | 2013 |
| Receptor activator of nuclear factor kappa B (RANK) as a determinant of peri-implantitis                                                                                                                                                | Rakic M.; Nikolic-Jakoba N.; Struillou X.; Petkovic-Curcin A.; Stamatović N.; Matić S.; Jankovic S.; Aleksic Z.; Vasilčić D.; Lekovic V.; Vojvodic D.                                                                                      | 2013 |
| Dental phobia is no contraindication for oral implant therapy                                                                                                                                                                           | Enkling N.; Hardt K.; Katsoulis J.; Ramseier C.A.; Colombo A.; Jöhren P.; Mericske-Stern R.                                                                                                                                                | 2013 |
| Oral lichen planus and dental implants - A retrospective study                                                                                                                                                                          | Czerninski R.; Eliezer M.; Wilensky A.; Soskolne A.                                                                                                                                                                                        | 2013 |
| The role of cements in dental lant success, Part I.                                                                                                                                                                                     | Wadhvani C.P.; Schwedhelm E.R.                                                                                                                                                                                                             | 2013 |
| The care and maintenance of dental implants: a team approach.                                                                                                                                                                           | Joyce M.                                                                                                                                                                                                                                   | 2013 |
| Peri-implant bone density in senile osteoporosis-changes from implant placement to osseointegration                                                                                                                                     | Beppu K.; Kido H.; Watazu A.; Teraoka K.; Matsuura M.                                                                                                                                                                                      | 2013 |
| An assessment of different crown-to-implant ratio for implant teeth in the posterior region over 5 years                                                                                                                                | Zhao B.; Feng W.; Wang D.; Jang L.; Deng C.; Shang D.; Zhang C.                                                                                                                                                                            | 2013 |
| Implant failure associated with actinomycosis in a medically compromised patient.                                                                                                                                                       | Sun C.X.; Henkin J.M.; Ririe C.; Javadi E.                                                                                                                                                                                                 | 2013 |
| Impact of immediate loading on early bone healing at two-piece implants placed in fresh extraction sockets: An experimental study in the beagle dog                                                                                     | Blanco J.; Mareque S.; Liñares A.; Pérez J.; Muñoz F.; Ramos I.                                                                                                                                                                            | 2013 |

|                                                                                                                                                                                   |                                                                                                                                                                          |      |
|-----------------------------------------------------------------------------------------------------------------------------------------------------------------------------------|--------------------------------------------------------------------------------------------------------------------------------------------------------------------------|------|
| Clinical outcome and bone healing of implants placed with high insertion torque: 12-month results from a multicenter controlled cohort study                                      | Grandi T.; Guazzi P.; Samarani R.; Grandi G.                                                                                                                             | 2013 |
| Infection control and prevention practices for mechanical circulatory support: An international survey                                                                            | Kusne S.; Danziger-Isakov L.; Mooney M.; Grossi P.; Husain S.; Pagani F.; Silveira F.P.; Hannan M.M.; Huprikar S.; Jaroszewski D.E.; Chang Y.-H.H.; Staley L.; Arabia F. | 2013 |
| A budget impact model for paclitaxel-eluting stent in femoropopliteal disease in France                                                                                           | De Cock E.; Sapoval M.; Julia P.; De Lissovoy G.; Lopes S.                                                                                                               | 2013 |
| Allogeneic transfusion reduction with the use of tranexamic acid in total hip replacement                                                                                         | Serra N.; Barbero M.; Maric M.; Peral A.; Rey P.                                                                                                                         | 2013 |
| Simulation of peri-implant bone healing due to immediate loading in dental implant treatments                                                                                     | Chou H.-Y.; Müftü S.                                                                                                                                                     | 2013 |
| Differences in peri-implant conditions between fully and partially edentulous subjects: A systematic review                                                                       | De Waal Y.C.M.; Van Winkelhoff A.J.; Meijer H.J.A.; Raghoobar G.M.; Winkel E.G.                                                                                          | 2013 |
| The use of porous titanium granules for treatment of peri-implantitis lesions: preliminary clinical and radiographic results in humans                                            | Mijiritsky E.; Yatzkaier G.; Mazor Z.; Lorean A.; Levin L.                                                                                                               | 2013 |
| Efficacy of triclosan-based toothpastes in the prevention and treatment of plaque-induced periodontal and peri-implant diseases                                                   | Trombelli L.; Farina R.                                                                                                                                                  | 2013 |
| Comparison of soft tissue healing around implants in beagle dogs: Flap surgery versus flapless surgery                                                                            | Lei Q.; Chen J.; Jiang J.; Fu X.; Lin H.; Cai Z.                                                                                                                         | 2013 |
| Aetiology, microbiology and therapy of periapical lesions around oral implants: A retrospective analysis                                                                          | Lefever D.; Van Assche N.; Temmerman A.; Teughels W.; Quirynen M.                                                                                                        | 2013 |
| Early implant loading in the atrophic posterior maxilla: 1-stage lateral versus crestal sinus lift and 8 mm hydroxyapatite-coated implants. A 5-year randomised controlled trial. | Cannizzaro G.; Felice P.; Minciarelli A.F.; Leone M.; Viola P.; Esposito M.                                                                                              | 2013 |
| Influence of buccal bony crest width on marginal dimensions of peri-implant hard and soft tissues after implant installation. An experimental study in dogs                       | Baffone G.M.; Botticelli D.; Pereira F.P.; Favero G.; Schweikert M.; Lang N.P.                                                                                           | 2013 |
| Definitive abutment-driven stage-two surgery as a means to reduce peri-implant soft tissue changes: introduction of a new concept.                                                | Pelekanos S.; Ntounis A.; Jovanovic S.A.; Euwe E.                                                                                                                        | 2013 |
| Immediate provisionalization of mini-implants with friction-engaging abutments in the mandibular anterior region: a 1-year retrospective study.                                   | Choi K.S.; Yoon H.C.; Cho Y.S.                                                                                                                                           | 2013 |
| Alterations in soft tissue levels and aesthetics over a 16-22year period following single implant treatment in periodontally-healthy patients: A retrospective case series        | Dierens M.; De Bruecker E.; Vandeweghe S.; Kisch J.; De Bruyn H.; Cosyn J.                                                                                               | 2013 |
| Influence of presence or absence of teeth adjacent to implants installed immediately into extraction sockets on peri-implant hard tissue levels: An experimental study in the dog | Favero G.; Botticelli D.; Rea M.; Pantani F.; León I.G.; Lang N.P.                                                                                                       | 2013 |
| Antimicrobial photodynamic therapy using visible light plus water-filtered infrared-A (wIRA)                                                                                      | Al-Ahmad A.; Tennert C.; Karygianni L.; Wrbs K.T.; Hellwig E.; Altenburger M.J.                                                                                          | 2013 |
| Maxillary overdentures supported by four or six implants in the anterior region; 1-year results from a randomized controlled trial                                                | Slot W.; Raghoobar G.M.; Vissink A.; Meijer H.J.A.                                                                                                                       | 2013 |
| Comparative study of Chinese hamster ovary cell versus escherichia coli-derived bone morphogenetic protein-2 using the critical-size supraalveolar peri-implant defect model      | Lee J.; Lee E.N.; Yoon J.; Chung S.-M.; Prasad H.; Susin C.; Wikesjö U.M.E.                                                                                              | 2013 |
| Effect of misfit of cement-retained implant single crowns on crestal bone changes.                                                                                                | Chen C.J.; Papaspyridakos P.; Guze K.; Singh M.; Weber H.P.; Gallucci G.O.                                                                                               | 2013 |
| The prognosis of partial implant-supported fixed dental prostheses with cantilevers. A 5-year retrospective cohort study.                                                         | Maló P.; de Araujo Nobre M.; Lopes A.                                                                                                                                    | 2013 |
| Effect of platelet-rich plasma and platelet-rich fibrin on peri-implant bone defects in dogs                                                                                      | Jeong K.-I.; Kim S.-G.; Oh J.-S.; Lee S.-Y.; Cho Y.-S.; Yang S.-S.; Park S.-C.; You J.-S.; Lim S.-C.; Jeong M.-A.; Kim J.-S.; Lee S.-Y.                                  | 2013 |
| Mechanical left ventricular support using a 50 cc 8 Fr fibre-optic intra-aortic balloon technology: A case report                                                                 | Mulholland J.; Yarham G.; Clements A.; Morris C.; Loja D.                                                                                                                | 2013 |
| Sacrocolpopexy (robotic assisted and laparoscopic): Is outcome better with fellowship trained urogynecologist?                                                                    | Bagaria M.; Luck A.M.; Abed H.; Holmquist L.; Atiemo H.; Richardson D.; Rivers K.                                                                                        | 2013 |
| Experiences of young women living with developmental dysplasia of the hip: Insight into their experiences of surgery and recovery                                                 | Gambling T.S.; Long A.F.                                                                                                                                                 | 2013 |
| Associated factors with repeat coronary angioplasty during the drug eluting stent era: A high volume center investigation                                                         | Liu C.; Yan H.-B.; Zhao H.-J.; Song L.; Zheng B.; Chi Y.-P.; Wang S.-P.; Wang J.; Peng H.-Y.; Wu Z.                                                                      | 2013 |
| A comparative analysis of periimplant bone levels of immediate and conventionally loaded implants                                                                                 | Guruprasada M.; Thapliyal G.K.; Pawar V.R.                                                                                                                               | 2013 |
| Reimplantation of Dental Implants following Ligature-Induced Peri-Implantitis: A Pilot Study in Dogs                                                                              | Levin L.; Zigdon H.; Coelho P.G.; Suzuki M.; Machtei E.E.                                                                                                                | 2013 |
| Implant decontamination during surgical peri-implantitis treatment: A randomized, double-blind, placebo-controlled trial                                                          | De Waal Y.C.M.; Raghoobar G.M.; Huddleston Slater J.J.R.; Meijer H.J.A.; Winkel E.G.; Van Winkelhoff A.J.                                                                | 2013 |
| Three-years clinical outcome of immediate provisionalization of single Osseospeed™ implants in extraction sockets and healed ridges                                               | De Bruyn H.; Raes F.; Cooper L.F.; Reside G.; Garriga J.S.; Tarrida L.G.; Wiltfang J.; Kern M.                                                                           | 2013 |
| A single-tooth, two-piece zirconia implant located in the anterior maxilla: A clinical report                                                                                     | Aydin C.; Yilmaz H.; Bankoğlu M.                                                                                                                                         | 2013 |
| Long-Term Clinical, Microbiological, and Radiographic Outcomes of Brånemark™ Implants Installed in Augmented Maxillary Bone for Fixed Full-Arch Rehabilitation                    | De Bruyn H.; Bouvry P.; Collaert B.; De Clercq C.; Persson G.R.; Cosyn J.                                                                                                | 2013 |
| Acute Inflammatory Response to Laser-Induced Micro- and Nano-Sized Titanium Surface Features                                                                                      | Palmquist A.; Johansson A.; Suska F.; Brånemark R.; Thomsen P.                                                                                                           | 2013 |

|                                                                                                                                                                                 |                                                                                                                                                                                                                                                                                                                                                                                                   |      |
|---------------------------------------------------------------------------------------------------------------------------------------------------------------------------------|---------------------------------------------------------------------------------------------------------------------------------------------------------------------------------------------------------------------------------------------------------------------------------------------------------------------------------------------------------------------------------------------------|------|
| Radiological evaluation of single implants in maxillary anterior sites with special emphasis on their relation to adjacent teeth - a 3-year follow-up study                     | Vilhjálmsson V.H.; Klock K.S.; Størksen K.; Bårdsen A.                                                                                                                                                                                                                                                                                                                                            | 2013 |
| Clinical outcomes in the presence and absence of keratinized mucosa in mandibular guided implant surgeries: a pilot study with a proposal for the modification of the technique | Maló P.; Rigolizzo M.; Nobre Md.; Lopes A.; Agliardi E.                                                                                                                                                                                                                                                                                                                                           | 2013 |
| Case of severe bone atrophy of the posterior maxilla rehabilitated with blocks of equine origin bone: Histological results                                                      | Pistilli R.; Signorini L.; Pisacane A.; Lizio G.; Felice P.                                                                                                                                                                                                                                                                                                                                       | 2013 |
| Innate immune receptor expression in peri-implant tissues of patients with different susceptibility to periodontal diseases                                                     | Koutouzis T.; Catania D.; Neiva K.; Wallet S.M.                                                                                                                                                                                                                                                                                                                                                   | 2013 |
| Long-term outcomes of short dental implants supporting single crowns in posterior region: A clinical retrospective study of 5-10 years                                          | Lai H.-C.; Si M.-S.; Zhuang L.-F.; Shen H.; Liu Y.-L.; Wismeijer D.                                                                                                                                                                                                                                                                                                                               | 2013 |
| A 5-year retrospective study on postsurgical periimplant infection during initial bone healing period: Clinical characteristics, management, and prognosis                      | Ma W.; Duan Y.; Sun B.; Liu Y.; Xie C.; Li D.                                                                                                                                                                                                                                                                                                                                                     | 2013 |
| Less invasive polyaxial locking plate fixation in periprosthetic and peri-implant fractures of the femur - A prospective study of 41 patients                                   | Ruchholtz S.; El-Zayat B.; Kreslo D.; Bücking B.; Lewan U.; Krüger A.; Zettl R.                                                                                                                                                                                                                                                                                                                   | 2013 |
| High bone-implant contact achieved by photofunctionalization to reduce periimplant stress: A three-dimensional finite element analysis                                          | Ohyama T.; Uchida T.; Shibuya N.; Nakabayashi S.; Ishigami T.; Ogawa T.                                                                                                                                                                                                                                                                                                                           | 2013 |
| Metastatic colon cancer, version 3.2013: Featured updates to the NCCN guidelines                                                                                                | Benson III A.B.; Bekaii-Saab T.; Chan E.; Chen Y.-J.; Choti M.A.; Cooper H.S.; Engstrom P.F.; Enzinger P.C.; Fakih M.G.; Fenton M.J.; Fuchs C.S.; Grem J.L.; Hunt S.; Kamel A.; Leong L.A.; Lin E.; May K.S.; Mulcahy M.F.; Murphy K.; Rohren E.; Ryan D.P.; Saltz L.; Sharma S.; Shibata D.; Skibber J.M.; Jr W.S.; Sofocleous C.T.; Venook A.P.; Willett C.G.; Gregory K.M.; Freedman-Cass D.A. | 2013 |
| RIRS versus mPCNL for single renal stone of 2-3 cm: Clinical outcome and cost-effective analysis in Chinese medical setting                                                     | Pan J.; Chen Q.; Xue W.; Chen Y.; Xia L.; Chen H.; Huang Y.                                                                                                                                                                                                                                                                                                                                       | 2013 |
| Prevalence and risk factors for peri-implant disease in Belgian adults                                                                                                          | Marrone A.; Lasserre J.; Bercy P.; Brex M.C.                                                                                                                                                                                                                                                                                                                                                      | 2013 |
| The peri-implant health in patients attending an annual recall program: A clinical and microbiological study in 74 patients from the Tübingen Implant Registry                  | Lachmann S.; Stehberger A.; Axmann D.; Weber H.                                                                                                                                                                                                                                                                                                                                                   | 2013 |
| Probing at implants with peri-implantitis and its relation to clinical peri-implant bone loss                                                                                   | Serino G.; Turri A.; Lang N.P.                                                                                                                                                                                                                                                                                                                                                                    | 2013 |
| Long-term results of implant-supported over-dentures retained by double crowns: A practice-based retrospective study after minimally 10 years follow-up                         | Frisch E.; Ziebolz D.; Rinke S.                                                                                                                                                                                                                                                                                                                                                                   | 2013 |
| The effect of keratinized mucosa width on peri-implant health: a systematic review                                                                                              | Gobbato L.; Avila-Ortiz G.; Sohrabi K.; Wang C.-W.; Karimbux N.                                                                                                                                                                                                                                                                                                                                   | 2013 |
| Long-term effect of overdenture bar design on peri-implant tissues                                                                                                              | Lehmann K.M.; Kämmerer P.W.; Karbach J.; Scheller H.; Al-Nawas B.; Wagner W.                                                                                                                                                                                                                                                                                                                      | 2013 |
| The frequency of peri-implant diseases: A systematic review and meta-Analysis                                                                                                   | Atieh M.A.; Alsabeeha N.H.M.; Faggion Jr. C.M.; Duncan W.J.                                                                                                                                                                                                                                                                                                                                       | 2013 |
| The significance of keratinized mucosa on implant health: A systematic review                                                                                                   | Lin G.-H.; Chan H.-L.; Wang H.-L.                                                                                                                                                                                                                                                                                                                                                                 | 2013 |
| Peri-implantitis progression around thin sputtered hydroxyapatite-coated implants: clinical and radiographic evaluation in dogs                                                 | Madi M.; Zakaria O.; Noritake K.; Fuji M.; Kasugai S.                                                                                                                                                                                                                                                                                                                                             | 2013 |
| Treatment outcome in patients with peri-implantitis in a periodontal clinic: A retrospective study                                                                              | Lagervall M.; Jansson L.E.                                                                                                                                                                                                                                                                                                                                                                        | 2013 |
| Exfoliative cytology and titanium dental implants: A pilot study                                                                                                                | Olmedo D.G.; Nalli G.; Verdú S.; Paparella M.L.; Cabrini R.L.                                                                                                                                                                                                                                                                                                                                     | 2013 |
| Inflammatory implant periapical lesion prior to osseointegration: a case series study                                                                                           | Penarrocha-Diago M.; Maestre-Ferrín L.; Penarrocha-Oltra D.; Canullo L.; Piattelli A.; Penarrocha-Diago M.                                                                                                                                                                                                                                                                                        | 2013 |
| Clinical evaluation of marginal bone loss and stability in two types of submerged dental implants                                                                               | Gultekin B.A.; Gultekin P.; Leblebicioglu B.; Basegmez C.; Yalcin S.                                                                                                                                                                                                                                                                                                                              | 2013 |
| Implant-supported single tooth restoration in the aesthetic zone: Transmucosal and submerged healing provide similar outcome when simultaneous bone augmentation is needed      | Cordaro L.; Torsello F.; Chen S.; Ganeles J.; Brägger U.; Hämmerle C.                                                                                                                                                                                                                                                                                                                             | 2013 |
| Clinical performance and peri-implant parameters of 132 implants supporting locator-retained overdentures: a case series of 33 patients                                         | Troeltzsch M.; Troeltzsch V.; Brodine A.H.; Frankenberger R.; Messlinger K.; Troeltzsch M.                                                                                                                                                                                                                                                                                                        | 2013 |
| Treatment with implant-supported fixed dental prostheses in patients with congenital and acquired neurologic disabilities: a prospective study                                  | Eckfeldt A.; Zellmer M.; Carlsson G.E.                                                                                                                                                                                                                                                                                                                                                            | 2013 |
| Treatment of peri-implantitis around TiUnite-surface implants using Er:YAG laser microexplosions.                                                                               | Yamamoto A.; Tanabe T.                                                                                                                                                                                                                                                                                                                                                                            | 2013 |
| Significance of keratinized mucosa around dental implants: A prospective comparative study                                                                                      | Boynueğri D.; Nemli S.K.; Kasko Y.A.                                                                                                                                                                                                                                                                                                                                                              | 2013 |
| Long-term evaluation of Astra Tech and Brånemark implants in patients treated with full-arch bridges. Results after 12-15 years                                                 | Ravald N.; Dahlgren S.; Teiwik A.; Gröndahl K.                                                                                                                                                                                                                                                                                                                                                    | 2013 |
| Impact of implant surface topography: A clinical study with a mean functional loading time of 85 months                                                                         | Arnhart C.; Dvorak G.; Trefil C.; Huber C.; Watzek G.; Zechner W.                                                                                                                                                                                                                                                                                                                                 | 2013 |
| A cross-sectional study on the prevalence of marginal bone loss among implant patients                                                                                          | Cecchinato D.; Parpaiola A.; Lindhe J.                                                                                                                                                                                                                                                                                                                                                            | 2013 |
| Inpatient evaluation of periodontal, esthetic and inflammatory parameters around dental implants and natural teeth                                                              | Güncü G.N.; Büyüktepe G.; Aşkin S.B.; Kiliç K.; Tümer C.; Tözüm T.F.                                                                                                                                                                                                                                                                                                                              | 2013 |
| Combination Therapy Including Serratiopeptidase Improves Outcomes of Mechanical-Antibiotic Treatment of Periimplantitis                                                         | Sannino G.; Gigola P.; Puttini M.; Pera F.; Passariello C.                                                                                                                                                                                                                                                                                                                                        | 2013 |

|                                                                                                                                                                                                                                                      |                                                                                                                        |      |
|------------------------------------------------------------------------------------------------------------------------------------------------------------------------------------------------------------------------------------------------------|------------------------------------------------------------------------------------------------------------------------|------|
| Performance of the Straumann Bone Level Implant system for anterior single-tooth replacements in augmented and nonaugmented sites: A prospective cohort study with 60 consecutive patients                                                           | Santing H.J.; Raghoobar G.M.; Vissink A.; Den Hartog L.; Meijer H.J.A.                                                 | 2013 |
| Palatal positioning of implants in severely atrophic edentulous maxillae: five-year cross-sectional retrospective follow-up study                                                                                                                    | Peñarrocha-Oltra D.; Candel-Martí E.; Peñarrocha-Diogo M.; Martínez-González J.M.; Aragonese J.M.; Peñarrocha-Diogo M. | 2013 |
| The effect of glycine-powder airflow and hand instrumentation on peri-implant soft tissues: a split-mouth pilot study.                                                                                                                               | Mussano F.; Rovasio S.; Schierano G.; Baldi I.; Carossa S.                                                             | 2013 |
| Accuracy of enhancement filters in measuring in vitro peri-implant bone level                                                                                                                                                                        | de Azevedo Vaz S.L.; Neves F.S.; Figueirêdo E.P.; Haiter-Neto F.; Campos P.S.F.                                        | 2013 |
| A prospective, controlled clinical trial evaluating the clinical radiological and aesthetic outcome after 5 years of immediately placed implants in sockets exhibiting periapical pathology                                                          | Jung R.E.; Zaugg B.; Philipp A.O.H.; Truninger T.C.; Siegenthaler D.W.; Hämmerle C.H.F.                                | 2013 |
| Comparison of the effect of two interdental cleaning devices around implants on the reduction of bleeding: a 30-day randomized clinical trial.                                                                                                       | Magnuson B.; Harsono M.; Stark P.C.; Lyle D.; Kugel G.; Perry R.                                                       | 2013 |
| Immediate implant placement without bone grafting: A retrospective study of 110 cases with 5 years of follow-up                                                                                                                                      | Atalay B.; Öncü B.; Emes Y.; Bultan O.; Aybar B.; Yalçın S.                                                            | 2013 |
| The team approach to managing dental implant complications: strategies for treating peri-implantitis.                                                                                                                                                | Rosen P.S.                                                                                                             | 2013 |
| [Prophylaxis and treatment of periimplantitis].                                                                                                                                                                                                      | Mandzhavidze N.; Vadachkoria N.; Gumberidze N.                                                                         | 2013 |
| Induction of periimplantitis in dental implants                                                                                                                                                                                                      | Becker S.T.; Föge M.; Beck-Broichsitter B.E.; Gavrilova O.; Bolte H.; Rosenstiel P.; Wiltfang J.                       | 2013 |
| Long-term stability of contour augmentation with early implant placement following single tooth extraction in the esthetic zone: A prospective, cross-sectional study in 41 patients with a 5-to 9-year follow-up                                    | Buser D.; Chappuis V.; Bornstein M.M.; Wittneben J.-G.; Frei M.; Belser U.C.                                           | 2013 |
| Patient satisfaction and aesthetic outcome of implant-supported single-tooth replacements performed by dental students: a retrospective evaluation 8 to 12 years after treatment.                                                                    | Bonde M.J.; Stokholm R.; Schou S.; Isidor F.                                                                           | 2013 |
| Longevity of implant crowns and 2-unit cantilevered resin-bonded bridges                                                                                                                                                                             | Lam W.Y.H.; Botelho M.G.; McGrath C.P.J.                                                                               | 2013 |
| [Dental implants: a solution for lost dental elements].                                                                                                                                                                                              | Raghoobar G.M.; Meijer H.J.; Cune M.S.; Vissink A.                                                                     | 2013 |
| Posterior atrophic jaws rehabilitated with prostheses supported by 6 mm long 4 mm wide implants or by longer implants in augmented bone. One-year post-loading results from a pilot randomised controlled trial.                                     | Pistilli R.; Felice P.; Cannizzaro G.; Piatelli M.; Corvino V.; Barausse C.; Buti J.; Soardi E.; Esposito M.           | 2013 |
| Decontamination of dental implant surfaces by means of photodynamic therapy                                                                                                                                                                          | Marotti J.; Tortamano P.; Cai S.; Ribeiro M.S.; Franco J.E.M.; De Campos T.T.                                          | 2013 |
| Short implants with a nanometer-sized CaP surface provided with either a platform-switched or platform-matched abutment connection in the posterior region: A randomized clinical trial                                                              | Telleman G.; Meijer H.J.A.; Vissink A.; Raghoobar G.M.                                                                 | 2013 |
| Posterior atrophic jaws rehabilitated with prostheses supported by 5 x 5 mm implants with a novel nanostructured calcium-incorporated titanium surface or by longer implants in augmented bone. One-year results from a randomised controlled trial. | Pistilli R.; Felice P.; Piatelli M.; Gessaroli M.; Soardi E.; Barausse C.; Buti J.; Corvino V.                         | 2013 |
| Piezoelectric alveolar ridge-splitting technique with simultaneous implant placement: a cohort study with 2-year radiographic results                                                                                                                | Basseti R.; Basseti M.; Mericske-Stern R.; Enkling N.                                                                  | 2013 |
| The All-on-Four implant therapy protocol in the management of edentulous Chinese patients                                                                                                                                                            | Di P.; Lin Y.; Li J.-H.; Luo J.; Qiu L.; Chen B.; Cui H.                                                               | 2013 |
| Behavior of endosseous one-piece yttrium stabilized zirconia dental implants placed in posterior areas                                                                                                                                               | Borgonovo A.E.; Vavassori V.; Censi R.; Calvo J.L.; Re D.                                                              | 2013 |
| Immediate provisionalization of mini-implants with friction-engaging abutments in the mandibular anterior region: a 1-year retrospective study                                                                                                       | Choi K.; Yoon H.; Cho Y.                                                                                               | 2013 |
| A 3-year multicenter study of marginal bone level and soft tissue health of a 1-piece implant                                                                                                                                                        | Baer R.A.; Shanaman R.; Clark P.K.; Medley M.                                                                          | 2013 |
| Clinical and radiographic outcome of implants placed using stereolithographic guided surgery: a prospective monocenter study                                                                                                                         | D'haese J.; Vervaeke S.; Verbanck N.; De Bruyn H.                                                                      | 2013 |
| Clinical, radiographic, microbiological, and immunological outcomes of flapped vs. flapless dental implants: A prospective randomized controlled clinical trial                                                                                      | Tsoukaki M.; Kalpidis C.D.R.; Sakellari D.; Tsalikis L.; Mikrogorgis G.; Konstantinidis A.                             | 2013 |
| Long-term results after immediate loading of platform-switched implants in smokers versus nonsmokers with full-arch restorations                                                                                                                     | Romanos G.E.; Gaertner K.; Aydin E.; Nentwig G.-H.                                                                     | 2013 |
| The effect of healing abutment reconnection and disconnection on soft and hard peri-implant tissues: a short-term randomized controlled clinical trial                                                                                               | Koutouzis T.; Koutouzis G.; Gadalla H.; Neiva R.                                                                       | 2013 |
| Placement of implants with platform-switched Morse taper connections with the implant-abutment interface at different levels in relation to the alveolar crest: a short-term (1-year) randomized prospective controlled clinical trial               | Koutouzis T.; Neiva R.; Nonhoff J.; Lundgren T.                                                                        | 2013 |
| Peri-implant and periodontal tissues: a review of differences and similarities.                                                                                                                                                                      | Dhir S.; Mahesh L.; Kurtzman G.M.; Vandana K.L.                                                                        | 2013 |
| Preoperative gingival conditioning as a guide for implant installation and to achieve proper dentogingival contours                                                                                                                                  | de Jesus Tavarez R.R.; Malheiros A.S.; Benatti B.B.; Tonetto M.R.; Bandéca M.C.                                        | 2013 |
| The effect of platform switching on stress in peri-implant bone in a condition of marginal bone resorption: a three-dimensional finite element analysis                                                                                              | Xia H.; Wang M.; Ma L.; Zhou Y.; Li Z.; Wang Y.                                                                        | 2013 |
| How to manage a patient with peri-implantitis                                                                                                                                                                                                        | Hsu A.; Kim J.-W.M.                                                                                                    | 2013 |

|                                                                                                                                                                                                     |                                                                                                       |      |
|-----------------------------------------------------------------------------------------------------------------------------------------------------------------------------------------------------|-------------------------------------------------------------------------------------------------------|------|
| Iliac crest fresh-frozen allografts and autografts in maxillary and mandibular reconstruction: A histologic and histomorphometric evaluation                                                        | Chiapasco M.; Giammattei M.; Carmagnola D.; Autelitano L.; Rabbiosi D.; Dellavia C.                   | 2013 |
| Containment and contouring (CoCoon) technique: A biologically adequate approach to less invasive autogenous preimplant augmentation of bone                                                         | Gellrich N.-C.; Bormann K.-H.; Tehranchian S.; Kokemüller H.; Suarez-Cunqueiro M.M.                   | 2013 |
| The bony lid approach in pre-implant and implant surgery: a prospective study.                                                                                                                      | Khoury F.                                                                                             | 2013 |
| Clinical outcome and peri-implant findings of four-implant-supported distal cantilevered fixed mandibular prostheses: five-year results                                                             | Krennmair G.; Seemann R.; Weinländer M.; Krennmair S.; Piehslinger E.                                 | 2013 |
| The effect of implant surface modifications on survival and bone loss of immediately loaded implants in the edentulous mandible                                                                     | Vervaeke S.; Collaert B.; De Bruyn H.                                                                 | 2013 |
| Influence of transmucosal designs of dental implant on tissue regeneration in beagle dogs                                                                                                           | Kim W.-H.; Heo Y.-K.; Jeong C.-M.; Cho D.-W.; Ryu J.-J.; Huh J.-B.                                    | 2013 |
| Immediate loading of implants in the maxilla: survival and bone loss after at least 2 years in function.                                                                                            | Vervaeke S.; Collaert B.; De Bruyn H.                                                                 | 2013 |
| Dental management of the female patient                                                                                                                                                             | Otomo-Corgel J.                                                                                       | 2013 |
| Aesthetic analysis of an implant-supported denture at the cleft area                                                                                                                                | Filho J.F.F.; De Almeida A.L.P.F.                                                                     | 2013 |
| Closure of 1.5-cm alveolar oral antral fistula with intra-alveolar sinus membrane elevation and bone morphogenetic protein-2/collagen graft followed by dental implant restoration: case report     | Cottam J.R.; Jensen O.T.; Beatty L.; Ringeman J.                                                      | 2013 |
| A randomized controlled clinical trial of two types of tapered implants on immediate loading in the posterior maxilla and mandible                                                                  | Kim Y.-K.; Lee J.-H.; Lee J.-Y.; Yi Y.-J.                                                             | 2013 |
| Retrospective results of implants for partially edentulous posterior jaws according to time points of early loading                                                                                 | Kim J.-H.; Yang J.-Y.; Kim Y.-K.; Heo Y.-K.; Yeo I.-S.                                                | 2013 |
| Early-loaded one-stage implants retaining mandibular overdentures by two different mechanisms: 5-year results                                                                                       | Akça K.; Çavuşoğlu Y.; Sağırkaya E.; Çehrel M.C.                                                      | 2013 |
| A prospective, open-ended, single-cohort clinical trial on early loaded Titanium-zirconia alloy implants in partially edentulous patients: up-to-24-month results                                   | Akca K.; Cavusoglu Y.; Uysal S.; Cehrel M.C.                                                          | 2013 |
| Immediate versus conventional loading for the maxilla with implants placed into fresh and healed extraction sites to support a full-arch fixed prosthesis: nonrandomized controlled clinical study  | Peñarrocha-Oltra D.; Covani U.; Aparicio A.; Ata-Ali J.; Peñarrocha-Diogo M.; Peñarrocha-Diogo M.     | 2013 |
| Miniscrew design and bone response: defining a correlation                                                                                                                                          | Bhalla K.; Kalha A.S.                                                                                 | 2013 |
| A 5- to 8-year retrospective study comparing the clinical results of implant-supported telescopic crown versus bar overdentures in patients with edentulous maxillae                                | Zou D.; Wu Y.; Huang W.; Zhang Z.; Zhang Z.                                                           | 2013 |
| Complete regeneration of peri-implantitis-induced bony defects using guided bone regeneration is unpredictable                                                                                      | Elangovan S.                                                                                          | 2013 |
| A 3-year prospective clinical study of telescopic crown, bar, and locator attachments for removable four implant-supported maxillary overdentures                                                   | Zou D.; Wu Y.; Huang W.; Wang F.; Wang S.; Zhang Z.; Zhang Z.                                         | 2013 |
| Alterations in bone quality after socket preservation with grafting materials: a systematic review                                                                                                  | Chan H.-L.; Lin G.-H.; Fu J.-H.; Wang H.-L.                                                           | 2013 |
| Prosthetic soft tissue management following two periimplant graft failures: A clinical report                                                                                                       | Issarayangkul C.; Schoenbaum T.R.; McLaren E.A.                                                       | 2013 |
| Biomechanical effect of one session of low-level laser on the bone-titanium implant interface                                                                                                       | Boldrini C.; De Almeida J.M.; Fernandes L.A.; Ribeiro F.S.; Garcia V.G.; Theodoro L.H.; Pontes A.E.F. | 2013 |
| Comparison of plaque accumulation and soft-tissue blood flow with the use of full-arch implant-supported fixed prostheses with mucosal surfaces of different materials: A randomized clinical study | Kanao M.; Nakamoto T.; Kajiwara N.; Kondo Y.; Masaki C.; Hosokawa R.                                  | 2013 |
| Comparative clinical study of three-unit fixed partial prostheses supported by two or three implants                                                                                                | Yi Y.-J.; Lee J.-Y.; Kim Y.-K.                                                                        | 2013 |
| PTH [1-34] enhances bone response around titanium implants in a rabbit model of osteoporosis                                                                                                        | Almagro M.I.; Roman-Blas J.A.; Bellido M.; Castañeda S.; Cortez R.; Herrero-Beaumont G.               | 2013 |
| Correction of buccal dehiscence at the time of implant placement without barrier membranes: a retrospective cone beam computed tomographic study                                                    | Cortes A.R.; Cortes D.N.; Arita E.S.                                                                  | 2013 |
| Three-month cumulative incidence of thromboembolism and bleeding after periprocedural anticoagulation management of arterial vascular bypass patients                                               | Attaya H.; Wysokinski W.E.; Bower T.; Litin S.; Daniels P.R.; Slusser J.; Heit J.A.; Mcbane R.D.      | 2013 |
| What are the risks of prophylactic pinning to prevent contralateral slipped capital femoral epiphysis? Hip                                                                                          | Sankar W.N.; Novais E.N.; Lee C.; Al-Omari A.A.; Choi P.D.; Shore B.J.                                | 2013 |
| Risk factors for infection following total joint arthroplasty in rheumatoid arthritis                                                                                                               | Somayaji R.; Barnabe C.; Martin L.                                                                    | 2013 |
| Influence of prophylactic antibiotics on tissue integration versus bacterial colonization on poly(methyl methacrylate)                                                                              | Subbiahdoss G.; Aleyt T.; Kuijer R.; Busscher H.J.; van der Mei H.C.                                  | 2012 |
| Influence of surgical experience in the learning curve of a new approach in hip replacement: Anterior mini-invasive vs. standard lateral                                                            | Pogliacomini F.; Paraskevopoulos A.; Costantino C.; Marengi P.; Ceccarelli F.                         | 2012 |
| The incidence of peri-implantitis for two different implant systems over a period of thirteen years                                                                                                 | Renvert S.; Lindahl C.; Rutger Persson G.                                                             | 2012 |
| Peri-implantitis                                                                                                                                                                                    | Algraft H.; Borumandi F.; Cascarini L.                                                                | 2012 |
| Crestal bone loss and oral implants                                                                                                                                                                 | Albrektsson T.; Buser D.; Sennerby L.                                                                 | 2012 |



|                                                                                                                                                                                                                                           |                                                                                                                                                                                                                                                                     |      |
|-------------------------------------------------------------------------------------------------------------------------------------------------------------------------------------------------------------------------------------------|---------------------------------------------------------------------------------------------------------------------------------------------------------------------------------------------------------------------------------------------------------------------|------|
| Reasons for marginal bone loss around oral implants                                                                                                                                                                                       | Qian J.; Wennerberg A.; Albrektsson T.                                                                                                                                                                                                                              | 2012 |
| Dental implantation: An opportunity to stop smoking                                                                                                                                                                                       | Kadkhodazadeh M.; Amid R.; Mollaverdi F.; Amirbandeh O.                                                                                                                                                                                                             | 2012 |
| Prospective 10-year cohort study based on a randomized controlled trial (RCT) on implant-supported full-arch maxillary prostheses. Part 1: sandblasted and acid-etched implants and mucosal tissue                                        | Fischer K.; Stenberg T.                                                                                                                                                                                                                                             | 2012 |
| Accuracy of cone-beam computed tomography to assess the configuration and extent of ligature-induced peri-implantitis defects. A pilot study                                                                                              | Golubovic V.; Mihatovic I.; Becker J.; Schwarz F.                                                                                                                                                                                                                   | 2012 |
| Peri-implantitis prevalence and treatment in implant-oriented private practices: a cross-sectional postal and Internet survey.                                                                                                            | Schmidlin P.R.; Sahrman P.; Ramel C.; Imfeld T.; Müller J.; Roos M.; Jung R.E.                                                                                                                                                                                      | 2012 |
| Squamous cell carcinoma in association with dental implants: an assessment of previously hypothesized carcinogenic mechanisms and a case report.                                                                                          | Bhatavadekar N.B.                                                                                                                                                                                                                                                   | 2012 |
| 10-year survival and success rates of 511 titanium implants with a sandblasted and acid-etched surface: a retrospective study in 303 partially edentulous patients                                                                        | Buser D.; Janner S.F.; Wittneben J.-G.; Brägger U.; Ramseier C.A.; Salvi G.E.                                                                                                                                                                                       | 2012 |
| Immediate implant placement in molar regions: A 12-month prospective, randomized follow-up study                                                                                                                                          | Urban T.; Kostopoulos L.; Wenzel A.                                                                                                                                                                                                                                 | 2012 |
| Evaluation of soft tissues around single tooth implants in the anterior maxilla restored with cemented and screw-retained crowns.                                                                                                         | Cutrim E.S.; Peruzzo D.C.; Benatti B.                                                                                                                                                                                                                               | 2012 |
| Ten years later. Results from a prospective single-centre clinical study on 121 oxidized (TiUnite™) Brånemark implants in 46 patients                                                                                                     | Östman P.-O.; Hellman M.; Sennarby L.                                                                                                                                                                                                                               | 2012 |
| Cemented versus screw-retained implant-supported single-tooth crowns: a 10-year randomised controlled trial.                                                                                                                              | Vigolo P.; Mutinelli S.; Givani A.; Stellini E.                                                                                                                                                                                                                     | 2012 |
| A double-blind randomized controlled trial (RCT) of Titanium-13Zirconium versus Titanium Grade IV small-diameter bone level implants in edentulous mandibles--results from a 1-year observation period                                    | Al-Nawas B.; Brägger U.; Meijer H.J.; Naert I.; Persson R.; Perucchi A.; Quirynen M.; Raghoobar G.M.; Reichert T.E.; Romeo E.; Santing H.J.; Schimmel M.; Storelli S.; ten Bruggenkate C.; Vandekerckhove B.; Wagner W.; Wismeijer D.; Müller F.                    | 2012 |
| Microbial colonization in orthodontic mini-implants                                                                                                                                                                                       | de Freitas A.O.A.; Alviano C.S.; Alviano D.S.; Siqueira Jr. J.F.; Nojima L.I.; Nojima M.C.G.                                                                                                                                                                        | 2012 |
| 10-year follow-up of immediately loaded implants with TiUnite porous anodized surface                                                                                                                                                     | Degidi M.; Nardi D.; Piattelli A.                                                                                                                                                                                                                                   | 2012 |
| The experience of pain and patient satisfaction with dental implant-prosthetic treatment                                                                                                                                                  | Szymańska J.; Koszuta A.                                                                                                                                                                                                                                            | 2012 |
| Early peri-implant endosseous healing of two implant surfaces placed in surgically created circumferential defects. A histomorphometric and fluorescence study in dogs                                                                    | de Barros R.R.M.; Novaes A.B.; Queiroz A.; de Almeida A.L.G.                                                                                                                                                                                                        | 2012 |
| Immediate loading of single implants inserted flapless with medium or high insertion torque: a 6-month follow-up of a split-mouth randomised controlled trial.                                                                            | Cannizzaro G.; Leone M.; Ferri V.; Viola P.; Federico G.; Esposito M.                                                                                                                                                                                               | 2012 |
| Ultrasound imagery for dental implant diagnosis and treatment planning in a porcine model                                                                                                                                                 | Choi M.; Culjat M.O.; Singh R.S.; White S.N.                                                                                                                                                                                                                        | 2012 |
| [Use of erbium laser for treatment of dental implant complications].                                                                                                                                                                      | Kulakov A.A.; Khamraev T.K.; Kasparov A.S.; Amirov A.R.                                                                                                                                                                                                             | 2012 |
| The experience of pain and patient satisfaction with dental implant-prosthetic treatment                                                                                                                                                  | Szymańska J.; Koszuta A.                                                                                                                                                                                                                                            | 2012 |
| Osseointegrated dental implants in patients with intellectual disability: a pilot study.                                                                                                                                                  | Feijoo J.F.; Limeres J.; Diniz M.; Del Llano A.; Seoane J.; Diz P.                                                                                                                                                                                                  | 2012 |
| Outcome of the HORIZONS-AMI trial: Bivalirudin enhances long-term survival in patients with ST-elevation myocardial infarction undergoing angioplasty                                                                                     | Shah A.; Feldman D.N.                                                                                                                                                                                                                                               | 2012 |
| Incidence and multivariable correlates of long-term mortality in patients treated with surgical or percutaneous revascularization in the Synergy between Percutaneous Coronary Intervention with Taxus and Cardiac Surgery (SYNTAX) trial | Farooq V.; Serruys P.W.; Bourantas C.; Vranckx P.; Diletti R.; Garcia Garcia H.M.; Holmes D.R.; Kappetein A.-P.; MacK M.; Feldman T.; Morice M.C.; Colombo A.; Morel M.-A.; De Vries T.; Van Es G.A.; Steyerberg E.W.; Dawkins K.D.; Mohr F.W.; James S.; Stähle E. | 2012 |
| Transvenous implantation of the melody valve for bioprosthetic mitral and tricuspid valve dysfunction: A case series                                                                                                                      | Cullen M.W.; Cabalka A.K.; Alli O.O.; Pislaru S.V.; Sorajja P.; Nkomo V.T.; Cetta F.; Hagler D.J.; Rihal C.S.                                                                                                                                                       | 2012 |
| Six and twelve-month clinical and imaging results of the multicenter first-in-man biosolve-i study with the paclitaxel-eluting bioabsorbable magnesium scaffold (DREAMS)                                                                  | Haude M.; Erbel R.; Erne P.; Verheye S.; Vermeersch P.; Degen H.; Waksman R.; Weissman N.; Prati F.; Koolen J.                                                                                                                                                      | 2012 |
| The management of retrograde peri-implantitis: A case report                                                                                                                                                                              | Mohamed J.B.; Alam M.N.; Singh G.; Chandrasekaran S.C.                                                                                                                                                                                                              | 2012 |
| Multiple teeth replacement with endosseous one-piece yttrium-stabilized zirconia dental implants                                                                                                                                          | Borgonovo A.-E.; Fabbri A.; Vavassori V.; Censi R.; Maiorana C.                                                                                                                                                                                                     | 2012 |
| Two-year follow-up of early- and conventionally-placed two-stage implants supporting fixed prostheses.                                                                                                                                    | Bekcioglu B.; Sagirkaya E.; Karasoy D.; Cehreli M.                                                                                                                                                                                                                  | 2012 |
| Peri-implant marginal bone level: A systematic review and meta-analysis of studies comparing platform switching versus conventionally restored implants                                                                                   | Annibali S.; Bignozzi I.; Cristalli M.P.; Graziani F.; La Monaca G.; Polimeni A.                                                                                                                                                                                    | 2012 |
| Radiographic evaluation of marginal bone maintenance around tissue level implant and bone level implant: A randomised controlled trial. A 1-year follow-up                                                                                | Fernández-Formoso N.; Rilo B.; Mora M.J.; Martínez-Silva I.; Díaz-Afonso A.M.                                                                                                                                                                                       | 2012 |
| Factors associated with early and late failure of dental implants.                                                                                                                                                                        | Sakka S.; Baroudi K.; Nassani M.Z.                                                                                                                                                                                                                                  | 2012 |

|                                                                                                                                                                                                                                                            |                                                                                                                                                                                                                                     |      |
|------------------------------------------------------------------------------------------------------------------------------------------------------------------------------------------------------------------------------------------------------------|-------------------------------------------------------------------------------------------------------------------------------------------------------------------------------------------------------------------------------------|------|
| Bone density and miniscrew stability in orthodontic patients.                                                                                                                                                                                              | Samrit V.; Kharbanda O.P.; Duggal R.; Seith A.; Malhotra V.                                                                                                                                                                         | 2012 |
| Patient and implant survival following 4323 total hip replacements for acute femoral neck fracture: A retrospective cohort study using national joint registry data                                                                                        | Jameson S.S.; Kyle J.; Baker P.N.; Mason J.; Deehan D.J.; McMurtry I.A.; Reed M.R.                                                                                                                                                  | 2012 |
| Comparison of cardiac surgery with left atrial surgical ablation vs. cardiac surgery without atrial ablation in patients with coronary and/or valvular heart disease plus atrial fibrillation: Final results of the PRAGUE-12 randomized multicentre study | Budera P.; Straka Z.; Osmančík P.; Vaněk T.; Jelínek Š.; Hlavička J.; Fojt R.; Červinka P.; Hulman M.; Šmíd M.; Mal M.; Widimský P.                                                                                                 | 2012 |
| Prediction of arrhythmic events in ischemic and dilated cardiomyopathy patients referred for implantable cardiac defibrillator evaluation of multiple scar quantification measures for late gadolinium enhancement magnetic resonance imaging              | Gao P.; Yee R.; Gula L.; Krahn A.D.; Skanes A.; Leong-Sit P.; Klein G.J.; Stirrat J.; Fine N.; Pallaveshi L.; Wisenberg G.; Thompson T.R.; Prato F.; Drangova M.; White J.A.                                                        | 2012 |
| Is there a need for keratinized mucosa around implants to maintain health and tissue stability?                                                                                                                                                            | Wennström J.L.; Derks J.                                                                                                                                                                                                            | 2012 |
| A proposed classification for peri-implantitis.                                                                                                                                                                                                            | Froum S.J.; Rosen P.S.                                                                                                                                                                                                              | 2012 |
| Mucositis, peri-implantitis, implant success, and survival of implants in patients with treated generalized aggressive periodontitis: 3- to 16-year results of a prospective long-term cohort study                                                        | Swierkot K.; Lottholz P.; Flores-De-Jacoby L.; Mengel R.                                                                                                                                                                            | 2012 |
| Tenascin-C and Matrix Metalloproteinase-9 Levels in Crevicular Fluid of Teeth and Implants                                                                                                                                                                 | Özçakir-Tomruk C.; Chiquet M.; Merieske-Stern R.                                                                                                                                                                                    | 2012 |
| Gene Expression of Inflammation and Bone Healing in Peri-Implant Crevicular Fluid after Placement and Loading of Dental Implants. A Kinetic Clinical Pilot Study Using Quantitative Real-Time PCR                                                          | Slotte C.; Lennerås M.; Göthberg C.; Suska F.; Zoric N.; Thomsen P.; Nannmark U.                                                                                                                                                    | 2012 |
| Influence of etiologic factors in peri-implantitis: literature review and case report.                                                                                                                                                                     | Cortes A.R.; Ferraz P.; Tosta M.                                                                                                                                                                                                    | 2012 |
| Occlusal overload and bone/implant loss                                                                                                                                                                                                                    | Naert I.; Duyck J.; Vandamme K.                                                                                                                                                                                                     | 2012 |
| Peri-implant tissue destruction. The Third EAO Consensus Conference 2012                                                                                                                                                                                   | Klinge B.; Meyle J.; Claffey N.; Flemmig T.; Flemming I.; Mombelli A.; Naert I.; Renvert S.; Rocchietta I.; Schou S.; Schwarz F.; Teughels W.; Valentini P.; Wennerberg A.                                                          | 2012 |
| Biological complications and peri-implant clinical and radiographic changes at immediately placed dental implants. A prospective 5-year cohort study                                                                                                       | Rodrigo D.; Martin C.; Sanz M.                                                                                                                                                                                                      | 2012 |
| Bone Level Changes Around Axial and Tilted Implants in Full-Arch Fixed Immediate Restorations. Interim Results of a Prospective Study                                                                                                                      | Francetti L.; Romeo D.; Corbella S.; Taschieri S.; Del Fabbro M.                                                                                                                                                                    | 2012 |
| Relationship between smoking and bleeding on probing.                                                                                                                                                                                                      | de Souza J.G.; Bianchini M.A.; Ferreira C.F.                                                                                                                                                                                        | 2012 |
| Soft tissue response to zirconia and titanium implant abutments: An in vivo within-subject comparison                                                                                                                                                      | Van Brakel R.; Meijer G.J.; Verhoeven J.W.; Jansen J.; De Putter C.; Cune M.S.                                                                                                                                                      | 2012 |
| Titanium-zirconium alloy narrow-diameter implants (Straumann Roxolid®) for the rehabilitation of horizontally deficient edentulous ridges: Prospective study on 18 consecutive patients                                                                    | Chiapasco M.; Casentini P.; Zaniboni M.; Corsi E.; Anello T.                                                                                                                                                                        | 2012 |
| Immediate rehabilitation of the edentulous mandible with screw type implants: Results after up to 10 years of clinical function                                                                                                                            | Heschl A.; Payer M.; Platzer S.; Wegscheider W.; Pertl C.; Lorenzoni M.                                                                                                                                                             | 2012 |
| Are marginal bone levels and implant stability/mobility affected by single-stage platform switched dental implants? A comparative clinical study                                                                                                           | Dursun E.; Tulunoglu I.; Canpinar P.; Uysal S.; Akalin F.A.; Tözüm T.F.                                                                                                                                                             | 2012 |
| A systematic review of the survival and complication rates of implant-supported fixed dental prostheses (FDPs) after a mean observation period of at least 5 years                                                                                         | Pjetursson B.E.; Thoma D.; Jung R.; Zwahlen M.; Zembic A.                                                                                                                                                                           | 2012 |
| What is the optimal number of implants for removable reconstructions? A systematic review on implant-supported overdentures                                                                                                                                | Roccuzzo M.; Bonino F.; Gaudio L.; Zwahlen M.; Meijer H.J.A.                                                                                                                                                                        | 2012 |
| Metal concentrations in patients with failed metal-on-metal hip prostheses determine the inflammatory phenotype in peri-implant tissue                                                                                                                     | Paukkeri E.-L.; Korhonen R.; Eskelinen A.; Pesu M.; Vasama K.; Moilanen T.; Moilanen E.                                                                                                                                             | 2012 |
| Optimizing anterior esthetics of a single-tooth implant through socket augmentation and immediate provisionalization: A case report with 7-year follow-up                                                                                                  | Fu P.-S.; Wu Y.-M.; Wang J.-C.; Huang T.-K.; Chen W.-C.; Huang J.-W.; Hung C.-C.                                                                                                                                                    | 2012 |
| The effect of implant size 5 × 8 mm on crestal bone levels around single-tooth implants                                                                                                                                                                    | Urdaneta R.A.; Leary J.; Lubelski W.; Emanuel K.M.; Chuang S.-K.                                                                                                                                                                    | 2012 |
| Early implant bone loss: Preventable or inevitable?                                                                                                                                                                                                        | Tatarakis N.; Bashutski J.; Wang H.-L.; Oh T.-J.                                                                                                                                                                                    | 2012 |
| A single center experience of stenting in symptomatic intracranial atherosclerosis                                                                                                                                                                         | Castañó C.; García-Bermejo P.; García M.R.                                                                                                                                                                                          | 2012 |
| Obstructive jaundice as presenting symptom of small cell lung cancer                                                                                                                                                                                       | Niazi M.; De Las Casas L.; Assaly R.; Youssef W.                                                                                                                                                                                    | 2012 |
| Modern approach to the identification and elimination of periodontal infection                                                                                                                                                                             | Atanasovska-Stojanovska Dr. A.                                                                                                                                                                                                      | 2012 |
| Therapy of peri-implant diseases. Where is the evidence?                                                                                                                                                                                                   | Romanos G.E.; Weitz D.                                                                                                                                                                                                              | 2012 |
| Correlation between clinical parameters characterising peri-implant and periodontal health: A practice-based research in Spain in a series of patients with implants installed 4-5 years ago                                                               | Lopez-Piriz R.; Morales A.; Giménez M.-J.; Bowen A.; Carroquino R.; Aguilar L.; Corral I.; del Val C.; González I.; Ilzarbe L.-M.; Maestre J.-R.; Padullés E.; Torres-Lear F.; Granizo J.-J.; San-Román F.; Hernández S.; Prieto J. | 2012 |
| Short (5 and 7 mm long) porous implants in the posterior atrophic maxilla: a 5-year report of a prospective single-cohort study.                                                                                                                           | Perelli M.; Abundo R.; Corrente G.; Saccone C.                                                                                                                                                                                      | 2012 |
| Decontamination of titanium implant surface and re-osseointegration to treat peri-implantitis: a literature review.                                                                                                                                        | Subramani K.; Wismeijer D.                                                                                                                                                                                                          | 2012 |

|                                                                                                                                                                                                             |                                                                                                                           |      |
|-------------------------------------------------------------------------------------------------------------------------------------------------------------------------------------------------------------|---------------------------------------------------------------------------------------------------------------------------|------|
| Influence of placement depth on bone remodeling around tapered internal connection implant: A clinical and radiographic study in dogs                                                                       | Huang B.; Meng H.; Piao M.; Xu L.; Zhang L.; Zhu W.                                                                       | 2012 |
| Evaluation of 3- to 8-year treatment outcomes and success rates with 6 implant brands in partially edentulous patients.                                                                                     | Moeintaghavi A.; Radvar M.; Arab H.R.; Boostani H.R.; Ghiami E.                                                           | 2012 |
| Assessment of success for short dental implants (8mm) restored with single unit, non-splinted restorations                                                                                                  | Le B.T.; Follmar T.; Borzabadi-Farahani A.                                                                                | 2012 |
| Immediate loading of single post-extractive implants in the anterior maxilla: 12-month results from a multicenter clinical study.                                                                           | Grandi T.; Garuti G.; Samarani R.; Guazzi P.; Forabosco A.                                                                | 2012 |
| Adverse effects of BMP2 on bone formation and osseointegration                                                                                                                                              | Hyzy S.; Olivares-Navarrete R.; Boyan B.; Schwartz Z.                                                                     | 2012 |
| Evaluation of peri-implant bone resorption around Straumann Bone Level® implants placed in areas reconstructed with autogenous vertical onlay bone grafts                                                   | Chiapasco M.; Casentini P.; Zaniboni M.; Corsi E.                                                                         | 2012 |
| The effect of internal versus external abutment connection modes on crestal bone changes around dental implants: A radiographic analysis                                                                    | Koo K.-T.; Lee E.-J.; Kim J.-Y.; Seol Y.-J.; Han J.S.; Kim T.-I.; Lee Y.M.; Ku Y.; Wikesjö U.M.E.; Rhyu I.-C.             | 2012 |
| Reconstruction of the severely atrophic maxilla or acquired maxillary defects using zygomatic implants: Outcome Study of 41 implants                                                                        | Vega L.G.; Brewer K.                                                                                                      | 2012 |
| Safety and effectiveness of maxillary early loaded titanium implants with a novel nanostructured calcium-incorporated surface (Xpeed): 1-year results from a pilot multicenter randomised controlled trial. | Esposito M.; Grusovin M.G.; Pellegrino G.; Soardi E.; Felice P.                                                           | 2012 |
| Experimental custom-made zirconia abutments for narrow implants in esthetically demanding regions: a 5-year follow-up.                                                                                      | Vanlioglu B.A.; Özkan Y.; Evren B.; Özkan Y.K.                                                                            | 2012 |
| A within-implant comparison to evaluate the concept of platform switching: a randomised controlled trial.                                                                                                   | Vandeweghe S.; De Bruyn H.                                                                                                | 2012 |
| Long-term marginal bone loss in 217 machined-surface implants placed in 68 patients with 5 to 9 years of follow-up: a retrospective study.                                                                  | Mir-Mari J.; Mir-Orfila P.; Valmaseda-Castellón E.; Gay-Escoda C.                                                         | 2012 |
| Influence of hyperbaric oxygen therapy on peri-implant bone healing in rats with alloxan-induced diabetes                                                                                                   | Oliveira P.A.D.; Oliveira A.M.S.D.; Pablos A.B.; Costa F.O.; Silva G.A.B.; Santos J.N.D.; Cury P.R.                       | 2012 |
| Immediate rehabilitation of completely edentulous arches with a four-implant prosthesis concept in difficult conditions: an open cohort study with a mean follow-up of 2 years.                             | Malo P.; Nobre M.A.; Lopes A.                                                                                             | 2012 |
| Effect of the ridge preservation graft on posterior implant placement                                                                                                                                       | Schreiber G.M.; Maxfield M.; Lam D.                                                                                       | 2012 |
| Short dental implants: Indications and outcomes                                                                                                                                                             | Boffano P.; Smurra P.; Gallesio C.                                                                                        | 2012 |
| Reliability of computer designed surgical guides in six implant rehabilitations with two years follow-up.                                                                                                   | Giordano M.; Ausiello P.; Martorelli M.; Sorrentino R.                                                                    | 2012 |
| Medium-term clinical outcomes following trocar-guided mesh repair of vaginal prolapse using partially absorbable mesh                                                                                       | Lucente V.; Hinoul P.; Gauld J.; Jones P.C.; Khandwala S.; Van Drie D.M.; Cosson M.; Milani A.L.                          | 2012 |
| Percutaneous ASD Closure in a Large Australian Series: Short- and Long-Term Outcomes                                                                                                                        | Walters D.L.; Boga T.; Burstow D.; Scalia G.; Hourigan L.A.; Aroney C.N.                                                  | 2012 |
| Endovascular repair of an inflammatory abdominal aortic aneurysm causing bilateral ureteric obstruction                                                                                                     | McKenna A.J.; O'Donnell M.E.; Collins A.; Harkin D.W.                                                                     | 2012 |
| Carotid stenting should be offered to symptomatic patients instead of endarterectomy: Con                                                                                                                   | Taylor P.R.; Clough R.E.; Mani K.                                                                                         | 2012 |
| Prevalence of pre-operative anemia in elective orthopedic surgery patients                                                                                                                                  | Yazer M.H.; Barr T.M.; Chen A.F.; Waters J.H.; Silverman J.F.; Triulzi D.J.                                               | 2012 |
| Repair of a chronic high sleeve gastrectomy leak by revision to gastric bypass                                                                                                                              | Kim K.; Krzyzanowski S.; Buffington C.K.                                                                                  | 2012 |
| Acute traumatic rupture of the thoracic aorta. A contemporary, expectant management                                                                                                                         | Fox W.C.; Komorowski D.J.; Morano G.S.; Sydnor M.K.; Tisnado J.; Tisnado J.; Brinster D.R.                                | 2012 |
| Prospective cohort study of robotic sacrocolpopexy using lightweight polypropylene y-mesh                                                                                                                   | Culligan P.; Gurshumov E.L.; Komar J.; Priestley J.; Lewis C.M.; Salamon C.                                               | 2012 |
| Peri-implant marginal bone loss: an academic controversy or a clinical challenge?                                                                                                                           | Klinge B.                                                                                                                 | 2012 |
| Mechanical, chemical and laser treatments of the implant surface in the presence of marginal bone loss around implants.                                                                                     | Meyle J.                                                                                                                  | 2012 |
| The impact of the type and configuration of abutments and their (repeated) removal on the attachment level and marginal bone.                                                                               | Rompen E.                                                                                                                 | 2012 |
| Identifying occlusal overload and how to deal with it to avoid marginal bone loss around implants.                                                                                                          | Fu J.H.; Hsu Y.T.; Wang H.L.                                                                                              | 2012 |
| Surgical treatments of peri-implantitis.                                                                                                                                                                    | Mombelli A.; Moëne R.; Décaillot F.                                                                                       | 2012 |
| Working Group on the Treatment Options for the Maintenance of Marginal Bone Around Endosseous Oral Implants, Stockholm, Sweden, 8 and 9 September 2011. Consensus statements.                               | Esposito M.; Klinge B.; Meyle J.; Mombelli A.; Rompen E.; van Steenberghe D.; Van Dyke T.; Wang H.L.; van Winkelhoff A.J. | 2012 |
| Clinical success of implant-supported and tooth-implant-supported double crown-retained dentures                                                                                                            | Bernhart G.; Koob A.; Schmitter M.; Gabbert O.; Stober T.; Rammelsberg P.                                                 | 2012 |
| An introduction to the implant crown with an esthetic adhesive margin (ICEAM)                                                                                                                               | Wadhvani C.P.K.; Piñeyro A.; Akimoto K.                                                                                   | 2012 |
| Immediate loading of dental implants placed in severely resorbed edentulous maxillae reconstructed with le fort i osteotomy and interpositional bone grafting                                               | Pieri F.; Lizio G.; Bianchi A.; Corinaldesi G.; Marchetti C.                                                              | 2012 |
| Early outcome of an implant system with a resorbable adhesive calcium-phosphate coating-a prospective clinical study in partially dentate patients                                                          | Palarie V.; Bicer C.; Lehmann K.M.; Zahalka M.; Draenert F.G.; Kämmerer P.W.                                              | 2012 |
| Long-term outcomes of three types of implant-supported mandibular overdentures in smokers                                                                                                                   | Stoker G.; Van Waas R.; Wismeijer D.                                                                                      | 2012 |

|                                                                                                                                                                                                                                              |                                                                                                                      |      |
|----------------------------------------------------------------------------------------------------------------------------------------------------------------------------------------------------------------------------------------------|----------------------------------------------------------------------------------------------------------------------|------|
| Splinting osseointegrated implants and natural teeth in partially edentulous patients: a systematic review of the literature.                                                                                                                | Mamalis A.; Markopoulou K.; Kaloumenos K.; Analitis A.                                                               | 2012 |
| Treatment planning and sequence for implant therapy in a young adult with generalized aggressive periodontitis.                                                                                                                              | Bidra A.S.; Shaqman M.                                                                                               | 2012 |
| Clinical and radiographic outcome of dental implants supporting fixed prostheses: The relevance of cortical bone formation                                                                                                                   | Saulacic N.; Abboud M.; Pohl Y.; Wahl G.                                                                             | 2012 |
| Retrospective clinical evaluation of tapered implants: 10-year follow-up of delayed and immediate placement of maxillary implants                                                                                                            | Ormianer Z.; Piek D.; Livne S.; Lavi D.; Zafrir G.; Palti A.; Harel N.                                               | 2012 |
| Protocol for immediate implant replacement of infected teeth                                                                                                                                                                                 | Jofre J.; Valenzuela D.; Quintana P.; Asenjo-Lobos C.                                                                | 2012 |
| Peri-implant bone changes following tooth extraction, immediate placement and loading of implants in the edentulous maxilla                                                                                                                  | Barbier L.; Abeloos J.; de Clercq C.; Jacobs R.                                                                      | 2012 |
| Treatment planning of implants when 3 mandibular posterior teeth are missing: A 3-dimensional finite element analysis                                                                                                                        | Chen X.-Y.; Zhang C.-Y.; Nie E.-M.; Zhang M.-C.                                                                      | 2012 |
| Multicentre prospective randomised study of single-incision midurethral sling (SIMS- Adjust©) versus tension-free vaginal tapeobturator (TVT-OTM) in management of female stress urinary incontinence (SUI): A minimum of one year follow-up | Mostafa A.; Agur W.; Abdel-All M.; Guerrero K.; Lim C.; Allam M.; Yousef M.; N'dow J.; Abdel-Fattah M.               | 2012 |
| Impact of abutment material and dis-/re-connection on soft and hard tissue changes at implants with platform-switching                                                                                                                       | Becker K.; Mihatovic I.; Golubovic V.; Schwarz F.                                                                    | 2012 |
| Hemodialysis Vascular Access Dysfunction: Molecular Mechanisms and Treatment                                                                                                                                                                 | Mima A.                                                                                                              | 2012 |
| Peri-implantitis susceptibility as it relates to periodontal therapy and supportive care                                                                                                                                                     | Pjetursson B.E.; Helbling C.; Weber H.-P.; Matulienė G.; Salvi G.E.; Brägger U.; Schmidlin K.; Zwahlen M.; Lang N.P. | 2012 |
| A single-centre randomized controlled clinical trial on the adjunct treatment of intra-bony defects with autogenous bone or a xenograft: Results after 12 months                                                                             | Aghazadeh A.; Rutger Persson G.; Renvert S.                                                                          | 2012 |
| The effect of various topical peri-implantitis antiseptics on Staphylococcus epidermidis, Candida albicans, and Streptococcus sanguinis                                                                                                      | Bürgers R.; Witecy C.; Hahnel S.; Gosau M.                                                                           | 2012 |
| Accuracy of cone beam computed tomography in assessing peri-implant bone defect regeneration: A histologically controlled study in dogs                                                                                                      | Fienitz T.; Schwarz F.; Ritter L.; Dreiseidler T.; Becker J.; Rothamel D.                                            | 2012 |
| A pilot study to evaluate the success and survival rate of titanium-zirconium implants in partially edentulous patients: Results after 24 months of follow-up                                                                                | Barter S.; Stone P.; Brägger U.                                                                                      | 2012 |
| Oral rehabilitation of a patient with bruxism and cluster implant failures in the edentulous maxilla: A clinical report                                                                                                                      | Lin W.-S.; Ercoli C.; Lowenguth R.; Yerke L.M.; Morton D.                                                            | 2012 |
| Impact of platform switching on inter-proximal bone levels around short implants in the posterior region; 1-year results from a randomized clinical trial                                                                                    | Telleman G.; Raghoobar G.M.; Vissink A.; Meijer H.J.A.                                                               | 2012 |
| Osseointegration: The slow delivery of BMP-2 enhances osteoinductivity                                                                                                                                                                       | Hunziker E.B.; Enggist L.; Küffer A.; Buser D.; Liu Y.                                                               | 2012 |
| The dual-zone therapeutic concept of managing immediate implant placement and provisional restoration in anterior extraction sockets.                                                                                                        | Chu S.J.; Salama M.A.; Salama H.; Garber D.A.; Saito H.; Sarnachiaro G.O.; Tarnow D.P.                               | 2012 |
| One-year re-entry results of guided bone regeneration around immediately placed implants with immediate or conventional loading: a case series.                                                                                              | Shibly O.; Kutkut A.; Albandar J.M.                                                                                  | 2012 |
| Detection of crestal radiolucencies around dental implants: An in vitro experimental study                                                                                                                                                   | Sirin Y.; Horasan S.; Yaman D.; Basegmez C.; Tanyel C.; Aral A.; Guven K.                                            | 2012 |
| Extraoral implants in the rehabilitation of craniofacial defects: Implant and prosthesis survival rates and peri-implant soft tissue evaluation                                                                                              | Curi M.M.; Oliveira M.F.; Molina G.; Cardoso C.L.; De Groot Oliveira L.; Branemark P.-I.; De Cássia Braga Ribeiro K. | 2012 |
| Functional and clinical outcome of the using 4th generation large diameter ceramic couples. Alternative big balls                                                                                                                            | Raman R.; Johnson G.; Gopal S.; Shaw C.                                                                              | 2012 |
| Interventions for replacing missing teeth: treatment of peri-implantitis.                                                                                                                                                                    | Esposito M.; Grusovin M.G.; Worthington H.V.                                                                         | 2012 |
| Post-implant neuropathy of the trigeminal nerve. A case series.                                                                                                                                                                              | Renton T.; Dawood A.; Shah A.; Searson L.; Yilmaz Z.                                                                 | 2012 |
| Long-term dental implant success and survival - A clinical study after an observation period up to 6 years                                                                                                                                   | Charyeva O.; Altynbekov K.; Zhartybaev R.; Sabdanaliev A.                                                            | 2012 |
| Evaluation of periodontal and periimplant tissues in patients with dental implants                                                                                                                                                           | Legović R.; Aurer A.                                                                                                 | 2012 |
| Hierarchical decisions on teeth vs. implants in the periodontitis-susceptible patient: The modern dilemma                                                                                                                                    | Donos N.; Laurell L.; Mardas N.                                                                                      | 2012 |
| Transmission of Periodontopathic Bacteria from Natural Teeth to Implants                                                                                                                                                                     | Aoki M.; Takanashi K.; Matsukubo T.; Yajima Y.; Okuda K.; Sato T.; Ishihara K.                                       | 2012 |
| Systemic antibiotics and debridement of peri-implant mucositis. A randomized clinical trial                                                                                                                                                  | Hallström H.; Persson G.R.; Lindgren S.; Olofsson M.; Renvert S.                                                     | 2012 |
| [Clinical, microbiological and immunological findings in peri-implantitis patients with bar-retained lower removable partial dentures, compared to a healthy control group (12-month-follow-up)].                                            | Mesmer C.; Forster A.; Antal M.; Nagy K.                                                                             | 2012 |
| Treatment of peri-implantitis with deproteinised bovine bone and tetracycline: a case report.                                                                                                                                                | Park J.B.                                                                                                            | 2012 |
| Implant treatment in patients with oral lichen planus: A prospective-controlled study                                                                                                                                                        | Hernández G.; Lopez-Pintor R.M.; Arriba L.; Torres J.; de Vicente J.C.                                               | 2012 |
| Metagenomic analysis of the peri-implant and periodontal microflora in patients with clinical signs of gingivitis or mucositis                                                                                                               | Heuer W.; Kettenring A.; Stumpp S.N.; Eberhard J.; Gellermann E.; Winkel A.; Stiesch M.                              | 2012 |
| Single Implant Treatment in Healing versus Healed Sites of the Anterior Maxilla: A Clinical and Radiographic Evaluation                                                                                                                      | Eghbali A.; De Bruyn H.; De Rouck T.; Cleymaet R.; Wyn I.; Cosyn J.                                                  | 2012 |

|                                                                                                                                                                                                                     |                                                                                                                                                                       |      |
|---------------------------------------------------------------------------------------------------------------------------------------------------------------------------------------------------------------------|-----------------------------------------------------------------------------------------------------------------------------------------------------------------------|------|
| Survival and success rates of immediately and early loaded implants: 12-month results from a multicentric randomized clinical study.                                                                                | Grandi T.; Garuti G.; Guazzi P.; Tarabini L.; Forabosco A.                                                                                                            | 2012 |
| Comparison of variable-thread tapered implant designs to a standard tapered implant design after immediate loading. A 3-year multicentre randomised controlled trial.                                               | Amhart C.; Kielbassa A.M.; Martinez-de Fuentes R.; Goldstein M.; Jackowski J.; Lorenzoni M.; Maiorana C.; Mericske-Stern R.; Pozzi A.; Rompen E.; Sanz M.; Strub J.R. | 2012 |
| One-piece zirconia oral implants: One-year results from a prospective cohort study. 1. Single tooth replacement                                                                                                     | Kohal R.-J.; Knauf M.; Larsson B.; Sahlin H.; Butz F.                                                                                                                 | 2012 |
| Clinical and radiographic evaluation of immediately loaded one-piece implants placed into fresh extraction sockets.                                                                                                 | Soardi C.M.; Bianchi A.E.; Zandanel E.; Spinato S.                                                                                                                    | 2012 |
| Current knowledge and perspectives for the use of Platelet-Rich Plasma (PRP) and Platelet-Rich Fibrin (PRF) in oral and maxillofacial surgery part 2: Bone graft, implant and reconstructive surgery                | Simonpieri A.; Del Corso M.; Vervelle A.; Jimbo R.; Inchingolo F.; Sammartino G.; Dohan Ehrenfest D.M.                                                                | 2012 |
| The comparison of two techniques to increase the amount of peri-implant attached mucosa: free gingival grafts versus vestibuloplasty. One-year results from a randomised controlled trial.                          | Basegmez C.; Ersanli S.; Demirel K.; Bölükbasi N.; Yalcin S.                                                                                                          | 2012 |
| The effect of smoking on survival and bone loss of implants with a fluoride-modified surface: A 2-year retrospective analysis of 1106 implants placed in daily practice                                             | Vervaeke S.; Collaert B.; Vandeweghe S.; Cosyn J.; Deschepper E.; De Bruyn H.                                                                                         | 2012 |
| Pouch roll technique for implant soft tissue augmentation: a variation of the modified roll technique.                                                                                                              | Park S.H.; Wang H.L.                                                                                                                                                  | 2012 |
| A comparative Study between early occlusal loading at 1 and 6 weeks in implant-retained mandibular overdentures                                                                                                     | Gadallah A.A.; Youssef H.G.; Shawky Y.M.                                                                                                                              | 2012 |
| Histological analysis of soft and hard tissues in a periimplantitis lesion: A human case report                                                                                                                     | Jung S.-R.; Bashutski J.D.; Jandali R.; Prasad H.; Rohrer M.; Wang H.-L.                                                                                              | 2012 |
| Immediate versus early loading of 6.5 mm-long flapless-placed single implants: a 4-year after loading report of a split-mouth randomised controlled trial.                                                          | Cannizzaro G.; Felice P.; Leone M.; Ferri V.; Viola P.; Esposito M.                                                                                                   | 2012 |
| Identification of interleukin 2, 6, and 8 levels around miniscrews during orthodontic tooth movement                                                                                                                | Hamamci N.; Acun Kaya F.; Uysal E.; Yokuş B.                                                                                                                          | 2012 |
| Retrievable Metal Ceramic Implant-Supported Fixed Protheseses with Milled Titanium Frameworks and All-Ceramic Crowns: Retrospective Clinical Study with up to 10 Years of Follow-Up                                 | Maló P.; de Araújo Nobre M.; Borges J.; Almeida R.                                                                                                                    | 2012 |
| The Effect of Platelet-Rich Plasma on Healing of Palatal Donor Site following Connective Tissue Harvesting: A Pilot Study in Dogs                                                                                   | Shayesteh Y.S.; Eshghyar N.; Moslemi N.; Dehghan M.M.; Motahhary P.; Ghobadi Z.; Golestan B.                                                                          | 2012 |
| Cervical prosthesis and cervical spine mobility. Case study analysis with a 3 years minimum follow-up                                                                                                               | Pugliese R.; Lombardi F.; Butti G.; Bellantoni G.; Bongetta D.; Fratto A.; Adinolfi D.; Arienta C.                                                                    | 2012 |
| Cardiac complications in post PCI patients undergoing non cardiac surgery                                                                                                                                           | Ragoonanan T.; Syed S.; Wijesundera D.; Harsha P.; Beattie S.; Wasowicz M.                                                                                            | 2012 |
| The sex specificity of hip-joint muscles offers an explanation for better results in men after total hip arthroplasty                                                                                               | Preininger B.; Schmorl K.; Von Roth P.; Winkler T.; Matziolis G.; Perka C.; Tohtz S.                                                                                  | 2012 |
| Interventions for replacing missing teeth: management of soft tissues for dental implants.                                                                                                                          | Esposito M.; Maghaireh H.; Grusovin M.G.; Ziounas I.; Worthington H.V.                                                                                                | 2012 |
| ATTACHE: A phase III, multicenter, randomized comparison of chemotherapy given prior to and post surgical resection versus chemotherapy given post surgical resection for hepatic metastases from colorectal cancer | Fawcett J.; Sjoquist K.M.; Padbury R.; Christophi C.; Tebbutt N.C.; Charles H.C.P.; Gebiski V.; Wong N.; Aiken C.; Goldstein D.                                       | 2012 |
| Serial troponin-I measurement after elective percutaneous coronary intervention: Is it worth?                                                                                                                       | Sousa A.; Lebreiro A.; Sousa C.; Rangel I.; Lopes R.; Amorim S.; Martins E.; Campelo M.; Silva J.; Maciel M.J.                                                        | 2012 |
| Prevention of wear particle-induced osteolysis by a novel V-ATPase inhibitor saliphenylhalamide through inhibition of osteoclast bone resorption                                                                    | Qin A.; Cheng T.S.; Lin Z.; Cao L.; Chim S.M.; Pavlos N.J.; Xu J.; Zheng M.H.; Dai K.R.                                                                               | 2012 |
| Managing Peri-Implant Bone Loss: Current Understanding                                                                                                                                                              | Aljateeli M.; Fu J.-H.; Wang H.-L.                                                                                                                                    | 2012 |
| Seven-Year Follow-Up Results of TiUnite Implants Supporting Mandibular Overdentures: Early versus Delayed Loading                                                                                                   | Turkyilmaz I.; Tozum T.F.; Fuhrmann D.M.; Tumer C.                                                                                                                    | 2012 |
| Bactericidal effect of CO2 laser and Tigran brush on dental implant surfaces: A comparative in vitro study                                                                                                          | Sadighi M.; Pourabbas R.; Mobaiyen H.; Sadighi M.; Rikhtegaran S.; Fekrazad R.; Parviz S.                                                                             | 2012 |
| A 1-Year Prospective Study on Co-Axis® Implants Immediately Loaded with a Full Ceramic Crown                                                                                                                        | Vandeweghe S.; Cosyn J.; Thevissen E.; Van den Berghe L.; De Bruyn H.                                                                                                 | 2012 |
| Platform switching and matrix metalloproteinase-8 levels in peri-implant sulcular fluid                                                                                                                             | Canullo L.; Iannello G.; Netuschil L.; Jepsen S.                                                                                                                      | 2012 |
| Retrospective Comparison of Semipermanent and Permanent Cementation of Implant-Supported Single Crowns and FDPs with Regard to the Incidence of Survival and Complications                                          | Schwarz S.; Schröder C.; Corcodel N.; Hassel A.J.; Rammelsberg P.                                                                                                     | 2012 |
| The Effect of Maximum Bite Force, Implant Number, and Attachment Type on Marginal Bone Loss around Implants Supporting Mandibular Overdentures: A Retrospective Study                                               | Geckili O.; Mumcu E.; Bilhan H.                                                                                                                                       | 2012 |
| Four-Millimeter Implants Supporting Fixed Partial Dental Protheseses in the Severely Resorbed Posterior Mandible: Two-Year Results                                                                                  | Slotte C.; Grønningsaeter A.; Halmøy A.-M.; Öhrnell L.-O.; Stroh G.; Isaksson S.; Johansson L.-A.; Mordenfeld A.; Eklund J.; Embring J.                               | 2012 |
| Immediate Fixed Implant Rehabilitation of the Atrophic Edentulous Maxilla after Bilateral Sinus Floor Augmentation: A 12-Month Pilot Study                                                                          | Pieri F.; Aldini N.N.; Fini M.; Marchetti C.; Corinaldesi G.                                                                                                          | 2012 |
| A Comparison of Fit of CNC-Milled Titanium and Zirconia Frameworks to Implants                                                                                                                                      | Abduo J.; Lyons K.; Waddell N.; Bennani V.; Swain M.                                                                                                                  | 2012 |
| Tissue structure modification in late stage osteoarthritis is feasible                                                                                                                                              | Lafeber F.; Mastbergen S.                                                                                                                                             | 2012 |

|                                                                                                                                                                                                                     |                                                                                                                                                                                                        |      |
|---------------------------------------------------------------------------------------------------------------------------------------------------------------------------------------------------------------------|--------------------------------------------------------------------------------------------------------------------------------------------------------------------------------------------------------|------|
| Intracoronar mandibular Kennedy Class I implant-tooth supported removable partial overdenture: a 2-year multicenter prospective study.                                                                              | El Mekawy N.H.; El-Negoly S.A.; Grawish M.A.; El-Hawary Y.M.                                                                                                                                           | 2012 |
| Acute safety results from ACP European multicenter post-market observational Study                                                                                                                                  | Park J.W.; Sievert H.; Schillinger W.; Lickfett L.; Lopez-Minguez J.R.; Heyder O.; Valdes Chavarri M.; Hennen B.; Ormerod O.; Walsh K.; Neuzil P.; Schröder R.; Garcia E.; Hildick-Smith D.; Lezaun R. | 2012 |
| Comparative cost-effectiveness analysis of coflex interlaminar stabilization versus posterolateral fusion for lumbar stenosis and lowgrade spondylolisthesis                                                        | Auerbach J.; Zigler J.; Davis R.; Pettine K.; Yeung A.                                                                                                                                                 | 2012 |
| Steroids for the prevention of restenosis in bare metal stents - A systematic review and meta-analysis                                                                                                              | Chatterjee S.; Sardar P.; Mukherjee D.; Garratt K.                                                                                                                                                     | 2012 |
| Development of an index to assess disease-related damage in takayasu arteritis and use in outcome of vascular interventions                                                                                         | Sivakumar R.; Misra R.; Danda D.; Mahendranath K.M.; Bacon P.A.                                                                                                                                        | 2012 |
| Assessing real-world European patient profiles in the Helping Evaluate Reduction in Obesity (HERO) study                                                                                                            | Dixon J.B.; Nancy Dreyer N.; Finkelstein E.A.; Su Z.; Globe D.; Okerson T.                                                                                                                             | 2012 |
| Twelve-month clinical and angiographic results of the multicenter first-in-man BIOSOLVE-I study with the paclitaxel-eluting bioabsorbable magnesium scaffold                                                        | Haude M.; Erbel R.; Verheye S.; Waksman R.; Degen H.; Dirk B.; Vermeersch P.; Erne P.; Koolen J.                                                                                                       | 2012 |
| Efficacy and safety of extra-cranial carotid stent placement-a nation-wide case-series report                                                                                                                       | Lin J.W.; Chang C.-H.; Lai M.-S.                                                                                                                                                                       | 2012 |
| Evaluation of FactORs Impacting CLinical Outcome and Cost Effectiveness of the S-ICD: Design and rationale of the EFFORTLESS S-ICD registry                                                                         | Pedersen S.S.; Lambiasi P.; Boersma L.V.A.; Murgatroyd F.; Johansen J.B.; Reeve H.; Stuart A.G.; Adragao P.; Theuns D.A.M.J.                                                                           | 2012 |
| Endovascular treatment of middle cerebral artery aneurysm: Single center case series                                                                                                                                | Pandya D.; Lazzaro M.; Fitzsimmons B.-F.; Lynch J.; Zaidat O.                                                                                                                                          | 2012 |
| Effect of different localizations of microgap on clinical parameters and inflammatory cytokines in peri-implant crevicular fluid: A prospective comparative study                                                   | Boynueğri A.D.; Yalim M.; Nemli S.K.; Ergüder B.I.; Gökalp P.                                                                                                                                          | 2012 |
| Ten-year results of a three arms prospective cohort study on implants in periodontally compromised patients. Part 2: Clinical results                                                                               | Roccuzzo M.; Bonino F.; Aglietta M.; Dalmasso P.                                                                                                                                                       | 2012 |
| Soft Tissue Conditions and Marginal Bone Changes around Immediately Loaded Implants Inserted in Edentate Jaws Following Computer Guided Treatment Planning and Flapless Surgery: A ≥1-Year Clinical Follow-Up Study | Komiyama A.; Hultin M.; Näsström K.; Benchimol D.; Klinge B.                                                                                                                                           | 2012 |
| Peri-implant mucositis and peri-implantitis: commentary.                                                                                                                                                            | Feller L.; Khammissa R.A.; Meyerov R.; Lemmer J.                                                                                                                                                       | 2012 |
| Implant complications: risk evaluation, diagnosis, management and outcomes                                                                                                                                          | Peake G.G.                                                                                                                                                                                             | 2012 |
| Peri-implant soft tissue level secondary to a connective tissue graft in conjunction with immediate implant placement: a 2-year follow-up report of 11 consecutive cases.                                           | Lee Y.M.; Kim D.Y.; Kim J.Y.; Kim S.H.; Koo K.T.; Kim T.I.; Seol Y.J.                                                                                                                                  | 2012 |
| Long-Term Results of Endosteal Implants Following Radical Oral Cancer Surgery with and without Adjuvant Radiation Therapy                                                                                           | Linsen S.S.; Martini M.; Stark H.                                                                                                                                                                      | 2012 |
| Topical Application of Melatonin and Growth Hormone Accelerates Bone Healing around Dental Implants in Dogs                                                                                                         | Muñoz F.; López-Peña M.; Miño N.; Gómez-Moreno G.; Guardia J.; Cutando A.                                                                                                                              | 2012 |
| Comparison between graft and no-graft in an immediate placed and immediate nonfunctional loaded implant                                                                                                             | Spinato S.; Agnini A.; Chiesi M.; Agnini A.M.; Wang H.L.                                                                                                                                               | 2012 |
| Restoration of a peri-implant defect by platelet-rich fibrin                                                                                                                                                        | Lee J.-W.; Kim S.-G.; Kim J.-Y.; Lee Y.-C.; Choi J.-Y.; Dragos R.; Rotaru H.                                                                                                                           | 2012 |
| Influence of implants with different sizes and configurations installed immediately into extraction sockets on peri-implant hard and soft tissues: An experimental study in dogs                                    | Caneva M.; Botticelli D.; Rossi F.; Cardoso L.C.; Pantani F.; Lang N.P.                                                                                                                                | 2012 |
| Presence of aspartate aminotransferase in peri-implant crevicular fluid with and without mucositis.                                                                                                                 | Sánchez-Pérez A.; Moya-Villaescusa M.J.; Caffesse R.G.                                                                                                                                                 | 2012 |
| Marginal bone loss adjacent to conventional and immediate loaded two implants supporting a ball-retained mandibular overdenture: A 3-year randomized clinical trial                                                 | Elsyad M.A.; Al-Mahdy Y.F.; Fouad M.M.                                                                                                                                                                 | 2012 |
| Immediate loading of mandibular dental implants in partially edentulous patients: a prospective randomized comparative study.                                                                                       | Margossian P.; Mariani P.; Stephan G.; Margerit J.; Jorgensen C.                                                                                                                                       | 2012 |
| Removable four implant-supported mandibular overdentures rigidly retained with telescopic crowns or milled bars: A 3-year prospective study                                                                         | Krennmair G.; Sütö D.; Seemann R.; Piehslinger E.                                                                                                                                                      | 2012 |
| Crestal bone changes on platform-switched implants and adjacent teeth when the tooth-implant distance is less than 1.5 mm.                                                                                          | Vela X.; Méndez V.; Rodríguez X.; Segalá M.; Tarnow D.P.                                                                                                                                               | 2012 |
| Use of Covered Self Expandable Metal Stents (CSEMS) for endoscopic management of non-stricture related benign biliary diseases                                                                                      | Akbar A.; Baron T.H.; Irani S.; Topazian M.; Petersen B.T.; Gostout C.J.; Levy M.J.; Gan S.I.; Gluck M.; Ross A.S.; Kozarek R.A.                                                                       | 2012 |
| Guideline quandary in VTE prophylaxis management in elective joint replacement                                                                                                                                      | Prager J.                                                                                                                                                                                              | 2012 |
| Comparison of Ho: YAG laser and coblation for interface tissue removal in minimally invasive hip refixation procedures                                                                                              | Kraaij G.; Malan D.F.; van der Heide H.J.L.; Dankelman J.; Nelissen R.G.H.H.; Valstar E.R.                                                                                                             | 2012 |
| Collagen and 8-isoprostane are key factors of enhanced platelet aggregability observed in patients who underwent percutaneous coronary intervention                                                                 | Soontrapa S.; Nantsupawat T.; Simoni G.; Simoni J.; Roongsritong C.; Meyerrose G.; Kumar A.; Tech T.                                                                                                   | 2012 |
| Morphofunctional aspects of dental implants                                                                                                                                                                         | Meyer G.; Fanghänel J.; Proff P.                                                                                                                                                                       | 2012 |
| Residual periodontal pockets are a risk indicator for peri-implantitis in patients treated for periodontitis                                                                                                        | Cho-Yan Lee J.; Mattheos N.; Nixon K.C.; Ivanovski S.                                                                                                                                                  | 2012 |

|                                                                                                                                                                                                                   |                                                                                                                                                      |      |
|-------------------------------------------------------------------------------------------------------------------------------------------------------------------------------------------------------------------|------------------------------------------------------------------------------------------------------------------------------------------------------|------|
| Peri-implant mucositis and peri-implantitis: bacterial infection.                                                                                                                                                 | Khammissa R.A.; Feller L.; Meyerov R.; Lemmer J.                                                                                                     | 2012 |
| Porous titanium granules in the surgical treatment of peri-implant osseous defects: a randomized clinical trial.                                                                                                  | Wohlfahrt J.C.; Lyngstadaas S.P.; Rønold H.J.; Saxegaard E.; Ellingsen J.E.; Karlsson S.; Aass A.M.                                                  | 2012 |
| Three-year prospective multicenter study evaluating marginal bone levels and soft tissue health around a one-piece implant system.                                                                                | Finne K.; Rompen E.; Toljanic J.                                                                                                                     | 2012 |
| A new submerged split-thickness skin graft technique to rebuild peri-implant keratinized soft tissue in composite flap reconstructed mandible or maxilla                                                          | Fang W.; Ma W.; Ma W.-G.; Li D.-H.; Liu B.-L.                                                                                                        | 2012 |
| Clinical efficacy of a xenogeneic collagen matrix in augmenting keratinized mucosa around implants: A randomized controlled prospective clinical trial                                                            | Lorenzo R.; García V.; Orsini M.; Martin C.; Sanz M.                                                                                                 | 2012 |
| Implant crest module: A review of biomechanical considerations                                                                                                                                                    | Aparna I.N.; Dhanasekar B.; Lingeshwar D.; Gupta L.                                                                                                  | 2012 |
| Ten-year retrospective follow-up study of the TiOblast™ dental implant                                                                                                                                            | Al-Nawas B.; Kämmerer P.W.; Morbach T.; Ladwein C.; Wegener J.; Wagner W.                                                                            | 2012 |
| Nasal floor augmentation for the reconstruction of the atrophic maxilla: A case series                                                                                                                            | El-Ghareeb M.; Pi-Anfruns J.; Khosousi M.; Aghaloo T.; Moy P.                                                                                        | 2012 |
| A 10-year prospective study of single tooth implants placed in the anterior maxilla                                                                                                                               | Gotfredsen K.                                                                                                                                        | 2012 |
| A randomized, controlled clinical evaluation of a synthetic gel membrane for guided bone regeneration around dental implants: clinical and radiologic 1- and 3-year results.                                      | Ramel C.F.; Wismeijer D.A.; Hämmerle C.H.; Jung R.E.                                                                                                 | 2012 |
| Immediate positioning of definitive abutments versus repeated abutment replacements in immediately loaded implants: effects on bone healing at the 1-year follow-up of a multicentre randomised controlled trial. | Grandi T.; Guazzi P.; Samarani R.; Garuti G.                                                                                                         | 2012 |
| Soft tissue remodeling technique as a non-invasive alternative to second implant surgery.                                                                                                                         | Vela X.; Méndez V.; Rodríguez X.; Segalà M.; Gil J.A.                                                                                                | 2012 |
| Immediate loading of two unsplinted implants retaining the existing complete mandibular denture in elderly edentulous patients: 1-year results from a multicentre prospective cohort study.                       | Grandi T.; Guazzi P.; Samarani R.; Garuti G.; Grandi G.                                                                                              | 2012 |
| Changes in the fractal dimension on pre- and post-implant panoramic radiographs                                                                                                                                   | Sansare K.; Singh D.; Karjodkar F.                                                                                                                   | 2012 |
| Effect of mismatching abutments on implants with wider platforms - an experimental study in dogs                                                                                                                  | Baffone G.M.; Botticelli D.; Canullo L.; Scala A.; Beolchini M.; Lang N.P.                                                                           | 2012 |
| Acute traumatic rupture of the thoracic aorta: Contemporary expectant management                                                                                                                                  | Fox W.C.; Komorowski D.J.; Morano G.S.; Sydnor M.K.; Tisnado J.; Brinster D.                                                                         | 2012 |
| Clinical research on peri-implant diseases: Consensus report of Working Group 4                                                                                                                                   | Sanz M.; Chapple I.L.                                                                                                                                | 2012 |
| Impact of the outcome of guided bone regeneration in dehiscence-type defects on the long-term stability of peri-implant health: Clinical observations at 4 years                                                  | Schwarz F.; Sahm N.; Becker J.                                                                                                                       | 2012 |
| Peri-implant disease in subjects with and without preventive maintenance: A 5-year follow-up                                                                                                                      | Costa F.O.; Takenaka-Martinez S.; Cota L.O.M.; Ferreira S.D.; Silva G.L.M.; Costa J.E.                                                               | 2012 |
| Long-term follow-up of turned single implants placed in periodontally healthy patients after 16-22 years: Radiographic and peri-implant outcome                                                                   | Dierens M.; Vandeweghe S.; Kisch J.; Nilner K.; de Bruyn H.                                                                                          | 2012 |
| Anti-infective surgical therapy of peri-implantitis. A 12-month prospective clinical study                                                                                                                        | Heitz-Mayfield L.J.A.; Salvi G.E.; Mombelli A.; Faddy M.; Lang N.P.                                                                                  | 2012 |
| Quality assessment of reporting of animal studies on pathogenesis and treatment of peri-implant mucositis and peri-implantitis. A systematic review using the ARRIVE guidelines                                   | Schwarz F.; Iglhaut G.; Becker J.                                                                                                                    | 2012 |
| Clinical research in implant dentistry: Study design, reporting and outcome measurements: Consensus report of Working Group 2 of the VIII European Workshop on Periodontology                                     | Tonetti M.; Palmer R.                                                                                                                                | 2012 |
| Successful management of peri-implantitis with a regenerative approach: a consecutive series of 51 treated implants with 3- to 7.5-year follow-up.                                                                | Froum S.J.; Froum S.H.; Rosen P.S.                                                                                                                   | 2012 |
| Spontaneous progression of experimental peri-implantitis at implants with different surface characteristics: An experimental study in dogs                                                                        | Albouy J.-P.; Abrahamsson I.; Berglundh T.                                                                                                           | 2012 |
| Reversibility of experimental peri-implant mucositis compared with experimental gingivitis in humans                                                                                                              | Salvi G.E.; Aglietta M.; Eick S.; Sculean A.; Lang N.P.; Ramseier C.A.                                                                               | 2012 |
| Immediate implant placement in molar regions: Risk factors for early failure                                                                                                                                      | Urban T.; Kostopoulos L.; Wenzel A.                                                                                                                  | 2012 |
| The critical-size supraalveolar peri-implant defect model: Characteristics and use                                                                                                                                | Wikesjö U.M.; Susin C.                                                                                                                               | 2012 |
| Local delivery of antimicrobial peptides using self-organized TiO <sub>2</sub> nanotube arrays for peri-implant infections                                                                                        | Ma M.; Kazemzadeh-Narbat M.; Hui Y.; Lu S.; Ding C.; Chen D.D.; Hancock R.E.; Wang R.                                                                | 2012 |
| Dental implant failure associated with bacterial infection and long-term bisphosphonate usage: A case report                                                                                                      | Yuan K.; Chen K.-C.; Chan Y.-J.; Tsai C.-C.; Chen H.-H.; Shih C.-C.                                                                                  | 2012 |
| Submerged and transmucosal healing yield the same clinical outcomes with two-piece implants in the anterior maxilla and mandible: Interim 1-year results of a randomized, controlled clinical trial               | Hämmerle C.H.F.; Jung R.E.; Sanz M.; Chen S.; Martin W.C.; Jackowski J.; Ivanoff C.-J.; Cordaro L.; Ganeles J.; Weingart D.; Wiltfang J.; Gahlert M. | 2012 |
| Influence of prognostic risk indicators on osseointegrated dental implant failure: a matched case-control analysis.                                                                                               | Alissa R.; Oliver R.J.                                                                                                                               | 2012 |
| Peri-implant bone reactions to immediate implants placed at different levels in relation to crestal bone. Part II: A pilot study in dogs                                                                          | Negri B.; Calvo-Guirado J.L.; Ramírez-Fernández M.P.; Maté Sánchez-de Val J.; Guardia J.; Muñoz-Guzón F.                                             | 2012 |
| A critical comparison of pre-clinical animal models for analyzing peri-implant hard tissue                                                                                                                        | Stübinger S.; Dard M.                                                                                                                                | 2012 |

|                                                                                                                                                                             |                                                                                                                                            |      |
|-----------------------------------------------------------------------------------------------------------------------------------------------------------------------------|--------------------------------------------------------------------------------------------------------------------------------------------|------|
| Buccal bone plate in the immediately placed and restored maxillary single implant: A 7-year retrospective study using computed tomography                                   | Degidi M.; Nardi D.; Dapirle G.; Piattelli A.                                                                                              | 2012 |
| Peri-implant bone reactions to immediate implants placed at different levels in relation to crestal bone. Part I: A pilot study in dogs                                     | Negri B.; Calvo-Guirado J.L.; Pardo-Zamora G.; Ramírez-Fernández M.P.; Delgado-Ruiz R.A.; Muñoz-Guzón F.                                   | 2012 |
| Bone response between platform switched implants in mini pigs                                                                                                               | Elia N.                                                                                                                                    | 2012 |
| Sustained release of adiponectin improves osteogenesis around hydroxyapatite implants by suppressing osteoclast activity in ovariectomized rabbits                          | Luo E.; Hu J.; Bao C.; Li Y.; Tu Q.; Murray D.; Chen J.                                                                                    | 2012 |
| Clinical and imaging outcomes for target aneurysm retreatment for remnant intracranial aneurysm                                                                             | Pandya D.J.; Issa M.A.; Lazzaro M.A.; Sweis R.; Taqi M.; Abraham M.; Gheith A.; Lynch J.R.; Zaidat O.O.                                    | 2012 |
| Retrospective and descriptive study for aneurysms-anesthesia aspekt                                                                                                         | Majstorovic B.M.; Kastratovic D.A.; Vukasinovic D.I.; Nestorovic D.B.                                                                      | 2012 |
| Specialists' management decisions and attitudes towards mucositis and peri-implantitis                                                                                      | Mattheos N.; Collier S.; Walmsley A.D.                                                                                                     | 2012 |
| Sem evaluation of 10 infected implants retrieved from man                                                                                                                   | Brunelli G.; Carinci F.; Zollino I.; Candotto V.; Scarano A.; Lauritano D.                                                                 | 2012 |
| Guidance for the maintenance care of dental implants: clinical review                                                                                                       | Todescan S.; Lavigne S.; Kelekis-Cholakakis A.                                                                                             | 2012 |
| The role of keratinized mucosa in peri-implant health                                                                                                                       | Esper L.A.; Ferreira Jr. S.B.; Kaizer R.D.O.F.; De Almeida A.L.P.F.                                                                        | 2012 |
| Patient satisfaction after prosthetic rehabilitation of bone-grafted alveolar clefts with nonsubmerged ITI Straumann dental implants loaded at three months                 | Landes C.A.; Buñdgen L.; Laudemann K.; Ghanaati S.; Sader R.                                                                               | 2012 |
| Surface analysis of failed oral titanium implants after irradiated with ErCR:YSGG 2780 laser                                                                                | Scarano A.; Sinjari B.; Diiorio D.; Murmura G.; Carinci F.; Lauritano D.                                                                   | 2012 |
| Immediately restored one-piece single-tooth implants with reduced diameter: One-year results of a multi-center study                                                        | Zembić A.; Johannesen L.H.; Schou S.; Malo P.; Reichert T.; Farella M.; Hämmerle C.H.F.                                                    | 2012 |
| Peri-implant bone remodeling around an extraction socket: predictions of bone maintenance by finite element method                                                          | Chou H.-Y.; Romanos G.; Müftü A.; Müftü S.                                                                                                 | 2012 |
| Single-flap approach for surgical debridement of deep intraosseous defects: A randomized controlled trial                                                                   | Trombelli L.; Simonelli A.; Schincaglia G.P.; Cucchi A.; Farina R.                                                                         | 2012 |
| Prevalence of complications after the oral rehabilitation with implant-supported hybrid prostheses                                                                          | Real-Osuna J.; Almendros-Marqués N.; Gay-Escoda C.                                                                                         | 2012 |
| Clinical outcomes of single dental implants with external connections: results after 2 to 13 years                                                                          | Camargos Gd.e V.; do Prado C.J.; das Neves F.D.; Sartori I.A.                                                                              | 2012 |
| Immediate provisionalization of 3.0-mm-diameter implants replacing single missing maxillary and mandibular incisors: 1-year prospective study.                              | Oyama K.; Kan J.Y.; Rungcharassaeng K.; Lozada J.                                                                                          | 2012 |
| Immediate loading of mandibular overdentures supported by unsplinted direct laser metal-forming implants: Results from a 1-year prospective study                           | Mangano C.; Mangano F.G.; Shibli J.A.; Ricci M.; Perrotti V.; D'Avila S.; Piattelli A.                                                     | 2012 |
| Implant-supported first molar restorations: correlation of finite element analysis with clinical outcomes.                                                                  | Ormianer Z.; Palti A.; Demiralp B.; Heller G.; Lewinstein I.; Khayat P.G.                                                                  | 2012 |
| Prospective clinical evaluation of 201 direct laser metal forming implants: Results from a 1-year multicenter study                                                         | Mangano C.; Mangano F.; Shibli J.A.; Luongo G.; De Franco M.; Briguglio F.; Figliuzzi M.; Eccellente T.; Rapani C.; Piombino M.; MacChi A. | 2012 |
| Establishment of the epithelial attachment and connective tissue adaptation to implants installed under the concept of "platform switching": A histologic study in minipigs | Farronato D.; Santoro G.; Canullo L.; Botticelli D.; Maiorana C.; Lang N.P.                                                                | 2012 |
| Peri-implant hard tissue response to glow-discharged abutments: Prospective study. Preliminary radiological results                                                         | Canullo L.; Götz W.                                                                                                                        | 2012 |
| Soft-tissue healing and impression technique in implant dentistry: A case report                                                                                            | Varvara G.; Caputi S.; D'Arcangelo C.; Murmura G.                                                                                          | 2012 |
| Short dental implants: A systematic review                                                                                                                                  | Annibali S.; Cristalli M.P.; Dell'Aquila D.; Bignozzi I.; La Monaca G.; Pilloni A.                                                         | 2012 |
| Clinical and radiologic evaluation of 70 immediately loaded single implants in the maxillary esthetic zone: preliminary results after 1 year of functional loading.         | Di Alberti L.; Donnini F.; Di Alberti C.; Camerino M.; Sgaramella N.; Lo Muzio L.                                                          | 2012 |
| Injectable magnesium-enriched hydroxyapatite putty in peri-implant defects: a histomorphometric analysis in pigs.                                                           | Crespi R.; Cappare P.; Addis A.; Gherlone E.                                                                                               | 2012 |
| Effect of implant surface properties on peri-implant bone healing: implant stability and microcomputed tomographic analysis.                                                | Al-Hamdan S.H.; Al-Hamdan K.; Junker R.; Jansen J.A.                                                                                       | 2012 |
| Trans-sinus dental implants, bone morphogenetic protein 2, and immediate function for all-on-4 treatment of severe maxillary atrophy                                        | Jensen O.T.; Cottam J.; Ringeman J.; Adams M.                                                                                              | 2012 |
| Stability and marginal bone loss with three types of early loaded implants during the first year after loading.                                                             | Liaje A.; Ozkan Y.K.; Ozkan Y.; Vanlioğlu B.                                                                                               | 2012 |
| The microvascular corticocancellous femur flap for reconstruction of the anterior maxilla in adult cleft lip, palate, and alveolus patients                                 | Gaggl A.; Bürger H.; Virnik S.; Schachner P.; Chiari F.                                                                                    | 2012 |
| FGF18 augments osseointegration of intra-medullary implants in osteopenic FGFR3-/- mice                                                                                     | Carli A.; Gao C.; Khayyat-Kholghi M.; Li A.; Wang H.; Ladel C.; Harvey E.J.; Henderson J.E.                                                | 2012 |
| Effect of the platform-switching technique on preservation of peri-implant marginal bone: a systematic review.                                                              | Al-Nsour M.M.; Chan H.L.; Wang H.L.                                                                                                        | 2012 |
| Does obesity influence clinical outcome at nine years following total knee replacement?                                                                                     | Collins R.A.; Walmsley P.J.; Amin A.K.; Brenkel I.J.; Clayton R.A.E.                                                                       | 2012 |
| Current guidelines for endoscopy in patients receiving antithrombotic medication                                                                                            | Khor C.J.L.; Hartono J.L.                                                                                                                  | 2012 |



|                                                                                                                                                                                                                                              |                                                                                                                                                                               |      |
|----------------------------------------------------------------------------------------------------------------------------------------------------------------------------------------------------------------------------------------------|-------------------------------------------------------------------------------------------------------------------------------------------------------------------------------|------|
| A multicentre prospective randomised study of single-incision mini-sling (Ajust®) versus tension-free vaginal tape-obturator (TVT-OTM) in the management of female stress urinary incontinence: Pain profile and short-term outcomes         | Mostafa A.; Agur W.; Abdel-All M.; Guerrero K.; Lim C.; Allam M.; Yousef M.; N'Dow J.; Abdel-Fattah M.                                                                        | 2012 |
| Correlation between different genotypes of human cytomegalovirus and Epstein-Barr virus and peri-implant tissue status                                                                                                                       | Jankovic S.; Aleksic Z.; Dimitrijevic B.; Lekovic V.; Milinkovic I.; Kenney B.                                                                                                | 2011 |
| Short (5 and 7 mm long) porous implant in the posterior atrophic mandible: a 5-year report of a prospective study.                                                                                                                           | Perelli M.; Abundo R.; Corrente G.; Saccone C.                                                                                                                                | 2011 |
| The peri-implant sulcus compared with internal implant and suprastructure components: A microbiological analysis                                                                                                                             | Cosyn J.; van Aelst L.; Collaert B.; Persson G.R.; de Bruyn H.                                                                                                                | 2011 |
| Dental implant outcome after primary implantation into double-barreled fibula osteoseptocutaneous free flap-reconstructed mandible.                                                                                                          | Chang Y.M.; Wallace C.G.; Tsai C.Y.; Shen Y.F.; Hsu Y.M.; Wei F.C.                                                                                                            | 2011 |
| Effects of flapless implant surgery on soft tissue profiles: A prospective clinical study                                                                                                                                                    | Lee D.-H.; Choi B.-H.; Jeong S.-M.; Xuan F.; Kim H.-R.                                                                                                                        | 2011 |
| Ethical issues in replacing a periodontally involved tooth with dental implants: Thoughts, beliefs, and evidence                                                                                                                             | Levin L.                                                                                                                                                                      | 2011 |
| Clinician- and patient-reported long-term evaluation of screw- and cement-retained implant restorations: A 5-year prospective study                                                                                                          | Sherif S.; Susarla S.M.; Hwang J.-W.; Weber H.-P.; Wright R.F.                                                                                                                | 2011 |
| Guided bone regeneration with and without a bone substitute at single post-extractive implants: 1-year post-loading results from a pragmatic multicentre randomised controlled trial.                                                        | De Angelis N.; Felice P.; Pellegrino G.; Camurati A.; Gambino P.; Esposito M.                                                                                                 | 2011 |
| Patient-related risk factors for implant therapy. A critique of pertinent literature                                                                                                                                                         | Liddelow G.; Klineberg I.                                                                                                                                                     | 2011 |
| A 3-year post-loading report of a randomised controlled trial on the rehabilitation of posterior atrophic mandibles: short implants or longer implants in vertically augmented bone?                                                         | Esposito M.; Cannizarro G.; Soardi E.; Pellegrino G.; Pistilli R.; Felice P.                                                                                                  | 2011 |
| Summary of current consensus on the effect of smoking on implant therapy.                                                                                                                                                                    | Snider T.N.; Cottrell D.; Batal H.                                                                                                                                            | 2011 |
| Undersized implant site preparation to enhance primary implant stability in poor bone density: A prospective clinical study                                                                                                                  | Alghamdi H.; Anand P.S.; Anil S.                                                                                                                                              | 2011 |
| Osseointegration of Cobalt-chrome alloy implants                                                                                                                                                                                             | Mavrogenis A.F.; Papagelopoulos P.J.; Babis G.C.                                                                                                                              | 2011 |
| Maxillary sinus floor augmentation using bovine bone grafts with simultaneous implant placement: A 5-year prospective follow-up study                                                                                                        | Özkan Y.; Akoğlu B.; Kulak-Özkan Y.                                                                                                                                           | 2011 |
| Peri-prosthetic joint infection - A diagnostic and treatment hospital analysis                                                                                                                                                               | Cismăi R.S.; Vasile L.                                                                                                                                                        | 2011 |
| Carotid endarterectomy is more cost-effective than carotid artery stenting                                                                                                                                                                   | Sternbergh W.C.; Crenshaw G.D.; Smith T.A.; Bazan H.A.                                                                                                                        | 2011 |
| Pre-operative transfusion reduces serious adverse events in patients with Sickle Cell Disease (SCD): Results from the Transfusion Alternatives Preoperatively in Sickle Cell Disease (TAPS) randomised controlled multicentre clinical trial | Howard J.; Malfroy M.; Charlotte L.; Choo L.; Rees D.; Walker I.; Johnson T.; Tillyer L.; Fijnvandraat K.; Kirby-Allen M.; Hodge R.; Purohit S.; Davies S.C.; Williamson L.M. | 2011 |
| Clinical outcomes of peri-procedural myocardial infarction after intracoronary stent implantation for bifurcation lesion: Results from coronary bifurcation stenting registry (COBIS)                                                        | Park K.-H.; Ahn Y.; Jeong H.C.; Kim H.-S.; Seong I.-W.; Yang J.-Y.; Rha S.W.; Jang Y.; Yoon J.H.; Tahk S.-J.; Seung K.B.; Park S.-J.; Gwon H.-C.; Jeong M.H.                  | 2011 |
| Outcome of surgical treatment of peri-implantitis: Results from a 2-year prospective clinical study in humans                                                                                                                                | Serino G.; Turri A.                                                                                                                                                           | 2011 |
| Mandibular bone harvesting for alveolar reconstruction and implant placement: Subjective and objective cross-sectional evaluation of donor and recipient site up to 4 years                                                                  | Cordaro L.; Torsello F.; Tindara Miuccio M.; Mirisola di Torresanto V.; Eliopoulos D.                                                                                         | 2011 |
| Maxillary sinus augmentation with bovine bone and simultaneous dental implant placement in conditions of severe alveolar atrophy: a retrospective analysis of a consecutively treated case series.                                           | Sivolella S.; Bressan E.; Gnocco E.; Berengo M.; Favero G.A.                                                                                                                  | 2011 |
| Retrospective clinical evaluation of an internal tube-in-tube dental implant after 4 years, with special emphasis on peri-implant bone resorption.                                                                                           | Al-Nawas B.; Kämmerer P.W.; Morbach T.; Ophoven F.; Wagner W.                                                                                                                 | 2011 |
| Immediate loading of unsplinted implants in the anterior mandible for overdentures: 3-year results.                                                                                                                                          | Roe P.; Kan J.Y.; Rungcharassaeng K.; Lozada J.L.                                                                                                                             | 2011 |
| To splint or not to splint oral implants in the implant-supported overdenture therapy? A systematic literature review                                                                                                                        | Stoumpis C.; Kohal R.-J.                                                                                                                                                      | 2011 |
| Microbiologic evaluation of compromised periodontal sites before and after immediate intrasocket implant placement.                                                                                                                          | Tripodakis A.P.; Nakou M.                                                                                                                                                     | 2011 |
| The clinical and radiographic outcome of immediately loaded mini implants supporting a mandibular overdenture. A 3-year prospective study                                                                                                    | Elsyad M.A.; Gebreel A.A.; Fouad M.M.; Elshoukoui A.H.                                                                                                                        | 2011 |
| Digital radiographic evaluation of the level of alveolar bone crest in external hexagon implants submitted to 2 types of implant abutments under immediate loading                                                                           | Ponzoni D.; Gadotti R.J.; Sartori I.A.D.M.; Liotto Jr. E.M.                                                                                                                   | 2011 |
| Surgical experience influences 2-stage implant osseointegration                                                                                                                                                                              | Zoghbi S.A.; De Lima L.A.P.A.; Saraiva L.; Romito G.A.                                                                                                                        | 2011 |
| Drug-eluting stents and noncardiac surgery: VA provider perceptions and management practices                                                                                                                                                 | Maddox T.M.; Graham L.A.; Hawn M.T.                                                                                                                                           | 2011 |
| Acute primary total knee arthroplasty for peri-articular knee fractures in patients over 65 years of age                                                                                                                                     | Malviya A.; Reed M.R.; Partington P.F.                                                                                                                                        | 2011 |
| Drug-eluting stents and noncardiac surgery: VA provider perioperative practice based on guideline agreement and experience with stent thrombosis                                                                                             | Maddox T.M.; Graham L.A.; Hawn M.T.                                                                                                                                           | 2011 |

|                                                                                                                                                                                 |                                                                                                                                            |      |
|---------------------------------------------------------------------------------------------------------------------------------------------------------------------------------|--------------------------------------------------------------------------------------------------------------------------------------------|------|
| Comparison of enoxaparin and unfractionated heparin in endovascular interventions for the treatment of peripheral arterial occlusive disease: A randomized controlled trial     | Duschek N.; Vafaie M.; Skrinjar E.; Hirsch K.; Waldhör T.; Hübl W.; Bergmayr W.; Knoebl P.; Assadian A.                                    | 2011 |
| Removing biofilms from microstructured titanium Ex Vivo: A novel approach using atmospheric plasma technology                                                                   | Rupf S.; Idlibi A.N.; Marrawi F.A.; Hannig M.; Schubert A.; von Mueller L.; Spitzer W.; Holtmann H.; Lehmann A.; Rueppell A.; Schindler A. | 2011 |
| Peri-implantitis and late implant failures in postmenopausal women: A cross-sectional study                                                                                     | Dvorak G.; Arnhart C.; Heuberger S.; Huber C.D.; Watzek G.; Gruber R.                                                                      | 2011 |
| The clinical significance of keratinized gingiva around dental implants.                                                                                                        | Greenstein G.; Cavallaro J.                                                                                                                | 2011 |
| Understanding peri-implantitis: a strategic review.                                                                                                                             | Singh P.                                                                                                                                   | 2011 |
| Flapless implant surgery and its effect on periimplant soft tissue                                                                                                              | Höckl K.; Stoll P.; Stoll V.; Bähr W.; Bach G.                                                                                             | 2011 |
| Expression of HMGB1 and HMGN2 in gingival tissues, GCF and PICF of periodontitis patients and peri-implantitis                                                                  | Luo L.; Xie P.; Gong P.; Tang X.-H.; Ding Y.; Deng L.-X.                                                                                   | 2011 |
| Morse taper connection implants supporting "planned" maxillary and mandibular bar-retained overdentures: A 5-year prospective multicenter study                                 | Mangano C.; Mangano F.; Shibli J.A.; Ricci M.; Sammons R.L.; Figliuzzi M.                                                                  | 2011 |
| Clinical and radiographic evaluation of three-implant-retained mandibular overdentures: a 3-year retrospective study.                                                           | Geckili O.; Bilhan H.; Mumcu E.                                                                                                            | 2011 |
| Tilted implants treatment without maxillary sinus grafting in severely resorbed posterior maxilla                                                                               | Wu Y.; Huang W.; Zhang Z.; Wang X.; Wang F.; Wang S.                                                                                       | 2011 |
| Single-tooth titanium implants produced with direct laser metal-forming technology. Results from a 1-year prospective multicenter study                                         | Mangano F.; Mangano C.; Eccellentec T.; De Franco M.; Briguglio F.; Figliuzzi M.; Rapani M.; Luongo G.                                     | 2011 |
| Endoscope guided internal sinus floor elevation and simultaneous dental implant placement                                                                                       | Schleier P.                                                                                                                                | 2011 |
| Effect of platform switching on peri-implant bone levels: A randomized clinical trial                                                                                           | Enkling N.; Jöhren P.; Klimberg V.; Bayer S.; Mericske-Stern R.; Jepsen S.                                                                 | 2011 |
| Marginal bone loss around implants supporting fixed restorations.                                                                                                               | Mumcu E.; Bilhan H.; Cekici A.                                                                                                             | 2011 |
| Bruxism: Overview of current knowledge and suggestions for dental implants planning                                                                                             | Manfredini D.; Bucci M.B.; Sabattini V.B.; Lobbezoo F.                                                                                     | 2011 |
| Effect of the osteotome technique in cases of deficient edentulous ridge                                                                                                        | Rammelsberg P.; Gabbert O.; Schmitter M.; Koob A.; Pritsch M.; Faggion Jr. C.M.                                                            | 2011 |
| Immediate single tooth replacement with subepithelial connective tissue graft using platform switching implants: a case series.                                                 | Chung S.; Rungcharassaeng K.; Kan J.Y.; Roe P.; Lozada J.L.                                                                                | 2011 |
| Outcome of vascular interventions in takayasu arteritis using the takayasu arteritis damage score                                                                               | Rajappa S.M.                                                                                                                               | 2011 |
| Initial clinical experience with vascular reconstruction device (enterprise) for the treatment of intracranial cerebral aneurysms in Japan                                      | Takayama K.; Myouchin K.; Wada T.; Miyasaka T.; Akashi T.; Sakamoto M.; Taoka T.; Nakagawa H.; Kichikawa K.; Kurokawa S.                   | 2011 |
| Analysis of cathepsin-K levels in biologic fluids from healthy or diseased natural teeth and dental implants.                                                                   | Yamalik N.; Günday S.; Kilinc K.; Karabulut E.; Berker E.; Tözüm T.F.                                                                      | 2011 |
| A follow-up study of peri-implantitis cases after treatment                                                                                                                     | Charalampakis G.; Rabe P.; Leonhardt A.; Dahlén G.                                                                                         | 2011 |
| The success of endosseous implants in human immunodeficiency virus-positive patients receiving antiretroviral therapy: A pilot study                                            | Oliveira M.A.; Gallottini M.; Pallos D.; Maluf P.S.Z.; Jablonka F.; Ortega K.L.                                                            | 2011 |
| Outcome of implant therapy involving localised lateral alveolar ridge and/or sinus floor augmentation: a clinical and radiographic retrospective 1-year study.                  | Hansen E.J.; Schou S.; Harder F.; Hjorting-Hansen E.                                                                                       | 2011 |
| A 5-year follow-up of 80 implants in 44 patients placed immediately after the lateral trap-door window procedure to accomplish maxillary sinus elevation without bone grafting. | Lin I.C.; Gonzalez A.M.; Chang H.J.; Kao S.Y.; Chen T.W.                                                                                   | 2011 |
| Influence of a machined collar on crestal bone changes around titanium implants: A histometric study in the canine mandible                                                     | Hermann J.S.; Jones A.A.; Bakaeen L.G.; Buser D.; Schoolfield J.D.; Cochran D.L.                                                           | 2011 |
| Immediate placement and provisionalization of single-tooth implants involving a final individual abutment. A 3-year clinical and radiographic retrospective study               | Hartlev J.; Kohberg P.; Gotfredsen E.; Isidor F.; Schou S.                                                                                 | 2011 |
| [Complications in patients with oral implants. Recommendations for routine preventive inspections].                                                                             | Meijer H.J.; Raghoobar G.M.; Goené R.J.; van der Weijden G.A.                                                                              | 2011 |
| One year survival of 6-mm short dental implants related to implant site                                                                                                         | Neldam C.A.; Gerdts T.; Pinholt E.                                                                                                         | 2011 |
| Significance of dental implants for health care                                                                                                                                 | Schwarz F.; Terheyden H.                                                                                                                   | 2011 |
| The effect of smoking on early bone remodeling on surface modified Southern Implants®                                                                                           | Vandeweghe S.; De Bruyn H.                                                                                                                 | 2011 |
| Implant-prosthetic rehabilitation of anterior partial edentulism: a clinical review.                                                                                            | Krennmair G.; Seemann R.; Weinländer M.; Wegscheider W.; Piehslinger E.                                                                    | 2011 |
| Influence of microgap location and configuration on radiographic bone loss around submerged implants: an experimental study in dogs.                                            | Weng D.; Nagata M.J.; Bosco A.F.; de Melo L.G.                                                                                             | 2011 |
| Clinical decision making: natural tooth salvage or implant?                                                                                                                     | Garg A.; Guez G.                                                                                                                           | 2011 |
| Computer-aided implant surgery in free flaps reconstructed patients, one year follow-up results of a prospective randomized clinical study                                      | Meloni S.M.; De Riu G.; Pisano M.; Massarelli O.; Tullio A.                                                                                | 2011 |
| A paralleling technique modification to determine the bone crest level around dental implants                                                                                   | Fernández-Formoso N.; Rilo B.; Mora M.J.; Martínez-Silva I.; Santana U.                                                                    | 2011 |
| Increased sofat mrna expression during osteoclast development, evidence that sofat is not only associated with T cells                                                          | Dharmapathi A.; Fitzpatrick D.; Cantley M.D.; Haynes D.R.                                                                                  | 2011 |

|                                                                                                                                                                                                        |                                                                                                                                                                                                                                                                                                                                                                                                                                                           |      |
|--------------------------------------------------------------------------------------------------------------------------------------------------------------------------------------------------------|-----------------------------------------------------------------------------------------------------------------------------------------------------------------------------------------------------------------------------------------------------------------------------------------------------------------------------------------------------------------------------------------------------------------------------------------------------------|------|
| Numerical simulation of bone remodelling around dental implants.                                                                                                                                       | Ojeda J.; Martínez-Reina J.; García-Aznar J.M.; Domínguez J.; Doblaré M.                                                                                                                                                                                                                                                                                                                                                                                  | 2011 |
| Influence of microgap location and configuration on radiographic bone loss in nonsubmerged implants: an experimental study in dogs.                                                                    | Weng D.; Nagata M.J.; Leite C.M.; de Melo L.G.; Bosco A.F.                                                                                                                                                                                                                                                                                                                                                                                                | 2011 |
| Diabetes mellitus and dental implants                                                                                                                                                                  | Sahm N.; Schwarz F.; Becker J.                                                                                                                                                                                                                                                                                                                                                                                                                            | 2011 |
| Optical flow analysis of peri-stenting digital subtraction angiography in high grade carotid stenosis: Initial experience                                                                              | Lin C.; Wu T.; Huang T.; Guo W.; Jhu W.; Li S.                                                                                                                                                                                                                                                                                                                                                                                                            | 2011 |
| Color-coded x-rayangiography of intracranial vascular disorders: Peri-therapeutic quantitative analysis and correlation with MR perfusion and intra-operative doppler                                  | Guo W.; Lin C.J.; Hung A.S.Z.; Chang F.C.; Luo C.B.; Lin J.F.; Chu W.F.                                                                                                                                                                                                                                                                                                                                                                                   | 2011 |
| The European Cardiac Resynchronization Therapy Survey: Comparison of outcomes between de novo cardiac resynchronization therapy implantations and upgrades                                             | Bogale N.; Witte K.; Priori S.; Cleland J.; Auricchio A.; Gadler F.; Gitt A.; Limbourg T.; Linde C.; Dickstein K.; Fruhwald F.; Strohmer B.; Goethals M.; Vijgen J.; Trochu J.N.; Gras D.; Kindermann M.; Stellbrink C.; McDonnald K.; Keane D.; Ben Gal T.; Glikson M.; Metra M.; Gasparini M.; Maass A.; Jordaens L.; Alings M.; Larsen A.I.; Færeststrand S.; Delgado J.; Mont L.; Persson H.; Brunner-La Rocca H.P.; Osswald S.; Squire I.; Morgan J. | 2011 |
| A trocar-free procedure for vaginal prolapse repair using mesh and a vaginal support device-an observational registry                                                                                  | Khandwala S.; Slack M.; Hinoul P.; Urquhart C.; Al-Salihi S.                                                                                                                                                                                                                                                                                                                                                                                              | 2011 |
| Multidisciplinary management of congenitally missing teeth with osseointegrated dental implants: a long-term report.                                                                                   | Hu X.L.; Li J.H.; Luo J.; Qiu L.X.; Lin Y.                                                                                                                                                                                                                                                                                                                                                                                                                | 2011 |
| Surgical therapy of peri-implantitis lesions by means of a bovine-derived xenograft: Comparative results of a prospective study on two different implant surfaces                                      | Roccuzzo M.; Bonino F.; Bonino L.; Dalmaso P.                                                                                                                                                                                                                                                                                                                                                                                                             | 2011 |
| Clinical evaluation of an implant maintenance protocol for the prevention of peri-implant diseases in patients treated with immediately loaded full-arch rehabilitations.                              | Corbella S.; Del Fabbro M.; Taschieri S.; De Siena F.; Francetti L.                                                                                                                                                                                                                                                                                                                                                                                       | 2011 |
| Prevalence of periimplant disease in partially edentulous patients: A practice-based cross-sectional study                                                                                             | Rinke S.; Ohl S.; Ziebolz D.; Lange K.; Eickholz P.                                                                                                                                                                                                                                                                                                                                                                                                       | 2011 |
| Immediate single-tooth implants in the anterior maxilla: 3-year results of a case series on hard and soft tissue response and aesthetics                                                               | Cosyn J.; Eghbali A.; De Bruyn H.; Collys K.; Cleymaet R.; De Rouck T.                                                                                                                                                                                                                                                                                                                                                                                    | 2011 |
| Sensitivity of resonance frequency analysis method to assess implant stability.                                                                                                                        | Turkylmaz I.; Company A.M.                                                                                                                                                                                                                                                                                                                                                                                                                                | 2011 |
| Decision tree for the management of periimplant diseases                                                                                                                                               | Okayasu K.; Wang H.-L.                                                                                                                                                                                                                                                                                                                                                                                                                                    | 2011 |
| Stability, marginal bone loss and survival of standard and modified sand-blasted, acid-etched implants in bilateral edentulous spaces: A prospective 15-month evaluation                               | Karabuda Z.C.; Abdel-Haq J.; Arisan V.                                                                                                                                                                                                                                                                                                                                                                                                                    | 2011 |
| Early peri-implant tissue reactions on different titanium surface topographies                                                                                                                         | Yamano S.; Al-Sowigh Z.H.; Gallucci G.O.; Wada K.; Weber H.-P.; Sukotjo C.                                                                                                                                                                                                                                                                                                                                                                                | 2011 |
| Healing of peri-implant tissues after flapless and flapped implant installation                                                                                                                        | Bayounis A.M.A.; Alzoman H.A.; Jansen J.A.; Babay N.                                                                                                                                                                                                                                                                                                                                                                                                      | 2011 |
| Recombinant human bone morphogenetic protein-2 for peri-implant bone regeneration: A case report                                                                                                       | Rotenberg S.A.; Tatakis D.N.                                                                                                                                                                                                                                                                                                                                                                                                                              | 2011 |
| A review of histomorphometric analysis techniques for assessing implant-soft tissue interface                                                                                                          | Chai W.L.; Moharamzadeh K.; Brook I.M.; Van Noort R.                                                                                                                                                                                                                                                                                                                                                                                                      | 2011 |
| Spiral implants bearing full-arch rehabilitation: analysis of clinical outcome.                                                                                                                        | Danza M.; Grecchi F.; Zollino I.; Casadio C.; Carinci F.                                                                                                                                                                                                                                                                                                                                                                                                  | 2011 |
| Diabetes mellitus negatively affects peri-implant bone formation in the diabetic domestic pig                                                                                                          | Von Wilmsowky C.; Stockmann P.; Harsch I.; Amann K.; Metzler P.; Lutz R.; Moest T.; Neukam F.W.; Schlegel K.A.                                                                                                                                                                                                                                                                                                                                            | 2011 |
| A randomised prospective single-blinded study comparing “inside-out” versus “outside-in” transobturator tapes in the management of female stress urinary incontinence (E-TOT study); 3 years follow-up | Abdel-Fattah M.; Familusi A.; Ramsay I.; N'Dow J.                                                                                                                                                                                                                                                                                                                                                                                                         | 2011 |
| A tricuspid valve endocarditis with a large vegetation encroaching on the papillary muscle and right ventricular cavity in patient with a ventricular septal defect                                    | Alafify A.A.; Khuwaitir T.A.; Sharary M.A.; Sajid N.U.                                                                                                                                                                                                                                                                                                                                                                                                    | 2011 |
| Retrograde Peri-implantitis: A case report introducing an approach to its management                                                                                                                   | Chan H.-L.; Wang H.-L.; Bashutski J.D.; Edwards P.C.; Fu J.-H.; Oh T.-J.                                                                                                                                                                                                                                                                                                                                                                                  | 2011 |
| Osmotic pressure of periimplant sulcular and gingival crevicular fluids: A split-mouth, randomized study of its measurement and clinical significance                                                  | Sakallioğlu U.; Lütftioğlu M.; Sakallioğlu E.E.; Sert S.; Ceylan G.                                                                                                                                                                                                                                                                                                                                                                                       | 2011 |
| Intramarrow bone morphogenetic protein 4 gene delivery enhances early implant stability in femurs of ovariectomized rabbits                                                                            | Lai Y.-L.; Kuo N.-C.; Hsiao W.-K.; Yew T.-L.; Lee S.-Y.; Chen H.-L.                                                                                                                                                                                                                                                                                                                                                                                       | 2011 |
| Early loading of sandblasted and acid-etched titanium implants in the edentulous mandible: a prospective 5-year study.                                                                                 | Lethaus B.; Kälber J.; Petrini G.; Brandstätter A.; Weingart D.                                                                                                                                                                                                                                                                                                                                                                                           | 2011 |
| Clinical and histomorphometric observations around dual acid-etched and calcium phosphate nanometer deposited-surface implants.                                                                        | Artzi Z.; Nemcovsky C.E.; Tal H.; Weinberg E.; Weinreb M.; Prasad H.; Rohrer M.D.; Kozlovsky A.                                                                                                                                                                                                                                                                                                                                                           | 2011 |
| Dental restoration of reconstructed mandible after wide resections for oral cancer: Beyond the fibular height deficiency by prosthodontics                                                             | Gessaroli M.; Manfredi M.; Lombardini F.; Bassi M.; Campobassi A.                                                                                                                                                                                                                                                                                                                                                                                         | 2011 |
| Part III: crystalline fluorapatite-coated hydroxyapatite; potential use as a bacteriostatic agent for both pre-implant cases and retreatment of infected implant sites: a report of 4 cases.           | Nordquist W.D.; Krutchkoff D.J.                                                                                                                                                                                                                                                                                                                                                                                                                           | 2011 |
| [Peri-implantitis: tools and techniques for disinfecting the implant surface].                                                                                                                         | Bories C.; Struillou X.; Badran Z.; Soueidan A.                                                                                                                                                                                                                                                                                                                                                                                                           | 2011 |
| The evaluation of bacterial flora in progress of peri-implant disease                                                                                                                                  | Sato J.; Gomi K.; Makino T.; Kawasaki F.; Yashima A.; Ozawa T.; Maeda N.; Arai T.                                                                                                                                                                                                                                                                                                                                                                         | 2011 |

|                                                                                                                                                                                             |                                                                                                                                        |      |
|---------------------------------------------------------------------------------------------------------------------------------------------------------------------------------------------|----------------------------------------------------------------------------------------------------------------------------------------|------|
| Early bacterial colonization and soft tissue health around zirconia and titanium abutments: An in vivo study in man                                                                         | Van Brakel R.; Cune M.S.; Van Winkelhoff A.J.; De Putter C.; Verhoeven J.W.; Van der Reijden W.                                        | 2011 |
| Identification of periodontal pathogens in healthy periimplant sites                                                                                                                        | Casado P.L.; Otazu I.B.; Balduino A.; De Mello W.; Barboza E.P.; Duarte M.E.L.                                                         | 2011 |
| Long-term stability of surgical bone regenerative procedures of peri-implantitis lesions in a prospective case-control study over 3 years                                                   | Roos-Jansäker A.-M.; Lindahl C.; Persson G.R.; Renvert S.                                                                              | 2011 |
| Peri-implant management of patients with aggressive periodontitis.                                                                                                                          | Chee W.                                                                                                                                | 2011 |
| Oral rehabilitation with dental implants after cancer treatment                                                                                                                             | Barrowman R.A.; Wilson P.R.; Wiesenfeld D.                                                                                             | 2011 |
| [Replacement of extracted tooth by means of implant-supported direct abutment. A case report].                                                                                              | Fazekas R.; Fazekas A.                                                                                                                 | 2011 |
| Isotropic micropatterned silica coatings on zirconia induce guided cell growth for dental implants.                                                                                         | Pelaez-Vargas A.; Gallego-Perez D.; Magallanes-Perdomo M.; Fernandes M.H.; Hansford D.J.; De Aza A.H.; Pena P.; Monteiro F.J.          | 2011 |
| The immediate placement of dental implants into extraction sites with periapical lesions: A retrospective chart review                                                                      | Bell C.L.; Diehl D.; Bell B.M.; Bell R.E.                                                                                              | 2011 |
| The evaluation of the success of immediately placed single implants: A retrospective clinical study                                                                                         | Bilhan H.; Mumcu E.; Geçkili O.; Atalay B.                                                                                             | 2011 |
| Care and Aftercare Related to Implant-Retained Dental Crowns in the Maxillary Aesthetic Region: A 5-Year Prospective Randomized Clinical Trial                                              | Visser A.; Raghoobar G.M.; Meijer H.J.; Meijndert L.; Vissink A.                                                                       | 2011 |
| Volumetric analysis of in vivo bone-to-implant contact ratio using intrinsic thresholding                                                                                                   | Lee W.; Kim D.; Yi W.; Cho Y.; Kim H.; Lee S.; Lee S.; Choi S.; Heo M.                                                                 | 2011 |
| Radiographic evaluation of healing tissues of early-failing implants after therapy: a case report.                                                                                          | Sakka S.; Alissa R.                                                                                                                    | 2011 |
| Evaluation of Stress Distribution in Overdenture-Retaining Bar with Different Levels of Vertical Misfit                                                                                     | Spazzin A.O.; Abreu R.T.; Noritomi P.Y.; Consani R.L.X.; Mesquita M.F.                                                                 | 2011 |
| Effects of growth hormone on initial bone formation around dental implants: A dog study                                                                                                     | Calvo-Guirado J.L.; Mate-Sanchez J.; Delgado-Ruiz R.; Ramirez-Fernández M.P.; Cutando-Soriano A.; Peña M.                              | 2011 |
| Aprospectivemulticentre studyofadjustable single-incision mini-sling (Ajust®) in management of stress urinary incontinence in women: 1-Year follow-up study                                 | Abdel-Fattah M.; Agur W.; Abdel-All M.; Guerrero K.; Allam M.; MacKintosh A.; Mostafa A.; Yousef M.                                    | 2011 |
| A multicentre randomised trial comparing single-incision mini-sling (Ajust®) and tension-free vaginal tape-obturator (TVT-O) in management of female stress urinary incontinence            | Mostafa A.; Agur W.; Abdel-All M.; Yousef M.; Allam M.; Guerrero K.; Lim C.; Abdel-Fattah M.                                           | 2011 |
| Towards a new IHE-domain "surgery"                                                                                                                                                          | Burgert O.; Liebmann P.; Treichel T.; Lemke H.U.                                                                                       | 2011 |
| Pancreatic resection in the elderly patient-does age count?                                                                                                                                 | Connell L.; Mulvihill E.; Keeffe M.O.; Suilleabhain C.O.; Reilly S.O.; Power D.                                                        | 2011 |
| Effect of replacement of mandibular defects with a modular endoprosthesis on bone mineral density in a monkey model                                                                         | Wong R.C.W.; Lee S.; Tideman H.; Merckx M.A.W.; Jansen J.; Liao K.                                                                     | 2011 |
| Evaluation of transobturator tapes in management of female stress urinary incontinence with versus without concomitant prolapse repair at 1 year follow-up                                  | Abde-Fattah M.; Ayansina D.; Ramsay I.; Pringle S.; Hardwick C.; Björnsson S.; Mostafa A.; Ali H.                                      | 2011 |
| Implant-supported overdenture in an elderly patient with Huntington's disease.                                                                                                              | Deniz E.; Kokat A.M.; Noyan A.                                                                                                         | 2011 |
| A robotic cadaveric flatfoot analysis of stance phase                                                                                                                                       | Jackson L.T.; Aubin P.M.; Cowley M.S.; Sangeorzan B.J.; Ledoux W.R.                                                                    | 2011 |
| Radiographic bone fill of peri-implantitis defects following nonsurgical therapy: report of three cases.                                                                                    | Nibali L.; Donos N.                                                                                                                    | 2011 |
| Emerging antibacterial biomaterial strategies for the prevention of peri-implant inflammatory diseases.                                                                                     | Bumgardner J.D.; Adatrow P.; Haggard W.O.; Norowski P.A.                                                                               | 2011 |
| The effects of laser microtexturing of the dental implant collar on crestal bone levels and peri-implant health.                                                                            | Botos S.; Yousef H.; Zweig B.; Flinton R.; Weiner S.                                                                                   | 2011 |
| Development of an animal model for Aggregatibacter actinomycetemcomitans biofilm-mediated oral osteolytic infection: A preliminary study                                                    | Freire M.O.; Sedghizadeh P.P.; Schaudinn C.; Gorur A.; Downey J.S.; Choi J.-H.; Chen W.; Kook J.-K.; Chen C.; Goodman S.D.; Zadeh H.H. | 2011 |
| Adherent endotoxins on bone implant surfaces: A reappraisal                                                                                                                                 | Morra M.; Cassinelli C.; Bollati D.; Cascardo G.                                                                                       | 2011 |
| Single implants in the esthetic zone: analysis of recent peri-implant soft tissue alterations and patient satisfaction. A photographic study.                                               | Luo Z.; Zeng R.; Luo Z.; Chen Z.                                                                                                       | 2011 |
| Marginal bone loss in relation to the implant neck surface: An update                                                                                                                       | Aloy-Prósper A.; Maestre-Ferrín L.; Peñarrocha-Oltra D.; Peñarrocha-Diogo M.                                                           | 2011 |
| Comparison of ball and telescopic crown attachments in implant-retained mandibular overdentures: a 5-year prospective study.                                                                | Krennmair G.; Seemann R.; Weinländer M.; Piehslinger E.                                                                                | 2011 |
| Comparison of two early loading protocols in full arch reconstructions in the edentulous maxilla using the Cresco prosthetic system: A three-arm parallel group randomized-controlled trial | Jokstad A.; Ellner S.; Gussgard A.                                                                                                     | 2011 |
| Maintenance of implant-supported maxillary prostheses: a 2-year controlled clinical trial.                                                                                                  | Katsoulis J.; Brunner A.; Mericske-Stern R.                                                                                            | 2011 |
| Implant-supported fixed prostheses in the edentulous maxilla: 8-year prospective results                                                                                                    | Mertens C.; Steveling H.G.                                                                                                             | 2011 |
| Equicrestal and subcrestal dental implants: A histologic and histomorphometric evaluation of nine retrieved human implants                                                                  | Degidi M.; Perrotti V.; Shibli J.A.; Novaes A.B.; Piattelli A.; Iezzi G.                                                               | 2011 |
| Peri-implant bone tissue assessment by comparing the outcome of intra-oral radiograph and cone beam computed tomography analyses to the histological standard                               | Dos Santos Corpas L.; Jacobs R.; Quirynen M.; Huang Y.; Naert I.; Duyck J.                                                             | 2011 |

|                                                                                                                                                                                                                                                               |                                                                                                                  |      |
|---------------------------------------------------------------------------------------------------------------------------------------------------------------------------------------------------------------------------------------------------------------|------------------------------------------------------------------------------------------------------------------|------|
| Treatment concept of the edentulous mandible with prefabricated telescopic abutments and immediate functional loading.                                                                                                                                        | Romanos G.E.; May S.; May D.                                                                                     | 2011 |
| Intermittent parathyroid hormone fails to stimulate osseointegration in diabetic rats                                                                                                                                                                         | Kuchler U.; Spilka T.; Baron K.; Tangl S.; Watzek G.; Gruber R.                                                  | 2011 |
| The influence of individual bone patterns on peri-implant bone loss: preliminary report from a 3-year randomized clinical and histologic trial in patients treated with implants restored with matching-diameter abutments or the platform-switching concept. | Canullo L.; Iannello G.; Götz W.                                                                                 | 2011 |
| Radiographic evaluation of marginal bone level around internal-hex implants with switched platform: a clinical case report series.                                                                                                                            | de Almeida F.D.; Carvalho A.C.; Fontes M.; Pedrosa A.; Costa R.; Noletto J.W.; Mourão C.F.                       | 2011 |
| Five-year treatment outcomes with four types of implants in the posterior maxilla and mandible in partially edentulous patients: a retrospective study.                                                                                                       | Ozkan Y.; Akoğlu B.; Kulak-Ozkan Y.                                                                              | 2011 |
| Serial troponin-I measurement after elective percutaneous coronary intervention: Is it worth?                                                                                                                                                                 | Sousa A.; Lebreiro A.; Sousa C.; Rangel I.; Lopes R.; Amorim S.; Martins E.; Campelo M.; Silva J.C.; Maciel M.J. | 2011 |
| Practice pattern of retrievable inferior vena CAVA filters in a tertiary care institution                                                                                                                                                                     | Chakraborti D.; Bandyopadhyay T.                                                                                 | 2011 |
| Immediate loading of dental implants in the edentulous maxilla.                                                                                                                                                                                               | Eccellente T.; Piombino M.; Piattelli A.; D'Alimonte E.; Perrotti V.; Iezzi G.                                   | 2011 |
| Teeth and implant surroundings: clinical health indices and microbiologic parameters.                                                                                                                                                                         | Vered Y.; Zini A.; Mann J.; Kolog H.; Steinberg D.; Zambon J.J.; Haraszthy V.I.; DeVizio W.; Sreenivasan P.      | 2011 |
| Assessment of pain associated with insertion torque of dental implants. A prospective, randomized-controlled study                                                                                                                                            | Scarano A.; Piattelli A.; Assenza B.; Sollazzo V.; Lucchese A.; Carinci F.                                       | 2011 |
| Influence of various implant platform configurations on peri-implant tissue dimensions: An experimental study in dog                                                                                                                                          | Baffone G.M.; Botticelli D.; Pantani F.; Cardoso L.C.; Schweikert M.T.; Lang N.P.                                | 2011 |
| Open or submerged healing of implants with platform switching: A randomized, controlled clinical trial                                                                                                                                                        | Enkling N.; Jöhren P.; Klimberg T.; Mericske-Stern R.; Jervøe-Storm P.-M.; Bayer S.; Gölzen N.; Jepsen S.        | 2011 |
| Extraoral prostheses using extraoral implants                                                                                                                                                                                                                 | Pekkan G.; Tuna S.H.; Oghan F.                                                                                   | 2011 |
| Optimization of wound healing through coating of meshes for hernia reparation with the anti-ageing hormone DHEA                                                                                                                                               | Röth A.A.; Fiebler A.; Leher H.; Neumann U.P.; Klinge U.                                                         | 2011 |
| Transcatheter aortic valve implant - Addressing the unique needs of this elderly population                                                                                                                                                                   | Teehan S.                                                                                                        | 2011 |
| Peri-implantitis: A risk factor in implant failure                                                                                                                                                                                                            | Gupta H.K.; Garg A.; Bedi N.K.                                                                                   | 2011 |
| The association between selected risk indicators and severity of peri-implantitis using mixed model analyses                                                                                                                                                  | Koldslund O.C.; Scheie A.A.; Aass A.M.                                                                           | 2011 |
| Prevalence of human cytomegalovirus and Epstein-Barr virus in subgingival plaque at peri-implantitis, mucositis and healthy sites. A pilot study                                                                                                              | Jankovic S.; Aleksic Z.; Dimitrijevic B.; Lekovic V.; Camargo P.; Kenney B.                                      | 2011 |
| Er:YAG laser in the clinical management of severe peri-implantitis: a case report.                                                                                                                                                                            | Badran Z.; Bories C.; Struillou X.; Saffarzadeh A.; Verner C.; Soueidan A.                                       | 2011 |
| Long-term results of mandibular implants supporting an overdenture: implant survival, failures, and crestal bone level changes.                                                                                                                               | Ueda T.; Kremer U.; Katsoulis J.; Mericske-Stern R.                                                              | 2011 |
| Platelet-derived growth factor applications in periodontal and peri-implant bone regeneration                                                                                                                                                                 | Kaigler D.; Avila G.; Wisner-Lynch L.; Nevins M.L.; Nevins M.; Rasperini G.; Lynch S.E.; Giannobile W.V.         | 2011 |
| Dimensional changes of peri-implant soft tissue over 2 years with single-implant crowns in the anterior maxilla                                                                                                                                               | Gallucci G.O.; Grütter L.; Chuang S.-K.; Belser U.C.                                                             | 2011 |
| Marginal Bone Level Changes at Dental Implants after 5 Years in Function: A Meta-Analysis                                                                                                                                                                     | Laurell L.; Lundgren D.                                                                                          | 2011 |
| Peri-implant tissue response following connective tissue and bone grafting in conjunction with immediate single-tooth replacement in the esthetic zone: a case series.                                                                                        | Tsuda H.; Rungcharassaeng K.; Kan J.Y.; Roe P.; Lozada J.L.; Zimmerman G.                                        | 2011 |
| Stability of contour augmentation and esthetic outcomes of implant-supported single crowns in the esthetic zone: 3-year results of a prospective study with early implant placement postextraction.                                                           | Buser D.; Wittneben J.; Bornstein M.M.; Grütter L.; Chappuis V.; Belser U.C.                                     | 2011 |
| Short implants in posterior jaws. A prospective 1-year study.                                                                                                                                                                                                 | Maló P.; Nobre M.; Lopes A.                                                                                      | 2011 |
| Rehabilitation of posterior atrophic edentulous jaws: prostheses supported by 5 mm short implants or by longer implants in augmented bone? One-year results from a pilot randomised clinical trial.                                                           | Esposito M.; Pellegrino G.; Pistilli R.; Felice P.                                                               | 2011 |
| Influence of implant geometry on primary insertion stability and simulated peri-implant bone loss: an in vitro study using resonance frequency analysis and damping capacity assessment.                                                                      | Lachmann S.; Laval J.Y.; Axmann D.; Weber H.                                                                     | 2011 |
| Clinical and radiological outcomes of 1- versus 2-stage implant placement: 1-year results of a randomised clinical trial.                                                                                                                                     | Tallarico M.; Vaccarella A.; Marzi G.C.                                                                          | 2011 |
| Three-dimensional finite element analysis of fixed complete-arch prostheses supported by 4 immediate-loaded implants in the completely edentulous maxilla using clinical computerized tomography data.                                                        | Kimura K.; Fukase Y.; Makino M.; Masaki C.; Nakamoto T.; Hosokawa R.                                             | 2011 |
| Do mucositis lesions around implants differ from gingivitis lesions around teeth?                                                                                                                                                                             | Lang N.P.; Bosshardt D.D.; Lulic M.                                                                              | 2011 |
| Bone regeneration using particulate grafts: An update                                                                                                                                                                                                         | Aloy-Prósper A.; Maestre-Ferrin L.; Peñarrocha-Oltra D.; Peñarrocha-Diogo M.                                     | 2011 |
| Computer planning and bone density evaluation of jaws reconstructed with bone grafts from living donors                                                                                                                                                       | Grecchi F.; Zollino I.; Gallo F.; Rubino G.; Motroni A.; Carinci F.                                              | 2011 |
| Peri-operative management of ophthalmic patients taking antithrombotic therapy                                                                                                                                                                                | Lip G.Y.H.; Durrani O.M.; Roldan V.; Lip P.L.; Marin F.; Reuser T.Q.                                             | 2011 |

|                                                                                                                                                                                                    |                                                                                                                               |      |
|----------------------------------------------------------------------------------------------------------------------------------------------------------------------------------------------------|-------------------------------------------------------------------------------------------------------------------------------|------|
| Influence of the peri-implantitis to the microscrew-bone interface                                                                                                                                 | Hu Y.; Zheng L.; Tang T.; Zhao Z.; Song J.; Deng F.                                                                           | 2011 |
| Dental implant treatment for two adjacent missing teeth in the maxillary aesthetic zone: A comparative pilot study and test of principle                                                           | Tymstra N.; Raghoobar G.M.; Vissink A.; Meijer H.J.A.                                                                         | 2011 |
| Retrospective evaluation of crestal bone changes around implants with reduced abutment diameter placed non-submerged and at subcrestal positions: The effect of bone grafting at implant placement | Koutouzis T.; Fetner M.; Fetner A.; Lundgren T.                                                                               | 2011 |
| Assessment of quality of life after implant-retained prosthetically reconstructed maxillae and mandibles postcancer treatments                                                                     | Dholam K.P.; Bachher G.K.; Yadav P.S.; Quazi G.A.; Pusalkar H.A.                                                              | 2011 |
| Eleven dental implants placed in a liver transplantation patient: A case report and 5-year clinical evaluation                                                                                     | Gu L.; Wang Q.; Yu Y.-C.                                                                                                      | 2011 |
| Histological evaluation of the effect of using growth hormone around immediate dental implants in fresh extraction sockets: An experimental study                                                  | Hossam Eldein A.M.; Elghamrawy S.H.; Osman S.M.; Elhak A.R.                                                                   | 2011 |
| A prospective, controlled clinical trial evaluating the clinical and radiological outcome after 3 years of immediately placed implants in sockets exhibiting periapical pathology                  | Truninger T.C.; Philipp A.O.H.; Siegenthaler D.W.; Roos M.; Hämmerle C.H.F.; Jung R.E.                                        | 2011 |
| Implant surface characteristics influence the outcome of treatment of peri-implantitis: An experimental study in dogs                                                                              | Albouy J.-P.; Abrahamsson I.; Persson L.G.; Berglundh T.                                                                      | 2011 |
| Peri-implant soft tissue management through use of cultured gingival graft: A case report                                                                                                          | Mohammadi M.; Mofid R.; Shokrgozar M.A.                                                                                       | 2011 |
| A 6-month study of the effects of 0.3% triclosan/copolymer dentifrice on dental implants                                                                                                           | Sreenivasan P.K.; Vered Y.; Zini A.; Mann J.; Kolog H.; Steinberg D.; Zambon J.J.; Haraszthy V.I.; Da Silva M.P.; De Vizio W. | 2011 |
| Prevalence of bleeding on probing: a cohort study in a specialist periodontal clinic.                                                                                                              | Farina R.; Scapoli C.; Carrieri A.; Guarnelli M.E.; Trombelli L.                                                              | 2011 |
| A novel surgical procedure for coronally repositioning of the buccal implant mucosa using acellular dermal matrix: A case report                                                                   | Mareque-Bueno S.                                                                                                              | 2011 |
| A 1-year prospective clinical study of soft tissue conditions and marginal bone changes around dental implants after flapless implant surgery                                                      | Jeong S.-M.; Choi B.-H.; Kim J.; Xuan F.; Lee D.-H.; Mo D.-Y.; Lee C.-U.                                                      | 2011 |
| The effect of different implant neck configurations on soft and hard tissue healing: A randomized-controlled clinical trial                                                                        | Tan W.C.; Lang N.P.; Schmidlin K.; Zwahlen M.; Pjetursson B.E.                                                                | 2011 |
| A 10-year retrospective analysis of marginal bone-level changes around implants in periodontally healthy and periodontally compromised tobacco smokers                                             | Aglietta M.; Siciliano V.I.; Rasperini G.; Cafiero C.; Lang N.P.; Salvi G.E.                                                  | 2011 |
| Facial gingival tissue stability following immediate placement and provisionalization of maxillary anterior single implants: a 2- to 8-year follow-up.                                             | Kan J.Y.; Rungcharassaeng K.; Lozada J.L.; Zimmerman G.                                                                       | 2011 |
| Five-year treatment outcomes with three brands of implants supporting mandibular overdentures.                                                                                                     | Akdoglu B.; Ucakale M.; Ozkan Y.; Kulak-Ozkan Y.                                                                              | 2011 |
| Three-dimensional modeling and finite element analysis in treatment planning for orthodontic tooth movement                                                                                        | Ammar H.H.; Ngan P.; Crout R.J.; Mucino V.H.; Mukdadi O.M.                                                                    | 2011 |
| Volume gain and stability of peri-implant tissue following bone and soft tissue augmentation: 1-year results from a prospective cohort study                                                       | Schneider D.; Grunder U.; Ender A.; Hämmerle C.H.F.; Jung R.E.                                                                | 2011 |
| Influence of implant-abutment interface design on bone and soft tissue levels around immediately placed and restored single-tooth implants: a randomized controlled clinical trial.                | Pieri F.; Aldini N.N.; Marchetti C.; Corinaldesi G.                                                                           | 2011 |
| Esthetic outcomes with porcelain-fused-to-ceramic and all-ceramic single-implant crowns: A randomized clinical trial                                                                               | Gallucci G.O.; Grütter L.; Nedir R.; Bischof M.; Belser U.C.                                                                  | 2011 |
| Complication and failure rates of fixed dental prostheses in patients treated for periodontal disease                                                                                              | Brägger U.; Hirt-Steiner S.; Schnell N.; Schmidlin K.; Salvi G.E.; Pjetursson B.; Matulienė G.; Zwahlen M.; Lang N.P.         | 2011 |
| Implant-prosthetic rehabilitation of the edentulous maxilla and mandible with immediately loaded implants: preliminary data from a retrospective study, considering time of implantation.          | Strietzel F.P.; Karmon B.; Lorean A.; Fischer P.P.                                                                            | 2011 |
| Soft tissues around long-term platform switching implant restorations: A histological human evaluation. Preliminary results                                                                        | Canullo L.; Pellegrini G.; Allievi C.; Trombelli L.; Annibaldi S.; Dellavia C.                                                | 2011 |
| Long-term outcome of dental implants placed in revascularized fibula free flaps used for the reconstruction of maxillo-mandibular defects due to extreme atrophy                                   | Chiapasco M.; Romeo E.; Coggiola A.; Brusati R.                                                                               | 2011 |
| Deproteinized bovine bone in periodontal and implant surgery.                                                                                                                                      | Baldini N.; De Sanctis M.; Ferrari M.                                                                                         | 2011 |
| Prognosis in implant dentistry: a system for classifying the degree of peri-implant mucosal inflammation.                                                                                          | Nogueira-Filho G.; Iacopino A.M.; Tenenbaum H.C.                                                                              | 2011 |
| In vivo performance of titanium implants functionalized with eicosapentaenoic acid and UV irradiation                                                                                              | Petzold C.; Rubert M.; Lyngstadaas S.P.; Ellingsen J.E.; Monjo M.                                                             | 2011 |
| Micro CT and human histological analysis of a peri-implant osseous defect grafted with porous titanium granules: a case report.                                                                    | Wohlfahrt J.C.; Aass A.M.; Ronold H.J.; Lyngstadaas S.P.                                                                      | 2011 |
| Sinus lift with guided bone regeneration or anorganic bovine bone: 1-year post-loading results of a pilot randomised clinical trial.                                                               | Esposito M.; Piattelli M.; Pistilli R.; Pellegrino G.; Felice P.                                                              | 2010 |
| Influence of metals on cytokines production in connection with successful implantation therapy in dentistry                                                                                        | Podzimek S.; Tomka M.; Nemeth T.; Himmlova L.; Matucha P.; Prochazkova J.                                                     | 2010 |
| Clinical effect of implant healing between submerged and non-submerged dental implants: a randomized controlled study                                                                              | Zhao P.; Shi J.                                                                                                               | 2010 |
| Vertical augmentation with interpositional blocks of anorganic bovine bone vs. 7-mm-long implants in posterior mandibles: 1-year results of a randomized clinical trial                            | Felice P.; Pellegrino G.; Checchi L.; Pistilli R.; Esposito M.                                                                | 2010 |
| Crestal bone resorption around platform-switched dental implants with fine threaded neck after immediate and delayed loading.                                                                      | Heinemann F.; Hasan I.; Schwahn C.; Biffar R.; Mundt T.                                                                       | 2010 |

|                                                                                                                                                                                                            |                                                                                                                                               |      |
|------------------------------------------------------------------------------------------------------------------------------------------------------------------------------------------------------------|-----------------------------------------------------------------------------------------------------------------------------------------------|------|
| Immediate positioning of a definitive abutment versus repeated abutment replacements in post-extractive implants: 3-year follow-up of a randomised multicentre clinical trial.                             | Canullo L.; Bignozzi I.; Cocchetto R.; Cristalli M.P.; Iannello G.                                                                            | 2010 |
| A split-mouth comparative study up to 16 years of two screw-shaped titanium implant systems                                                                                                                | Jacobs R.; Pittayapat P.; Van Steenberghe D.; De Mars G.; Gijbels F.; Van Der Donck A.; Li L.; Liang X.; Van Assche N.; Quirynen M.; Naert I. | 2010 |
| Comparison of crestal bone loss and implant stability among the implants placed with conventional procedure and using osteotome technique: a clinical study.                                               | Padmanabhan T.V.; Gupta R.K.                                                                                                                  | 2010 |
| Removal of an oral squamous cell carcinoma including parts of osseointegrated implants in the marginal mandibulectomy. A case report                                                                       | Meijer G.J.; Dieleman F.J.; Bergé S.J.; Merckx M.A.W.                                                                                         | 2010 |
| Evaluation of peri-implant marginal bone loss using modified abutment connections at various crestal level placements.                                                                                     | Veis A.; Parissis N.; Tsirlis A.; Papadeli C.; Marinis G.; Zogakis A.                                                                         | 2010 |
| Implant primary stability determined by resonance frequency analysis in surgically created defects: A pilot cadaver study                                                                                  | Chan H.-L.; El-Kholy K.; Fu J.-H.; Galindo-Moreno P.; Wang H.-L.                                                                              | 2010 |
| Zirconia removable telescopic dentures retained on teeth or implants for maxilla rehabilitation. Three-year observation of three cases.                                                                    | Zafiropoulos G.G.; Rebbe J.; Thielen U.; Deli G.; Beaumont C.; Hoffmann O.                                                                    | 2010 |
| Ridge augmentation of the atrophic posterior mandible with inlay and onlay iliac bone grafting : A prospective controlled clinical trial for the comparison of two techniques                              | Lizio G.; Felice P.; Pellegrino G.; Pistilli R.; Marchetti C.                                                                                 | 2010 |
| Replacement of vertically root-fractured endodontically treated teeth with immediate implants in conjunction with a synthetic bone cement                                                                  | Taschieri S.; Rosano G.; Weinstein T.; Del Fabbro M.                                                                                          | 2010 |
| Early complications associated with total hip arthroplasty due to femoral neck fracture                                                                                                                    | Gallo J.; Čechová I.; Zapletalová J.                                                                                                          | 2010 |
| Clinical follow-up of unilateral, fixed dental prosthesis on maxillary implants.                                                                                                                           | Wahlström M.; Sagulin G.B.; Jansson L.E.                                                                                                      | 2010 |
| A 4-year evaluation of the peri-implant parameters of immediately loaded implants placed in fresh extraction sockets                                                                                       | Crespi R.; Cappare P.; Gherlone E.                                                                                                            | 2010 |
| Peri-implant disease: the basics.                                                                                                                                                                          | Garg A.                                                                                                                                       | 2010 |
| Osteotome sinus floor elevation technique without grafting: A 5-year prospective study                                                                                                                     | Nedir R.; Nurdin N.; Vazquez L.; Szmukler-Moncler S.; Bischof M.; Bernard J.-P.                                                               | 2010 |
| Clinical evaluation of marginal bone level change of multiple adjacent implants restored with splinted and nonsplinted restorations: a 5-year prospective study.                                           | Vigolo P.; Zaccaria M.                                                                                                                        | 2010 |
| Clinical and microbiological effects of mechanical instrumentation and local antimicrobials during periodontal supportive therapy in aggressive periodontitis patients: Smoker versus non-smoker patients  | Guarnelli M.E.; Farina R.; Cucchi A.; Trombelli L.                                                                                            | 2010 |
| The clinical and radiographic outcome of implants placed in the posterior maxilla with a guided flapless approach and immediately restored with a provisional rehabilitation: a randomized clinical trial. | Van de Velde T.; Sennerby L.; De Bruyn H.                                                                                                     | 2010 |
| Implant treatment in grafted and native bone in patients affected by ectodermal dysplasia                                                                                                                  | Grecchi F.; Pagliani L.; Mancini G.E.; Zollino I.; Carinci F.                                                                                 | 2010 |
| Combined effects of implant insertion depth and alveolar bone quality on periimplant bone strain induced by a wide-diameter, short implant and a narrow-diameter, long implant                             | Chou H.-Y.; Müftü S.; Bozkaya D.                                                                                                              | 2010 |
| Discomfort experienced after immediate implant placement associated with three different regenerative techniques.                                                                                          | Urban T.; Wenzel A.                                                                                                                           | 2010 |
| Evidence-based treatment for a smoker with periimplantitis                                                                                                                                                 | Wang P.; Xie H.-X.; Qu Y.-L.; Man Y.                                                                                                          | 2010 |
| Flapless surgery and immediately loaded implants: a retrospective comparison between implantation with and without computer-assisted planned surgical stent.                                               | Danza M.; Carinci F.                                                                                                                          | 2010 |
| Effects of occlusal overload on peri-implant tissue health: A systematic review of animal-model studies                                                                                                    | Chambrone L.; Chambrone L.A.; Lima L.A.                                                                                                       | 2010 |
| [Consensus on peri-implant infections].                                                                                                                                                                    | van Winkelhoff A.J.                                                                                                                           | 2010 |
| Dental implants in patients with rheumatoid arthritis: Clinical outcome and peri-implant findings                                                                                                          | Krennmair G.; Seemann R.; Piehlsinger E.                                                                                                      | 2010 |
| Peri-implant diseases.                                                                                                                                                                                     | Heasman P.                                                                                                                                    | 2010 |
| Short-term clinical retrospective study of implants in geriatric patients older than 70 years                                                                                                              | Lee H.-J.; Kim Y.-K.; Park J.-Y.; Kim S.-G.; Kim M.-J.; Yun P.-Y.                                                                             | 2010 |
| Platform switching for marginal bone preservation around dental implants: A systematic review and meta-analysis                                                                                            | Atieh M.A.; Ibrahim H.M.; Atieh A.H.                                                                                                          | 2010 |
| Immediate loading of two implants supporting a magnet attachment-retained overdenture: One-year clinical study                                                                                             | Pae A.; Kim J.-W.; Kwon K.-R.                                                                                                                 | 2010 |
| Astra Tech, Brånemark, and ITI implants in the rehabilitation of partial edentulism: Two-year results                                                                                                      | Bilhan H.; Kutay O.; Arat S.; Çekici A.; Cehreli M.C.                                                                                         | 2010 |
| Implant rehabilitation in grafted and native bone in patients affected by ectodermal dysplasia: Evaluation of 78 implants inserted in 8 patients                                                           | Grecchi F.; Zingari F.; Bianco R.; Zollino I.; Casadio C.; Carinci F.                                                                         | 2010 |
| Three-dimensional bone and soft tissue requirements for optimizing esthetic results in compromised cases with multiple implants.                                                                           | Ishikawa T.; Salama M.; Funato A.; Kitajima H.; Moroi H.; Salama H.; Garber D.                                                                | 2010 |
| Complex rehabilitation with homologous bone grafts and latest-generation zirconia implants                                                                                                                 | Borgonovo A.E.; Boninsegna R.; Dolci M.; Ghirlanda G.; Censi R.                                                                               | 2010 |
| Bone resorption and complications in alveolar distraction osteogenesis                                                                                                                                     | Ettl T.; Gerlach T.; Schlüsselbauer T.; Gosau M.; Reichert T.E.; Driemel O.                                                                   | 2010 |

|                                                                                                                                                                                                                |                                                                                                                                             |      |
|----------------------------------------------------------------------------------------------------------------------------------------------------------------------------------------------------------------|---------------------------------------------------------------------------------------------------------------------------------------------|------|
| A technique for managing and accurate registration of periimplant soft tissues                                                                                                                                 | Ntounis A.; Petropoulou A.                                                                                                                  | 2010 |
| [Implants have big disadvantages. Yes].                                                                                                                                                                        | van Winkelhoff A.J.                                                                                                                         | 2010 |
| A single dose of zoledronic acid reverses the deleterious effects of glucocorticoids on titanium implant osseointegration                                                                                      | Carvas J.S.B.; Pereira R.M.R.; Caparbo V.F.; Fuller P.; Silveira C.A.; Lima L.A.P.; Bonfa E.; Mello S.B.V.                                  | 2010 |
| Incidence, severity and predictors of congestive heart failure following primary PCI: The HORIZONS-AMI trial                                                                                                   | Kelly D.J.; Gershlick T.; Witzembichler B.; Guagliumi G.; Mehran R.; Stone G.W.                                                             | 2010 |
| Evaluation of everolimus-eluting and paclitaxel-eluting stents in patients with jailed side branches: The SPIRIT IV trial                                                                                      | Lansky A.J.; Yaqub M.; Sood P.; Applegate R.J.; Wang J.C.; Rizvi A.; Skelding K.; Smith R.S.; Cao S.; Hermiller J.B.; Sudhir K.; Stone G.W. | 2010 |
| A 5-year report from a multicentre randomised clinical trial: immediate non-occlusal versus early loading of dental implants in partially edentulous patients.                                                 | Capelli M.; Esposito M.; Zuffetti F.; Galli F.; Del Fabbro M.; Testro T.                                                                    | 2010 |
| A 12-year retrospective analytic study of the implant survival rate in 177 consecutive maxillary sinus augmentation procedures.                                                                                | Cho-Lee G.Y.; Naval-Gias L.; Castrejon-Castrejon S.; Capote-Moreno A.L.; Gonzalez-Garcia R.; Sastre-Perez J.; Munoz-Guerra M.F.             | 2010 |
| Implant placement in patients with oral bisphosphonate therapy: A case series                                                                                                                                  | Shabestari G.O.; Shayesteh Y.S.; Khojasteh A.; Alikhasi M.; Moslemi N.; Aminian A.; Masaeli R.; Eslami B.; Treister N.S.                    | 2010 |
| Using the best available evidence to support clinical decisions in implant dentistry.                                                                                                                          | Faggion Jr. C.M.; Schmitter M.                                                                                                              | 2010 |
| A 10-year retrospective analysis of radiographic bone-level changes of implants supporting single-unit crowns in periodontally compromised vs. periodontally healthy patients                                  | Matarasso S.; Rasperini G.; Iorio Siciliano V.; Salvi G.E.; Lang N.P.; Aglietta M.                                                          | 2010 |
| Risk of implant failure and marginal bone loss in subjects with a history of periodontitis: A systematic review and meta-analysis                                                                              | Safii S.H.; Palmer R.M.; Wilson R.F.                                                                                                        | 2010 |
| Timing of implant placement after tooth extraction: immediate, immediate-delayed or delayed implants? A Cochrane systematic review.                                                                            | Esposito M.; Grusovin M.G.; Polyzos I.P.; Felice P.; Worthington H.V.                                                                       | 2010 |
| Immediate loading of unsplinted implants in the anterior mandible for overdentures: a case series.                                                                                                             | Roe P.; Kan J.Y.; Rungcharassaeng K.; Lozada J.L.; Kleinman A.S.; Goodacre C.J.; Chen J.W.                                                  | 2010 |
| Mechanical anchorage and peri-implant bone formation of surface-modified zirconia in minipigs                                                                                                                  | Schliephake H.; Hefti T.; Schlottig F.; G  det P.; Staedt H.                                                                                | 2010 |
| Benefits of dental implants installed during ablative tumour surgery in oral cancer patients: A prospective 5-year clinical trial                                                                              | Korfage A.; Schoen P.J.; Raghoobar G.M.; Roodenburg J.L.N.; Vissink A.; Reintsema H.                                                        | 2010 |
| A no-contact vibration device for measuring implant stability                                                                                                                                                  | Hayashi M.; Kobayashi C.; Ogata H.; Yamaoka M.; Ogiso B.                                                                                    | 2010 |
| Iliac crest bone grafting with sinus lift for restoration of severe posterior atrophy                                                                                                                          | Castagnola M.; Sacco R.; De Micheli L.                                                                                                      | 2010 |
| Implant treatment software planning and guided flapless surgery with immediate provisional prosthesis delivery in the fully edentulous maxilla. A retrospective analysis of 15 consecutively treated patients. | Meloni S.M.; De Riu G.; Pisano M.; Cattina G.; Tullio A.                                                                                    | 2010 |
| Complications in 775 XLIF surgeries                                                                                                                                                                            | Rodgers W.B.; Gerber E.J.                                                                                                                   | 2010 |
| Update on antiplatelets                                                                                                                                                                                        | Tepe G.                                                                                                                                     | 2010 |
| Current guidelines for carotid stenosis management                                                                                                                                                             | Van Den Berg J.C.                                                                                                                           | 2010 |
| Transcatheter aortic valve replacement: State of the art and perspectives                                                                                                                                      | Cribier A.                                                                                                                                  | 2010 |
| A prospective multicenter study evaluating Elevate™ apical and posterior (AandP) for treatment of posterior and/or apical vaginal wall prolapse: One-Year follow-up                                            | Lukban J.; VanDrie D.; Beyer R.; Erickson T.; Moore R.; Nguyen J.; Patel M.                                                                 | 2010 |
| A review of clinical trials and registries in descending thoracic aortic aneurysms                                                                                                                             | Knepper J.; Upchurch G.R.                                                                                                                   | 2010 |
| Transfusion practice in orthopedic surgery                                                                                                                                                                     | Waters J.H.; Wisniewski M.; Dyga R.M.; Yazer M.                                                                                             | 2010 |
| Management of failed laparoscopic pyeloplasty                                                                                                                                                                  | Tan H.; Wolf J.S.                                                                                                                           | 2010 |
| Safety of ureteroscopy with biopsy or holmium laser lithotripsy in coagulopathic patients                                                                                                                      | Elkoushy M.A.; Violette P.; Andonian S.                                                                                                     | 2010 |
| Interventions for replacing missing teeth: maintaining and recovering soft tissue health around dental implants.                                                                                               | Grusovin M.G.; Coulthard P.; Worthington H.V.; George P.; Esposito M.                                                                       | 2010 |
| Peri-implantitis in a specialist clinic of periodontology clinical features and risk indicators                                                                                                                | Carcuac O.; Jansson L.                                                                                                                      | 2010 |
| Restoration of peri-implant defects in immediate implant installations by Choukroun platelet-rich fibrin and silk fibroin powder combination graft                                                             | Jang E.-S.; Park J.-W.; Kweon H.; Lee K.-G.; Kang S.-W.; Baek D.-H.; Choi J.-Y.; Kim S.-G.                                                  | 2010 |
| Low pulse energy Nd:YAG laser irradiation exerts a biostimulative effect on different cells of the oral microenvironment: "An in vitro study"                                                                  | Chellini F.; Sassoli C.; Nosi D.; Deledda C.; Tonelli P.; Zecchi-Orlandini S.; Formigli L.; Giannelli M.                                    | 2010 |
| Soft tissue considerations in implant site development                                                                                                                                                         | Geurs N.C.; Vassilopoulos P.J.; Reddy M.S.                                                                                                  | 2010 |
| Transmucosal healing around peri-implant defects: Crestal and subcrestal implant placement in dogs                                                                                                             | Tran B.L.T.; Chen S.T.; Caiafa A.; Davies H.M.S.; Darby I.B.                                                                                | 2010 |
| Relevant anatomic and biomechanical studies for implant possibilities on the atrophic maxilla: Critical appraisal and literature review                                                                        | Rossetti P.H.O.; Bonachela W.C.; Rossetti L.M.N.                                                                                            | 2010 |
| Porcine bone used in sinus augmentation procedures: A 5-year retrospective clinical evaluation                                                                                                                 | Scarano A.; Piattelli A.; Assenza B.; Quaranta A.; Perrotti V.; Piattelli M.; Iezzi G.                                                      | 2010 |
| Prefabricated zirconium dioxide implant abutments for single-tooth replacement in the posterior region: Evaluation of peri-implant tissues and superstructures after 12 months of function                     | Nothdurft F.; Pospiech P.                                                                                                                   | 2010 |



|                                                                                                                                                                                                      |                                                                                                               |      |
|------------------------------------------------------------------------------------------------------------------------------------------------------------------------------------------------------|---------------------------------------------------------------------------------------------------------------|------|
| Considerations of implant abutment and crown contour: critical contour and subcritical contour.                                                                                                      | Su H.; Gonzalez-Martin O.; Weisgold A.; Lee E.                                                                | 2010 |
| Influence of material of overdenture-retaining bar with vertical misfit on three-dimensional stress distribution                                                                                     | Abreu R.T.; Spazzin A.O.; Noritomi P.Y.; Consani R.L.X.; Mesquita M.F.                                        | 2010 |
| A prospective multicenter study evaluating Elevate™ apical and posterior for treatment of posterior and/or apical vaginal wall prolapse: Twelve-month follow-up                                      | Lukban J.; Roovers J.; Moore R.D.; Patel M.; Courtieu C.; Mayne C.; Flaherty J.; Liedl B.; Lange R.; Beyer R. | 2010 |
| A prospective multicenter study evaluating elevate™ apical and posterior for treatment of posterior and/or apical vaginal wall prolapse: Twelve-month follow-up                                      | Lukban J.; Roovers J.; Moore R.D.; Patel M.; Courtieu C.; Mayne C.; Flaherty J.; Liedl B.; Lange R.; Beyer R. | 2010 |
| Ten concepts for ethical practice and psychiatric care of transplant recipients and living organ donors                                                                                              | Surman O.S.                                                                                                   | 2010 |
| Long-term implant survival and success: a 10-16-year follow-up of non-submerged dental implants                                                                                                      | Simonis P.; Dufour T.; Tenenbaum H.                                                                           | 2010 |
| Nonsurgical treatment of retrograde peri-implantitis: a case report.                                                                                                                                 | Waasdrop J.; Reynolds M.                                                                                      | 2010 |
| Vertical ridge augmentation with autogenous bone grafts 3 years after loading: resorbable barriers versus titanium-reinforced barriers. A randomized controlled clinical trial.                      | Merli M.; Lombardini F.; Esposito M.                                                                          | 2010 |
| Immediate loading of two freestanding implants retaining a mandibular overdenture: 1-year pilot prospective study.                                                                                   | Liao K.Y.; Kan J.Y.; Rungcharassaeng K.; Lozada J.L.; Herford A.S.; Goodacre C.J.                             | 2010 |
| Bone alterations at implant-supported FDPs in relation to inter-unit distances: A 5-year radiographic study                                                                                          | Chang M.; Wennström J.L.                                                                                      | 2010 |
| Maximum use of the anterior maxillary buttress in severe maxillary atrophy with tilted, palatally positioned implants: a preliminary study.                                                          | Peñarrocha M.; Carrillo C.; Boronat A.; Peñarrocha M.                                                         | 2010 |
| Zirconia as a dental implant abutment material: a systematic review.                                                                                                                                 | Nakamura K.; Kanno T.; Milleding P.; Ortengren U.                                                             | 2010 |
| Oral Bisphosphonate-Associated Osteonecrosis of the Jaw After Implant Surgery: A Case Report and Literature Review                                                                                   | Bedogni A.; Bettini G.; Totola A.; Saia G.; Nocini P.F.                                                       | 2010 |
| Influence of graft quality and marginal bone loss on implants placed in maxillary grafted sinus: a finite element study.                                                                             | Inglam S.; Suebnukarn S.; Tharanon W.; Apatananon T.; Sithiseripratip K.                                      | 2010 |
| Retrospective study of implant-retained orbital prostheses: Implant survival and patient satisfaction                                                                                                | Karakoca Nemli S.; Aydin C.; Yilmaz H.; Sarisoy S.; Kasko Y.                                                  | 2010 |
| Low-level Er: YAG laser irradiation enhances osteoblast proliferation through activation of MAPK/ERK                                                                                                 | Aleksic V.; Aoki A.; Iwasaki K.; Takasaki A.A.; Wang C.-Y.; Abiko Y.; Ishikawa I.; Izumi Y.                   | 2010 |
| Total shoulder replacement for osteoarthritis in patients 80 years of age and older                                                                                                                  | Foruria A.M.; Sperling J.W.; Ankem H.K.; Oh L.S.; Cofield R.H.                                                | 2010 |
| Outcomes after implantation of the taxus paclitaxel-eluting stent in saphenous vein graft lesions: Results from the ARRIVE (TAXUS Peri-Approval Registry: A Multicenter Safety Surveillance) program | Brilakis E.S.; Lasala J.M.; Cox D.A.; Berger P.B.; Bowman T.S.; Starzyk R.M.; Dawkins K.D.                    | 2010 |
| Impact of successful and failed revascularization of chronic total occlusion on left ventricular function and infarct size                                                                           | Paul G.A.; Zia M.; Connelly K.A.; Fefer P.; Strauss B.H.; Dick A.J.; Wright G.A.                              | 2010 |
| Clinical application of titanium mesh with fixed dental implant increases initial-stage stability                                                                                                    | Wang L.-P.; Zhang S.-B.; Fan C.-B.; Fang Y.                                                                   | 2010 |
| Pectin-coated titanium implants are well-tolerated in vivo                                                                                                                                           | Kokkonen H.; Niiranen H.; Schols H.A.; Morra M.; Stenbäck F.; Tuukkanen J.                                    | 2010 |
| Assessment of endpoints in studies on peri-implantitis treatment--a systematic review.                                                                                                               | Faggion Jr. C.M.; Listl S.; Tu Y.K.                                                                           | 2010 |
| Marginal bone level changes and prosthetic maintenance of mandibular overdentures supported by 2 implants: A 5-Year randomized clinical trial                                                        | Cehreli M.C.; Uysal S.; Akca K.                                                                               | 2010 |
| Indirect sinus floor elevation for osseointegrated prostheses. A 10-year prospective study.                                                                                                          | Agamy E.M.; Niedermeier W.                                                                                    | 2010 |
| Immediate occlusal versus non-occlusal loading of single zirconia implants. A multicentre pragmatic randomised clinical trial.                                                                       | Cannizarro G.; Torchio C.; Felice P.; Leone M.; Esposito M.                                                   | 2010 |
| Factors affecting soft tissue level around anterior maxillary single-tooth implants                                                                                                                  | Nisapakultorn K.; Suphanantachat S.; Silkosessak O.; Rattanamongkolgul S.                                     | 2010 |
| Evaluation of implants coated with rhBMP-2 using two different coating strategies: a critical-size supraalveolar peri-implant defect study in dogs                                                   | Lee J.; Decker J.F.; Polimeni G.; Cortella C.A.; Rohrer M.D.; Wozney J.M.; Hall J.; Susin C.; Wikesjö U.M.    | 2010 |
| Treatment outcome and patient satisfaction with two adjacent implant-supported restorations in the esthetic zone.                                                                                    | Tymstra N.; Meijer H.J.; Stellingsma K.; Raghoobar G.M.; Vissink A.                                           | 2010 |
| Influence of frequent clinical probing during the healing phase on healthy peri-implant soft tissue formed at different titanium implant surfaces: A histomorphometrical study in dogs               | Schwarz F.; Mihatovic I.; Ferrari D.; Wieland M.; Becker J.                                                   | 2010 |
| Factors and techniques influencing peri-implant papillae                                                                                                                                             | Chow Y.C.; Wang H.-L.                                                                                         | 2010 |
| A new treatment concept for immediate loading of implants inserted in the edentulous mandible.                                                                                                       | Eccellente T.; Piombino M.; Piattelli A.; Perrotti V.; Iezzi G.                                               | 2010 |
| A mandibular implant-supported fixed complete dental prosthesis in a patient with sjogren syndrome: Case report                                                                                      | Spinato S.; Soardi C.M.; Zane A.M.                                                                            | 2010 |
| Periosteum-derived cells as an alternative to bone marrow cells for bone tissue engineering around dental implants. A histomorphometric study in beagle dogs                                         | Ribeiro F.V.; Suaid F.F.; Ruiz K.G.S.; Salmon C.R.; Paparotto T.; Nociti Jr. F.H.; Sallum E.A.; Casati M.Z.   | 2010 |
| Free gingival graft immobilization: a pilot study on a newly designed stent.                                                                                                                         | Hassani A.; Sadrimanesh R.; Vahdati S.A.; Sadr-eshkevari P.                                                   | 2010 |
| Biological width following immediate implant placement in the dog: Flap vs. flapless surgery                                                                                                         | Blanco J.; Alves C.C.; Nuñez V.; Aracil L.; Muñoz F.; Ramos I.                                                | 2010 |
| Evaluation of post-market performance of total hip arthroplasty devices using the kaiser permanente total joint replacement registry                                                                 | Paxton E.; Ake C.; Namba R.                                                                                   | 2010 |

|                                                                                                                                                                                                                  |                                                                                                                                                                                       |      |
|------------------------------------------------------------------------------------------------------------------------------------------------------------------------------------------------------------------|---------------------------------------------------------------------------------------------------------------------------------------------------------------------------------------|------|
| Surgical management of secondary tricuspid valve regurgitation: Annulus, commissure, or leaflet procedure?                                                                                                       | Navia J.L.; Nowicki E.R.; Blackstone E.H.; Brozzi N.A.; Nento D.E.; Atik F.A.; Rajeswaran J.; Gillinov A.M.; Svensson L.G.; Lytle B.W.                                                | 2010 |
| A biofilm approach to detect bacteria on removed spinal implants                                                                                                                                                 | Sampedro M.F.; Huddleston P.M.; Piper K.E.; Karau M.J.; Dekutoski M.B.; Yaszemski M.J.; Currier B.L.; Mandrekar J.N.; Osmon D.R.; McDowell A.; Patrick S.; Steckelberg J.M.; Patel R. | 2010 |
| Impact of defect configuration on the clinical outcome following surgical regenerative therapy of peri-implantitis                                                                                               | Schwarz F.; Sahm N.; Schwarz K.; Becker J.                                                                                                                                            | 2010 |
| Severity and pattern of peri-implantitis-associated bone loss                                                                                                                                                    | Fransson C.; Tomasi C.; Pikner S.S.; Gröndahl K.; Wennström J.L.; Leyland A.H.; Berglundh T.                                                                                          | 2010 |
| Influence of microgap location and configuration on peri-implant bone morphology in nonsubmerged implants: an experimental study in dogs.                                                                        | Wang D.; Nagata M.J.; Bell M.; de Melo L.G.; Bosco A.F.                                                                                                                               | 2010 |
| Peri-implant soft tissue and bone crest alterations at fixed dental prostheses: a 3-year prospective study.                                                                                                      | Chang M.; Wennström J.L.                                                                                                                                                              | 2010 |
| Comparison of two full-mouth approaches in the treatment of peri-implant mucositis: a pilot study.                                                                                                               | Thöne-Mühling M.; Swierkot K.; Nonnenmacher C.; Mutters R.; Flores-de-Jacoby L.; Mengel R.                                                                                            | 2010 |
| Advantages and esthetic results of erbium, chromium:yttrium-scandium-gallium-garnet laser application in second-stage implant surgery in patients with insufficient gingival attachment: A report of three cases | Arnabat-Domínguez J.; Bragado-Novel M.; España-Tost A.J.; Berini-Aytés L.; Gay-Escoda C.                                                                                              | 2010 |
| Parathormone, but not alendronate, improves osseointegration of dental titanium implants into the tibia in a rabbit model of ovariectomy plus glucocorticoid-induced osteoporosis                                | Largo R.; Almagro M.I.; Bellido M.; Román-Blas J.A.; Castañeda S.; Herrero-Baumont G.; Cortez R.                                                                                      | 2010 |
| Ten-year results of a three-arm prospective cohort study on implants in periodontally compromised patients. Part 1: implant loss and radiographic bone loss.                                                     | Roccuzzo M.; De Angelis N.; Bonino L.; Aglietta M.                                                                                                                                    | 2010 |
| Use of 4 immediately loaded zygomatic fixtures for retreatment of atrophic edentulous maxilla after complications of maxillary reconstruction                                                                    | Kuabara M.R.; Ferreira E.J.; Gulinelli J.L.; Panzarini S.R.                                                                                                                           | 2010 |
| Peri-implant bone level around implants with platform-switched abutments.                                                                                                                                        | Fickl S.; Zuhr O.; Stein J.M.; Hürzeler M.B.                                                                                                                                          | 2010 |
| In vitro antibacterial efficacy of tetracycline hydrochloride adsorbed onto Bio-Oss® bone graft                                                                                                                  | Dashti A.; Ready D.; Salih V.; Knowles J.C.; Barralet J.E.; Wilson M.; Donos N.; Nazhat S.N.                                                                                          | 2010 |
| Treatment outcome of extraoral implants in the craniofacial region                                                                                                                                               | Karayazgan-Saracoglu B.; Zulfikar H.; Atay A.; Gunay Y.                                                                                                                               | 2010 |
| Removable implant-prosthetic rehabilitation of the edentulous mandible: five-year results of different prosthetic anchorage concepts.                                                                            | Weinländer M.; Piehslinger E.; Krennmair G.                                                                                                                                           | 2010 |
| Estradiol and G1 reduce infarct size and improve immunosuppression after experimental stroke                                                                                                                     | Zhang B.; Subramanian S.; Dziennis S.; Jia J.; Uchida M.; Akiyoshi K.; Miglati E.; Lewis A.D.; Vandenbark A.A.; Offner H.; Hurn P.D.                                                  | 2010 |
| Risk and Fate of Cerebral Embolism After Transfemoral Aortic Valve Implantation. A Prospective Pilot Study With Diffusion-Weighted Magnetic Resonance Imaging                                                    | Ghanem A.; Müller A.; Nähle C.P.; Kocurek J.; Werner N.; Hammerstingl C.; Schild H.H.; Schwab J.O.; Mellert F.; Fimmers R.; Nickenig G.; Thomas D.                                    | 2010 |
| Fluid exudates from inflamed bone-anchored hearing aids demonstrate elevated levels of cytokines and biomarkers of tissue and bone metabolism.                                                                   | Grant M.M.; Monksfield P.; Proops D.; Brine M.; Addison O.; Sammons R.L.; Matthews J.B.; Reid A.; Chapple I.L.                                                                        | 2010 |
| A prospective, multicenter, randomized-controlled 5-year study of hybrid and fully etched implants for the incidence of peri-implantitis                                                                         | Zetterqvist L.; Feldman S.; Rotter B.; Vincenzi G.; Wennström J.L.; Chierico A.; Stach R.M.; Kenealy J.N.                                                                             | 2010 |
| Effects of soft tissue punch size on the healing of peri-implant tissue in flapless implant surgery                                                                                                              | Lee D.-H.; Choi B.-H.; Jeong S.-M.; Xuan F.; Kim H.-R.; Mo D.-Y.                                                                                                                      | 2010 |
| Effectiveness of 980-nm diode and 1064-nm extra-long-pulse neodymium-doped yttrium aluminum garnet lasers in implant disinfection.                                                                               | Gonçalves F.; Zanetti A.L.; Zanetti R.V.; Martelli F.S.; Avila-Campos M.J.; Tomazinho L.F.; Granjeiro J.M.                                                                            | 2010 |
| Influence of interimplant distances and placement depth on peri-implant bone remodeling of adjacent and immediately loaded Morse cone connection implants: a histomorphometric study in dogs                     | Barros R.R.M.; Novaes A.B.; Muglia V.A.; Iezzi G.; Piattelli A.                                                                                                                       | 2010 |
| Immediate loading of full-arch fixed prostheses supported by axial and tilted implants for the treatment of edentulous atrophic mandibles.                                                                       | Agliardi E.; Clericò M.; Ciancio P.; Massironi D.                                                                                                                                     | 2010 |
| Do patients with rheumatoid arthritis exhibit differential cellular responses to implant wear debris and do the implant failure mechanisms differ from non-RA patients?                                          | Vasudevan A.; DiCarlo E.F.; Wright T.; Chen D.; Goldring S.R.; Mandl L.A.                                                                                                             | 2010 |
| Prophylaxis for venous thrombo-embolism in neurocritical care: A critical appraisal                                                                                                                              | Raslan A.M.; Fields J.D.; Bhardwaj A.                                                                                                                                                 | 2010 |
| Cell salvage and re-infusion: Experiences with a new device                                                                                                                                                      | Froessler B.; Bauze A.                                                                                                                                                                | 2010 |
| Incidence, range and clinical impact of hemoglobin decrease after transradial coronary stenting and maximal antiplatelet therapy                                                                                 | Bertrand O.F.; Rodes-Cabau J.; Larose E.; Rinfret S.; Dery J.-P.; Gleeton O.; Nguyen C.M.; Proulx G.; Roy L.; Costerousse O.; Poirier P.; Larochelliere R.D.                          | 2010 |
| Peri-implant parameters in head and neck reconstruction: Influence of extraoral skin or intraoral mucosa                                                                                                         | Kwon Y.-D.; Karbach J.; Wagner W.; Al-Nawas B.                                                                                                                                        | 2010 |
| Which device is more accurate to determine the stability mobility of dental implants? A human cadaver study                                                                                                      | Tözüm T.F.; Bal B.T.; Turkyilmaz I.; Gülay G.; Tulunoğlu I.                                                                                                                           | 2010 |
| Outcome of implant-supported single-tooth replacements performed by dental students. A 10-year clinical and radiographic retrospective study.                                                                    | Bonde M.J.; Stokholm R.; Isidor F.; Schou S.                                                                                                                                          | 2010 |
| Oral health maintenance dental implants.                                                                                                                                                                         | Kracher C.M.; Smith W.S.                                                                                                                                                              | 2010 |
| Prospective clinical evaluation of 307 single-tooth morse taper-connection implants: a multicenter study.                                                                                                        | Mangano C.; Mangano F.; Piattelli A.; Iezzi G.; Mangano A.; La Colla L.                                                                                                               | 2010 |
| Osseointegration--the influence of implant surface.                                                                                                                                                              | Ivanovski S.                                                                                                                                                                          | 2010 |

|                                                                                                                                                                                                                             |                                                                                                   |      |
|-----------------------------------------------------------------------------------------------------------------------------------------------------------------------------------------------------------------------------|---------------------------------------------------------------------------------------------------|------|
| Connective tissue grafts for thickening peri-implant tissues at implant placement. One-year results from an explanatory split-mouth randomised controlled clinical trial.                                                   | Wiesner G.; Esposito M.; Worthington H.; Schlee M.                                                | 2010 |
| Clinical outcome of root-shaped dental implants of various diameters: 5-year results.                                                                                                                                       | Krennmair G.; Seemann R.; Schmidinger S.; Ewers R.; Piehslinger E.                                | 2010 |
| Postsurgical care for rehabilitation with implant-retained extraoral prostheses                                                                                                                                             | Goiato M.C.; Takamiya A.S.; Alves L.M.N.; Dos Santos D.M.                                         | 2010 |
| Early implant loading after vertical ridge augmentation (VRA) using e-PTFE titanium-reinforced membrane and nano-structured hydroxyapatite: 2-year prospective study.                                                       | Canullo L.; Sisti A.                                                                              | 2010 |
| The microbiota associated with implants restored with platform switching: A preliminary report                                                                                                                              | Canullo L.; Quaranta A.; Teles R.P.                                                               | 2010 |
| Tooth-implant connection: A bibliographic review                                                                                                                                                                            | Hita-Carrillo C.; Hernández-Aliaga M.; Calvo-Guirado J.-L.                                        | 2010 |
| Evaluation of 316 narrow diameter implants followed for 5-10 years: A clinical and radiographic retrospective study                                                                                                         | Arsan V.; Bölükbaş N.; Ersanli S.; Özdemir T.                                                     | 2010 |
| Early loading of implants in vertically augmented bone with non-resorbable membranes and deproteinised anorganic bovine bone. An uncontrolled prospective cohort study.                                                     | Todisco M.                                                                                        | 2010 |
| Early loading of implants with fixed dental prostheses in edentulous mandibles: 4.5-year clinical results from a prospective study                                                                                          | Schwarz S.; Gabbert O.; Hassel A.J.; Schmitter M.; Séché C.; Rammelsberg P.                       | 2010 |
| Sinus bone graft using new alloplastic bone graft material (Osteon)-II: clinical evaluation                                                                                                                                 | Bae J.-H.; Kim Y.-K.; Kim S.-G.; Yun P.-Y.; Kim J.-S.                                             | 2010 |
| Osseointegration of orthodontic micro-screws after immediate and early loading                                                                                                                                              | Zhang L.; Zhao Z.; Li Y.; Wu J.; Zheng L.; Tang T.                                                | 2010 |
| The immunology of fibrosis: innate and adaptive responses                                                                                                                                                                   | Wick G.; Backovic A.; Rabensteiner E.; Plank N.; Schwentner C.; Sgonc R.                          | 2010 |
| Prevalence of peri-implantitis related to severity of the disease with different degrees of bone loss                                                                                                                       | Koldslund O.C.; Scheie A.A.; Aass A.M.                                                            | 2010 |
| Comparison of the effects of treatment of peri-implant infection in animal and human studies: Systematic review and meta-analysis                                                                                           | Faggion Jr. C.M.; Chambrone L.; Gondim V.; Schmitter M.; Tu Y.-K.                                 | 2010 |
| Rationale for esthetic tissue preservation of a fresh extraction socket by an implant treatment concept simulating a tooth replantation                                                                                     | Trimpou G.; Weigl P.; Krebs M.; Parvini P.; Nentwig G.-H.                                         | 2010 |
| Dental implants placed into alveolar clefts reconstructed with tongue flaps and bone grafts                                                                                                                                 | Sándor G.K.B.; Carmichael R.P.; Brkovic B.M.B.                                                    | 2010 |
| Assessing peri-implant tissue infection prevention in a percutaneous model                                                                                                                                                  | Perry E.L.; Beck J.P.; Williams D.L.; Bloebaum R.D.                                               | 2010 |
| Implant dentistry in disabled patients rehabilitation                                                                                                                                                                       | Fabbri G.; Cristini A.; Pozzani E.; Guerrini F.                                                   | 2010 |
| Psychopathology in patients with icds over time: Results of a prospective study                                                                                                                                             | Kapa S.; Rotondi-Trevisan D.; Mariano Z.; Aves T.; Irvine J.; Dorian P.; Hayes D.L.               | 2010 |
| Perioperative chemotherapy with bevacizumab and liver resection for colorectal cancer liver metastasis                                                                                                                      | Chaudhury P.; Hassanain M.; Bouganin N.; Salman A.; Kavan P.; Metrakos P.                         | 2010 |
| Design of the carotid revascularization endarterectomy vs. stenting trial (CREST)                                                                                                                                           | Sheffet A.J.; Roubin G.; Howard G.; Howard V.; Moore W.; Meschia J.F.; Hobson II R.W.; Brott T.G. | 2010 |
| Extracorporeal shock wave therapy: A potential adjuvant treatment for peri-implantitis                                                                                                                                      | Li X.; Chen M.; Li L.; Qing H.; Zhu Z.                                                            | 2010 |
| Implant prosthodontic rehabilitation of patients with rheumatic disorders: a case series report.                                                                                                                            | Weinlander M.; Krennmair G.; Piehslinger E.                                                       | 2010 |
| Quantitative assessment of orthodontic mini-implant displacement: the effect of initial force application.                                                                                                                  | Holst A.I.; Karl M.; Karolczak M.; Goellner M.; Holst S.                                          | 2010 |
| Marginal bone loss and prosthetic maintenance of bar-retained implant-supported overdentures: a prospective study.                                                                                                          | Akca K.; Cehreli M.C.; Uysal S.                                                                   | 2010 |
| Numerical simulation of the effect of time-to-loading on peri-implant bone                                                                                                                                                  | Akça K.; Eser A.; Canay S.                                                                        | 2010 |
| Dental implants placed simultaneously with bone grafts in horizontal defects: a clinical retrospective study with 37 patients.                                                                                              | Boronat A.; Carrillo C.; Penarrocha M.; Pennarrocha M.                                            | 2010 |
| Endosseous implant anchorage is critically dependent on mechanostuctural determinants of peri-implant bone trabeculae                                                                                                       | Gabet Y.; Kohavi D.; Voide R.; Mueller T.L.; Müller R.; Bab I.                                    | 2010 |
| Technical problems and complications in the removal of the less invasive stabilization system                                                                                                                               | Suzuki T.; Smith W.R.; Stahel P.F.; Morgan S.J.; Baron A.J.; Hak D.J.                             | 2010 |
| The correlation between crown-implant ratios and marginal bone resorption: a preliminary clinical study.                                                                                                                    | Gomez-Polo M.; Bartens F.; Sala L.; Tamini F.; Celemin A.; Del Rio J.                             | 2010 |
| Evaluation of transobturator tapes (E-TOT) study: randomised prospective single-blinded study comparing inside-out vs. outside-in transobturator tapes in management of urodynamic stress incontinence: Short term outcomes | Abdel-fattah M.; Ramsay I.; Pringle S.; Hardwick C.; Ali H.                                       | 2010 |
| Stress and periodontal health                                                                                                                                                                                               | Strooker H.; de Geus E.; van der Reijden W.A.; Laine M.L.; van Winkelhoff A.J.                    | 2010 |
| Clinical and radiographic study of implant treatment outcome in periodontally susceptible and non-susceptible patients: A prospective long-term study                                                                       | De Boever A.L.; Quirynen M.; Coucke W.; Theuniers G.; De Boever J.A.                              | 2009 |
| The effect of a triclosan dentifrice on mucositis in subjects with dental implants: A six-month clinical study                                                                                                              | Ramberg P.; Lindhe J.; Botticelli D.; Botticelli. A.                                              | 2009 |
| History of treated periodontitis and smoking as risks for implant therapy.                                                                                                                                                  | Heitz-Mayfield L.J.; Huynh-Ba G.                                                                  | 2009 |
| Vertical ridge augmentation of the atrophic posterior mandible with interpositional bloc grafts: Bone from the iliac crest vs. bovine anorganic                                                                             | Felice P.; Marchetti C.; Iezzi G.; Piattelli A.; Worthington H.; Pellegrino G.; Esposito M.       | 2009 |

|                                                                                                                                                                                                                                                                                         |                                                                                                                                                                              |      |
|-----------------------------------------------------------------------------------------------------------------------------------------------------------------------------------------------------------------------------------------------------------------------------------------|------------------------------------------------------------------------------------------------------------------------------------------------------------------------------|------|
| bone. Clinical and histological results up to one year after loading from a randomized-controlled clinical trial                                                                                                                                                                        |                                                                                                                                                                              |      |
| Zirconium dioxide implant abutments for posterior single-tooth replacement: First results                                                                                                                                                                                               | Nothdurft F.P.; Pospiech P.R.                                                                                                                                                | 2009 |
| Endodontic treatment of teeth induces retrograde peri-implantitis                                                                                                                                                                                                                       | Zhou W.; Han C.; Li D.; Li Y.; Song Y.; Zhao Y.                                                                                                                              | 2009 |
| A case of rapidly progressive peri-implantitis around a short sintered porous-surfaced implant.                                                                                                                                                                                         | Malchiodi L.; Cucchi A.; Ghensi P.; Bondi V.                                                                                                                                 | 2009 |
| Oral health and oral implant status in edentulous patients with implant-supported dental prostheses who are receiving long-term nursing care.                                                                                                                                           | Isaksson R.; Becktor J.P.; Brown A.; Laurizohn C.; Isaksson S.                                                                                                               | 2009 |
| Clinical outcome of submerged vs. non-submerged implants placed in fresh extraction sockets                                                                                                                                                                                             | Cordaro L.; Torsello F.; Roccuzzo M.                                                                                                                                         | 2009 |
| Clinical and esthetic outcomes of implants placed in postextraction sites.                                                                                                                                                                                                              | Chen S.T.; Buser D.                                                                                                                                                          | 2009 |
| Implant loading protocols for partially edentulous maxillary posterior sites.                                                                                                                                                                                                           | Roccuzzo M.; Aglietta M.; Cordaro L.                                                                                                                                         | 2009 |
| Implant loading protocols for the partially edentulous posterior mandible.                                                                                                                                                                                                              | Cordaro L.; Torsello F.; Roccuzzo M.                                                                                                                                         | 2009 |
| Comparative analysis of peri-implant marginal bone loss based on microthread location: A 1-year prospective study after loading                                                                                                                                                         | Song D.-W.; Lee D.-W.; Kim C.-K.; Park K.-H.; Moon I.-S.                                                                                                                     | 2009 |
| Immediate implant placement after removal of a failed implant: a clinical and histological case report.                                                                                                                                                                                 | Covani U.; Marconcini S.; Crespi R.; Barone A.                                                                                                                               | 2009 |
| Early loading of nonsubmerged titanium implants with a chemically modified sand-blasted and acid-etched surface: 6-month results of a prospective case series study in the posterior mandible focusing on peri-implant crestal bone changes and implant stability quotient (ISQ) values | Bornstein M.M.; Hart C.N.; Halbritter S.A.; Morton D.; Buser D.                                                                                                              | 2009 |
| Comparative analysis of immediate functional loading and immediate nonfunctional loading to traditional healing periods: A 5-year follow-up of 550 dental implants                                                                                                                      | Degidi M.; Iezzi G.; Perrotti V.; Piattelli A.                                                                                                                               | 2009 |
| CaPO4 blasted implants inserted into iliac crest homologue frozen grafts.                                                                                                                                                                                                               | Franco M.; Rigo L.; Viscione A.; De Santis B.; Tropina E.; Brunelli G.; Guidi R.; Avantaggiato A.; Carinci F.                                                                | 2009 |
| Alveolar bone regeneration by transplantation of periodontal ligament stem cells and bone marrow stem cells in a canine peri-implant defect model: A pilot study                                                                                                                        | Kim S.-H.; Kim K.-H.; Seo B.-M.; Koo K.-T.; Kim T.-I.; Seol Y.-J.; Ku Y.; Rhyu I.-C.; Chung C.-P.; Lee Y.-M.                                                                 | 2009 |
| Bone-anchored titanium implants for auricular rehabilitation: Case report and review of literature                                                                                                                                                                                      | Gumieiro E.H.; Dib L.L.; Jahn R.S.; Dos Santos Jr. J.F.; Nannmark U.; Granström G.; Abrahão M.                                                                               | 2009 |
| A 3-year clinical and radiographic study of implants placed simultaneously with maxillary sinus floor augmentations using a new nanocrystalline hydroxyapatite.                                                                                                                         | Heinemann F.; Mundt T.; Biffar R.; Gedrange T.; Goetz W.                                                                                                                     | 2009 |
| Soft tissue stability with immediate implants and concave abutments.                                                                                                                                                                                                                    | Redemagni M.; Cremonesi S.; Garlini G.; Maiorana C.                                                                                                                          | 2009 |
| Influence of the implant cervical topography on the crestal bone resorption and immediate implant survival.                                                                                                                                                                             | Heinemann F.; Bourauel C.; Hasan I.; Gedrange T.                                                                                                                             | 2009 |
| Edentulous site enhancement: A regenerative approach to the management of edentulous areas. Part 2: Peri-implant tissues                                                                                                                                                                | Calesini G.; Micarelli C.; Coppe S.; Scipioni A.                                                                                                                             | 2009 |
| Methods to avoid dental implant failure and disadvantages                                                                                                                                                                                                                               | Schmage P.                                                                                                                                                                   | 2009 |
| Bacterial adhesion on smooth and rough titanium surfaces after treatment with different instruments                                                                                                                                                                                     | Duarte P.M.; Reis A.F.; Freitas P.M.D.; Ota-Tsuzuki C.                                                                                                                       | 2009 |
| Management of Vascular and Nonvascular Complications After Renal Transplantation                                                                                                                                                                                                        | Hedegard W.; Saad W.E.A.; Davies M.G.                                                                                                                                        | 2009 |
| Guidelines for patient selection and performance of carotid artery stenting                                                                                                                                                                                                             | Bladin C.; Chambers B.; New G.; Denton M.; Lawrence-Brown M.; Levi C.; David Muller D.; Davis S.; Donnan G.; Crimmins D.; Frayne J.; Phatourous C.; Scroop R.; Harrington T. | 2009 |
| Economic analysis of dabigatran etexilate in the primary prevention of venous thromboembolism after a total hip and knee arthroplasty                                                                                                                                                   | Monreal M.; González-Rojas N.; Vieta A.; Wolowacz S.E.                                                                                                                       | 2009 |
| Quantitation of changes in VWF and FVIII following elective orthopedic surgery in normal individuals                                                                                                                                                                                    | Kahlon A.; Grabell J.; Tuttle A.; Engen D.; Hopman W.; Lillicrap D.; James P.                                                                                                | 2009 |
| Effect of surface topography of screw-shaped titanium implants in humans on clinical and radiographic parameters: A 12-year prospective study                                                                                                                                           | Vroom M.G.; Sipos P.; De Lange G.L.; Gründemann L.J.M.M.; Timmerman M.F.; Loos B.G.; Van Der Velden U.                                                                       | 2009 |
| Microsurgical reconstruction of the jaw with fibular grafts and implants.                                                                                                                                                                                                               | Raoul G.; Ruhin B.; Briki S.; Lauwers L.; Haurou Patou G.; Capet J.P.; Maes J.M.; Ferri J.                                                                                   | 2009 |
| Implant-supported fixed cantilever prosthesis in partially edentulous jaws: A cohort prospective study                                                                                                                                                                                  | Romeo E.; Tomasi C.; Finini I.; Casentini P.; Lops D.                                                                                                                        | 2009 |
| The use of extraoral implants for distal-extension removable dentures: a clinical evaluation up to 8 years.                                                                                                                                                                             | Minoretti R.; Triaca A.; Saulacic N.                                                                                                                                         | 2009 |
| Laser wavelengths and oral implantology                                                                                                                                                                                                                                                 | Romanos G.E.; Gutknecht N.; Dieter S.; Schwarz F.; Crespi R.; Sculean A.                                                                                                     | 2009 |
| One-step oral rehabilitation by means of implants' insertion, Le Fort I, grafts, and immediate loading.                                                                                                                                                                                 | Grecchi F.; Zollino I.; Parafioriti A.; Mineo G.; Pricolo A.; Carinci F.                                                                                                     | 2009 |
| Facial gingival tissue stability after connective tissue graft with single immediate tooth replacement in the esthetic zone: consecutive case report.                                                                                                                                   | Kan J.Y.; Rungcharassaeng K.; Morimoto T.; Lozada J.                                                                                                                         | 2009 |
| The potential of the horizontal ramus of the mandible as a donor site for block and particular grafts in pre-implant surgery                                                                                                                                                            | Soehardi A.; Meijer G.J.; Strooband V.F.M.H.; de Koning M.; Stoelinga P.J.W.                                                                                                 | 2009 |
| Maternal complications and pregnancy outcome in women with mechanical prosthetic heart valves treated with enoxaparin                                                                                                                                                                   | McLintock C.; McCowan L.M.E.; North R.A.                                                                                                                                     | 2009 |

|                                                                                                                                                                                                             |                                                                                                                      |      |
|-------------------------------------------------------------------------------------------------------------------------------------------------------------------------------------------------------------|----------------------------------------------------------------------------------------------------------------------|------|
| The Carotid Revascularization Endarterectomy vs. Stenting Trial completes randomization: Lessons learned and anticipated results                                                                            | Lal B.K.; Brott T.G.                                                                                                 | 2009 |
| Five-year evaluation of the influence of keratinized mucosa on peri-implant soft-tissue health and stability around implants supporting full-arch mandibular fixed prostheses                               | Schrott A.R.; Jimenez M.; Hwang J.-W.; Fiorellini J.; Weber H.-P.                                                    | 2009 |
| Influence of abutment design on clinical status of peri-implant tissues                                                                                                                                     | Taiyeb-Ali T.B.; Toh C.G.; Siar C.H.; Seiz D.; Ong S.T.                                                              | 2009 |
| Assessment of replication of research evidence from animals to humans in studies on peri-implantitis therapy                                                                                                | Faggion Jr. C.M.; Schmitter M.; Tu Y.-K.                                                                             | 2009 |
| Dimensional ridge alterations following immediate implant placement in molar extraction sites: A six-month prospective cohort study with surgical re-entry                                                  | Matarasso S.; Salvi G.E.; Iorio Siciliano V.; Cafiero C.; Blasi A.; Lang N.P.                                        | 2009 |
| Application of antimicrobial photodynamic therapy in periodontal and peri-implant diseases                                                                                                                  | Takasaki A.A.; Aoki A.; Mizutani K.; Schwarz F.; Sculean A.; Wang C.-Y.; Koshy G.; Romanos G.; Ishikawa I.; Izumi Y. | 2009 |
| The impact of laser application on periodontal and peri-implant wound healing                                                                                                                               | Schwarz F.; Aoki A.; Sculean A.; Becker J.                                                                           | 2009 |
| Economic analysis of dabigatran etexilate for the primary prevention of venous thromboembolism following total hip or knee replacement in Spain                                                             | Gonzalez-Rojas N.; Vieta A.; Monreal M.; Wolowacz S.E.                                                               | 2009 |
| A critical and ironic instant in science and attitude of health personnel                                                                                                                                   | De Bruyn H.                                                                                                          | 2009 |
| Implant periapical lesion a case series report                                                                                                                                                              | Rosendahl K.; Dahlberg G.; Kisch J.; Nilner K.                                                                       | 2009 |
| Bone ingrowth on the surface of endosseous implants. Part 1: Mathematical model                                                                                                                             | Moreo P.; García-Aznar J.M.; Doblaré M.                                                                              | 2009 |
| Re-osseointegration on previously contaminated surfaces: A systematic review                                                                                                                                | Renvert S.; Polyzois I.; Maguire R.                                                                                  | 2009 |
| Apical peri-implantitis: Possible predisposing factors, case reports, and surgical treatment suggestions                                                                                                    | Dahlin C.; Nikfarid H.; Alsén B.; Kashani H.                                                                         | 2009 |
| Surgical regenerative treatment of peri-implantitis lesions using a nanocrystalline hydroxyapatite or a natural bone mineral in combination with a collagen membrane: A four-year clinical follow-up report | Schwarz F.; Sahm N.; Bieling K.; Becker J.                                                                           | 2009 |
| Plaque accumulation on exposed titanium surfaces and peri-implant tissue behavior. A preliminary 1-year clinical study.                                                                                     | Baldi D.; Menini M.; Pera F.; Ravera G.; Pera P.                                                                     | 2009 |
| Implant surfaces and design (Working Group 4)                                                                                                                                                               | Lang N.P.; Jepsen S.                                                                                                 | 2009 |
| Periodontal and periimplant maintenance: a critical factor in long-term treatment success.                                                                                                                  | Shumaker N.D.; Metcalf B.T.; Toscano N.T.; Holtzclaw D.J.                                                            | 2009 |
| Biomimetic ceramics in implant dentistry                                                                                                                                                                    | Padial-Molina M.; Galindo-Moreno P.; Avila-Ortiz G.                                                                  | 2009 |
| Clinical outcomes of GBR procedures to correct peri-implant dehiscences and fenestrations: A systematic review                                                                                              | Chiapasco M.; Zaniboni M.                                                                                            | 2009 |
| To what extent does the crown-implant ratio affect the survival and complications of implant-supported reconstructions? A systematic review                                                                 | Blanes R.J.                                                                                                          | 2009 |
| Survival and complication rates of implant-supported fixed partial dentures with cantilevers: A systematic review                                                                                           | Zurdo J.; Romão C.; Wennström J.L.                                                                                   | 2009 |
| Biomechanical study of mandible bone supporting a four-implant retained bridge. Finite element analysis of the influence of bone anisotropy and foodstuff position                                          | Bonnet A.S.; Postaire M.; Lipinski P.                                                                                | 2009 |
| Problems with dental implants that were placed on vertically distracted fibular free flaps after resection: A report of six cases                                                                           | Lizio G.; Corinaldesi G.; Pieri F.; Marchetti C.                                                                     | 2009 |
| Mandibular overdentures supported by two brånemark, IMZ or ITI implants: A ten-year prospective randomized study                                                                                            | Meijer H.J.A.; Raghoobar G.M.; Batenburg R.H.K.; Vissink A.                                                          | 2009 |
| Factors that influence the position of the peri-implant soft tissues: A review                                                                                                                              | Sorní-Bröker M.; Peñarrocha-Diogo M.; Peñarrocha-Diogo M.                                                            | 2009 |
| Redefining the success rate of bulking agents: Role of composite endpoints                                                                                                                                  | Renganathan A.; Errichiello L.; Robinson D.; Cardozo L.D.                                                            | 2009 |
| Evaluation of peri-implant tissue in nonsubmerged dental implants: a multicenter retrospective study                                                                                                        | Kim Y.-K.; Kim S.-G.; Oh H.-K.; Choi Y.-G.; Cho Y.-S.; Oh Y.-H.; Son J.-S.; Ong J.L.                                 | 2009 |
| Determinants of heterotopic ossification after total hip replacement surgery                                                                                                                                | Fransen M.; Neal B.; Cameron I.D.; Crawford R.; Tregonning G.; Winstanley J.; Norton R.                              | 2009 |
| Maxillary sinus floor elevation using the (transalveolar) osteotome technique with or without grafting material. Part I: Implant survival and patients' perception                                          | Pjetursson B.E.; Rast C.; Brägger U.; Schmidlin K.; Zwahlen M.; Lang N.P.                                            | 2009 |
| Transalveolar maxillary sinus floor elevation using osteotomes with or without grafting material. Part II: Radiographic tissue remodeling                                                                   | Pjetursson B.E.; Ignjatovic D.; Matuliene G.; Brägger U.; Schmidlin K.; Lang N.P.                                    | 2009 |
| Professional and patient-based evaluation of oral rehabilitation in patients with tooth agenesis                                                                                                            | Dueled E.; Gotfredsen K.; Damsgaard M.T.; Hede B.                                                                    | 2009 |
| Comparison between implants inserted with and without computer planning and custom model coordination                                                                                                       | Danza M.; Zollino I.; Carinci F.                                                                                     | 2009 |
| Peri-procedural anticoagulation management of mechanical prosthetic heart valve patients                                                                                                                    | Daniels P.R.; McBane R.D.; Litin S.C.; Ward S.A.; Hodge D.O.; Dowling N.F.; Heit J.A.                                | 2009 |
| Bacterial colonization of oral implants from nondental sources                                                                                                                                              | Emrani J.; Chee W.; Slots J.                                                                                         | 2009 |
| The use of CO2 laser in the treatment of peri-implantitis                                                                                                                                                   | Romanos G.; Ko H.-H.; Froum S.; Tarnow D.                                                                            | 2009 |
| Five-year results of fixed implant-supported rehabilitations with distal cantilevers for the edentulous mandible                                                                                            | Gallucci G.O.; Doughtie C.B.; Hwang J.W.; Fiorellini J.P.; Weber H.-P.                                               | 2009 |

|                                                                                                                                                                                    |                                                                                                                                                      |      |
|------------------------------------------------------------------------------------------------------------------------------------------------------------------------------------|------------------------------------------------------------------------------------------------------------------------------------------------------|------|
| A review of dental implants and infection                                                                                                                                          | Pye A.D.; Lockhart D.E.A.; Dawson M.P.; Murray C.A.; Smith A.J.                                                                                      | 2009 |
| Bone-integration and bone-biomimicry of dental implants: Role of peri-implant infections                                                                                           | Sánchez-Espinel J.A.; Sánchez-Porto A.                                                                                                               | 2009 |
| Clinical outcome of overdenture treatment on two nonsubmerged and nonsplinted astra tech microthread™ Implants                                                                     | De Bruyn H.; Besseler J.; Raes F.; Vaneker M.                                                                                                        | 2009 |
| Clinical evaluation of two-implant-supported single molar restoration                                                                                                              | Bi W.; Yu Y.; Wang Q.; Gong Y.; Sun J.                                                                                                               | 2009 |
| The biologic width around titanium implants: histometric analysis of the implantogingival junction around immediately and early loaded implants.                                   | Bakaeen L.; Quinlan P.; Schoolfield J.; Lang N.P.; Cochran D.L.                                                                                      | 2009 |
| Influence of early cover screw exposure on crestal bone loss around implants: intraindividual comparison of bone level at exposed and non-exposed implants                         | Kim T.-H.; Lee D.-W.; Kim C.-K.; Park K.-H.; Moon I.-S.                                                                                              | 2009 |
| Bone quality and the immediate loading of implants-critical aspects based on literature, research, and clinical experience                                                         | Romanos G.E.                                                                                                                                         | 2009 |
| Miniscrews in orthodontics                                                                                                                                                         | Peuch-Lestrade G.-R.; Le Marie M.; Guillaumot G.; Decker A.                                                                                          | 2009 |
| Clinical and radiographic comparison of implants in regenerated or native bone: 5-year results                                                                                     | Benić G.I.; Jung R.E.; Siegenthaler D.W.; Hämmerle C.H.F.                                                                                            | 2009 |
| Er,Cr:YSGG laser assisted surgical treatment of peri-implantitis with one year re-entry and 18 months follow-up: A case report                                                     | Azzeh M.                                                                                                                                             | 2009 |
| Short-term bone level observations associated with platform switching in immediately placed and restored single maxillary implants: a preliminary report.                          | Canullo L.; Goglia G.; Iurlaro G.; Iannello G.                                                                                                       | 2009 |
| A systematic review of the survival and complication rates of implant supported fixed dental prostheses with cantilever extensions after an observation period of at least 5 years | Aglietta M.; Siciliano V.I.; Zwahlen M.; Brägger U.; Pjetursson B.E.; Lang N.P.; Salvi G.E.                                                          | 2009 |
| Development of novel implant abutments using the shape memory alloy nitinol: preliminary results.                                                                                  | Pautke C.; Kolk A.; Brokate M.; Wehrstedt J.C.; Kneissl F.; Miethke T.; Steinhäuser E.; Horch H.H.; Deppe H.                                         | 2009 |
| Comparison of five parameters as risk factors for peri-mucositis.                                                                                                                  | Karbach J.; Callaway A.; Kwon Y.D.; d'Hoedt B.; Al-Nawas B.                                                                                          | 2009 |
| Soft tissues healing at immediate transmucosal implants placed into molar extraction sites with buccal self-contained dehiscences. A 12-month controlled clinical trial            | Siciliano V.I.; Salvi G.E.; Matarasso S.; Cafiero C.; Blasi A.; Lang N.P.                                                                            | 2009 |
| Dental implants in persons with severe epilepsy and multiple disabilities: a long-term retrospective study.                                                                        | Cune M.S.; Strooker H.; van der Reijden W.A.; de Putter C.; Laine M.L.; Verhoeven J.W.                                                               | 2009 |
| Gingivomorphometry - Esthetic evaluation of the crown-mucogingival complex: A new method for collection and measurement of standardized and reproducible data in oral photography  | Weinländer M.; Lekovic V.; Spadjier-Gostovic S.; Milicic B.; Krennmair G.; Plenck H.                                                                 | 2009 |
| Evaluation of Er,Cr:YSGG laser effects on debridement of dental implants. (SEM evaluation)                                                                                         | Fekrazd R.; Gholami G.A.; Lotfi Gh.; Kalhori K.                                                                                                      | 2009 |
| Laser application in oral surgery and in periodontics                                                                                                                              | Zeinoun T.                                                                                                                                           | 2009 |
| A novel design for a randomized trial to test if icd implantation without any defibrillation testing is as effective as standard treatment                                         | Healey J.S.; Hohnloser S.H.; Glikson M.; Neuzner J.; Kautzner J.; Gadler F.; Mabo P.; Vinolas X.; Van Erven L.; Appl U.; Gilkerson J.; Connolly S.J. | 2009 |
| IVUS-guided management of late stent malapposition with peri-stent restenosis with coronary artery aneurysm following drug-eluting stent implantation (paxlitaxel-eluting stent)   | Lanjewar C.P.; Sharma A.; Sheth T.                                                                                                                   | 2009 |
| Primary stenting for recurrent stenosis following carotid endarterectomy                                                                                                           | Bussière M.; Pelz D.; Lownie S.                                                                                                                      | 2009 |
| Secondary stroke prevention strategies for the oldest patients: Possibilities and challenges                                                                                       | Bushnell C.D.; Colón-Emeric C.S.                                                                                                                     | 2009 |
| Effects of decontamination and implant surface characteristics on re-osseointegration following treatment of peri-implantitis                                                      | Parlar A.; Bosshardt D.D.; Etiner D.; Schaferoth D.; Ünsal B.; Hayta C.; Lang N.P.                                                                   | 2009 |
| Successful outcome of splinted implants supporting a 'planned' maxillary overdenture: A retrospective evaluation and comparison with fixed full dental prostheses                  | Sanna A.; Nuytens P.; Naert I.; Quirynen M.                                                                                                          | 2009 |
| Infectious complications with dental implants                                                                                                                                      | van Winkelhoff A.J.; van der Avoort P.G.; Wismeijer D.                                                                                               | 2009 |
| Use of sintered porous-surfaced dental implants to restore single teeth in the maxilla: a 7- to 9-year follow-up.                                                                  | MacDonald K.; Pharoah M.; Todescan R.; Deporter D.                                                                                                   | 2009 |
| Effects of implant geometry, surface properties, and TGF-β1 on peri-implant bone response: An experimental study in goats                                                          | Schouten C.; Meijer G.J.; Van Den Beucken J.J.J.P.; Spauwen P.H.M.; Jansen J.A.                                                                      | 2009 |
| Clinical and microbiological determinants of ailing dental implants                                                                                                                | Tabanella G.; Nowzari H.; Slots J.                                                                                                                   | 2009 |
| Clinical assessment of peri-implant tissues in patients with varying severity of chronic periodontitis                                                                             | Aloufi F.; Bissada N.; Ficara A.; Faddoul F.; Al-Zahrani M.S.                                                                                        | 2009 |
| Clinical peri-implant sounding accuracy in the presence of chronic inflammation of peri-implant tissues. Clinical observation study.                                               | Romeo E.; Lops D.; Storelli S.; Ghisolfi M.                                                                                                          | 2009 |
| Role of fibroblast populations in peri-implantitis.                                                                                                                                | Bordin S.; Flemmig T.F.; Verardi S.                                                                                                                  | 2009 |
| Evaluation of peri-implant tissue response according to the presence of keratinized mucosa                                                                                         | Kim B.-S.; Kim Y.-K.; Yun P.-Y.; Yi Y.-J.; Lee H.-J.; Kim S.-G.; Son J.-S.                                                                           | 2009 |
| Subcrestal placement of two-part implants                                                                                                                                          | Welander M.; Abrahamsson I.; Berglundh T.                                                                                                            | 2009 |
| Influence of defect depth on resonance frequency analysis and insertion torque values for implants placed in fresh extraction sockets: A human cadaver study                       | Turkyilmaz I.; Sennerby L.; Yilmaz B.; Bilecenoglu B.; Ozbek E.N.                                                                                    | 2009 |

|                                                                                                                                                                                                                                                                                                           |                                                                                                                                                                         |      |
|-----------------------------------------------------------------------------------------------------------------------------------------------------------------------------------------------------------------------------------------------------------------------------------------------------------|-------------------------------------------------------------------------------------------------------------------------------------------------------------------------|------|
| Interforaminal implant therapy using a split skin graft--treatment outcome after 13 years.                                                                                                                                                                                                                | Karl M.; Fenner M.; Amann K.; Heckmann J.G.; Wichmann M.G.; Heckmann S.M.                                                                                               | 2009 |
| Bivalirudin and Clopidogrel With and Without Eptifibatide for Elective Stenting: Effects on Platelet Function, Thrombelastographic Indexes, and Their Relation to Periprocedural Infarction. Results of the CLEAR PLATELETS-2 (Clopidogrel With Eptifibatide to Arrest the Reactivity of Platelets) Study | Gurbel P.A.; Bliden K.P.; Saucedo J.F.; Suarez T.A.; DiChiara J.; Antonino M.J.; Mahla E.; Singla A.; Herzog W.R.; Bassi A.K.; Hennebry T.A.; Gesheff T.B.; Tantry U.S. | 2009 |
| Eradication of multidrug-resistant <i>Acinetobacter baumannii</i> in a female patient with total hip arthroplasty, with debridement and retention: A case report                                                                                                                                          | Beiler A.M.; Belknap R.W.; Dayton M.R.; Price C.S.; Morgan S.J.                                                                                                         | 2009 |
| Biomaterial and antibiotic strategies for peri-implantitis                                                                                                                                                                                                                                                | Norowski Jr. P.A.; Bumgardner J.D.                                                                                                                                      | 2009 |
| Peri-implantitis in partially edentulous patients: Association with inadequate plaque control                                                                                                                                                                                                             | Serino G.; Ström C.                                                                                                                                                     | 2009 |
| Changes in inflammatory mediators in peri-implant fluid after implant insertion                                                                                                                                                                                                                           | Venza M.; Visalli M.; Lo Giudice G.; Ciccù M.; Passi P.; Teti D.                                                                                                        | 2009 |
| A 12-month evaluation of nitrite oxide metabolism around immediate and conventionally loaded dental implants                                                                                                                                                                                              | Güncü G.N.; Tözüm T.F.; Güncü M.B.; Yamalik N.; Tümer C.                                                                                                                | 2009 |
| Theoretical knowledge in implant dentistry for undergraduate students.                                                                                                                                                                                                                                    | Hicklin S.P.; Albrektsson T.; Hämmerle C.H.                                                                                                                             | 2009 |
| The rationale for the introduction of implant dentistry into the dental curriculum.                                                                                                                                                                                                                       | Lang N.P.; De Bruyn H.                                                                                                                                                  | 2009 |
| Long-term effects of magnetron-sputtered calcium phosphate coating on osseointegration of dental implants in non-human primates                                                                                                                                                                           | Alexander F.; Christian U.; Stefan T.; Christoph V.; Reinhard G.; Georg W.                                                                                              | 2009 |
| Presentation and outcomes after percutaneous intervention for acute myocardial infarction in the NLHBI Dynamic Registry: Saphenous vein grafts versus native coronary arteries                                                                                                                            | Iqbal S.N.; Selzer F.; Naidu S.S.; Doucet S.; Faxon D.; Jacobs A.; Slater J.                                                                                            | 2009 |
| Coronary revascularization approaches combining total endoscopic bypass grafting and percutaneous interventions using different timing protocols                                                                                                                                                          | Friedrich G.J.; Bonaros N.; Schachner T.; Laufer G.; Pachinger O.; Bonatti J.O.                                                                                         | 2009 |
| Bleeding on probing and pocket probing depth in relation to probing pressure and mucosal health around oral implants                                                                                                                                                                                      | Gerber J.A.; Tan W.C.; Balmer T.E.; Salvi G.E.; Lang N.P.                                                                                                               | 2009 |
| Morphogenesis of the peri-implant mucosa: a comparison between flap and flapless procedures in the canine mandible                                                                                                                                                                                        | You T.-M.; Choi B.-H.; Li J.; Xuan F.; Jeong S.-M.; Jang S.-O.                                                                                                          | 2009 |
| 360° peri-implant, keratinised, soft-tissue grafting with stereolithographic-aided dressing plate                                                                                                                                                                                                         | Kwasnicki A.; Butterworth C.                                                                                                                                            | 2009 |
| Inflammatory Implant Periapical Lesion: Etiology, Diagnosis, and Treatment-Presentation of 7 Cases                                                                                                                                                                                                        | Peñarrocha-Diago M.; Boronat-Lopez A.; García-Mira B.                                                                                                                   | 2009 |
| Outcome evaluation of early placed maxillary anterior single-tooth implants using objective esthetic criteria: A cross-sectional, retrospective study in 45 patients with a 2- to 4-year follow-up using pink and white esthetic scores                                                                   | Belser U.C.; Grütter L.; Vailati F.; Bornstein M.M.; Weber H.-P.; Buser D.                                                                                              | 2009 |
| Early implant placement with simultaneous guided bone regeneration following single-tooth extraction in the esthetic zone: 12-Month results of a prospective study with 20 consecutive patients                                                                                                           | Buser D.; Halbritter S.; Hart C.; Bornstein M.M.; Grütter L.; Chappuis V.; Belser U.C.                                                                                  | 2009 |
| Zygoma implants for midfacial prosthetic rehabilitation using telescopes: 9-year follow-up.                                                                                                                                                                                                               | Landes C.A.; Paffrath C.; Koehler C.; Thai V.D.; Stübinger S.; Sader R.; Lauer H.C.; Piwowarczyk A.                                                                     | 2009 |
| An analysis of the effect of a vent hole on excess cement expressed at the crown-abutment margin for cement-retained implant crowns                                                                                                                                                                       | Patel D.; Invest J.C.F.; Tredwin C.J.; Setchell D.J.; Moles D.R.                                                                                                        | 2009 |
| Success rate of second-generation palatal implants                                                                                                                                                                                                                                                        | Jung B.A.; Kunkel M.; Göllner P.; Liechti T.; Wehrbein H.                                                                                                               | 2009 |
| Side-branch occlusion with XIENCE V everolimus-eluting and TAXUS EXPRESS2 paclitaxel-eluting stents: 2-year results from the SPIRIT III randomized trial                                                                                                                                                  | Lansky A.; Applegate R.; Hermiller J.B.; Cristea E.; Dressler O.; Sudhir K.; Doostzadeh J.; Su X.; Koo K.; Stone G.                                                     | 2009 |
| A new short uncemented, proximally fixed anatomic femoral implant with a prominent lateral flare: Design rationals and study design of an international clinical trial                                                                                                                                    | Renkawitz T.; Santori F.S.; Grifka J.; Valverde C.; Morlock M.M.; Learmonth I.D.                                                                                        | 2008 |
| Possible impact of inflammatory status on C-telopeptide pyridinoline cross-links of Type I collagen and osteocalcin levels around oral implants with peri-implantitis: A controlled clinical trial                                                                                                        | Tümer C.; Aksoy Y.; Güncü G.N.; Nohutcu R.M.; Kilinc K.; Tözüm T.F.                                                                                                     | 2008 |
| Single-tooth Morse taper connection implants after 1 year of functional loading: a multicentre study on 302 patients.                                                                                                                                                                                     | Mangano C.; Mangano F.; Piatelli A.; Lezzi G.; Mangano A.; La Colla L.; Mangano A.                                                                                      | 2008 |
| Osteoradionecrosis and dental implants                                                                                                                                                                                                                                                                    | Ben Slama L.; Hasni W.; De Labrouhe C.; Bado F.; Bertrand J.-C.                                                                                                         | 2008 |
| Implant treatment of patients with edentulous jaws: A 20-year follow-up                                                                                                                                                                                                                                   | Åstrand P.; Ahlqvist J.; Gunne J.; Nilson H.                                                                                                                            | 2008 |
| Effect of compromised cortical bone on implant load distribution                                                                                                                                                                                                                                          | Akça K.; Fanuscu M.I.; Caputo A.A.                                                                                                                                      | 2008 |
| Peri-implantitis                                                                                                                                                                                                                                                                                          | Vervaeke S.; De Bruyn H.                                                                                                                                                | 2008 |
| Long-term marginal bone loss around single dental implants affected by current and past smoking habits                                                                                                                                                                                                    | Levin L.; Hertzberg R.; Har-Nes S.; Schwartz-Arad D.                                                                                                                    | 2008 |
| Flap vs. flapless surgical techniques at immediate implant function in predominantly soft bone for rehabilitation of partial edentulism: a prospective cohort study with follow-up of 1 year.                                                                                                             | Maló P.; Nobre M.                                                                                                                                                       | 2008 |
| Reproducibility of the pink esthetic score - Rating soft tissue esthetics around single-implant restorations with regard to dental observer specialization                                                                                                                                                | Gehrke P.; Lobert M.; Dhom G.                                                                                                                                           | 2008 |

|                                                                                                                                                                                                               |                                                                                                                                                   |      |
|---------------------------------------------------------------------------------------------------------------------------------------------------------------------------------------------------------------|---------------------------------------------------------------------------------------------------------------------------------------------------|------|
| Immediate versus early loading of 7-mm-long flapless-placed single implants: a split-mouth randomised controlled clinical trial.                                                                              | Cannizzaro G.; Leone M.; Torchio C.; Viola P.; Esposito M.                                                                                        | 2008 |
| Halitosis: a review of associated factors and therapeutic approach.                                                                                                                                           | Cortelli J.R.; Barbosa M.D.; Westphal M.A.                                                                                                        | 2008 |
| Pulsed electromagnetic fields as adjuvant therapy in bone healing and peri-implant bone formation: an experimental study in rats.                                                                             | Grana D.R.; Marcos H.J.; Kokubu G.A.                                                                                                              | 2008 |
| Can gender differences be evaluated in a rhesus macaque (macaca mulatto) model of focal cerebral ischemia?                                                                                                    | Murphy S.J.; Kirsch J.R.; Zhang W.; Grafe M.R.; West G.A.; Del Zoppo G.J.; Traystman R.J.; Hurn P.D.                                              | 2008 |
| The internal medicine specialist and the preoperative risk evaluation and management                                                                                                                          | Fontana M.G.; Capitelli M.; Cioni G.                                                                                                              | 2008 |
| Sandblasted/acid-etched vs smooth-surface implants: implant clinical reaction to experimentally induced peri-implantitis in Beagle dogs.                                                                      | Martines R.T.; Sendyk W.R.; Gromatzky A.; Cury P.R.                                                                                               | 2008 |
| Soft tissue preservation and crestal bone loss around single-tooth implants.                                                                                                                                  | Sunitha R.V.; Ramakrishnan T.; Kumar S.; Emmadi P.                                                                                                | 2008 |
| Conventional and early loading of two-implant supported mandibular overdentures. A systematic review.                                                                                                         | Rutkunas V.; Mizutani H.; Puriene A.                                                                                                              | 2008 |
| Dental implant-related infections                                                                                                                                                                             | López-Cerero L.                                                                                                                                   | 2008 |
| Osteogenesis distraction and platelet-rich plasma: Combined use in restoration of severe atrophic mandible. Long-term results                                                                                 | Robiony M.; Zorzan E.; Polini F.; Sembronio S.; Toro C.; Politi M.                                                                                | 2008 |
| The effect of thick mucosa on peri-implant tissues: An experimental study in dogs                                                                                                                             | Jeong S.-M.; Choi B.-H.; Li J.; Xuan F.                                                                                                           | 2008 |
| Injectable calcium phosphate cement as a bone-graft material around peri-implant dehiscence defects: a dog study.                                                                                             | Arisan V.; Ozdemir T.; Anil A.; Jansen J.A.; Ozer K.                                                                                              | 2008 |
| Alveolar ridge augmentation with titanium mesh and a combination of autogenous bone and anorganic bovine bone: A 2-year prospective study                                                                     | Pieri F.; Corinaldesi G.; Fini M.; Aldini N.N.; Giardino R.; Marchetti C.                                                                         | 2008 |
| Retrospective clinical evaluation of tapered screw-vent implants: results after up to eight years of clinical function.                                                                                       | Ormianer Z.; Palti A.                                                                                                                             | 2008 |
| Composition of supra- and subgingival biofilm of subjects with healthy and diseased implants                                                                                                                  | Shibli J.A.; Melo L.; Ferrari D.S.; Figueiredo L.C.; Faveri M.; Feres M.                                                                          | 2008 |
| Er,Cr:YSGG laser-assisted surgical treatment of peri-implantitis with 1-year reentry and 18-month follow-up                                                                                                   | Azzeh M.M.                                                                                                                                        | 2008 |
| Early wound healing following one-stage dental implant placement with and without antibiotic prophylaxis: A pilot study                                                                                       | Khouri S.B.; Thomas L.; Walters J.D.; Sheridan J.F.; Leblebicioglu B.                                                                             | 2008 |
| Clinical analysis of the soft tissue integration of non-submerged (ITI) and submerged (3i) implants: A prospective-controlled cohort study                                                                    | Garcia R.V.; Kraehenmann M.A.; Bezerra F.J.B.; Mendes C.M.C.; Rapp G.E.                                                                           | 2008 |
| Bone level changes at implants supporting crowns or fixed partial dentures with or without cantilevers                                                                                                        | Hälgl G.A.; Schmid J.; Hämmerle C.H.F.                                                                                                            | 2008 |
| Relationships between implant stability, image-based measures and nitric oxide levels                                                                                                                         | Güncü G.N.; Tözüm T.F.; Güncü M.B.; Yamalik N.                                                                                                    | 2008 |
| A clinical observation of therapeutic alliance of orthodontics and implant prosthodontics for dentition defect with malocclusion                                                                              | Zhou G.; Liu D.; Liang X.; Wang J.; Tang L.; Zhang N.                                                                                             | 2008 |
| Performance of dental implants after staged sinus floor elevation procedures: 5-year results of a prospective study in partially edentulous patients                                                          | Bornstein M.M.; Chappuis V.; Von Arx T.; Buser D.                                                                                                 | 2008 |
| Long-term results of mandibular reconstruction with autogenous bone grafts and oral implants after tumor resection                                                                                            | Chiapasco M.; Colletti G.; Romeo E.; Zaniboni M.; Brusati R.                                                                                      | 2008 |
| A modified approach for vestibuloplasty in severely resorbed mandible using an implant-retained postoperative stent: a case report                                                                            | Melo L.G.N.; Almeida A.L.P.F.; Lopes J.F.S.; Rezende M.L.R.; Neto J.S.M.; Ciporkin F.; Nagata M.J.H.                                              | 2008 |
| Locally delivered antimicrobials: clinical evidence and relevance.                                                                                                                                            | Paquette D.W.; Ryan M.E.; Wilder R.S.                                                                                                             | 2008 |
| Peri-implant diseases: Diagnosis and risk indicators                                                                                                                                                          | Heitz-Mayfield L.J.A.                                                                                                                             | 2008 |
| Peri-implant diseases: Consensus Report of the Sixth European Workshop on Periodontology                                                                                                                      | Lindhe J.; Meyle J.                                                                                                                               | 2008 |
| Microbiology and cytokine levels around healthy dental implants and teeth                                                                                                                                     | Nowzari H.; Botero J.E.; DeGiacomo M.; Villacres M.C.; Rich S.K.                                                                                  | 2008 |
| A systematic review of the success of sinus floor elevation and survival of implants inserted in combination with sinus floor elevation: Part I: Lateral approach                                             | Pjetursson B.E.; Tan W.C.; Zwahlen M.; Lang N.P.                                                                                                  | 2008 |
| The safety and acceptability of an electric toothbrush on peri-implant mucosa in patients with oral implants in aesthetic areas: a prospective cohort study.                                                  | Rasperini G.; Pellegrini G.; Cortella A.; Rocchietta I.; Consonni D.; Simion M.                                                                   | 2008 |
| Surgical treatment of peri-implantitis                                                                                                                                                                        | Claffey N.; Clarke E.; Polyzois I.; Renvert S.                                                                                                    | 2008 |
| Early implant placement with simultaneous guided bone regeneration following single-tooth extraction in the esthetic zone: A crosssectional, retrospective study in 45 subjects with a 2- to 4-year follow-up | Buser D.; Bornstein M.M.; Weber H.P.; Grutter L.; Schmid B.; Belser U.C.                                                                          | 2008 |
| Soft tissue management at implant sites                                                                                                                                                                       | Cairo F.; Pagliaro U.; Nieri M.                                                                                                                   | 2008 |
| A systematic review of the success of sinus floor elevation and survival of implants inserted in combination with sinus floor elevation Part II: Transalveolar technique                                      | Tan W.C.; Lang N.P.; Zwahlen M.; Pjetursson B.E.                                                                                                  | 2008 |
| Light-microscopic evaluation of the dimensions of peri-implant mucosa around immediately loaded and submerged titanium implants in monkeys                                                                    | Quaranta A.; Piattelli A.; Scarano A.; Quaranta M.; Pompa G.; Iezzi G.                                                                            | 2008 |
| Carotid Stenting versus Carotid Endarterectomy: Evidence Basis and Cost Implications                                                                                                                          | Janssen M.P.; de Borst G.J.; Mali W.P.Th.M.; Kappelle L.J.; Moll F.L.; Ackerstaff R.G.A.; Rothwell P.M.; Brown M.M.; van Sambeek M.R.; Buskens E. | 2008 |



|                                                                                                                                                                                 |                                                                                                  |      |
|---------------------------------------------------------------------------------------------------------------------------------------------------------------------------------|--------------------------------------------------------------------------------------------------|------|
| The FG Syndromes (Online Mendelian Inheritance in Man 305450): Perspective in 2008                                                                                              | Opitz J.M.; Smith J.F.; Santoro L.                                                               | 2008 |
| Radiographic follow-up analysis of Brånemark dental implants.                                                                                                                   | Pikner S.S.                                                                                      | 2008 |
| Primary oral squamous cell carcinoma arising around dental osseointegrated implants mimicking peri-implantitis                                                                  | Valle A.E.D.; Llamas R.M.-C.; Vicente J.L.; Etzebarria A.U.; Urizar J.M.A.                       | 2008 |
| Evaluation of peri-implant bone loss around platform-switched implants                                                                                                          | Cappiello M.; Luongo R.; Di Iorio D.; Bugea C.; Cocchetto R.; Celletti R.                        | 2008 |
| Interventions for replacing missing teeth: Maintaining and recovering soft tissue health around dental implants                                                                 | Grusovin M.G.; Coulthard P.; Jourabchian E.; Worthington H.V.; Esposito M.A.B.                   | 2008 |
| Effect of ovariectomy and alendronate on implant osseointegration in rat maxillary bone.                                                                                        | Viera-Negrón Y.E.; Ruan W.H.; Winger J.N.; Hou X.; Sharawy M.M.; Borke J.L.                      | 2008 |
| Conventional and advanced implant treatment in the type II diabetic patient: Surgical protocol and long-term clinical results                                                   | Tawil G.; Younan R.; Azar P.; Sleilati G.                                                        | 2008 |
| Five-year prospective evaluation of mandibular overdentures retained by two microthreaded, TiOblast nonsplinted implants and retentive ball anchors                             | Cooper L.F.; Moriarty J.D.; Guckes A.D.; Klee L.B.; Smith R.G.; Almgren C.; Felton D.A.          | 2008 |
| Evaluation of the presence or absence of papilla between tooth and implant                                                                                                      | Kawai E.S.; Almeida A.L.P.F.                                                                     | 2008 |
| Early loading of mandibular full-arch bridges screw retained after 1 week to four to five Monotype® implants: 3-Year results from a prospective multicentre study               | Arvidson K.; Esselin O.; Felle-Persson E.; Jonsson G.; Smedberg J.-I.; Soderstrom U.             | 2008 |
| The influence of abutment angulation on micromotion level for immediately loaded dental implants: A 3-D finite element analysis                                                 | Kao H.-C.; Gung Y.-W.; Chung T.-F.; Hsu M.-L.                                                    | 2008 |
| Immediate functional loading of TiOblast dental implants in full-arch edentulous mandibles: A 3-year prospective study                                                          | De Bruyn H.; Van De Velde T.; Collaert B.                                                        | 2008 |
| Ridge alterations following immediate implant placement in the dog: Flap versus flapless surgery                                                                                | Blanco J.; Nuñez V.; Aracil L.; Muñoz F.; Ramos I.                                               | 2008 |
| Interventions for replacing missing teeth: Treatment of perimplantitis                                                                                                          | Esposito M.; Grusovin M.G.; Kakisis I.; Coulthard P.; Worthington H.V.                           | 2008 |
| Altered systemic serologic parameters in patients with silicone mammary implants                                                                                                | Wolfram D.; Oberreiter B.; Mayerl C.; Soelder E.; Ulmer H.; Piza-Katzer H.; Wick G.; Backovic A. | 2008 |
| Diagnosis and management of peri-implant diseases                                                                                                                               | Heitz-Mayfield L.J.A.                                                                            | 2008 |
| The efficacy of interventions to treat peri-implantitis: a Cochrane systematic review of randomised controlled clinical trials.                                                 | Esposito M.; Grusovin M.G.; Coulthard P.; Worthington H.V.                                       | 2008 |
| Biological basis for soft tissue management in implant dentistry                                                                                                                | Yeung S.C.H.                                                                                     | 2008 |
| Evaluation of soft-tissue alteration around implant-supported single-tooth restoration in the anterior maxilla: The pink esthetic score                                         | Lai H.-C.; Zhang Z.-Y.; Wang F.; Zhuang L.-F.; Liu X.; Pu Y.-P.                                  | 2008 |
| Immediate non-occlusal vs. early loading of dental implants in partially edentulous patients: A multicentre randomized clinical trial. Peri-implant bone and soft-tissue levels | Galli F.; Capelli M.; Zuffetti F.; Testori T.; Esposito M.                                       | 2008 |
| Hard tissue implant interface                                                                                                                                                   | Albrektsson T.                                                                                   | 2008 |
| The use of a linear oscillating device in periodontal treatment: A review                                                                                                       | Guentsch A.; Preshaw P.M.                                                                        | 2008 |
| Immediate versus early loading of flapless-placed implants supporting maxillary full-arch prostheses: a randomised controlled clinical trial.                                   | Cannizzaro G.; Torchio C.; Leone M.; Esposito M.                                                 | 2008 |
| Implant placement in fresh extraction sockets and simultaneous osteotome sinus floor elevation: A case series                                                                   | Barone A.; Cornellini R.; Ciaglia R.; Covani U.                                                  | 2008 |
| Regenerative therapy of deep peri-implant Infrabony defects after CO 2 laser implant surface decontamination                                                                    | Romanos G.E.; Nentwig G.H.                                                                       | 2008 |
| Lung transplantation and cystic fibrosis                                                                                                                                        | Spencer H.; Aurora P.                                                                            | 2008 |
| Rehabilitation of atrophic maxilla: A review of 101 zygomatic implants                                                                                                          | Urgell J.P.; Gutiérrez V.R.; Escoda C.G.                                                         | 2008 |
| Histologic analysis of human peri-implant bone in type 1 osteoporosis.                                                                                                          | Shibli J.A.; Aguiar K.C.; Melo L.; Ferrari D.S.; D'Avila S.; Iezzi G.; Piattelli A.              | 2008 |
| An alternative method to treat a case with severe maxillary atrophy by the use of angled implants instead of complicated augmentation procedures: a case report.                | Bilhan H.                                                                                        | 2008 |
| Systematic review of implant outcomes in treated periodontitis subjects                                                                                                         | Ong C.T.T.; Ivanovski S.; Needleman I.G.; Retzepi M.; Moles D.R.; Tonetti M.S.; Donos N.         | 2008 |
| Influence of amine fluoride/stannous fluoride mouthwashes with and without chlorhexidine on secretion of proinflammatory molecules by peri-implant crevicular fluid cells.      | Di Carlo F.; Quaranta A.; Di Alberti L.; Ronconi L.F.; Quaranta M.; Piattelli A.                 | 2008 |
| A 5-year prospective multicenter study on 1-stage smooth-surface brånemark system implants with early loading in edentulous mandibles                                           | Friberg B.; Raghoobar G.M.; Grunert I.; Hobkirk J.A.; Tepper G.                                  | 2008 |
| Immediate loading in the fully edentulous maxilla without bone grafting: the V-II-V technique.                                                                                  | Agliardi E.L.; Francetti L.; Romeo D.; Taschieri S.; Del Fabbro M.                               | 2008 |
| Influence of abutment material on stability of peri-implant tissues: A systematic review                                                                                        | Linkevicius T.; Apse P.                                                                          | 2008 |
| Immediate loading using cross-arch fixed restorations in heavy smokers: Nine consecutive case reports for edentulous arches                                                     | Romanos G.E.; Nentwig G.-H.                                                                      | 2008 |
| Simultaneous flapless implant placement and peri-implant defect correction: An experimental pilot study in dogs                                                                 | Jeong S.-M.; Choi B.-H.; Li J.; Xuan F.                                                          | 2008 |
| The treatment of peri-mucositis and peri-implantitis 1.                                                                                                                         | Otto M.; Gluckman H.                                                                             | 2008 |

|                                                                                                                                                                                                                    |                                                                                                                      |      |
|--------------------------------------------------------------------------------------------------------------------------------------------------------------------------------------------------------------------|----------------------------------------------------------------------------------------------------------------------|------|
| Soft tissue dehiscence coverage around endosseous implants: A prospective cohort study                                                                                                                             | Burkhardt R.; Joss A.; Lang N.P.                                                                                     | 2008 |
| Implant-retained auricular prostheses: An assessment of implant success and prosthetic complications                                                                                                               | Aydin C.; Karakoca S.; Yilmaz H.; Yilmaz C.                                                                          | 2008 |
| Costosternal chondrodynia simulating recurrent breast cancer unveiled by FDG PET                                                                                                                                   | Mathew A.S.; El-Haddad G.; Lilien D.L.; Takalkar A.M.                                                                | 2008 |
| Biomechanical strength of the Peri-Loc® proximal tibial plate: A comparison of all-locked versus hybrid locked/nonlocked screw configurations                                                                      | Estes C.; Rhee P.; Shrader M.W.; Csavina K.; Jacofsky M.C.; Jacofsky D.J.                                            | 2008 |
| Paresthesia of the mental nerve stem from periapical infection of mandibular canine tooth: a case report                                                                                                           | Ozkan B.T.; Celik S.; Durmus E.                                                                                      | 2008 |
| Quantitative computed tomography bone mineral density measurements in irradiated and non-irradiated minipig alveolar bone: An experimental study                                                                   | Verdonck H.W.D.; Meijer G.J.; Nieman F.H.; Stoll C.; Riediger D.; De Baat C.                                         | 2008 |
| Intra-arterial thrombolysis of acute iatrogenic intracranial arterial occlusion attributable to neuroendovascular procedures or coronary angiography.                                                              | Arnold M.; Fischer U.; Schroth G.; Nedeltchev K.; Isenegger J.; Remonda L.; Windecker S.; Brekenfeld C.; Mattle H.P. | 2008 |
| In-patient comparison of immediate and conventional loaded implants in mandibular molar sites within 12 months                                                                                                     | Güncü M.B.; Aslan Y.; Tümer C.; Güncü G.N.; Uysal S.                                                                 | 2008 |
| The dimensions of keratinized mucosa around implants affect clinical and immunological parameters                                                                                                                  | Zigdon H.; MacHtei E.E.                                                                                              | 2008 |
| Bone level alterations at implants placed in the posterior segments of the dentition: Outcome of submerged/non-submerged healing. A 5-year multicenter, randomized, controlled clinical trial                      | Cecchinato D.; Bengazi F.; Blasi G.; Botticelli D.; Cardarelli I.; Gualini F.                                        | 2008 |
| Treatment of extracranial carotid artery pseudoaneurysms with stent grafts: Case series                                                                                                                            | Gupta R.; Thomas A.J.; Masih A.; Horowitz M.B.                                                                       | 2008 |
| Human histologic evaluation of a six-year-old threaded implant retrieved from a subject with osteoporosis.                                                                                                         | de Melo L.; Piattelli A.; Lezzi G.; d'Avila S.; Zenóbio E.G.; Shibli J.A.                                            | 2008 |
| Outcome of dental implants in partially edentulous patients with and without a history of periodontitis: a 5-year interim analysis of a cohort study.                                                              | Gatti C.; Gatti F.; Chiapasco M.; Esposito M.                                                                        | 2008 |
| Maintaining and recovering soft tissue health around dental implants: a Cochrane systematic review of randomised controlled clinical trials.                                                                       | Grusovin M.G.; Coulthard P.; Worthington H.V.; Esposito M.                                                           | 2008 |
| Width of keratinized gingiva and the health status of the supporting tissues around dental implants                                                                                                                | Bouri Jr. A.; Bissada N.; Al-Zahrani M.S.; Faddoul F.; Nouneh I.                                                     | 2008 |
| One-year bacterial colonization patterns of Staphylococcus aureus and other bacteria at implants and adjacent teeth                                                                                                | Salvi G.E.; Fürst M.M.; Lang N.P.; Persson G.R.                                                                      | 2008 |
| A 10-year prospective clinical and radiographic study of one-stage dental implants                                                                                                                                 | Kim D.M.; Badovinac R.L.; Lorenz R.L.; Fiorellini J.P.; Weber H.P.                                                   | 2008 |
| Success rates of microimplants in edentulous patients with residual ridge resorption                                                                                                                               | Morneburg T.R.; Pröschel P.A.                                                                                        | 2008 |
| Implant-supported maxillary overdentures retained with milled bars: Maxillary anterior versus maxillary posterior concept - A retrospective study                                                                  | Krennmair G.; Krainhöfner M.; Piehslinger E.                                                                         | 2008 |
| A systematic review of the 5-year survival and complication rates of implant-supported single crowns                                                                                                               | Jung R.E.; Pjetursson B.E.; Glauser R.; Zembic A.; Zwahlen M.; Lang N.P.                                             | 2008 |
| Early loading of sandblasted and acid-etched implants: A randomized-controlled double-blind split-mouth study. Five-year results                                                                                   | Rocuzzo M.; Aglietta M.; Bunino M.; Bonino L.                                                                        | 2008 |
| Re-osseointegration on rough implant surfaces previously coated with bacterial biofilm: An experimental study in the dog                                                                                           | Alhag M.; Renvert S.; Polyzois I.; Claffey N.                                                                        | 2008 |
| Peri-implant tissue and radiographic bone levels in the immediately restored single-tooth implant: A retrospective analysis                                                                                        | Degidi M.; Nardi D.; Piattelli A.                                                                                    | 2008 |
| Analysis of the possibility of the relationship between various implant-related measures: An 18-month follow-up study                                                                                              | Tözüm T.F.; Turkyilmaz I.; Yamalik N.; Karabulut E.; Turkyilmaz A.S.; Eratalay K.                                    | 2008 |
| Bone healing dynamics at buccal peri-implant sites                                                                                                                                                                 | Qahash M.; Susin C.; Polimeni G.; Hall J.; Wikesjö U.M.E.                                                            | 2008 |
| Roles of bone scintigraphy and resonance frequency analysis in evaluating osseointegration of endosseous implant                                                                                                   | Zhou Y.; Jiang T.; Qian M.; Zhang X.; Wang J.; Shi B.; Xia H.; Cheng X.; Wang Y.                                     | 2008 |
| Similar cost for elective open and endovascular AAA repair in a population-based setting                                                                                                                           | Mani K.; Björck M.; Lundkvist J.; Wanhainen A.                                                                       | 2008 |
| Implant treatment in periodontitis-susceptible patients: A systematic review                                                                                                                                       | Schou S.                                                                                                             | 2008 |
| Two-year clinical results following treatment of peri-implantitis lesions using a nanocrystalline hydroxyapatite or a natural bone mineral in combination with a collagen membrane                                 | Schwarz F.; Sculean A.; Bieling K.; Ferrari D.; Rothamel D.; Becker J.                                               | 2008 |
| The impact of prosthetic design on the stability, marginal bone loss, peri-implant sulcus fluid volume, and nitric oxide metabolism of conventionally loaded endosseous dental implants: A 12-month clinical study | Tözüm T.F.; Qüncü Q.N.; Yamalik N.; Turkyilmaz I.; Baris Güncü M.                                                    | 2008 |
| Immediate maxillary lateral incisor implants with nonocclusal loading provisional crowns                                                                                                                           | Penarrocha M.; Lamas J.; Penarrocha M.; Garcia B.                                                                    | 2008 |
| Prosthetic rehabilitation of oral function in head-neck cancer patients with dental implants placed simultaneously during ablative tumour surgery: an assessment of treatment outcomes and quality of life         | Schoen P.J.; Raghoobar G.M.; Bouma J.; Reintsema H.; Burlage F.R.; Roodenburg J.L.N.; Vissink A.                     | 2008 |
| Evaluation of human bone around a dental implant retrieved from a subject with osteoporosis                                                                                                                        | Shibli J.A.; Grande P.A.; D'Avila S.; Iezzi G.; Piattelli A.                                                         | 2008 |
| Correlation between early perforation of cover screws and marginal bone loss: A retrospective study                                                                                                                | Van Assche N.; Collaert B.; Coucke W.; Quirynen M.                                                                   | 2008 |

|                                                                                                                                                                                                                    |                                                                                                            |      |
|--------------------------------------------------------------------------------------------------------------------------------------------------------------------------------------------------------------------|------------------------------------------------------------------------------------------------------------|------|
| Asepsis during periodontal surgery involving oral implants and the usefulness of peri-operative antibiotics: A prospective, randomized, controlled clinical trial                                                  | Abu-Ta'a M.; Quirynen M.; Teughels W.; Van Steenberghe D.                                                  | 2008 |
| Peri-implant bone loss caused by occlusal overload: Repair of the peri-implant defect following correction of the traumatic occlusion. A case report                                                               | Tawil G.                                                                                                   | 2008 |
| Sonography of periimplant buccal bone defects in periodontitis patients: A pilot study                                                                                                                             | Bertram S.; Emshoff R.                                                                                     | 2008 |
| Complications and short-term results of two different transobturator techniques for surgical treatment of women with urinary incontinence: A randomized study                                                      | But I.; Faganelj M.                                                                                        | 2008 |
| Mycobacterium fortuitum infection following total knee arthroplasty: A case report and literature review                                                                                                           | Cheung I.; Wilson A.                                                                                       | 2008 |
| Reliability of findings around healthy implants in association with oral hygiene measures: A clinical, microbiological, and immunological follow-up in edentulous patients                                         | Lachmann S.; Kimmerle-Müller E.; Axmann D.; Gomez-Roman G.; Weber H.; Haas R.                              | 2007 |
| A comprehensive and critical review of dental implant prognosis in periodontally compromised partially edentulous patients: Review                                                                                 | Karoussis I.K.; Kotsovilis S.; Fourmousis I.                                                               | 2007 |
| Clinical and radiographic evaluation of periodontal and peri-implant conditions in patients with implant-supported prosthesis.                                                                                     | Abreu M.H.; Bianchini M.A.; Magini R.S.; Rösing C.K.                                                       | 2007 |
| Resolution of an active peri-implantitis in a chronic steroid user by bone augmentation with PepGen P-15 and a barrier membrane.                                                                                   | Lu S.Y.; Huang C.C.                                                                                        | 2007 |
| Failing factors associated with osseointegrated dental implant loss                                                                                                                                                | Montes C.C.; Pereira F.A.; Thomé G.; Alves E.D.M.; Acedo R.V.; De Souza J.R.; Melo A.C.M.; Trevilatto P.C. | 2007 |
| A 10-year prospective study of ITI dental implants placed in the posterior region. I: Clinical and radiographic results                                                                                            | Blanes R.J.; Bernard J.P.; Blanes Z.M.; Belser U.C.                                                        | 2007 |
| Osseointegrated implants in subjects treated for generalized aggressive periodontitis: 10-Year results of a prospective, long-term cohort study                                                                    | Mengel R.; Behle M.; Flores-de-Jacoby L.                                                                   | 2007 |
| Managing Complications after Midurethral Sling for Stress Urinary Incontinence                                                                                                                                     | Costantini E.; Lazzeri M.; Porena M.                                                                       | 2007 |
| Experimental evaluation of tooth movement in the beagle dog with the mini-screw implant for orthodontic anchorage                                                                                                  | Owens S.E.; Buschang P.H.; Cope J.B.; Franco P.F.; Rossouw P.E.                                            | 2007 |
| Implant Placement Immediately After the Lateral Approach of the Trap Door Window Procedure to Create a Maxillary Sinus Lift Without Bone Grafting: A 2-Year Retrospective Evaluation of 47 Implants in 33 Patients | Chen T.-W.; Chang H.-S.; Leung K.-W.; Lai Y.-L.; Kao S.-Y.                                                 | 2007 |
| Preservation of peri-implant soft and hard tissues using platform switching of implants placed in immediate extraction sockets: A proof-of-concept study with 12- to 36-month follow-up                            | Canullo L.; Rasperini G.                                                                                   | 2007 |
| Dental implants as strategic supplementary abutments for implant-tooth-supported telescopic crown-retained maxillary dentures: A retrospective follow-up study for up to 9 years                                   | Krennmair G.; Krainhöfner M.; Waldenberger O.; Piehslinger E.                                              | 2007 |
| Implant-supported mandibular overdentures retained with a milled bar: A retrospective study                                                                                                                        | Krennmair G.; Krainhöfner M.; Piehslinger E.                                                               | 2007 |
| Interleukin 1beta levels around microscrew implants during orthodontic tooth movement.                                                                                                                             | Sari E.; Uçar C.                                                                                           | 2007 |
| Laser applications in oral surgery and implant dentistry                                                                                                                                                           | Deppe H.; Horch H.-H.                                                                                      | 2007 |
| Efficacy and economics of postoperative blood salvage in patients undergoing elective total hip replacement                                                                                                        | Mirza S.B.; Campion J.; Dixon J.H.; Panesar S.S.                                                           | 2007 |
| A review of the aetiology and management of fractured dental implants and a case report                                                                                                                            | Virdee P.; Bishop K.                                                                                       | 2007 |
| Long time follow up of implant therapy and treatment of peri-implantitis.                                                                                                                                          | Roos-Jansäker A.M.                                                                                         | 2007 |
| Effects of smoking on the outcome of implant treatment: A literature review                                                                                                                                        | Baig M.R.; Rajan M.                                                                                        | 2007 |
| Early soft tissue healing around one-stage dental implants: Clinical and microbiologic parameters                                                                                                                  | DeAngelo S.J.; Kumar P.S.; Beck F.M.; Tatakis D.N.; Leblebicioglu B.                                       | 2007 |
| Implant supported prostheses with Bone System implant system: a retrospective study with follow-up period up to 13-years about 1021 fixtures.                                                                      | Carbone M.; Goss E.; Borione M.; Bava L.; Broccoletti R.; Carrozzo M.; Gandolfo S.                         | 2007 |
| A 5-year follow-up study on one-stage implants inserted concomitantly with localized alveolar ridge augmentation                                                                                                   | Juodzbals G.; Raustia A.M.; Kubilius R.                                                                    | 2007 |
| Bone level changes at axial- and non-axial-positioned implants supporting fixed partial dentures. A 5-year retrospective longitudinal study                                                                        | Koutouzis T.; Wennström J.L.                                                                               | 2007 |
| Deleterious effects of dihydrotestosterone on cerebral ischemic injury                                                                                                                                             | Cheng J.; Alkayed N.J.; Hurn P.D.                                                                          | 2007 |
| Schwann cell graft: A method to promote sensory responses of osseointegrated implants                                                                                                                              | Yuan Q.; Gong P.; Tan Z.                                                                                   | 2007 |
| Er:YAG laser therapy for peri-implant infection: A histological study                                                                                                                                              | Takasaki A.A.; Aoki A.; Mizutani K.; Kikuchi S.; Oda S.; Ishikawa I.                                       | 2007 |
| Impact of supportive periodontal therapy and implant surface roughness on implant outcome in patients with a history of periodontitis                                                                              | Quirynen M.; Abarca M.; Van Assche N.; Nevins M.; Van Steenberghe D.                                       | 2007 |
| Immediate loading of two implants supporting a ball attachment-retained mandibular overdenture: A prospective clinical study                                                                                       | Marzola R.; Scotti R.; Fazi G.; Schincaglia G.P.                                                           | 2007 |
| Single-tooth implant reconstructions: esthetic factors influencing the decision between titanium and zirconia abutments in anterior regions.                                                                       | Sailer I.; Zembic A.; Jung R.E.; Hammerle C.H.; Mattioli A.                                                | 2007 |

|                                                                                                                                                                         |                                                                                                                 |      |
|-------------------------------------------------------------------------------------------------------------------------------------------------------------------------|-----------------------------------------------------------------------------------------------------------------|------|
| Dental implant design and oral and systemic health.                                                                                                                     | Callan D.P.                                                                                                     | 2007 |
| Analysis of the potential association of implant stability, laboratory, and image-based measures used to assess osteotomy sites: Early versus delayed loading           | Tözüm T.F.; Turkyilmaz I.; Yamalik N.; Karabulut E.; Eratalay K.                                                | 2007 |
| Effect of cortical bone thickness and implant placement torque on stability of orthodontic mini-implants                                                                | Motoyoshi M.; Yoshida T.; Ono A.; Shimizu N.                                                                    | 2007 |
| Two-piece implants with turned versus microtextured collars                                                                                                             | Cosyn J.; Sabzevar M.M.; De Wilden P.; De Rouck T.                                                              | 2007 |
| Biomaterial strategies to reduce implant-associated infections                                                                                                          | Qiu Y.; Zhang N.; An Y.H.; Wen X.                                                                               | 2007 |
| Clinical and radiological results after augmentation procedures - A prospective study                                                                                   | Schlegel K.A.; Karascholi T.; Fenner M.; Nkenke E.                                                              | 2007 |
| Anti-platelet and anti-thrombotic approaches in patients undergoing percutaneous coronary intervention                                                                  | Garg R.; Uretsky B.F.; Lev E.I.                                                                                 | 2007 |
| Infection at titanium implants with or without a clinical diagnosis of inflammation                                                                                     | Renvert S.; Roos-Jansäker A.-M.; Lindahl C.; Renvert H.; Rutger Persson G.                                      | 2007 |
| Submerged healing following surgical treatment of peri-implantitis: a case series                                                                                       | Roos-Jansäker A.-M.; Renvert H.; Lindahl C.; Renvert S.                                                         | 2007 |
| Infections in implantology: From prophylaxis to treatment                                                                                                               | Antolín A.B.; García M.T.P.; Nasimi A.                                                                          | 2007 |
| Survival and success rates of 3i implants in partially edentulous patients: Results of a prospective study with up to 84-months' follow-up                              | Knauf M.; Gerds T.; Mucbe R.; Strub J.R.                                                                        | 2007 |
| A 1- To 12-year clinical evaluation of 106 endosseous implants supporting fixed and removable prostheses                                                                | Aykent F.; Inan O.; Ozyesil A.G.; Alptekin N.O.                                                                 | 2007 |
| Autogenous onlay bone grafts vs. alveolar distraction osteogenesis for the correction of vertically deficient edentulous ridges: A 2-4-year prospective study on humans | Chiapasco M.; Zaniboni M.; Rimondini L.                                                                         | 2007 |
| Influence of low-level laser treatment on bone regeneration and osseointegration of dental implants following sinus augmentation: An experimental study on sheep        | Jakse N.; Payer M.; Tangl S.; Berghold A.; Kirmeier R.; Lorenzoni M.                                            | 2007 |
| Surgical treatment of peri-implantitis using a bone substitute with or without a resorbable membrane: A prospective cohort study                                        | Roos-Jansäker A.-M.; Renvert H.; Lindahl C.; Renvert S.                                                         | 2007 |
| Bone regeneration around implants in the canine mandible with cultured fibroblasts in polyglactin mesh                                                                  | Sparks M.S.; Kerns D.G.; Wilson T.G.; Hallmon W.W.; Spears R.; Haghighat N.                                     | 2007 |
| Effects of a cell adhesion molecule coating on the blasted surface of titanium implants on bone healing in the rabbit femur                                             | Park J.-W.; Lee S.-G.; Choi B.-J.; Suh J.-Y.                                                                    | 2007 |
| Influence of immediate implant loading on peri-implant soft tissue morphology in the edentulous maxilla                                                                 | Gallucci G.O.; Mavropoulos A.; Bernard J.-P.; Belser U.C.                                                       | 2007 |
| Biomolecular surface coating to enhance orthopaedic tissue healing and integration                                                                                      | Reyes C.D.; Petrie T.A.; Burns K.L.; Schwartz Z.; García A.J.                                                   | 2007 |
| Adjunctive local antibiotic therapy in the treatment of peri-implantitis II: Clinical and radiographic outcomes                                                         | Salvi G.E.; Persson G.R.; Heitz-Mayfield L.J.A.; Frei M.; Lang N.P.                                             | 2007 |
| Peri-implant bone regeneration with calcium sulfate: A light and transmission electron microscopy case report                                                           | Scarano A.; Orsini G.; Pecora G.; Iezzi G.; Perrotti V.; Piattelli A.                                           | 2007 |
| Factors influencing the preservation of the periimplant marginal bone                                                                                                   | Hermann F.; Lerner H.; Palti A.                                                                                 | 2007 |
| The effect on bone regeneration of a liposomal vector to deliver BMP-2 gene to bone grafts in peri-implant bone defects                                                 | Park J.; Lutz R.; Felszeghy E.; Wiltfang J.; Nkenke E.; Neukam F.W.; Schlegel K.A.                              | 2007 |
| Analysis of early biofilm formation on oral implants in man                                                                                                             | Heuer W.; Elter C.; Demling A.; Neumann A.; Suerbaum S.; Hannig M.; Heidenblut T.; Bach F.W.; Stiesch-Scholz M. | 2007 |
| Vertical crestal bone changes around implants placed into fresh extraction sockets                                                                                      | Covani U.; Cornolini R.; Barone A.                                                                              | 2007 |
| Biomolecular modification of implant surfaces                                                                                                                           | Morra M.                                                                                                        | 2007 |
| Maxillary sinus lift for single implant-supported restorations: A clinical study                                                                                        | Krennmair G.; Krainhöfner M.; Schmid-Schwab M.; Piehstlinger E.                                                 | 2007 |
| Two human hydroxyapatite-coated dental implants retrieved after a 14-year loading period: A histologic and histomorphometric case report                                | Iezzi G.; Scarano A.; Petrone G.; Piattelli A.                                                                  | 2007 |
| Long-Term Results of Jaw Reconstruction With Microsurgical Fibula Grafts and Dental Implants                                                                            | Gbara A.; Darwich K.; Li L.; Schmelzle R.; Blake F.                                                             | 2007 |
| Platelet-enriched fibrin glue and platelet-rich plasma in the repair of bone defects adjacent to titanium dental implants                                               | You T.-M.; Choi B.-H.; Zhu S.-J.; Jung J.-H.; Lee S.-H.; Huh J.-Y.; Lee H.-J.; Li J.                            | 2007 |
| Removable partial denture on osseointegrated implants and natural teeth                                                                                                 | Chang L.-C.; Wang J.-C.; Tasi C.-C.                                                                             | 2007 |
| Surgical laser use in implantology and endodontics                                                                                                                      | Parker S.                                                                                                       | 2007 |
| Comparison of naturally occurring and ligature-induced peri-implantitis bone defects in humans and dogs                                                                 | Schwarz F.; Hertel M.; Sager M.; Bieling K.; Sculean A.; Becker J.                                              | 2007 |
| Therapy of peri-implantitis with resective surgery. A 3-year clinical trial on rough screw-shaped oral implants. Part II: Radiographic outcome                          | Romeo E.; Lops D.; Chiapasco M.; Ghisolfi M.; Vogel G.                                                          | 2007 |
| Soft and hard tissue assessment of immediate implant placement: A case series                                                                                           | Juodzbals G.; Wang H.-L.                                                                                        | 2007 |
| Risks and complications of orthodontic miniscrews                                                                                                                       | Kravitz N.D.; Kusnoto B.                                                                                        | 2007 |
| Scanning electron microscopic analysis of diode laser-treated titanium implant surfaces                                                                                 | Castro G.L.; Gallas M.; Núñez I.R.; Borrajo J.L.L.; Álvarez J.C.; Varela L.G.                                   | 2007 |
| Clinical analysis of immediate implant and implant-supported complete denture for 12 patients with severe periodontitis                                                 | Geng W.; Su Y.C.; Zhang X.J.; Wu L.C.; Huang Q.; Jiang X.Y.                                                     | 2007 |

|                                                                                                                                                                                                     |                                                                                                |      |
|-----------------------------------------------------------------------------------------------------------------------------------------------------------------------------------------------------|------------------------------------------------------------------------------------------------|------|
| Rehabilitation of oral function in head and neck cancer patients after radiotherapy with implant-retained dentures: Effects of hyperbaric oxygen therapy                                            | Schoen P.J.; Raghoobar G.M.; Bouma J.; Reintsema H.; Vissink A.; Sterk W.; Roodenburg J.L.N.   | 2007 |
| The effect of platelet-rich plasma on bone healing around implants placed in bone defects treated with Bio-Oss: a pilot study in the dog tibia                                                      | You T.-M.; Choi B.-H.; Li J.; Jung J.-H.; Lee H.-J.; Lee S.-H.; Jeong S.-M.                    | 2007 |
| Impact of tobacco use on the periodontium--an update. Part 2: Clinical and radiographic changes in the periodontium and effects on periodontal and implant therapy                                  | Saxer U.P.; Walter C.; Bornstein M.M.; Klingler K.; Ramseier C.A.                              | 2007 |
| Inhibition of Porphyromonas gingivalis adherence on titanium surface grafted by poly(sodium styrene sulfonate)                                                                                      | Zhou J.; Pavon-Djavid G.; Anagnostou F.; Migonney V.                                           | 2007 |
| Analysis of stress and strain around orthodontically loaded implants: An animal study                                                                                                               | Cattaneo P.M.; Dalstra M.; Melsen B.                                                           | 2007 |
| Canal atresia: "Surgery or implantable hearing devices? The expert's question is revisited"                                                                                                         | Evans A.K.; Kazahaya K.                                                                        | 2007 |
| A patient-centered perspective on surgery avoidance for hip or knee arthritis: Lessons for the future                                                                                               | Ballantyne P.J.; Gignac M.A.M.; Hawker G.A.                                                    | 2007 |
| Characterization of the antioxidant profile of human saliva in peri-implant health and disease                                                                                                      | Liskmann S.; Vihalemm T.; Salum O.; Zilmer K.; Fischer K.; Zilmer M.                           | 2007 |
| Le Fort I osteotomy with interpositional bone grafts and delayed oral implants for the rehabilitation of extremely atrophied maxillae: A 1-9-year clinical follow-up study on humans                | Chiapasco M.; Brusati R.; Ronchi P.                                                            | 2007 |
| Peri-implant bone loss around posterior mandible dental implants placed after distraction osteogenesis: Preliminary findings                                                                        | Polo W.C.K.; de Araujo N.S.; Lima Y.B.O.; Joly J.C.; Sendyk W.R.; Cury P.R.                    | 2007 |
| Three-year treatment outcomes with three brands of implants placed in the posterior maxilla and mandible of partially edentulous patients                                                           | Ozkan Y.; Ozcan M.; Akoglu B.; Ucakale M.; Kulak-Ozkan Y.                                      | 2007 |
| Diagnostic accuracy of in vitro panoramic radiographs depending on the exposure                                                                                                                     | Kaepler G.; Dietz K.; Reinert S.                                                               | 2007 |
| A comparison of implant-supported, bar- Or ball-retained mandibular overdentures: A retrospective clinical, microbiologic, and immunologic study of 10 edentulous patients attending a recall visit | Lachmann S.; Kimmerle-Müller E.; Gehring K.; Axmann D.; Gomez-Roman G.; Watzek G.; Weber H.    | 2007 |
| Factors affecting late implant bone loss: A retrospective analysis                                                                                                                                  | Chung D.M.; Oh T.-J.; Lee J.; Misch C.E.; Wang H.-L.                                           | 2007 |
| Immediate functional loading of implants placed with flapless surgery in the edentulous maxilla: 1-Year follow-up of a single cohort study                                                          | Cannizzaro G.; Leone M.; Esposito M.                                                           | 2007 |
| Treatment of experimental peri-implantitis using autogenous bone grafts and platelet-enriched fibrin glue in dogs                                                                                   | You T.-M.; Choi B.-H.; Zhu S.-J.; Jung J.-H.; Lee S.-H.; Huh J.-Y.; Lee H.-J.; Li J.           | 2007 |
| Conventional versus CO2 laser-assisted treatment of peri-implant defects with the concomitant use of pure-phase beta-tricalcium phosphate: a 5-year clinical report.                                | Deppe H.; Horch H.H.; Neff A.                                                                  | 2007 |
| The effect of delayed versus early loading on nitric oxide metabolism around dental implants: An 18-month comparative follow-up study                                                               | Tözüm T.F.; Türkyilmaz I.; Yamalik N.; Tümer C.; Kiliç A.; Kiliç K.; Karabulut E.; Eratalay K. | 2007 |
| Retrieval of blade implants with piezosurgery: two clinical cases.                                                                                                                                  | Sivolella S.; Berengo M.; Fiorot M.; Mazzuchin M.                                              | 2007 |
| Prevalence and risk variables for peri-implant disease in Brazilian subjects                                                                                                                        | Ferreira S.D.; Silva G.L.M.; Cortelli J.R.; Costa J.E.; Costa F.O.                             | 2006 |
| Re-osseointegration of peri-implantitis bone defects: an experimental study in dogs                                                                                                                 | Zou D.; Zhu H.; Qu X.                                                                          | 2006 |
| Neodymium:yttrium aluminum garnet laser irradiation with low pulse energy: A potential tool for the treatment of peri-implant disease                                                               | Giannini R.; Vassalli M.; Chellini F.; Polidori L.; Dei R.; Giannelli M.                       | 2006 |
| Radiological and clinical follow-up of machined- and anodized-surface implants after mean functional loading for 33 months                                                                          | Watzak G.; Zechner W.; Busenlechner D.; Arnhart C.; Gruber R.; Watzek G.                       | 2006 |
| Nonsurgical treatment of moderate and advanced periimplantitis lesions: A controlled clinical study                                                                                                 | Schwarz F.; Bieling K.; Bonsmann M.; Latz T.; Becker J.                                        | 2006 |
| Retrospective evaluation of mandibular incisor replacement with narrow neck implants                                                                                                                | Cordaro L.; Torsello F.; Mirisola Di Torresanto V.; Rossini C.                                 | 2006 |
| A 2-year clinical report of patients treated with two loading protocols for mandibular overdentures: Early versus conventional loading                                                              | Turkyilmaz I.; Tözüm T.F.; Tumer C.; Ozbek E.N.                                                | 2006 |
| Numerical simulation of in vivo intraosseous torsional failure of a hollow-screw oral implant.                                                                                                      | Cehreli M.; Akkocaoglu M.; Akca K.                                                             | 2006 |
| Probe penetration in periodontal and peri-implant tissues: An experimental study in the beagle dog                                                                                                  | Abrahamsson I.; Soldini C.                                                                     | 2006 |
| Effects of sinus membrane perforations on the success of dental implants placed in the augmented sinus                                                                                              | Karabuda C.; Arisan V.; Özyuvaci H.                                                            | 2006 |
| Bacterial plaque colonization around dental implant surfaces                                                                                                                                        | Covani U.; Marconcini S.; Crespi R.; Barone A.                                                 | 2006 |
| Long-term clinical evaluation of tapered multi-threaded implants: results and influences of potential risk factors.                                                                                 | Ormianer Z.; Palti A.                                                                          | 2006 |
| Five-year outcome of 111 immediate nonfunctional single restorations.                                                                                                                               | Degidi M.; Piattelli A.; Gehrke P.; Felice P.; Carinci F.                                      | 2006 |
| Increasing the width of keratinized mucosa around endosseous implant using acellular dermal matrix allograft                                                                                        | Park J.-B.                                                                                     | 2006 |
| Immediately loaded titanium implants with a porous anodized surface with at least 36 months of follow-up                                                                                            | Degidi M.; Perrotti V.; Piattelli A.                                                           | 2006 |
| A new era in periodontal and periimplant regeneration: use of growth-factor enhanced matrices incorporating rhPDGF.                                                                                 | Lynch S.E.; Wisner-Lynch L.; Nevins M.; Nevins M.L.                                            | 2006 |
| Role of physiotherapy in peri-operative management in total knee and hip surgery                                                                                                                    | Lenssen A.F.; de Bie R.A.                                                                      | 2006 |

|                                                                                                                                                                                                                              |                                                                                                                  |      |
|------------------------------------------------------------------------------------------------------------------------------------------------------------------------------------------------------------------------------|------------------------------------------------------------------------------------------------------------------|------|
| Syncrystallization: A technique for temporization of immediately loaded implants with metal-reinforced acrylic resin restorations                                                                                            | Degidi M.; Gehrke P.; Spanel A.; Piattelli A.                                                                    | 2006 |
| The effect of smoking on osseointegrated dental implants. Part II: Peri-implant bone loss                                                                                                                                    | DeLuca S.; Zarb G.                                                                                               | 2006 |
| Calprotectin and cross-linked N-terminal telopeptides in peri-implant and gingival crevicular fluid                                                                                                                          | Friedmann A.; Friedrichs M.; Kaner D.; Kleber B.-M.; Bernimoulin J.-P.                                           | 2006 |
| Outcome of implant therapy in patients with previous tooth loss due to periodontitis                                                                                                                                         | Schou S.; Holmstrup P.; Worthington H.V.; Esposito M.                                                            | 2006 |
| A systematic review of marginal soft tissue at implants subjected to immediate loading or immediate restoration                                                                                                              | Glauser R.; Zembic A.; Hämmerle C.H.F.                                                                           | 2006 |
| Comparison of hard tissue density changes around implants assessed in digitized conventional radiographs and subtraction images                                                                                              | Bittar-Cortez J.A.; Passeri L.A.; Bóscolo F.N.; Haiter-Neto F.                                                   | 2006 |
| Clinical applications of mini-implants as orthodontic anchorage and the peri-implant tissue reaction upon loading.                                                                                                           | Cho H.J.                                                                                                         | 2006 |
| Premature withdrawal and alternative therapies to dual oral antiplatelet therapy                                                                                                                                             | Collet J.-P.; Montalescot G.                                                                                     | 2006 |
| Matrix metalloproteinases: Contribution to pathogenesis, diagnosis and treatment of periodontal inflammation                                                                                                                 | Sorsa T.; Tjäderhane L.; Kontinen Y.T.; Lauhio A.; Salo T.; Lee H.-M.; Golub L.M.; Brown D.L.; Mäntylä P.        | 2006 |
| Clinical report with up to 4 years of follow-up on a cervically modified stepped screw-type implant                                                                                                                          | Weibrich G.; Streckbein P.; Krummenauer F.; Wagner W.                                                            | 2006 |
| Retrospective evaluation of temporary cemented, tooth and implant supported fixed partial dentures                                                                                                                           | Heinemann F.; Mundt T.; Biffar R.                                                                                | 2006 |
| Peri-implant soft-tissue health surrounding cement- and screw-retained implant restorations: A multicenter, 3-year prospective study                                                                                         | Weber H.P.; Kim D.M.; Ng M.W.; Hwang J.W.; Fiorellini J.P.                                                       | 2006 |
| IL-1RN gene polymorphism is associated with peri-implantitis                                                                                                                                                                 | Laine M.L.; Leonhardt Å.; Roos-Jansäker A.-M.; Peña A.S.; Van Winkelhoff A.J.; Winkel E.G.; Renvert S.           | 2006 |
| Influence of different treatment approaches on non-submerged and submerged healing of ligature induced peri-implantitis lesions: An experimental study in dogs                                                               | Schwarz F.; Jepsen S.; Hertel M.; Sager M.; Rothamel D.; Becker J.                                               | 2006 |
| Comparison of early telescope loading of non-submerged ITI implants in irradiated and non-irradiated oral cancer patients                                                                                                    | Landes C.A.; Kovács A.F.                                                                                         | 2006 |
| Stress and inflammation as a detrimental combination for peri-implant bone loss                                                                                                                                              | Heckmann S.M.; Linke J.J.; Graef F.; Foitzik Ch.; Wichmann M.G.; Weber H.-P.                                     | 2006 |
| Update in dental implant periapical surgery                                                                                                                                                                                  | Peñarrocha Diago M.; Boronat López A.; Lamas Pelayo J.                                                           | 2006 |
| Treatment of periapical dental implant pathology with guided bone regeneration                                                                                                                                               | Tözüm T.F.; Erdal C.; Saygun I.                                                                                  | 2006 |
| Correlations between clinical parameters and interleukin-6 and interleukin-10 levels in saliva from totally edentulous patients with peri-implant disease                                                                    | Liskmann S.; Vihalemm T.; Salum O.; Zilmer K.; Fischer K.; Zilmer M.                                             | 2006 |
| Healing of intrabony peri-implantitis defects following application of a nanocrystalline hydroxyapatite (Ostim™) or a bovine-derived xenograft (Bio-Oss™) in combination with a collagen membrane (Bio-Gide™). A case series | Schwarz F.; Bieling K.; Latz T.; Nuesry E.; Becker J.                                                            | 2006 |
| A new device in immediately loaded implant treatment in the edentulous mandible                                                                                                                                              | De Vasconcellos D.K.; Bottino M.A.; Saad P.A.; Faloppa F.                                                        | 2006 |
| Application of implant-supported telescopic overdenture in edentulous cases                                                                                                                                                  | Hu X.L.; Cui H.Y.; Wang T.; Li J.H.; Qiu L.X.; Lin Y.                                                            | 2006 |
| Fixed partial prostheses supported by 2 or 3 implants: A retrospective study up to 18 years                                                                                                                                  | Eliasson A.; Eriksson T.; Johansson A.; Wennerberg A.                                                            | 2006 |
| Effect of mechanical and antiseptic therapy on peri-implant mucositis: An experimental study in monkeys                                                                                                                      | Trejo P.M.; Bonaventura G.; Weng D.; Caffesse R.G.; Bragger U.; Lang N.P.                                        | 2006 |
| Lethal photosensitization and guided bone regeneration in treatment of peri-implantitis: An experimental study in dogs                                                                                                       | Shibli J.A.; Martins M.C.; Ribeiro F.S.; Garcia V.G.; Nociti Jr. F.H.; Marcantonio Jr. E.                        | 2006 |
| Dental implants in radiated areas: A series of 33 patients                                                                                                                                                                   | Bodard A.G.; Gourmet R.; Lucas R.; Bonnet E.; Breton P.                                                          | 2006 |
| Bone microvascular pattern around loaded dental implants in a canine model                                                                                                                                                   | Traini T.; Assenza B.; Roman F.S.; Thams U.; Caputi S.; Piattelli A.                                             | 2006 |
| Feasibility and influence of the microgap of two implants placed in a non-submerged procedure: A five- year follow-up clinical trial                                                                                         | Heijdenrijk K.; Raghoobar G.M.; Meijer H.J.A.; Stegenga B.; van der Reijden W.A.                                 | 2006 |
| Fat necrosis of the breast-A review                                                                                                                                                                                          | Tan P.H.; Lai L.M.; Carrington E.V.; Opaluwa A.S.; Ravikumar K.H.; Chetty N.; Kaplan V.; Kelley C.J.; Babu E.D.  | 2006 |
| Anterior teeth esthetics with the SPI implant system                                                                                                                                                                         | Kessler-Liechti G.; Mericske-Stern R.                                                                            | 2006 |
| Clinical study of periocline on peri-implantitis treatment                                                                                                                                                                   | Zhou L.; Lin Y.; Qiu L.X.; Chen B.; Hu X.L.; Wang X.                                                             | 2006 |
| Non-surgical treatment of peri-implant pathology.                                                                                                                                                                            | De Araújo Nobre M.; Capelas C.; Alves A.; Almeida T.; Carvalho R.; Antunes E.; Oliveira D.; Cardador A.; Maló P. | 2006 |
| Implant Surfaces                                                                                                                                                                                                             | Puleo D.A.; Thomas M.V.                                                                                          | 2006 |
| Expression of interleukin 1-beta, transforming growth factor beta-1, and vascular endothelial growth factor in soft tissue over the implant before uncovering                                                                | Schultze-Mosgau S.; Wehrhan F.; Wichmann M.; Schlegel K.A.; Holst S.; Thorwarth M.                               | 2006 |
| Clinical evaluation of 3 overdenture concepts with tooth roots and implants: 2-Year results                                                                                                                                  | Hug S.; Mantokoudis D.; Mericske-Stern R.                                                                        | 2006 |
| Bone height measurements around a dental implant after a 6-month space flight: A case report                                                                                                                                 | Haigueré C.; Jonas P.; Khayat P.; Girot G.                                                                       | 2006 |

|                                                                                                                                                             |                                                                                            |      |
|-------------------------------------------------------------------------------------------------------------------------------------------------------------|--------------------------------------------------------------------------------------------|------|
| Comparison of abciximab with "high-dose" tirofiban in patients undergoing percutaneous coronary intervention                                                | Gunasekara A.P.; Walters D.L.; Aroney C.N.                                                 | 2006 |
| Safety of percutaneous coronary interventions                                                                                                               | Schöbel W.A.                                                                               | 2006 |
| Nine- to fourteen-year follow-up of implant treatment. Part II: Presence of peri-implant lesions                                                            | Roos-Jansåker A.-M.; Lindahl C.; Renvert H.; Renvert S.                                    | 2006 |
| Nine- to fourteen-year follow-up of implant treatment. Part III: Factors associated with peri-implant lesions                                               | Roos-Jansåker A.-M.; Renvert H.; Lindahl C.; Renvert S.                                    | 2006 |
| Cathepsin K levels in the crevicular fluid of dental implants: A pilot study                                                                                | Strbac G.D.; Monov G.; Cei S.; Kandler B.; Watzek G.; Gruber R.                            | 2006 |
| Soft tissue around three different implant types after 1.5 years of functional loading without oral hygiene: A preliminary study in baboons                 | Watzak G.; Zechner W.; Tangl S.; Vasak C.; Donath K.; Watzek G.                            | 2006 |
| Tissue alterations at implant-supported single-tooth replacements: A 1-year prospective clinical study                                                      | Cardaropoli G.; Lekholm U.; Wennström J.L.                                                 | 2006 |
| Clinical and radiographic evaluation of small-diameter (3.3-mm) implants followed for 1-7 years: A longitudinal study                                       | Romeo E.; Lops D.; Amorfini L.; Chiapasco M.; Ghisolfi M.; Vogel G.                        | 2006 |
| Clinical outcome of implants placed immediately after implant removal                                                                                       | Covani U.; Barone A.; Cornellini R.; Crespi R.                                             | 2006 |
| Evaluation of stress induced in peri-implant bone tissue by misfit in multi-implant prosthesis.                                                             | Natali A.N.; Pavan P.G.; Ruggero A.L.                                                      | 2006 |
| Gene therapeutics for periodontal regenerative medicine                                                                                                     | Ramseier C.A.; Abramson Z.R.; Jin Q.; Giannobile W.V.                                      | 2006 |
| Preliminary clinical study of microimplants in the restoration of edentulous jaws                                                                           | Chen B.; Lin Y.; di P.; Li J.H.; Qiu L.X.                                                  | 2006 |
| The consequences of neural degeneration regarding optimal cochlear implant position in scala tympani: A model approach                                      | Briaire J.J.; Frijns J.H.M.                                                                | 2006 |
| Estradiol alters only GAD67 mRNA levels in ischemic rat brain with no consequent effects on GABA                                                            | Joh H.-D.; Searles R.V.; Selmankoff M.; Alkayed N.J.; Koehler R.C.; Hurn P.D.; Murphy S.J. | 2006 |
| The influence of hormonal replacement therapy on alveolar ridge bone in perimenopausal women                                                                | Bakalczuk M.; Bakalczuk S.; Rózyło T.K.; Kleinrok J.                                       | 2006 |
| Analysis of aspartate aminotransferase and alkaline phosphatase in crevicular fluid from implants with and without peri-implantitis.                        | Paknejad M.; Emtiaz S.; Khoobyari M.M.; Gharb M.T.; Yazdi M.T.                             | 2006 |
| Histomorphometric and fluorescence microscopic evaluation of interfacial bone healing around 3 different dental implants before and after radiation therapy | Weinlaender M.; Beumer III J.; Kenney E.B.; Lekovic V.; Holmes R.; Moy P.K.; Plenk Jr. H.  | 2006 |
| Peri-implant papilla reconstruction: Realities and limitations                                                                                              | Pradeep A.R.; Karthikeyan B.V.                                                             | 2006 |
| Profilometric and standard error of the mean analysis of rough implant surfaces treated with different instrumentations.                                    | Ramaglia L.; di Lauro A.E.; Morgese F.; Squillace A.                                       | 2006 |
| Clinical and radiological results of patients treated with two loading protocols for mandibular overdentures on Brånemark implants                          | Turkyilmaz I.                                                                              | 2006 |
| Influence of prosthetic parameters on the survival and complication rates of short implants                                                                 | Tawil G.; Aboujaoude N.; Younan R.                                                         | 2006 |
| Implant-supported mandibular overdentures retained with ball or telescopic crown attachments: A 3-year prospective study                                    | Krennmair G.; Weinländer M.; Krainhöfner M.; Piehslinger E.                                | 2006 |
| A clinical retrospective study of 10 years implant results                                                                                                  | Lin Y.; Li J.H.; Qiu L.X.; Di P.; Hu X.L.; Wang X.                                         | 2006 |
| Rehabilitation by means of osseointegrated implants in oral cancer patients with about four to six years follow-up                                          | Sekine J.; Sano K.; Ikeda H.; Inokuchi T.                                                  | 2006 |
| The implantable gastric stimulator for obesity: An update of the European experience in the LOSS (Laparoscopic Obesity Stimulation Survey) study            | Miller K.; Hoeller E.; Aigner F.                                                           | 2006 |
| Bacterial colonisation of interior implant threads with and without sealing                                                                                 | Proff P.; Steinmetz I.; Bayerlein T.; Dietze S.; Fanghänel J.; Gedrange T.                 | 2006 |
| Long-term evaluation of hollow screw and hollow cylinder dental implants: Clinical and radiographic results after 10 years                                  | Telleman G.; Meijer H.J.A.; Raghoobar G.M.                                                 | 2006 |
| Peri-implant bone organization under immediate loading state. Circularly polarized light analyses: A minipig study                                          | Neugebauer J.; Traini T.; Thams U.; Piattelli A.; Zöller J.E.                              | 2006 |
| Implant-borne prosthetic rehabilitation of bone-grafted cleft versus traumatic anterior maxillary defects                                                   | Landes C.A.                                                                                | 2006 |
| Prosthetic treatment of maxillary lateral incisor agenesis with osseointegrated implants: A 24-39-month prospective clinical study                          | Zarone F.; Sorrentino R.; Vaccaro F.; Russo S.                                             | 2006 |
| Bone graft substitutes in periodontal and peri-implant bone regeneration                                                                                    | Bayerlein T.; Mundt T.; Mack F.; Bienengraber V.; Proff P.; Gedrange T.                    | 2006 |
| Investigation of peri-implant status and risk variables for implant failure in body of maxilla after oral tumor surgery                                     | Rao N.; Cao Y.; Wei W.                                                                     | 2006 |
| Outcomes of fixed prostheses supported by immediately loaded endosseous implants                                                                            | Tortamano P.; Orii T.C.; Yamanochi J.; Nakamae A.E.M.; Guarnieri T.D.C.                    | 2006 |
| Diabetic Nephropathy and heart surgery - Prevention of perioperative acute renal failure                                                                    | Lonnemann G.                                                                               | 2006 |
| Cerebral protection devices for use during carotid artery angioplasty with stenting: A health technology assessment                                         | Menon D.; Stafinski T.                                                                     | 2006 |
| Unexpected return of sensation following 4.5 years of paresthesia: case report.                                                                             | Elian N.; Mitsias M.; Eskow R.; Jalbout Z.N.; Cho S.C.; Froum S.; Tarnow D.P.              | 2005 |
| Detection and measurements of soluble intercellular adhesion molecules at implants and teeth: A comparative study                                           | Oezcakar C.; Fekry-Khedr M.; Mericske-Stern R.                                             | 2005 |

|                                                                                                                                                                              |                                                                                                                  |      |
|------------------------------------------------------------------------------------------------------------------------------------------------------------------------------|------------------------------------------------------------------------------------------------------------------|------|
| Early loading of non-submerged titanium implants with a sandblasted and acid-etched surface. 5-year results of a prospective study in partially edentulous patients.         | Bornstein M.M.; Schmid B.; Belser U.C.; Lussi A.; Buser D.                                                       | 2005 |
| Bone response to submerged, unloaded implants inserted in poor bone sites: a histological and histomorphometrical study of 8 titanium implants retrieved from man.           | Iezzi G.; Degidi M.; Scarano A.; Perrotti V.; Piattelli A.                                                       | 2005 |
| Implant rehabilitation of severely traumatised anterior alveolar ridge                                                                                                       | Kao S.-Y.; Fong H.-J.; Lui M.-T.; Chou S.-J.; Yeung T.-C.; Hung K.-F.; Wu C.-H.; Yu E.-H.; Wu H.-T.; Chang C.-S. | 2005 |
| Endpoints and survival analysis for successful osseointegration of dental implants                                                                                           | Gerds T.A.; Vogeler M.                                                                                           | 2005 |
| Implant stability during initiation and resolution of experimental periimplantitis: An experimental study in the dog                                                         | Sennerby L.; Persson L.G.; Berglundh T.; Wennerberg A.; Lindhe J.                                                | 2005 |
| Common complications after cardiac surgery in the adult: Anecdotes, biases... and some evidence                                                                              | Foot C.L.; Fraser J.F.; Mullany D.V.                                                                             | 2005 |
| A new implant design for crestal bone preservation: initial observations and case report.                                                                                    | Baumgarten H.; Cocchetto R.; Testori T.; Meltzer A.; Porter S.                                                   | 2005 |
| Principles and mechanisms of peri-implant soft tissue healing                                                                                                                | Schultze-Mosgau S.; Blatz M.B.; Wehrhan F.; Schlegel K.A.; Thorwart M.; Holst S.                                 | 2005 |
| Bilaminar subepithelial connective tissue grafts for immediate implant placement and provisionalization in the esthetic zone.                                                | Kan J.Y.; Rungcharassaeng K.; Lozada J.L.                                                                        | 2005 |
| Current concepts in periodontal bioengineering.                                                                                                                              | Taba Jr. M.; Jin Q.; Sugai J.V.; Giannobile W.V.                                                                 | 2005 |
| Guided bone regeneration around non-submerged implants in narrow alveolar ridges: a prospective long-term clinical study.                                                    | De Boever A.L.; De Boever J.A.                                                                                   | 2005 |
| Predisposing conditions for retrograde peri-implantitis, and treatment suggestions.                                                                                          | Quirynen M.; Vogels R.; Alsaadi G.; Naert I.; Jacobs R.; van Steenberghe D.                                      | 2005 |
| Peri-implant osteogenesis in health and osteoporosis                                                                                                                         | Marco F.; Milena F.; Gianluca G.; Vittoria O.                                                                    | 2005 |
| A comparison between enamel matrix derivative and a bioabsorbable membrane to enhance healing around transmucosal immediate post-extraction implants                         | Cangini F.; Cornolini R.                                                                                         | 2005 |
| Immediate restoration of implants placed into fresh extraction sockets for single-tooth replacement: A prospective clinical study                                            | Cornolini R.; Cangini F.; Covani U.; Wilson Jr. T.G.                                                             | 2005 |
| Influence of alcohol and tobacco habits on peri-implant marginal bone loss: a prospective study.                                                                             | Galindo-Moreno P.; Fauri M.; Avila-Ortiz G.; Fernández-Barbero J.E.; Cabrera-León A.; Sánchez-Fernández E.       | 2005 |
| A method using vestibulo-sulcoplasty combining a split-thickness skin graft and a palatal keratinized mucosa graft for peri-implant tissue secondary to oral cancer surgery. | Kao S.Y.; Lui M.T.; Fong J.; Wu D.C.; Wu C.H.; Tu H.F.; Hung K.F.; Yeung T.C.                                    | 2005 |
| Performance of short implants in partial restorations: 3-Year follow-up of Osseotite® implants                                                                               | Goené R.; Bianchesi C.; Hüerzeler M.; Del Lupo R.; Testori T.; Davarpanah M.; Jalbout Z.                         | 2005 |
| Implant-prosthetic treatment for special care patients: A case series study                                                                                                  | Öczakir C.; Balmer S.; Mericske-Stern R.                                                                         | 2005 |
| Combined sinus lift procedure and lateral augmentation. A treatment concept for the surgical and prosthetic rehabilitation of the extremely atrophic maxilla                 | Weingart D.; Bublitz R.; Petrin G.; Kälber J.; Ingimarsson S.                                                    | 2005 |
| Sinus floor elevation: a revised osteotome technique and its biological concept.                                                                                             | Li T.F.                                                                                                          | 2005 |
| Progression of experimental chronic peri-implantitis in dogs: Clinical and radiographic evaluation                                                                           | Martins M.C.; Shibli J.A.; Abi-Rached R.S.G.; Marcantonio Jr. E.                                                 | 2005 |
| Comparative study between the effects of photodynamic therapy and conventional therapy on microbial reduction in ligature-induced peri-implantitis in dogs                   | Hayek R.R.A.; Araújo N.S.; Gioso M.A.; Ferreira J.; Baptista-Sobrinho C.A.; Yamada Jr. A.M.; Ribeiro M.S.        | 2005 |
| Implants in regenerated bone in patients treated for generalized aggressive periodontitis: A prospective longitudinal study                                                  | Mengel R.; Flores-De-Jacoby L.                                                                                   | 2005 |
| Peri-implant bone response to orthodontic loading: Part 1. a histomorphometric study of the effects of implant surface design                                                | Oyonarte R.; Pilliar R.M.; Deporter D.; Woodside D.G.                                                            | 2005 |
| Peri-implant bone response to orthodontic loading: Part 2. Implant surface geometry and its effect on regional bone remodeling                                               | Oyonarte R.; Pilliar R.M.; Deporter D.; Woodside D.G.                                                            | 2005 |
| Comparative evaluation of implant designs: influence of diameter, length, and taper on strains in the alveolar crest. A three-dimensional finite-element analysis.           | Petrie C.S.; Williams J.L.                                                                                       | 2005 |
| Non-invasive method to measure the length of soft tissue from the top of the papilla to the crestal bone                                                                     | Lee D.-W.; Kim C.-K.; Park K.-H.; Cho K.-S.; Moon I.-S.                                                          | 2005 |
| Peri-implant bone reaction to immediate, early, and delayed orthodontic loading in humans                                                                                    | Trisi P.; Rebaudi A.                                                                                             | 2005 |
| Future perspectives in the treatment of femoro-popliteal arterial occlusions                                                                                                 | Gisbertz S.S.; Hissink R.J.; Devries J.-P.P.M.; Moll F.L.                                                        | 2005 |
| Peri-implantitis                                                                                                                                                             | Klinge B.; Hultin M.; Berglundh T.                                                                               | 2005 |
| Analysis of the possible impact of inflammation severity and early and delayed loading on nitric oxide metabolism around dental implants.                                    | Tözüm T.F.; Türkyilmaz I.; Yamalik N.; Tümer C.; Kiliç A.; Kiliç K.; Karabulut E.; Eratalay K.                   | 2005 |
| Cutting balloons versus conventional long balloons for PCI of long coronary lesions                                                                                          | Han B.; Aboud M.; Nahir M.; Noem F.; Hasin Y.                                                                    | 2005 |
| Clinical consequences of IL-1 genotype on early implant failures in patients under periodontal maintenance                                                                   | Jansson H.; Hamberg K.; De Bruyn H.; Bratthall G.                                                                | 2005 |
| Detection of implant crevicular fluid prostaglandin E2 levels for the assessment of peri-implant health: A pilot study                                                       | Yalçin S.; Başgeçmez C.; Mijiritsky E.; Yalçin F.; Işık G.; Onan U.                                              | 2005 |



|                                                                                                                                                                                                    |                                                                                                                                                                 |      |
|----------------------------------------------------------------------------------------------------------------------------------------------------------------------------------------------------|-----------------------------------------------------------------------------------------------------------------------------------------------------------------|------|
| Treatment of peri-implantitis by the Vector system.                                                                                                                                                | Karring E.S.; Stavropoulos A.; Ellegaard B.; Karring T.                                                                                                         | 2005 |
| Implant-supported single-tooth restorations: A 5-year prospective study                                                                                                                            | Wennström J.L.; Ekestubbe A.; Gröndahl K.; Karlsson S.; Lindhe J.                                                                                               | 2005 |
| Long-term results and survival rate of implants treated with guided bone regeneration: a 5-year case series prospective study.                                                                     | Blanco J.; Alonso A.; Sanz M.                                                                                                                                   | 2005 |
| The impact of nicotine on bone healing and osseointegration.                                                                                                                                       | Balatouka D.; Gotfredsen K.; Lindh C.H.; Berglundh T.                                                                                                           | 2005 |
| Peri-operative management of patients on Warfarin: A survey of current practice                                                                                                                    | Shetty A.; Manimaran N.; Faber R.G.; Galland R.B.                                                                                                               | 2005 |
| Peri-implant care with the CO2 laser: In vitro and in vivo results                                                                                                                                 | Deppe H.; Horch H.-H.; Greim H.; Brill T.; Wagenpfeil S.; Donath K.                                                                                             | 2005 |
| Anti-infective therapy with an Er:YAG laser: Influence on peri-implant healing                                                                                                                     | Sculean A.; Schwarz F.; Becker J.                                                                                                                               | 2005 |
| Clinical and radiographic performance of delayed-immediate single-tooth implant placement associated with peri-implant bone defects. A 2-year prospective, controlled, randomized follow-up report | Schropp L.; Kostopoulos L.; Wenzel A.; Isidor F.                                                                                                                | 2005 |
| Crestal bone changes around titanium implants. Part I: A retrospective radiographic evaluation in humans comparing two non-submerged implant designs with different machined collar lengths        | Hänggi M.P.; Hänggi D.C.; Schoolfield J.D.; Meyer J.; Cochran D.L.; Hermann J.S.                                                                                | 2005 |
| A 5-year prospective study on small diameter screw-shaped oral implants                                                                                                                            | Comfort M.B.; Chu F.C.S.; Chai J.; Wat P.Y.P.; Chow T.W.                                                                                                        | 2005 |
| Initial subgingival colonization of 'pristine' pockets.                                                                                                                                            | Quirynen M.; Vogels R.; Pauwels M.; Haffajee A.D.; Socransky S.S.; Uzel N.G.; van Steenberghe D.                                                                | 2005 |
| Modulating the effects of diabetes on osseointegration with aminoguanidine and doxycycline                                                                                                         | Kopman J.A.; Kim D.M.; Rahman S.S.; Arandia J.A.; Karimbux N.Y.; Fiorellini J.P.                                                                                | 2005 |
| Does dedicated pre-abortion contraception counselling help to improve post-abortion contraception uptake?                                                                                          | Yassin A.S.; Cordwell D.                                                                                                                                        | 2005 |
| Post-treatment residual tissue in idiopathic retroperitoneal fibrosis: Active residual disease or silent "scar"? A study using 18F-fluorodeoxyglucose positron emission tomography                 | Vaglio A.; Greco P.; Versari A.; Filice A.; Cobelli R.; Manenti L.; Salvarani C.; Buzio C.                                                                      | 2005 |
| Endovascular stent-graft treatment of aortic dissection: Determinants of post-interventional outcome                                                                                               | Eggebrecht H.; Herold U.; Kuhnt O.; Schmermund A.; Bartel T.; Martini S.; Lind A.; Naber C.K.; Kienbaum P.; Kühl H.; Peters J.; Jakob H.; Erbel R.; Baumgart D. | 2005 |
| Therapy of peri-implantitis with resective surgery. A 3-year clinical trial on rough screw-shaped oral implants. Part I: clinical outcome.                                                         | Romeo E.; Ghisolfi M.; Murgolo N.; Chiapasco M.; Lops D.; Vogel G.                                                                                              | 2005 |
| Clinical evaluation of an Er:YAG laser for nonsurgical treatment of peri-implantitis: a pilot study.                                                                                               | Schwarz F.; Sculean A.; Rothamel D.; Schwenzer K.; Georg T.; Becker J.                                                                                          | 2005 |
| Mandibular overdentures supported by two or four endosseous implants. A 5-year prospective study.                                                                                                  | Visser A.; Raghoobar G.M.; Meijer H.J.; Batenburg R.H.; Vissink A.                                                                                              | 2005 |
| Using photodynamic therapy to treat peri-implantitis. Interview.                                                                                                                                   | Neugebauer J.                                                                                                                                                   | 2005 |
| Analysis of the presence of pathogens which predict the risk of disease at peri-implant sites through polymerase chain reaction (PCR).                                                             | de Leão J.A.; De Lorenzo J.L.; Avila-Campos M.J.; Sendyk W.R.                                                                                                   | 2005 |
| Halitosis: Classification, causes, and diagnostic as well as treatment approach - A review                                                                                                         | Mahadeva Rao U.S.; Utharkar S.M.; Sundaram C.S.                                                                                                                 | 2005 |
| DNA probe identification of bacteria colonizing internal surfaces of the implant-abutment interface: A preliminary study                                                                           | Callan D.P.; Cobb C.M.; Williams K.B.                                                                                                                           | 2005 |
| Endovascular aortic aneurysm repair by a multidisciplinary team: Lessons learned and six-year clinical update                                                                                      | Du Toit D.F.; Saaiman J.A.; Carpenter J.P.; Geldenhuys K.M.                                                                                                     | 2005 |
| Diagnostic parameters for monitoring peri-implant conditions                                                                                                                                       | Salvi G.E.; Lang N.P.                                                                                                                                           | 2004 |
| Antimicrobial treatment of peri-implant diseases                                                                                                                                                   | Heitz-Mayfield L.J.A.; Lang N.P.                                                                                                                                | 2004 |
| Surgical treatment of peri-implantitis                                                                                                                                                             | Schou S.; Berglundh T.; Lang N.P.                                                                                                                               | 2004 |
| Treatment of periimplantitis with laser or ultrasound. A review of the literature                                                                                                                  | Schwarz F.; Bieling K.; Sculean A.; Herten M.; Becker J.                                                                                                        | 2004 |
| A systematic review of the survival and complication rates of fixed partial dentures (FPDs) after an observation period of at least 5 years: I. Implant-supported FPDs                             | Pjetursson B.E.; Tan K.; Lang N.P.; Brägger U.; Egger M.; Zwahlen M.                                                                                            | 2004 |
| Immediate or early placement of implants following tooth extraction: Review of biologic basis, clinical procedures, and outcomes                                                                   | Chen S.T.; Wilson Jr. T.G.; Hämmerle C.H.F.                                                                                                                     | 2004 |
| A systematic review of the survival and complication rates of fixed partial dentures (FPDs) after an observation period of at least 5 years: II. Combined tooth-implant-supported FPDs             | Lang N.P.; Pjetursson B.E.; Tan K.; Brägger U.; Egger M.; Zwahlen M.                                                                                            | 2004 |
| Private practice results of dental implants. Part I: Survival and evaluation of risk factors - Part II: Surgical and prosthetic complications                                                      | Kourtis S.G.; Sotiriadou S.; Voliotis S.; Challas A.                                                                                                            | 2004 |
| Periimplantitis.                                                                                                                                                                                   | Sánchez-Gárces M.A.; Gay-Escoda C.                                                                                                                              | 2004 |
| Long-term implant survival in the grafted maxilla: Results of a 12-year retrospective study                                                                                                        | Yerit K.C.; Posch M.; Hainich S.; Turhani D.; Klug C.; Wanschitz F.; Wagner A.; Watzinger F.; Ewers R.                                                          | 2004 |
| Interventions for replacing missing teeth: maintaining health around dental implants.                                                                                                              | Esposito M.; Worthington H.V.; Thomsen P.; Coulthard P.                                                                                                         | 2004 |
| A three-year follow-up report of a comparative study of ITI Dental Implants® and Brånemark System® implants in the treatment of the partially edentulous maxilla                                   | Åstrand P.; Engquist B.; Anzén B.; Bergendal T.; Hallman M.; Karlsson U.; Kvint S.; Lysell L.; Rundcranz T.                                                     | 2004 |
| Bucco-lingual crestal bone changes after immediate and delayed implant placement                                                                                                                   | Covani U.; Bortolaia C.; Barone A.; Sbordone L.                                                                                                                 | 2004 |

|                                                                                                                                                                 |                                                                                                                                                                                                                                  |      |
|-----------------------------------------------------------------------------------------------------------------------------------------------------------------|----------------------------------------------------------------------------------------------------------------------------------------------------------------------------------------------------------------------------------|------|
| Carbon dioxide laser and hydrogen peroxide conditioning in the treatment of periimplantitis: An experimental study in the dog                                   | Persson L.G.; Mouhyi J.; Berglundh T.; Sennerby L.; Lindhe J.                                                                                                                                                                    | 2004 |
| Perioperative anticoagulation for patients with mechanical heart valves: A survey of current practice                                                           | Garcia D.A.; Ageno W.; Libby E.N.; Bibb J.; Douketis J.; Crowther M.A.                                                                                                                                                           | 2004 |
| Implant plastic surgery: a review and rationale.                                                                                                                | Kazor C.E.; Al-Shammari K.; Sarment D.P.; Misch C.E.; Wang H.L.                                                                                                                                                                  | 2004 |
| Reversible and irreversible peri-implant lesions: report and etiopathogenic analysis of 7 cases.                                                                | Wiskott H.W.; Dubrez B.; Scherrer S.S.; Belser U.C.                                                                                                                                                                              | 2004 |
| Experimental peri-implant tissue breakdown around different dental implant surfaces: Clinical and radiographic evaluation in dogs                               | Martins M.C.; Abi-Rached R.S.G.; Shibli J.A.; Araujo M.W.B.; Marcantonio Jr. E.                                                                                                                                                  | 2004 |
| Immediate loading of dental implants placed in revascularized fibula free flaps: A clinical report on 2 consecutive patients                                    | Chiapasco M.; Gatti C.                                                                                                                                                                                                           | 2004 |
| A comparison of characteristics of implant failure and survival in periodontally compromised and periodontally healthy patients: A clinical report              | Rosenberg E.S.; Cho S.-C.; Elian N.; Jalbout Z.N.; Froum S.; Evian C.I.                                                                                                                                                          | 2004 |
| Immediate loading of 2 interforaminal dental implants supporting an overdenture: Clinical and radiographic results after 24 months                              | Stricker A.; Gutwald R.; Schmelzeisen R.; Gellrich N.G.                                                                                                                                                                          | 2004 |
| Effects of post-surgical cleansing protocols on early plaque control in periodontal and/or periimplant wound healing                                            | Heitz F.; Heitz-Mayfield L.J.A.; Lang N.P.                                                                                                                                                                                       | 2004 |
| [Clinical application of miniscrew implant for maximum anchorage cases].                                                                                        | Xun C.L.; Zeng X.L.; Wang X.                                                                                                                                                                                                     | 2004 |
| Treatment of midfacial defects using prostheses supported by ITI dental implants                                                                                | Scolozzi P.; Jaques B.                                                                                                                                                                                                           | 2004 |
| Controversies in cervical discectomy and fusion: Practice patterns among Canadian surgeons                                                                      | Pickett G.E.; Van Soelen J.; Duggal N.                                                                                                                                                                                           | 2004 |
| Correlation of peri-implant health and myeloperoxidase levels: a cross-sectional clinical study.                                                                | Liskmann S.; Zilmer M.; Vihalemm T.; Salum O.; Fischer K.                                                                                                                                                                        | 2004 |
| Sustained release of doxycycline for the treatment of peri-implantitis: Randomised controlled trial                                                             | Büchter A.; Meyer U.; Kruse-Lösler B.; Joos U.; Kleinheinz J.                                                                                                                                                                    | 2004 |
| Submental cutaneous sinus tract as a result of progressive peri-implantitis: A case report                                                                      | Nkenke E.; Amann K.; Reich S.; Neukam F.W.; Frankenberger R.                                                                                                                                                                     | 2004 |
| Mandibular two-implant telescopic overdentures.                                                                                                                 | Heckmann S.M.; Schrott A.; Graef F.; Wichmann M.G.; Weber H.P.                                                                                                                                                                   | 2004 |
| Treatment of incipient peri-implant infections using topical minocycline microspheres versus topical chlorhexidine gel as an adjunct to mechanical debridement. | Renvert S.; Lessem J.; Lindahl C.; Svensson M.                                                                                                                                                                                   | 2004 |
| Management and prevention of retrograde peri-implant infection from retained root tips: Two case reports                                                        | Park S.-H.; Sorensen W.P.; Wang H.-L.                                                                                                                                                                                            | 2004 |
| Reconstruction of maxillary and mandibular defects using prefabricated microvascular fibular grafts and osseointegrated dental implants -- a prospective study. | Jaquière C.; Rohner D.; Kunz C.; Bucher P.; Peters F.; Schenk R.K.; Hammer B.                                                                                                                                                    | 2004 |
| Effects of combined estrogen and progesterone on brain infarction in reproductively senescent female rats                                                       | Toung T.J.; Chen T.-Y.; Littleton-Kearney M.T.; Hurn P.D.; Murphy S.J.                                                                                                                                                           | 2004 |
| Oral rehabilitation with implant-supported fixed partial dentures in periodontitis-susceptible subjects: A 5-year prospective study                             | Wennström J.L.; Ekstrubbe A.; Gröndahl K.; Karlsson S.; Lindhe J.                                                                                                                                                                | 2004 |
| Clinical analysis of wide-diameter frialit-2 implants                                                                                                           | Krennmair G.; Waldenberger O.                                                                                                                                                                                                    | 2004 |
| A 10-year randomized clinical trial on the influence of splinted and unsplinted oral implants retaining mandibular overdentures: Peri-implant outcome           | Naert I.; Alsaadi G.; Van Steenberghe D.; Quirynen M.                                                                                                                                                                            | 2004 |
| Loaded custom-made zirconia and titanium implants show similar osseointegration: An animal experiment                                                           | Kohal R.J.; Weng D.; Bächle M.; Strub J.R.                                                                                                                                                                                       | 2004 |
| A clinical evaluation of the zygoma fixture: One year of follow-up at 16 clinics                                                                                | Hirsch J.-M.; Hrnell L.-O.; Henry P.J.; Andreasson L.; Brnemark P.-I.; Chiapasco M.; Gynther G.; Finne K.; Higuchi K.W.; Isaksson S.; Kahnberg K.-E.; Malevez C.; Neukam F.W.; Sevetz Jr. E.; Urgell J.P.; Widmark G.; Bolind P. | 2004 |
| Effect of the difference of bone turnover on peri-titanium implant osteogenesis in ovariectomized rats                                                          | Okamura A.; Ayukawa Y.; Iyama S.; Koyano K.                                                                                                                                                                                      | 2004 |
| Moderate hypothermia for 359 operations to clip cerebral aneurysms                                                                                              | Kimme P.; Fridrikssen S.; Engdahl O.; Hillman J.; Vegfors M.; Sjöberg F.                                                                                                                                                         | 2004 |
| The use of short, wide implants in posterior areas with reduced bone height: A retrospective investigation                                                      | Griffin T.J.; Cheung W.S.                                                                                                                                                                                                        | 2004 |
| Potential applications of Erbium:YAG laser in periodontics                                                                                                      | Ishikawa I.; Aoki A.; Takasaki A.A.                                                                                                                                                                                              | 2004 |
| Crestal bone resorption 5 years after implant loading: Clinical and radiologic results with a 2-stage implant system                                            | Ricci G.; Aimetti M.; Stablum W.; Guasti A.                                                                                                                                                                                      | 2004 |
| Critical soft tissue parameters of the zygomatic implant                                                                                                        | Al-Nawas B.; Wegener J.; Bender C.; Wagner W.                                                                                                                                                                                    | 2004 |
| Soft tissue healing around implants placed immediately after tooth extraction without incision: A clinical report                                               | Covani U.; Barone A.; Cornellini R.; Crespi R.                                                                                                                                                                                   | 2004 |
| Mandibular overdentures supported by two Brånemark, IMZ or ITI implants: A 5-year prospective study                                                             | Meijer H.J.A.; Batenburg R.H.K.; Raghoobar G.M.; Vissink A.                                                                                                                                                                      | 2004 |
| Does excessive occlusal load affect osseointegration? An experimental study in the dog.                                                                         | Heitz-Mayfield L.J.; Schmid B.; Weigel C.; Gerber S.; Bosshardt D.D.; Jönsson J.; Lang N.P.; Jönsson J.                                                                                                                          | 2004 |
| Implant therapy following liver transplantation: Clinical and microbiological results after 10 years                                                            | Heckmann S.H.; Heckmann J.G.; Linke J.J.; Hohenberger W.; Mombelli A.                                                                                                                                                            | 2004 |
| Single-tooth replacement by immediate implant and connective tissue graft: a 1-9-year clinical evaluation.                                                      | Bianchi A.E.; Sanfilippo F.                                                                                                                                                                                                      | 2004 |

|                                                                                                                                                                          |                                                                                                                                                       |      |
|--------------------------------------------------------------------------------------------------------------------------------------------------------------------------|-------------------------------------------------------------------------------------------------------------------------------------------------------|------|
| Prophylactic root resection and periapical grafting for anterior implant aethetics: an integration of tissue-reconstruction and tissue-preservation concepts.            | Kan J.Y.; Rungcharassaeng K.                                                                                                                          | 2004 |
| The Agility total ankle arthroplasty: Seven to sixteen-year follow-up                                                                                                    | Knecht S.I.; Estin M.; Callaghan J.J.; Zimmerman M.B.; Alliman K.J.; Alvine F.G.; Saltzman C.L.                                                       | 2004 |
| Intraoperative hip fractures: Ruining your day                                                                                                                           | Cameron H.U.                                                                                                                                          | 2004 |
| Expression of soluble intercellular adhesion molecule-1 in peri-implant sulcular fluid                                                                                   | Xie Z.-G.; Huang P.; Liang X.; Chen M.; Yang X.-Y.                                                                                                    | 2004 |
| Peri-implant diseases. A systematic review of the literature.                                                                                                            | Romeo E.; Ghisolfi M.; Carmagnola D.                                                                                                                  | 2004 |
| A technique for standardized evaluation of soft and hard peri-implant tissues in partially edentulous patients                                                           | Meijndert L.; Meijer H.J.A.; Raghoobar G.M.; Vissink A.                                                                                               | 2004 |
| Experimental zirconia abutments for implant-supported single-tooth restorations in esthetically demanding regions: 4-Year results of a prospective clinical study        | Glauser R.; Sailer I.; Wohlwend A.; Studer S.; Schibli M.; Schärer P.                                                                                 | 2004 |
| Early loading of ITI implants supporting a maxillary full-arch prosthesis: 1-Year data of a prospective, randomized study                                                | Fischer K.; Stenberg T.                                                                                                                               | 2004 |
| A prospective evaluation of Frialoc implants with ball-abutments in the edentulous mandible: 1-year results.                                                             | Cune M.S.; Verhoeven J.W.; Meijer G.J.                                                                                                                | 2004 |
| Submerged or non-submerged healing of endosseous implants to be used in the rehabilitation of partially dentate patients.                                                | Cecchinato D.; Olsson C.; Lindhe J.                                                                                                                   | 2004 |
| Evaluation of Matrix Metalloproteinase-9 and Tissue Inhibitor of Metalloproteinase-1 Levels in Peri-implant Sulcular Fluid                                               | Lu S.-H.; Liang X.; Xie Z.-G.; Zhang J.-Y.; Xu L.; Sun H.-Q.                                                                                          | 2004 |
| Immediate loading of hydroxyapatite-coated implants in the maxillary premolar area: Three-year results of a pilot study                                                  | Proussaefs P.; Lozada J.                                                                                                                              | 2004 |
| Cemented versus screw-retained implant-supported single-tooth crowns: A 4-year prospective clinical study                                                                | Vigolo P.; Givani A.; Majzoub Z.; Cordioli G.                                                                                                         | 2004 |
| Comparative value of attachment measurements in implant dentistry                                                                                                        | Deppe H.; Wagenpfeil S.; Donath K.                                                                                                                    | 2004 |
| Effect of platelet-rich plasma on the peri-implant bone response: an experimental study.                                                                                 | Fontana S.; Olmedo D.G.; Linares J.A.; Guglielmotti M.B.; Crosa M.E.                                                                                  | 2004 |
| Long-term survival and success of oral implants in the treatment of full and partial arches: A 7-year prospective study with the ITI dental implant system               | Romeo E.; Lops D.; Margutti E.; Ghisolfi M.; Chiapasco M.; Vogel G.                                                                                   | 2004 |
| The vanguard endovascular stent-graft: Mid-term results from a single centre                                                                                             | Holtham S.J.; Rose J.D.G.; Jackson R.W.; Lees T.A.; Wyatt M.G.                                                                                        | 2004 |
| Effect of implant design on survival and success rates of titanium oral implants: a 10-year prospective cohort study of the ITI Dental Implant System.                   | Karoussis I.K.; Brägger U.; Salvi G.E.; Bürgin W.; Lang N.P.                                                                                          | 2004 |
| Association between periodontal and peri-implant conditions: a 10-year prospective study.                                                                                | Karoussis I.K.; Müller S.; Salvi G.E.; Heitz-Mayfield L.J.; Brägger U.; Lang N.P.                                                                     | 2004 |
| Histomorphometrical and clinical comparison of submerged and nonsubmerged implants subjected to experimental peri-implantitis in dogs.                                   | Zechner W.; Kneissel M.; Kim S.; Ulm C.; Watzek G.; Plenck Jr. H.                                                                                     | 2004 |
| Factors regulating osteoclast formation in human tissues adjacent to peri-implant bone loss: Expression of receptor activator NFκB, RANK ligand and osteoprotegerin      | Crotti T.N.; Smith M.D.; Findlay D.M.; Zreiqat H.; Ahern M.J.; Weedon H.; Hatzinikolous G.; Capone M.; Holding C.; Haynes D.R.                        | 2004 |
| The role of keratinized tissue and attached gingiva in maintaining periodontal/peri-implant health.                                                                      | Marquez I.C.                                                                                                                                          | 2004 |
| Clinical Evaluation of Small-Diameter ITI Implants: A Prospective Study                                                                                                  | Zinsli B.; Sägesser T.; Mericske E.; Mericske-Stern R.                                                                                                | 2004 |
| A Prospective Study of the Risk Factors Associated with Failure of Mini-implants Used for Orthodontic Anchorage                                                          | Cheng S.-J.; Tseng I.-Y.; Lee J.-J.; Kok S.-H.                                                                                                        | 2004 |
| [The clinical evaluation on aesthetic effectiveness of implant supported dentures in partially edentulous patients].                                                     | Tang Q.; Liang X.; Huang L.; Zhang Q.H.                                                                                                               | 2004 |
| Prospective, Randomized Evaluation of Thrombectomy Prior to Percutaneous Intervention in Diseased Saphenous Vein Grafts and Thrombus-Containing Coronary Arteries        | Stone G.W.; Cox D.A.; Babb J.; Nukta D.; Bilodeau L.; Cannon L.; Stuckey T.D.; Hermiller J.; Cohen E.A.; Low R.; Bailey S.R.; Lansky A.J.; Kuntz R.E. | 2003 |
| Levels and molecular forms of MMP-7 (matrilysin-1) and MMP-8 (collagenase-2) in diseased human peri-implant sulcular fluid                                               | Kivelä-Rajamäki M.; Maisi P.; Srinivas R.; Tervahartala T.; Teronen O.; Husa V.; Salo T.; Sorsa T.                                                    | 2003 |
| Simultaneous or staged installation with guided bone augmentation of transmucosal titanium implants: A 3-year prospective cohort study                                   | Christensen D.K.; Karoussis I.K.; Joss A.; Hämmerle C.H.F.; Lang N.P.                                                                                 | 2003 |
| Dental implants: Maintenance, care and treatment of peri-implant infection                                                                                               | Chen S.; Darby I.                                                                                                                                     | 2003 |
| Rotational Panoramic Versus Intraoral Rectangular Radiographs for Evaluation of Peri-implant Bone Loss in the Anterior Atrophic Mandible                                 | Zechner W.; Watzek G.; Gahleitner A.; Busenlechner D.; Tepper G.; Watzek G.                                                                           | 2003 |
| Four-year Follow-up of Larger-Diameter Implants Placed in Fresh Extraction Sockets Using a Resorbable Membrane or a Resorbable Alloplastic Material                      | Prosper L.; Gherlone E.F.; Redaelli S.; Quaranta M.                                                                                                   | 2003 |
| Interventions for replacing missing teeth: different types of dental implants.                                                                                           | Esposito M.; Worthington H.V.; Thomsen P.; Coulthard P.                                                                                               | 2003 |
| Early loading of nonsubmerged titanium implants with a sandblasted and acid-etched (SLA) surface: 3-Year results of a prospective study in partially edentulous patients | Bornstein M.M.; Lussi A.; Schmid B.; Belser U.C.; Buser D.                                                                                            | 2003 |
| Early loading of endosseous implants in the augmented maxilla: A 1-year prospective study                                                                                | Raghoobar G.M.; Schoen P.; Meijer H.J.A.; Stellingsma K.; Vissink A.                                                                                  | 2003 |

|                                                                                                                                                                   |                                                                                                                            |      |
|-------------------------------------------------------------------------------------------------------------------------------------------------------------------|----------------------------------------------------------------------------------------------------------------------------|------|
| Gelatinase B is associated with peri-implant bone loss                                                                                                            | Ma J.; Kittl U.; Hanemaaijer R.; Teronen O.P.; Sorsa T.A.; Natah S.; Tensing E.-K.; Kontinen Y.T.                          | 2003 |
| Early Functional Loading of Unsplinted Roughened Surface Implants with Mandibular Overdentures 2 Weeks after Surgery                                              | Payne A.G.T.; Tawse-Smith A.; Thompson W.M.; Kumara R.                                                                     | 2003 |
| Histologic analysis of clinically retrieved immediately loaded titanium implants: A report of 11 cases                                                            | Degidi M.; Scarano A.; Petrone G.; Piattelli A.                                                                            | 2003 |
| Tissue reactions to abutment shift: An experimental study in dogs                                                                                                 | Abrahamsson I.; Berglundh T.; Sekino S.; Lindhe J.                                                                         | 2003 |
| Oral microbial biofilms and plaque-related diseases: microbial communities and their role in the shift from oral health to disease.                               | Sbordone L.; Bortolaia C.                                                                                                  | 2003 |
| Dental Implants in Reconstructed Jaws: Implant Longevity and Peri-Implant Tissue Outcomes                                                                         | Cheung L.K.; Leung A.C.F.                                                                                                  | 2003 |
| Implant Treatment in the Edentulous Mandible: A Prospective Study on Brånemark System Implants over More than 20 Years                                            | Ekelund J.-A.; Lindquist L.W.; Carlsson G.E.; Jemt T.                                                                      | 2003 |
| Abciximab Reduces Monocyte Tissue Factor in Carotid Angioplasty and Stenting                                                                                      | Kopp C.W.; Steiner S.; Nasel C.; Seidinger D.; Mlekusch I.; Lang W.; Bartok A.; Ahmadi R.; Minar E.                        | 2003 |
| Five-year clinical, microbiological, and radiological outcome following treatment of peri-implantitis in man                                                      | Leonhardt Å.; Dahlén G.; Renvert S.                                                                                        | 2003 |
| Extra-oral endosseous craniofacial implants: Current status and future developments                                                                               | Abu-Serriah M.M.; McGowan D.A.; Moos K.F.; Bagg J.                                                                         | 2003 |
| Dental implants in patients with type 2 diabetes mellitus: a clinical study.                                                                                      | Peled M.; Ardekian L.; Tagger-Green N.; Gutmacher Z.; Machtei E.E.                                                         | 2003 |
| Peri-implant mucosal level in patients treated with implant-supported fixed prostheses: A 1-year follow-up study                                                  | Ekfeldt A.; Eriksson A.; Johansson L.-Å.                                                                                   | 2003 |
| 3-year prospective multicenter study on one-stage implant surgery and early loading in the edentulous mandible.                                                   | Raghoobar G.M.; Friberg B.; Grunert I.; Hobkirk J.A.; Tepper G.; Wendelhag I.                                              | 2003 |
| Mandibulotomy and implant insertion                                                                                                                               | Schoen P.J.; Raghoobar G.M.; Vissink A.; Roodenburg J.L.N.                                                                 | 2003 |
| A clinical study on unfavorable cases of dental implant                                                                                                           | Noriko T.; Kento T.; Tsuneji O.; Motohiro M.; Kozue M.; Makoto S.; Shohei K.                                               | 2003 |
| Implant-retained mandibular overdentures with immediate loading: a 3- to 8-year prospective study on 328 implants.                                                | Chiapasco M.; Gatti C.                                                                                                     | 2003 |
| A prospective 5-year multicenter study of the cresco implantology concept                                                                                         | Helldén L.; Ericson G.; Elliot A.; Fornell J.; Holmgren K.; Nilner K.; Olsson C.O.                                         | 2003 |
| The current status of laser applications in dentistry                                                                                                             | Walsh L.J.                                                                                                                 | 2003 |
| Manipulation of the peri-implant tissue for better maintenance: a periodontal perspective.                                                                        | Maksoud M.A.                                                                                                               | 2003 |
| Influence of an Er:YAG laser on the surface structure of titanium implants                                                                                        | Schwarz F.; Rothamel D.; Becker J.                                                                                         | 2003 |
| A multidisciplinary approach to enhance implant esthetics: case report.                                                                                           | el Salam el Askary A.                                                                                                      | 2003 |
| The effects of tobacco use on oral health                                                                                                                         | Sham A.S.K.; Cheung L.K.; Jin L.J.; Corbet E.F.                                                                            | 2003 |
| Autogenous bone graft and ePTFE membrane in the treatment of peri-implantitis. I. Clinical and radiographic observations in cynomolgus monkeys.                   | Schou S.; Holmstrup P.; Jørgensen T.; Stoltze K.; Hjorting-Hansen E.; Wenzel A.                                            | 2003 |
| Clinical and radiographic evaluation of soft and hard tissue changes around implants: A pilot study                                                               | Joly J.C.; Martorelli de Lima A.F.; Carvalho da Silva R.                                                                   | 2003 |
| Implant surface preparation in the surgical treatment of experimental peri-implantitis with autogenous bone graft and ePTFE membrane in cynomolgus monkeys.       | Schou S.; Holmstrup P.; Jørgensen T.; Skovgaard L.T.; Stoltze K.; Hjorting-Hansen E.; Wenzel A.                            | 2003 |
| Understanding peri-implant endosseous healing.                                                                                                                    | Davies J.E.                                                                                                                | 2003 |
| Clinical complications with implants and implant prostheses.                                                                                                      | Goodacre C.J.; Bernal G.; Rungcharassaeng K.; Kan J.Y.                                                                     | 2003 |
| Differential diagnosis and treatment strategies for peri-implant diseases                                                                                         | Kozlovsky A.; Mozes O.; Nemcovsky C.E.; Artzi Z.                                                                           | 2003 |
| Bone-implant contact on machined and dual acid-etched surfaces after 2 months of healing in the human maxilla                                                     | Trisi P.; Lazzara R.; Rebaudi A.; Rao W.; Testori T.; Porter S.S.                                                          | 2003 |
| Mandibular fracture caused by peri-implant bone loss: Report of a case                                                                                            | Meijer H.J.A.; Raghoobar G.M.; Visser A.                                                                                   | 2003 |
| Long-term implant prognosis in patients with and without a history of chronic periodontitis: a 10-year prospective cohort study of the ITI Dental Implant System. | Karoussis I.K.; Salvi G.E.; Heitz-Mayfield L.J.; Brägger U.; Hämmerle C.H.; Lang N.P.                                      | 2003 |
| Treatment of peri-implant infections: a literature review.                                                                                                        | Roos-Jansåker A.M.; Renvert S.; Egelberg J.                                                                                | 2003 |
| Implant-supported fixed cantilever prostheses in partially edentulous arches. A seven-year prospective study.                                                     | Romeo E.; Lops D.; Margutti E.; Ghisolfi M.; Chiapasco M.; Vogel G.                                                        | 2003 |
| Clinical and radiologic evaluation of 2-stage IMZ implants placed in a single-stage procedure: 2-year results of a prospective comparative study.                 | Heydenrijk K.; Raghoobar G.M.; Meijer H.J.; Stegenga B.                                                                    | 2003 |
| Laminin-5 gamma2-chain and collagenase-2 (MMP-8) in human peri-implant sulcular fluid.                                                                            | Kivelä-Rajamäki M.J.; Teronen O.P.; Maisi P.; Husa V.; Tervahartiala T.I.; Pirilä E.M.; Salo T.A.; Mellanen L.; Sorsa T.A. | 2003 |
| Fixed bridgework rehabilitation of an edentulous mandible using different implant systems for superior results--review of the literature and a case report        | Koleran R.; Venezia E.                                                                                                     | 2003 |
| Imaging of periimplant bone levels of implants with buccal bone defects.                                                                                          | Schliephake H.; Wichmann M.; Donnerstag F.; Vogt S.                                                                        | 2003 |

|                                                                                                                                                                                                       |                                                                                                                                  |      |
|-------------------------------------------------------------------------------------------------------------------------------------------------------------------------------------------------------|----------------------------------------------------------------------------------------------------------------------------------|------|
| Trapezial arthroplasty with silicone rubber implantation for advanced osteoarthritis of the trapeziometacarpal joint of the thumb                                                                     | MacDermid J.C.; Roth J.H.; Raj Rampersaud Y.; Bain G.I.                                                                          | 2003 |
| Effect of intracrevicular restoration margins on peri-implant health: clinical, biochemical, and microbiologic findings around esthetic implants up to 9 years.                                       | Giannopoulou C.; Bernard J.P.; Buser D.; Carrel A.; Belser U.C.                                                                  | 2003 |
| Treatment of ligature-induced peri-implantitis by lethal photosensitization and guided bone regeneration: A preliminary histologic study in dogs                                                      | Shibli J.A.; Martins M.C.; Nociti Jr. F.H.; Garcia V.G.; Marcantonio Jr. E.                                                      | 2003 |
| Lethal photosensitization in microbiological treatment of ligature-induced peri-implantitis: a preliminary study in dogs.                                                                             | Shibli J.A.; Martins M.C.; Theodoro L.H.; Lotufo R.F.; Garcia V.G.; Marcantonio E.J.                                             | 2003 |
| Persistent acute inflammation at the implant-abutment interface.                                                                                                                                      | Broggini N.; McManus L.M.; Hermann J.S.; Medina R.U.; Oates T.W.; Schenk R.K.; Buser D.; Mellonig J.T.; Cochran D.L.             | 2003 |
| Management of peri-implantitis                                                                                                                                                                        | Triplett R.G.; Andrews J.A.; Hallmon W.W.                                                                                        | 2003 |
| Bucco-lingual bone remodeling around implants placed into immediate extraction sockets: A case series                                                                                                 | Covani U.; Cornellini R.; Barone A.                                                                                              | 2003 |
| Treatment of advanced periodontal destruction with immediately loaded implants and simultaneous bone augmentation: A case report                                                                      | Romanos G.E.                                                                                                                     | 2003 |
| Temperature changes induced by 809-nm GaAlAs laser at the implant-bone interface during simulated surface decontamination.                                                                            | Kreisler M.; Al Haj H.; D'Hoedt B.                                                                                               | 2003 |
| Soft tissue reaction to microgrooved poly-L-lactic acid implants loaded with transforming growth factor- $\beta$ 3                                                                                    | Parker J.A.T.C.; Walboomers X.F.; Von Den Hoff J.W.; Maltha J.C.; Jansen J.A.                                                    | 2003 |
| The use of a locking custom contoured blade plate for peri-articular nonunions                                                                                                                        | Harvey E.J.; Henley M.B.; Swiontkowski M.F.; Agel J.; Benirschke S.K.                                                            | 2003 |
| Immunohistochemical characteristics of inflammatory lesions at implants.                                                                                                                              | Gualini F.; Berglundh T.                                                                                                         | 2003 |
| Immediate placement and provisionalization of maxillary anterior single implants: 1-year prospective study.                                                                                           | Kan J.Y.; Rungcharassaeng K.; Lozada J.                                                                                          | 2003 |
| In vitro effects on rough implant surfaces of different instrumentations used in the surgical therapy of peri-implantitis                                                                             | Espedito Di Lauro A.; Morgese F.; Squillace A.; Ramaglia L.                                                                      | 2003 |
| Two-implant mandibular overdentures: simple to fabricate and easy to wear.                                                                                                                            | Klemetti E.; Chehade A.; Takanashi Y.; Feine J.S.                                                                                | 2003 |
| Influence of platelet-rich plasma on osseous healing of dental implants: a histologic and histomorphometric study in minipigs.                                                                        | Zechner W.; Tangl S.; Tepper G.; Fürst G.; Bernhart T.; Haas R.; Mailath G.; Watzek G.                                           | 2003 |
| Subantrosopic laterobasal sinus floor augmentation (SALSA): an up-to-5-year clinical study.                                                                                                           | Engelke W.; Schwarzwälder W.; Behnsen A.; Jacobs H.G.                                                                            | 2003 |
| Evaluation of distraction implants for prosthetic treatment after vertical alveolar ridge distraction: a clinical investigation.                                                                      | Feichtinger M.; Gaggl A.; Schultes G.; Kärcher H.                                                                                | 2003 |
| Collagen as an implantable material in medicine and dentistry.                                                                                                                                        | Patino M.G.; Neiders M.E.; Andreana S.; Noble B.; Cohen R.E.                                                                     | 2002 |
| Apical (retrograde) peri-implantitis: a case report of an active lesion.                                                                                                                              | Flanagan D.                                                                                                                      | 2002 |
| Osteocalcin, deoxypyridinoline and interleukin-1 $\beta$ in peri-implant crevicular fluid of patients with peri-implantitis.                                                                          | Murata M.; Tatsumi J.; Kato Y.; Suda S.; Nunokawa Y.; Kobayashi Y.; Takeda H.; Araki H.; Shin K.; Okuda K.; Miyata T.; Yoshie H. | 2002 |
| Healing after standardized clinical probing of the perimplant soft tissue seal: a histomorphometric study in dogs.                                                                                    | Etter T.H.; Håkanson I.; Lang N.P.; Trejo P.M.; Caffesse R.G.                                                                    | 2002 |
| A systematic review of the incidence of biological and technical complications in implant dentistry reported in prospective longitudinal studies of at least 5 years.                                 | Berglundh T.; Persson L.; Klinge B.                                                                                              | 2002 |
| Three-dimensional finite element analysis of implant stability in the atrophic posterior maxilla: a mathematical study of the sinus floor augmentation.                                               | Tepper G.; Haas R.; Zechner W.; Krach W.; Watzek G.                                                                              | 2002 |
| A systematic review of the survival of implants in bone sites augmented with barrier membranes (guided bone regeneration) in partially edentulous patients.                                           | Hämmerle C.H.; Jung R.E.; Feloutzis A.                                                                                           | 2002 |
| Immediate loading of Brånemark implants: a 24-month follow-up of a comparative prospective pilot study between mandibular overdentures supported by Conical transmucosal and standard MK II implants. | Gatti C.; Chiapasco M.                                                                                                           | 2002 |
| Nonsubmerged and submerged implants in the treatment of the partially edentulous maxilla.                                                                                                             | Astrand P.; Engquist B.; Anzén B.; Bergendal T.; Hallman M.; Karlsson U.; Kvint S.; Lysell L.; Rundcrantz T.                     | 2002 |
| Local administration of growth hormone enhances periimplant bone reaction in an osteoporotic rabbit model.                                                                                            | Tresguerres I.F.; Clemente C.; Donado M.; Gómez-Pellico L.; Blanco L.; Alobera M.A.; Tresguerres J.A.                            | 2002 |
| Conventional and early loading of unsplinted ITI implants supporting mandibular overdentures.                                                                                                         | Payne A.G.; Tawse-Smith A.; Duncan W.D.; Kumara R.                                                                               | 2002 |
| Diagnoses, clinical classification, and proposed treatment of spontaneous early exposure of submerged implants.                                                                                       | Barboza E.P.; Caúla A.L.                                                                                                         | 2002 |
| Artificial disc: Preliminary results of a prospective study in the United States                                                                                                                      | Hochschuler S.H.; Ohnmeiss D.D.; Guyer R.D.; Blumenthal S.L.                                                                     | 2002 |
| A 5-year longitudinal study of the clinical effectiveness of ITI solid-screw implants in the treatment of mandibular edentulism.                                                                      | Behneke A.; Behneke N.; d'Hoedt B.                                                                                               | 2002 |
| Microbiota around root-form endosseous implants: a review of the literature.                                                                                                                          | Heydenrijk K.; Meijer H.J.; van der Reijden W.A.; Raghoobar G.M.; Vissink A.; Stegenga B.                                        | 2002 |
| Temperature changes at the implant-bone interface during simulated surface decontamination with an Er:YAG laser.                                                                                      | Kreisler M.; Al Haj H.; d'Hoedt B.                                                                                               | 2002 |
| Clinical response to 2 different therapeutic regimens to treat peri-implant mucositis                                                                                                                 | Porrás R.; Anderson G.B.; Caffesse R.; Narendran S.; Trejo P.M.                                                                  | 2002 |

|                                                                                                                                                                                                                     |                                                                                                                     |      |
|---------------------------------------------------------------------------------------------------------------------------------------------------------------------------------------------------------------------|---------------------------------------------------------------------------------------------------------------------|------|
| Interleukin-1beta, tumor necrosis factor-alpha levels and neutrophil elastase activity in peri-implant crevicular fluid.                                                                                            | Ataoglu H.; Alptekin N.O.; Haliloglu S.; Gursel M.; Ataoglu T.; Serpek B.; Durmus E.                                | 2002 |
| Influence of the size of the microgap on crestal bone levels in non-submerged dental implants: A radiographic study in the canine mandible                                                                          | King G.N.; Hermann J.S.; Schoofield J.D.; Busen D.; Cochran D.L.                                                    | 2002 |
| Bone growth factors in maxillofacial skeletal reconstruction                                                                                                                                                        | Schliephake H.                                                                                                      | 2002 |
| Outcome of implant therapy in relation to experienced loss of periodontal bone support: a retrospective 5- year study.                                                                                              | Hardt C.R.; Gröndahl K.; Lekholm U.; Wennström J.L.                                                                 | 2002 |
| Peri-implant alveolar bone loss with respect to bone quality after use of the osteotome technique: results of a retrospective study.                                                                                | Strietzel F.P.; Nowak M.; Küchler I.; Friedmann A.                                                                  | 2002 |
| Implant-retained mandibular overdentures with ITI implants.                                                                                                                                                         | Romeo E.; Chiapasco M.; Lazza A.; Casentini P.; Ghisolfi M.; Iorio M.; Vogel G.                                     | 2002 |
| Invasive infection due to Penicillium species other than P. marneffeii                                                                                                                                              | Lyratzopoulos G.; Ellis M.; Nerringer R.; Denning D.W.                                                              | 2002 |
| Hip fracture surgery: Is the pre-operative American Society of Anesthesiologists (ASA) score a predictor of functional outcome?                                                                                     | Michel J.-P.; Klopfenstein C.; Hoffmeyer P.; Stern R.; Grab B.                                                      | 2002 |
| Dental implant treatment in diabetic patients.                                                                                                                                                                      | Farzad P.; Andersson L.; Nyberg J.                                                                                  | 2002 |
| Rehabilitation of a bulimic patient using endosteal implants.                                                                                                                                                       | Ambard A.; Muenninghoff L.                                                                                          | 2002 |
| Titanium deposition after peri-implant care with the carbon dioxide laser.                                                                                                                                          | Deppe H.; Greim H.; Brill T.; Wagenpfeil S.                                                                         | 2002 |
| A follow-up study of maxillary implants supporting an overdenture: clinical and radiographic results.                                                                                                               | Mericske-Stern R.; Oetterli M.; Kiener P.; Mericske E.                                                              | 2002 |
| Regeneration of an osseous peri-implantitis lesion.                                                                                                                                                                 | El Chaar E.S.; Jalbout Z.N.                                                                                         | 2002 |
| The single-tooth implant: A viable alternative for single-tooth replacement                                                                                                                                         | Mayer T.M.; Hawley C.E.; Gunsolley J.C.; Feldman S.                                                                 | 2002 |
| Two-stage IMZ implants and ITI implants inserted in a single-stage procedure. A prospective comparative study.                                                                                                      | Heydenrijk K.; Raghoobar G.M.; Meijer H.J.; van der Reijden W.A.; van Winkelhoff A.J.; Stegenga B.                  | 2002 |
| Non contrast computerized tomography and dynamic renal scintigraphy in the evaluation of patients with renal colic: Are both necessary?                                                                             | German I.; Lantsberg S.; Crystal P.; Assali M.; Rachinsky I.; Kaneti J.; Neulander E.Z.                             | 2002 |
| Interventions for replacing missing teeth: maintaining and re-establishing healthy tissues around dental implants.                                                                                                  | Esposito M.; Worthington H.V.; Coulthard P.; Jokstad A.                                                             | 2002 |
| Preliminary results of a phase I/II study of HDR brachytherapy alone for T1/T2 breast cancer                                                                                                                        | Wazer D.E.; Berle L.; Graham R.; Chung M.; Rothschild J.; Graves T.; Cady B.; Ulin K.; Ruthazer R.; DiPetrillo T.A. | 2002 |
| Crestal bone loss around submerged and exposed unloaded dental implants: a radiographic and microbiological descriptive study.                                                                                      | Barboza E.P.; Caúla A.L.; Carvalho W.R.                                                                             | 2002 |
| Expression of endothelial adhesion molecules in the alveolar ridge mucosa, gingiva and periimplant mucosa.                                                                                                          | Zitzmann N.U.; Berglundh T.; Marinello C.P.; Lindhe J.                                                              | 2002 |
| Microbiology and antimicrobial therapy of peri-implantitis.                                                                                                                                                         | Mombelli A.                                                                                                         | 2002 |
| The influence of controlled occlusal overload on peri-implant tissue. part 4: a histologic study in monkeys.                                                                                                        | Miyata T.; Kobayashi Y.; Araki H.; Ohto T.; Shin K.                                                                 | 2002 |
| The accuracy and reliability of radiographic methods for the assessment of marginal bone level around oral implants                                                                                                 | De Smet E.; Jacobs R.; Gijbels F.; Naert I.                                                                         | 2002 |
| Biofilms of the oral cavity. Formation, development and involvement in the onset of diseases related to bacterial plaque increase                                                                                   | Bortolaia C.; Sbordone L.                                                                                           | 2002 |
| The causes of early implant bone loss: Myth or science?                                                                                                                                                             | Oh T.-J.; Yoon J.; Misch C.E.; Wang H.-L.                                                                           | 2002 |
| Early loading of unsplinted implants supporting mandibular overdentures using a one-stage operative procedure with two different implant systems: a 2-year report.                                                  | Tawse-Smith A.; Payne A.G.; Kumara R.; Thomson W.M.                                                                 | 2002 |
| A review on peri-implant crevicular fluid assays potential in monitoring and predicting peri-implant tissue responses.                                                                                              | Kaklamanos E.G.; Tsalikis L.                                                                                        | 2002 |
| Long-term follow-up of osseointegrated titanium implants using clinical, radiographic and microbiological parameters.                                                                                               | Leonhardt A.; Gröndahl K.; Bergström C.; Lekholm U.                                                                 | 2002 |
| Clinical utility of a genetic susceptibility test for severe chronic periodontitis: a critical evaluation.                                                                                                          | Greenstein G.; Hart T.C.                                                                                            | 2002 |
| Treatment of the infected implant site using platelet-rich plasma.                                                                                                                                                  | Petrungaro P.S.                                                                                                     | 2002 |
| The use of reduced healing times on ITI implants with a sandblasted and acid-etched (SLA) surface: early results from clinical trials on ITI SLA implants.                                                          | Cochran D.L.; Buser D.; ten Bruggenkate C.M.; Weingart D.; Taylor T.M.; Bernard J.P.; Peters F.; Simpson J.P.       | 2002 |
| Long-term clinical effectiveness of oral implants in the treatment of partial edentulism. Seven-year life table analysis of a prospective study with ITI dental implants system used for single-tooth restorations. | Romeo E.; Chiapasco M.; Ghisolfi M.; Vogel G.                                                                       | 2002 |
| Peri-implant bone regeneration using recombinant human bone morphogenetic protein-2 in a canine model: a dose-response study.                                                                                       | Tatakis D.N.; Koh A.; Jin L.; Wozney J.M.; Rohrer M.D.; Wikesjö U.M.                                                | 2002 |
| Immediate implant placement and temporization in extraction and healing sites.                                                                                                                                      | Saadoun A.P.                                                                                                        | 2002 |
| Long-term stability of osseointegrated implants in augmented bone: a 5-year prospective study in partially edentulous patients.                                                                                     | Buser D.; Ingimarsson S.; Dula K.; Lussi A.; Hirt H.P.; Belser U.C.                                                 | 2002 |
| Stability of dental implants in microvascular osseous transplants                                                                                                                                                   | Schultes G.; Gaggl A.; Kärcher H.                                                                                   | 2002 |
| Flapless implant surgery: a 10-year clinical retrospective analysis.                                                                                                                                                | Campelo L.D.; Camara J.R.                                                                                           | 2002 |
| Patient selection for endosseous dental implants: oral and systemic considerations.                                                                                                                                 | Sugerman P.B.; Barber M.T.                                                                                          | 2002 |

|                                                                                                                                                                                      |                                                                                            |      |
|--------------------------------------------------------------------------------------------------------------------------------------------------------------------------------------|--------------------------------------------------------------------------------------------|------|
| Peri-implant tissue response of immediately loaded, threaded, HA-coated implants: 1-year results.                                                                                    | Rungcharassaeng K.; Lozada J.L.; Kan J.Y.; Kim J.S.; Campagni W.V.; Munoz C.A.             | 2002 |
| A long-term follow-up of 76 Brånemark single-tooth implants.                                                                                                                         | Haas R.; Polak C.; Fürhauser R.; Mailath-Pokorny G.; Dörtbudak O.; Watzek G.               | 2002 |
| Progressive bone adaptation of titanium implants during and after orthodontic load in humans.                                                                                        | Trisi P.; Rebaudi A.                                                                       | 2002 |
| Single-tooth replacement with the Frialit-2 system: a retrospective clinical analysis of 146 implants.                                                                               | Krennmair G.; Schmidinger S.; Waldenberger O.                                              | 2002 |
| Surgical therapy of peri-implant disease: A 3-year follow-up study of cases treated with 3 different techniques of bone regeneration                                                 | Khoury F.; Buchmann R.                                                                     | 2001 |
| Re-osseointegration after treatment of peri-implantitis at different implant surfaces. An experimental study in the dog.                                                             | Persson L.G.; Berglundh T.; Lindhe J.; Sennerby L.                                         | 2001 |
| One-stage operative procedure using two different implant systems: a prospective study on implant overdentures in the edentulous mandible.                                           | Tawse-Smith A.; Perio C.; Payne A.G.; Kumara R.; Thomson W.M.                              | 2001 |
| Orthodontic aspects of the use of oral implants in adolescents: a 10-year follow-up study.                                                                                           | Thilander B.; Odman J.; Lekholm U.                                                         | 2001 |
| Implant-supported denture in a patient with Huntington's disease: interdisciplinary aspects.                                                                                         | Jackowski J.; Andrich J.; Käppeler H.; Zöllner A.; Jöhren P.; Müller T.                    | 2001 |
| Implant-supported fixed prostheses for the rehabilitation of periodontally compromised dentitions: a 3-year prospective clinical study.                                              | Yi S.W.; Ericsson I.; Kim C.K.; Carlsson G.E.; Nilner K.                                   | 2001 |
| Influence of the size of the microgap on crestal bone changes around titanium implants. A histometric evaluation of unloaded non-submerged implants in the canine mandible           | Hermann J.S.; Schoolfield J.D.; Schenk R.K.; Buser D.; Cochran D.L.                        | 2001 |
| A multi-center study comparing dual acid-etched and machined-surfaced implants in various bone qualities                                                                             | Khang W.; Feldman S.; Hawley C.E.; Gunsolley J.                                            | 2001 |
| Abnormal echocardiography during weaning from cardiopulmonary bypass                                                                                                                 | Tolley P.M.; Martin R.R.                                                                   | 2001 |
| Predictable peri-implant gingival aesthetics: surgical and prosthodontic rationales.                                                                                                 | Kois J.C.; Kan J.Y.                                                                        | 2001 |
| A longitudinal study on mandibular implants supporting an overdenture: the influence of retention mechanism and anatomic-prosthetic variables on periimplant parameters.             | Oetterli M.; Kiener P.; Mericske-Stern R.                                                  | 2001 |
| Use of upper-lid blepharoplasty full-thickness skin for peri-implant keratinized tissue grafting: A report of 2 cases                                                                | Deeb G.R.; Le B.T.; Ueek B.A.; Dierks E.J.                                                 | 2001 |
| Connective tissue orientation around dental implants in a canine model.                                                                                                              | Comut A.A.; Weber H.P.; Shortkroff S.; Cui F.Z.; Spector M.                                | 2001 |
| Evaluation following functional loading of titanium fixtures placed in ridges augmented by deproteinized bone mineral. A human case study.                                           | Mayfield L.J.; Skoglund A.; Hising P.; Lang N.P.; Attström R.                              | 2001 |
| Brånemark System and ITI Dental Implant System for treatment of mandibular edentulism. A comparative randomized study: 3-year follow-up.                                             | Moberg L.E.; Köndell P.A.; Sagulin G.B.; Bolin A.; Heimdahl A.; Gynther G.W.               | 2001 |
| Effect of total body irradiation on peri-implant tissue reaction: an experimental study.                                                                                             | Renou S.J.; Guglielmotti M.B.; de la Torre A.; Cabrini R.L.                                | 2001 |
| Absorbable versus nonabsorbable membranes and bone grafts in the treatment of ligature-induced peri-implantitis defects in dogs: a histometric investigation.                        | Nociti Jr. F.H.; Machado M.A.; Stefani C.M.; Sallum E.A.                                   | 2001 |
| A prospective study of treatment of severely resorbed maxillae with narrow nonsubmerged implants: results after 1 year of loading.                                                   | Hallman M.                                                                                 | 2001 |
| The effect of dental implant spacing on peri-implant bone using the rabbit ( <i>Oryctolagus cuniculus</i> ) tibia model.                                                             | Hatley C.L.; Cameron S.M.; Cuenin M.F.; Parker M.H.; Thompson S.H.; Harvey S.B.            | 2001 |
| Alumina ceramic implant abutments used for single-tooth replacement: a prospective 1- to 3-year multicenter study.                                                                   | Andersson B.; Taylor A.; Lang B.R.; Scheller H.; Schärer P.; Sorensen J.A.; Tarnow D.      | 2001 |
| Stability of dental implants in microvascular scapula and iliac crest transplants                                                                                                    | Gaggl A.; Schultes G.; Kärcher H.                                                          | 2001 |
| Per-implant care of ailing implants with the carbon dioxide laser.                                                                                                                   | Deppe H.; Horch H.H.; Henke J.; Donath K.                                                  | 2001 |
| Transmission electron microscopy of intracellular particles of polyethylene from joint replacement prostheses: Size distribution and cellular response                               | Benz E.B.; Federman M.; Godleski J.J.; Bierbaum B.E.; Thornhill T.S.; Spector M.           | 2001 |
| Incidence and primary prevention of complications related to the placement of dental implants                                                                                        | Torelli S.; Bercy P.                                                                       | 2001 |
| Clinical and microbiological evaluation of ligature-induced peri-implantitis and periodontitis in dogs.                                                                              | Nociti Jr. F.H.; Cesco De Toledo R.; Machado M.A.; Stefani C.M.; Line S.R.; Gonçalves R.B. | 2001 |
| The influence of plaque and/or excessive loading on marginal soft and hard tissue reactions around Brånemark implants: a review of literature and experience.                        | De Smet E.; van Steenberghe D.; Quirynen M.; Naert I.                                      | 2001 |
| Osseointegrated implants in patients treated for generalized chronic periodontitis and generalized aggressive periodontitis: 3- and 5-year results of a prospective long-term study. | Mengel R.; Schröder T.; Flores-de-Jacoby L.                                                | 2001 |
| Clinical evaluation and prosthetic complications of single tooth replacements by non-submerged implants.                                                                             | Mericske-Stern R.; Grütter L.; Rösch R.; Mericske E.                                       | 2001 |
| Retrospective analysis of the influence of abutment structure design on the success of implant unit. A 3-year controlled follow-up study.                                            | Bambini F.; Lo Muzio L.; Procaccini M.                                                     | 2001 |
| Nonsubmerged implants in the treatment of the edentulous lower jaw: a 5-year prospective longitudinal study of ITI hollow screws.                                                    | Hellem S.; Karlsson U.; Almfeldt I.; Brunell G.; Hamp S.E.; Astrand P.                     | 2001 |
| One-year prospective evaluation of the early loading of unsplinted conical Brånemark fixtures with mandibular overdentures immediately following surgery.                            | Payne A.G.; Tawse-Smith A.; Kumara R.; Thomson W.M.                                        | 2001 |

|                                                                                                                                                                |                                                                                                               |      |
|----------------------------------------------------------------------------------------------------------------------------------------------------------------|---------------------------------------------------------------------------------------------------------------|------|
| Treatment of peri-implant defects with the vertical ridge augmentation procedure: a patient report.                                                            | Tinti C.; Parma-Benfenati S.                                                                                  | 2001 |
| Crestal bone changes around titanium implants: a methodologic study comparing linear radiographic with histometric measurements.                               | Hermann J.S.; Schoolfield J.D.; Nummikoski P.V.; Buser D.; Schenk R.K.; Cochran D.L.                          | 2001 |
| Five-year prospective follow-up report of the Astra tech standard dental implant in clinical treatment.                                                        | Weibrich G.; Buch R.S.; Wegener J.; Wagner W.                                                                 | 2001 |
| Influence of patient age on the success rate of dental implants supporting an overdenture in an edentulous mandible: a 3-year prospective study.               | Meijer H.J.; Batenburg R.H.; Raghoobar G.M.                                                                   | 2001 |
| Implant-retained mandibular overdentures with Brånemark System MKII implants: a prospective comparative study between delayed and immediate loading.           | Chiapasco M.; Abati S.; Romeo E.; Vogel G.                                                                    | 2001 |
| Spontaneous early exposure of submerged endosseous implants resulting in crestal bone loss: a clinical evaluation between stage I and stage II surgery.        | Tal H.; Artzi Z.; Moses O.; Nemcovsky C.E.; Kozlovsky A.                                                      | 2001 |
| Immediate postextraction implant placement with root-analog stepped implants: surgical procedure and statistical outcome after 6 years.                        | Gomez-Roman G.; Kruppenbacher M.; Weber H.; Schulte W.                                                        | 2001 |
| Tooth-implant supported fixed prostheses: a retrospective multicenter study.                                                                                   | Lindh T.; Dahlgren S.; Gunnarsson K.; Josefsson T.; Nilson H.; Wilhelmsson P.; Gunne J.                       | 2001 |
| Retrospective assessment of clinical and microbiological factors affecting periimplant tissue conditions.                                                      | Rutar A.; Lang N.P.; Buser D.; Bürgin W.; Mombelli A.                                                         | 2001 |
| General and oral aspects of osteoporosis: a review.                                                                                                            | von Wörm N.                                                                                                   | 2001 |
| Long-term evaluation of non-submerged hollow cylinder implants. Clinical and radiographic results.                                                             | Merckse-Stern R.; Aerni D.; Geering A.H.; Buser D.                                                            | 2001 |
| Glycosaminoglycans in peri-implant sulcus fluid from implants placed in sinus-inlay bone grafts.                                                               | Johansson B.; Smedberg J.I.; Langley M.; Embery G.                                                            | 2001 |
| Vascular endothelial growth factor and microvessel density around healthy and failing dental implants.                                                         | Cornelini R.; Artese L.; Rubini C.; Fioroni M.; Ferrero G.; Santinelli A.; Piattelli A.                       | 2001 |
| Development and treatment of retrograde peri-implantitis involving a site with a history of failed endodontic and apicoectomy procedures: a series of reports. | Ayango L.; Sheridan P.J.                                                                                      | 2001 |
| Long-term results of implants treated with guided bone regeneration: a 5-year prospective study.                                                               | Zitzmann N.U.; Schärer P.; Marinello C.P.                                                                     | 2001 |
| Bone and soft tissue integration to titanium implants with different surface topography: an experimental study in the dog.                                     | Abrahamsson I.; Zitzmann N.U.; Berglundh T.; Wennerberg A.; Lindhe J.                                         | 2001 |
| A clinical and histological evaluation of titanium mini-implants as anchors for orthodontic intrusion in the beagle dog.                                       | Ohmae M.; Saito S.; Morohashi T.; Seki K.; Qu H.; Kanomi R.; Yamasaki K.I.; Okano T.; Yamada S.; Shibasaki Y. | 2001 |
| Augmentation of alveolar bone and dental implant osseointegration: clinical implications of studies with rhBMP-2.                                              | Wikesjö U.M.; Sorensen R.G.; Wozney J.M.                                                                      | 2001 |
| Long-term performance of Osseotite implants: a 6-year clinical follow-up.                                                                                      | Sullivan D.Y.; Sherwood R.L.; Porter S.S.                                                                     | 2001 |
| Reproducibility of peri-implant probing using a force-controlled probe.                                                                                        | Eickholz P.; Grotkamp F.L.; Steveling H.; Mühling J.; Staehle H.J.                                            | 2001 |
| Bisphosphonate inhibits alveolar bone resorption in experimentally-induced peri-implantitis in dogs.                                                           | Shibutani T.; Inuduka A.; Horiki I.; Luan Q.; Iwayama Y.                                                      | 2001 |
| Inter-abutment and peri-abutment mucosal enlargement with mandibular implant overdentures.                                                                     | Payne A.G.; Solomons Y.F.; Tawse-Smith A.; Lownie J.F.                                                        | 2001 |
| CrossLaps and beta-glucuronidase in peri-implant and gingival crevicular fluid.                                                                                | Schubert U.; Kleber B.M.; Strietzel F.P.; Dörfling P.                                                         | 2001 |
| The implant periapical lesion: four case reports and review of the literature.                                                                                 | Jalbout Z.N.; Tarnow D.P.                                                                                     | 2001 |
| Osseointegration following treatment of peri-implantitis and replacement of implant components. An experimental study in the dog.                              | Persson L.G.; Ericsson I.; Berglundh T.; Lindhe J.                                                            | 2001 |
| Maxillary overdentures retained by splinted and unsplinted implants: a retrospective study.                                                                    | Närhi T.O.; Hevinga M.; Voorsmit R.A.; Kalk W.                                                                | 2001 |
| Effectiveness of maxillary overdentures supported by implants: maintenance and prosthetic complications.                                                       | Kiener P.; Oetterli M.; Mericske E.; Mericske-Stern R.                                                        | 2001 |
| Biological and technical complications and failures with fixed partial dentures (FPD) on implants and teeth after four to five years of function.              | Brägger U.; Aeschlimann S.; Bürgin W.; Hammerle C.H.; Lang N.P.                                               | 2001 |
| Single stage surgery combining transmucosal implant placement with guided bone regeneration and bioresorbable materials.                                       | Hammerle C.H.; Lang N.P.                                                                                      | 2001 |
| The influences of molar intrusion on the inferior alveolar neurovascular bundle and root using the skeletal anchorage system in dogs.                          | Daimaruya T.; Nagasaka H.; Umemori M.; Sugawara J.; Mitani H.                                                 | 2001 |
| Rehabilitation of patients with severely resorbed maxillae by means of implants with or without bone grafts: a 3- to 5-year follow-up clinical report.         | Widmark G.; Andersson B.; Carlsson G.E.; Lindvall A.M.; Ivanoff C.J.                                          | 2001 |
| Clinical and radiographic evaluation of 108 dental implants after 1-year loading                                                                               | Tang Z.; Sha Y.; Lin Y.                                                                                       | 2001 |
| Vertical distraction osteogenesis of edentulous ridges for improvement of oral implant positioning: a clinical report of preliminary results.                  | Chiapasco M.; Romeo E.; Vogel G.                                                                              | 2001 |
| Periodontal-type measurements associated with hydroxyapatite-coated and non-HA-coated implants: uncovering to 36 months.                                       | Morris H.F.; Ochi S.; Spray J.R.; Olson J.W.                                                                  | 2000 |
| A clinical, radiographic, and microbiologic comparison of Astra Tech and Brånemark single tooth implants.                                                      | Puchades-Roman L.; Palmer R.M.; Palmer P.J.; Howe L.C.; Ide M.; Wilson R.F.                                   | 2000 |
| Nonsubmerged implants in the treatment of the edentulous upper jaw: a prospective clinical and radiographic study of ITI implants--results after 1 year.       | Astrand P.; Anzén B.; Karlsson U.; Sahlholm S.; Svärdröm P.; Hellem S.                                        | 2000 |



|                                                                                                                                                                                     |                                                                                                                |      |
|-------------------------------------------------------------------------------------------------------------------------------------------------------------------------------------|----------------------------------------------------------------------------------------------------------------|------|
| Diagnostic characteristics of clinical and microbiological tests for monitoring periodontal and peri-implant mucosal tissue conditions during supportive periodontal therapy (SPT). | Luterbacher S.; Mayfield L.; Brägger U.; Lang N.P.                                                             | 2000 |
| The influence of smoking on 3-year clinical success of osseointegrated dental implants.                                                                                             | Lambert P.M.; Morris H.F.; Ochi S.                                                                             | 2000 |
| Biological complications with dental implants: their prevention, diagnosis and treatment.                                                                                           | Lang N.P.; Wilson T.G.; Corbet E.F.                                                                            | 2000 |
| Surgical procedures in partially edentulous patients with ITI implants.                                                                                                             | Buser D.; von Arx T.                                                                                           | 2000 |
| Marginal bone level around implants assessed in digital and film radiographs: in vivo study in the dog.                                                                             | Borg E.; Gröndahl K.; Persson L.G.; Gröndahl H.G.                                                              | 2000 |
| Factors associated with radiographic vertical bone loss around implants placed in a clinical study.                                                                                 | Manz M.C.                                                                                                      | 2000 |
| Histopathologic observations on late oral implant failures.                                                                                                                         | Esposito M.; Thomsen P.; Ericson L.E.; Sennerby L.; Lekholm U.                                                 | 2000 |
| Re-establishment of the atomic composition and the oxide structure of contaminated titanium surfaces by means of carbon dioxide laser and hydrogen peroxide: an in vitro study.     | Mouhyi J.; Sennerby L.; Wennerberg A.; Louette P.; Dourov N.; van Reek J.                                      | 2000 |
| Clinical outcomes of three Parkinson's disease patients treated with mandibular implant overdentures.                                                                               | Heckmann S.M.; Heckmann J.G.; Weber H.P.                                                                       | 2000 |
| Implant-supported overdenture therapy: a 3- to 8-year prospective study.                                                                                                            | Inan O.; Aykent F.; Alptekin N.                                                                                | 2000 |
| Conventional versus laser-assisted therapy of periimplantitis: a five-year comparative study.                                                                                       | Bach G.; Neckel C.; Mall C.; Krekeler G.                                                                       | 2000 |
| Experimental study of Ti-75(AlMoZrTi alloy) dental implants in dog mandible                                                                                                         | Tao C.Z.; Zhou J.; Cheng B.S.; Liu Y.; Hao L.                                                                  | 2000 |
| Influence of the prosthetic restoration modality on bone loss around dental implants placed in vascularized iliac bone grafts for mandibular reconstruction                         | Kovács A.F.                                                                                                    | 2000 |
| Combined periodontal treatment with dental implants                                                                                                                                 | van der Avoort P.G.; Hosman H.J.; van Waas M.A.                                                                | 2000 |
| Apical-coronal implant position: recent surgical proposals. Technical note.                                                                                                         | Davarpanah M.; Martinez H.; Tecucianu J.F.                                                                     | 2000 |
| Does surgical prophylaxis with teicoplanin constitute a therapeutic advance?                                                                                                        | Mini E.; Nobili S.; Periti P.                                                                                  | 2000 |
| Tissue inhibitor of metalloproteinases-1, matrix metalloproteinases-1 and -8, and collagenase activity levels in peri-implant crevicular fluid after implantation.                  | Nomura T.; Ishii A.; Shimizu H.; Taguchi N.; Yoshie H.; Kusakari H.; Hara K.                                   | 2000 |
| The longitudinal clinical effectiveness of ITI solid-screw implants in partially edentulous patients: a 5-year follow-up report.                                                    | Behneke A.; Behneke N.; d'Hoedt B.                                                                             | 2000 |
| Treatment of ligature-induced peri-implantitis defects by regenerative procedures. Part II: A histometric study in dogs.                                                            | Machado M.A.; Stefani C.M.; Sallum E.A.; Sallum A.W.; Tramontina V.A.; Nogueira-Filho G.R.; Nociti Júnior F.H. | 2000 |
| Peri-implant mucosal inflammation and bone loss: clinical and radiographic evaluation of 108 dental implants after 1-year loading.                                                  | Tang Z.; Sha Y.; Lin Y.; Zhang G.; Wang X.; Cao C.                                                             | 2000 |
| Long-term evaluation of osseointegrated implants in regenerated and nonregenerated bone.                                                                                            | Corrente G.; Abundo R.; Cardaropoli D.; Cardaropoli G.; Martuscelli G.                                         | 2000 |
| Patient perception of local anesthesia for prostate brachytherapy                                                                                                                   | Smathers S.; Wallner K.; Simpson C.; Roof J.                                                                   | 2000 |
| Correlation of peri-implant health and aspartate aminotransferase levels: a cross-sectional clinical study.                                                                         | Fiorellini J.P.; Nevins M.L.; Sekler J.; Chung A.; Oringer R.J.                                                | 2000 |
| Aspartate aminotransferase activity in crevicular fluid from dental implants.                                                                                                       | Paolantonio M.; Di Placido G.; Tumini V.; Di Stilio M.; Contento A.; Spoto G.                                  | 2000 |
| Experimentally induced peri-implantitis: a review of different treatment methods described in the literature.                                                                       | Baron M.; Haas R.; Dörtbudak O.; Watzek G.                                                                     | 2000 |
| Actinobacillus actinomycetemcomitans-associated peri-implantitis in an edentulous patient. A case report.                                                                           | van Winkelhoff A.J.; Wolf J.W.                                                                                 | 2000 |
| A one-year study on enzyme level in gingival crevicular fluid around osseointegrated dental implants                                                                                | Li X.; Sha Y.; Cao C.                                                                                          | 2000 |
| Soft tissue management in oral implantology: a review of surgical techniques for shaping an esthetic and functional peri-implant soft tissue structure.                             | Khoury F.; Happe A.                                                                                            | 2000 |
| Long-term marginal periimplant bone loss in edentulous patients.                                                                                                                    | Carlsson G.E.; Lindquist L.W.; Jemt T.                                                                         | 2000 |
| Retrospective analysis of Frialit-2 implants in the augmented sinus.                                                                                                                | Lorenzoni M.; Pertl C.; Wegscheider W.; Keil C.; Penkner K.; Polansky R.; Bratschko R.O.                       | 2000 |
| Lethal photosensitization, autogenous bone, and e-PTFE membrane for the treatment of peri-implantitis: preliminary results.                                                         | Haas R.; Baron M.; Dörtbudak O.; Watzek G.                                                                     | 2000 |
| The influence of controlled occlusal overload on peri-implant tissue. Part 3: A histologic study in monkeys.                                                                        | Miyata T.; Kobayashi Y.; Araki H.; Ohto T.; Shin K.                                                            | 2000 |
| Use of short endosseous implants and an overdenture in the extremely resorbed mandible: A five-year retrospective study                                                             | Stellingsma C.; Meijer H.J.A.; Raghoobar G.M.                                                                  | 2000 |
| A 5-year prospective clinical and radiographic study of non-submerged dental implants.                                                                                              | Weber H.P.; Crohin C.C.; Fiorellini J.P.                                                                       | 2000 |
| Peri-implant infections.                                                                                                                                                            | Clarizio L.F.                                                                                                  | 2000 |
| Implant-supported mandibular overdentures retained with ball or bar attachments: a randomized prospective 5-year study.                                                             | Gotfredsen K.; Holm B.                                                                                         | 2000 |
| The fate of osseointegrated implants in patients following oral cancer surgery and mandibular reconstruction                                                                        | Kovács A.F.                                                                                                    | 2000 |

|                                                                                                                                            |                                                                                             |      |
|--------------------------------------------------------------------------------------------------------------------------------------------|---------------------------------------------------------------------------------------------|------|
| Implants in partially edentulous patients with history of periodontal disease                                                              | Barone A.; Porzio M.; Ramaglia L.; Sbordone L.                                              | 2000 |
| Treatment of peri-implantitis defects with autogenous bone grafts: six-month to 3-year results of a prospective study in 17 patients.      | Behneke A.; Behneke N.; d'Hoedt B.                                                          | 2000 |
| The efficacy of a counter-rotational powered toothbrush in the maintenance of endosseous dental implants.                                  | Truhlar R.S.; Morris H.F.; Ochi S.                                                          | 2000 |
| Treatment of ligature-induced peri-implantitis defects by regenerative procedures: a clinical study in dogs.                               | Machado M.A.; Stefani C.M.; Sallum E.A.; Sallum A.W.; Tramontina V.A.; Nociti Júnior F.H.   | 1999 |
| A ten-year clinical follow-up study of prosthetic rehabilitation of the edentulous lower jaw with endosteal dental implants                | Vajdovich I.; Fazekas A.                                                                    | 1999 |
| Osseointegrated implant failures.                                                                                                          | O'Mahony A.; Spencer P.                                                                     | 1999 |
| Longitudinal study of dental implants in a periodontally compromised population.                                                           | Sbordone L.; Barone A.; Ciaglia R.N.; Ramaglia L.; Iacono V.J.                              | 1999 |
| Microbial findings at failing implants.                                                                                                    | Leonhardt A.; Renvert S.; Dahlén G.                                                         | 1999 |
| The barrier between the keratinized mucosa and the dental implant. An experimental study in the dog.                                       | Moon I.S.; Berglundh T.; Abrahamsson I.; Linder E.; Lindhe J.                               | 1999 |
| Qualitative analysis of peripheral peri-implant bone and influence of alendronate sodium on early bone regeneration                        | Meraw S.J.; Reeve C.M.                                                                      | 1999 |
| Clinical and radiographic evaluation of early loaded free-standing dental implants with various coatings in beagle dogs.                   | Corso M.; Sirota C.; Fiorellini J.; Rasool F.; Szmukler-Moncler S.; Weber H.P.              | 1999 |
| Bone tissue reaction around implants placed in a compromised jaw.                                                                          | Carmagnola D.; Araújo M.; Berglundh T.; Albrektsson T.; Lindhe J.                           | 1999 |
| Ramus hinges for excessive movements of the condyles: a new dimension in mandibular tripodal subperiosteal implants.                       | Linkow L.I.; Ghalili R.                                                                     | 1999 |
| Prevention of bacterial leakage into and from prefabricated screw-retained crowns on implants in vitro.                                    | Besimo C.E.; Guindy J.S.; Lewettag D.; Meyer J.                                             | 1999 |
| Local anesthesia for prostate brachytherapy                                                                                                | Wallner K.; Simpson C.; Roof J.; Arthurs S.; Korssjoen T.; Sutlief S.                       | 1999 |
| In vitro response of human fibroblasts to commercially pure titanium                                                                       | Mostardi R.A.; Meerbaum S.O.; Kovacic M.W.; Gradisar Jr. I.A.                               | 1999 |
| Standardization of radiographs for mandibular implant-supported overdentures: review and innovation.                                       | Payne A.G.; Solomons Y.F.; Lownie J.F.                                                      | 1999 |
| Treatment of a patient with severe osteoporosis and chronic polyarthritis with fixed implant-supported prosthesis: a case report.          | Eder A.; Watzek G.                                                                          | 1999 |
| Ceramic implant abutments used for short-span fixed partial dentures: a prospective 2-year multicenter study.                              | Andersson B.; Schärer P.; Simion M.; Bergström C.                                           | 1999 |
| Peri-implant tissue health in reconstructed atrophic maxillae--report of 88 patients and 470 implants.                                     | Kaptein M.L.; De Lange G.L.; Blijdorp P.A.                                                  | 1999 |
| Influence of inflammatory reactions vs. occlusal loading on peri-implant marginal bone level.                                              | van Steenberghe D.; Naert I.; Jacobs R.; Quirynen M.                                        | 1999 |
| Peri-implant tissue response to pathological insults.                                                                                      | Jovanovic S.A.                                                                              | 1999 |
| Resolution of peri-implantitis following treatment. An experimental study in the dog.                                                      | Persson L.G.; Araújo M.G.; Berglundh T.; Gröndahl K.; Lindhe J.                             | 1999 |
| Longitudinal peri-implant clinical responses in anterior mandibles of female patients: a preliminary report.                               | Ow R.K.; Zarb G.A.; Schmitt A.                                                              | 1999 |
| In vitro models of biological responses to implant microbiological models.                                                                 | Mombelli A.                                                                                 | 1999 |
| Longitudinal evaluation of aspartate aminotransferase in the crevicular fluid of implants with bone loss and signs of progressive disease. | Rühling A.; Jepsen S.; Kocher T.; Plagmann H.C.                                             | 1999 |
| Oral rehabilitation of tumor patients with endosseous implants. Implant success with special reference to peri-implant tissue              | Betz T.; Purps S.; Pistner H.; Bill J.; Reuther J.                                          | 1999 |
| Prognosis and prognostic factors of endosseous implants in the irradiated jaw                                                              | Grötz K.A.; Wahlmann U.W.; Krummenauer F.; Wegener J.; al-Nawas B.; Kuffner H.D.; Wagner W. | 1999 |
| Osseointegration of rough acid-etched titanium implants: 5-year follow-up of 100 minimatic implants.                                       | De Leonardis D.; Garg A.K.; Pecora G.E.                                                     | 1999 |
| Synthetic bone grafts in peri-implant bone dehiscences: histological results in humans.                                                    | Passi P.; Girardello G.; Piattelli A.; Scarano A.                                           | 1999 |
| Comparative studies of Brånemark implants in the irradiated and not irradiated mandible                                                    | Esser E.; Neukirchen S.; Wagner W.                                                          | 1999 |
| Horse shoe Le Fort I osteotomy. Surgical technique for reconstruction of the extremely atrophied maxilla                                   | Gössweiner S.; Watzinger F.; Ewers R.                                                       | 1999 |
| Clinical outcome of Screw Vent implants. A 7-year prospective follow-up study.                                                             | De Bruyn H.; Collaert B.; Lindén U.; Johansson C.; Albrektsson T.                           | 1999 |
| Five- to six-year results of a prospective clinical trial using the ENDOPORE dental implant and a mandibular overdenture.                  | Deporter D.; Watson P.; Pharoah M.; Levy D.; Todescan R.                                    | 1999 |
| Attempts to obtain re-osseointegration following experimental peri-implantitis in dogs.                                                    | Wetzel A.C.; Vlassis J.; Caffesse R.G.; Hämmerle C.H.; Lang N.P.                            | 1999 |
| Peri-implant conditions in periodontally compromised patients following maxillary sinus augmentation. A long-term post-therapy trial.      | Buchmann R.; Khoury F.; Faust C.; Lange D.E.                                                | 1999 |
| A radiographic evaluation of bone healing around submerged and non-submerged dental implants in beagle dogs.                               | Fiorellini J.P.; Buser D.; Paquette D.W.; Williams R.C.; Haghighi D.; Weber H.P.            | 1999 |
| Microbiota of successful osseointegrated dental implants.                                                                                  | Lee K.H.; Maiden M.F.; Tanner A.C.; Weber H.P.                                              | 1999 |
| Recombinant human bone morphogenetic protein-2 stimulation of bone formation around endosseous dental implants.                            | Cochran D.L.; Schenk R.; Buser D.; Wozney J.M.; Jones A.A.                                  | 1999 |

|                                                                                                                                                                   |                                                                                                                                  |      |
|-------------------------------------------------------------------------------------------------------------------------------------------------------------------|----------------------------------------------------------------------------------------------------------------------------------|------|
| Preventive periimplant protocol.                                                                                                                                  | Eskow R.N.; Smith V.S.                                                                                                           | 1999 |
| Use of alendronate in peri-implant defect regeneration                                                                                                            | Meraw S.J.; Reeve C.M.; Wollan P.C.                                                                                              | 1999 |
| Scientific basis of a matrix metalloproteinase-8 specific chair-side test for monitoring periodontal and peri-implant health and disease                          | Sorsa T.; Mäntylä P.; Rönkä H.; Kallio P.; Kallis G.-B.; Lundqvist C.; Kinane D.F.; Salo T.; Golub L.M.; Teronen O.; Tikanoja S. | 1999 |
| C-telopeptide pyridinoline cross-links (ICTP) and periodontal pathogens associated with endosseous oral implants.                                                 | Oringer R.J.; Palys M.D.; Iranmanesh A.; Fiorellini J.P.; Haffajee A.D.; Socransky S.S.; Giannobile W.V.                         | 1998 |
| Bactericidal efficacy of carbon dioxide laser against bacteria-contaminated titanium implant and subsequent cellular adhesion to irradiated area                  | Kato T.; Kusakari H.; Hoshino E.                                                                                                 | 1998 |
| Mandibular overdentures supported by two Brånemark, IMZ or ITI implants. A prospective comparative preliminary study: one-year results.                           | Batenburg R.H.; Meijer H.J.; Raghoobar G.M.; Van Oort R.P.; Boering G.                                                           | 1998 |
| Treatment of patients with extreme maxillary atrophy using sinus floor augmentation and implants: preliminary results.                                            | Watzek G.; Weber R.; Bernhart T.; Ulm C.; Haas R.                                                                                | 1998 |
| Clinical and microbiologic effects of chemical versus mechanical cleansing in professional supportive implant therapy.                                            | Strooker H.; Rohn S.; Van Winkelhoff A.J.                                                                                        | 1998 |
| Biologic width and its relation to periodontal biotypes.                                                                                                          | Sanavi F.; Weisgold A.S.; Rose L.F.                                                                                              | 1998 |
| Implants: success and failure--a literature review.                                                                                                               | Koutsonikos A.                                                                                                                   | 1998 |
| Microbial colonization of the peri-implant environment and its relevance to long-term success of osseointegrated implants.                                        | Ellen R.P.                                                                                                                       | 1998 |
| The mucosal attachment at different abutments. An experimental study in dogs.                                                                                     | Abrahamsson I.; Berglundh T.; Glantz P.O.; Lindhe J.                                                                             | 1998 |
| Failure of oral implants: aetiology, symptoms and influencing factors.                                                                                            | Duyck J.; Naert I.                                                                                                               | 1998 |
| The implant-mucosal interface and its role in the long-term success of endosseous oral implants: a review of the literature.                                      | Koka S.                                                                                                                          | 1998 |
| Do healing abutments influence the outcome of implant treatment? A three-year multicenter study.                                                                  | Watson R.; Marinello C.; Kjellman O.; Rundcrantz T.; Fåhræus J.; Lithner B.                                                      | 1998 |
| Peri-implantitis.                                                                                                                                                 | Forna N.; Burlui V.; Luca I.C.; Indrei A.                                                                                        | 1998 |
| Successful bone formation at immediate transmucosal implants: a clinical report.                                                                                  | Hämmerle C.H.; Brägger U.; Schmid B.; Lang N.P.                                                                                  | 1998 |
| The effect of different transplanted soft tissues on bone resorption around loaded endosseous implants in patients after oral tumor surgery.                      | Kovács A.                                                                                                                        | 1998 |
| Rehabilitation of patients with severely resorbed maxillae by means of implants with or without bone grafts. A 1-year follow-up study.                            | Widmark G.; Andersson B.; Andrup B.; Carlsson G.E.; Ivanoff C.J.; Lindvall A.M.                                                  | 1998 |
| Biological factors contributing to failures of osseointegrated oral implants. (II). Etiopathogenesis.                                                             | Esposito M.; Hirsch J.M.; Lekholm U.; Thomsen P.                                                                                 | 1998 |
| A 5-year randomized clinical trial on the influence of splinted and unsplinted oral implants in the mandibular overdenture therapy. Part I: Peri-implant outcome. | Naert I.; Gizani S.; Vuylsteke M.; van Steenberghe D.                                                                            | 1998 |
| The diagnosis and treatment of peri-implantitis.                                                                                                                  | Mombelli A.; Lang N.P.                                                                                                           | 1998 |
| The EsthetiCone abutment: three-year results of a prospective multicenter investigation.                                                                          | Kastenbaum F.; Lewis S.; Naert I.; Palmquist C.                                                                                  | 1998 |
| Cemented single crowns on osseointegrated implants after 5 years: results from a prospective study on CeraOne.                                                    | Andersson B.; Odman P.; Lindvall A.M.; Brånemark P.I.                                                                            | 1998 |
| Nonhormonal alternatives to treating menopausal symptoms                                                                                                          | Cass I.; Runowicz C.D.                                                                                                           | 1998 |
| A retrospective multicenter evaluation of single tooth implant experience at three centers in the United Kingdom.                                                 | McMillan A.S.; Allen P.F.; Bin Ismail I.                                                                                         | 1998 |
| Localized ridge augmentation using a micro titanium mesh: a report on 27 implants followed from 1 to 3 years after functional loading.                            | von Arx T.; Wallkamm B.; Hardt N.                                                                                                | 1998 |
| Soft tissue response to plaque formation at different implant systems. A comparative study in the dog.                                                            | Abrahamsson I.; Berglundh T.; Lindhe J.                                                                                          | 1998 |
| Implant placement and simultaneous peri-implant bone grafting using a micro titanium mesh for graft stabilization.                                                | von Arx T.; Kurt B.                                                                                                              | 1998 |
| Changes in peri-implant tissues subjected to orthodontic forces and ligature breakdown in monkeys.                                                                | Hürzeler M.B.; Quiñones C.R.; Kohal R.J.; Rohde M.; Strub J.R.; Teuscher U.; Caffesse R.G.                                       | 1998 |
| Use of the Endopore dental implant to restore single teeth in the maxilla: protocol and early results.                                                            | Deporter D.A.; Todescan R.; Watson P.A.; Pharoah M.; Levy D.; Nardini K.                                                         | 1998 |
| Overdentures stabilised by two IMZ implants in the lower jaw--a 5-8 year retrospective study.                                                                     | Heydenrijk K.; Batenburg R.H.; Raghoobar G.M.; Meijer H.J.; van Oort R.P.; Stegenga B.                                           | 1998 |
| Osseointegrated implants and orbital defects: U.C.L.A. experience.                                                                                                | Nishimura R.D.; Roumanas E.; Moy P.K.; Sugai T.; Freymiller E.G.                                                                 | 1998 |
| Microbiota associated with experimental peri-implantitis and periodontitis in adult Macaca mulatta monkeys.                                                       | Eke P.I.; Braswell L.D.; Fritz M.E.                                                                                              | 1998 |
| Biological factors contributing to failures of osseointegrated oral implants. (I). Success criteria and epidemiology.                                             | Esposito M.; Hirsch J.M.; Lekholm U.; Thomsen P.                                                                                 | 1998 |
| The key to success: maintaining the long-term health of implants.                                                                                                 | Silverstein L.; Garg A.; Callan D.; Shatz P.                                                                                     | 1998 |
| Histological evaluation of Bio-Oss in a 2-stage sinus floor elevation and implantation procedure. A human case report.                                            | Valentini P.; Abensur D.; Densari D.; Graziani J.N.; Hämmerle C.                                                                 | 1998 |
| Evaluation of bone healing in patients with bone grafts and endosseous implants using single photon emission tomography (SPECT).                                  | Schliephake H.; Berding G.                                                                                                       | 1998 |
| The mandibular staple bone plate: A long-term retrospective evaluation                                                                                            | Meijer H.J.A.; Van Oort R.P.; Raghoobar G.M.; Schoen P.J.                                                                        | 1998 |

|                                                                                                                                                                             |                                                                                                          |      |
|-----------------------------------------------------------------------------------------------------------------------------------------------------------------------------|----------------------------------------------------------------------------------------------------------|------|
| Evaluation of three different dental implants in ligature-induced peri-implantitis in the beagle dog. Part II. Histology and microbiology.                                  | Tillmanns H.W.; Hermann J.S.; Tiffée J.C.; Burgess A.V.; Meffert R.M.                                    | 1998 |
| Endosseous implant management of tumor patients with the bone lock system. A 5-year study                                                                                   | Kovács A.                                                                                                | 1998 |
| Bone regeneration for reintegration in peri-implant destruction.                                                                                                            | Artzi Z.; Tal H.; Chweidan H.                                                                            | 1998 |
| Radiographic assessment of peri-implant vertical bone loss: DICRG interim report no. 9                                                                                      | Manz M.C.; Morris H.F.                                                                                   | 1997 |
| Diagnosis and management of peri-implant disease.                                                                                                                           | Kao R.T.; Curtis D.A.; Murray P.A.                                                                       | 1997 |
| Treatment of retrograde peri-implantitis: clinical report.                                                                                                                  | Bretz W.A.; Matuck A.N.; de Oliveira G.; Moretti A.J.; Bretz W.A.                                        | 1997 |
| Etiology, diagnosis, and treatment considerations in peri-implantitis.                                                                                                      | Mombelli A.                                                                                              | 1997 |
| Prosthodontic and periodontal considerations for implant-supported dental restorations.                                                                                     | Cooper L.; Moriarty J.                                                                                   | 1997 |
| Comparison of periodontal and peri-implant probing by depth-force pattern analysis.                                                                                         | Mombelli A.; Mühle T.; Brägger U.; Lang N.P.; Bürgin W.B.                                                | 1997 |
| Reproducibility of automated periodontal probing around teeth and osseointegrated oral implants.                                                                            | Christensen M.M.; Joss A.; Lang N.P.                                                                     | 1997 |
| Nonsteroidal anti-inflammatory drugs as adjuncts in the management of periodontal diseases and peri-implantitis.                                                            | Salvi G.E.; Williams R.C.; Offenbacher S.                                                                | 1997 |
| Treatment of severe peri-implant bone loss using autogenous bone and a resorbable membrane. Case report and literature review.                                              | von Arx T.; Kurt B.; Hardt N.                                                                            | 1997 |
| Therapy of peri-implant inflammation with the CO2 swift laser system. An in vitro and in vivo study                                                                         | Deppe H.; Horch H.H.; Hiermer T.; Lebelt G.; Milatovic D.; Henke J.; Erhardt W.                          | 1997 |
| Regeneration of peri-implant infrabony defects using PerioGlas: a pilot study in rabbits.                                                                                   | Johnson M.W.; Sullivan S.M.; Rohrer M.; Collier M.                                                       | 1997 |
| Associations between clinical parameters assessed around implants and teeth.                                                                                                | Brägger U.; Bürgin W.B.; Hämmerle C.H.; Lang N.P.                                                        | 1997 |
| Preliminary results of a multicenter study evaluating a chemically enhanced surface for machined commercially pure titanium implants.                                       | Sullivan D.Y.; Sherwood R.L.; Mai T.N.                                                                   | 1997 |
| Association between marginal bone loss around osseointegrated mandibular implants and smoking habits: a 10-year follow-up study.                                            | Lindquist L.W.; Carlsson G.E.; Jemt T.                                                                   | 1997 |
| The combined use of endosteal implants and iliac crest onlay grafts in the severely atrophic mandible: a longitudinal study.                                                | Verhoeven J.W.; Cune M.S.; Terlou M.; Zoon M.A.; de Putter C.                                            | 1997 |
| Effects of guided bone regeneration around commercially pure titanium and hydroxyapatite-coated dental implants. II. Histologic analysis.                                   | Stentz W.C.; Mealey B.L.; Gunsolley J.C.; Waldrop T.C.                                                   | 1997 |
| Controlled local delivery of tetracycline HCl in the treatment of periimplant mucosal hyperplasia and mucositis. A controlled case series.                                  | Schenk G.; Flemmig T.F.; Betz T.; Reuther J.; Klaiber B.                                                 | 1997 |
| Crevicular fluid analysis around two failing dental implants: a clinical report.                                                                                            | Curtis D.A.; Kao R.; Plesh O.; Finzen F.; Franz L.                                                       | 1997 |
| Human neutrophil collagenase MMP-8 in peri-implant sulcus fluid and its inhibition by clodronate.                                                                           | Teronen O.; Kontinen Y.T.; Lindqvist C.; Salo T.; Ingman T.; Lauhio A.; Ding Y.; Santavirta S.; Sorsa T. | 1997 |
| Evaluation of three different dental implants in ligature-induced peri-implantitis in the beagle dog. Part I. Clinical evaluation.                                          | Tillmanns H.W.; Hermann J.S.; Cagna D.R.; Burgess A.V.; Meffert R.M.                                     | 1997 |
| Bone formation and reosseointegration in peri-implantitis defects following surgical implantation of rhBMP-2.                                                               | Hanisch O.; Tatakis D.N.; Boskovic M.M.; Rohrer M.D.; Wikesjö U.M.                                       | 1997 |
| Early detection of threatened implant loss in tumor patients                                                                                                                | Weischer T.; Mohr C.                                                                                     | 1997 |
| Periodontal parameters of osseointegrated dental implants. A 4-year controlled follow-up study.                                                                             | Nishimura K.; Itoh T.; Takaki K.; Hosokawa R.; Naito T.; Yokota M.                                       | 1997 |
| Hard-tissue augmentation for the placement of anterior dental implants.                                                                                                     | Weber H.P.; Fiorellini J.P.; Buser D.A.                                                                  | 1997 |
| The mucosal barrier following abutment dis/reconnection. An experimental study in dogs.                                                                                     | Abrahamsson I.; Berglundh T.; Lindhe J.                                                                  | 1997 |
| Mandibular overdentures anchored to single implants: a five-year prospective study.                                                                                         | Cordioli G.; Majzoub Z.; Castagna S.                                                                     | 1997 |
| Long-term efficacy of hydroxyapatite-coated cylindrical implants.                                                                                                           | Hahn J.; Vassos D.M.                                                                                     | 1997 |
| Long-term evaluation of non-submerged ITI implants. Part 1: 8-year life table analysis of a prospective multi-center study with 2359 implants.                              | Buser D.; Mericske-Stern R.; Bernard J.P.; Behneke A.; Behneke N.; Hirt H.P.; Belser U.C.; Lang N.P.     | 1997 |
| Vertical ridge augmentation using polylactic membranes in conjunction with immediate implants in periodontally compromised extraction sites: an experimental study in dogs. | Schliephake H.; Kracht D.                                                                                | 1997 |
| The Frialit-2 implant system: five-year clinical experience in single-tooth and immediately postextraction applications.                                                    | Gomez-Roman G.; Schulte W.; d'Hoedt B.; Axman-Krcmar D.                                                  | 1997 |
| Implant-supported telescopic restorations in maxillofacial prosthetics.                                                                                                     | Weischer T.; Schettler D.; Mohr C.                                                                       | 1997 |
| Complications and maintenance requirements of implant-supported prostheses provided in a UK dental hospital.                                                                | Allen P.F.; McMillan A.S.; Smith D.G.                                                                    | 1997 |
| A comparative prospective clinical study of two single-tooth implants: a preliminary report of 102 implants.                                                                | Kemppainen P.; Eskola S.; Ylipaavalniemi P.                                                              | 1997 |
| Effects of subgingival chlorhexidine irrigation on peri-implant maintenance.                                                                                                | Felo A.; Shibly O.; Ciano S.G.; Lauciello F.R.; Ho A.                                                    | 1997 |
| Periodontal bacteria colonizing oral mucous membranes in edentulous patients wearing dental implants.                                                                       | Danser M.M.; van Winkelhoff A.J.; van der Velden U.                                                      | 1997 |
| A controlled clinical trial of implant-retained mandibular overdentures: clinical aspects.                                                                                  | Boerrigter E.M.; van Oort R.P.; Raghoobar G.M.; Stegenga B.; Schoen P.J.; Boering G.                     | 1997 |

|                                                                                                                                                                                                      |                                                                                                                                                      |      |
|------------------------------------------------------------------------------------------------------------------------------------------------------------------------------------------------------|------------------------------------------------------------------------------------------------------------------------------------------------------|------|
| Effects of guided bone regeneration around commercially pure titanium and hydroxyapatite-coated dental implants. I. Radiographic analysis.                                                           | Stentz W.C.; Mealey B.L.; Nummikoski P.V.; Gunsolley J.C.; Waldrop T.C.                                                                              | 1997 |
| Long-term evaluation of single crystal sapphire implants as abutments in fixed prosthodontics.                                                                                                       | Fartash B.; Arvidson K.                                                                                                                              | 1997 |
| Responses of peri-implant tissues to undisturbed plaque formation in dogs: clinical, radiographic, and microbiological findings.                                                                     | Saito A.; Hosaka Y.; Sekiguchi K.; Kigure T.; Isobe S.; Shibukawa Y.; Sumii H.; Ito T.; Nakagawa T.; Yamada S.                                       | 1997 |
| Composition of plaque-associated lesions in the gingiva and the peri-implant mucosa in partially edentulous subjects.                                                                                | Liljenberg B.; Gualini F.; Berglundh T.; Tonetti M.; Lindhe J.                                                                                       | 1997 |
| Healing at implants with and without primary bone contact. An experimental study in dogs.                                                                                                            | Scipioni A.; Bruschi G.B.; Giargia M.; Berglundh T.; Lindhe J.                                                                                       | 1997 |
| Experimental peri-implant tissue breakdown around hydroxyapatite-coated implants.                                                                                                                    | Hanisch O.; Cortella C.A.; Boskovic M.M.; James R.A.; Slots J.; Wikesjö U.M.                                                                         | 1997 |
| Three-year evaluation of Brånemark implants connected to angulated abutments.                                                                                                                        | Balshi T.J.; Ekfeldt A.; Stenberg T.; Vrielinck L.                                                                                                   | 1997 |
| Osseointegration of rough acid-etched implants: one-year follow-up of placement of 100 minimatic implants.                                                                                           | De Leonardis D.; Garg A.K.; Pecora G.E.; Andreana S.                                                                                                 | 1997 |
| A nationwide evaluative study on implant-retained overdentures.                                                                                                                                      | Cune M.S.; de Putter C.; Hoogstraten J.                                                                                                              | 1997 |
| Implant-supported single-tooth replacements: risk of implant and prosthesis failure.                                                                                                                 | Walther W.; Klemke J.; Wörle M.; Heners M.                                                                                                           | 1996 |
| Advanced imaging methods                                                                                                                                                                             | Matteson S.R.; Deahl S.T.; Alder M.E.; Nummikoski P.V.                                                                                               | 1996 |
| Recession of the soft tissue margin at oral implants. A 2-year longitudinal prospective study.                                                                                                       | Bengazi F.; Wennström J.L.; Lekholm U.                                                                                                               | 1996 |
| Guided bone regeneration in the treatment of periimplantitis.                                                                                                                                        | Persson L.G.; Ericsson I.; Berglundh T.; Lindhe J.                                                                                                   | 1996 |
| Nasal defects and osseointegrated implants: UCLA experience.                                                                                                                                         | Nishimura R.D.; Roumanas E.; Moy P.K.; Sugai T.                                                                                                      | 1996 |
| The effect of antimicrobial therapy on periimplantitis lesions. An experimental study in the dog.                                                                                                    | Ericsson I.; Persson L.G.; Berglundh T.; Edlund T.; Lindhe J.                                                                                        | 1996 |
| Horseshoe Le Fort I osteotomy in combination with endosteal implants--a median-term follow-up study.                                                                                                 | Watzinger F.; Ewers R.; Millesi W.; Kirsch A.; Glaser C.; Ackermann K.L.                                                                             | 1996 |
| Peri-arteritis causing ureteric obstruction                                                                                                                                                          | Sharma S.D.; Burgess N.A.; Doble A.; Doyle P.T.                                                                                                      | 1996 |
| Periodontitis vs. peri-implantitis: The same disease? The same treatment?                                                                                                                            | Meffert R.M.                                                                                                                                         | 1996 |
| Rehabilitation of mandibular edentulism by single crystal sapphire implants and overdentures: 3-12 year results in 86 patients. A dual center international study.                                   | Fartash B.; Tangerud T.; Silness J.; Arvidson K.                                                                                                     | 1996 |
| Immediate transmucosal implants using the principle of guided tissue regeneration (II). A cross-sectional study comparing the clinical outcome 1 year after immediate to standard implant placement. | Brägger U.; Hämmerle C.H.; Lang N.P.                                                                                                                 | 1996 |
| Correlations between radiographic, clinical and mobility parameters after loading of oral implants with fixed partial dentures. A 2-year longitudinal study.                                         | Brägger U.; Hugel-Pisoni C.; Bürgin W.; Buser D.; Lang N.P.                                                                                          | 1996 |
| The influence of abutment surface roughness on plaque accumulation and peri-implant mucositis.                                                                                                       | Bollen C.M.; Papaioanno W.; Van Eldere J.; Schepers E.; Quirynen M.; van Steenberghe D.                                                              | 1996 |
| Efficacy of threaded hydroxyapatite-coated implants in the anterior mandible supporting overdentures.                                                                                                | Buchs A.U.; Hahn J.; Vassos D.M.                                                                                                                     | 1996 |
| Osseointegrated implants in patients treated for generalized severe adult periodontitis. An interim report.                                                                                          | Mengel R.; Stelzel M.; Hasse C.; Flores-de-Jacoby L.                                                                                                 | 1996 |
| Reconstruction of the severely resorbed maxilla with dental implants in the augmented maxillary sinus: a 5-year clinical investigation.                                                              | Hürzeler M.B.; Kirsch A.; Ackermann K.L.; Quiñones C.R.                                                                                              | 1996 |
| Periodontal tissue engineering by growth factors                                                                                                                                                     | Giannobile W.V.                                                                                                                                      | 1996 |
| Progressive peri-implantitis. Incidence and prediction of peri-implant attachment loss.                                                                                                              | Jepsen S.; Rühling A.; Jepsen K.; Ohlenbusch B.; Albers H.K.                                                                                         | 1996 |
| Efficacy of threaded hydroxyapatite-coated implants placed in the posterior mandible in support of fixed prostheses.                                                                                 | Buchs A.U.; Hahn J.; Vassos D.M.                                                                                                                     | 1996 |
| Loss of osseointegration caused by occlusal load of oral implants. A clinical and radiographic study in monkeys.                                                                                     | Isidor F.                                                                                                                                            | 1996 |
| The Orthosystem--a new implant system for orthodontic anchorage in the palate.                                                                                                                       | Wehrbein H.; Glatzmaier J.; Mundwiller U.; Diedrich P.                                                                                               | 1996 |
| Crevicular fluid enzymes from endosseous dental implants and natural teeth.                                                                                                                          | Boutros S.M.; Michalowicz B.S.; Smith Q.T.; Aepli D.M.                                                                                               | 1996 |
| A 5-year prospective multicenter follow-up report on overdentures supported by osseointegrated implants.                                                                                             | Jemt T.; Chai J.; Harnett J.; Heath M.R.; Hutton J.E.; Johns R.B.; McKenna S.; McNamara D.C.; van Steenberghe D.; Taylor R.; Watson R.M.; Hermann I. | 1996 |
| An analysis of the diagnostic criteria in assessing peri-implant tissues. A critical analysis of the literature                                                                                      | Weinstein R.L.; Francetti L.; Sironi R.                                                                                                              | 1996 |
| Peri-implantitis.                                                                                                                                                                                    | Bower R.C.                                                                                                                                           | 1996 |
| Similarities between the development and treatment of plaque-induced peri-implantitis and periodontitis.                                                                                             | Soehren S.E.                                                                                                                                         | 1996 |
| Comparison of healed tissues adjacent to submerged and non-submerged unloaded titanium dental implants. A histometric study in beagle dogs.                                                          | Weber H.P.; Buser D.; Donath K.; Fiorellini J.P.; Doppalapudi V.; Paquette D.W.; Williams R.C.                                                       | 1996 |
| Immediate placement of implants into extraction sockets: implant survival.                                                                                                                           | Rosenquist B.; Grenthe B.                                                                                                                            | 1996 |

|                                                                                                                                          |                                                                                     |      |
|------------------------------------------------------------------------------------------------------------------------------------------|-------------------------------------------------------------------------------------|------|
| The effect of an antiseptic mouthrinse on implant maintenance: Plaque and peri-implant gingival tissues                                  | Ciancio S.G.; Lauciello F.; Shibly O.; Vitello M.; Mather M.                        | 1995 |
| Efficacy of threaded hydroxyapatite-coated implants placed in the anterior mandible.                                                     | Buchs A.U.; Hahn J.; Vassos D.M.                                                    | 1995 |
| Nifedipine-induced gingival enlargement around dental implants: a clinical report.                                                       | Silverstein L.H.; Koch J.P.; Lefkove M.D.; Garnick J.J.; Singh B.; Steflik D.E.     | 1995 |
| Plaque-induced peri-implantitis in the presence or absence of keratinized mucosa. An experimental study in monkeys.                      | Warrer K.; Buser D.; Lang N.P.; Karring T.                                          | 1995 |
| Influence of the suprastructure on the peri-implant tissues in beagle dogs.                                                              | Hürzeler M.B.; Quiñones C.R.; Schüpbach P.; Vlassis J.M.; Strub J.R.; Caffesse R.G. | 1995 |
| Auricular prostheses and osseointegrated implants: UCLA experience.                                                                      | Nishimura R.D.; Roumanas E.; Sugai T.; Moy P.K.                                     | 1995 |
| Successful bone fill in late peri-implant defects using guided tissue regeneration. A short communication.                               | Hämmerle C.H.; Fourmoussis I.; Winkler J.R.; Weigel C.; Brägger U.; Lang N.P.       | 1995 |
| Implant-retained overdentures. Part 1. Clinical findings from an evaluation study                                                        | Cune M.S.; de Putter C.; Hoogstraten J.                                             | 1995 |
| Periimplant tissue considerations for optimal implant results.                                                                           | Saadoun A.P.                                                                        | 1995 |
| Evidence-based periodontal treatment. II. Predictable regeneration treatment.                                                            | Newman M.G.; McGuire M.K.                                                           | 1995 |
| Brånemark single tooth implants: a preliminary report of 76 implants.                                                                    | Haas R.; Mensdorff-Pouilly N.; Mailath G.; Watzek G.                                | 1995 |
| Antimicrobial susceptibility of periodontopathic bacteria associated with failing implants                                               | Sbordone L.; Barone A.; Ramaglia L.; Ciaglia R.N.; Iacono V.J.                      | 1995 |
| Histologic probe penetration in healthy and inflamed peri-implant tissues.                                                               | Lang N.P.; Wetzel A.C.; Stich H.; Caffesse R.G.                                     | 1994 |
| Experimentally induced peri-implant mucositis. A clinical study in humans.                                                               | Pontoriero R.; Tonelli M.P.; Carnevale G.; Mombelli A.; Nyman S.R.; Lang N.P.       | 1994 |
| The rationale for soft-tissue grafting and vestibuloplasty in association with endosseous implants: a literature review.                 | Hoelscher D.C.; Simons A.M.                                                         | 1994 |
| Contaminated implant surfaces: An in vitro comparison of implant surface coating and treatment modalities for decontamination            | Dennison D.K.; Huerzeler M.B.; Quinones C.; Caffese R.G.                            | 1994 |
| Inhibition of peri-implant bone loss with the nonsteroidal anti-inflammatory drug flurbiprofen in beagle dogs. A preliminary study.      | Weber H.P.; Fiorellini J.P.; Paquette D.W.; Howell T.H.; Williams R.C.              | 1994 |
| Evaluation of the effects of diagnostic radiation on titanium dental implant osseointegration in the micropig.                           | Basquill P.J.; Steflik D.E.; Brennan W.A.; Horner J.; Van Dyke T.E.                 | 1994 |
| A progressive treatment protocol for maintaining tissue associated with implants.                                                        | Love W.B.; Backman G.W.                                                             | 1994 |
| Diagnosis and treatment of peri-implant disease.                                                                                         | Jovanovic S.A.                                                                      | 1994 |
| Assessing bacterial risk factors for periodontitis and peri-implantitis: using evidence to enhance outcomes.                             | Newman M.G.; Marinho V.C.                                                           | 1994 |
| Treatment outcome with implant-retained overdentures: Part I--Clinical findings and predictability of clinical treatment outcome.        | Cune M.S.; de Putter C.; Hoogstraten J.                                             | 1994 |
| Technetium 99m-MDP scintigraphy of patients undergoing implant prosthetic procedures: a follow-up study.                                 | Meidan Z.; Weisman S.; Baron J.; Binderman I.                                       | 1994 |
| The influence of the masticatory mucosa on the peri-implant soft tissue condition.                                                       | Wennström J.L.; Bengazi F.; Lekholm U.                                              | 1994 |
| Peri-implant mucosal aspects of ITI implants supporting overdentures. A five-year longitudinal study.                                    | Mericske-Stern R.; Steinlin Schaffner T.; Marti P.; Geering A.H.                    | 1994 |
| Complications and maintenance requirements for fixed prostheses and overdentures in the edentulous mandible: a 5-year report.            | Hemmings K.W.; Schmitt A.; Zarb G.A.                                                | 1994 |
| Characteristics associated with the loss and peri-implant tissue health of endosseous dental implants.                                   | Weyant R.J.                                                                         | 1994 |
| Forces on implants supporting overdentures: a preliminary study of morphologic and cephalometric considerations.                         | Mericske-Stern R.                                                                   | 1993 |
| A proposed radiographic index for assessment of the current status of osseointegration.                                                  | Nasr H.F.; Meffert R.M.                                                             | 1993 |
| The management of peri-implant breakdown around functioning osseointegrated dental implants.                                             | Jovanovic S.A.                                                                      | 1993 |
| Glycosaminoglycans in peri-implant sulcus fluid from implants supporting fixed or removable prostheses.                                  | Smedberg J.I.; Beck C.B.; Embury G.                                                 | 1993 |
| Clinical applications compared in implantology                                                                                           | Ito A.; D'Amato S.                                                                  | 1993 |
| Reproducibility and detection threshold of peri-implant diagnostics.                                                                     | van Steenberghe D.; Quirynen M.                                                     | 1993 |
| Application of digital radiography to implantology.                                                                                      | Jeffcoat M.K.                                                                       | 1993 |
| Oral and dental infections with anaerobic bacteria: Clinical features, predominant pathogens, and treatment                              | Tanner A.; Stillman N.                                                              | 1993 |
| The regenerative potential of plaque-induced peri-implant bone defects treated by a submerged membrane technique: an experimental study. | Jovanovic S.A.; Kenney E.B.; Carranza Jr. F.A.; Donath K.                           | 1993 |
| Effects of drill cooling and bone structure on IMZ implant fixation.                                                                     | Haider R.; Watzek G.; Plenk H.                                                      | 1993 |
| The use of free gingival grafts in the treatment of peri-implant soft tissue complications: clinical report.                             | Simons A.M.; Darany D.G.; Giordano J.R.                                             | 1993 |
| Antimicrobial treatment of peri-implant infections.                                                                                      | Mombelli A.; Lang N.P.                                                              | 1992 |

|                                                                                                                                                                           |                                                                                                                                                                                                                                                                                     |      |
|---------------------------------------------------------------------------------------------------------------------------------------------------------------------------|-------------------------------------------------------------------------------------------------------------------------------------------------------------------------------------------------------------------------------------------------------------------------------------|------|
| Plaque-induced marginal tissue reactions of osseointegrated oral implants: a review of the literature.                                                                    | Schou S.; Holmstrup P.; Hjørtting-Hansen E.; Lang N.P.                                                                                                                                                                                                                              | 1992 |
| Biological requirements for material integration.                                                                                                                         | O'Neal R.B.; Sauk J.J.; Somerman M.J.                                                                                                                                                                                                                                               | 1992 |
| The biology and morphology of the implant-tissue interface.                                                                                                               | Weber H.P.; Fiorellini J.P.                                                                                                                                                                                                                                                         | 1992 |
| Soft tissue management during implant maintenance.                                                                                                                        | Rapley J.W.; Mills M.P.; Wylam J.                                                                                                                                                                                                                                                   | 1992 |
| Use of an antibiotic-bonded graft for in situ reconstruction after prosthetic graft infections                                                                            | Colburn M.D.; Moore W.S.; Chvapil M.; Gelabert H.A.; Quinones-Baldrich W.J.; McIntyre Jr. K.E.; Reilly L.M.                                                                                                                                                                         | 1992 |
| Soft tissue reactions to non-submerged unloaded titanium implants in beagle dogs.                                                                                         | Buser D.; Weber H.P.; Donath K.; Fiorellini J.P.; Paquette D.W.; Williams R.C.                                                                                                                                                                                                      | 1992 |
| The occurrence of periodontitis-related microorganisms in relation to titanium implants.                                                                                  | Ong E.S.; Newman H.N.; Wilson M.; Bulman J.S.                                                                                                                                                                                                                                       | 1992 |
| Microbial etiology of periodontal diseases. Where are we? Where are we going?                                                                                             | Tanner A.                                                                                                                                                                                                                                                                           | 1992 |
| A comparative study of the clinical efficacy of Screw Vent implants versus Brånemark fixtures, installed in a periodontal clinic.                                         | De Bruyn H.; Collaert B.; Lindén U.; Flygare L.                                                                                                                                                                                                                                     | 1992 |
| Prospective review of integral implants.                                                                                                                                  | Block M.S.; Kent J.N.                                                                                                                                                                                                                                                               | 1992 |
| Control of peri-implant inflammation.                                                                                                                                     | Hillenburg K.L.; Kosinski T.F.; Mentag P.J.                                                                                                                                                                                                                                         | 1991 |
| Levels of glycosaminoglycans in peri-implant sulcus fluid as a means of monitoring bone response to endosseous dental implants.                                           | Beck C.B.; Embery G.; Langley M.S.; Waddington R.J.                                                                                                                                                                                                                                 | 1991 |
| Microbiologic characterization of ligature-induced peri-implantitis in the microswine model.                                                                              | Hickey J.S.; O'Neal R.B.; Scheidt M.J.; Strong S.L.; Turgeon D.; Van Dyke T.E.                                                                                                                                                                                                      | 1991 |
| Implant maintenance: debridement and peri-implant home care.                                                                                                              | Bauman G.R.; Mills M.; Rapley J.W.; Hallmon W.W.                                                                                                                                                                                                                                    | 1991 |
| Clinical and microbiological findings on newly inserted hydroxyapatite-coated and pure titanium human dental implants.                                                    | Rams T.E.; Roberts T.W.; Feik D.; Molzan A.K.; Slots J.                                                                                                                                                                                                                             | 1991 |
| Periimplant alterations under cyclosporin A drug treatment                                                                                                                | Günay H.; Evers B.                                                                                                                                                                                                                                                                  | 1991 |
| Maintenance and osseointegrated implants                                                                                                                                  | Detienville R.; Besnainou B.; Mirot F.                                                                                                                                                                                                                                              | 1991 |
| Protease activities in peri-implant sulcus fluid from patients with permucosal osseointegrated dental implants. Correlation with clinical parameters.                     | Eley B.M.; Cox S.W.; Watson R.M.                                                                                                                                                                                                                                                    | 1991 |
| What causes peri-implantitis?                                                                                                                                             | Meffert R.M.                                                                                                                                                                                                                                                                        | 1991 |
| Peri-implant osseous regeneration                                                                                                                                         | Celletti R.; Davarpanah M.; Pecora G.                                                                                                                                                                                                                                               | 1991 |
| Tissue integration of non-submerged implants. 1-year results of a prospective study with 100 ITI hollow-cylinder and hollow-screw implants.                               | Buser D.; Weber H.P.; Lang N.P.                                                                                                                                                                                                                                                     | 1990 |
| Maintaining periodontal treatment.                                                                                                                                        | Wilson Jr. T.G.                                                                                                                                                                                                                                                                     | 1990 |
| Periodontal requirements in osseointegrated and biointegrated implantology                                                                                                | Saadoun A.P.                                                                                                                                                                                                                                                                        | 1990 |
| Dental professional's role in monitoring and maintenance of tissue-integrated prostheses.                                                                                 | Orton G.S.; Steele D.L.; Wolinsky L.E.                                                                                                                                                                                                                                              | 1989 |
| Soft-tissue modifications of surgical techniques for placement and uncovering of osseointegrated implants.                                                                | Moy P.K.; Weinlaender M.; Kenney E.B.                                                                                                                                                                                                                                               | 1989 |
| Conditions of the gingiva around endosteal implants with attached and unattached mucosa                                                                                   | Lill W.; Forster H.; Eckhardt C.; Matejka M.; Watzek G.                                                                                                                                                                                                                             | 1989 |
| Microbiota and crevicular fluid collagenase activity in the osseointegrated dental implant sulcus: a comparison of sites in edentulous and partially edentulous patients. | Apse P.; Ellen R.P.; Overall C.M.; Zarb G.A.                                                                                                                                                                                                                                        | 1989 |
| Periodontal considerations of implants and implant associated microbiota.                                                                                                 | Newman M.G.; Flemmig T.F.                                                                                                                                                                                                                                                           | 1988 |
| The ceramic coated cementless total hip arthroplasty: Basic concepts and surgical technique                                                                               | Bousquet G.; Gazielly D.F.; Debieffe J.L.                                                                                                                                                                                                                                           | 1985 |
| Total prosthetic replacement of aortic valve in calves                                                                                                                    | Larson R.E.; McGoon D.C.                                                                                                                                                                                                                                                            | 1964 |
| Analysis of the association of IL1B (C+3954T) and IL1RN (intron 2) polymorphisms with dental implant loss in a Brazilian population                                       | Montes, Claudia Cristina; Alvim-Pereira, Fabiano; de Castilhos, Bruno Borges; Lopes Sakurai, Marcos Luciano; Olandoski, Marcia; Trevilatto, Paula Cristina                                                                                                                          | 2009 |
| Biomarkers Associated With Periimplant Diseases                                                                                                                           | Li, Jeff Yuanjun; Wang, Hom-Lay                                                                                                                                                                                                                                                     | 2014 |
| Fluid Exudates From Inflamed Bone-Anchored Hearing Aids Demonstrate Elevated Levels of Cytokines and Biomarkers of Tissue and Bone Metabolism                             | Grant, Melissa M.; Monksfield, Peter; Proops, David; Brine, Maxine; Addison, Owen; Sammons, Rachel L.; Matthews, John B.; Reid, Andrew; Chapple, Iain L. C.                                                                                                                         | 2010 |
| Metal Nanoparticles Released from Dental Implant Surfaces: Potential Contribution to Chronic Inflammation and Peri-Implant Bone Loss                                      | Bressan, Eriberto; Ferroni, Letizia; Gardin, Chiara; Bellin, Gloria; Sbricoli, Luca; Sivoletta, Stefano; Brunello, Giulia; Schwartz-Arad, Devorah; Mijiritsky, Eitan; Penarrocha, Miguel; Penarrocha, David; Taccioli, Cristian; Tatullo, Marco; Piattelli, Adriano; Zavan, Barbara | 2019 |
| The effect of orally administered probiotic Lactobacillus reuteri-containing tablets in peri-implant mucositis: a double-blind randomized controlled trial.               | Flichy-Fernandez, A. J.; Ata-Ali, J.; Alegre-Domingo, T.; Candel-Martí, E.; Ata-Ali, F.; Palacio, J. R.; Penarrocha-Diago, M.                                                                                                                                                       | 2015 |
| The pathology of bone tissue during peri-implantitis.                                                                                                                     | Schminke, B.; Vom Orde, F.; Gruber, R.; Schliephake, H.; Burgers, R.; Miosge, N.                                                                                                                                                                                                    | 2015 |

|                                                                                                                                                                                              |                                                                                                                                                                                                                                                |      |
|----------------------------------------------------------------------------------------------------------------------------------------------------------------------------------------------|------------------------------------------------------------------------------------------------------------------------------------------------------------------------------------------------------------------------------------------------|------|
| Diagnosing peri-implant disease using the tongue as a 24/7 detector.                                                                                                                         | Ritzer, J.; Luhmann, T.; Rode, C.; Pein-Hackelbusch, M.; Immohr, I.; Schedler, U.; Thiele, T.; Stubinger, S.; Rechenberg, B. V.; Waser-Althaus, J.; Schlottig, F.; Merli, M.; Dawe, H.; Karpisek, M.; Wyrwa, R.; Schnabelrauch, M.; Meinel, L. | 2017 |
| Calprotectin and cross-linked N-telopeptides of type I collagen levels in crevicular fluid from implant sites with peri-implant diseases: a pilot study.                                     | Sakamoto, Eijiro; Kido, Rie; Tomotake, Yoritoki; Naitou, Yoshihito; Ishida, Yuichi; Kido, Jun-Ichi                                                                                                                                             | 2018 |
| Genetic involvement in dental implant failure: Association with polymorphisms of genes modulating inflammatory responses and bone metabolism.                                                | Chen, Xun; Zhao, Yu                                                                                                                                                                                                                            | 2019 |
| In vivo osteoprotegerin gene therapy preventing bone loss induced by periodontitis.                                                                                                          | Tang, H.; Mattheos, N.; Yao, Y.; Jia, Y.; Ma, L.; Gong, P.                                                                                                                                                                                     | 2015 |
| Relationship between interleukin-1 genotype and peri-implantitis: a literature review.                                                                                                       | Andreiotelli, Marina; Koutayas, Spiridon-Oumvertos; Madianos, Phoebus N.; Strub, Jorg-Rudolf                                                                                                                                                   | 2008 |
| Biological factors involved in implant-anchored orthodontics and in prosthetic-implant therapy: a literature review.                                                                         | Antoszevska, Joanna; Raftowicz-Wojcik, Katarzyna; Kawala, Beata; Matthews-Brzozowska, Teresa                                                                                                                                                   | 2010 |
| Collagenase-2 (MMP-8) as a point-of-care biomarker in periodontitis and cardiovascular diseases. Therapeutic response to non-antimicrobial properties of tetracyclines.                      | Sorsa, Timo; Tervahartiala, Taina; Leppilahti, Jussi; Hernandez, Marcela; Gamonal, Jorge; Tuomainen, Anita M.; Lauhio, Anneli; Pussinen, Pirkko J.; Mantyla, Paivi                                                                             | 2011 |
| Detection and measurement of inflammatory cytokines in implant crevicular fluid: a pilot study.                                                                                              | Panagakos, F. S.; Aboyoussef, H.; Dondero, R.; Jandinski, J. J.                                                                                                                                                                                | 1996 |
| A critical assessment of interleukin-1 (IL-1) genotyping when used in a genetic susceptibility test for severe chronic periodontitis.                                                        | Greenstein, Gary; Hart, Thomas C.                                                                                                                                                                                                              | 2002 |
| Analysis of aspartate aminotransferase and alkaline phosphatase in crevicular fluid from implants with and without peri-implantitis.                                                         | Paknejad, Mojgan; Emtiaz, Shahram; Khoobyari, Mohammad Mohsen; Gharb, Mehrnoush Teimouri; Yazdi, Mojtaba Tabatabaei                                                                                                                            | 2006 |
| Role of fibroblast populations in peri-implantitis.                                                                                                                                          | Bordin, Sandra; Flemmig, Thomas F.; Verardi, Simone                                                                                                                                                                                            | 2009 |
| Human neutrophil collagenase MMP-8 in peri-implant sulcus fluid and its inhibition by clodronate.                                                                                            | Teronen, O.; Kontinen, Y. T.; Lindqvist, C.; Salo, T.; Ingman, T.; Lauhio, A.; Ding, Y.; Santavirta, S.; Sorsa, T.                                                                                                                             | 1997 |
| Detection of Prostaglandin E 2 and Matrix Metalloproteinases in Implant Crevicular Fluid.                                                                                                    | Aboyoussef, Hoda; Carter, Cristina; Jandinski, John J.; Panagakos, Fotinos S.                                                                                                                                                                  | 1998 |
| Inhibition of the degradation of connective tissue matrix protein components in mammals                                                                                                      | Teronen, Olli Pekka; Sorsa, Timo Arto; Salo, Tuula Anneli                                                                                                                                                                                      | 1997 |
| Patients with peri-implantitis, unlike those with a healthy peri-implant microenvironment, display antibodies to more than one heat shock protein (HSP 27, HSP 65 and HSP 90) linear epitope | Masulli, L.; Pompa, G.; Fabrizi, M.; Quaranta, A.; Voza, I.; Piccoli, L.; Antonelli, A.; Marzocchella, L.; Di Carlo, S.; Perrotti, V.                                                                                                          | 2011 |
| Human $\beta$ -defensin-1 and -2 and matrix metalloproteinase-25 and -26 expression in chronic and aggressive periodontitis and in peri-implantitis                                          | Kuula, Heidi; Salo, Tuula; Pirilä, Emma; Hagström, Jaana; Luomanen, Marita; Gutierrez-Fernandez, Ana; Romanos, Georgios E.; Sorsa, Timo                                                                                                        | 2008 |
| Are peri-implantitis lesions different from periodontitis lesions?                                                                                                                           | Berglundh, Tord; Zitzmann, Nicola U.; Donati, Mauro                                                                                                                                                                                            | 2011 |
| Tissue inhibitor of metalloproteinases-1, matrix metalloproteinases-1 and -8, and collagenase activity levels in peri-implant crevicular fluid after implantation                            | Nomura, Takashi; Ishii, Ayato; Shimizu, Hiroshi; Taguchi, Naoyuki; Yoshie, Hiromasa; Kusakari, Haruka; Hara, Kohji                                                                                                                             | 2000 |
| Regulation of osteoclast activity in peri-implant tissues                                                                                                                                    | Haynes, D. R.; Crotti, T. N.; Zreiqat, H.                                                                                                                                                                                                      | 2004 |
| Scientific basis of a matrix metalloproteinase-8 specific chair-side test for monitoring periodontal and peri-implant health and disease                                                     | Sorsa, Timo; Mäntylä, Päivi; Rönkä, Hanne; Kallio, Pekka; KALLIS, GÜN-BRITT; Lundqvist, Christina; Kinane, Denis F.; Salo, Tuula; Golub, Lorne M.; Teronen, Olli                                                                               | 1999 |
| Peri-implant diseases: diagnosis and risk indicators                                                                                                                                         | Heitz-Mayfield, Lisa JA                                                                                                                                                                                                                        | 2008 |
| Matrix metalloproteinases (MMPs) in oral diseases                                                                                                                                            | Sorsa, Timo; Tjäderhane, Leo; Salo, Tuula                                                                                                                                                                                                      | 2004 |
| Clinical, microbiological, and immunological aspects of healthy versus peri-implantitis tissue in full arch reconstruction patients: a prospective cross-sectional study                     | Ata-Ali, Javier; Flichy-Fernández, Antonio Juan; Alegre-Domingo, Teresa; Ata-Ali, Fadi; Palacio, Jose; Peñarrocha-Diago, Miguel                                                                                                                | 2015 |
| Collagenases in different categories of peri-implant vertical bone loss                                                                                                                      | Ma, Jian; Kitt, Uula; Teronen, Olli; Sorsa, Timo; Husa, Ville; Laine, Pekka; Rönkä, Hanne; Salo, Tuula; Lindqvist, Christian; Kontinen, Yrjö T.                                                                                                | 2000 |
| Characterization of the antioxidant profile of human saliva in peri-implant health and disease                                                                                               | Liskmann, Stanislav; Vihalemm, Tiit; Salum, Olev; Zilmer, Kersti; Fischer, Krista; Zilmer, Mihkel                                                                                                                                              | 2007 |
| Saliva as a diagnostic tool for periodontal disease: current state and future directions                                                                                                     | Giannobile, William V.; Beikler, Thomas; Kinney, Janet S.; Ramseier, Christoph A.; Morelli, Thiago; Wong, David T.                                                                                                                             | 2009 |
| Matrix metalloproteinase-8 is the major potential collagenase in active peri-implantitis                                                                                                     | Arakawa, Hikaru; Uehara, Junji; Hara, Emilio Satoshi; Sonoyama, Wataru; Kimura, Aya; Kanyama, Manabu; Matsuka, Yoshizo; Kuboki, Takuo                                                                                                          | 2012 |
| Oral fluid-based biomarkers of alveolar bone loss in periodontitis                                                                                                                           | Kinney, Janet S.; Ramseier, Christoph A.; Giannobile, William V.                                                                                                                                                                               | 2007 |
| Gingival crevicular fluid collagenase-2 (MMP-8) test stick for chair-side monitoring of periodontitis                                                                                        | Mäntylä, Päivi; Stenman, Mathias; Kinane, Denis F.; Tikanoja, Sari; Luoto, Hanne; Salo, Tuula; Sorsa, Timo                                                                                                                                     | 2003 |
| Inflammation and bone loss in periodontal disease                                                                                                                                            | Cochran, David L.                                                                                                                                                                                                                              | 2008 |
| Expression of matrix metalloproteinases and tissue inhibitors of metalloproteinases in the mouse uterus during the peri-implantation period                                                  | Das, Sanjoy K.; Yano, Shojiro; Wang, Jue; Edwards, Dylan R.; Nagase, Hideaki; Dey, Sudhansu K.                                                                                                                                                 | 1997 |
| C-telopeptide pyridinoline cross-links: Sensitive indicators of periodontal tissue destruction                                                                                               | Giannobile, William V.                                                                                                                                                                                                                         | 1999 |



|                                                                                                                                                                                                  |                                                                                                                                                                                                                                                                       |      |
|--------------------------------------------------------------------------------------------------------------------------------------------------------------------------------------------------|-----------------------------------------------------------------------------------------------------------------------------------------------------------------------------------------------------------------------------------------------------------------------|------|
| Matrix metalloproteinases: contribution to pathogenesis, diagnosis and treatment of periodontal inflammation                                                                                     | Sorsa, Timo; Tjäderhane, Leo; Kontinen, Yrjö T.; Lauhio, Anneli; Salo, Tuula; Lee, Hsi-Ming; Golub, Lorne M.; Brown, David L.; Mäntylä, Päivi                                                                                                                         | 2006 |
| Cytokine and matrix metalloproteinase expression in fibroblasts from peri-implantitis lesions in response to viable <i>P. oryphromonas gingivalis</i>                                            | Irshad, M.; Scheres, N.; Anssari Moin, D.; Crielard, W.; Loos, B. G.; Wismeijer, D.; Laine, M. L.                                                                                                                                                                     | 2013 |
| Progressive peri-implantitis. Incidence and prediction of peri-implant attachment loss.                                                                                                          | Jepsen, Søren; Rühling, A.; Jepsen, K.; Ohlenbusch, B.; Albers, H.-K.                                                                                                                                                                                                 | 1996 |
| Endocrinology and paracrinology: Roles of growth factors during peri-implantation development                                                                                                    | Harvey, M. B.; Leco, K. J.; Arcellana-Panlilio, M. Y.; Zhang, X.; Edwards, D. R.; Schultz, G. A.                                                                                                                                                                      | 1995 |
| Clinical trials of a matrix metalloproteinase inhibitor in human periodontal disease                                                                                                             | Ashley, Robert A.; Team, SDD Clinical Research                                                                                                                                                                                                                        | 1999 |
| Characteristics of collagenase-2 from gingival crevicular fluid and peri-implant sulcular fluid in periodontitis and peri-implantitis patients: pilot study                                      | Xu, Ling; Yu, Zhao; Lee, Hsi-Ming; Wolff, Mark S.; Golub, Lorne M.; Sorsa, Timo; Kuula, Heidi                                                                                                                                                                         | 2008 |
| Effects of Tetracyclines on Neutrophil, Gingival, and Salivary Collagenases: A Functional and Western-Blot Assessment with Special Reference to Their Cellular Sources in Periodontal Diseases a | Sorsa, Timo; Ding, Yanli; Salo, Tuula; Lauhio, Anneli; Teronen, Olli; Ingman, Tuula; Ohtani, Haruo; Andoh, Noriaki; Takeha, Satoshi; Kontinen, Yrjö T.                                                                                                                | 1994 |
| Structure and function of the tooth–epithelial interface in health and disease                                                                                                                   | Pöllänen, Marja T.; Salonen, Jukka I.; Uitto, Veli-Jukka                                                                                                                                                                                                              | 2003 |
| Consensus report: chronic periodontitis                                                                                                                                                          | Lindhe, Jan; Ranney, Richard; Lamster, Ira; Charles, Allan; Chung, Chong-Pyoung; Flemmig, Thomas; Kinane, Denis; Listgarten, Max; Löe, Harald; Schoor, Robert                                                                                                         | 1999 |
| Pathogenesis of implant failures                                                                                                                                                                 | Tonetti, Maurizio S.; Schmid, Jürg                                                                                                                                                                                                                                    | 1994 |
| MMP13, TIMP2 and TGFB3 gene polymorphisms in brazilian chronic periodontitis and periimplantitis subjects                                                                                        | Gonçalves Junior, Roberto; Pinheiro, Aristides da Rosa; Schoichet, José Jorge; Nunes, Carlos Henrique Ramirez; Gonçalves, Rackel; Bonato, Leticia Ladeira; Quinelato, Valquiria; Antunes, Leonardo Santos; Küchler, Erika Calvano; Lobo, Julie Giannobile, William V. | 2016 |
| Host-response therapeutics for periodontal diseases                                                                                                                                              | Giannobile, William V.                                                                                                                                                                                                                                                | 2008 |
| Nitric oxide synthesis and severity of human periodontal disease                                                                                                                                 | Batista, A. C.; Silva, T. A.; Chun, J. H.; Lara, V. S.                                                                                                                                                                                                                | 2002 |
| Postoperative complications in smoking patients treated with implants: a retrospective study                                                                                                     | Rodriguez-Argueta, Oscar Francisco; Figueiredo, Rui; Valmaseda-Castellon, Eduard; Gay-Escoda, Cosme                                                                                                                                                                   | 2011 |
| Smoking and inflammation: evidence for a synergistic role in chronic disease                                                                                                                     | Johannsen, Annsöfi; Susin, Cristiano; Gustafsson, Anders                                                                                                                                                                                                              | 2014 |
| Analysis of matrix metalloproteinases, especially MMP-8, in gingival crevicular fluid, mouthrinse and saliva for monitoring periodontal diseases                                                 | Sorsa, Timo; Gursoy, Ulvi K.; Nwhator, Solomon; Hernandez, Marcela; Tervahartiala, Taina; Leppilähti, Jussi; Gursoy, Mervi; Könönen, Eija; Emingil, Gulnur; Pussinen, Pirkko J.                                                                                       | 2016 |
| Inhibition of matrix metalloproteinase-1 by dichloromethylene bisphosphonate (clodronate)                                                                                                        | Teronen, Olli; Kontinen, Yrjö T.; Lindqvist, Christian; Salo, Tuula; Ingman, Tuula; Lauhio, Anneli; Ding, Yanli; Santavirta, Seppo; Valleala, Heikki; Sorsa, Timo                                                                                                     | 1997 |
| Host-derived biomarkers at teeth and implants in partially edentulous patients. A 10-year retrospective study                                                                                    | Ramseier, Christoph A.; Eick, Sigrun; Brönnimann, Claudia; Buser, Daniel; Brägger, Urs; Salvi, Giovanni E.                                                                                                                                                            | 2016 |
| Peri-implantitis and extracellular matrix antibodies: A case–control study                                                                                                                       | Papi, Piero; Di Carlo, Stefano; Rosella, Daniele; De Angelis, Francesca; Capogreco, Mario; Pompa, Giorgio                                                                                                                                                             | 2017 |
| Gelatinase B is associated with peri-implant bone loss                                                                                                                                           | Ma, Jian; Kitti, Uula; Hanemaaijer, Roeland; Teronen, Olli P.; Sorsa, Timo A.; Natah, Sirajedin; Tensing, Eve-Kai; Kontinen, Yrjö T.                                                                                                                                  | 2003 |
| Periodontal host modulation with antiproteinase, anti-inflammatory, and bone-sparing agents. A systematic review                                                                                 | Reddy, Michael S.; Geurs, Nico C.; Gunsolley, John C.                                                                                                                                                                                                                 | 2003 |
| Collagenase-2 (MMP-8) and collagenase-3 (MMP-13) in adult periodontitis: molecular forms and levels in gingival crevicular fluid and immunolocalisation in gingival tissue                       | Kiili, M.; Cox, S. W.; Chen, H. W.; Wahlgren, J.; Maisi, P.; Eley, B. M.; Salo, T.; Sorsa, T.                                                                                                                                                                         | 2002 |
| Matrix metalloproteinases, their physiological inhibitors and osteoclast factors are differentially regulated by the cytokine profile in human periodontal disease                               | Garlet, Gustavo P.; Martins Jr, Walter; Fonseca, Benedito AL; Ferreira, Beatriz R.; Silva, João S.                                                                                                                                                                    | 2004 |
| Mcl-1 deficiency results in peri-implantation embryonic lethality                                                                                                                                | Rinkenberger, Julie L.; Horning, Susan; Klocke, Barbara; Roth, Kevin; Korsmeyer, Stanley J.                                                                                                                                                                           | 2000 |
| Host-mediated resolution of inflammation in periodontal diseases                                                                                                                                 | Kantarci, Alpdogan; Hasturk, Hatice; Van Dyke, Thomas E.                                                                                                                                                                                                              | 2006 |
| Nitric oxide and tissue destruction                                                                                                                                                              | Kendall, H. K.; Marshall, R. I.; Bartold, P. M.                                                                                                                                                                                                                       | 2001 |
| Gingival crevicular fluid levels of RANKL and OPG in periodontal diseases: implications of their relative ratio                                                                                  | Bostanci, Nagihan; İlgenli, Tunc; Emingil, Gülnur; Afacan, Beral; Han, Buket; Töz, Hüseyin; Atilla, Gül; Hughes, Francis J.; Belibasakis, Georgios N.                                                                                                                 | 2007 |
| Patterns of chemokines and chemokine receptors expression in different forms of human periodontal disease                                                                                        | Garlet, Gustavo P.; Martins Jr, Walter; Ferreira, Beatriz R.; Milanezi, Cristiane M.; Silva, João S.                                                                                                                                                                  | 2003 |
| The effects of tobacco use on oral health                                                                                                                                                        | Sham, A. S. K.; Cheung, L. K.; Jin, L. J.; Corbet, E. F.                                                                                                                                                                                                              | 2003 |
| Expression and induction of collagenases (MMP-8 and-13) in plasma cells associated with bone-destructive lesions                                                                                 | Wahlgren, Jaana; Maisi, Päivi; Sorsa, Timo; Sutinen, Meeri; Tervahartiala, Taina; Piriälä, Emma; Teronen, Olli; Hietanen, Jarkko; Tjäderhane, Leo; Salo, Tuula                                                                                                        | 2001 |
| Role of polyethylene particles in peri-prosthetic osteolysis: A review                                                                                                                           | Atkins, Gerald J.; Haynes, David R.; Howie, Donald W.; Findlay, David M.                                                                                                                                                                                              | 2011 |
| A longitudinal study of interleukin-1 gene polymorphisms and periodontal disease in a general adult population                                                                                   | Cullinan, Mary P.; Westerman, Bill; Hamlet, Stephen M.; Palmer, Janet E.; Faddy, Malcolm J.; Lang, Niklaus P.; Seymour, Gregory J.                                                                                                                                    | 2001 |

|                                                                                                                                                                |                                                                                                                                                                                          |      |
|----------------------------------------------------------------------------------------------------------------------------------------------------------------|------------------------------------------------------------------------------------------------------------------------------------------------------------------------------------------|------|
| Basis of bone metabolism around dental implants during osseointegration and peri-implant bone loss                                                             | Insua, Angel; Monje, Alberto; Wang, Hom-Lay; Miron, Richard J.                                                                                                                           | 2017 |
| Identification of pathogen and host-response markers correlated with periodontal disease                                                                       | Ramseier, Christoph A.; Kinney, Janet S.; Herr, Amy E.; Braun, Thomas; Sugai, James V.; Shelburne, Charlie A.; Rayburn, Lindsay A.; Tran, Huu M.; Singh, Anup K.; Giannobile, William V. | 2009 |
| Peri-implant infections of oral biofilm etiology                                                                                                               | Belibasakis, Georgios N.; Charalampakis, Georgios; Bostanci, Nagihan; Stadlinger, Bernd                                                                                                  | 2015 |
| In vivo collagenase-2 (MMP-8) expression by human bronchial epithelial cells and monocytes/macrophages in bronchiectasis                                       | Prikk, Kaiu; Piriälä, Emma; Sepper, Ruth; Maisi, Päivi; Salo, Tuula; Wahlgren, Jaana; Sorsa, Timo                                                                                        | 2001 |
| Tissue inhibitor of metalloproteinases (TIMP, aka EPA): structure, control of expression and biological functions                                              | Denhardt, David T.; Feng, B. O.; Edwards, Dylan R.; Cocuzzi, Enzo T.; Malyankar, Uriel M.                                                                                                | 1993 |
| Periodontal diseases                                                                                                                                           | Kinane, Denis F.; Stathopoulou, Panagiota G.; Papapanou, Panos N.                                                                                                                        | 2017 |
| Tissue inhibitors of metalloproteinases: evolution, structure and function                                                                                     | Brew, Keith; Dinakarpandian, Deendayal; Nagase, Hideaki                                                                                                                                  | 2000 |
| Matrix metalloproteinase-8 as an inflammatory and prevention biomarker in periodontal and peri-implant diseases                                                | Al-Majid, Ahmed; Alassiri, Saeed; Rathnayake, Nilminie; Tervahartiala, Taina; Gieselmann, Dirk-Rolf; Sorsa, Timo                                                                         | 2018 |
| Investigative study of myofibroblasts and cytokines in peri-implant tissue of silicone breast expander by rt-PCR in a rat model                                | Joseph, Josna; Mohanty, Mira; Mohanan, P. V.                                                                                                                                             | 2010 |
| Peri-implant versus periodontal wound healing                                                                                                                  | Emecen-Huja, Pinar; Eubank, Tim D.; Shapiro, Vladimir; Yildiz, Vedat; Tatakis, Dimitris N.; Leblebicioglu, Binnaz                                                                        | 2013 |
| Oral fluid-based biomarkers in periodontal disease—Part 2. Gingival crevicular fluid                                                                           | AlRowis, Raed; AlMoharib, Hani S.; AlMubarak, Abdulrahman; Bhaskardoss, Jagankumar; Preethanath, R. S.; Anil, Sukumaran                                                                  | 2014 |
| Proteolytic host cell enzymes in gingival crevice fluid                                                                                                        | Uitto, Veli-Jukka; Overall, Christopher M.; McCulloch, Cristopher                                                                                                                        | 2003 |
| Oral biofilms, oral and periodontal infections, and systemic disease                                                                                           | Maddi, Abhiram; Scannapieco, Frank A.                                                                                                                                                    | 2013 |
| Diagnostic biomarkers for oral and periodontal diseases                                                                                                        | Taba, Mario; Kinney, Janet; Kim, Amy S.; Giannobile, William V.                                                                                                                          | 2005 |
| The inhibitory effect of alendronate-hydroxyapatite composite coating on wear debris-induced peri-implant high bone turnover                                   | Niu, Shun; Cao, Xiaorui; Zhang, Yan; Zhu, Qingsheng; Zhu, Jinyu                                                                                                                          | 2013 |
| Periodontal epithelium: a newly recognized role in health and disease                                                                                          | Dale, Beverly A.                                                                                                                                                                         | 2002 |
| Effect of chlorhexidine digluconate on different cell types: a molecular and ultrastructural investigation                                                     | Giannelli, M.; Chellini, F.; Margheri, M.; Tonelli, P.; Tani, A.                                                                                                                         | 2008 |
| Functional heterogeneity of osteoclasts: matrix metalloproteinases participate in osteoclastic resorption of calvarial bone but not in resorption of long bone | Everts, V.; Korper, W.; Jansen, D. C.; Steinfort, J.; Lammerse, I.; Heera, S.; Docherty, A. J. P.; Beertsen, W.                                                                          | 1999 |
| Human bone disorders: pathological role and diagnostic potential of matrix metalloproteinases                                                                  | Galliera, E.; Banfi, G.; Corsi, M. M.                                                                                                                                                    | 2010 |
| Evidence of the presence of T helper type 17 cells in chronic lesions of human periodontal disease                                                             | Cardoso, C. R.; Garlet, G. P.; Crippa, G. E.; Rosa, A. L.; Junior, W. M.; Rossi, M. A.; Silva, J. S.                                                                                     | 2009 |
| Relationship between clinical parameters and cytokine profiles in inflamed gingival tissue and serum samples from patients with chronic periodontitis          | Górska, Renata; Gregorek, Hanna; Kowalski, Jan; Laskus-Perendyk, Agnieszka; Syczewska, Małgorzata; Madaliński, Kazimierz                                                                 | 2003 |
| Immunology, microbiology, and virology following placement of NobelPerfect™ scalloped dental implants: analysis of a case series                               | Nowzari, Hessam; Yi, Klaus; Chee, Winston; Rich, Sandra K.                                                                                                                               | 2008 |
| Cytokine profile in the gingival crevicular fluid of periodontitis patients with and without type 2 diabetes: a literature review                              | Javed, Fawad; Al-Askar, Mansour; Al-Hezaimi, Khalid                                                                                                                                      | 2012 |
| Cytokines in pathogenesis of peri-implantitis                                                                                                                  | Petković-Čurčin, Aleksandra; Matić, Smiljana; Vojvodić, Danilo; Stamatović, Novak; Todorović, Tatjana                                                                                    | 2011 |
| Salivary Diagnostics—Point-of-Care diagnostics of MMP-8 in dentistry and medicine                                                                              | Rathnayake, Nilminie; Gieselmann, Dirk-Rolf; Heikkinen, Anna; Tervahartiala, Taina; Sorsa, Timo                                                                                          | 2017 |
| Expression profiling of endometrium from women with endometriosis reveals candidate genes for disease-based implantation failure and infertility               | Kao, L. C.; Germeyer, A.; Tulac, S.; Lobo, S.; Yang, J. P.; Taylor, R. N.; Osteen, K.; Lessey, B. A.; Giudice, L. C.                                                                     | 2003 |
| Effects of bisphosphonate on matrix metalloproteinase enzymes in human periodontal ligament cells                                                              | Nakaya, Hiroshi; Osawa, G.; Iwasaki, N.; Cochran, David L.; Kamo, K.; Oates, T. W.                                                                                                       | 2000 |
| Analysis of MMP-1 and MMP-9 promoter polymorphisms in early osseointegrated implant failure.                                                                   | Santos, Maria CL; Campos, Maria IG; Souza, Ana P.; Trevisatto, Paula C.; Line, Sérgio RP                                                                                                 | 2004 |
| Matrix metalloproteinases 2, 3, 8, 9, and 13 in the peri-implant soft tissues around titanium and zirconium oxide healing caps.                                | Degidi, Marco; Artese, Luciano; Franceschini, Nicola; Sulpizio, Sara; Piattelli, Adriano; Piccirilli, Marcello; Perrotti, Vittoria; Iezzi, Giovanna                                      | 2013 |
| The potential role of interleukin-17 in the immunopathology of periodontal disease                                                                             | Takahashi, Keiso; Azuma, Takashi; Motohira, Hitoshi; Kinane, D. F.; Kitetsu, Shin                                                                                                        | 2005 |
| Cytokines that promote periodontal tissue destruction                                                                                                          | Graves, Dana                                                                                                                                                                             | 2008 |
| Soluble antagonists to interleukin-1 (IL-1) and tumor necrosis factor (TNF) inhibits loss of tissue attachment in experimental periodontitis                   | Delima, A. J.; Oates, T.; Assuma, R.; Schwartz, Zvi; Cochran, D.; Amar, S.; Graves, D. T.                                                                                                | 2001 |
| Analysis of cathepsin-K levels in biologic fluids from healthy or diseased natural teeth and dental implants.                                                  | Yamalík, Nermin; Günday, Sevim; Kilinc, Kamer; Karabulut, Erdem; Berker, Ezel; Tözüm, Tolga F.                                                                                           | 2011 |
| Inhibition of the activities of matrix metalloproteinases 2, 8, and 9 by chlorhexidine                                                                         | Gendron, Renée; Grenier, Daniel; Sorsa, Timo; Mayrand, Denis                                                                                                                             | 1999 |
| Tissue inhibitors of metalloproteinases (TIMPs): their biological functions and involvement in oral disease                                                    | Verstappen, Jochem; Von den Hoff, Johannes W.                                                                                                                                            | 2006 |
| Inter-relationships between rheumatoid arthritis and periodontal disease: A review                                                                             | Mercado, Faustino B.; Marshall, R. I.; Bartold, P. M.                                                                                                                                    | 2003 |

|                                                                                                                                                                          |                                                                                                                                                                 |      |
|--------------------------------------------------------------------------------------------------------------------------------------------------------------------------|-----------------------------------------------------------------------------------------------------------------------------------------------------------------|------|
| Salivary biomarkers of bacterial burden, inflammatory response, and tissue destruction in periodontitis                                                                  | Salminen, Aino; Gursoy, Ulvi K.; Paju, Susanna; Hyvärinen, Kati; Mäntylä, Päivi; Buhlin, K/are; Könönen, Eija; Nieminen, Markku S.; Sorsa, Timo; Sinisalo, Juha | 2014 |
| Monitoring periodontal disease status in smokers and nonsmokers using a gingival crevicular fluid matrix metalloproteinase-8-specific chair-side test                    | Mäntylä, Päivi; Stenman, M.; Kinane, D.; Salo, Tuula; Suomalainen, K.; Tikanoja, S.; Sorsa, Timo                                                                | 2006 |
| Genes for extracellular-matrix-degrading metalloproteinases and their inhibitor, TIMP, are expressed during early mammalian development.                                 | Brenner, Carol A.; Adler, Richard R.; Rappolee, Daniel A.; Pedersen, Roger A.; Werb, Zena                                                                       | 1989 |
| The junctional epithelium: from health to disease                                                                                                                        | Bosshardt, D. D.; Lang, N. P.                                                                                                                                   | 2005 |
| Interleukin-1 $\beta$ , interleukin-12 and interleukin-18 levels in gingival fluid and serum of patients with gingivitis and periodontitis                               | Orozco, A.; Gemmell, E.; Bickel, M.; Seymour, G. J.                                                                                                             | 2006 |
| Mediators of periodontal osseous destruction and remodeling: principles and implications for diagnosis and therapy                                                       | McCauley, Laurie K.; Nohutcu, Rahime M.                                                                                                                         | 2002 |
| Causation and pathogenesis of periodontal disease                                                                                                                        | Kinane, Denis F.                                                                                                                                                | 2001 |
| The immunology of fibrosis: innate and adaptive responses                                                                                                                | Wick, Georg; Backovic, Aleksandar; Rabensteiner, Evelyn; Plank, Nadine; Schwentner, Christian; Sgonc, Roswitha                                                  | 2010 |
| Genomic analyses of early peri-implant bone healing in humans: a systematic review                                                                                       | Shanbhag, Siddharth; Shanbhag, Vivek; Stavropoulos, Andreas                                                                                                     | 2015 |
| Growth factor delivery for oral and periodontal tissue engineering                                                                                                       | Kaigler, Darnell; Cirelli, Joni A.; Giannobile, William V.                                                                                                      | 2006 |
| Effectiveness of Adjunctive Low-Dose Doxycycline Therapy on Clinical Parameters and Gingival Crevicular Fluid Laminin-5 $\gamma$ 2 Chain Levels in Chronic Periodontitis | Emingil, Gülnur; Atilla, Gül; Sorsa, Timo; Savolainen, Pirjo; Baylas, Haluk                                                                                     | 2004 |
| Gingival crevicular fluid matrix metalloproteinase (MMP)-7, extracellular MMP inducer, and tissue inhibitor of MMP-1 levels in periodontal disease                       | Emingil, Gülnur; Tervahartiala, Taina; Mäntylä, Päivi; Määttä, Marko; Sorsa, Timo; Atilla, Gül                                                                  | 2006 |
| Is metal particle release associated with peri-implant bone destruction? An emerging concept                                                                             | Fretwurst, T.; Nelson, K.; Tarnow, D. P.; Wang, H.-L.; Giannobile, W. V.                                                                                        | 2018 |
| Structure of periodontal tissues in health and disease                                                                                                                   | Nanci, Antonio; Bosshardt, Dieter D.                                                                                                                            | 2006 |
| Salivary biomarkers for periodontal disease diagnostics                                                                                                                  | Brinkmann, Ole; Zhang, Lei; Giannobile, William V.; Wong, David T.                                                                                              | 2011 |
| Leukemia inhibitory factor and interleukin-11: cytokines with key roles in implantation                                                                                  | Robb, Lorraine; Dimitriadis, Eva; Li, Ruili; Salamonsen, Lois A.                                                                                                | 2002 |
| Enzymatic degradation of collagen-guided tissue regeneration membranes by periodontal bacteria                                                                           | Sela, Michael N.; Kohavi, David; Krausz, Emanuela; Steinberg, Doron; Rosen, Graciela                                                                            | 2003 |
| Cyclooxygenase in biology and disease                                                                                                                                    | Dubois, Raymond N.; Abramson, Steven B.; Crofford, Leslie; Gupta, Rajnish A.; Simon, Lee S.; A. Van De Putte, Leo B.; Lipsky, Peter E.                          | 1998 |
| Lab (r)-test 3: genetic susceptibility in periodontal disease                                                                                                            | Carinci, F.; Girardi, A.; Palmieri, A.; Martinelli, M.; Scapoli, L.; Avantaggiato, A.; Nardi, G.; Lauritano, D.                                                 | 2012 |
| The host response to the microbial challenge in periodontitis: assembling the players                                                                                    | Kornman, Kenneth S.; Page, Roy C.; Tonetti, Maurizio S.                                                                                                         | 1997 |
| In situ detection of matrix metalloproteinase-9 (MMP-9) in gingival epithelium in human periodontal disease                                                              | Smith, Patricia C.; Muñoz, Valeria C.; Collados, Lucía; Oyarzún, Alejandro D.                                                                                   | 2004 |
| Human gingival fibroblasts function is stimulated on machined hydrided titanium zirconium dental implants                                                                | Gómez-Florit, M.; Xing, R.; Ramis, J. M.; Taxt-Lamollee, S.; Haugen, H. J.; Lyngstadaas, S. P.; Monjo, M.                                                       | 2014 |
| Matrix metalloproteinases in disease and repair processes in the anterior segment                                                                                        | Wong, Tina TL; Sethi, Charanjit; Daniels, Julie T.; Limb, G. Astrid; Murphy, Gillian; Khaw, Peng T.                                                             | 2002 |
| The role of T lymphocytes in bone metabolism                                                                                                                             | Weitzmann, M. Neale; Pacifici, Roberto                                                                                                                          | 2005 |
| The Effect of Subgingival Controlled-Release Delivery of Chlorhexidine Chip on Clinical Parameters and Matrix Metalloproteinase-8 Levels in Gingival Crevicular Fluid    | Azmak, Nezih; Atilla, Gül; Luoto, Hanne; Sorsa, Timo                                                                                                            | 2002 |
| Adjunctive treatment with subantimicrobial doses of doxycycline: effects on gingival fluid collagenase activity and attachment loss in adult periodontitis               | Golub, Lorne M.; McNamara, Thomas F.; Ryan, Maria E.; Kohut, Bruce; Blieden, Timothy; Payonk, Gregory; Sipos, Tibor; Baron, Hazen J.                            | 2001 |
| Osteoblast and gingival fibroblast markers in dental implant studies.                                                                                                    | Pivodova, Veronika; Frankova, Jana; Ulrichova, Jitka                                                                                                            | 2011 |
| A combination of a chemically modified doxycycline and a bisphosphonate synergistically inhibits endotoxin-induced periodontal breakdown in rats                         | Llavaneras, Analeya; Ramamurthy, Nungavaram S.; Heikkilä, Pia; Teronen, Olli; Salo, Tuula; Rifkin, Barry R.; Ryan, Maria E.; Golub, Lorne M.; Sorsa, Timo       | 2001 |
| Bone growth factors in maxillofacial skeletal reconstruction                                                                                                             | Schliephake, H.                                                                                                                                                 | 2002 |
| Implants for the aged patient: biological, clinical and sociological considerations                                                                                      | Bartold, P. Mark; Ivanovski, Saso; Darby, Ivan                                                                                                                  | 2016 |
| Gingival crevicular fluid transforming growth factor- $\beta$ 1 in several forms of periodontal disease                                                                  | Gürkan, Ali; Emingil, Gülnur; Çınarcık, Serhat; Berdeli, Afif                                                                                                   | 2006 |
| Inhibiting MMP activity prevents the development of endometriosis in the chicken chorioallantoic membrane model                                                          | Nap, Annemiek W.; Dunselman, Gerard AJ; de Goeij, Anton FPM; Evers, Johannes LH; Groothuis, Patrick G.                                                          | 2004 |
| Immunological differences and similarities between chronic periodontitis and aggressive periodontitis                                                                    | Ford, Pauline J.; Gamonal, Jorge; Seymour, Gregory J.                                                                                                           | 2010 |
| Glycation and oxidative stress in the failure of dental implants: a case series                                                                                          | Pietropaoli, Davide; Ortu, Eleonora; Severino, Marco; Ciarrocchi, Irma; Gatto, Roberto; Monaco, Annalisa                                                        | 2013 |
| Lefty is expressed in mouse endometrium in estrous cycle and peri-implantation period                                                                                    | Tang, Meiying; Xu, Yun; Julian, JoAnne; Carson, Daniel; Tabibzadeh, Siamak                                                                                      | 2005 |

|                                                                                                                                                                                                     |                                                                                                                                                                                                                                                       |      |
|-----------------------------------------------------------------------------------------------------------------------------------------------------------------------------------------------------|-------------------------------------------------------------------------------------------------------------------------------------------------------------------------------------------------------------------------------------------------------|------|
| MicroRNA signature and regulatory functions in the endometrium during normal and disease states                                                                                                     | Pan, Qun; Chegini, Nasser                                                                                                                                                                                                                             | 2008 |
| Genetic and immunological markers predict titanium implant failure: a retrospective study                                                                                                           | Jacobi-Gresser, E.; Huesker, K.; Schütt, S.                                                                                                                                                                                                           | 2013 |
| Cytokines modulate routes of collagen breakdown: Review with special emphasis on mechanisms of collagen degradation in the periodontium and the burst hypothesis of periodontal disease progression | van der Zee, Erwin; Everts, Vincent; Beertsen, Wouter                                                                                                                                                                                                 | 1997 |
| The broad effects of the functional IL-10 promoter-592 polymorphism: modulation of IL-10, TIMP-3, and OPG expression and their association with periodontal disease outcome                         | Claudino, Marcela; Trombone, Ana Paula F.; Cardoso, Cristina R.; Ferreira Jr, Samuel B.; Martins Jr, Walter; Assis, Gerson F.; Santos, Carlos F.; Trevilatto, Paula C.; Campanelli, Ana Paula; Silva, João S.                                         | 2008 |
| Detection of gingival crevicular fluid MMP-8 levels with different laboratory and chair-side methods                                                                                                | Sorsa, Timo; Hernández, M.; Leppilähti, Jussi; Munjal, S.; Netuschil, L.; Mäntylä, Päivi                                                                                                                                                              | 2010 |
| Genetic susceptibility to dental implant failure: a critical review.                                                                                                                                | Alvim-Pereira, Fabiano; Montes, Claudia C.; Mira, Marcelo T.; Trevilatto, Paula C.                                                                                                                                                                    | 2008 |
| Host modulation as a therapeutic strategy in the treatment of periodontal disease                                                                                                                   | Kornman, Kenneth S.                                                                                                                                                                                                                                   | 1999 |
| Interleukin-17 in rheumatoid arthritis: if T cells were to contribute to inflammation and destruction through synergy                                                                               | Miossec, Pierre                                                                                                                                                                                                                                       | 2003 |
| Short (6-mm) dental implants versus sinus floor elevation and placement of longer (≥ 10-mm) dental implants: a randomized controlled trial with a 3-year follow-up                                  | Bechara, Souheil; Kubilius, Ricardas; Veronesi, Giovanni; Pires, Jefferson T.; Shibli, Jamil A.; Mangano, Francesco G.                                                                                                                                | 2017 |
| The in vivo levels of matrix metalloproteinase-1 and -8 in gingival crevicular fluid during initial orthodontic tooth movement                                                                      | Apajalahti, Satu; Sorsa, Timo; Railavo, S.; Ingman, Tuula                                                                                                                                                                                             | 2003 |
| Esthetic soft tissue management for teeth and implants                                                                                                                                              | Fu, Jia-Hui; Su, Chuan-Yi; Wang, Hom-Lay                                                                                                                                                                                                              | 2012 |
| Diabetes mellitus and periodontal disease                                                                                                                                                           | Mealey, Brian L.; Ocampo, Gloria L.                                                                                                                                                                                                                   | 2007 |
| Matrix metalloproteinases in health and disease: regulation by melatonin                                                                                                                            | Swarnakar, Snehasikta; Paul, Sumit; Singh, Laishram Pradeepkumar; Reiter, Russel J.                                                                                                                                                                   | 2011 |
| Advances in periodontal disease markers                                                                                                                                                             | Ozmeric, Nurdan                                                                                                                                                                                                                                       | 2004 |
| The application of bone morphogenetic proteins to dental tissue engineering                                                                                                                         | Nakashima, Misako; Reddi, A. Hari                                                                                                                                                                                                                     | 2003 |
| Salivary biomarkers of oral health—a cross-sectional study                                                                                                                                          | Rathnayake, Nilminie; Aakerman, Sigvard; Klinge, Bjorn; Lundegren, Nina; Jansson, Henrik; Tryselius, Ylva; Sorsa, Timo; Gustafsson, Anders                                                                                                            | 2013 |
| Vascular endothelial growth factors and angiogenesis in eye disease                                                                                                                                 | Witmer, A. N.; Vrensen, GFJM; Van Noorden, C. J. F.; Schlingemann, R. O.                                                                                                                                                                              | 2003 |
| Transforming growth factors beta 1 and beta 2 are differentially expressed in fibrotic liver disease.                                                                                               | Milani, S.; Herbst, H.; Schuppan, D.; Stein, H.; Surrenti, C.                                                                                                                                                                                         | 1991 |
| Oral infections and systemic disease—an emerging problem in medicine                                                                                                                                | Rautemaa, R.; Lauhio, A.; Cullinan, M. P.; Seymour, G. J.                                                                                                                                                                                             | 2007 |
| Carvedilol decrease IL-1β and TNF-α, inhibits MMP-2, MMP-9, COX-2, and RANKL expression, and up-regulates OPG in a rat model of periodontitis                                                       | de Araujo Junior, Raimundo Fernandes; Souza, Tatiana Oliveira; de Medeiros, Caroline Addison Xavier; de Souza, Lelia Batista; de Lourdes Freitas, Maria; de Lucena, Hévio Freitas; Alves, Maria do Socorro Costa Feitosa; de Araújo, Aurigena Antunes | 2013 |
| Oral microbes, biofilms and their role in periodontal and peri-implant diseases                                                                                                                     | Lasserre, Jérôme; Brex, Michel; Toma, Selena                                                                                                                                                                                                          | 2018 |
| Gingival crevicular fluid matrix metalloproteinase-25 and -26 levels in periodontal disease                                                                                                         | Emingil, Gülnur; Kuula, Heidi; Sorsa, Timo; Atilla, Gül                                                                                                                                                                                               | 2006 |
| Role of immunohistochemical overexpression of matrix metalloproteinases MMP-2 and MMP-11 in the prognosis of death by ovarian cancer                                                                | Périgny, Martine; Bairati, Isabelle; Harvey, Isabelle; Beauchemin, Michel; Harel, François; Plante, Marie; Têtu, Bernard                                                                                                                              | 2008 |
| Plasminogen activator system in smokers and non-smokers with and without periodontal disease                                                                                                        | Buduneli, Nurcan; Buduneli, Eralp; Kardeşler, Levent; Lappin, David; Kinane, Denis F.                                                                                                                                                                 | 2005 |
| Implantation and the placenta: key pieces of the development puzzle                                                                                                                                 | Cross, James C.; Werb, Zena; Fisher, Susan J.                                                                                                                                                                                                         | 1994 |
| Host-response: understanding the cellular and molecular mechanisms of host-microbial interactions—Consensus of the Seventh European Workshop on Periodontology                                      | Kinane, Denis F.; Preshaw, Philip M.; Loos, Bruno G.; order), Working Group 2 of the Seventh European Workshop on Periodontology (in alphabetical                                                                                                     | 2011 |
| Nitric oxide synthesis is increased in periodontal disease                                                                                                                                          | Matejka, M.; Partyka, L.; Ulm, C.; Solar, P.; Sinzinger, H.                                                                                                                                                                                           | 1998 |
| Combination of bisphosphonate and tetracycline                                                                                                                                                      | Ramamurthy, Nungavarm S.; Golub, Lorne M.; Sorsa, Timo A.; Teronen, Olli P.; Salo, Tuula A.                                                                                                                                                           | 2000 |
| A histopathological investigation on the effect of systemic administration of the bisphosphonate alendronate on resorptive phase following mucoperiosteal flap surgery in the rat mandible          | Kaynak, Deniz; Meffert, Roland; Bostancı, Hamit; Günhan, Ömer; Özkaya, Özay Gököz                                                                                                                                                                     | 2003 |
| Genetic association study between Interleukin 10 gene and dental implant loss                                                                                                                       | Pigossi, Suzane C.; Alvim-Pereira, Fabiano; Montes, Cláudia C.; Finoti, Livia S.; Secolin, Rodrigo; Trevilatto, Paula C.; Scarel-Caminaga, Raquel M.                                                                                                  | 2012 |
| Identification of the osteoprotegerin/receptor activator of nuclear factor-kappa B ligand system in gingival crevicular fluid and tissue of patients with chronic periodontitis                     | Lu, H.-K.; Chen, Y.-L.; Chang, H.-C.; Li, C.-L.; Kuo, MY-P.                                                                                                                                                                                           | 2006 |
| Systemic low-dose doxycycline and alendronate administration and serum interleukin-1β, osteocalcin, and C-reactive protein levels in rats                                                           | Buduneli, Eralp; Buduneli, Nurcan; Vardar-Şengül, Saynur; Kardeşler, Levent; Atilla, Gül; Lappin, David; Kinane, Denis F.                                                                                                                             | 2005 |
| A review of tissue inhibitor of metalloproteinases-3 (TIMP-3) and experimental analysis of its effect on primary tumor growth                                                                       | Anand-Apte, Bela; Bao, Lere; Smith, Roy; Zetter, Bruce; Iwata, Kazushi; Olsen, Bjorn R.; Apte, Suneel S.                                                                                                                                              | 1996 |

|                                                                                                                                                                                                                                                                 |                                                                                                                                                                                                    |      |
|-----------------------------------------------------------------------------------------------------------------------------------------------------------------------------------------------------------------------------------------------------------------|----------------------------------------------------------------------------------------------------------------------------------------------------------------------------------------------------|------|
| Influence of implant microstructure on the osseointegration of immediate implants placed in periodontally infected sites: a histomorphometric study in dogs                                                                                                     | Novaes Jr, Arthur B.; Papalexiou, Vula; Grisi, Márcio FM; Souza, Sérgio SLS; Taba Jr, Mário; Kajiwar, João K.                                                                                      | 2004 |
| Analysis of gingival crevicular fluid as applied to the diagnosis of oral and systemic diseases                                                                                                                                                                 | Lamster, Ira B.; Ahlo, Joseph K.                                                                                                                                                                   | 2007 |
| Mechanisms and control of pathologic bone loss in periodontitis                                                                                                                                                                                                 | Bartold, P. Mark; Cantley, Melissa D.; Haynes, David R.                                                                                                                                            | 2010 |
| Matrix metalloproteinases and their inhibitors in gingival mast cells in persons with and without human immunodeficiency virus infection                                                                                                                        | Naesse, E. P.; Schreurs, O.; Helgeland, K.; Schenck, K.; Steinsvoll, S.                                                                                                                            | 2003 |
| Hyaluronic acid: A promising mediator for periodontal regeneration                                                                                                                                                                                              | Bansal, Jyoti; Kedige, Suresh D.; Anand, Samir                                                                                                                                                     | 2010 |
| Matrix Metalloproteinases & Implication in Periodontitis-A Short Review                                                                                                                                                                                         | Desarda, Hitesh; Gaikwad, Subodh                                                                                                                                                                   | 2013 |
| Neutrophil proteolytic activation cascades: a possible mechanistic link between chronic periodontitis and coronary heart disease                                                                                                                                | Alfakry, Hatem; Malle, Ernst; Koyani, Chintan N.; Pussinen, Pirkko J.; Sorsa, Timo                                                                                                                 | 2016 |
| Host-derived diagnostic markers for periodontitis: do they exist in gingival crevice fluid?                                                                                                                                                                     | Loos, Bruno G.; Tjoa, Stanley                                                                                                                                                                      | 2005 |
| Human trophoblast cultures: models for implantation and peri-implantation toxicology                                                                                                                                                                            | Genbacev, Olga; White, Tacey EK; Gavin, Claire E.; Miller, Richard K.                                                                                                                              | 1993 |
| Gelatinolytic activity in gingival crevicular fluid from teeth with periapical lesions                                                                                                                                                                          | Belmar, María José; Pabst, Carolina; Martínez, Benjamin; Hernández, Marcela                                                                                                                        | 2008 |
| Systematic review of wound healing biomarkers in peri-implant crevicular fluid during osseointegration                                                                                                                                                          | Bielemann, Amalia Machado; Marcello-Machado, Raissa Micaella; Cury, Altair Antoninha Del Bel; Faot, Fernanda                                                                                       | 2018 |
| Expression of matrix metalloproteinases-2,-8,-13,-26, and tissue inhibitors of metalloproteinase-1 in human osteosarcoma                                                                                                                                        | Korpi, Jarkko T.; Hagström, Jaana; Lehtonen, Niko; Parkkinen, Jyrki; Sorsa, Timo; Salo, Tuula; Laitinen, Minna                                                                                     | 2011 |
| Effects of scaling and root planing and sub-antimicrobial dose doxycycline on oral and systemic biomarkers of disease in patients with both chronic periodontitis and coronary artery disease                                                                   | Tüter, Gülay; Kurtiş, Bülent; Serdar, Muhittin; Aykan, Tuba; Okay, Kaan; Yücel, Aysegül; Toyman, Utku; Pinar, Selin; Cemri, Mustafa; Çengel, Atiye                                                 | 2007 |
| Detection of platelet-activating factor in gingival tissue surrounding failed dental implants                                                                                                                                                                   | Bassi, Francesco; Marchisella, Cristiano; Schierano, Gianmario; Gasser, Egon; Montrucchio, Giuseppe; Valente, Guido; Camussi, Giovanni; Preti, Giulio                                              | 2001 |
| Activation and resolution of periodontal inflammation and its systemic impact                                                                                                                                                                                   | Hasturk, Hatice; Kantarci, Alpdogan                                                                                                                                                                | 2015 |
| Changes in gingival crevicular fluid matrix metalloproteinase-8 levels during periodontal treatment and maintenance                                                                                                                                             | Kinane, D. F.; Darby, I. B.; Said, S.; Luoto, Hanne; Sorsa, Timo; Tikanoja, Sari; Mäntylä, Päivi                                                                                                   | 2003 |
| Bisphosphonates inhibit stromelysin-1 (MMP-3), matrix metalloelastase (MMP-12), collagenase-3 (MMP-13) and enamelysin (MMP-20), but not urokinase-type plasminogen activator, and diminish invasion and migration of human malignant and endothelial cell lines | Heikkilä, Pia; Teronen, Olli; Moilanen, Merja; Kontinen, Yrjö T.; Hanemaaijer, Roeland; Laitinen, Minna; Maisi, Päivi; van der Pluijm, Gabri; Bartlett, John D.; Salo, Tuula                       | 2002 |
| Influence of MMP-8 promoter polymorphism in early osseointegrated implant failure                                                                                                                                                                               | Costa-Junior, F. R.; Alvim-Pereira, C. C.; Alvim-Pereira, F.; Trevilatto, P. C.; de Souza, A. P.; Santos, Maria Cristina LG                                                                        | 2013 |
| Collagenase, gelatinase and elastase activities in sulcular fluid of osseointegrated implants and natural teeth                                                                                                                                                 | Ingman, Tuula; Könönen, Mauno; Kontinen, Yrjö T.; Siirilä, Hannu S.; Suomalainen, Kimmo; Sorsa, Timo                                                                                               | 1994 |
| Immunolocalization of the matrix metalloproteinases gelatinase B and stromelysin 1 in human endometrium throughout the menstrual cycle                                                                                                                          | Jeziorska, M.; Nagase, H.; Salamonsen, L. A.; Woolley, D. E.                                                                                                                                       | 1996 |
| Tumor targeting with a selective gelatinase inhibitor                                                                                                                                                                                                           | Koivunen, Erkki; Arap, Wadih; Valtanen, Heli; Rainisalo, Aija; Medina, Oula Penate; Heikkilä, Pia; Kantor, Carmela; Gahmberg, Carl G.; Salo, Tuula; Kontinen, Yrjö T.                              | 1999 |
| Bone remodeling biomarkers of periodontal disease in saliva                                                                                                                                                                                                     | Frodge, Brandon D.; Ebersole, Jeffrey L.; Kryscio, Richard J.; Thomas, Mark V.; Miller, Craig S.                                                                                                   | 2008 |
| Matrix metalloproteinases                                                                                                                                                                                                                                       | Nagase, Hideaki                                                                                                                                                                                    | 1996 |
| Tissue inhibitors of metalloproteinases level and collagenase activity in gingival crevicular fluid: the relevance to periodontal diseases                                                                                                                      | Nomura, T.; Ishii, A.; Oishi, Y.; Kohma, H.; Hara, K.                                                                                                                                              | 1998 |
| Transcriptomes in healthy and diseased gingival tissues                                                                                                                                                                                                         | Demmer, Ryan T.; Behle, Jan H.; Wolf, Dana L.; Handfield, Martin; Kerschull, Moritz; Celenti, Romanita; Pavlidis, Paul; Papapanou, Panos N.                                                        | 2008 |
| What are the local and systemic biological reactions and mediators to wear debris and what host factors determine or modulate the biological response to wear particles?                                                                                        | Tuan, Rocky S.; Lee, Francis Young-In; Kontinen, Yrjö; Wilkinson, J. Mark; Smith, R. Lane                                                                                                          | 2008 |
| Modulating the effects of diabetes on osseointegration with aminoguanidine and doxycycline                                                                                                                                                                      | Kopman, Jeffrey A.; Kim, David M.; Rahman, Suraiya S.; Arandia, Jason A.; Karimbux, Nadeem Y.; Fiorellini, Joseph P.                                                                               | 2005 |
| Assessing osteolysis with use of high-throughput protein chips                                                                                                                                                                                                  | Shanbhag, Arun S.; Kaufman, Adam M.; Hayata, Koichiro; Rubash, Harry E.                                                                                                                            | 2007 |
| Modulation of matrix metalloproteinase activities in periodontitis as a treatment strategy                                                                                                                                                                      | Ryan, Maria Emanuel; Golub, Lorne M.                                                                                                                                                               | 2000 |
| Comparison of peri-implant clinical and radiographic status around short (6 mm in length) dental implants placed in cigarette-smokers and never-smokers: Six-year follow-up results                                                                             | Abduljabbar, Tariq; Al-Hamoudi, Nawwaf; Al-Sowygh, Zeyad H.; Alajmi, Mohammed; Javed, Fawad; Vohra, Fahim                                                                                          | 2018 |
| Nitric oxide induces gelatinase A (matrix metalloproteinase 2) during rat embryo implantation                                                                                                                                                                   | Novaro, Virginia; Pustovrh, Carolina; Colman-Lerner, Alejandro; Radisky, Derek; Nostro, Fabiana Lo; Paz, Dante; Jawerbaum, Alicia; González, Elida                                                 | 2002 |
| A role for non-antimicrobial actions of tetracyclines in combating oxidative stress in periodontal and metabolic diseases: a literature review                                                                                                                  | Soory, M.                                                                                                                                                                                          | 2008 |
| Oral fluid matrix metalloproteinase (MMP)-8 as a diagnostic tool in chronic periodontitis                                                                                                                                                                       | Hernández-Ríos, Patricia; Hernández, Marcela; Garrido, Mauricio; Tervahartiala, Taina; Leppilähti, J.; Kuula, Heidi; Heikkinen, Anna Maria; Mäntylä, Päivi; Rathnayake, Nilminie; Nwhator, Solomon | 2016 |

|                                                                                                                                                                                                                                         |                                                                                                                                                                                                                                                    |      |
|-----------------------------------------------------------------------------------------------------------------------------------------------------------------------------------------------------------------------------------------|----------------------------------------------------------------------------------------------------------------------------------------------------------------------------------------------------------------------------------------------------|------|
| Differences between inflammatory and catabolic mediators of peri-implantitis and periodontitis lesions following initial mechanical therapy: An exploratory study                                                                       | Ghighi, M.; Llorens, A.; Baroukh, B.; Chaussain, C.; Bouchard, P.; Gosset, M.                                                                                                                                                                      | 2018 |
| Bone cells dynamics during peri-implantitis: a theoretical analysis                                                                                                                                                                     | Fernandes, Maria Helena; de Sousa Gomes, Pedro                                                                                                                                                                                                     | 2016 |
| Could the defects in the endometrial extracellular matrix during the implantation be a cause for impaired fertility?                                                                                                                    | Skrzypczak, Jana; Wirstlein, Przemysław; Mikolajczyk, Mateusz                                                                                                                                                                                      | 2007 |
| Toll-like receptors and their role in periodontal health and disease                                                                                                                                                                    | Mahanonda, Rangsin; Pichyangkul, Sathit                                                                                                                                                                                                            | 2007 |
| Novel biological strategies for treatment of wear particle-induced periprosthetic osteolysis of orthopaedic implants for joint replacement                                                                                              | Goodman, S. B.; Gibon, E.; Pajarinen, J.; Lin, T.-H.; Keeney, M.; Ren, P.-G.; Nich, C.; Yao, Z.; Egashira, Kensuke; Yang, F.                                                                                                                       | 2014 |
| Increased local matrix metalloproteinase-8 expression in the periodontal connective tissues of smokers with periodontal disease                                                                                                         | Liu, K.-Z.; Hynes, A.; Man, A.; Alsagheer, A.; Singer, D. L.; Scott, D. A.                                                                                                                                                                         | 2006 |
| Evaluation of peri-implant mucosa: Clinical, histopathological and immunological aspects                                                                                                                                                | de Araujo, Marcia Fernandes; Leao Filho, Antonio Ferreira; da Silva, Gabriela Pegorari; de Melo, Marcelo Luiz Ribeiro; Napimoga, Marcelo Henrique; Rodrigues, Denise Bertulucci Rocha; Alves, Polyanna Miranda; de Lima Pereira, Sanivia Aparecida | 2014 |
| Risk factors that may modify the innate and adaptive immune responses in periodontal diseases                                                                                                                                           | Knight, Ellie T.; Liu, Jenny; Seymour, Gregory J.; Faggion Jr, Clovis M.; Cullinan, Mary P.                                                                                                                                                        | 2016 |
| Release of bone markers in immediately loaded and nonloaded dental implants: a randomized clinical trial                                                                                                                                | Prati, A. J.; Casati, M. Z.; Ribeiro, F. V.; Cirano, F. R.; Pastore, G. P.; Pimentel, S. P.; Casarin, R. C. V.                                                                                                                                     | 2013 |
| Molecular aspects of the pathogenesis of periodontitis                                                                                                                                                                                  | Meyle, Joerg; Chapple, Iain                                                                                                                                                                                                                        | 2015 |
| Matrix metalloproteinase-8 levels and elastase activities in gingival crevicular fluid from chronic adult periodontitis patients                                                                                                        | Chen, H. Y.; Cox, S. W.; Eley, B. M.; Mäntylä, P.; Rönkä, Hanne; Sorsa, Timo                                                                                                                                                                       | 2000 |
| Markers of inflammation and cardiovascular disease: application to clinical and public health practice: a statement for healthcare professionals from the Centers for Disease Control and Prevention and the American Heart Association | Pearson, Thomas A.; Mensah, George A.; Alexander, R. Wayne; Anderson, Jeffrey L.; Cannon III, Richard O.; Criqui, Michael; Fadl, Yazid Y.; Fortmann, Stephen P.; Hong, Yuling; Myers, Gary L.                                                      | 2003 |
| cDNA sequence and mRNA tissue distribution of a novel human matrix metalloproteinase with a potential transmembrane segment                                                                                                             | Will, Horst; Hinzmann, Bernd                                                                                                                                                                                                                       | 1995 |
| Wear particulate and osteolysis                                                                                                                                                                                                         | Goodman, Stuart                                                                                                                                                                                                                                    | 2005 |
| Increased collagen degradation around loosened total hip replacement implants                                                                                                                                                           | Ma, Guo-Feng; Ali, Ahmed; Verzijl, Nicole; Hanemaaijer, Roeland; TeKoppele, Johan; T. Kontinen, Yrjö; Salo, Jari                                                                                                                                   | 2006 |
| Mechanisms of disease: Molecular insights into aseptic loosening of orthopedic implants                                                                                                                                                 | Drees, Philipp; Eckardt, Anke; Gay, Renate E.; Gay, Steffen; Huber, Lars C.                                                                                                                                                                        | 2007 |
| Immunoregulatory control of Th1/Th2 cytokine profiles in periodontal disease                                                                                                                                                            | Gemmell, Erica; Seymour, Gregory J.                                                                                                                                                                                                                | 2004 |
| Relationship of tooth mortality and implant treatment in Type 2 diabetes mellitus patients in Korean adults                                                                                                                             | Jung, Hyun-Yub; Kim, Yong-Gun; Jin, Myoung-Uk; Cho, Jin-Hyun; Lee, Jae-Mok                                                                                                                                                                         | 2013 |
| Smoking modulates gene expression of type I collagen, bone sialoprotein, and osteocalcin in human alveolar bone                                                                                                                         | de Campos, Juliana Medeiros; Prati, Alexandre Javaroni; Cirano, Fabiano Ribeiro; Pimentel, Suzana Peres; Pastore, Gabriel Pires; Pecorari, Vanessa Gallego; Ribeiro, Fernanda Vieira; Casati, Marcio Zaffalon; Casarin, Renato Corrêa Viana        | 2015 |
| The effect of adjunctive low-dose doxycycline therapy on clinical parameters and gingival crevicular fluid matrix metalloproteinase-8 levels in chronic periodontitis                                                                   | Emingil, Gülnur; Atila, Gül; Sorsa, Timo; Luoto, Hanne; Kirilmaz, Levent; Baylas, Haluk                                                                                                                                                            | 2004 |
| Non-antibacterial tetracycline formulations: host-modulators in the treatment of periodontitis and relevant systemic diseases                                                                                                           | Golub, Lorne M.; Elburki, Muna S.; Walker, Clay; Ryan, Maria; Sorsa, Timo; Tenenbaum, Howard; Goldberg, Michael; Wolff, Mark; Gu, Ying                                                                                                             | 2016 |
| Effect of locally delivered minocycline microspheres on markers of bone resorption                                                                                                                                                      | Oringer, R. J.; Al-Shammari, K. F.; Aldredge, W. A.; Iacono, V. J.; Eber, R. M.; Wang, H. L.; Berwald, B.; Nejat, R.; Giannobile, W. V.                                                                                                            | 2002 |
| Increased expression of toll-like receptors in aseptic loose periprosthetic tissues and septic synovial membranes around total hip implants                                                                                             | Tamaki, Yasunobu; Takakubo, Yuya; Goto, Kaoru; Hirayama, Tomoyuki; Sasaki, Kan; Kontinen, Yrjö T.; Goodman, Stuart B.; Takagi, Michiaki                                                                                                            | 2009 |
| MMP-9 inhibition suppresses wear debris-induced inflammatory osteolysis through downregulation of RANK/RANKL in a murine osteolysis model                                                                                               | Chen, Desheng; Zhang, Xianlong; Guo, Yongyuan; Shi, Sifeng; Mao, Xin; Pan, Xiaoyun; Cheng, Tao                                                                                                                                                     | 2012 |
| LIF and IL11 in trophoblast-endometrial interactions during the establishment of pregnancy                                                                                                                                              | Dimitriadis, E.; Menkhurst, E.; Salamonsen, L. A.; Paiva, PLIF                                                                                                                                                                                     | 2010 |
| Gingival crevicular fluid as a periodontal diagnostic indicator-I: Host derived enzymes and tissue breakdown products                                                                                                                   | Gupta, G.                                                                                                                                                                                                                                          | 2012 |
| Predictive factors for maxillary sinus augmentation outcomes: A case series analysis                                                                                                                                                    | Galindo-Moreno, Pablo; Moreno-Riestra, Ildefonso; Ávila-Ortiz, Gustavo; Padial-Molina, Miguel; Gallas-Torreira, Mercedes; Sánchez-Fernández, Elena; Mesa, Francisco; Wang, Hom-Lay; O'Valle, Francisco                                             | 2012 |
| Cranberry proanthocyanidins inhibit MMP production and activity                                                                                                                                                                         | La, V. D.; Howell, A. B.; Grenier, D.                                                                                                                                                                                                              | 2009 |
| Role of mechanical curettage with and without adjunct antimicrobial photodynamic therapy in the treatment of peri-implant mucositis in cigarette smokers: A randomized controlled clinical trial                                        | Javed, Fawad; BinShabaib, Munerah Saleh; Alharthi, Shatha Subhi; Qadri, Talat                                                                                                                                                                      | 2017 |
| Salivary osteocalcin levels are decreased in smoker chronic periodontitis patients                                                                                                                                                      | Özçaka, Ö.; Nalbantsoy, A.; Buduneli, N.                                                                                                                                                                                                           | 2011 |
| Altered expression of HOXA10 in endometriosis: potential role in decidualization                                                                                                                                                        | Kim, J. Julie; Taylor, H. S.; Lu, Z.; Ladhani, O.; Hastings, J. M.; Jackson, K. S.; Wu, Y.; Guo, S. W.; Fazleabas, A. T.                                                                                                                           | 2007 |

|                                                                                                                                                                                                                                   |                                                                                                                                                                           |      |
|-----------------------------------------------------------------------------------------------------------------------------------------------------------------------------------------------------------------------------------|---------------------------------------------------------------------------------------------------------------------------------------------------------------------------|------|
| Risk factors for periodontal disease                                                                                                                                                                                              | Genco, Robert J.; Borgnakke, Wenche S.                                                                                                                                    | 2013 |
| Nitric oxide synthase distribution during implantation in the mouse                                                                                                                                                               | Purcell, T. L.; Given, R.; Chwalisz, K.; Garfield, R. E.                                                                                                                  | 1999 |
| Granulocyte elastase, matrix metalloproteinase-8 and prostaglandin E2 in gingival crevicular fluid in matched clinical sites in smokers and non-smokers with persistent periodontitis                                             | Söder, B.; Jin, L. J.; Wickholm, S.                                                                                                                                       | 2002 |
| The roles of cyclooxygenase-2 and prostaglandin E2 in periodontal disease                                                                                                                                                         | Noguchi, Kazuyuki; Ishikawa, Isao                                                                                                                                         | 2007 |
| The signals and molecular pathways involved in implantation, a symbiotic interaction between blastocyst and endometrium involving adhesion and tissue invasion                                                                    | Tabibzadeh, S.; Babaknia, A.                                                                                                                                              | 1995 |
| The role of osteoblasts in peri-prosthetic osteolysis                                                                                                                                                                             | O'Neill, S. C.; Queally, J. M.; Devitt, B. M.; Doran, P. P.; O'Byrne, J. M.                                                                                               | 2013 |
| Expression of Cystatin C in the rat endometrium during the peri-implantation period                                                                                                                                               | Quinn, Claire E.; Simmons, David G.; Kennedy, Thomas G.                                                                                                                   | 2006 |
| Oral microcirculation observed in vivo by videocapillaroscopy: a review                                                                                                                                                           | Scardina, Giuseppe A.; Ruggieri, Alessia; Messina, Pietro                                                                                                                 | 2009 |
| Clinical and biochemical effects of diode laser as an adjunct to nonsurgical treatment of chronic periodontitis: a randomized, controlled clinical trial                                                                          | Saglam, Mehmet; Kantarci, Alpdogan; Dundar, Niyazi; Hakki, Sema S.                                                                                                        | 2014 |
| Metalloproteinases and wound healing                                                                                                                                                                                              | Caley, Matthew P.; Martins, Vera LC; O'Toole, Edel A.                                                                                                                     | 2015 |
| Comparing biocompatibility of gingival fibroblasts and bacterial strains on a different modified titanium discs                                                                                                                   | Franková, Jana; Pivodová, Veronika; Růžicka, Filip; Tománková, Kateřina; Šafařová, Klára; Vrbková, Jana; Ulrichová, Jitka                                                 | 2013 |
| Oral wound healing: cell biology and clinical management                                                                                                                                                                          | Larjava, Hannu                                                                                                                                                            | 2012 |
| The use of rodent models to investigate host-bacteria interactions related to periodontal diseases                                                                                                                                | Graves, Dana T.; Fine, Daniel; Teng, Yen-Tung A.; Van Dyke, Thomas E.; Hajishengallis, George                                                                             | 2008 |
| Quercitrin-nanocoated titanium surfaces favour gingival cells against oral bacteria                                                                                                                                               | Gomez-Florit, Manuel; Pacha-Olivenza, Miguel A.; Fernández-Calderón, Maria C.; Córdoba, Alba; González-Martín, Maria L.; Monjo, Marta; Ramis, Joana M.                    | 2016 |
| ER stress mediates TiAl6V4 particle-induced peri-implant osteolysis by promoting RANKL expression in fibroblasts                                                                                                                  | Wang, Zhenheng; Liu, Naicheng; Shi, Tongguo; Zhou, Gang; Wang, Zhenzhen; Gan, Jingjing; Guo, Ting; Qian, Hongbo; Bao, Nirong; Zhao, Jianning                              | 2015 |
| Pathological analyses of long-term intracoronary Palmaz-Schatz stenting: Is its efficacy permanent?                                                                                                                               | Inoue, Katsumi; Abe, Kenichi; Ando, Kenji; Shirai, Shinichi; Nishiyama, Kei; Nakanishi, Michio; Yamada, Takashi; Sakai, Koyu; Nakagawa, Yoshihisa; Hamasaki, Naoya        | 2004 |
| Profiles of matrix metalloproteinases and their tissue inhibitors in intraperitoneal drainage fluid: relationship to wound healing                                                                                                | Baker, Elizabeth A.; Leaper, David J.                                                                                                                                     | 2003 |
| Macrophage interactions with modified material surfaces                                                                                                                                                                           | Thomsen, Peter; Gretzer, Christina                                                                                                                                        | 2001 |
| Levels of metalloproteinase-2 and -9 and tissue inhibitor of matrix metalloproteinase-1 in gingival crevicular fluid of patients with periodontitis, gingivitis, and healthy gingiva.                                             | Maeso, Gema; Bravo, Manuel; Bascones, Antonio                                                                                                                             | 2007 |
| Cloning and expression analyses of mouse dystroglycan gene: specific expression in maternal decidua at the peri-implantation stage                                                                                                | Yotsumoto, Shinichi; Fujiwara, Hiroyuki; Horton, Joseph H.; Mosby, Tracy A.; Wang, Xueqian; Cui, Yushun; Ko, Minoru SH                                                    | 1996 |
| Matrix metalloproteinase-1 of gingival fibroblasts influenced by advanced glycation end products (AGEs) and their association with receptor for AGEs and nuclear factor- $\kappa$ B in gingival connective tissue                 | Yu, Shaojie; Li, Huajing; Ma, Ying; Fu, Yun                                                                                                                               | 2012 |
| Serum, saliva, and gingival crevicular fluid osteocalcin: their relation to periodontal status and bone mineral density in postmenopausal women                                                                                   | Bullon, Pedro; Goberna, Berta; Guerrero, Juan M.; Segura, Juan J.; Perez-Cano, Ramon; Martínez-Sahuquillo, Angel                                                          | 2005 |
| Independent regulation of matrix metalloproteinase-9, tissue inhibitor of metalloproteinase-1 (TIMP-1), and TIMP-3 in human endometrial stromal cells by gonadotropin-releasing hormone: implications in early human implantation | Raga, Francisco; Casañ, Eva Maria; Wen, Yan; Huang, Hong-Yuan; Bonilla-Musoles, Fernando; Polan, Mary Lake                                                                | 1999 |
| Basic aspects of implantation                                                                                                                                                                                                     | Guzeloglu-Kayisli, Ozlem; Basar, Murat; Arici, Aydin                                                                                                                      | 2007 |
| Perioceutics: Matrix metalloproteinase inhibitors as an adjunctive therapy for inflammatory periodontal disease                                                                                                                   | Honibald, Esther Nalini; Mathew, Sebeena; Padmanaban, Jeyantha; Sundaram, Elanchezhian; Ramamoorthy, Renuka Devi                                                          | 2012 |
| Inflammatory pathways in female reproductive health and disease                                                                                                                                                                   | Jabbour, Henry; Sales, Kurt; Catalano, Roberto; Norman, Jane                                                                                                              | 2009 |
| The Effects of Selective COX-2 Inhibitor/Celecoxib and Omega-3 Fatty Acid on Matrix Metalloproteinases, TIMP-1, and Laminin-5 $\gamma$ 2-Chain Immunolocalization in Experimental Periodontitis                                   | Vardar-Sengul, Saynur; Buduneli, Eralp; Turkoglu, Oya; Buduneli, Nurcan; Atilla, Gül; Wahlgren, Jaana; Sorsa, Timo; Baylas, Haluk                                         | 2008 |
| Anti-inflammatory cytokines in peri-implant soft tissues: A preliminary study on humans using cDNA microarray technology                                                                                                          | Bambini, F.; Pellicchia, M.; Memè, L.; Santarelli, A.; Emanuelli, M.; Procaccini, M.; Muzio, L. Lo                                                                        | 2007 |
| Gingival crevicular fluid matrix metalloproteinase-8 levels following adjunctive use of meloxicam and initial phase of periodontal therapy                                                                                        | Buduneli, Nurcan; Vardar, Saynur; Atilla, Gül; Sorsa, Timo; Luoto, Hanne; Baylas, Haluk                                                                                   | 2002 |
| Synergistic interactions of blood-borne immune cells, fibroblasts and extracellular matrix drive repair in an in vitro peri-implant wound healing model                                                                           | Burkhardt, Melanie A.; Waser, Jasmin; Milleret, Vincent; Gerber, Isabel; Emmert, Maximilian Y.; Foolen, Jasper; Hoerstrup, Simon P.; Schlottig, Falko; Vogel, Viola       | 2016 |
| Filifactor alocis—a new emerging periodontal pathogen                                                                                                                                                                             | Aruni, A. Wilson; Mishra, Arunima; Dou, Yuetan; Chioma, Ozioma; Hamilton, Brittany N.; Fletcher, Hansel M.                                                                | 2015 |
| Inhibition of matrix metalloproteinase-14 in osteosarcoma cells by clodronate                                                                                                                                                     | Heikkilä, Pia; Teronen, Olli; Hirn, Martti Y.; Sorsa, Timo; Tervahartiala, Taina; Salo, Tuula; Kontinen, Yrjö T.; Halttunen, Tuula; Moilanen, Merja; Hanemaaijer, Roeland | 2003 |
| Systems and methods for coating a dental appliance                                                                                                                                                                                | Li, Chunhua; Tricca, Robert; Dinh, Huong; Wu, Benjamin; Carlyle, Wenda                                                                                                    | 2006 |

|                                                                                                                                                                                               |                                                                                                                                                                                                    |      |
|-----------------------------------------------------------------------------------------------------------------------------------------------------------------------------------------------|----------------------------------------------------------------------------------------------------------------------------------------------------------------------------------------------------|------|
| The role of matrix metalloproteinases (MMPs) in human caries                                                                                                                                  | Chaussain-Miller, C.; Fioretti, F.; Goldberg, M.; Menashi, S.                                                                                                                                      | 2006 |
| Effectiveness of scaling and root planing versus modified Widman flap on nitric oxide synthase and arginase activity in patients with chronic periodontitis                                   | Güllü, Cigdem; Ozmeric, Nurdan; Tokman, Benay; Elgün, Serenay; Balos, Köksal                                                                                                                       | 2005 |
| The effects on bone cells of metal ions released from orthopaedic implants. A review                                                                                                          | Sansone, Valerio; Pagani, Davide; Melato, Marco                                                                                                                                                    | 2013 |
| Diagnostic method for detection of periodontitis or peri-implantitis                                                                                                                          | Golub, Lorne M.; Sorsa, Timo; Teronen, Olli; Tikanoja, Sari Hannele                                                                                                                                | 2001 |
| Anti-inflammatory effects of <i>Lactobacillus brevis</i> (CD2) on periodontal disease                                                                                                         | Riccia, DN Della; Bizzini, F.; Perilli, M. G.; Polimeni, A.; Trinchieri, V.; Amicosante, Gianfranco; Cifone, MARIA GRAZIA                                                                          | 2007 |
| Increased expression of a novel osteoclast-stimulating factor, ADAM8, in interface tissue around loosened hip prostheses.                                                                     | Mandelin, Jami; Li, Tian-Fang; Hukkanen, Mika VJ; Liljeström, Mikko; Chen, Zhan-Kun; Santavirta, Seppo; Kitti, Uula; Kontinen, Yrjö T.                                                             | 2003 |
| The influence of hydrosalpinx on markers of endometrial receptivity                                                                                                                           | Savaris, Ricardo Francalacci; Giudice, Linda C.                                                                                                                                                    | 2007 |
| Chemokines in human periodontal disease tissues                                                                                                                                               | Gemmell, E.; Carter, C. L.; Seymour, G. J.                                                                                                                                                         | 2001 |
| Profiling of differentially expressed genes in peri-implantitis and periodontitis in vivo by microarray analysis                                                                              | Roediger, Matthias; Miró, Xavier; Geffers, Robert; Irmer, Malte; Huels, Alfons; Miosge, Nicolai; Gersdorff, Nikolaus                                                                               | 2009 |
| GCF IL-1 $\beta$ profiles in periodontal disease                                                                                                                                              | Engelbreton, Steven P.; Grbic, John T.; Singer, Robert; Lamster, Ira B.                                                                                                                            | 2002 |
| Cellular source, activation and inhibition of dental plaque collagenase                                                                                                                       | Sorsa, Timo; Ding, Yan-Li; Ingman, Tuula; Salo, Tuula; Westerlund, Ulla; Haapasalo, Markus; Tschesche, Harald; Kontinen, Yrjö T.                                                                   | 1995 |
| Matrix metalloproteinase inhibitors as therapy for inflammatory and vascular diseases                                                                                                         | Hu, Jialiang; Van den Steen, Philippe E.; Sang, Qing-Xiang A.; Oudenakker, Ghislain                                                                                                                | 2007 |
| Peri-implant disease: pathogenesis, diagnosis and treatment in view of both inflammation and oxidative stress profiling                                                                       | Liskmann, Stanislav                                                                                                                                                                                | 2006 |
| Herpesviral-bacterial interactions in periodontal diseases                                                                                                                                    | Slots, Jørgen                                                                                                                                                                                      | 2010 |
| EMMPRIN/CD147, an MMP modulator in cancer, development and tissue repair                                                                                                                      | Gabison, Eric E.; Hoang-Xuan, Thanh; Mauviel, Alain; Menashi, Suzanne                                                                                                                              | 2005 |
| Differential regulation of MMP-13 expression in two models of experimentally induced periodontal disease in rats                                                                              | de Aquino, Sabrina Garcia; Guimaraes, Morgana Rodrigues; Stach-Machado, Dagmar Ruth; da Silva, Juliete Aparecida Francisco; Spolidorio, Luís Carlos; Rossa Jr, Carlos                              | 2009 |
| Inhibition of alveolar bone loss by matrix metalloproteinase inhibitors in experimental periodontal disease                                                                                   | Ramamurthy, Nungavaram S.; Xu, Jing-wen; Bird, John; Baxter, Andrew; Bhogal, Ranjev; Wills, Ruth; Watson, Bob; Owen, David; Wolff, Mark; Greenwald, Robert A.                                      | 2002 |
| Probiotic effects of orally administered <i>Lactobacillus reuteri</i> -containing tablets on the subgingival and salivary microbiota in patients with gingivitis. A randomized clinical trial | Inieta, Margarita; Herrera, David; Montero, Eduardo; Zurbriggen, Milena; Matos, Ana R.; Marin, María J.; Sánchez-Beltrán, Mari C.; Llana-Palacio, Arancha; Sanz, Mariano                           | 2012 |
| Leukaemia inhibitory factor in implantation and uterine biology                                                                                                                               | Kimber, Susan J.                                                                                                                                                                                   | 2005 |
| Periprosthetic osteolysis: genetics, mechanisms and potential therapeutic interventions                                                                                                       | Noordin, Shahryar; Masri, Bassam                                                                                                                                                                   | 2012 |
| Matrix metalloproteinase 8 (MMP8) gene polymorphisms in chronic periodontitis                                                                                                                 | Holla, L. Izakovicova; Hrdlickova, B.; Vokurka, J.; Fassmann, A.                                                                                                                                   | 2012 |
| Implantation, trophoblast differentiation and haemochorial placentation: mechanistic evidence in vivo and in vitro                                                                            | Aplin, John D.                                                                                                                                                                                     | 1991 |
| Cloning of MMP-26: A novel matrilysin-like proteinase                                                                                                                                         | Benoit de Coignac, Amélie; Elson, Greg; Delneste, Yves; Magistrelli, Giovanni; Jeannin, Pascale; Aubry, Jean-Pierre; Berthier, Odile; Schmitt, Daniel; Bonnefoy, Jean-Yves; Gauchat, Jean-François | 2000 |
| Interleukin 1 $\beta$ levels around microscrew implants during orthodontic tooth movement                                                                                                     | Sari, Emel; Uçar, Cihan                                                                                                                                                                            | 2007 |
| What other biologic and mechanical factors might contribute to osteolysis?                                                                                                                    | Greenfield, Ed M.; Bechtold, Joan                                                                                                                                                                  | 2008 |
| Soft and hard tissue response to endosseous dental implants                                                                                                                                   | Listgarten, Max A.                                                                                                                                                                                 | 1996 |
| Significance of circulating and crevicular matrix metalloproteinase-9 in rheumatoid arthritis-chronic periodontitis association                                                               | Silosi, Isabela; Cojocaru, Manole; Foia, Lili; Boldeanu, Mihail Virgil; Petrescu, Florin; Surlin, Petra; Biciusca, Viorel                                                                          | 2015 |
| The role of macrophages in osteolysis of total joint replacement                                                                                                                              | Ingham, Eileen; Fisher, John                                                                                                                                                                       | 2005 |
| Serum and salivary matrix metalloproteinases, neutrophil elastase, myeloperoxidase in patients with chronic or aggressive periodontitis                                                       | Nizam, Nejat; Gümüş, Pınar; Pitkänen, Jari; Tervahartiala, Taina; Sorsa, Timo; Buduneli, Nurcan                                                                                                    | 2014 |
| Drugs, medications and periodontal disease                                                                                                                                                    | Heasman, P. A.; Hughes, F. J.                                                                                                                                                                      | 2014 |
| <i>Actinobacillus actinomycetemcomitans</i> lipopolysaccharide-mediated experimental bone loss model for aggressive periodontitis                                                             | Rogers, Jill E.; Li, Fei; Coatney, Derek D.; Rossa Jr, Carlos; Bronson, Paul; Krieder, Jaclynn M.; Giannobile, William V.; Kirkwood, Keith L.                                                      | 2007 |
| Smoking increases salivary arginase activity in patients with dental implants                                                                                                                 | Queiroz, D. A.; Cortelli, J. R.; Holzhausen, M.; Rodrigues, E.; Aquino, D. R.; Saad, W. A.                                                                                                         | 2009 |
| Cytokines, implantation and early abortion: re-examining the Th1/Th2 paradigm leads to question the single pathway, single therapy concept                                                    | Chaouat, Gérard; Lédée-Bataille, Nathalie; Zourbas, Sandrine; Ostojic, Sasa; Dubanchet, Sylvie; Martal, Jacques; Frydman, René                                                                     | 2003 |
| The influence of a probiotic milk drink on the development of gingivitis: a pilot study                                                                                                       | Staab, Benedict; Eick, Sigrun; Knöfler, Gerhild; Jentsch, Holger                                                                                                                                   | 2009 |



|                                                                                                                                                                                                                                   |                                                                                                                                                                         |      |
|-----------------------------------------------------------------------------------------------------------------------------------------------------------------------------------------------------------------------------------|-------------------------------------------------------------------------------------------------------------------------------------------------------------------------|------|
| MMP-9 and CD68+ cells are required for tissue remodeling in response to natural hydroxyapatite                                                                                                                                    | Zambuzzi, Willian F.; Paiva, Katiúcia BS; Menezes, Renato; Oliveira, Rodrigo C.; Taga, Rumio; Granjeiro, José M.                                                        | 2009 |
| Simultaneous effects of nicotine, acrolein, and acetaldehyde on osteogenic-induced bone marrow cells cultured on plasma-sprayed titanium implants.                                                                                | Pereira, Maria L.; Carvalho, João C.; Peres, Fernando; Fernandes, Maria H.                                                                                              | 2010 |
| Serologic and histologic findings in patients with capsular contracture after breast augmentation with smooth silicone gel implants: is serum hyaluronan a potential predictor?                                                   | Prantl, L.; Pöppl, N.; Horvat, N.; Heine, N.; Eisenmann-Klein, M.                                                                                                       | 2005 |
| In vivo effects of rosiglitazone in a human neuroblastoma xenograft                                                                                                                                                               | Cellai, I.; Petrangolini, G.; Tortoreto, M.; Pratesi, G.; Luciani, P.; Deledda, C.; Benvenuti, S.; Ricordati, C.; Gelmini, S.; Ceni, E.                                 | 2010 |
| Gene encoding a novel murine tissue inhibitor of metalloproteinases (TIMP), TIMP-3, is expressed in developing mouse epithelia, cartilage, and muscle, and is located on mouse chromosome 10                                      | Apte, Suneel S.; Hayashi, Kimiko; Seldin, Michael F.; Mattei, Marie-Genevieve; Hayashi, Masando; Olsen, Bjorn R.                                                        | 1994 |
| Aseptic loosening of total joint replacements: mechanisms underlying osteolysis and potential therapies                                                                                                                           | Abu-Amer, Yousef; Darwech, Isra; Clohisy, John C.                                                                                                                       | 2007 |
| Osseointegrated implant failure associated with MMP-1 promotor polymorphisms (-1607 and-519).                                                                                                                                     | Leite, Mayra FF; Santos, Maria CLG; de Souza, Ana P.; Line, Sergio RP                                                                                                   | 2008 |
| Matrix metalloproteinases (MMP-8 and-9) and neutrophil elastase in gingival crevicular fluid of cyclosporin-treated patients                                                                                                      | Atilla, Gül; Sorsa, Timo; Rönka, Hanne; Emingil, Gülnur                                                                                                                 | 2001 |
| Are collagens the culprits in the development of incisional and inguinal hernia disease?                                                                                                                                          | Klinge, U.; Binnebösel, M.; Mertens, P. R.                                                                                                                              | 2006 |
| Identification of key genes and pathways for peri-implantitis through the analysis of gene expression data                                                                                                                        | Zhang, Huang; Zhang, Xiong; Huang, Jie; Fan, Xusheng                                                                                                                    | 2017 |
| Relationship between periodontitis and diabetes: lessons from rodent studies                                                                                                                                                      | Andersen, Carla C. Pontes; Flyvbjerg, Allan; Buschard, Karsten; Holmstrup, Palle                                                                                        | 2007 |
| Periodontal pathogen-related stimulation indicates unique phenotype of primary cultured human fibroblasts from gingiva and periodontal ligament: implications for oral health disease                                             | Koka, Sreenivas; Reinhardt, Richard A.                                                                                                                                  | 1997 |
| Periodontal diagnostics                                                                                                                                                                                                           | Kinane, Denis F.                                                                                                                                                        | 2000 |
| Up-regulation of matrix metalloproteinase-8 by betel quid extract and arecoline and its role in 2D motility                                                                                                                       | Liu, Shyun-Yeu; Liu, Young-Chau; Huang, Wen-Tsung; Huang, Guan-Cheng; Chen, Tai-Chi; Lin, Mei-Huei                                                                      | 2007 |
| Aseptic loosening of total hip arthroplasty: preliminary genetic investigation                                                                                                                                                    | Godoy-Santos, Alexandre Leme; D'Elia, Caio O.; Teixeira, William J.; Cabrita, Henrique B.; Camanho, Gilberto L.                                                         | 2009 |
| Prevalence of Epstein-Barr virus DNA and Porphyromonas gingivalis in Japanese peri-implantitis patients                                                                                                                           | Kato, Ayako; Imai, Kenichi; Sato, Hiroki; Ogata, Yorimasa                                                                                                               | 2017 |
| Effects of cigarette smoke condensate and nicotine on human gingival fibroblast-mediated collagen degradation                                                                                                                     | Zhang, Weiping; Fang, Meixian; Song, Fengyu; Windsor, L. Jack                                                                                                           | 2011 |
| Glycemic control of type 2 diabetes and severe periodontal disease in the US adult population                                                                                                                                     | Tsai, Carlene; Hayes, Catherine; Taylor, George W.                                                                                                                      | 2002 |
| Growth factors and connective tissue homeostasis in periodontal disease                                                                                                                                                           | Pisoschi, Catalina; Stanciulescu, Camelia; Banita, Monica                                                                                                               | 2012 |
| Drugs in development: bisphosphonates and metalloproteinase inhibitors                                                                                                                                                            | Catterall, Jon B.; Cawston, Tim E.                                                                                                                                      | 2002 |
| Bacterial and salivary biomarkers predict the gingival inflammatory profile                                                                                                                                                       | Lee, Angie; Ghaname, Carrie B.; Braun, Thomas M.; Sugai, James V.; Teles, Ricardo P.; Loesche, Walter J.; Kornman, Kenneth S.; Giannobile, William V.; Kinney, Janet S. | 2012 |
| Neutrophils in periodontal inflammation                                                                                                                                                                                           | Scott, David A.; Krauss, Jennifer                                                                                                                                       | 2012 |
| Cytokine gene polymorphism and immunoregulation in periodontal disease                                                                                                                                                            | Taylor, John J.; Preshaw, Philip M.; Donaldson, Peter T.                                                                                                                | 2004 |
| Salivary markers for periodontal and general diseases                                                                                                                                                                             | Podzimek, Stepan; Vondrackova, Lucie; Duskova, Jana; Janatova, Tatjana; Broukal, Zdenek                                                                                 | 2016 |
| Relationship between fibrinolytic activity and gingival inflammatory reaction in young individuals                                                                                                                                | Olofsson, A.; Lindberg, P.; Lanke, Jan; Matsson, Lars; Kinnby, B.                                                                                                       | 2003 |
| MMP-13 and TIMP-1 determinations in progressive chronic periodontitis                                                                                                                                                             | Hernández, Marcela; Martínez, Benjamín; Tejerina, José María; Valenzuela, María Antonieta; Gamonal, Jorge                                                               | 2007 |
| Current concepts in osteolysis                                                                                                                                                                                                    | Ollivier, B.; Wilmhurst, J. A.; M. Clark, I.; Donnell, S. T.                                                                                                            | 2012 |
| Cytokines in patients with type 2 diabetes and chronic periodontitis: A systematic review and meta-analysis                                                                                                                       | Atieh, Momen A.; Faggion Jr, Clovis M.; Seymour, Gregory J.                                                                                                             | 2014 |
| Salivary interleukin-1 $\beta$ concentration and the presence of multiple pathogens in periodontitis                                                                                                                              | Gursoy, Ulvi Kahraman; Könönen, Eija; Uitto, Veil-Jukka; Pussinen, Pirkko J.; Hyvärinen, Kati; Suominen-Taipale, Liisa; Knuuttila, Matti                                | 2009 |
| The effect of chronic periodontitis on serum levels of matrix metalloproteinase-2 (MMP-2), tissue inhibitor of metalloproteinase-1 (TIMP-1), interleukin-12 (IL-12) and granulocyte-macrophage colony-stimulating factor (GM-CSF) | Liao, Peixi; Loo, W. T.; Li, Guangyue; Liang, Hao; Wang, Min; Cheung, M. N.; Luo, Ziyuan                                                                                | 2011 |
| Th1/Th2 cytokines balance—yin and yang of reproductive immunology                                                                                                                                                                 | Wilczyński, Jacek R.                                                                                                                                                    | 2005 |
| Infection, inflammation, and bone regeneration: a paradoxical relationship                                                                                                                                                        | Thomas, M. V.; Puleo, D. A.                                                                                                                                             | 2011 |
| New insights into and novel applications for platelet-rich fibrin therapies                                                                                                                                                       | Anitua, Eduardo; Sánchez, Mikel; Nurden, Alan T.; Nurden, Paquita; Orive, Gorka; Andía, Isabel                                                                          | 2006 |
| Matrix metalloproteinases (MMP-2 and 9) and tissue inhibitors of matrix metalloproteinases (TIMP-1 and 2) during the course of experimental necrotizing herpetic keratitis                                                        | Yang, Yan-Ning; Bauer, Dirk; Wasmuth, Susanne; Steuhl, Klaus-Peter; Heiligenhaus, Arnd                                                                                  | 2003 |

|                                                                                                                                                                                                   |                                                                                                                                                                                                                                                                    |      |
|---------------------------------------------------------------------------------------------------------------------------------------------------------------------------------------------------|--------------------------------------------------------------------------------------------------------------------------------------------------------------------------------------------------------------------------------------------------------------------|------|
| Identification of polymorphonuclear leukocyte collagenase and gelatinase activities in mouthrinse samples: correlation with periodontal disease activity in adult and juvenile periodontitis      | Gangbar, Stephen; Overall, Christopher M.; McCulloch, Christopher AG; Sodek, Jaro                                                                                                                                                                                  | 1990 |
| Capsular contracture by silicone breast implants: possible causes, biocompatibility, and prophylactic strategies                                                                                  | Steiart, Andreas E.; Boyce, Maria; Sorg, Heiko                                                                                                                                                                                                                     | 2013 |
| Personalized medicine: an update of salivary biomarkers for periodontal diseases                                                                                                                  | Korte, Dina L.; Kinney, Janet                                                                                                                                                                                                                                      | 2016 |
| Global risk factors and risk indicators for periodontal diseases                                                                                                                                  | Albandar, Jasim M.                                                                                                                                                                                                                                                 | 2002 |
| Rho guanine nucleotide exchange factors: regulators of Rho GTPase activity in development and disease                                                                                             | Cook, Danielle R.; Rossman, Kent L.; Der, Channing J.                                                                                                                                                                                                              | 2014 |
| Periodontal herpesviruses: prevalence, pathogenicity, systemic risk                                                                                                                               | Slots, Jørgen                                                                                                                                                                                                                                                      | 2015 |
| Bacterial invasion of epithelial cells and spreading in periodontal tissue                                                                                                                        | Tribble, Gena D.; Lamont, Richard J.                                                                                                                                                                                                                               | 2010 |
| Periodontal proteomics: wonders never cease!                                                                                                                                                      | Grover, Harpreet Singh; Kapoor, Shalini; Saksena, Neha                                                                                                                                                                                                             | 2013 |
| Extracellular matrix degradation and tissue remodeling in periprosthetic loosening and osteolysis: focus on matrix metalloproteinases, their endogenous tissue inhibitors, and the proteasome     | Syggelos, Spyros A.; Aletras, Alexios J.; Smirlaki, Ioanna; Skandalis, Spyros S.                                                                                                                                                                                   | 2013 |
| Polymorphonuclear neutrophils in periodontitis and their possible modulation as a therapeutic approach                                                                                            | Nicu, Elena A.; Loos, Bruno G.                                                                                                                                                                                                                                     | 2016 |
| Osteocalcin in serum, saliva and gingival crevicular fluid: their relation with periodontal treatment outcome in postmenopausal women                                                             | Bullon, Pedro; Chandler, Lucy; Segura Egea, Juan J.; Perez Cano, Ramón; Martínez Sahuquillo, Angel                                                                                                                                                                 | 2007 |
| Increasing popularity of waterpipe tobacco smoking and electronic cigarette use: Implications for oral healthcare                                                                                 | Ramôa, Carolina P.; Eissenberg, Thomas; Sahingur, Sinem Esra                                                                                                                                                                                                       | 2017 |
| Matrix metalloproteinase-2,-9, and-12 gene polymorphisms in generalized aggressive periodontitis                                                                                                  | Gürkan, Ali; Emingil, Gülnur; Saygan, Buket Han; Atilla, Gül; Çınarcık, Serhat; Köse, Timur; Berdeli, Afig                                                                                                                                                         | 2007 |
| Quantification of mast cells in different stages of human periodontal disease                                                                                                                     | Batista, A. C.; Rodini, C. O.; Lara, V. S.                                                                                                                                                                                                                         | 2005 |
| The investigation of glutathione peroxidase, lactoferrin, myeloperoxidase and interleukin-1 $\beta$ in gingival crevicular fluid: implications for oxidative stress in human periodontal diseases | Wei, Pi-Fen; Ho, Kun-Yen; Ho, Yea-Pyng; Wu, Yi-Min; Yang, Yi-Hsin; Tsai, Chi-Cheng                                                                                                                                                                                 | 2004 |
| Dental biofilms: difficult therapeutic targets                                                                                                                                                    | Socransky, Sigmund S.; Haffajee, Anne D.                                                                                                                                                                                                                           | 2002 |
| Prognostic utility of biomarkers in predicting of one-year outcomes in patients with aortic stenosis treated with transcatheter or surgical aortic valve implantation                             | Parenica, Jiri; Nemec, Petr; Tomandl, Josef; Ondrasek, Jiri; Pavkova-Goldbergova, Monika; Tretina, Martin; Jarkovsky, Jiri; Littnerova, Simona; Poloczek, Martin; Pokorny, Petr                                                                                    | 2012 |
| Current perspective of the impact of smoking on the progression and treatment of periodontitis                                                                                                    | Nociti Jr, Francisco H.; Casati, Marcio Z.; Duarte, Poliana Mendes                                                                                                                                                                                                 | 2015 |
| Pilot study on oral health status as assessed by an active matrix metalloproteinase-8 chairside mouthrinse test in adolescents                                                                    | Heikkinen, Anna Maria; Nwhator, Solomon O.; Rathnayake, Nilminie; Mäntylä, Päivi; Vatanen, Päivi; Sorsa, Timo                                                                                                                                                      | 2016 |
| Suppression of angiogenesis by lentiviral delivery of PEX, a noncatalytic fragment of matrix metalloproteinase 2                                                                                  | Pfeifer, Alexander; Kessler, Torsten; Silletti, Steve; Cheresh, David A.; Verma, Inder M.                                                                                                                                                                          | 2000 |
| Pro-oxidant status and matrix metalloproteinases in apical lesions and gingival crevicular fluid as potential biomarkers for asymptomatic apical periodontitis and endodontic treatment response  | Dezerega, Andrea; Madrid, Sonia; Mundi, Verónica; Valenzuela, María A.; Garrido, Mauricio; Paredes, Rodolfo; García-Sesnich, Jocelyn; Ortega, Ana V.; Gamonal, Jorge; Hernández, Marcela                                                                           | 2012 |
| Particle disease: a comprehensive theory of periprosthetic osteolysis: a review                                                                                                                   | Gallo, Jifí; Kamínek, Petr; Tichá, Vlastislava; Rihakova, P.; Ditmar, Rudolf                                                                                                                                                                                       | 2002 |
| Recurrent pregnancy loss: a disease of inflammation and coagulation                                                                                                                               | Kwak-Kim, Joanne; Yang, Kwang Moon; Gilman-Sachs, Alice                                                                                                                                                                                                            | 2009 |
| Breast augmentation: part II—adverse capsular contracture                                                                                                                                         | Berry, M. G.; Cucchiara, V.; Davies, D. M.                                                                                                                                                                                                                         | 2010 |
| Initial comparison of proteomic profiles of whole unstimulated saliva obtained from generalized aggressive periodontitis patients and healthy control subjects                                    | Wu, Y.; Shu, R.; Luo, L.-J.; Ge, L.-H.; Xie, Y.-F.                                                                                                                                                                                                                 | 2009 |
| The expression and function of cystatin C and cathepsin B and cathepsin L during mouse embryo implantation and placentation                                                                       | Afonso, Suzanne; Romagnano, Linda; Babiarz, Bruce                                                                                                                                                                                                                  | 1997 |
| Matrix metalloproteinases 2 and 9 and e-cadherin expression in the endometrium during the implantation window of infertile women before in vitro fertilization treatment                          | Maia-Filho, Vamberto OA; Rocha, Andre M.; Ferreira, Fernando P.; Bonetti, Tatiana CS; Serafini, Paulo; Motta, Eduardo LA                                                                                                                                           | 2015 |
| Advanced glycation end products upregulate the endoplasmic reticulum stress in human periodontal ligament cells                                                                                   | Xu, Jie; Xiong, Ming; Huang, Bin; Chen, Huangqin                                                                                                                                                                                                                   | 2015 |
| Chronic periodontitis and RANKL/OPG ratio in peri-implant mucosae inflammation                                                                                                                    | Costa, Lucas Carneiro; Fonseca, Marcos Alexandre da; Pinheiro, Aristides da Rosa; Aguiar, Telma Regina da Silva; Machado, Aldir Nascimento; Quinelato, Valquiria; Bonato, Leticia Ladeira; Aguiar, Diego Pinheiro; Vieira, Thays; Almeida, Fernando Luiz Duarte de | 2018 |
| H-classic: a new method to identify classic articles in Implant Dentistry, Periodontics, and Oral Surgery                                                                                         | De la Flor-Martínez, Maria; Galindo-Moreno, Pablo; Sánchez-Fernández, Elena; Piattelli, Adriano; Cobo, Manuel Jesus; Herrera-Viedma, Enrique                                                                                                                       | 2016 |
| Expression of an extracellular matrix metalloproteinase inducer (basigin) in the human ovary and ovarian endometriosis                                                                            | Smedts, Anna M.; Lele, Subodh M.; Modesitt, Susan C.; Curry, Thomas E.                                                                                                                                                                                             | 2006 |
| Proinflammatory mediator expression in a novel murine model of titanium-particle-induced intramedullary inflammation                                                                              | Warne, Bryan A.; Epstein, Noah J.; Trindade, Michael CD; Miyashishi, Keita; Ma, Ting; Saket, Ramin R.; Regula, Donald; Goodman, Stuart B.; Smith, R. Lane                                                                                                          | 2004 |
| Immunomodulatory effects of chemokines during the early implantation window                                                                                                                       | Fraccaroli, Laura; Alfieri, Julio; Leiros, Claudia Perez; Ramhorst, Rosanna                                                                                                                                                                                        | 2009 |

|                                                                                                                                                                       |                                                                                                                                                                              |      |
|-----------------------------------------------------------------------------------------------------------------------------------------------------------------------|------------------------------------------------------------------------------------------------------------------------------------------------------------------------------|------|
| Expression profiling reveals alternative macrophage activation and impaired osteogenesis in periprosthetic osteolysis                                                 | Koulouvaris, Panagiotis; Ly, Khanh; Ivashkiv, Lionel B.; Bostrom, Mathias P.; Nestor, Bryan J.; Sculco, Thomas P.; Purdue, P. Edward                                         | 2008 |
| Endometriosis: a disease of oxidative stress?                                                                                                                         | Murphy, Ana A.; Santanam, Nalini; Parthasarathy, Sampath                                                                                                                     | 1998 |
| Periodontal microbiology in Latin America                                                                                                                             | Contreras, Adolfo; Moreno, Sandra M.; Jaramillo, Adriana; Pelaez, Melissa; Duque, Andres; Botero, Javier E.; Slots, Jørgen                                                   | 2015 |
| The role of growth factors and cytokines during implantation: endocrine and paracrine interactions                                                                    | Guzeloglu-Kayisli, Ozlem; Kayisli, Umit Ali; Taylor, Hugh S.                                                                                                                 | 2009 |
| Inhibition of macrophage migration inhibitory factor reduces endometriotic implant size in mice with experimentally induced disease                                   | Nothnick, Warren B.; Colvin, Arlene; Cheng, Kai Fan; Al-Abed, Yousef                                                                                                         | 2011 |
| Picrosirius red staining: a useful tool to appraise collagen networks in normal and pathological tissues                                                              | Lattouf, Raed; Younes, Ronald; Lutowski, Didier; Naaman, Nada; Godeau, Gaston; Senni, Karim; Changotade, Sylvie                                                              | 2014 |
| Non-conventional therapeutics for oral infections                                                                                                                     | Allaker, Robert P.; Ian Douglas, C. W.                                                                                                                                       | 2015 |
| Doxycycline causes regression of endometriotic implants: a rat model                                                                                                  | Akkaya, Pinar; Onalan, Gogsen; Haberal, Nihan; Bayraktar, Nilufer; Mülâyim, Barış; Zeyneloglu, Hulusi B.                                                                     | 2009 |
| Longitudinal evaluation of GCF MMP-3 and TIMP-1 levels as prognostic factors for progression of periodontitis                                                         | Alpagot, T.; Bell, C.; Lundergan, W.; Chambers, D. W.; Rudin, R.                                                                                                             | 2001 |
| Salivary interleukin-6, matrix metalloproteinase-8, and osteoprotegerin in patients with periodontitis and diabetes                                                   | Costa, Priscila P.; Trevisan, Glaucio L.; Macedo, Guilherme O.; Palioto, Daniela B.; Souza, Sergio LS; Grisi, Marcio FM; Novaes Jr, Arthur B.; Taba Jr, Mario                | 2010 |
| Periodontitis: a host-mediated disruption of microbial homeostasis. Unlearning learned concepts                                                                       | Bartold, P. Mark; Van Dyke, Thomas E.                                                                                                                                        | 2013 |
| Polymerase chain reaction: A molecular diagnostic tool in periodontology                                                                                              | Maheaswari, Rajendran; Kshirsagar, Jaishree Tukaram; Lavanya, Nallasivam                                                                                                     | 2016 |
| RANK, RANKL and OPG in inflammatory arthritis and periprosthetic osteolysis                                                                                           | Ritchlin, C. T.; Schwarz, E. M.; O Keefe, R. J.; Looney, R. J.                                                                                                               | 2004 |
| Healing of extraction sockets in collagenase-2 (matrix metalloproteinase-8)-deficient mice                                                                            | Korpi, Jarkko T.; Aaström, Pirjo; Lehtonen, Niko; Tjäderhane, Leo; Kallio-Pulkkinen, Soili; Siponen, Maria; Sorsa, Timo; Pirilä, Emma; Salo, Tuula                           | 2009 |
| Effects of Antimicrobial Photodynamic Therapy on Transforming Growth Factor-β 1 Levels in the Gingival Crevicular Fluid                                               | Souza, Sérgio LS; Andrade, Patricia F.; Silva, Joao S.; Tristao, Fabrine SM; Rocha, Fernanda A.; Palioto, Daniela B.; Grisi, Marcio FM; Taba Jr, Mario; Novaes Jr, Arthur B. | 2013 |
| Current concepts of epigenetics and its role in periodontitis                                                                                                         | Larsson, Lena                                                                                                                                                                | 2017 |
| Effect of mechanical debridement with adjunct antimicrobial photodynamic therapy in the treatment of peri-implant diseases in type-2 diabetic smokers and non-smokers | Abduljabbar, Tariq                                                                                                                                                           | 2017 |
| Expression of extracellular matrix metalloproteinases inducer on micrometastatic and primary mammary carcinoma cells                                                  | Reimers, Natalie; Zafrakas, Kristine; Assmann, Volker; Egen, Cornelia; Riethdorf, Lutz; Riethdorf, Sabine; Berger, Jürgen; Ebel, Sebastian; Jänicke, Fritz; Sauter, Guido    | 2004 |
| Bone-Implant Interface Biology                                                                                                                                        | Takagi, Michiaki                                                                                                                                                             | 2001 |
| Interleukin-17: a new bone acting cytokine in vitro                                                                                                                   | Van Bezooijen, Rutger L.; Farih-Sips, Hetty CM; Papapoulos, Socrates E.; Löwik, Clemens WGM                                                                                  | 1999 |
| The role of gingipains in the pathogenesis of periodontal disease                                                                                                     | Imamura, Takahisa                                                                                                                                                            | 2003 |
| Wound healing around endosseous implants in experimental diabetes.                                                                                                    | Nevins, Marc L.; Karimbux, Nadeem Y.; Weber, Hans Peter; Giannobile, William V.; Fiorellini, Joseph P.                                                                       | 1998 |
| Differential expression of growth-, angiogenesis-and invasion-related factors in the development of placenta accreta                                                  | Tseng, Jenn-Jhy; Chou, Min-Min                                                                                                                                               | 2006 |
| Migration of titanium dioxide microparticles and nanoparticles through the body and deposition in the gingiva: an experimental study in rats                          | Guglielmotti, Maria B.; Domingo, Mariela G.; Steimetz, Tammy; Ramos, Emilio; Paparella, Maria L.; Olmedo, Daniel G.                                                          | 2015 |
| Leukemia inhibitory factor and interleukin-11: critical regulators in the establishment of pregnancy                                                                  | Paiva, Premila; Menckhorst, Ellen; Salamonsen, Lois; Dimitriadis, Evdokia                                                                                                    | 2009 |
| Role of progesterone in nonhuman primate implantation                                                                                                                 | Slayden, Ov Daniel; Keator, Christopher S.                                                                                                                                   | 2007 |
| Current research in the pathogenesis of aseptic implant loosening associated with particulate wear debris                                                             | Jiang, Yunpeng; Jia, Tanghong; Wooley, Paul H.; Yang, Shang-You                                                                                                              | 2013 |
| Advanced biomaterials and their potential applications in the treatment of periodontal disease                                                                        | Chen, Xi; Wu, Guofeng; Feng, Zhihong; Dong, Yan; Zhou, Wei; Li, Bei; Bai, Shizhu; Zhao, Yimin                                                                                | 2016 |
| The effect of low-level laser therapy as an adjunct to non-surgical periodontal treatment                                                                             | Aykol, Gokce; Baser, Ulku; Maden, Ilay; Kazak, Zafer; Onan, Utku; Tanrikulu-Kucuk, Sevda; Ademoglu, Evin; Issever, Halim; Yalcin, Funda                                      | 2011 |
| Immunochemical detection of the proteoglycans decorin and biglycan in human gingival crevicular fluid from sites of advanced periodontitis                            | Waddington, R. J.; Embery, G.; Smith, A. J.                                                                                                                                  | 1998 |
| The short-term effects of low-level lasers as adjunct therapy in the treatment of periodontal inflammation                                                            | Qadri, T.; Miranda, L.; Tuner, J.; Gustafsson, A.                                                                                                                            | 2005 |
| Hormonal regulation of implantation                                                                                                                                   | Kodaman, Pinar H.; Taylor, Hugh S.                                                                                                                                           | 2004 |
| Gene polymorphisms of matrix metalloproteinase-2,-9 and-12 in periodontal health and severe chronic periodontitis                                                     | Gürkan, Ali; Emingil, Gülnur; Saygan, Buket Han; Atilla, Gül; Çınarcık, Serhat; Köse, Timur; Berdeli, Afif                                                                   | 2008 |
| Bone implant application                                                                                                                                              | Faltdt, Jenny                                                                                                                                                                | 2011 |
| New directions in strategies using cell therapy for heart disease                                                                                                     | Itescu, Silviu; Schuster, Michael D.; Kocher, Alfred A.                                                                                                                      | 2003 |
| Trends in laboratory diagnostic methods in periodontology                                                                                                             | Bolerázska, Beáta; Mareková, Mária; Markovská, Neda                                                                                                                          | 2016 |

|                                                                                                                                                                                        |                                                                                                                                                                                                      |      |
|----------------------------------------------------------------------------------------------------------------------------------------------------------------------------------------|------------------------------------------------------------------------------------------------------------------------------------------------------------------------------------------------------|------|
| Molecular genetics of implantation in the mouse                                                                                                                                        | Rinkenberger, Julie L.; Cross, James C.; Werb, Zena                                                                                                                                                  | 1997 |
| Paracrine regulators of implantation                                                                                                                                                   | Simon, Carlos; Martin, Julio Cesar; Pellicer, Antonio                                                                                                                                                | 2000 |
| Interface membrane fibroblasts around aseptically loosened endoprostheses express MMP-13                                                                                               | Wagner, Susanne; Gollwitzer, Hans; Wernicke, Dirk; Langer, Rupert; Siebenrock, Klaus A.; Hofstetter, Willy                                                                                           | 2008 |
| Test kit for detecting periodontal disease                                                                                                                                             | Bengtsson, Thomas; Wikström, Maude                                                                                                                                                                   | 2009 |
| Human mast cells stimulate fibroblast proliferation, collagen synthesis and lattice contraction: a direct role for mast cells in skin fibrosis                                         | Garbuzenko, El; Nagler, A.; Pickholtz, D.; Gillery, P.; Reich, R.; Maquart, F.-X.; Levi-Schaffer, F.                                                                                                 | 2002 |
| LOX-1 is involved in IL-1 $\beta$ production and extracellular matrix breakdown in dental peri-implantitis                                                                             | Che, Chengye; Liu, Jie; Ma, Lei; Xu, Huirong; Bai, Na; Zhang, Qian                                                                                                                                   | 2017 |
| Methods and test kits for specific and sensitive diagnosing of periodontal diseases                                                                                                    | Sorsa, Timo Arto; Tikanoja, Sari Hannele; Lundqvist, Leila Christina                                                                                                                                 | 1998 |
| Collagen degradation by interleukin-1 $\beta$ -stimulated gingival fibroblasts is accompanied by release and activation of multiple matrix metalloproteinases and cysteine proteinases | Cox, S. W.; Eley, B. M.; Kiili, Markus; Asikainen, Antti; Tervahartiala, T.; Sorsa, Timo                                                                                                             | 2006 |
| Analysis of the uterine epithelial and conceptus transcriptome and luminal fluid proteome during the peri-implantation period of pregnancy in sheep                                    | Brooks, Kelsey; Burns, Gregory W.; Moraes, Joao GN; Spencer, Thomas E.                                                                                                                               | 2016 |
| Serum levels of interleukin-10 and tumour necrosis factor- $\alpha$ in chronic periodontitis                                                                                           | Passoja, Anna; Puijola, Ilkka; Knuuttila, Matti; Niemelä, Onni; Karttunen, Riitta; Raunio, Taina; Tervonen, Tellervo                                                                                 | 2010 |
| Effects of alendronate on human osteoblast-like MG63 cells and matrix metalloproteinases                                                                                               | Sun, Jun; Song, Fengyu; Zhang, Weiping; Sexton, Brent E.; Windsor, L. Jack                                                                                                                           | 2012 |
| Capsular contracture after breast augmentation: an update for clinical practice                                                                                                        | Headon, Hannah; Kasem, Adbul; Mokbel, Kefah                                                                                                                                                          | 2015 |
| Regulation of trophoblast invasion by IL-1 $\beta$ and TGF- $\beta$ 1                                                                                                                  | Karmakar, Subhradip; Das, Chandana                                                                                                                                                                   | 2002 |
| Progress in matrix metalloproteinase research                                                                                                                                          | Murphy, Gillian; Nagase, Hideaki                                                                                                                                                                     | 2008 |
| Role of nitric oxide in implantation and menstruation                                                                                                                                  | Chwalisz, Kristof; Garfield, Robert E.                                                                                                                                                               | 2000 |
| Growth mechanisms of endometriotic cells in implanted places: a review                                                                                                                 | Jiang, Qiao-Ying; Wu, Rui-Jin                                                                                                                                                                        | 2012 |
| Aggressive periodontitis: The unsolved mystery.                                                                                                                                        | Clark, Danielle; Febbraio, Maria; Levin, Liran                                                                                                                                                       | 2017 |
| Tissue inhibitor of metalloproteinases (TIMPs) in heart failure                                                                                                                        | Moore, Linn; Fan, Dong; Basu, Ratnadeep; Kandam, Vijay; Kassiri, Zamanah                                                                                                                             | 2012 |
| A review of biomarkers in peri-miniscrew implant crevicular fluid (PMICF)                                                                                                              | Kaur, Avinash; Kharbada, Om P.; Kapoor, Priyanka; Kalyanasundaram, Dinesh                                                                                                                            | 2017 |
| Association of gingival crevicular fluid biomarkers during periodontal maintenance with subsequent progressive periodontitis                                                           | Reinhardt, Richard A.; Stoner, Julie A.; Golub, Lorne M.; Lee, Hsi-Ming; Nummikoski, Pirkka V.; Sorsa, Timo; Payne, Jeffrey B.                                                                       | 2010 |
| Macrophage inflammatory protein-1 Alpha (MIP-1 alpha)/CCL3: as a biomarker                                                                                                             | Bhavsar, Ishita; Miller, Craig S.; Al-Sabbagh, Mohanad                                                                                                                                               | 2014 |
| To cross-link or not to cross-link? Cross-linking associated foreign body response of collagen-based devices                                                                           | Delgado, Luis M.; Bayon, Yves; Pandit, Abhay; Zeugolis, Dimitrios I.                                                                                                                                 | 2015 |
| Potential of endogenous regenerative technology for in situ regenerative medicine                                                                                                      | Anitua, Eduardo; Sánchez, Mikel; Orive, Gorka                                                                                                                                                        | 2010 |
| Embryo implantation and tumor metastasis: common pathways of invasion and angiogenesis                                                                                                 | Murray, Michael J.; Lessey, Bruce A.                                                                                                                                                                 | 1999 |
| Regulation of aromatase expression in estrogen-responsive breast and uterine disease: from bench to treatment                                                                          | Bulun, Serdar E.; Lin, Zhihong; Imir, Gonca; Amin, Sanobar; Demura, Masashi; Yilmaz, Bertan; Martin, Regina; Utsunomiya, Hiroki; Thung, Steven; Gurates, Bilgin                                      | 2005 |
| Mechanisms of placental invasion of the uterus and their control                                                                                                                       | Graham, Charles H.; Lala, Peeyush K.                                                                                                                                                                 | 1992 |
| MMP-2, MMP-9 and TIMP-2 gene polymorphisms in Chinese patients with generalized aggressive periodontitis                                                                               | Chen, Dong; Wang, Qi; Ma, Zhi-Wei; Chen, Fa-Ming; Chen, Yue; Xie, Guang-Yuan; Wang, Qin-Tao; Wu, Zhi-Fen                                                                                             | 2007 |
| The pleiotropic effects of the hydroxy-methyl-glutaryl-CoA reductase inhibitors in cardiovascular disease: a comprehensive review                                                      | Mihos, Christos G.; Salas, Maria J.; Santana, Orlando                                                                                                                                                | 2010 |
| Vascular endothelial growth factor in the sera and effusions of patients with malignant and nonmalignant disease                                                                       | Kraft, Andrea; Weindel, Karin; Ochs, Andreas; Marth, Christian; Zmija, Jörg; Schumacher, Petra; Unger, Clemens; Marmé, Dieter; Gastl, Günther                                                        | 1999 |
| Adjunct effect of the antimicrobial photodynamic therapy to an association of non-surgical and surgical periodontal treatment in modulation of gene expression: a human study          | Andrade, Patricia F.; Garlet, Gustavo P.; Silva, João S.; Fernandes, Patricia G.; Milanezi, Cristiane; Novaes Jr, Arthur B.; Palioto, Daniela B.; Grisi, Marcio FM; Taba Jr, Mário; Souza, Sérgio LS | 2013 |
| Buried alive: how osteoblasts become osteocytes                                                                                                                                        | Franz-Odenaal, Tamara A.; Hall, Brian K.; Witten, P. Eckhard                                                                                                                                         | 2006 |
| Endometriosis                                                                                                                                                                          | Giudice, Linda C.                                                                                                                                                                                    | 2010 |
| Analysis of P. gingivalis, T. forsythia and S. aureus levels in edentulous mouths prior to and 6 months after placement of one-piece zirconia and titanium implants                    | Siddiqi, Allauddin; Milne, Trudy; Cullinan, Mary P.; Seymour, Gregory J.                                                                                                                             | 2016 |
| Gene expression profiles of bovine caruncular and intercaruncular endometrium at implantation                                                                                          | Mansouri-Attia, Nadéra; Aubert, Julie; Reinaud, Pierrette; Giraud-Delville, Corinne; Taghouti, Géraldine; Galio, Laurent; Everts, Robin E.; Degrelle, Séverine; Richard, Christophe; Hue, Isabelle   | 2009 |
| Do uterine natural killer cell numbers in peri-implantation endometrium predict hypertensive disorder in pregnancy in women with a history of reproductive failure?                    | Wong, Alice Wai Yee; Archer, Bethan; Mariee, Najat; Li, Tin Chiu; Laird, Susan M.                                                                                                                    | 2014 |

|                                                                                                                                                                  |                                                                                                                                                                                      |      |
|------------------------------------------------------------------------------------------------------------------------------------------------------------------|--------------------------------------------------------------------------------------------------------------------------------------------------------------------------------------|------|
| Comparisons between two biochemical markers in evaluating periodontal disease severity: a cross-sectional study                                                  | Khongkhunthian, Sakornrat; Kongtawelert, Prachya; Ongchai, Siriwan; Pothacharoen, Peraphan; Sastraruji, Thanapat; Jotikasthira, Dhirawat; Krisanaprakornkit, Suttichai               | 2014 |
| Diabetes may affect the expression of matrix metalloproteinases and their inhibitors more than smoking in chronic periodontitis                                  | Bastos, M. F.; Tucci, M. A.; De Siqueira, A.; De Faveri, M.; Figueiredo, L. C.; Vallim, P. C.; Duarte, P. M.                                                                         | 2017 |
| The pathobiology and pathology of aseptic implant failure                                                                                                        | Athanasou, N. A.                                                                                                                                                                     | 2016 |
| EMMPRIN, an upstream regulator of MMPs, in CNS biology                                                                                                           | Kaushik, Deepak Kumar; Hahn, Jennifer Nancy; Yong, V. Wee                                                                                                                            | 2015 |
| Altered matrix metalloproteinases and tissue inhibitors of metalloproteinases in embryos from diabetic rats during early organogenesis                           | Higa, Romina; Kurtz, Melisa; Capobianco, Evangelina; Martínez, Nora; White, Verónica; Jawerbaum, Alicia                                                                              | 2011 |
| Clinical and radiographic evaluation of immediate loaded dental implants with local application of melatonin: a preliminary randomized controlled clinical trial | El-Gammal, Mona Y.; Salem, Ahmed S.; Anees, Mohamed M.; Tawfik, Mohamed A.                                                                                                           | 2016 |
| Apoptosis at the time of embryo implantation in mouse and rat                                                                                                    | Pampfer, Serge; Donnay, Isabelle                                                                                                                                                     | 1999 |
| The effect of Parodontax® on the MMP-8 concentration in gingivitis patients                                                                                      | Ehlers, Vicky; Helm, Sebastian; Kasaj, Adrian; Willershausen, Brita                                                                                                                  | 2011 |
| Hyaluronic acid: a boon in periodontal therapy                                                                                                                   | Dahiya, Parveen; Kamal, Reet                                                                                                                                                         | 2013 |
| Prokineticin 1 mediates fetal-maternal dialogue regulating endometrial leukemia inhibitory factor                                                                | Evans, Jemma; Catalano, Rob D.; Brown, Pamela; Sherwin, Rob; Critchley, Hilary OD; Fazleabas, Asgerally T.; Jabbour, Henry N.                                                        | 2009 |
| Molecular mechanisms of blood vessel growth                                                                                                                      | Conway, Edward M.; Collen, Desire; Carmeliet, Peter                                                                                                                                  | 2001 |
| Evidence that osteocyte perilacunar remodelling contributes to polyethylene wear particle induced osteolysis                                                     | Ormsby, Renee T.; Cantley, Melissa; Kogawa, Masakazu; Solomon, L. Bogdan; Haynes, David R.; Findlay, David M.; Atkins, Gerald J.                                                     | 2016 |
| Current concepts in periodontal bioengineering                                                                                                                   | Taba Jr, M.; Jin, Q.; Sugai, J. V.; Giannobile, W. V.                                                                                                                                | 2005 |
| Roles of the multifunctional glycoprotein, emmprin (basigin; CD147), in tumour progression                                                                       | Yan, Li; Zucker, Stanley; Toole, Bryan P.                                                                                                                                            | 2005 |
| Endometrial anomalies in women with endometriosis                                                                                                                | SHARPE-TIMMS, KATHY L.                                                                                                                                                               | 2001 |
| Using rats as a research model for the study of endometriosis                                                                                                    | SHARPE-TIMMS, KATHY L.                                                                                                                                                               | 2002 |
| Pharmacologic modulation of clodronate in local therapy of periodontal and implant inflammation                                                                  | Volpi, R.; Rossi, F.; Trisi, P.; Testori, T.; Berardi, D.; Perfetti, G.                                                                                                              | 2007 |
| Particle-induced osteolysis is not accompanied by systemic remodeling but is reflected by systemic bone biomarkers                                               | Ross, R. D.; Virdi, A. S.; Liu, S.; Sena, K.; Sumner, D. R.                                                                                                                          | 2014 |
| Current treatment options in (peri) myocarditis and inflammatory cardiomyopathy                                                                                  | Maisch, B.; Pankuweit, S.                                                                                                                                                            | 2012 |
| MMP-13 expression in coronal and radicular dentin according to caries progression-a pilot study                                                                  | Lee, Tae Yeon; Jin, Eun Jung; Choi, Bohm                                                                                                                                             | 2013 |
| Transforming growth factor beta and the endometrium                                                                                                              | Godkin, James D.; Dore, J. J.                                                                                                                                                        | 1998 |
| Randomized, double-blind, placebo-controlled clinical trial on the efficacy of 0.5% indomethacin eye drops in uveitic macular edema                              | Allegri, Pia; Murialdo, Ugo; Peri, Simona; Carniglia, Rosanna; Crivelli, Maria Grazia; Compiano, Silvia; Autuori, Silvia; Mastromarino, Antonio; Zurria, Monia; Marrazzo, Giuseppina | 2014 |
| Peri-implantitis                                                                                                                                                 | Hans, Veenu Madaan; Hans, Mayank; Hedge, Shashikant                                                                                                                                  | 2017 |
| Macrophages—key cells in the response to wear debris from joint replacements                                                                                     | Nich, Christophe; Takakubo, Yuya; Pajarinen, Jukka; Ainola, Mari; Salem, Abdelhakim; Sillat, Tarvo; Rao, Allison J.; Raska, Milan; Tamaki, Yasunobu; Takagi, Michiaki                | 2013 |
| Up-regulated expression of MIF by interfacial membrane fibroblasts and macrophages around aseptically loosened implants                                          | Pan, Xiaoyun; Mao, Xin; Cheng, Tao; Peng, Xiaochun; Zhang, Xianlong; Liu, Zhongtang; Wang, Qi; Chen, Yunsu                                                                           | 2012 |
| Vitamin D in endometriosis: a causative or confounding factor?                                                                                                   | Sayegh, Lamia; Fuleihan, Ghada El-Hajj; Nassar, Anwar H.                                                                                                                             | 2014 |
| Protein expression of MMP-13, uPA, and PAI-1 in pseudocapsular and interface tissue around implants of loose artificial hip joints and in osteoarthritis         | Diehl, Peter; Hantke, Bernd; Hennig, Michael; Tschesche, Harald; Mittelmeier, Wolfram; Schmitt, Manfred; Muehlenweg, Bernd                                                           | 2004 |
| Effect of Botulinum toxin type A on TGF-β/Smad pathway signaling: implications for silicone-induced capsule formation                                            | Kim, Sena; Ahn, Moonsang; Piao, Yibo; Ha, Yooseok; Choi, Dae-Kyoung; Yi, Min-Hee; Shin, Nara; Kim, Dong Woon; Oh, Sang-Ha                                                            | 2016 |
| The landscape of protein biomarkers proposed for periodontal disease: markers with functional meaning                                                            | Rosa, Nuno; Correia, Maria José; Arrais, Joel P.; Costa, Nuno; Oliveira, José Luís; Barros, Marlene                                                                                  | 2014 |
| Particulate wear debris activates protein tyrosine kinases and nuclear factor κB, which down-regulates type I collagen synthesis in human osteoblasts            | Vermes, Csaba; Roebuck, Kenneth A.; Chandrasekaran, Raman; Dobai, József G.; Jacobs, Joshua J.; Glant, Tibor T.                                                                      | 2000 |
| Modifiable risk factors in periodontitis: at the intersection of aging and disease                                                                               | Reynolds, Mark A.                                                                                                                                                                    | 2014 |
| Pathogenesis of bone loss after total hip arthroplasty                                                                                                           | Rubash, Harry E.; Sinha, Raj K.; Shanbhag, Arun S.; Kim, Shin-Yoon                                                                                                                   | 1998 |
| Radiation-induced microenvironments—The molecular basis for free flap complications in the pre-irradiated field?                                                 | Mueller, Cornelia Katharina; Schultze-Mosgau, Stefan                                                                                                                                 | 2009 |
| Matrix metalloproteinases 1, 2, 3 and 9 functional single-nucleotide polymorphisms in idiopathic recurrent spontaneous abortion                                  | Pereira, Nina; Ostojić, Saša; Volk, Marija; Kapović, Miljenko; Peterlin, Borut                                                                                                       | 2012 |
| Efficiency of Nanotube Surface-Treated Dental Implants Loaded with Doxycycline on Growth Reduction of Porphyromonas gingivalis.                                  | Ferreira, Cimara Fortes; Babu, Jegdish; Hamlekhan, Azhang; Patel, Sweetu; Shokuhfar, Tolou                                                                                           | 2017 |

|                                                                                                                                                                             |                                                                                                                                                                                 |      |
|-----------------------------------------------------------------------------------------------------------------------------------------------------------------------------|---------------------------------------------------------------------------------------------------------------------------------------------------------------------------------|------|
| Bisphosphonates and Implants                                                                                                                                                | Goyal, Eva; Sharma, Vivek; Bhatia, Vineet; Gill, Jaspreet Singh; Gupta, Gagandeep                                                                                               | 2017 |
| The expanding family of interleukin-1 cytokines and their role in destructive inflammatory disorders                                                                        | Barksby, H. E.; Lea, S. R.; Preshaw, P. M.; Taylor, J. J.                                                                                                                       | 2007 |
| Awareness of periodontal disease—the role of industry                                                                                                                       | Ishikawa, Isao; Arakawa, Shinichi                                                                                                                                               | 1998 |
| Differential expression and regulation of Ido2 in the mouse uterus during peri-implantation period                                                                          | Li, Dang-Dang; Liu, Xin-Yuan; Guo, Chuan-Hui; Yue, Liang; Yang, Zhan-Qing; Cao, Hang; Guo, Bin; Yue, Zhan-Peng                                                                  | 2015 |
| Intermittent parathyroid hormone enhances cancellous osseointegration of a novel murine tibial implant                                                                      | Yang, Xu; Ricciardi, Benjamin F.; Dvorzhinskiy, Aleksey; Brial, Caroline; Lane, Zachary; Bhimani, Samrath; Burket, Jayme C.; Hu, Bin; Sarkisian, Alexander M.; Ross, F. Patrick | 2015 |
| Periodontal ligament cell populations: the central role of fibroblasts in creating a unique tissue                                                                          | Lekic, Predrag; McCulloch, C. A. G.                                                                                                                                             | 1996 |
| The Current Knowledge of Genetic Susceptibility Influencing Dental Implant Outcomes                                                                                         | Alvim-Pereira, Fabiano; Alvim-Pereira, Claudia Cristina; Trevilatto, Paula Cristina                                                                                             | 2011 |
| Generation of human vascular smooth muscle subtypes provides insight into embryological origin—dependent disease susceptibility                                             | Cheung, Christine; Bernardo, Andreia S.; Trotter, Matthew WB; Pedersen, Roger A.; Sinha, Sanjay                                                                                 | 2012 |
| The enduring importance of animal models in understanding periodontal disease                                                                                               | Hajishengallis, George; Lamont, Richard J.; Graves, Dana T.                                                                                                                     | 2015 |
| Tissue engineering in dentistry                                                                                                                                             | Neel, Ensanya Ali Abou; Chrzanowski, Wojciech; Salih, Vehid M.; Kim, Hae-Won; Knowles, Jonathan C.                                                                              | 2014 |
| Platelet gels and releasates                                                                                                                                                | Borzini, Piero; Mazzucco, Laura                                                                                                                                                 | 2005 |
| Mechanisms of implantation                                                                                                                                                  | Makrigiannakis, Antonis; Minas, Vassilis                                                                                                                                        | 2007 |
| LDL receptor-related protein internalizes and degrades uPA-PAI-1 complexes and is essential for embryo implantation                                                         | Herz, Joachim; Clouthier, David E.; Hammer, Robert E.                                                                                                                           | 1992 |
| Platelet-rich plasma: preparation and formulation                                                                                                                           | Anitua, Eduardo; Prado, Roberto; Sánchez, Mikel; Orive, Gorka                                                                                                                   | 2012 |
| Changes in gingival crevicular fluid inflammatory mediator levels during the induction and resolution of experimental gingivitis in humans                                  | Offenbacher, Steven; Barros, Silvana; Mendoza, L.; Mauriello, S.; Preisser, J.; Moss, K.; De Jager, Marko; Aspiras, Marcelo                                                     | 2010 |
| The cytokine network during embryo implantation                                                                                                                             | Huang, H.                                                                                                                                                                       | 2006 |
| Matrix metalloproteinases involvement in pathologic conditions                                                                                                              | Amălinei, CORNELIA; Căruntu, IRINA-DRAGA; Giușcă, SIMONA ELIZA; Bălan, RALUCA ANCA                                                                                              | 2010 |
| Control and expression of cystatin C by mouse decidual cultures                                                                                                             | Afonso, Suzanne; Tovar, Chris; Romagnano, Linda; Babiarz, Bruce                                                                                                                 | 2002 |
| Comparative biology of the IGF system in endometrium, decidua, and placenta, and clinical implications for foetal growth and implantation disorders                         | Nayak, N. R.; Giudice, L. C.                                                                                                                                                    | 2003 |
| Bone resorption                                                                                                                                                             | Haynes, David R.; Findlay, David M.                                                                                                                                             | 2006 |
| Reduced expression of IL-6 and IL-1 $\alpha$ mRNAs in secretory phase endometrium of women with recurrent miscarriage                                                       | Jasper, Melinda J.; Tremellen, Kelton P.; Robertson, Sarah A.                                                                                                                   | 2007 |
| Molecular factors associated with compartmentalization of gingival immune responses and transepithelial neutrophil migration                                                | Tonetti, M. S.                                                                                                                                                                  | 1997 |
| Gingival crevicular fluid as a source of biomarkers for periodontitis                                                                                                       | Barros, Silvana P.; Williams, Ray; Offenbacher, Steven; Morelli, Thiago                                                                                                         | 2016 |
| Trophoblast invasion: the role of intracellular cytokine signalling via signal transducer and activator of transcription 3 (STAT3)                                          | Fitzgerald, Justine S.; Poehlmann, Tobias G.; Schleussner, Ekkehard; Markert, Udo R.                                                                                            | 2008 |
| Salivary cytokines as biomarkers of periodontal diseases                                                                                                                    | Jaedicke, Katrin M.; Preshaw, Philip M.; Taylor, John J.                                                                                                                        | 2016 |
| Plasminogen activators and plasminogen activator inhibitors in endometriosis                                                                                                | Gilbert-Estelles, Juan; Castello, Remedios; Gilbert, Juan; Ramon, Luis Andres; Espana, Francisco; Romeu, Alberto; Estelles, Amparo                                              | 2005 |
| Periodontal disease: linking the primary inflammation to bone loss                                                                                                          | Di Benedetto, Adriana; Gigante, Isabella; Colucci, Silvia; Grano, Maria                                                                                                         | 2013 |
| Looking into the future: Using induced pluripotent stem cells to build two and three dimensional ocular tissue for cell therapy and disease modeling                        | Song, Min Jae; Bharti, Kapil                                                                                                                                                    | 2016 |
| Trophoblast'pseudo-tumorigenesis': significance and contributory factors                                                                                                    | Soundararajan, Rama; Rao, A. Jagannadha                                                                                                                                         | 2004 |
| Orthopaedic implant failure: aseptic implant loosening—the contribution and future challenges of mouse models in translational research                                     | Cordova, Luis Alberto; Stresing, Verena; Gobin, Berengere; Rosset, Philippe; Passuti, Norbert; Gouin, Francois; Trichet, Valérie; Layrolle, Pierre; Heymann, Dominique          | 2014 |
| Chronic inflammation in biomaterial-induced periprosthetic osteolysis: NF- $\kappa$ B as a therapeutic target                                                               | Lin, Tzu-hua; Tamaki, Yasunobu; Pajarinen, Jukka; Waters, Heather A.; Woo, Deanna K.; Yao, Zhenyu; Goodman, Stuart B.                                                           | 2014 |
| Combination gene therapy targeting on interleukin-1 $\beta$ and RANKL for wear debris-induced aseptic loosening                                                             | Wang, Hao; Jia, Tang-Hong; Zacharias, Nora; Gong, Weiming; Du, H. X.; Wooley, Paul H.; Yang, Shang-You                                                                          | 2013 |
| Cyclic changes in the matrix metalloproteinase system in the ovary and uterus                                                                                               | Curry Jr, Thomas E.; Osteen, Kevin G.                                                                                                                                           | 2001 |
| Biological functions of hCG and hCG-related molecules                                                                                                                       | Cole, Laurence A.                                                                                                                                                               | 2010 |
| Hyaluronan-mediated angiogenesis in vascular disease: uncovering RHAMM and CD44 receptor signaling pathways                                                                 | Slevin, Mark; Krupinski, Jurek; Gaffney, John; Matou, Sabine; West, David; Delisser, Horace; Savani, Rashmin C.; Kumar, Shant                                                   | 2007 |
| Matrix metalloproteinase-1 and-8 in gingival crevicular fluid during orthodontic tooth movement: a pilot study during 1 month of follow-up after fixed appliance activation | Ingman, Tuula; Apajalahti, Satu; Mäntylä, Päivi; Savolainen, Pirjo; Sorsa, Timo                                                                                                 | 2005 |
| Leukemia inhibitory factor and human endometrial receptivity                                                                                                                | Salamonsen, Lois A.; Menkhorst, Ellen; Dimitriadis, Evdokia                                                                                                                     | 2010 |

|                                                                                                                                                                                             |                                                                                                                                                                                              |      |
|---------------------------------------------------------------------------------------------------------------------------------------------------------------------------------------------|----------------------------------------------------------------------------------------------------------------------------------------------------------------------------------------------|------|
| Commonality in chronic inflammatory diseases: periodontitis, diabetes, and coronary artery disease                                                                                          | Southerland, Janet H.; Taylor, George W.; Moss, Kevin; Beck, James D.; Offenbacher, Steven                                                                                                   | 2006 |
| Angiogenesis in health and disease: insights into basic mechanisms and therapeutic opportunities                                                                                            | Polverini, Peter J.                                                                                                                                                                          | 2002 |
| The effect of seprafilm and interceed on capsule formation around silicone discs in a rat model                                                                                             | Friedman, H. I.; Stonerock, C.; Lefavre, J. F.; Yost, M.                                                                                                                                     | 2004 |
| Matrix metalloproteinases, vascular remodeling, and vascular disease                                                                                                                        | Wang, Xi; Khalil, Raouf A.                                                                                                                                                                   | 2018 |
| Resistance of young gelatinase B-deficient mice to experimental autoimmune encephalomyelitis and necrotizing tail lesions                                                                   | Dubois, Bénédicte; Masure, Stefan; Hurtenbach, Ursula; Paemen, Liesbet; Heremans, Hubertine; van den Oord, Joost; Sciort, Raf; Meinhardt, Thorsten; Hämmerling, Günter; Opdenakker, Ghislain | 1999 |
| The influence of smoking on host responses in periodontal infections                                                                                                                        | Ryder, Mark I.                                                                                                                                                                               | 2007 |
| Immune responses to implants—a review of the implications for the design of immunomodulatory biomaterials                                                                                   | Franz, Sandra; Rammelt, Stefan; Scharnweber, Dieter; Simon, Jan C.                                                                                                                           | 2011 |
| Targeting autophagy to inhibit wear debris-induced osteolysis                                                                                                                               | Camuzard, Olivier; Breuil, Véronique; Carle, Georges F.; Pierrefite-Carle, Valérie                                                                                                           | 2017 |
| Effect of antiadhesion barrier solution and fibrin on capsular formation after silicone implant insertion in a white rat model                                                              | Lee, Seung Geun; Dal Lee, Sang; Kim, Min Kuk; Ryu, Woo Sang; Jung, Seung Pil; Kim, Sangmin; Kim, Hoon Yub; Yoon, Eul Sik; Kim, Chul Hwan; Nam, Seok Jin                                      | 2015 |
| Cell-induced response by tetracyclines on human bone marrow colonized hydroxyapatite and Bonelike®                                                                                          | Gomes, Pedro S.; Santos, J. D.; Fernandes, M. H.                                                                                                                                             | 2008 |
| Genetic susceptibility to total hip arthroplasty failure: a case-control study on the influence of MMP 1 gene polymorphism                                                                  | Yan, Yiguo; Hu, Jianzhong; Lu, Hongbin; Wang, Wenjun                                                                                                                                         | 2014 |
| Medical treatments for endometriosis                                                                                                                                                        | Kappou, D.; Matalliotakis, M.; Matalliotakis, I.                                                                                                                                             | 2010 |
| Osteocyte apoptosis controls activation of intracortical resorption in response to bone fatigue                                                                                             | Cardoso, Luis; Herman, Brad C.; Verborgt, Olivier; Laudier, Damien; Majeska, Robert J.; Schaffler, Mitchell B.                                                                               | 2009 |
| Pharmacological agents for periodontal regeneration: A review                                                                                                                               | Nandini, T. K.; Mahantesha, S.; Mani, R.; Kranti, K.                                                                                                                                         | 2015 |
| Matrix metalloproteinases in coronary artery disease                                                                                                                                        | Mittal, Balraj; Mishra, Avshesh; Srivastava, Anshika; Kumar, Surendra; Garg, Naveen                                                                                                          | 2014 |
| Endothelium-targeted gene and cell-based therapies for cardiovascular disease                                                                                                               | Melo, Luis G.; Gnecci, Massimiliano; Pachori, Alok S.; Kong, Deling; Wang, Kai; Liu, Xiaoli; Pratt, Richard E.; Dzau, Victor J.                                                              | 2004 |
| Recent advances in MMP inhibitor design                                                                                                                                                     | Fisher, Jed F.; Mobashery, Shahriar                                                                                                                                                          | 2006 |
| Decoding implantation and menstruation: the tale of two opposing signals                                                                                                                    | Tabibzadeh, Siamak                                                                                                                                                                           | 2002 |
| Osteoporosis—a risk factor for cardiovascular disease?                                                                                                                                      | Lampropoulos, Christos E.; Papaioannou, Ioanna; D'cruz, David P.                                                                                                                             | 2012 |
| Gingival crevicular fluid IL-6, tPA, PAI-2, albumin levels following initial periodontal treatment in chronic periodontitis patients with or without type 2 diabetes                        | Kardeşler, Levent; Buduneli, Nurcan; Çetinkalp, Şevki; Lappin, David; Kinane, Denis F.                                                                                                       | 2011 |
| Analysis of the transforming growth factor-β1 gene promoter polymorphisms in early osseointegrated implant failure                                                                          | dos Santos, Maria Cristina Leme Godoy; Campos, Maria Isabela Guimarães; Souza, Ana Paula; Scarel-Caminaga, Raquel Mantuanelli; Mazzonetto, Renato; Line, Sergio Roberto Peres                | 2004 |
| Uterine receptivity: alterations associated with benign gynecological disease                                                                                                               | Donaghay, Melissa; Lessey, Bruce A.                                                                                                                                                          | 2007 |
| MMP-1, MMP-9, and TIMP-1 levels in oral lichen planus patients with gingivitis or periodontitis                                                                                             | Ertugrul, Abdullah Seckin; Dursun, Recep; Dundar, Niyazi; Avunduk, Mustafa Cihat; Hakki, Sema Sezgin                                                                                         | 2013 |
| Genes regulating implantation and fetal development: a focus on mouse knockout models                                                                                                       | Sharma, Surendra; Murphy, Shaun P.; Barnea, Eytan R.                                                                                                                                         | 2006 |
| Contributions of human tissue analysis to understanding the mechanisms of loosening and osteolysis in total hip replacement                                                                 | Gallo, Jiri; Vaculova, Jana; Goodman, Stuart B.; Kontinen, Yrjö T.; Thyssen, Jacob P.                                                                                                        | 2014 |
| Biomarkers in periodontal disease                                                                                                                                                           | Pavankumar, A.; Jagdishreddy, G.; Raja Babu, P.                                                                                                                                              | 2015 |
| Matrix metalloproteinases—an overview                                                                                                                                                       | Sekhon, Bhupinder Singh                                                                                                                                                                      | 2010 |
| Estimation of N-terminal telopeptides of type I collagen in periodontal health, disease and after nonsurgical periodontal therapy in gingival crevicular fluid: A clinico-biochemical study | Aruna, G.                                                                                                                                                                                    | 2015 |
| A randomized, controlled, clinical study on a new titanium oxide abutment surface for improved healing and soft tissue health                                                               | Hall, Jan; Neilands, Jessica; Davies, Julia R.; Ekestubbe, Annika; Friberg, Bertil                                                                                                           | 2019 |
| Biocompatibility of polypyrrole with human primary osteoblasts and the effect of dopants                                                                                                    | Fahlgren, Anna; Bratengeier, Cornelia; Gelmi, Amy; Semeins, Cornelis M.; Klein-Nulend, Jenneke; Jager, Edwin WH; Bakker, Astrid D.                                                           | 2015 |
| Anti-inflammatory actions of adjunctive tetracyclines and other agents in periodontitis and associated comorbidities                                                                        | Tilakaratne, Aruni; Soory, Mena                                                                                                                                                              | 2014 |
| Relevance of the plasminogen system in physiology, pathology, and regeneration of oral tissues—From the perspective of dental specialties                                                   | Wehner, Christian; Janjić, Klara; Agis, Hermann                                                                                                                                              | 2017 |
| Human TIMP-3 is expressed during fetal development, hair growth cycle, and cancer progression                                                                                               | Airola, Kristiina; Ahonen, Matti; Johansson, Nina; Heikkilä, Päivi; Kere, Juha; Kähäri, Veli-Matti; Saarialho-Kere, Ulpu K.                                                                  | 1998 |
| Interface tissue fibroblasts from loose total hip replacement prosthesis produce receptor activator of nuclear factor-kappaB ligand, osteoprotegerin, and cathepsin K.                      | Mandelin, Jami; Li, Tian-Fang; Hukkanen, Mika; Liljeström, Mikko; Salo, Jari; Santavirta, Seppo; Kontinen, Yrjö T.                                                                           | 2005 |
| Gene therapeutics for periodontal regenerative medicine                                                                                                                                     | Ramseier, Christoph A.; Abramson, Zachary R.; Jin, Qiming; Giannobile, William V.                                                                                                            | 2006 |
| Host modulatory therapy                                                                                                                                                                     | Bathla, Shalu                                                                                                                                                                                | 2011 |

|                                                                                                                                                                       |                                                                                                                                                         |      |
|-----------------------------------------------------------------------------------------------------------------------------------------------------------------------|---------------------------------------------------------------------------------------------------------------------------------------------------------|------|
| Endocrine and paracrine correlates of endometrial receptivity to blastocyst implantation in the human                                                                 | Ghosh, D.; Sengupta, JAYASREE                                                                                                                           | 2004 |
| Current understanding of genetic polymorphisms as biomarkers for risk of biological complications in implantology                                                     | Del Valle, Asier Eguía; López-Vicente, José; Martínez-Conde, Rafael; Aguirre-Zorzano, Luis-Antonio                                                      | 2018 |
| Potential biochemical markers of uterine receptivity                                                                                                                  | Giudice, Linda C.                                                                                                                                       | 1999 |
| Macrophages and bone inflammation                                                                                                                                     | Gu, Qiaoli; Yang, Huilin; Shi, Qin                                                                                                                      | 2017 |
| Bisphosphonate-associated osteonecrosis of the jaws: surgical treatment with ErCrYSGG-laser. Case report                                                              | Rugani, Petra; Acham, Stephan; Truschneegg, Astrid; Obermayer-Pietsch, Barbara; Jakse, Norbert                                                          | 2010 |
| Cellular turnover and extracellular matrix remodeling in female reproductive tissues: functions of metalloproteinases and their inhibitors                            | Fata, J. E.; Ho, AT-V.; Leco, K. J.; Moorehead, R. A.; Khokha, R.                                                                                       | 2000 |
| Cytokines-adhesion molecules-invasive proteinases. The missing paracrine/autocrine link in embryonic implantation                                                     | Simon, C.; Gimeno, Maria Jose; Mercader, Amparo; Frances, Ana; Garcia Velasco, J.; Remohi, Jose; Polan, Mary Lake; Pellicer, Antonio                    | 1996 |
| The association between neutrophil numbers and interleukin-1 $\alpha$ concentrations in gingival crevicular fluid of smokers and non-smokers with periodontal disease | Petropoulos, Georgios; McKay, Ian J.; Hughes, Francis J.                                                                                                | 2004 |
| Osseointegration—Molecular events at the bone–implant interface: A review                                                                                             | Chug, Ashi; Shukla, Sagrika; Mahesh, Lanka; Jadwani, Sanjay                                                                                             | 2013 |
| Differential expression of receptor activator of nuclear factor- $\kappa$ B ligand and osteoprotegerin mRNA in periodontal diseases                                   | Bostanci, N.; Ilgenli, T.; Emingil, G.; Afacan, B.; Han, B.; Töz, H.; Berdeli, A.; Atilla, G.; McKay, I. J.; Hughes, F. J.                              | 2007 |
| Fibroblast adhesion and activation onto micro-machined titanium surfaces                                                                                              | Guillem-Marti, Jordi; Delgado, L.; Godoy-Gallardo, Maria; Pegueroles, M.; Herrero, Mariano; Gil, F. J.                                                  | 2013 |
| Expression of cadherins and CD44 isoforms in human endometrium and peritoneal endometriosis                                                                           | Poncelet, Christophe; Leblanc, Marc; Walker-Combrouze, Francine; Soriano, David; Feldmann, Gérard; Madelenat, Patrick; Scoazec, Jean-Yves; Daraï, Emile | 2002 |
| Gingival crevicular fluid interleukin-1 $\beta$ , prostaglandin E2 and periodontal status in a community population                                                   | Zhong, Y.; Slade, G. D.; Beck, J. D.; Offenbacher, S.                                                                                                   | 2007 |
| Animal models for craniofacial reconstruction by stem/stromal cells                                                                                                   | Liu, Na; Lyu, Xue; Fan, Huanhuan; Shi, Jing; Hu, Jing; Luo, En                                                                                          | 2014 |
| The in vivo expression of the collagenolytic matrix metalloproteinases (MMP-2,-8,-13, and-14) and matrilysin (MMP-7) in adult and localized juvenile periodontitis    | Tervahartiala, Taina; Pirilä, Emma; Ceponis, Arnoldas; Maisi, Päivi; Salo, Tuula; Tuter, G.; Kallio, P.; Törnwall, J.; Srinivas, R.; Konttinen, Y. T.   | 2000 |
| Future prospects of systemic host modulatory agents in periodontal therapy                                                                                            | Gokhale, S. R.; Padhye, A. M.                                                                                                                           | 2013 |
| Does the relaxin, estrogen and matrix metalloproteinase axis contribute to degradation of TMJ fibrocartilage?                                                         | Kapila, S.                                                                                                                                              | 2003 |
| Probiotic intervention influences the salivary levels of Matrix Metalloproteinase (MMP)-9 and Tissue Inhibitor of metalloproteinases (TIMP)-1 in healthy adults       | Jäsberg, Heli; Tervahartiala, Taina; Sorsa, Timo; Söderling, Eva; Haukioja, Anna                                                                        | 2018 |
| Local application of statins in the treatment of experimental periodontal disease in rats                                                                             | SANTOS, Bianca Fernanda Espósito; SOUZA, Eduardo Quintão Manhanini; BRIGAGÃO, Máisa Ribeiro Pereira Lima; FERNANDES, Leandro Araújo                     | 2017 |
| ADAM-TS5, ADAM-TS6, and ADAM-TS7, Novel Members of a New Family of Zinc Metalloproteases GENERAL FEATURES AND GENOMIC DISTRIBUTION OF THE ADAM-TS FAMILY              | Hurskainen, Tiina L.; Hirohata, Satoshi; Seldin, Michael F.; Apte, Suneel S.                                                                            | 1999 |
| DNA methylation in mammalian development and disease                                                                                                                  | Dean, Wendy; Lucifero, Diana; Santos, Fátima                                                                                                            | 2005 |
| A functional interleukin-1 $\beta$ gene polymorphism is associated with chronic periodontitis in a sample of Brazilian individuals                                    | Moreira, Paula R.; De Sá, Alessandra R.; Xavier, Guilherme M.; Costa, José E.; Gomez, Ricardo S.; Gollob, Kenneth J.; Dutra, Walderez O.                | 2005 |
| The role of immuno-inflammatory response in the pathogenesis of chronic periodontitis and development of chair-side point of care diagnostics                         | Hernández, Marcela; Vernal, Rolando; Sorsa, Timo; Tervahartiala, Taina; Mäntylä, Päivi; Gamonal, Jorge                                                  | 2012 |
| The determination of pH of peri-implant crevicular fluid around one-piece and two-piece dental implants: A pilot study                                                | Karpavicius, Dainius; Stasikelyte, Morta; Baseviciene, Nomedas; Sakalauskaitė, Urte; Ratkute, Saule; Razukevicius, Dainius                              | 2019 |
| Heterogeneity in the collagen-degrading ability of Porphyromonas gingivalis-stimulated human gingival fibroblasts                                                     | Zhou, J.; Windsor, L. J.                                                                                                                                | 2007 |
| Decreased levels of interleukin-18 in peritoneal fluid but not in serum of patients with endometriosis                                                                | Zhang, Xinmei; Lin, Jun; Qian, Yuli; Deng, Lin                                                                                                          | 2004 |
| Activation of matrix metalloproteinase-8 by membrane type 1-MMP and their expression in human tears after photorefractive keratectomy                                 | Holopainen, Juha M.; Moilanen, Jukka AO; Sorsa, Timo; Kivelä-Rajamäki, Marjo; Tervahartiala, Taina; Vesaluoma, Minna H.; Tervo, Timo MT                 | 2003 |
| Matrix metalloproteinase-2 production and its binding to the matrix are increased in abdominal aortic aneurysms                                                       | Davis, Valerie; Persidskaia, Raisa; Baca-Regen, Lisa; Itoh, Yoshifumi; Nagase, Hideaki; Persidsky, Yuri; Ghorpade, Anuja; Baxter, B. Timothy            | 1998 |
| Effects of tetracyclines on bone metabolism                                                                                                                           | Vernillo, A. T.; Rifkin, B. R.                                                                                                                          | 1998 |
| Why does the fallopian tube fail in ectopic pregnancy? The role of activins, inducible nitric oxide synthase, and MUC1 in ectopic implantation                        | Refaat, Bassem; Simpson, Hannah; Britton, Elizabeth; Biswas, Jhulan; Wells, Michael; Aplin, John D.; Ledger, William                                    | 2012 |
| Maintenance therapy for teeth and implants                                                                                                                            | Mombelli, Andrea                                                                                                                                        | 2019 |
| The influence of diabetes on gingival crevicular fluid $\beta$ -glucuronidase and interleukin-8                                                                       | Engebretson, Steven P.; Vossughi, Farnak; Hey-Hadavi, Judith; Emingil, Gülnur; Grbic, John T.                                                           | 2006 |
| Relaxin peptides are new global players                                                                                                                               | Ivell, Richard; Einspanier, Almuth                                                                                                                      | 2002 |



|                                                                                                                                                                                                                                       |                                                                                                                                                                                   |      |
|---------------------------------------------------------------------------------------------------------------------------------------------------------------------------------------------------------------------------------------|-----------------------------------------------------------------------------------------------------------------------------------------------------------------------------------|------|
| The analysis of matrix metalloproteinase-8 in gingival crevicular fluid and periodontal diseases                                                                                                                                      | Kasuma, Nila; Oenzil, Fadil; Darwin, Eryati; Sofyan, Yanwirasti                                                                                                                   | 2018 |
| Adhesion of Porphyromonas gingivalis and Tannerella forsythia to dentin and titanium with sandblasted and acid etched surface coated with serum and serum proteins—An in vitro study                                                  | Eick, Sigrun; Kindblom, Christian; Mizgalska, Danuta; Magdoń, Anna; Jurczyk, Karolina; Sculean, Anton; Stavropoulos, Andreas                                                      | 2017 |
| Regulation of leukocyte adhesion and signaling in inflammation and disease                                                                                                                                                            | Wahl, S. M.; Feldman, G. M.; McCarthy, J. B.                                                                                                                                      | 1996 |
| Progression of periodontal destruction and the roles of advanced glycation end products in experimental diabetes                                                                                                                      | Chang, Po-Chun; Chien, Li-Ying; Yeo, Jin Fei; Wang, Yi-Ping; Chung, Min-Chun; Chong, Li Yen; Kuo, Mark Yen-Ping; Chen, Chun-Hao; Chiang, Huan-Ching; Ng, Benjamin N.              | 2013 |
| Disease-associated particulates and joint inflammation; mechanistic insights and potential therapeutic targets                                                                                                                        | Mahon, Olwyn R.; Dunne, Aisling                                                                                                                                                   | 2018 |
| Pharmaceutical compositions and methods relating to inhibiting fibrous adhesions or inflammatory disease using low sulphate fucans                                                                                                    | Cashman, Johanne; Springate, Christopher; Winternitz, Charles                                                                                                                     | 2008 |
| Gene therapy for cardiovascular disease: a case for cautious optimism                                                                                                                                                                 | Khurana, Rohit; Martin, John F.; Zachary, Ian                                                                                                                                     | 2001 |
| Contribution of nanotechnology to improved treatment of periodontal disease                                                                                                                                                           | Zupancic, Spela; Kocbek, Petra; Baumgartner, Sasa; Kristl, Julijana                                                                                                               | 2015 |
| Cytokine regulation during the formation of the fetal–maternal interface: focus on cell–cell adhesion and remodelling of the extra-cellular matrix                                                                                    | McEwan, Miranda; Lins, Roger J.; Munro, Sheryl K.; Vincent, Zoe L.; Ponnampalam, Anna P.; Mitchell, Murray D.                                                                     | 2009 |
| The zymographic evaluation of gelatinase (MMP-2 and-9) levels in acute and chronic periapical abscesses                                                                                                                               | Buzoglu, Hatice Dogan; Unal, Hasan; Ulger, Celal; Mert, Safak; Kücükylidirim, Sibel; Er, Nuray                                                                                    | 2009 |
| A baboon model for endometriosis: implications for fertility                                                                                                                                                                          | Hastings, Julie M.; Fazleabas, Asgerally T.                                                                                                                                       | 2006 |
| Local delivery of dexamethasone for prevention of neointimal proliferation in a rat model of balloon angioplasty.                                                                                                                     | Villa, Augusto E.; Guzman, Luis A.; Chen, Weiliam; Golomb, Gershon; Levy, Robert J.; Topol, Eric J.                                                                               | 1994 |
| Local cellular responses to titanium dioxide from orthopedic implants                                                                                                                                                                 | Yao, Jie J.; Lewallen, Eric A.; Trousdale, William H.; Xu, Wei; Thaler, Roman; Salib, Christopher G.; Reina, Nicolas; Abdel, Matthew P.; Lewallen, David G.; van Wijnen, Andre J. | 2017 |
| Matrix metalloproteinase inhibition: A review of anti-tumour activity: Matrix metalloproteinase inhibition: A review of anti-tumour activity                                                                                          | Brown, P. D.; Giavazzi, R.                                                                                                                                                        | 1995 |
| Proteomic approaches in endometriosis research                                                                                                                                                                                        | Poliness, Anne E.; Healey, Martin G.; Brennecke, Shaun P.; Moses, Eric K.                                                                                                         | 2004 |
| Recent updates on electronic cigarette aerosol and inhaled nicotine effects on periodontal and pulmonary tissues                                                                                                                      | Javed, Fawad; Kellesarian, Sergio V.; Sundar, Isaac K.; Romanos, Georgios E.; Rahman, Irfan                                                                                       | 2017 |
| The effect of leptin on mouse trophoblast cell invasion                                                                                                                                                                               | Schulz, Laura C.; Widmaier, Eric P.                                                                                                                                               | 2004 |
| Therapeutic intervention for wear debris-induced aseptic implant loosening                                                                                                                                                            | Ren, Ke; Dusad, Anand; Zhang, Yijia; Wang, Dong                                                                                                                                   | 2013 |
| Human viruses in periodontitis                                                                                                                                                                                                        | Slots, Jørgen                                                                                                                                                                     | 2010 |
| Osteogenic regenerative scaffold matrix composition                                                                                                                                                                                   | Elazizi, Mohamad; Murray, Peter; Temple, H. Thomas                                                                                                                                | 2017 |
| Progesterone in peri- and postmenopause: a review                                                                                                                                                                                     | Regidor, P.-A.                                                                                                                                                                    | 2014 |
| Plasma levels of N-telopeptide of Type I collagen in periodontal health, disease and after treatment                                                                                                                                  | Aruna, Ganganna                                                                                                                                                                   | 2016 |
| Infections associated with implanted dental devices                                                                                                                                                                                   | Belibasakis, Georgios N.; Thurnheer, Thomas; Bostanci, Nagihan                                                                                                                    | 2013 |
| Matrix metalloproteinase-2 may be involved with increased bone loss associated with experimental periodontitis and smoking: A study in rats                                                                                           | Neto, João Batista César; de Souza, Ana Paula; Barbieri, Deise; Moreno, Heitor; Sallum, Enilson Antonio; Nociti, Francisco Humberto                                               | 2004 |
| Soft tissue healing in alveolar socket preservation technique: histologic evaluations                                                                                                                                                 | DavideFarronato, D. D. S.                                                                                                                                                         | 2014 |
| Mt1-mmp mediates muc1 shedding independent of tace/adam17                                                                                                                                                                             | Thathiah, Amantha; Carson, Daniel D.                                                                                                                                              | 2004 |
| A Comparison Of Il-1β, E2 (Pge2), Pai-2 and Tnf-Α Levels in Gingival Crevicular Fluid (Gcf) and Peri-Implant Crevicular Fluid (Picf) from Groups of Patients with Healthy Teeth, Healthy Implants, Periodontitis and Peri-Implantitis | Ketabi, A. R.; Friese, H.; Weber, H.                                                                                                                                              | 2017 |
| A call for a standard classification system for future biologic research: the rationale for new PRP nomenclature                                                                                                                      | Mautner, Kenneth; Malanga, Gerard A.; Smith, Jay; Shiple, Brian; Ibrahim, Victor; Sampson, Steven; Bowen, Jay E.                                                                  | 2015 |
| Effects of low-level laser therapy in orthodontic patients on immediate inflammatory response after mini-implants insertion: a preliminary report                                                                                     | Yanaguizawa, Mario S.; Suzuki, Selly S.; Martinez, Elizabeth F.; Suzuki, Hideo; Pelegrin, Maria Cristina J.; Garcez, Aguinaldo S.                                                 | 2017 |
| Particular aspects of periodontal disease Pathogenesis                                                                                                                                                                                | Dumitrescu, Alexandrina L.; Tanaka, Masashi                                                                                                                                       | 2010 |
| Macrophages, foreign body giant cells and their response to implantable biomaterials                                                                                                                                                  | Sheikh, Zeeshan; Brooks, Patricia; Barzilay, Oriyah; Fine, Noah; Glogauer, Michael                                                                                                | 2015 |
| In vitro characterization of microbial biofilm on soft materials used in overdentures retained by mini implants                                                                                                                       | Preoteasa, Cristina Teodora; Preoteasa, Elena; Popa, Marcela; Pircalabioru Gradisteanu, G.; Grigore, Raluca; Marutescu, Luminita                                                  | 2019 |
| Messenger ribonucleic acid expression of 16 matrix metalloproteinases in bone–implant interface tissues of loose artificial hip joints                                                                                                | Takei, Isao; Takagi, Michiaki; Santavirta, Seppo; Ida, Hideo; Ishii, Masaji; Ogino, Toshihiko; Ainola, Mari; Kontinen, Yrjö T.                                                    | 2000 |
| Antimicrobial properties of plasma rich in growth factors (PRGF-ENDORET) technology                                                                                                                                                   | Anitua, E.; Muruzabal, F.; Orive, G.                                                                                                                                              | 2011 |
| Short versus standard length implants: a case series analysis                                                                                                                                                                         | Boni, W.; Delle Donne, U.; Corradini, G.; Tettamanti, L.; Tagliabue, A.                                                                                                           | 2015 |
| Smoking and Periodontal Diseases                                                                                                                                                                                                      | Torkzaban, Parviz; Khalili, Zahra; Ziaei, Narges                                                                                                                                  | 2013 |

|                                                                                                                                                                                     |                                                                                                                                                                                                 |      |
|-------------------------------------------------------------------------------------------------------------------------------------------------------------------------------------|-------------------------------------------------------------------------------------------------------------------------------------------------------------------------------------------------|------|
| The role and regulation of the uterine matrix metalloproteinase system in menstruating and non-menstruating species                                                                 | Zhang, Xuan; Nothnick, Warren B.                                                                                                                                                                | 2005 |
| Biomarkers of alveolar bone resorption in gingival crevicular fluid: a systematic review                                                                                            | Almehmadi, Ahmad H.; Alghamdi, Faisal                                                                                                                                                           | 2018 |
| Alzheimer's disease and peripheral infections: the possible contribution from periodontal infections, model and hypothesis                                                          | Kamer, Angela R.; Dasanayake, Ananda P.; Craig, Ronald G.; Glodzik-Sobanska, Lidia; Bry, Mirosław; De Leon, Mony J.                                                                             | 2008 |
| Bisphosphonates in Oral Diseases: Updates of its implications in Dental Management                                                                                                  | Jayalakshmi, K.; Naidu, H. Jaya; Patil, Archana                                                                                                                                                 | 2012 |
| Extracellular matrix 5: adhesive interactions in early mammalian embryogenesis, implantation, and placentation.                                                                     | Damsky, C.; Sutherland, A.; Fisher, Sh                                                                                                                                                          | 1993 |
| Tissue repair, contraction, and the myofibroblast                                                                                                                                   | Desmoulière, Alexis; Chaponnier, Christine; Gabbiani, Giulio                                                                                                                                    | 2005 |
| Human $\beta$ -defensin 2 and protease activated receptor-2 expression in patients with chronic periodontitis                                                                       | Pereira, Alexandre Lustosa; Holzhausen, Marinella; Franco, Gilson César Nobre; Cortelli, Sheila Cavalca; Cortelli, José Roberto                                                                 | 2012 |
| Elevated levels of fragmented laminin-5 $\gamma$ 2-chain in bronchoalveolar lavage fluid from dogs with pulmonary eosinophilia                                                      | Rajamäki, Minna M.; Järvinen, Anna-Kaisa; Sorsa, Timo A.; Tervahartiala, Taina I.; Maisi, Päivi S.                                                                                              | 2006 |
| Biofunctional coatings for dental implants                                                                                                                                          | Chen, Xi; Li, Yuping; Aparicio, Conrado                                                                                                                                                         | 2013 |
| Mechanical stretching of mouse calvarial osteoblasts in vitro models changes in MMP-2 and MMP-9 expression at the bone-implant interface                                            | Nichols Jr, Richard A.; Niagro, Frank D.; Borke, James L.; Cuenin, Michael F.                                                                                                                   | 2016 |
| The many faces of EMMPRIN—roles in neuroinflammation                                                                                                                                | Agrawal, Smriti M.; Yong, V. Wee                                                                                                                                                                | 2011 |
| Cathepsin protease inhibition reduces endometriosis lesion establishment                                                                                                            | Porter, Kristi M.; Wieser, Friedrich A.; Wilder, Catera L.; Sidell, Neil; Platt, Manu O.                                                                                                        | 2016 |
| Cystatin C: an emerging biomarker in cardiovascular disease                                                                                                                         | Angelidis, Christos; Deftereos, Spyridon; Giannopoulos, Georgios; Anotoliotakis, Nikolaos; Bouras, Georgios; Hatzis, Georgios; Panagopoulou, Vasiliki; Pyrgakis, Vlasios; W Cleman, Michael     | 2013 |
| Biofilm formation on implants and prosthetic dental materials                                                                                                                       | Rimondini, Lia; Cochis, Andrea; Varoni, Elena; Azzimonti, Barbara; Carrassi, Antonio                                                                                                            | 2016 |
| The anti-inflammation effects of resveratrol for patients after oral implantology                                                                                                   | BaGen, HaSi; Liu, XiaoFei; Han, Jing                                                                                                                                                            | 2018 |
| A functional overlap of plasminogen and MMPs regulates vascularization during placental development                                                                                 | Solberg, Helene; Rinkenberger, Julie; Danø, Keld; Werb, Zena; Lund, Leif R.                                                                                                                     | 2003 |
| Early failure of dental implants and TNF- $\alpha$ (G-308A) gene polymorphism                                                                                                       | Campos, Maria Isabela Guimarães; dos Santos, Maria Cristina Leme Godoy; Trevilatto, Paula Cristina; Scarel-Caminaga, Raquel Mantuaneli; Bezerra, Fábio José Barbosa; Line, Sergio Roberto Peres | 2004 |
| Future Perspectives of Bisphosphonates in Maxillofacial, Dental, and Medical Practice                                                                                               | Smeets, Ralf; Hanken, Henning; Jung, Ole; Heiland, Max                                                                                                                                          | 2015 |
| The scientific basis and development of a matrix metalloproteinase (MMP)-8 specific chair-side test for monitoring of periodontal health and disease from gingival crevicular fluid | Mäntylä, Päivi                                                                                                                                                                                  | 2006 |
| Fetal programming theory: implication for the understanding of endometriosis                                                                                                        | Kobayashi, Hiroshi; Iwai, Kana; Niino, Emiko; Morioka, Sachiko; Yamada, Yuki                                                                                                                    | 2014 |
| HOXA11 and MMP2 gene expression in uterosacral ligaments of women with pelvic organ prolapse                                                                                        | Yılmaz, Nafiye; Ozaksit, Gülnur; Terzi, Yunus Kasım; Yılmaz, Saynur; Budak, Burcu; Aksakal, Orhan; Şahin, Feride İffet                                                                          | 2014 |
| Follistatin and the breast implant capsule                                                                                                                                          | Frenkiel, Brett A.; Temple-Smith, Peter; De Kretser, David; Southwick, Graeme J.                                                                                                                | 2017 |
| Th17 cells in human disease                                                                                                                                                         | Tesmer, Laura A.; Lundy, Steven K.; Sarkar, Sujata; Fox, David A.                                                                                                                               | 2008 |
| Release and activation of matrix metalloproteinase 8 from human neutrophils triggered by the leukotoxin of <i>Actinobacillus actinomycetemcomitans</i>                              | Claesson, Rolf; Johansson, Anders; Belibasakis, G.; Hånström, L.; Kalfas, S.                                                                                                                    | 2002 |
| Molecular mediators of macrophage fusion                                                                                                                                            | Helming, Laura; Gordon, Siamon                                                                                                                                                                  | 2009 |
| Animal models of implantation                                                                                                                                                       | Lee, Kevin Y.; DeMayo, Francesco J.                                                                                                                                                             | 2004 |
| Relationship of cigarette smoking to the subgingival microbiota                                                                                                                     | Haffajee, A. D.; Socransky, S. S.                                                                                                                                                               | 2001 |
| The emerging role of the bone marrow-derived stem cells in (therapeutic) angiogenesis                                                                                               | Carmeliet, Peter; Luttun, Aernout                                                                                                                                                               | 2001 |
| Simultaneous analysis of multiple serum proteins adhering to the surface of medical grade polydimethylsiloxane elastomers                                                           | Backovic, Aleksandar; Wolfram, Dolores; Del-Frari, Barbara; Piza, Hildegunde; Huber, Lukas A.; Wick, Georg                                                                                      | 2007 |
| Serum tissue inhibitors of metalloproteinase-1 and-2 in patients with non-small cell lung cancer                                                                                    | Suemitsu, Ryuichi; Yoshino, Ichiro; Tomiyasu, Makiko; Fukuyama, Seiichi; Okamoto, Tatsuro; Maehara, Yoshihiko                                                                                   | 2004 |
| Thoracoabdominal aneurysm disease                                                                                                                                                   | Richards, J. M. J.; Moores, C.; Nimmo, A.; Chalmers, R. T. A.                                                                                                                                   | 2008 |
| Barrier membranes for dental applications: A review and sweet advancement in membrane developments                                                                                  | Rodríguez, I. A.; Selders, G. S.; Fetz, A. E.; Gehrmann, C. J.; Stein, S. H.; Evensky, J. A.; Green, M. S.; Bowlin, G. L.                                                                       | 2018 |
| Basigin-mediated gene expression changes in mouse uterine stromal cells during implantation                                                                                         | Chen, Li; Belton Jr, Robert J.; Nowak, Romana A.                                                                                                                                                | 2009 |
| Neutrophil migration into the gingival sulcus is associated with transepithelial gradients of interleukin-8 and ICAM-1                                                              | Tonetti, Maurizio S.; Imboden, Martin A.; Lang, Niklaus P.                                                                                                                                      | 1998 |
| Extracellular matrix as a bioactive material for soft tissue reconstruction                                                                                                         | Hodde, Jason                                                                                                                                                                                    | 2006 |
| Pro-inflammatory and anti-inflammatory circulating cytokines and periprosthetic osteolysis                                                                                          | Fiorito, S.; Magrini, L.; Goelard, C.                                                                                                                                                           | 2003 |

|                                                                                                                                                                             |                                                                                                                                                                                                           |      |
|-----------------------------------------------------------------------------------------------------------------------------------------------------------------------------|-----------------------------------------------------------------------------------------------------------------------------------------------------------------------------------------------------------|------|
| Human cytotrophoblast expression of the von Hippel–Lindau protein is downregulated during uterine invasion in situ and upregulated by hypoxia in vitro                      | Genbacev, Olga; Krtolica, Ana; Kaelin, William; Fisher, Susan J.                                                                                                                                          | 2001 |
| Enhanced production and activation of matrix metalloproteinase-7 (matrilysin) in human endometrial carcinomas                                                               | Ueno, Hirohisa; Yamashita, Kaname; Azumano, Isao; Inoue, Masaki; Okada, Yasunori                                                                                                                          | 1999 |
| Host-derived biomarkers in gingival crevicular fluid for complementary diagnosis of apical periodontitis                                                                    | Garrido, Mauricio; Dezerega, Andrea; Castro-Martínez, Alfredo; Hernández, Marcela                                                                                                                         | 2014 |
| Characterization of proteoglycan metabolites in human gingival crevicular fluid during orthodontic tooth movement                                                           | Waddington, R. J.; Embery, G.; Samuels, R. H. A.                                                                                                                                                          | 1994 |
| Trophic macrophages in development and disease                                                                                                                              | Pollard, Jeffrey W.                                                                                                                                                                                       | 2009 |
| Collagen membrane and immune response in guided bone regeneration: recent progress and perspectives                                                                         | Chu, Chenyu; Deng, Jia; Sun, Xianchang; Qu, Yili; Man, Yi                                                                                                                                                 | 2017 |
| Cytokine levels in sites of chronic periodontitis of poorly controlled and well-controlled type 2 diabetic subjects                                                         | Santos, Vanessa Renata; Ribeiro, Fernanda Vieira; Lima, Jadson Almeida; Napimoga, Marcelo Henrique; Bastos, Marta Ferreira; Duarte, Poliana Mendes                                                        | 2010 |
| New generation contraceptives: interleukin 11 family cytokines as non-steroidal contraceptive targets                                                                       | Dimitriadis, E.; Menkhurst, E.                                                                                                                                                                            | 2011 |
| Chemical inhibition of matrix metalloproteinases for periodontal treatment                                                                                                  | Ozmeric, Nurdan; Gokmenoglu, Ceren                                                                                                                                                                        | 2015 |
| CyPA and Emmprin play a role in peri-implantitis                                                                                                                            | Yang, Lei; Zhu, Qing; Gong, Jingjue; Xie, Ming; Jiao, Ting                                                                                                                                                | 2018 |
| Enhanced osteoclastogenesis in patients with tophaceous gout: urate crystals promote osteoclast development through interactions with stromal cells                         | Dalbeth, Nicola; Smith, Timothy; Nicolson, Bridget; Clark, Barnaby; Callon, Karen; Naot, Dorit; Haskard, Dorian O.; McQueen, Fiona M.; Reid, Ian R.; Cornish, Jillian                                     | 2008 |
| Filifactor alocis: The newly discovered kid on the block with special talents                                                                                               | Aruni, W.; Chioma, O.; Fletcher, H. M.                                                                                                                                                                    | 2014 |
| CD147 immunoglobulin superfamily receptor function and role in pathology                                                                                                    | Iacono, Kathryn T.; Brown, Amy L.; Greene, Mark I.; Saouaf, Sandra J.                                                                                                                                     | 2007 |
| Expression of matrix metalloproteinases-2,-9 and reversion-inducing cysteine-rich protein with Kazal motifs in gingiva in periodontal health and disease                    | Liu, Nian; Cao, Yingguang; Zhu, Guangxun                                                                                                                                                                  | 2017 |
| Short-term and long-term effects of orthopedic biodegradable implants                                                                                                       | Amini, Ami R.; Wallace, James S.; Nukavarapu, Syam P.                                                                                                                                                     | 2011 |
| Trends in Molecular Medicine: Matrix metalloproteinases and their inhibitors in tumour growth and invasion                                                                  | Kähäri, Veli-Matti; Saarialho-Kere, Ulpu                                                                                                                                                                  | 1999 |
| Identification of gingival crevicular fluid sampling, analytical methods, and oral biomarkers for the diagnosis and monitoring of periodontal diseases: A systematic review | Nazar Majeed, Zeyad; Philip, Koshy; Alabsi, A. M.; Pushparajan, Saravanan; Swaminathan, Dasan                                                                                                             | 2016 |
| Metalloproteinases (MMPs) of the extracellular matrix in dentistry                                                                                                          | Pereira Prado, Vanesa; Asquino, Natalia; Apellaniz, Delmira; Bueno Rossy, Luis; Tapia, Gabriel; Bologna Molina, Ronell                                                                                    | 2016 |
| Informational Paper: Modulation of the Host Response in Periodontal Therapy                                                                                                 | Research; Committee, Therapy                                                                                                                                                                              | 2002 |
| Genes involved in implantation                                                                                                                                              | Salamonsen, Lois A.; Nie, Guiying; Dimitriadis, Eva; Robb, Lorraine; Findlay, Jock K.                                                                                                                     | 2001 |
| Endometriosis is an inflammatory disease                                                                                                                                    | Mahutte, Neal G.; Kayisli, Umit; Arici, Aydin                                                                                                                                                             | 2004 |
| Inflammatory reaction—communication of cells                                                                                                                                | Terheyden, Hendrik; Stadlinger, Bernd; Sanz, Mariano; Garbe, Annette I.; Meyle, Jörg                                                                                                                      | 2014 |
| Efeito da nicotina no metabolismo ósseo: consequências a nível da osseointegração de implantes dentários.                                                                   | Santos, Helder Fernando Lima                                                                                                                                                                              | 2012 |
| Topical drug delivery: An essential aid in the management of oral diseases                                                                                                  | Shastri, Shilpa Padar; Sanjay, C. J.; Kaul, Rachna; Mahima, V. G.; Doggalli, Nagabhushana                                                                                                                 | 2015 |
| Effect of S-PRG eluate on biofilm formation and enzyme activity of oral bacteria                                                                                            | Yoneda, Masahiro; Suzuki, Nao; Masuo, Yosuke; Fujimoto, Akie; Iha, Kosaku; Yamada, Kazuhiko; Iwamoto, Tomoyuki; Hirofujii, Takao                                                                          | 2012 |
| Cross-susceptibility between periodontal disease and type 2 diabetes mellitus: an immunobiological perspective                                                              | Preshaw, Philip M.; Foster, Neil; Taylor, John J.                                                                                                                                                         | 2007 |
| Effect of MMP-1 polymorphism on early term osseointegrated dental implant failure: A pilot study.                                                                           | Arisan, Volkan; Karabuda, Cüneyt; Özdemir, Tayfun                                                                                                                                                         | 2005 |
| Homing of endogenous stem/progenitor cells for in situ tissue regeneration: promises, strategies, and translational perspectives                                            | Chen, Fa-Ming; Wu, Li-An; Zhang, Min; Zhang, Rong; Sun, Hai-Hua                                                                                                                                           | 2011 |
| Polymerase chain reaction (PCR)-based methods: Promising molecular tools in dentistry                                                                                       | Shahi, Shahriar; Vahed, Sepideh Zununi; Fathi, Nazanin; Sharifi, Simin                                                                                                                                    | 2018 |
| Molecular forms and fragments of salivary MMP-8 in relation to periodontitis                                                                                                | Gürsoy, Ulvi K.; Könönen, Eija; Tervahartiala, Taina; Gürsoy, Mervi; Pitkänen, Jari; Torvi, Paula; Suominen, Anna Liisa; Pussinen, Pirkko; Sorsa, Timo                                                    | 2018 |
| Optimizing dentin bond durability: control of collagen degradation by matrix metalloproteinases and cysteine cathepsins                                                     | Tjäderhane, Leo; Nascimento, Fabio D.; Breschi, Lorenzo; Mazzoni, Annalisa; Tersariol, Ivarne LS; Geraldini, Saulo; Tezvergil-Mutluay, Arzu; Carrilho, Marcela R.; Carvalho, Ricardo M.; Tay, Franklin R. | 2013 |
| The connective tissue growth factor/cysteine-rich 61/nephroblastoma overexpressed (CCN) family                                                                              | Brigstock, David R.                                                                                                                                                                                       | 1999 |
| Assessment of 25-Hydroxy Vitamin D3 and Osteocalcin in Chronic Periodontitis Patient (Clinical and Laboratory Study)                                                        | Matouga, Assad Assad Amara; El-Shinnawi, Una Mohamed; Hesham, AL-Sharkawy; El-Farahaty, Reham Mohammed                                                                                                    | 2014 |
| Increased expression and processing of ADAM 12 (meltrin-alpha) in osteolysis associated with aseptic loosening of total hip replacement implants.                           | Ma, Guofeng; Ainola, Mari; Liljeström, Mikko; Santavirta, Seppo; Poduval, Praseet; Zhao, Desheng; Chen, Tong; Konttinen, Yrjö T.                                                                          | 2005 |

|                                                                                                                                                                                         |                                                                                                                                                                                             |      |
|-----------------------------------------------------------------------------------------------------------------------------------------------------------------------------------------|---------------------------------------------------------------------------------------------------------------------------------------------------------------------------------------------|------|
| Drug target for preventing and treating periodontal disease, improving healing of periodontal wounds and promoting oral health                                                          | Ny, Tor; Li, Jinan; Guo, Yongzhi; Lindh, Tomas                                                                                                                                              | 2010 |
| Current Approaches Including Novel Nano/Microtechniques to Reduce Silicone Implant-Induced Contracture with Adverse Immune Responses                                                    | Kang, Shin; Sutthiwanjampa, Chanutchamon; Heo, Chan; Kim, Woo; Lee, Soo-Hong; Park, Hansoo                                                                                                  | 2018 |
| Host modulation therapeutics in periodontics: role as an adjunctive periodontal therapy                                                                                                 | Shinwari, Muhammad Saad; Tanwir, Farzeen; Hyder, Pakiza Raza; Bin Saeed, Muhammad Humza                                                                                                     | 2014 |
| Association of thalassemia major and gingival inflammation: A pilot study                                                                                                               | Gumus, Pinar; Kahraman-Ceneli, Selda; Akcali, Aliye; Sorsa, Timo; Tervahartiala, Taina; Buduneli, Nurcan; Ozcaka, Ozgun                                                                     | 2016 |
| Polyethylene wear particle induced osteolysis in total hip replacement                                                                                                                  | Patil, Nilesh; Jin, Wen Tao; Mow, Christopher SC                                                                                                                                            | 2008 |
| Soft tissue engineering with micronized-gingival connective tissues                                                                                                                     | Noda, Sawako; Sumita, Yoshinori; Ohba, Seigo; Yamamoto, Hideyuki; Asahina, Izumi                                                                                                            | 2018 |
| Actinobacillus actinomycetemcomitans lipopolysaccharide induces interleukin-6 expression through multiple mitogen-activated protein kinase pathways in periodontal ligament fibroblasts | Patil, C.; Rossa Jr, C.; Kirkwood, K. L.                                                                                                                                                    | 2006 |
| Evaluation of GCF MMP-1, MMP-8, TGF- $\beta$ 1, PDGF-AB, and VEGF levels in periodontally healthy smokers                                                                               | EREN, GÜLNİHAL; TÜRKOĞLU, HATİCE OYA; Atmaca, Harika; ATILLA, FATMA GÜL                                                                                                                     | 2015 |
| Overexpression and potential regulatory role of IL-17F in pathogenesis of chronic periodontitis                                                                                         | Luo, Zhenhua; Wang, Hui; Chen, Jiajun; Kang, Jian; Sun, Zheng; Wu, Yafei                                                                                                                    | 2015 |
| The broad-spectrum chemokine inhibitor NR58-3.14.3 suppresses the implantation and survival of human endometrial implants in the nude mice endometriosis model                          | Kayisli, Umit A.; Berkanoglu, Murat; Zhang, Lufang; Kizilay, Gulnur; Arici, Aydin                                                                                                           | 2007 |
| The aetiopathogenesis of capsular contracture: A systematic review of the literature                                                                                                    | Bachour, Yara; Verweij, Stephan P.; Gibbs, Susan; Ket, Johannes CF; Ritt, Marco JPF; Niessen, Frank B.; Mullender, Margriet G.                                                              | 2018 |
| Non-cross-linked porcine-based collagen I–III membranes do not require high vascularization rates for their integration within the implantation bed: A paradigm shift                   | Ghanaati, Shahram                                                                                                                                                                           | 2012 |
| Changes in transforming growth factor- $\beta$ 1 in gingival crevicular fluid following periodontal surgery                                                                             | Kuru, L.; Griffiths, G. S.; Petrie, A.; Olsen, I.                                                                                                                                           | 2004 |
| Role of RANKL in physiological and pathological bone resorption and therapeutics targeting the RANKL–RANK signaling system                                                              | Tanaka, Sakae; Nakamura, Kozo; Takahasi, Naoyuki; Suda, Tatsuo                                                                                                                              | 2005 |
| Association of common variants in MMPs with periodontitis risk                                                                                                                          | Li, Wenyang; Zhu, Ying; Singh, Pradeep; Ajmera, Deepal Haresh; Song, Jinlin; Ji, Ping                                                                                                       | 2016 |
| Selective cyclooxygenase-2 inhibitors                                                                                                                                                   | Golden, Brian D.; Abramson, Steven B.                                                                                                                                                       | 1999 |
| Roles of microRNAs in mammalian reproduction: from the commitment of germ cells to peri-implantation embryos                                                                            | Reza, Abu Musa Md Talimur; Choi, Yun-Jung; Han, Sung Gu; Song, Hyuk; Park, Chankyu; Hong, Kwonho; Kim, Jin-Hoi                                                                              | 2019 |
| Epithelial–mesenchymal transition in development and cancer: role of phosphatidylinositol 3' kinase/AKT pathways                                                                        | Larue, Lionel; Bellacosa, Alfonso                                                                                                                                                           | 2005 |
| Can genetic factors compromise the success of dental implants? A systematic review and meta-analysis                                                                                    | Junior, Joel Ferreira Santiago; Bigueti, Claudia Cristina; Matsumoto, Mariza Akemi; Kudo, Guilherme Abu Halawa; da Silva, Raquel Barroso Parra; Saraiva, Patricia Pinto; Fakhouri, Walid D. | 2018 |
| Interleukin-2 and interleukin-6 gene promoter polymorphisms, and early failure of dental implants                                                                                       | Campos, Maria Isabela Guimarães; dos Santos, Maria Cristina Leme Godoy; Trevilatto, Paula Cristina; Scarel-Caminaga, Raquel Mantuaneli; Bezerra, Fabio Jose; Line, Sergio Roberto Peres     | 2005 |
| Salivary matrix metalloproteinase (MMP-8) levels and gelatinase (MMP-9) activities in patients with type 2 diabetes mellitus                                                            | Collin, Hanna-Leena; Sorsa, Timo; Meurman, Jukka H.; Niskanen, Leo; Salo, Tuula; Rönkä, Hanne; Kontinen, Yrjö T.; Koivisto, Anna-Maija; Uusitupa, Matti                                     | 2000 |
| Inflammation-accelerated senescence and the cardiovascular system: mechanisms and perspectives                                                                                          | Del Pinto, Rita; Ferri, Claudio                                                                                                                                                             | 2018 |
| MiR-27a targets DKK2 and SFRP1 to promote reosseointegration in the regenerative treatment of peri-implantitis                                                                          | Wu, Xiaolin; Gu, Qinhua; Chen, Xipeng; Mi, Wenxiang; Wu, Tingting; Huang, Hui                                                                                                               | 2019 |
| Growth factors and cytokines in endometrium, embryonic development, and maternal: embryonic interactions                                                                                | Tazuke, Salli I.; Giudice, Linda C.                                                                                                                                                         | 1996 |
| The role of matrix metalloproteinases in tumor angiogenesis and tumor metastasis                                                                                                        | John, Anitha; Tuszyński, George                                                                                                                                                             | 2001 |
| Endometriosis and implantation                                                                                                                                                          | Kodaman, Pinar H.; Taylor, Hugh S.                                                                                                                                                          | 2004 |
| In vitro inhibition of matrix metalloproteinase activity in tracheal epithelial lining fluid from horses with recurrent airway obstruction                                              | Raulo, Saara M.; Sorsa, Timo; Maisi, Päivi                                                                                                                                                  | 2006 |
| Endothelial nitric oxide synthase promotes neonatal cardiomyocyte proliferation by inhibiting tissue inhibitor of metalloproteinase-3 expression                                        | Hammoud, Lamis; Xiang, Fuli; Lu, Xiangru; Brunner, Friedrich; Leco, Kevin; Feng, Qingping                                                                                                   | 2007 |
| Low-Level Laser Therapy (LLLT) for periodontal pockets: a review                                                                                                                        | Pribac, Valentin; Todea, Carmen; Duma, Virgil-Florin                                                                                                                                        | 2016 |
| BMP-2 promotes oral squamous carcinoma cell invasion by inducing CCL5 release                                                                                                           | Kim, Mi-joo; Kim, Kwang-mahn; Kim, Jin; Kim, Kyoung-nam                                                                                                                                     | 2014 |
| Dental Calculus and Other Contributing Factors                                                                                                                                          | Bathla, Shalu                                                                                                                                                                               | 2011 |
| Periodontics-Restorative Dentistry                                                                                                                                                      | Bathla, Shalu; Nayyar, Seema                                                                                                                                                                | 2011 |
| Airway obstruction correlates with collagenase-2 (MMP-8) expression and activation in bronchial asthma                                                                                  | Prikk, Kaiu; Maisi, Päivi; Pirilä, Emma; Reintam, Mari-Ann; Salo, Tuula; Sorsa, Timo; Sepper, Ruth                                                                                          | 2002 |
| Therapeutic angiogenesis for ischemic heart disease                                                                                                                                     | Helisch, Armin; Ware, J. Anthony                                                                                                                                                            | 2000 |
| Gingival biotype: A key determinant in periodontal treatment                                                                                                                            | Mundeja, Nidhi; Baiju, C. S.; Khashu, Himanshu; Jain, Deept; Gupta, Apoorva                                                                                                                 | 2014 |

|                                                                                                                                                                                          |                                                                                                                                                                               |      |
|------------------------------------------------------------------------------------------------------------------------------------------------------------------------------------------|-------------------------------------------------------------------------------------------------------------------------------------------------------------------------------|------|
| Nonsurgical and surgical treatment of periodontitis: how many options for one disease?                                                                                                   | Graziani, Filippo; Karapetsa, Dimitra; Alonso, Bettina; Herrera, David                                                                                                        | 2017 |
| Growth factor effects on the expression of collagenase and TIMP-1 in periodontal ligament cells                                                                                          | Alvares, O.; Klebe, R.; Grant, G.; Cochran, David L.                                                                                                                          | 1995 |
| Prognosis                                                                                                                                                                                | Bathla, Shalu                                                                                                                                                                 | 2011 |
| Soft and Hard Tissue Lesions with Periodontal Relevance                                                                                                                                  | Bathla, Shalu; Chatterjee, Shailja                                                                                                                                            | 2011 |
| Decreased levels of matrix metalloproteinase-2 in root-canal exudates during root canal treatment                                                                                        | Pattamapun, Kassara; Handagoon, Sira; Sastraruji, Thanapat; Gutmann, James L.; Pavasant, Prasit; Krisanaprakornkit, Suttichai                                                 | 2017 |
| Periodontal complications with age                                                                                                                                                       | Persson, Goesta Rutger                                                                                                                                                        | 2018 |
| Heterocycle-containing bisphosphonates cause apoptosis and inhibit bone resorption by preventing protein prenylation: Evidence from structure-activity relationships in J774 macrophages | Luckman, Steven P.; Coxon, Fraser P.; Ebetino, Frank H.; Russell, R. Graham G.; Rogers, Michael J.                                                                            | 1998 |
| Animal models for periodontal disease                                                                                                                                                    | Oz, Helieh S.; Puleo, David A.                                                                                                                                                | 2011 |
| Dental stem cells: Possibility for generation of a Bio-tooth                                                                                                                             | Hakki, Sema S.; Karaoz, Erdal                                                                                                                                                 | 2016 |
| Serologic and histologic findings in capsule contracture patients with silicone gel implants                                                                                             | Prantl, Lukas                                                                                                                                                                 | 2009 |
| Molecular Scissors: From Biomaterials Implant to Tissue Remodeling                                                                                                                       | Petreus, Tudor; Antoniac, Iulian; Sirbu, Paul; Cotrutz, Carmen Elena                                                                                                          | 2013 |
| Microbiological and SEM-EDS evaluation of titanium surfaces exposed to periodontal gel: in vitro study                                                                                   | Bernardi, Sara; Bianchi, Serena; Tomei, Anna Rita; Continenza, Maria Adelaide; Macchiarelli, Guido                                                                            | 2019 |
| Cardiovascular effects of relaxin: from basic science to clinical therapy                                                                                                                | Du, Xiao-Jun; Bathgate, Ross AD; Samuel, Chrishan S.; Dart, Anthony M.; Summers, Roger J.                                                                                     | 2010 |
| Effect of Systemic Factors Over the Periodontium                                                                                                                                         | Bathla, Shalu                                                                                                                                                                 | 2011 |
| Immunoendocrine aspects of endometrial function and implantation                                                                                                                         | Lea, Richard G.; Sandra, Olivier                                                                                                                                              | 2007 |
| Expression and localization of nodal in bovine oviduct and uterus during different functional stages of oestrus cycle and pregnancy                                                      | Arganaraz, Martin Eduardo; Apichela, Silvana Andrea; Kenngott, Rebecca; Vermeheren, Margarethe; Rodler, Daniela; Palma, Gustavo Adolfo; Miceli, Dora Cristina; Sinowatz, Fred | 2013 |
| Two pathways of progesterone action in the human endometrium: implications for implantation and contraception                                                                            | Lessey, Bruce A.                                                                                                                                                              | 2003 |
| Immunohistochemical evaluation after Sr-enriched biphasic ceramic implantation in rabbits femoral neck: Comparison of seven different bone conditions                                    | Zarins, Janis; Pilmane, Mara; Sidhoma, Elga; Salma, Ilze; Locs, Janis                                                                                                         | 2018 |
| Epidemiology of Gingival and Periodontal Diseases                                                                                                                                        | Bathla, Shalu                                                                                                                                                                 | 2011 |
| Matrix metalloproteinase levels in chronic periapical lesions and inflamed dental pulps                                                                                                  | Andonovska, Biljana; Dimova, Cena; Velickovski, Boris; Panov, Saso                                                                                                            | 2008 |
| Signaling Between Embryo and Endometrium: Normal Implantation                                                                                                                            | Fox, Chelsea; Lessey, Bruce A.                                                                                                                                                | 2018 |
| Invited Reviews-Liver fibrosis, the hepatic stellate cell and tissue inhibitors of metalloproteinases                                                                                    | McCrudden, R.; Iredale, J. P.                                                                                                                                                 | 2000 |
| Drug-releasing sinus stent                                                                                                                                                               | Tijmsa, Edze; Bachert, Claus; Hissong, James; Watelet, Jean-Baptiste                                                                                                          | 2007 |
| RAGE is a multiligand receptor of the immunoglobulin superfamily: implications for homeostasis and chronic disease                                                                       | Bucciarelli, L. G.; Wendt, T.; Rong, L.; Lalla, E.; Hofmann, M. A.; Goova, M. T.; Taguchi, A.; Yan, S. F.; Yan, S. D.; Stern, D. M.                                           | 2002 |
| Treatment with the aromatase inhibitor letrozole significantly reduced the size of ectopic uterine implants.                                                                             | Fang, Z.; Yang, S.; Tamura, M.; Gurates, B.; Bulun, S.                                                                                                                        | 2001 |
| Regulation of osteoclasts by osteoblast lineage cells depends on titanium implant surface properties                                                                                     | Lotz, Ethan M.; Berger, Michael B.; Schwartz, Zvi; Boyan, Barbara D.                                                                                                          | 2018 |
| Periodontics-Prosthodontics                                                                                                                                                              | Bathla, Shalu; Garg, Sushant                                                                                                                                                  | 2011 |
| Expression of interstitial collagenase, 92-kDa gelatinase, and tissue inhibitor of metalloproteinases-1 in granuloma annulare and necrobiosis lipoidica diabetorum                       | Saarialho-Kere, Ulpu K.; Chang, Elise S.; Welgus, Howard G.; Parks, William C.                                                                                                | 1993 |
| Radiographic Diagnostic Aids                                                                                                                                                             | Bathla, Shalu; Aggarwal, Amit                                                                                                                                                 | 2011 |
| Periodontal materials and cell biology for guided tissue and bone regeneration                                                                                                           | Andrei, Mihai; Dinischiotu, Anca; Didilescu, Andreea Cristiana; Ionita, Daniela; Demetrescu, Ioana                                                                            | 2018 |
| Microbiological and Immunological Diagnostic Aids                                                                                                                                        | Bathla, Shalu                                                                                                                                                                 | 2011 |
| Host response tests for diagnosing periodontal diseases                                                                                                                                  | Page, Roy C.                                                                                                                                                                  | 1992 |
| Systemic treatment with resveratrol and/or curcumin reduces the progression of experimental periodontitis in rats                                                                        | Corrêa, M. G.; Pires, P. R.; Ribeiro, F. V.; Pimentel, S. Z.; Casarin, R. C. V.; Cirano, F. R.; Tenenbaum, H. T.; Casati, M. Z.                                               | 2017 |
| Matrix metalloproteinase biology applied to vitreoretinal disorders                                                                                                                      | Sethi, C. S.; Bailey, T. A.; Luthert, P. J.; Chong, N. H. V.                                                                                                                  | 2000 |
| Immunohistochemical localization of leukemia inhibitory factor, interleukins 1 and 6 at the primary implantation site in the rhesus monkey                                               | Sengupta, Jayasree; Dhawan, Latika; Ghosh, D.                                                                                                                                 | 2003 |
| Periodontitis and Periodontal Disease-innovative strategies for reversing the chronic infectious and inflammatory condition by natural products                                          | Lazar, Veronica; Saviuc, Crina-Maria; Carmen Chifiriuc, Mariana                                                                                                               | 2016 |
| Vascular endothelial growth factor and matrix metalloproteinase-2 expedite formation of endometriosis in the early stage ICR mouse model                                                 | Lu, Xiu-E.; Ning, Wei-Xuan; Dong, Min-Yue; Liu, Ai-Xia; Jin, Fan; Huang, He-Feng                                                                                              | 2006 |

|                                                                                                                                                                                                                         |                                                                                                                                                               |      |
|-------------------------------------------------------------------------------------------------------------------------------------------------------------------------------------------------------------------------|---------------------------------------------------------------------------------------------------------------------------------------------------------------|------|
| The role of genetic polymorphisms in periodontitis                                                                                                                                                                      | Yoshie, Hiromasa; Kobayashi, Tetsuo; Tai, Hideaki; Galicia, Johnah C.                                                                                         | 2007 |
| Matrix metalloproteinase inhibitors: present achievements and future prospects                                                                                                                                          | Denis, L. J.; Verweij, Jaap                                                                                                                                   | 1997 |
| The role of fibroblasts and fibroblast-derived factors in periprosthetic osteolysis                                                                                                                                     | Koreny, Tamás; Tunyogi-Csapó, Miklós; Gál, Istvan; Vermes, Csaba; Jacobs, Joshua J.; Glant, Tibor T.                                                          | 2006 |
| Periodontal disease and the oral-systemic connection: "Is it all the RAGE?"                                                                                                                                             | Katz, Joseph; Wallet, Shannon; Cha, Seunghee                                                                                                                  | 2010 |
| Suppression of basic fibroblast growth factor-induced angiogenesis by a specific chymase inhibitor, BCEAB, through the chymase-angiotensin-dependent pathway in hamster sponge granulomas                               | Muramatsu, Michiko; Yamada, Mayumi; Takai, Shinji; Miyazaki, Mizuo                                                                                            | 2002 |
| Methods of use of inhibitors of phosphodiesterases and modulators of nitric oxide, reactive oxygen species, and metalloproteinases in the treatment of peyronie's disease, arteriosclerosis and other fibrotic diseases | Gonzalez-Cadavid, Nestor F.; Rajfer, Jacob                                                                                                                    | 2012 |
| Causes of sterile vitritis in the setting of Boston keratoprosthesis                                                                                                                                                    | Grassi, Christina M.; Chodosh, James                                                                                                                          | 2014 |
| The osteoclast, bone remodelling and treatment of metabolic bone disease                                                                                                                                                | Boyce, Brendan F.; Rosenberg, Elizabeth; de Papp, Anne E.; Duong, Le T.                                                                                       | 2012 |
| Oral treatment options for degenerative joint disease—presence and future                                                                                                                                               | Steinmeyer, Jürgen; Konttinen, Yrjö T.                                                                                                                        | 2006 |
| Alendronate reduced peri-tunnel bone loss and enhanced tendon graft to bone tunnel healing in anterior cruciate ligament reconstruction                                                                                 | Lui, P. P.; Lee, Y. W.; Mok, T. Y.; Cheuk, Y. C.; Chan, K. M.                                                                                                 | 2013 |
| Inducible nitric oxide synthase (iNOS) in gingival tissues of chronic periodontitis with and without diabetes: immunohistochemistry and RT-PCR study                                                                    | Shaker, Olfat; Ghallab, Noha A.; Hamdy, Ebtehal; Sayed, Safinaz                                                                                               | 2013 |
| Molecular assessment of osseointegration in vivo: a review of the current literature.                                                                                                                                   | Thalji, Ghadeer; Cooper, Lyndon F.                                                                                                                            | 2012 |
| Protease inhibitors in health and disease control—Medical and industrial aspects                                                                                                                                        | Blankenvoorde, Michiel FJ; Brand, Henk S.; Henskens, Yvonne MC; Veerman, Enno CI; Amerongen, Arie V. Nieuw                                                    | 2000 |
| Advanced regenerative techniques based on dental pulp stem cells for the treatment of periodontal disease                                                                                                               | Seciu, Ana-Maria; Craciunescu, Oana; Zarnescu, Otilia                                                                                                         | 2018 |
| Systems and methods for intra-oral drug delivery                                                                                                                                                                        | Li, Chunhua; Carlyle, Wenda; Smedt, Philippe; Abolfathi, Amir; Kuo, Eric; Tricca, Robert; Chen, Jennifer; Wu, Benjamin                                        | 2006 |
| Tissue engineering with platelet-rich plasma and stem cells: New frontier in rheumatology?                                                                                                                              | Wei, Nathan                                                                                                                                                   | 2009 |
| Development and characterization of cationic liposomes conjugated with HVJ (Sendai virus): reciprocal effect of cationic lipid for in vitro and in vivo gene transfer                                                   | Saeki, Yoshinaga; Matsumoto, Norinao; Nakano, Yoshiro; Mori, Masato; Awai, Koji; Kaneda, Yasufumi                                                             | 1997 |
| Oral wound healing: an overview                                                                                                                                                                                         | Larjava, Hannu                                                                                                                                                | 2012 |
| Cytokines and bone-related factors in systemically healthy patients with chronic periodontitis and patients with type 2 diabetes and chronic periodontitis                                                              | Ribeiro, Fernanda Vieira; de Mendonça, Adriana Cutrim; Santos, Vanessa Renata; Bastos, Marta Ferreira; Figueiredo, Luciene Cristina; Duarte, Poliana Mendes   | 2011 |
| Cellular response within the periodontal ligament on application of orthodontic forces                                                                                                                                  | Meeran, Nazeer Ahmed                                                                                                                                          | 2013 |
| Acid attack and cathepsin K in bone resorption around total hip replacement prosthesis                                                                                                                                  | Konttinen, Yrjö T.; Takagi, Michiaki; Mandelin, Jami; Lassus, Jan; Salo, Jari; Ainola, Mari; Li, Tian-Fang; Virtanen, Ismo; Liljeström, Mikko; Sakai, Hideaki | 2001 |
| Surgical treatment of Peyronie's disease                                                                                                                                                                                | Kadioglu, Ates; Salabaş, E.                                                                                                                                   | 2017 |
| Osteopontin: a multifunctional molecule regulating chronic inflammation and vascular disease                                                                                                                            | Scatena, Marta; Liaw, Lucy; Giachelli, Cecilia M.                                                                                                             | 2007 |
| Physiopathology of human embryonic implantation: clinical incidences.                                                                                                                                                   | Merviel, Philippe; Lourdell, Emmanuelle; Cabry, Rosalie; Boulard, VÁšronique; Brzakowski, MĀŠłanie; Demailly, Pauline; Copin, Henri; Devaux, Aviva            | 2009 |
| Matrix metalloproteinase knockout studies and the potential use of matrix metalloproteinase inhibitors in the rheumatic diseases                                                                                        | Milner, Jennifer M.; Cawston, Tim E.                                                                                                                          | 2005 |
| Biocompatibility of total joint replacements: a review                                                                                                                                                                  | Goodman, Stuart B.; Gómez Barrena, Enrique; Takagi, Michiaki; Konttinen, Yrjö T.                                                                              | 2009 |
| Interferons and progesterone for establishment and maintenance of pregnancy: interactions among novel cell signaling pathways                                                                                           | Bazer, Fuller W.; Burghardt, Robert C.; Johnson, Greg A.; Spencer, Thomas E.; Wu, Guoyao                                                                      | 2008 |
| The Pericyte: A Forgotten Cell Type with Important Implications for Alzheimer's Disease?                                                                                                                                | Winkler, Ethan A.; Sagare, Abhay P.; Zlokovic, Berislav V.                                                                                                    | 2014 |
| Host-derived diagnostic markers related to soft tissue destruction and bone degradation in periodontitis                                                                                                                | Buduneli, Nurcan; Kinane, Denis F.                                                                                                                            | 2011 |
| Relaxin's induction of metalloproteinases is associated with the loss of collagen and glycosaminoglycans in synovial joint fibrocartilaginous explants                                                                  | Naqvi, Tabassum; Duong, Trang T.; Hashem, Gihan; Shiga, Momotoshi; Zhang, Qin; Kapila, Sunil                                                                  | 2004 |
| Gingival crevicular fluid, matrix metalloproteinases, and their bioactive regulators as potential adjunctive chair-side point-of-care biomarkers in orthodontic tooth movement                                          | Ingman, Tuula; Apajalahti, Satu; Rice, David; Sorsa, Timo                                                                                                     | 2012 |
| Enamel matrix derivative, inflammation and soft tissue wound healing                                                                                                                                                    | Miron, R. J.; Dard, M.; Weinreb, M.                                                                                                                           | 2015 |
| Interleukin-1β, clinical parameters and matched cellular-histopathologic changes of biopsied gingival tissue from periodontitis patients                                                                                | Hou, Lein-Tuan; Liu, Cheing-Meei; Liu, Bu-Yuan; Lin, Shih-Jung; Liao, Chia-Shih; Rossomando, Edward F.                                                        | 2003 |
| Bisphosphonates in periodontal treatment: a review                                                                                                                                                                      | Badran, Zahi; Kraehenmann, Michael Alexander; Guicheux, Jérôme; Soueidan, Assem                                                                               | 2009 |

|                                                                                                                                                                                  |                                                                                                                                                                                         |      |
|----------------------------------------------------------------------------------------------------------------------------------------------------------------------------------|-----------------------------------------------------------------------------------------------------------------------------------------------------------------------------------------|------|
| A mAb to the $\beta$ 2-leukocyte integrin Mac-1 (CD11b/CD18) reduces intimal thickening after angioplasty or stent implantation in rabbits                                       | Rogers, Campbell; Edelman, Elazer R.; Simon, Daniel I.                                                                                                                                  | 1998 |
| Cytokines: important for implantation?                                                                                                                                           | Chaouat, Gérard; Dubanchet, Sylvie; Ledée, Nathalie                                                                                                                                     | 2007 |
| Does Peri-Implant Mucosa Have a Prognostic Value?                                                                                                                                | Al-Sabbagh, Mohanad; Xenoudi, Pinelopi; Al-Shaikhli, Fatimah; Eldomiaty, Walied; Hanafy, Ahmed                                                                                          | 2019 |
| INTERNATIONAL JOURNAL OF CURRENT MEDICAL AND PHARMACEUTICAL RESEARCH                                                                                                             | Chugh, Anshul; Dahiya, Divya; Thukral, Harleen                                                                                                                                          | 2016 |
| UNREVEALED FACTORS OF BACTERIAL VIRULENCE IN PERIODONTITIS AND PERI-IMPLANTITIS-GINGIPAINS                                                                                       | AR, Trivedi; Patel, V. G.; Gupta, S. A.; Jathal, B. S.; Purani, H. J.                                                                                                                   |      |
| Biomarkers in Peri Mini Screw Implant Crevicular Fluid in Orthodontics-A Review                                                                                                  | Kumar, Sunil; Saba, Iram; Bano, Nouf; Mathew, Silju                                                                                                                                     |      |
| Matrix metalloproteinases and inhibitors in dentistry                                                                                                                            | Boelen, Gerd-Jan; Boute, Lucas; d'Hoop, Joëy; EzEldeen, Mostafa; Lambrechts, Ivo; Opdenakker, Ghislain                                                                                  | 2019 |
| Materials and methods for diagnosis of peri-implant bone and joint infections using prophenoloxidase pathway                                                                     | Parvizi, Javad; Alijanipour, Pouya                                                                                                                                                      | 2017 |
| Altered gene expression in gingival tissues of the ligature-induced periodontitis rat model                                                                                      | Kang, Sang Wook; Ban, JuYeon; Kim, Joong-Hyun; Lee, Chong Heon                                                                                                                          | 2015 |
| Use of IL-1 $\beta$ , IL-6, TNF- $\alpha$ , and MMP-8 biomarkers to distinguish peri-implant diseases: A systematic review and meta-analysis                                     | Ghassib, Iya; Chen, Zhaozhao; Zhu, Juanfang; Wang, Hom-Lay                                                                                                                              | 2019 |
| Metalloproteinase-8 Specific Chair-side Test for Monitoring Periodontal and Peri-implant                                                                                         | KALLIS, GUN-BRITT; CHRISTINALUNDQVIST, DENIS F. KINANE                                                                                                                                  | 1999 |
| Inhibition of matrix metalloproteinases (MMPs)                                                                                                                                   | Teronen, olli; Sorsa, Timo; Salo, Tuula                                                                                                                                                 | 1998 |
| Stem cell therapy for Alzheimer's disease                                                                                                                                        | ME Abdel-Salam, Omar                                                                                                                                                                    | 2011 |
| Regulation of uterine matrix metalloproteinase-9 and the role of microRNAs                                                                                                       | Nothnick, Warren B.                                                                                                                                                                     | 2008 |
| NOTCH inhibition in the treatment and prevention of a metabolic disease or disorder and cardiovascular complications thereof                                                     | Aikawa, Masanori; Fukuda, Daiju; Miyazaki, Tetsuro; Aikawa, Elena                                                                                                                       | 2014 |
| Expression of matrix metalloproteinase-2 in the extracellular matrix of osseointegrated and diseased implants                                                                    | Al-Duboni, Ghada I.                                                                                                                                                                     | 2013 |
| Epidermal growth factor and basic fibroblast growth factor increase the production of matrix metalloproteinases during in vitro decidualization of rat endometrial stromal cells | Nuttall, Robert K.; Kennedy, Thomas G.                                                                                                                                                  | 2000 |
| Clinical implications of disturbances of uterine vascular morphology and function                                                                                                | Hickey, Martha; Fraser, Ian S.                                                                                                                                                          | 2000 |
| Porphyromonas gingivalis proteinases as virulence determinants in progression of periodontal diseases                                                                            | Kadowaki, Tomoko; Nakayama, Koji; Okamoto, Kuniaki; Abe, Naoko; Baba, Atsuyo; Shi, Yixin; Ratnayake, Dinath B.; Yamamoto, Kenji                                                         | 2000 |
| Salivary proteomic biomarkers in the diagnosis of periodontal diseases                                                                                                           | Kumar, TP Padma; Deepa, M. S.; Kumar, K. Nanda                                                                                                                                          |      |
| Periodontitis and peri-implantitis biomarkers in human oral fluids and the null-allele mouse model                                                                               | Kuula, Heidi                                                                                                                                                                            | 2009 |
| Salivary Diagnostics                                                                                                                                                             | Rathnayake, Nilminie; Giesemann, Dirk-Rolf; Heikkinen, Anna Maria; Tervahartiala, Taina; Sorsa, Timo                                                                                    | 2017 |
| Immunological Markers Detected in Peri-Implant Crevicular Fluid Detected by MSD Electromagnetic ELISA Assay-A Pilot Study of Dental Implant Patients                             | Canallatos, Paul                                                                                                                                                                        | 2017 |
| Comparative microarray analyses of inflamed human periimplant and periodontal tissues in vivo                                                                                    | vom Orde, F.; Rödiger, M.; Gersdorff, N.                                                                                                                                                |      |
| Triclosan-containing fluoride toothpaste on clinical parameters and osteo-inflammatory mediators when applied in a stent during experimental peri-implant mucositis in smokers   | Peres Pimentel, Suzana; Vieira Ribeiro, Fernanda; Correa Casarin, Renato; Ribeiro Cirano, Fabiano; Haguihara Luchesi, Vanessa; Gallego Arias Pecorari, Vanessa; Zaffalon Casati, Marcio | 2019 |
| Establishment of perpendicular protrusion of type I collagen on TiO <sub>2</sub> nanotube surface as a priming site of peri-implant connective fibers                            | Nojiri, Toshiki; Chen, Chia-Yu; Kim, David M.; Da Silva, John; Lee, Cliff; Maeno, Masahiko; McClelland, Arthur A.; Tse, Bryan; Ishikawa-Nagai, Shigemi; Hatakeyama, Wataru              | 2019 |
| A New Controlled-Release Material Containing Metronidazole and Doxycycline for the Treatment of Periodontal and Peri-Implant Diseases: Formulation and In Vitro Testing          | Nastri, Livia; De Rosa, Alfredo; De Gregorio, Vincenzo; Grassia, Vincenzo; Donnarumma, Giovanna                                                                                         | 2019 |
| EG-VEGF: a key endocrine factor in placental development                                                                                                                         | Brouillet, Sophie; Hoffmann, Pascale; Feige, Jean-Jacques; Alfaidy, Nadia                                                                                                               | 2012 |
| Dynamics of Markers of Bone Resorption in Oral Fluid in Patients with Generalized Parodontitis During its Treatment                                                              | Lukash, A. Yu; Fastovets, O. O.; Pavlov, S. V.                                                                                                                                          | 2019 |
| Site-specific Characteristics of Peri-implant Wound                                                                                                                              | Lee, Connie                                                                                                                                                                             | 2012 |
| Correlation between interleukin-1 $\beta$ , interleukin-6 and tumor necrosis factor- $\alpha$ and clinical parameters in chronic and aggressive periodontal disease              | Vahabi, Surena; Sattari, Mandana; Taheraslani, Marjan; Akbarzadeh Bagheban, Alireza                                                                                                     | 2012 |
| HOST RESPONSES IN PERI IMPLANT TISSUE IN COMPARISON TO PERIODONTAL TISSUE                                                                                                        | Madarasmi, Raviporn                                                                                                                                                                     | 2017 |
| Peri-implantitis                                                                                                                                                                 | Iocca, Oreste; Bianco, Giuseppe                                                                                                                                                         | 2016 |
| Study on matrix metalloproteinase-2, 9 in peri-implant sulcular fluid                                                                                                            | Wei, Mingxia; Yu, Na; Zhang, Jinghui                                                                                                                                                    | 2017 |
| Genetic Risk Factors for the Development of Periimplantitis                                                                                                                      | Fourmoussis, Ioannis; Vlachos, Manolis                                                                                                                                                  | 2019 |
| Adverse host tissue responses in loosening of dental implants: Proteolytic enzymes and peri-implant tissue destruction                                                           | Ma, Jian                                                                                                                                                                                | 2004 |

|                                                                                                                                                                                                                                                                                                                                             |                                                                                                                         |      |
|---------------------------------------------------------------------------------------------------------------------------------------------------------------------------------------------------------------------------------------------------------------------------------------------------------------------------------------------|-------------------------------------------------------------------------------------------------------------------------|------|
| Healing of Peri-implant Soft Tissue around Platform-Switching and Platform-Matching Single Implants                                                                                                                                                                                                                                         | Cheng, Guo-Liang                                                                                                        | 2017 |
| Meeting report: The 12th European oral microbiology workshop (EOMW) in Stockholm, Sweden                                                                                                                                                                                                                                                    | Belibasakis, Georgios N.; Curtis, Michael A.; Hajishengallis, George; Zaura, Egija                                      | 2018 |
| An Introduction to Understanding the Basics of Teeth vs. Dental Implants: Similarities and Differences                                                                                                                                                                                                                                      | Kelekis-Cholakakis, Anastasia; Atout, Reem; Hamdan, Nader; Tsourounakis, Ioannis                                        | 2018 |
| Systemic administration of azithromycin as an adjunct to non-surgical periodontal therapy in stage III and IV periodontitis-a randomized controlled trial. Title for lay persons: Benefits of systemically administered azithromycin in treating gum disease. INVESTIGATORS: Saso Ivanovski (SI), Valerie Woodford, Roderick Marshall, Tino | Mercado, Ryan Lee RL                                                                                                    |      |
| The Analysis of Matrix Metalloproteinase-8 in Gingival Crevicular Fluid and Periodontal Diseases                                                                                                                                                                                                                                            | Nila, Kasuma                                                                                                            |      |
| Method for determination of the status of a disease                                                                                                                                                                                                                                                                                         | Hall, Jan                                                                                                               | 2016 |
| Topic: aMMP-8 Oral Fluid PoC Test                                                                                                                                                                                                                                                                                                           | Nwhator, Solomon O.; Heikkinen, Anna-Maria; Tervahartiala, Taina; Gieselmann, Dirk-Rolf; Leppilahti, Jussi; Sorsa, Timo | 2018 |
| A doxycycline-treated hydroxyapatite implant surface attenuates the progression of peri-implantitis: A radiographic and histological study in mice                                                                                                                                                                                          | Ding, Lin; Zhang, Peng; Wang, Xin; Kasugai, Shohei                                                                      | 2019 |
| DIAGNOSTIC ENZYMES IN PERIODONTAL                                                                                                                                                                                                                                                                                                           | Gattani, Deepti; Shewale, Akhilesh; Dubey, Sakshi; Deotale, Snehal                                                      | 2015 |
| SMOKING AND ITS EFFECTS ON THE PERIODONTAL AND PERI-IMPLANT TISSUES                                                                                                                                                                                                                                                                         | César-Neto, João B.; Casati, Márcio Z.                                                                                  | 2007 |
| Drug target for preventing and treating periodontal disease, improving healing of periodontal wounds and promoting oral health                                                                                                                                                                                                              | Ny, Tor; Li, Jinan; Guo, Yongzhi; Lindh, Tomas                                                                          | 2016 |
| Dental Implant Maintenance                                                                                                                                                                                                                                                                                                                  | Nowzari, Hessam; Jorgensen, Michael                                                                                     | 2013 |
| Peri-prosthetic interface tissue around aseptic loosened prostheses: not waste, but a potential therapeutic target?                                                                                                                                                                                                                         | Schoeman, A. E.                                                                                                         | 2017 |
| Method for measuring bone loss rate                                                                                                                                                                                                                                                                                                         | Hall, Jan                                                                                                               | 2018 |
| Drug target for preventing and treating periodontal disease, improving healing of periodontal wounds and promoting oral health                                                                                                                                                                                                              | Ny, Tor; Li, Jinan; Guo, Yongzhi; Lindh, Tomas                                                                          | 2018 |
| Influence of Nicotine in Osseointegration of Dental Implants                                                                                                                                                                                                                                                                                | Santos, Hélder                                                                                                          |      |
| Differential expressions of biomarkers in gingival crevicular fluid of Han and Uygur populations with peri-implantitis                                                                                                                                                                                                                      | Gao, Xiaowei; Zhou, Jing; Sun, Yue; Wang, Lin; Zhou, Yanmin                                                             | 2018 |
| Clodronate inhibits MMP-1 and MMP-8 in GCF and PISF.                                                                                                                                                                                                                                                                                        | Konttinen, Y. T.; Salo, T.; Ingman, T.; Sorsa, T.; Teronen, O.                                                          | 1995 |
| C-TELOPEPTIDE AS DIAGNOSTIC MARKER FOR ACTIVE PERIODONTAL DESTRUCTION-A REVIEW                                                                                                                                                                                                                                                              | GANESH, PR                                                                                                              |      |
| Saliva-A Tool for Diagnosis in Periodontal Disease                                                                                                                                                                                                                                                                                          | Abiramidevi, M.; Nagappan, Visalakshi; Prasad, P. Arun Kumar                                                            | 2019 |
| Dental Implants in the Medically Compromised Patient Population                                                                                                                                                                                                                                                                             | Akay, Ayşe Sümeyye; Arisan, Volkan                                                                                      | 2017 |
| Gene expression in blastocysts and the endometrium during porcine peri-implantation development                                                                                                                                                                                                                                             | Jiang, Linghuo                                                                                                          | 1999 |
| Epigenetic potential of histone deacetylase inhibitors in treating fibroproliferative diseases and preventing peri-implantation fibrosis                                                                                                                                                                                                    | ZHIBO, WANG                                                                                                             | 2009 |
| Clinical Evaluation of Biochemical Marker and Mineral Nutritional Factor in Mandibular Implant Over-Denture Cases                                                                                                                                                                                                                           | Alkhiary, Yaser M.                                                                                                      | 2012 |
| Recent Advances in Salivary Proteomics, Genomics and Transcriptomics: A Reliable Tool in Periodontal diagnosis—A Review                                                                                                                                                                                                                     | Rajapriya, P.; Saravanan, P.; Burnice, N. K.; Priyanka, K. C.; Shalini, S.; Ramakrishnan, R.                            | 2014 |
| Gingival Health                                                                                                                                                                                                                                                                                                                             | Ciancio, Sebastian                                                                                                      |      |
| Expression of $\beta$ -catenin and MMP-8 in gingival crevicular fluid and gingival tissue indicates the disease severity of patients with chronic periodontitis                                                                                                                                                                             | Zhu, Lilei; Yao, Yao; Liu, Jian; Wang, Jingyu; Xie, Hui                                                                 | 2019 |
| A Study of Doxycycline Release from pH-Responsive Chitosan-PLGA Coated Titanium Nanotubes                                                                                                                                                                                                                                                   | Dube, Vikram                                                                                                            | 2018 |
| Osteoclast-associated intracellular ITAM signalling molecules in human peri-implant osteolysis and rheumatoid arthritis.                                                                                                                                                                                                                    | Alias, Ekram                                                                                                            | 2014 |
| Smoking and Periodontal Health                                                                                                                                                                                                                                                                                                              | Keşir, S. Selva Süme; Olgun, H. Ebru                                                                                    | 2018 |
| Decontamination of titanium surfaces with air polishing and glycine powder                                                                                                                                                                                                                                                                  | Datar, Joseph Nikki Abrogar                                                                                             | 2016 |
| Methods to prevent or treat periodontitis or peri-implantitis                                                                                                                                                                                                                                                                               | Hong, Liu; Amendt, Brad A.; Salem, Aliasger K.; Elangovan, Satheesh; Ortiz, Gustavo Avila; Sharp, Thad                  | 2019 |
| in Different Categories of Pern-implant Vertical Bone Loss                                                                                                                                                                                                                                                                                  | Salo, C.; Konttinen, Y. T.                                                                                              |      |
| Influence of single nucleotide polymorphisms (SNPs) in genetic susceptibility towards periprosthetic osteolysis                                                                                                                                                                                                                             | Jagga, Supriya; Sharma, Ashish Ranjan; Bhattacharya, Manojit; Chakraborty, Chiranjib; Lee, Sang-Soo                     | 2019 |
| REVERSAL OF PHENOTYPE AND PLASTICITY OF MYOFIBROBLASTS TO TARGET PERI-IMPLANTATION FIBROSIS                                                                                                                                                                                                                                                 | Ariel, TAN Bing-Shi                                                                                                     | 2012 |
| Host-bacterial interaction in peri-implantitis                                                                                                                                                                                                                                                                                              | Irshad, Muhammad                                                                                                        | 2013 |
| Crevicular Fluid Content during Wound Healing Comparison between Tooth and Implant                                                                                                                                                                                                                                                          | Emecen Huja, Pinar                                                                                                      | 2011 |



|                                                                                                                                                            |                                                                                                                                                                                                |      |
|------------------------------------------------------------------------------------------------------------------------------------------------------------|------------------------------------------------------------------------------------------------------------------------------------------------------------------------------------------------|------|
| Local administration of Tiludronic Acid downregulates important mediators involved in periodontal tissue destruction in experimental periodontitis in rats | Furlaneto, Flávia AC; Nunes, Nara LT; Souza, Ricardo B.; Yamamoto, Kely O.; Oliveira Filho, Ivan Lima; Frota, Nicolly PR; Chaves, Heliada; Lisboa, Mario; Taba Jr, Mario; Ervolino, Edilson    | 2018 |
| MMPs en la Patogenia de la Periodontitis Apical Crónica: ¿Destrucción o Protección de los Tejidos Periapicales?                                            | Hernández, R. M.; Saldaña, G. M.; Dezerega, P. A.                                                                                                                                              | 2009 |
| Relationship between TNF- $\alpha$ , MMP-8, and MMP-9 levels in gingival crevicular fluid and the subgingival microbiota in periodontal disease            | Romero-Castro, Norma Samanta; Vázquez-Villamar, Mirna; Muñoz-Valle, José Francisco; Reyes-Fernández, Salvador; Serna-Radilla, Victor Othón; García-Arellano, Samuel; Castro-Alarcón, Natividad | 2019 |
| Targeting NF- $\kappa$ B and NFATc1 signalling to inhibit bone resorption in peri-prosthetic osteolysis.                                                   | Zawawi, Muhamad Syahrul Fitri                                                                                                                                                                  | 2015 |
| Expresión de Formas Solubles de MMP-14 y CXCL12 en Periodontitis Crónica Progresiva                                                                        | Hernández, M.; Tervahartiala, T.; Rivera, O.; Dezerega, A.; Dutzan, N.; Henríquez, L.; Sorsa, T.                                                                                               | 2009 |
| Supportive Periodontal Therapy (Maintenance Phase)                                                                                                         | Bathla, Shalu                                                                                                                                                                                  | 2011 |
| Soft Tissue Healing around Platform Matched and Switched Dental Implants                                                                                   | Meng, Hsiu-Wan                                                                                                                                                                                 | 2013 |
| Etiology and Pathogenesis of Periodontal Disease                                                                                                           | Inagaki, Koji; Kobayashi, Junya; Kawamura, Makoto; Ohara, Masaru; Okada, Mitsugi; Taguchi, Akira; Tanaka, Masashi; Wright, FA Clive                                                            |      |
| 10 Biomaterials and Immune                                                                                                                                 | Prakasam, Sivaraman; Gajendrareddy, Praveen; Louie, Christopher; Lee, Clarence; Bertassoni, Luiz E.                                                                                            |      |
| Clearance effect of sandblasting and hand scaling on subgingival plaque and their effect on interleukin 1/6/8/10 and MMP8/TIMP1 levels                     | Li, Lei                                                                                                                                                                                        | 2016 |
| Bone resorption, matrix metalloproteinases and caffeic acid phenethyl ester                                                                                | Akyol, Sumeyya; Kursunlu, S. Fatih; Akyol, Omer                                                                                                                                                | 2016 |
| Salivary Diagnostics-A paradigm shift in periodontics                                                                                                      | Pani Shankar, K. H.; Prakash, P. S. G.; Anusha, K.                                                                                                                                             |      |
| PERIODONTAL DISEASES-NOVEL THERAPEUTICS Regenerative treatment                                                                                             | Tenenbaum, Howard C.                                                                                                                                                                           |      |
| Silk Fiber Films for the Slow and Continuous Release of Tetracycline and Doxycycline                                                                       | Foroutanjazi, Sadaf                                                                                                                                                                            | 2018 |
| The role of biomaterial properties in peri-implant neovascularization                                                                                      | Raines, Andrew Lawrence                                                                                                                                                                        | 2011 |
| Particulate Material                                                                                                                                       | MATTER, EFFECTS OF PARTICULATE                                                                                                                                                                 | 1998 |
| Decontamination of rough implant surfaces in vitro using glycine powder air polishing                                                                      | Leung, Kyla Elizabeth Karr Yee                                                                                                                                                                 | 2018 |
| Genetic Background of Implant Failure                                                                                                                      | Nishimura, Ichiro                                                                                                                                                                              | 2013 |
| Pectin nanocoating reduces proinflammatory fibroblast response to bacteria                                                                                 | Mieszkowska, A.; Folkert, J.; Gaber, T.; Miksch, K.; Gurzawska, K.                                                                                                                             | 2017 |
| Techniques of Soft Tissue Grafting in Implant Dentistry                                                                                                    | El Chaar, Edgard; Oshman, Sarah                                                                                                                                                                | 2016 |
| Inhibition of cathepsin K activity and the treatment and prevention of disease                                                                             | Cullis-Hill, David; Hannon, Robert Logan; Little, Christopher Bond; Smith, Margaret Mary                                                                                                       | 2012 |
| Pathogenesis and Host Response                                                                                                                             | Bathla, Shalu                                                                                                                                                                                  | 2017 |
| 치관, 치근 상아질에서 우식의 진행에 따른 Matrix Metalloproteinase-8 과 13 의서로 다른 발현 양상에 관한 연구                                                                                | 이태연                                                                                                                                                                                            | 2016 |
| Do genetic polymorphisms affect susceptibility to periodontal disease? A literature review                                                                 | Toy, V. E.; Uslu, M. O.                                                                                                                                                                        | 2019 |
| Genetic variants in periodontal diseases: Impact on disease susceptibility and severity                                                                    | Singh, Man Mohan; Mathur, Rajat; Bedi, Ravinder Singh                                                                                                                                          |      |
| Periodontal Pocket                                                                                                                                         | Bathla, Shalu                                                                                                                                                                                  | 2011 |
| The Effects of Scaling and Root Planing on Mrna Expression of Matrix Metalloproteinase-1 and Clinical Parameters                                           | Patricia, Melissa; Lessang, Robert; Tadjoedin, Fatimah Maria; Bachtar, Boy M.                                                                                                                  |      |
| Quantification of TNF- $\alpha$ in Patients with Periodontitis and Type 2 Diabetes                                                                         | Martínez-Aguilar, Víctor M.; Carrillo-Ávila, Bertha A.; Sauri-Esquivel, Eduardo A.; Guzmán-Marín, Eugenia; Jiménez-Coello, Matilde; Escobar-García, Diana María; Pozos-Guillén, Amaury         | 2019 |
| Matrix Metalloproteinases and Endometriosis: Their Role in Disease Pathophysiology and Potential as Therapeutic Targets                                    | Alali, Zahraa; Swan, Kimberly; Nothnick, Warren B.                                                                                                                                             | 2018 |
| Splinting                                                                                                                                                  | Bathla, Shalu; Grover, Harpreet Singh                                                                                                                                                          | 2011 |
| Periodontic-Endodontics                                                                                                                                    | Bathla, Shalu; Nayyar, Seema                                                                                                                                                                   | 2011 |
| Decontamination methods to restore the biocompatibility of contaminated titanium surfaces                                                                  | Jin, Seong-Ho; Lee, Eun-Mi; Park, Jun-Beom; Kim, Kack-Kyun; Ko, Youngkyung                                                                                                                     | 2019 |
| Efficacy of Proanthocyanidins from Pelargonium sidoides Root Extract in Reducing P. gingivalis Viability While Preserving Oral Commensal S. salivarius     | Savickiene, Nijole; Jekabsone, Aiste; Raudone, Lina; Abdelgelil, Asmaa; Cochis, Andrea; Rimondini, Lia; Makarova, Elina; Grinberga, Solveiga; Pugovics, Osvalds; Dambrova, Maija               | 2018 |
| Device for the diagnosis of inflammatory tissues in dental applications                                                                                    | Schnabelrauch, Matthias; Meinel, Lorenz; Schlottig, Falko; Wyrwa, Ralf                                                                                                                         | 2017 |
| Peri-Implant Complications                                                                                                                                 | Kelekis-Cholakakis, Anastasia; Atout, Reem; Hamdan, Nader; Tsourounakis, Ioannis John                                                                                                          |      |
| Genetic Variability and Periodontal Disease                                                                                                                | Dumitrescu, Alexandrina L.; Kobayashi, Junya                                                                                                                                                   | 2010 |

|                                                                                                                                                                                        |                                                                                                                                                                         |      |
|----------------------------------------------------------------------------------------------------------------------------------------------------------------------------------------|-------------------------------------------------------------------------------------------------------------------------------------------------------------------------|------|
| Smoking and periodontal microorganisms                                                                                                                                                 | Hanioka, Takashi; Morita, Manabu; Yamamoto, Tatsuo; Inagaki, Koji; Wang, Pao-Li; Ito, Hiroshi; Morozumi, Toshiya; Takeshita, Toru; Suzuki, Nao; Shigeishi, Hideo        | 2019 |
| Implants-Basic Concepts                                                                                                                                                                | Bathla, Shalu; Durrani, Farhan                                                                                                                                          | 2017 |
| Critical issues in periodontal research Manish Kumar <sup>1</sup> , Vandana A. Pant <sup>2</sup> , Vivek Govila <sup>3</sup> , Mona Sharma <sup>4</sup><br>بندی‌وشگاه بر اساس دست‌مخ‌ر | Kumar, Manish; Pant, Vandana A.; Govila, Vivek; Sharma, Mona<br>Blackwell, Wiley                                                                                        |      |
| Effects of Glycemic Control on Soft Tissue Wound Healing around Dental Implants for Patients with Type 2 Diabetes                                                                      | Hurwitz, Morgan Barker                                                                                                                                                  | 2019 |
| Osseous Remodeling Around Dental Implants                                                                                                                                              | Flanagan, Dennis                                                                                                                                                        | 2019 |
| Dysbiosis of the oral commensal microbiota drives inflammatory periodontal disease in the mouse model.                                                                                 | Payne, Mark                                                                                                                                                             | 2013 |
| Nonsurgical Periodontal Therapy: a Review of Current Standards of Care and Innovations to Improve Gingival and Periodontal Health                                                      | Geisinger, Maria L.; Kaur, Maninder; Basma, Hussein                                                                                                                     | 2019 |
| Differential Gene Expression of Matrix Metalloproteinase-3 and-13 during Mineralization of MC3T3-E1 Cells Cultured on Titanium Implant Material                                        | Goto, Yousuke; Matsuura, Takashi; Daigo, Yuki; Sato, Hironobu                                                                                                           | 2005 |
| Tissue-engineered models of oral soft tissue diseases                                                                                                                                  | Moharamzadeh, Keyvan; Colley, Helen; Hearnden, Vanessa; Murdoch, Craig                                                                                                  | 2017 |
| Role of Inflammatory Factors in Regulation of Osteogenesis in Tissue-Engineered Bone                                                                                                   | Mu, Yandong; Yang, Lu; Li, Chenglong; Qing, Wei                                                                                                                         | 2018 |
| Long-term studies on the integration of acellular porcine dermis as an implant shell and the effect on capsular fibrosis around silicone implants in a rat model                       | Ludolph, I.; Gruener, J. S.; Kengelbach-Weigand, A.; Fiessler, C.; Horch, R. E.; Schmitz, M.                                                                            | 2019 |
| Risk factors for dental implant failure: Smoking, periodontal disease and previously failed implant sites                                                                              | Wanat III, Thomas Nelson                                                                                                                                                | 2016 |
| Peri-Implant Complications: A Clinical Guide to Diagnosis and Treatment                                                                                                                | Kelekis-Cholakias, Anastasia; Atout, Reem; Hamdan, Nader; Tsourounakis, Ioannis                                                                                         | 2018 |
| Components of Host Response to Pathogenic Bacteria in Gingivitis                                                                                                                       | Gamonal, Jorge; Silva, Nora; Hernández, Marcela; Dutzan, Nicolás; García-Sesnich, Jocelyn; Abusleme, Loreto; Dezerega, Andrea; Vernal, Rolando                          | 2011 |
| Use of probiotics in dentistry                                                                                                                                                         | Gomez, Pablo Alejandro Millones                                                                                                                                         | 2017 |
| Serum IL-10 is a predictive marker of poor endometrial receptivity in women with idiopathic recurrent spontaneous miscarriage                                                          | Ganesh, A.; Banerjee, P.; Chakravarty, B.; Chaudhury, K.                                                                                                                | 2013 |
| Bone Defects                                                                                                                                                                           | Bathla, Shalu; Salaria, S. K.                                                                                                                                           | 2011 |
| Role of MAP kinase on MMP-13 expression in rat periodontal ligament cells<br>CD44, 760                                                                                                 | Chung, Chan Gil; Cui, De-Zhe; Chung, Hyun-Ju; Kim, Young-Joon<br>Annexin, V.                                                                                            | 2006 |
| Gingival Inflammation                                                                                                                                                                  | Bathla, Shalu; Salaria, S. K.                                                                                                                                           | 2011 |
| Autophagy Involvement in Aseptic Loosening of Arthroplasty Components                                                                                                                  | Camuzard, Olivier; Breuil, Véronique; Carle, Georges F.; Pierrefite-Carle, Valérie                                                                                      | 2019 |
| Peri-Operative Oral Treatment with Celecoxib Prevents Peritoneal Carcinomatosis in a Rat Model                                                                                         | ten Raaij, S.; Oosterling, S. J.; van der Bijl, G. J.; van der Wal, H. C.; Halm, J.; Beelen, R. H. J.; Meijer, S.; van Egmond, M.; Jeekel, J.                           | 2007 |
| Recent advances in periodontology                                                                                                                                                      | Aurer, Andrej                                                                                                                                                           | 2012 |
| Matrix metalloproteinases in oral diseases (with accent on matrix metalloproteinase-1 in chronic periapical lesions)                                                                   | Evrosimovska, Biljana; Dimova, Cena                                                                                                                                     | 2017 |
| Obesity and Peri-implantation Endometrium                                                                                                                                              | Bhandari, Harish; Quenby, Siobhan M.                                                                                                                                    | 2014 |
| Supportive Periodontal Therapy                                                                                                                                                         | Kumathalli, Kanteshwari I.                                                                                                                                              | 2017 |
| Trophoblast Implantation Versus Tumor Invasion                                                                                                                                         | Fouk, Russell; Genbacev, Olga                                                                                                                                           | 2001 |
| Addressing the Inflammatory Response in Periodontal and Related Systemic Disease                                                                                                       | Donley, Timothy; Jo-Anne Jones, R. D. H.; Golub, Lorne M.; Gu, Ying; Ryan, Maria Emanuel                                                                                |      |
| Early dental implant failure: A review of the literature                                                                                                                               | dos Santos, Maria Cristina Leme Godoy; Campos, Maria Isabela Guimarães; Line, Sergio Roberto Peres                                                                      | 2002 |
| Periodontal Tissue Engineering Around Dental Implants                                                                                                                                  | Moussa, Rania M.; Yassin, Hala H.; Saad, Manal M.; Nagy, Naglaa B.; Marei, Mona K.                                                                                      | 2015 |
| 33 Oral Inflammation and Periodontitis                                                                                                                                                 | Kantarci, Alpdogan; Hasturk, Hatice; Van Dyke, Thomas E.                                                                                                                | 2010 |
| Nakazato G, Tsuchiya H, Sato M, Yamauchi M. In vivo plaque formation on implant materials. Int J Oral Maxillofac Implants 1989; 4: 321-326.                                            | Nelson, S. K.; Knoernschild, K. L.; Robinson, F. G.; Schuster, G. S.; Toledo, R. C.; Machado, M. A. N.; Stefani, C. M.; Line, S. R. P.; Gonçalves, R. B.; Ong, E. S. M. | 2003 |
| Periodontal Disease and Diabetes Mellitus: A Two-Way Road to Health                                                                                                                    | Kripal, Krishna                                                                                                                                                         | 2017 |
| Peri-ovulatory tissue reorganization in the human ovary                                                                                                                                | Polec, Anna                                                                                                                                                             | 2011 |
| Cytokine levels, microbiology, and virology in healthy implants and teeth                                                                                                              | Phamduong, Sharon                                                                                                                                                       | 2009 |
| Biological Role of Matrix Metalloproteinases and the Endogenous Inhibitor Proteins in the Periprosthetic Connective Tissue Remodeling Around Loose Artificial Hip Joints               | Takagi, Michiaki; Santavirta, Seppo; Ida, Hideo; Ishii, Masaji; Takei, Iaso; Ogino, Toshihiko; Kontinen, Yrjö T.                                                        | 1999 |

|                                                                                                                                                                                                       |                                                                                                                                                                                                |      |
|-------------------------------------------------------------------------------------------------------------------------------------------------------------------------------------------------------|------------------------------------------------------------------------------------------------------------------------------------------------------------------------------------------------|------|
| Clinical Relevance of the Advanced Microbiologic and Biochemical Investigations in Periodontal Diagnosis: A Critical Analysis                                                                         | Grover, Vishakha; Kapoor, Anoop; Malhotra, Ranjan; Kaur, Gagandeep                                                                                                                             | 2014 |
| Epigenetics and its role on implant therapy: a review                                                                                                                                                 | Di Gianfilippo, Riccardo; Di Gianfilippo, Carmine; Prato, GiovanPaolo Pini                                                                                                                     |      |
| AL-AZHAR                                                                                                                                                                                              | Abd-Elrahman, Nora; El-Shall, Ossama; Shaker, Olfat; Shafik, Mai                                                                                                                               |      |
| Implants-Surgical Concepts                                                                                                                                                                            | Bathla, Shalu; Manocha, Anish                                                                                                                                                                  | 2017 |
| Role of Proteases and Their Tissue Inhibitors in Pregnancy Outcome                                                                                                                                    | Roy, Sudhir C.                                                                                                                                                                                 | 2013 |
| CRITICAL BIOMARKERS IN PERIODONTICS.                                                                                                                                                                  | Sachdeva, Shivani; Saluja, Harish; Mani, Ameet; Tandon, Parul; Anuraga, S.                                                                                                                     | 2017 |
| Smoking and Periodontium                                                                                                                                                                              | Bathla, Shalu                                                                                                                                                                                  | 2017 |
| Evaluation of periimplant crevicular fluid prostaglandin e2 and matrix metalloproteinase-8 levels from health to periimplant disease status: A prospective study                                      | Basegmez C.; Yalcin S.; Yalcin F.; Ersanli S.; Mijiritsky E.                                                                                                                                   | 2012 |
| Proinflammatory cytokines in the crevicular fluid of patients with peri-implantitis                                                                                                                   | Javed F.; Al-Hezaimi K.; Salameh Z.; Almas K.; Romanos G.E.                                                                                                                                    | 2011 |
| Microbiology and cytokine levels around healthy dental implants and teeth                                                                                                                             | Nowzari H.; Botero J.E; DeGiacomo M.; Villacres M.C; Rich S.K.                                                                                                                                 | 2008 |
| Levels and molecular forms of MMP-7 (matrilysin-1) and MMP-8 (collagenase-2) in diseased human peri-implant sulcular fluid                                                                            | Kivelä-Rajamäki M.; Maisi P.; Srinivas R.; Tervahartala T.; Teronen O.; Husa V.; Salo T.; Sorsa T.                                                                                             | 2003 |
| Can degradation products released from dental implants affect peri-implant tissues?                                                                                                                   | Noronha Oliveira, M.; Schunemann, W. V. H.; Mathew, M. T.; Henriques, B.; Magini, R. S.; Teughels, W.; Souza, J. C. M.                                                                         | 2018 |
| Composition of human peri-implantitis and periodontitis lesions.                                                                                                                                      | Carcuac, O.; Berglundh, T.                                                                                                                                                                     | 2014 |
| Peri-implant diseases: a review of treatment interventions.                                                                                                                                           | Romanos, Georgios E.; Javed, Fawad; Delgado-Ruiz, Rafael Arcesio; Calvo-Guirado, Jose Luis                                                                                                     | 2015 |
| Role of toll-like receptor 2 in inflammation and alveolar bone loss in experimental peri-implantitis versus periodontitis.                                                                            | Yu, X.; Hu, Y.; Freire, M.; Yu, P.; Kawai, T.; Han, X.                                                                                                                                         | 2018 |
| The effect of orally administered probiotic Lactobacillus reuteri-containing tablets in peri-implant mucositis: a double-blind randomized controlled trial.                                           | Flichy-Fernandez, A. J.; Ata-Ali, J.; Alegre-Domingo, T.; Candel-Martí, E.; Ata-Ali, F.; Palacio, J. R.; Penarrocha-Diago, M.                                                                  | 2015 |
| Analysis of matrix metalloproteinases, especially MMP-8, in gingival crevicular fluid, mouthrinse and saliva for monitoring periodontal diseases.                                                     | Sorsa, Timo; Gursoy, Ulvi K.; Nwhator, Solomon; Hernandez, Marcela; Tervahartala, Taina; Leppilahti, Jussi; Gursoy, Mervi; Kononen, Eija; Emingil, Gulnur; Pussinen, Pirkko J.; Mantyla, Paivi | 2016 |
| Biomarkers and Bacteria Around Implants and Natural Teeth in the Same Individuals.                                                                                                                    | Gurlek, Onder; Gumus, Pinar; Nile, Christopher J.; Lappin, David F.; Buduneli, Nurcan                                                                                                          | 2017 |
| Clinical, Immune, and Microbiome Traits of Gingivitis and Peri-implant Mucositis.                                                                                                                     | Schincaglia, G. P.; Hong, B. Y.; Rosania, A.; Barasz, J.; Thompson, A.; Sobue, T.; Panagakos, F.; Burleson, J. A.; Dongari-Bagtzoglou, A.; Diaz, P. I.                                         | 2017 |
| Prediction of individual implant bone levels and the existence of implant "phenotypes".                                                                                                               | Papantonopoulos, Georgios; Gogos, Christos; Housos, Efthymios; Bountis, Tassos; Loos, Bruno G.                                                                                                 | 2017 |
| Ligature induced peri-implantitis: tissue destruction and inflammatory progression in a murine model.                                                                                                 | Nguyen Vo, Trang N.; Hao, Jia; Chou, Josh; Oshima, Masamitsu; Aoki, Kazuhiro; Kuroda, Shinji; Kaboosaya, Boosana; Kasugai, Shohei                                                              | 2017 |
| A bacterial-biofilm-induced oral osteolytic infection can be successfully treated by immuno-targeting an extracellular nucleoid-associated protein.                                                   | Freire, M. O.; Devaraj, A.; Young, A.; Navarro, J. B.; Downey, J. S.; Chen, C.; Bakaletz, L. O.; Zadeh, H. H.; Goodman, S. D.                                                                  | 2017 |
| Biology of soft tissue wound healing and regeneration--consensus report of Group 1 of the 10th European Workshop on Periodontology.                                                                   | Hammerle, Christoph H. F.; Giannobile, William V.                                                                                                                                              | 2014 |
| The impact of antimicrobial photodynamic therapy on peri-implant disease: What mechanisms are involved in this novel treatment?                                                                       | Tavares, Livia Jacovassi; Pavarina, Ana Claudia; Vergani, Carlos Eduardo; de Avila, Erica Dorigatti                                                                                            | 2017 |
| Peri-implant parameters and C-reactive protein levels among patients with different obesity levels.                                                                                                   | Vohra, Fahim; Alkhudhairy, Fahad; Al-Kheraif, Abdulaziz A.; Akram, Zohaib; Javed, Fawad                                                                                                        | 2018 |
| Microbiological and aMMP-8 findings depending on peri-implant disease in patients undergoing supportive implant therapy.                                                                              | Ziebolz, Dirk; Schmalz, Gerhard; Gollasch, Daniel; Eickholz, Peter; Rinke, Sven                                                                                                                | 2017 |
| Peri-implant mucositis.                                                                                                                                                                               | Heitz-Mayfield, Lisa J. A.; Salvi, Giovanni E.                                                                                                                                                 | 2018 |
| Peri-implant mucositis.                                                                                                                                                                               | Heitz-Mayfield, Lisa J. A.; Salvi, Giovanni E.                                                                                                                                                 | 2018 |
| The role of lasers in the treatment of peri-implant diseases: A review.                                                                                                                               | Alshehri, Fahad Ali                                                                                                                                                                            | 2016 |
| Assessment of interleukin-1beta, interleukin-6, and tumor necrosis factor-Alpha levels in the peri-implant sulcular fluid among waterpipe (narghile) smokers and never-smokers with peri-implantitis. | Abduljabbar, Tariq; Akram, Zohaib; Vohra, Fahim; Warnakulasuriya, Saman; Javed, Fawad                                                                                                          | 2018 |
| Clinical and radiographic peri-implant parameters and proinflammatory cytokine levels among cigarette smokers, smokeless tobacco users, and nontobacco users.                                         | Akram, Zohaib; Vohra, Fahim; Bukhari, Ishfaq A.; Sheikh, Saeed A.; Javed, Fawad                                                                                                                | 2018 |
| Host-derived biomarkers at teeth and implants in partially edentulous patients. A                                                                                                                     | Ramseier, Christoph A.; Eick, Sigrun; Bronnimann, Claudia; Buser, Daniel; Bragger, Urs; Salvi, Giovanni E.                                                                                     | 2016 |
| Comparison of Peri-Implant Soft Tissue Parameters and Crestal Bone Loss Around Immediately Loaded and Delayed Loaded Implants in Smokers and Non-Smokers: 5-Year Follow-Up Results.                   | Al Amri, Mohammad D.; Kellesarian, Sergio Varela; Abduljabbar, Tariq S.; Al Rifai, Mohammad Q.; Al Baker, Abdulaziz M.; Al-Kheraif, Abdulaziz A.                                               | 2017 |
| Comparison between inflammation-related markers in peri-implant crevicular fluid and clinical parameters during osseointegration in edentulous jaws.                                                  | Bielemann, Amalia M.; Marcello-Machado, Raissa M.; Leite, Fabio Renato Manzolli; Martinho, Frederico Canato; Chagas-Junior, Otacilio Luiz; Antoninha Del Bel Cury, Altair; Faot, Fernanda      | 2018 |

|                                                                                                                                                                                                   |                                                                                                                                                                                                                                                                                                             |      |
|---------------------------------------------------------------------------------------------------------------------------------------------------------------------------------------------------|-------------------------------------------------------------------------------------------------------------------------------------------------------------------------------------------------------------------------------------------------------------------------------------------------------------|------|
| Haplotypes in BMP4 and FGF Genes Increase the Risk of Peri-Implantitis.                                                                                                                           | Coelho, Renata Barboza; Goncalves, Roberto Junior; Villas-Boas, Ricardo de Mello; Bonato, Leticia Ladeira; Quinelato, Valquiria; Pinheiro, Aristides da Rosa; Machado, Aldir; Nunes, Carlos Henrique Ramirez; Goncalves, Rackel; Vieira, Alexandre Resende; Granjeiro, Jose Mauro; Casado, Priscila Ladeira | 2016 |
| The Influence of Smoking on the Peri-Implant Microbiome.                                                                                                                                          | Tsigarida, A. A.; Dabdoub, S. M.; Nagaraja, H. N.; Kumar, P. S.                                                                                                                                                                                                                                             | 2015 |
| Smoking habit modulates peri-implant microbiome: A case-control study.                                                                                                                            | Pimentel, Suzana P.; Fontes, Melline; Ribeiro, Fernanda V.; Correa, Monica G.; Nishii, Denise; Cirano, Fabiano R.; Casati, Marcio Z.; Casarin, Renato C. V.                                                                                                                                                 | 2018 |
| The pathology of bone tissue during peri-implantitis.                                                                                                                                             | Schminke, B.; Vom Orde, F.; Gruber, R.; Schliephake, H.; Burgers, R.; Miosge, N.                                                                                                                                                                                                                            | 2015 |
| Establishment of Epithelial Attachment on Titanium Surface Coated with Platelet Activating Peptide.                                                                                               | Sugawara, Shiho; Maeno, Masahiko; Lee, Cliff; Nagai, Shigemi; Kim, David M.; Da Silva, John; Nagai, Masazumi; Kondo, Hisatomo                                                                                                                                                                               | 2016 |
| Receptor Activator of Nuclear Factor Kappa-B Ligand-Induced Local Osteoporotic Canine Mandible Model for the Evaluation of Peri-Implant Bone Regeneration.                                        | Chang, Ah Ryum; Cho, Tae Hyung; Hwang, Soon Jung                                                                                                                                                                                                                                                            | 2017 |
| An Exploratory Case-Control Study on the Impact of IL-1 Gene Polymorphisms on Early Implant Failure.                                                                                              | Cosyn, Jan; Christiaens, Veronique; Koningsveld, Vincent; Coucke, Paul J.; De Coster, Peter; De Paepe, Anne; De Bruyn, Hugo                                                                                                                                                                                 | 2016 |
| Peri-Implant Crevicular Fluid Analysis, Enzymes and Biomarkers: a Systematic Review.                                                                                                              | Dursun, Erhan; Tozum, Tolga Fikret                                                                                                                                                                                                                                                                          | 2016 |
| Diagnosing peri-implant disease using the tongue as a 24/7 detector.                                                                                                                              | Ritzer, J.; Luhmann, T.; Rode, C.; Pein-Hackelbusch, M.; Immohr, I.; Schedler, U.; Thiele, T.; Stubinger, S.; Rechenberg, B. V.; Waser-Althaus, J.; Schlottig, F.; Merli, M.; Dawe, H.; Karpisek, M.; Wyrwa, R.; Schnabelrauch, M.; Meinel, L.                                                              | 2017 |
| Salivary IL-1beta and red complex bacteria as predictors of the inflammatory status in sub-peri-implant niches of subjects with peri-implant mucositis.                                           | Acharya, Aneesha; Koh, Mei Leng; Kheur, Supriya; Watt, Rory M.; Jin, Lijian; Mattheos, Nikos                                                                                                                                                                                                                | 2016 |
| Lights and shadows of dental implants: focus on mucositis and perimplantitis and their biological markers.                                                                                        | Bottalico, L.; Tatullo, M.; Marrelli, M.; Santacroce, L.                                                                                                                                                                                                                                                    | 2016 |
| Accuracy of different diagnostic tests for early, delayed and late prosthetic joint infection.                                                                                                    | Fernandez-Sampedro, M.; Farinas-Alvarez, C.; Garcés-Zarzalejo, C.; Alonso-Aguirre, M. A.; Salas-Venero, C.; Martinez-Martinez, L.; Farinas, M. C.                                                                                                                                                           | 2017 |
| Peri-implantitis: a complex condition with non-linear characteristics.                                                                                                                            | Papantonopoulos, Georgios; Gogos, Christos; Housos, Efthymios; Bountis, Tassos; Loos, Bruno G.                                                                                                                                                                                                              | 2015 |
| Salivary Concentration of Oxidative Stress Biomarkers in a Group of Patients with Peri-Implantitis: A Transversal Study.                                                                          | Sanchez-Siles, Mariano; Lucas-Azorin, Javier; Salazar-Sanchez, Noemi; Carbonell-Meseguer, Luis; Camacho-Alonso, Fabio                                                                                                                                                                                       | 2016 |
| Introduction: Do microbes in the female reproductive function matter?                                                                                                                             | Simon, Carlos                                                                                                                                                                                                                                                                                               | 2018 |
| Drugs and diseases: Summary and consensus statements of group 1. The 5(th) EAO Consensus Conference 2018.                                                                                         | Schliephake, Henning; Sicilia, Alberto; Nawas, Bilal Al; Donos, Nikos; Gruber, Reinhard; Jepsen, Soren; Milinkovic, Iva; Mombelli, Andrea; Navarro, Jose Manuel; Quirynen, Marc; Rocchietta, Isabella; Schiodt, Morten; Schou, Soren; Stahl, Alexandra; Stavropoulos, Andreas                               | 2018 |
| Calprotectin and cross-linked N-telopeptides of type I collagen levels in crevicular fluid from implant sites with peri-implant diseases: a pilot study.                                          | Sakamoto, Eijiro; Kido, Rie; Tomotake, Yoritoki; Naitou, Yoshihito; Ishida, Yuichi; Kido, Jun-Ichi                                                                                                                                                                                                          | 2018 |
| Mechanism and Prevention of Titanium Particle-Induced Inflammation and Osteolysis.                                                                                                                | Eger, Michal; Hiram-Bab, Sahar; Liron, Tamar; Sterer, Nir; Carmi, Yaron; Kohavi, David; Gabet, Yankel                                                                                                                                                                                                       | 2018 |
| Level of Oxidative Stress Markers in Peri-Implant Crevicular Fluid and Their Correlation with Clinical Parameters.                                                                                | Mousavi Jazi, Mahvash; Sadeghi Pour Rodsari, Hamid Reza; Mirmiran, Faezeh                                                                                                                                                                                                                                   | 2015 |
| Non-surgical management of peri-implant diseases.                                                                                                                                                 | Patel, Amit                                                                                                                                                                                                                                                                                                 | 2014 |
| Clinical peri-implant parameters and inflammatory cytokine profile among smokers of cigarette, e-cigarette, and waterpipe.                                                                        | AlQahtani, Mohammed Ayedh; Alayad, Abdullah Saeed; Alshihri, Abdulmonem; Correa, Fernanda Oliveira Bello; Akram, Zohaib                                                                                                                                                                                     | 2018 |
| Amino acids and conceptus development during the peri-implantation period of pregnancy.                                                                                                           | Bazer, Fuller W.; Johnson, Gregory A.; Wu, G.                                                                                                                                                                                                                                                               | 2015 |
| The etiology of hard- and soft-tissue deficiencies at dental implants: A narrative review.                                                                                                        | Hammerle, Christoph H. F.; Tarnow, Dennis                                                                                                                                                                                                                                                                   | 2018 |
| The etiology of hard- and soft-tissue deficiencies at dental implants: A narrative review.                                                                                                        | Hammerle, Christoph H. F.; Tarnow, Dennis                                                                                                                                                                                                                                                                   | 2018 |
| Effect of the different implant protocols on peri-implant bone: a 6-month prospective study in beagle dogs.                                                                                       | Song, Dandan; Zheng, Hui; Huang, Yan; Ma, Xucheng; Ma, Guowu; Liang, Xin                                                                                                                                                                                                                                    | 2017 |
| Impact of heavy smoking on the clinical, microbiological and immunological parameters of patients with dental implants: a prospective cross-sectional study.                                      | Ata-Ali, Javier; Flichy-Fernandez, Antonio Juan; Alegre-Domingo, Teresa; Ata-Ali, Fadi; Penarrocha-Diago, Miguel                                                                                                                                                                                            | 2016 |
| The severity of human peri-implantitis lesions correlates with the level of submucosal microbial dysbiosis.                                                                                       | Kroger, Annika; Hulsman, Claudia; Fickl, Stefan; Spinell, Thomas; Huttig, Fabian; Kaufmann, Frederic; Heimbach, Andre; Hoffmann, Per; Enkling, Norbert; Renvert, Stefan; Schwarz, Frank; Demmer, Ryan T.; Papapanou, Panos N.; Jepsen, Soren; Kerschull, Moritz                                             | 2018 |
| Clinical and Radiographic Peri-Implant Parameters and Whole Salivary Interleukin-1beta and Interleukin-6 Levels among Type-2 Diabetic and Nondiabetic Patients with and without Peri-Implantitis. | Al-Askar, Mansour; Ajlan, Sumaiah; Alomar, Nuha; Al-Daghri, Nasser M.                                                                                                                                                                                                                                       | 2018 |
| Diagnostic accuracy of clinical parameters to monitor peri-implant conditions: A matched case-control study.                                                                                      | Monje, Alberto; Caballe-Serrano, Jordi; Nart, Jose; Penarrocha, David; Wang, Hom-Lay; Rakic, Mia                                                                                                                                                                                                            | 2018 |

|                                                                                                                                                                                                              |                                                                                                                                                                                                                                   |      |
|--------------------------------------------------------------------------------------------------------------------------------------------------------------------------------------------------------------|-----------------------------------------------------------------------------------------------------------------------------------------------------------------------------------------------------------------------------------|------|
| Volumetric Analysis of Gingival Crevicular Fluid and Peri-Implant Sulcus Fluid in Healthy and Diseased Sites: A Cross-Sectional Split-Mouth Pilot Study.                                                     | Bevilacqua, Lorenzo; Biasi, Matteo De; Lorenzon, Maria Giulia; Frattini, Costanza; Angerame, Daniele                                                                                                                              | 2016 |
| Antibacterial effect of doxycycline-coated dental abutment surfaces.                                                                                                                                         | Xing, Rui; Witso, Ingun L.; Jugowiec, Dawid; Tiainen, Hanna; Shabestari, Maziar; Lyngstadaas, Stale P.; Lonn-Stensrud, Jessica; Haugen, Havard J.                                                                                 | 2015 |
| Carryover effect of postpartum inflammatory diseases on developmental biology and fertility in lactating dairy cows.                                                                                         | Ribeiro, E. S.; Gomes, G.; Greco, L. F.; Cerri, R. L. A.; Vieira-Neto, A.; Monteiro, P. L. J. Jr; Lima, F. S.; Bisinotto, R. S.; Thatcher, W. W.; Santos, J. E. P.                                                                | 2016 |
| Peri-Implantation Hormonal Milieu: Elucidating Mechanisms of Adverse Neurodevelopmental Outcomes.                                                                                                            | Mainigi, Monica; Rosenzweig, Jason M.; Lei, Jun; Mensah, Virginia; Thomaier, Lauren; Talbot, C. Conover Jr; Olalere, Devvora; Ord, Teri; Rozzah, Rayyan; Johnston, Michael V.; Burd, Irina                                        | 2016 |
| Bone and soft tissue outcomes, risk factors, and complications of implant-supported prostheses: 5-Years RCT with different abutment types and loading protocols.                                             | Gothberg, Catharina; Grondahl, Kerstin; Omar, Omar; Thomsen, Peter; Slotte, Christer                                                                                                                                              | 2018 |
| Effect of history of periodontitis on implant success: meta-analysis and systematic review.                                                                                                                  | Ramanauskaitė, Ausra; Baseviciene, Nomeda; Wang, Hom-Lay; Tozum, Tolga F.                                                                                                                                                         | 2014 |
| Genetic involvement in dental implant failure: Association with polymorphisms of genes modulating inflammatory responses and bone metabolism.                                                                | Chen, Xun; Zhao, Yu                                                                                                                                                                                                               | 2019 |
| [DOHaD and pre- or peri-conceptual programming].                                                                                                                                                             | Chavatte-Palmer, Pascale; Vialard, Francois; Tarrade, Anne; Dupont, Charlotte; Duranthon, Veronique; Levy, Rachel                                                                                                                 | 2016 |
| Proinflammatory cytokine levels and peri-implant parameters among cigarette smokers, individuals vaping electronic cigarettes, and non-smokers.                                                              | ArRejaie, Aws S.; Al-Aali, Khulud Abdulrahman; Alrabiah, Mohammed; Vohra, Fahim; Mokeem, Sameer A.; Basunbul, Ghadeer; Alrahlah, Ali; Abduljabbar, Tariq                                                                          | 2019 |
| Biological and immunotoxicity evaluation of antimicrobial peptide-loaded coatings using a layer-by-layer process on titanium.                                                                                | Shi, Jue; Liu, Yu; Wang, Ying; Zhang, Jing; Zhao, Shifang; Yang, Guoli                                                                                                                                                            | 2015 |
| Significant Enrichment and Diversity of the Staphylococcal Arginine Catabolic Mobile Element ACME in Staphylococcus epidermidis Isolates From Subgingival Peri-implantitis Sites and Periodontal Pockets.    | O'Connor, Aoife M.; McManus, Brenda A.; Kinnevey, Peter M.; Brennan, Grainne I.; Fleming, Tanya E.; Cashin, Phillipa J.; O'Sullivan, Michael; Polyzois, Ioannis; Coleman, David C.                                                | 2018 |
| Association of Global DNA Methylation to Titanium and Peri-Implantitis: A Case-Control Study.                                                                                                                | Daubert, D. M.; Pozhitkov, A. E.; Safioti, L. M.; Kotsakis, G. A.                                                                                                                                                                 | 2019 |
| Effect of lentiviral vector overexpression alpha-calcitonin gene-related peptide on titanium implant osseointegration in alpha-CGRP-deficient mice.                                                          | Xiang, Lin; Ma, Li; Wei, Na; Wang, Tianlu; Yao, Qianqian; Yang, Bo; Xiong, Yi; Wu, Yingying; Gong, Ping                                                                                                                           | 2017 |
| Sophocarpine attenuates wear particle-induced implant loosening by inhibiting osteoclastogenesis and bone resorption via suppression of the NF-kappaB signalling pathway in a rat model.                     | Zhou, Chen-He; Shi, Zhong-Li; Meng, Jia-Hong; Hu, Bin; Zhao, Chen-Chen; Yang, Yu-Te; Yu, Wei; Chen, Ze-Xin; Heng, Boon Chin; Parkman, Virginia-Jeni Akila; Jiang, Shuai; Zhu, Han-Xiao; Wu, Hao-Bo; Shen, Wei-Liang; Yan, Shi-Gui | 2018 |
| Identification of microbiota in peri-implantitis pockets by matrix-assisted laser desorption/ionization time-of-flight mass spectrometry.                                                                    | Yeh, Hwey-Chin; Lu, Jang-Jih; Chang, Shih-Cheng; Ge, Mao-Cheng                                                                                                                                                                    | 2019 |
| The effects of nerve growth factor on endothelial cells seeded on different titanium surfaces.                                                                                                               | Guang, M.; Yao, Y.; Zhang, L.; Huang, B.; Ma, L.; Xiang, L.; Jin, J.; Gong, P.                                                                                                                                                    | 2015 |
| Influence of titanium on in vitro fibroblast-Porphyromonas gingivalis interaction in peri-implantitis.                                                                                                       | Irshad, Muhammad; Scheres, Nina; Crielaard, Wim; Loos, Bruno G.; Wismeijer, Daniel; Laine, Marja L.                                                                                                                               | 2013 |
| Bone loss biomarkers associated with peri-implantitis. A cross-sectional study.                                                                                                                              | Rakic, Mia; Lekovic, Vojislav; Nikolic-Jakoba, Natasa; Vojvodic, Danilo; Petkovic-Curcin, Aleksandra; Sanz, Mariano                                                                                                               | 2013 |
| Clinical and laboratory evaluation of the effects of different treatment modalities on titanium healing caps: a randomized, controlled clinical trial.                                                       | Schmidt, Kristina Emily; Auschill, Thorsten Mathias; Heumann, Christian; Frankenberger, Roland; Eick, Sigrun; Sculean, Anton; Arweiler, Nicole Birgit                                                                             | 2018 |
| Assessment of interleukin-1beta and interleukin-6 in the crevicular fluid around healthy implants, implants with peri-implantitis, and healthy teeth: a cross-sectional study.                               | Yaghobee, Siamak; Khorsand, Afshin; Rasouli Ghohroudi, Amir Alireza; Sanjari, Khashayar; Kadkhodazadeh, Mahdi                                                                                                                     | 2014 |
| VEGF, Microvessel Density, and CD44 as Inflammation Markers in Peri-implant Healthy Mucosa, Peri-implant Mucositis, and Peri-implantitis: Impact of Age, Smoking, PPD, and Obesity.                          | Lucarini, Guendalina; Zizzi, Antonio; Rubini, Corrado; Ciolino, Francesco; Aspriello, Simone Domenico                                                                                                                             | 2019 |
| Effects of moderate intensity static magnetic fields on osteoclastic differentiation in mouse bone marrow cells.                                                                                             | Kim, Eun-Cheol; Park, Jaesuh; Noh, Gunwoo; Park, Su-Jung; Noh, Kwantae; Kwon, Il-Keun; Ahn, Su-Jin                                                                                                                                | 2018 |
| Levels of Myeloperoxidase and Alkaline Phosphatase in Periimplant Sulcus Fluid in Health and Disease and After Nonsurgical Therapy.                                                                          | Malik, Nikita; Naik, Dilip; Uppoor, Ashita                                                                                                                                                                                        | 2015 |
| Bio-inspired stable antimicrobial peptide coatings for dental applications.                                                                                                                                  | Holmberg, Kyle V.; Abdolhosseini, Mahsa; Li, Yuping; Chen, Xi; Gorr, Sven-Ulrik; Aparicio, Conrado                                                                                                                                | 2013 |
| Surface treatments on titanium implants via nanostructured ceria for antibacterial and anti-inflammatory capabilities.                                                                                       | Li, Xue; Qi, Manlin; Sun, Xiaolin; Weir, Michael D.; Tay, Franklin R.; Oates, Thomas W.; Dong, Biao; Zhou, Yanmin; Wang, Lin; Xu, Hockin H. K.                                                                                    | 2019 |
| Effect of sustained release of rhBMP-2 from dried and wet hyaluronic acid hydrogel carriers compared with direct dip coating of rhBMP-2 on peri-implant osteogenesis of dental implants in canine mandibles. | Pan, Hui; Han, Jeong Joon; Park, Yong-Doo; Cho, Tae Hyung; Hwang, Soon Jung                                                                                                                                                       | 2016 |
| Reduction of Tribocorrosion Products When Using the Platform-Switching Concept.                                                                                                                              | Alrabeah, G. O.; Knowles, J. C.; Petridis, H.                                                                                                                                                                                     | 2018 |
| The synergistic effect of TiO2 nanoporous modification and platelet-rich plasma treatment on titanium-implant stability in ovariectomized rats.                                                              | Jiang, Nan; Du, Pinggong; Qu, Weidong; Li, Lin; Liu, Zhonghao; Zhu, Songsong                                                                                                                                                      | 2016 |
| Influence of titanium ions on cytokine levels of murine splenocytes stimulated with periodontopathic bacterial lipopolysaccharide.                                                                           | Nishimura, Kota; Kato, Tetsuo; Ito, Taichi; Oda, Takashi; Sekine, Hideshi; Yoshinari, Masao; Yajima, Yasutomo                                                                                                                     | 2014 |
| Soft tissue wound healing at teeth, dental implants and the edentulous ridge when using barrier membranes, growth and differentiation factors and soft tissue substitutes.                                   | Vignoletti, Fabio; Nunez, Javier; Sanz, Mariano                                                                                                                                                                                   | 2014 |

|                                                                                                                                                                                                                             |                                                                                                                                                                                                                                                                           |      |
|-----------------------------------------------------------------------------------------------------------------------------------------------------------------------------------------------------------------------------|---------------------------------------------------------------------------------------------------------------------------------------------------------------------------------------------------------------------------------------------------------------------------|------|
| rgpA DNA vaccine induces antibody response and prevents alveolar bone loss in experimental peri-implantitis.                                                                                                                | Fan, Xin; Wang, Zhifeng; Ji, Ping; Bian, Yuanyuan; Lan, Jing                                                                                                                                                                                                              | 2013 |
| Enamel matrix derivative improves gingival fibroblast cell behavior cultured on titanium surfaces.                                                                                                                          | Wang, Yulan; Zhang, Yufeng; Jing, Dai; Shuang, Yang; Miron, Richard J.                                                                                                                                                                                                    | 2016 |
| High in vitro antibacterial activity of Pac-525 against Porphyromonas gingivalis biofilms cultured on titanium.                                                                                                             | Li, Ji-yin; Wang, Xue-jin; Wang, Li-na; Ying, Xiao-xia; Ren, Xiang; Liu, Hui-ying; Xu, Li; Ma, Guo-wu                                                                                                                                                                     | 2015 |
| Comparison of cotinine levels in the peri-implant sulcular fluid among cigarette and waterpipe smokers, electronic-cigarette users, and nonsmokers.                                                                         | Alqahtani, Fawaz; Alqahtani, Mana; Albaqawi, Ahmed Heji; Al-Kheraif, Abdulaziz A.; Javed, Fawad                                                                                                                                                                           | 2019 |
| Comparison of the levels of tumor necrosis factor-alpha and interleukin-17 in gingival crevicular fluid of patients with peri-implantitis and a control group with healthy implants.                                        | Darabi, Ehsan; Kadkhoda, Zeinab; Amirzargar, Aliakbar                                                                                                                                                                                                                     | 2013 |
| Clinical outcome of a nonsurgical and surgical treatment protocol in different types of peri-implantitis: a case series.                                                                                                    | Thierbach, Rene; Eger, Thomas                                                                                                                                                                                                                                             | 2013 |
| The role of nicotine, cotinine and caffeine on the electrochemical behavior and bacterial colonization to cp-Ti.                                                                                                            | Barao, Valentim A. R.; Ricomini-Filho, Antonio P.; Faverani, Leonardo P.; Del Bel Cury, Altair A.; Sukotjo, Cortino; Monteiro, Douglas R.; Yuan, Judy Chia-Chun; Mathew, Mathew T.; do Amaral, Regiane C.; Mesquita, Marcelo F.; da Silva, Wander J.; Assuncao, Wirley G. | 2015 |
| Microbiological aspects of human mandibular subperiosteal dental implants.                                                                                                                                                  | Rams, Thomas E.; Balkin, Burton E.; Roberts, Thomas W.; Molzan, Arthur K.                                                                                                                                                                                                 | 2013 |
| The impact of Aggregatibacter actinomycetemcomitans biofilm-derived effectors following antimicrobial photodynamic therapy on cytokines production in human gingival fibroblasts.                                           | Peeridogaheh, Hadi; Pourhajibagher, Maryam; Barikani, Hamid Reza; Bahador, Abbas                                                                                                                                                                                          | 2019 |
| The impact of genotypes and immune reactivity on peri-implant inflammation: Identification and therapeutic use of anti-inflammatory drugs and immunomodulators.                                                             | Van Dyke, Thomas E.                                                                                                                                                                                                                                                       | 2012 |
| Interleukin-1beta and interleukin-6 expression and gene polymorphisms in subjects with peri-implant disease.                                                                                                                | Melo, Rafaela F.; Lopes, Beatriz M. V.; Shibli, Jamil A.; Marcantonio, Elcio Jr; Marcantonio, Rosemary Adriana C.; Galli, Gloria M. Thompson                                                                                                                              | 2012 |
| In vivo osteoprotegerin gene therapy preventing bone loss induced by periodontitis.                                                                                                                                         | Tang, H.; Mattheos, N.; Yao, Y.; Jia, Y.; Ma, L.; Gong, P.                                                                                                                                                                                                                | 2015 |
| Antibacterial Peptide-Based Gel for Prevention of Medical Implanted-Device Infection.                                                                                                                                       | Mateescu, Mihaela; Baixe, Sebastien; Garnier, Tony; Jierry, Loic; Ball, Vincent; Haikel, Youssef; Metz-Boutigue, Marie Helene; Nardin, Michel; Schaaf, Pierre; Etienne, Olivier; Laval, Philippe                                                                          | 2015 |
| Would nitric oxide be an effective marker for earlier stages of peri-implant disease? An analysis in human peri-implant sulcular fluid.                                                                                     | Vieira, Andreia Espindola; Moura, Camilla Christian Gomes; de Souza, Maria Aparecida; Zanetta-Barbosa, Darcey; Dechichi, Paula                                                                                                                                            | 2013 |
| Treatment of peri-implantitis using multiple applications of chlorhexidine chips: a double-blind, randomized multi-centre clinical trial.                                                                                   | Machtei, Eli E.; Frankenthal, Shai; Levi, Guy; Elimelech, Rina; Shoshani, Eyal; Rosenfeld, Olivia; Tagger-Green, Nirit; Shlomi, Benjamin                                                                                                                                  | 2012 |
| Cytokine, chemokine, and growth factor levels in peri-implant sulcus during wound healing and osseointegration after piezosurgical versus conventional implant site preparation: Randomized, controlled, split-mouth trial. | Gurkan, Ali; Tekdal, Gozde Peker; Bostanci, Nagihan; Belibasakis, Georgios N.                                                                                                                                                                                             | 2019 |
| Analysis of cathepsin-K activity at tooth and dental implant sites and the potential of this enzyme in reflecting alveolar bone loss.                                                                                       | Yamalik, Nermin; Gunday, Sevim; Uysal, Serdar; Kilinc, Kamer; Karabulut, Erdem; Tozum, Tolga F.                                                                                                                                                                           | 2012 |
| Successful management of peri-implantitis with a regenerative approach: a consecutive series of 51 treated implants with 3- to 7.5-year follow-up.                                                                          | Froum, Stuart J.; Froum, Scott H.; Rosen, Paul S.                                                                                                                                                                                                                         | 2012 |
| [Influence of the peri-implantitis to the microscrew-bone interface].                                                                                                                                                       | Hu, Yun; Zheng, Lei-le; Tang, Tian; Zhao, Zhi-he; Song, Jin-lin; Deng, Feng                                                                                                                                                                                               | 2011 |
| Microbiological profile and calprotectin expression in naturally occurring and experimentally induced gingivitis.                                                                                                           | Farina, Roberto; Guarnelli, Maria Elena; Figuero, Elena; Herrera, David; Sanz, Mariano; Trombelli, Leonardo                                                                                                                                                               | 2012 |
| Antimicrobial activity of nanoparticulate metal oxides against peri-implantitis pathogens.                                                                                                                                  | Vargas-Reus, Miguel A.; Memarzadeh, Kaveh; Huang, Jie; Ren, Guogang G.; Allaker, Robert P.                                                                                                                                                                                | 2012 |
| Relationship between interleukin-1 genotype and peri-implantitis: a literature review.                                                                                                                                      | Andreiotelli, Marina; Koutayas, Spiridon-Oumvertos; Madianos, Phoebus N.; Strub, Jorg-Rudolf                                                                                                                                                                              | 2008 |
| Commensal and pathogenic biofilms differently modulate peri-implant oral mucosa in an organotypic model.                                                                                                                    | Ingendoh-Tsakmakidis, Alexandra; Mikolai, Carina; Winkel, Andreas; Szafranski, Szymon P.; Falk, Christine S.; Rossi, Angela; Walles, Heike; Stiesch, Meike                                                                                                                | 2019 |
| Influence of antibiotic prophylaxis on the stability of orthodontic microimplants: A pilot randomized controlled trial.                                                                                                     | Lyczek, Jan; Kawala, Beata; Antoszevska-Smith, Joanna                                                                                                                                                                                                                     | 2018 |
| Rescuing failed oral implants via Wnt activation.                                                                                                                                                                           | Yin, Xing; Li, Jingtao; Chen, Tao; Mouraret, Sylvain; Dhamdhere, Girija; Brunski, John B.; Zou, Shujuan; Helms, Jill A.                                                                                                                                                   | 2016 |
| A controlled clinical exploratory study on genetic markers for peri-implantitis.                                                                                                                                            | Hall, Jan; Britse, Anna Ornhall; Jemt, Torsten; Friberg, Bertil                                                                                                                                                                                                           | 2011 |
| Controlled release of metronidazole from composite poly-epsilon-caprolactone/alginate (PCL/alginate) rings for dental implants.                                                                                             | Lan, Shih-Feng; Kehinde, Timilehin; Zhang, Xiangming; Khajotia, Sharukh; Schmidtke, David W.; Starly, Binil                                                                                                                                                               | 2013 |
| Regenerative treatment of peri-implantitis bone defects with a combination of autologous bone and a demineralized xenogenic bone graft: a series of 36 defects.                                                             | Wiltfang, Jorg; Zernial, Oliver; Behrens, Eleonore; Schlegel, Andreas; Warnke, Patrick H.; Becker, Stephan T.                                                                                                                                                             | 2012 |
| Receptor activator of nuclear factor kappa B ligand (RANKL) levels in peri-implant crevicular fluid.                                                                                                                        | Sarlati, Fatemeh; Sattari, Mandana; Gazar, Ali Ghorbani; Rafsenjani, Ali Nabavizadeh                                                                                                                                                                                      | 2010 |
| Plaque-induced gingivitis: Case definition and diagnostic considerations.                                                                                                                                                   | Trombelli, Leonardo; Farina, Roberto; Silva, Cleverson O.; Tatakis, Dimitris N.                                                                                                                                                                                           | 2018 |
| Plaque-induced gingivitis: Case definition and diagnostic considerations.                                                                                                                                                   | Trombelli, Leonardo; Farina, Roberto; Silva, Cleverson O.; Tatakis, Dimitris N.                                                                                                                                                                                           | 2018 |

|                                                                                                                                                                                                   |                                                                                                                                                                    |      |
|---------------------------------------------------------------------------------------------------------------------------------------------------------------------------------------------------|--------------------------------------------------------------------------------------------------------------------------------------------------------------------|------|
| Osteoprotegerin levels in peri-implant crevicular fluid.                                                                                                                                          | Arikan, Fatih; Buduneli, Nurcan; Kutukculer, Necil                                                                                                                 | 2008 |
| Correlation of peri-implant health and myeloperoxidase levels: a cross-sectional clinical study.                                                                                                  | Liskmann, Stanislav; Zilmer, Mihkel; Vihalemm, Tiit; Salum, Olev; Fischer, Krista                                                                                  | 2004 |
| BMP2/7 heterodimer is a stronger inducer of bone regeneration in peri-implant bone defects model than BMP2 or BMP7 homodimer.                                                                     | Sun, Ping; Wang, Jingxiao; Zheng, Yuanna; Fan, Yi; Gu, Zhiyuan                                                                                                     | 2012 |
| Transforming growth factor-beta 1 expression in the peri-implant soft tissues of healthy and failing dental implants.                                                                             | Cornelini, Roberto; Rubini, Corrado; Fioroni, Massimiliano; Favero, Gian Antonio; Strocchi, Rita; Piattelli, Adriano                                               | 2003 |
| The effect of interleukin-1 allele 2 genotype (IL-1a(-889) and IL-1b(+3954)) on the individual's susceptibility to peri-implantitis: case-control study.                                          | Hamdy, Ahmed Abd El-Meguid Mostafa; Ebrahim, Mohamed Abd El-Moniem                                                                                                 | 2011 |
| Augmentation of alveolar bone and dental implant osseointegration: clinical implications of studies with rhBMP-2.                                                                                 | Wikesjo, U. M.; Sorensen, R. G.; Wozney, J. M.                                                                                                                     | 2001 |
| Concentration- and time-dependent response of human gingival fibroblasts to fibroblast growth factor 2 immobilized on titanium dental implants.                                                   | Ma, Qianli; Wang, Wei; Chu, Paul K.; Mei, Shenglin; Ji, Kun; Jin, Lei; Zhang, Yumei                                                                                | 2012 |
| Impact of IL-1 genotype and smoking status on the prognosis of osseointegrated implants.                                                                                                          | Gruica, Boris; Wang, Hwa-Ying; Lang, Niklaus P.; Buser, Daniel                                                                                                     | 2004 |
| Biological factors involved in implant-anchored orthodontics and in prosthetic-implant therapy: a literature review.                                                                              | Antoszewska, Joanna; Raftowicz-Wojcik, Katarzyna; Kawala, Beata; Matthews-Brzozowska, Teresa                                                                       | 2010 |
| Longitudinal evaluation of aspartate aminotransferase in the crevicular fluid of implants with bone loss and signs of progressive disease.                                                        | Ruhling, A.; Jepsen, S.; Kocher, T.; Plagmann, H. C.                                                                                                               | 1999 |
| Impact of implant overloading on the peri-implant bone in inflamed and non-inflamed peri-implant mucosa.                                                                                          | Kozlovsky, Avital; Tal, Haim; Laufer, Ben-Zion; Leshem, Roy; Rohrer, Michael D.; Weinreb, Miron; Artzi, Zvi                                                        | 2007 |
| Collagenase-2 (MMP-8) as a point-of-care biomarker in periodontitis and cardiovascular diseases. Therapeutic response to non-antimicrobial properties of tetracyclines.                           | Sorsa, Timo; Tervahartiala, Taina; Leppilahti, Jussi; Hernandez, Marcela; Gamonal, Jorge; Tuomainen, Anita M.; Lauhio, Anneli; Pussinen, Pirkko J.; Mantyla, Paivi | 2011 |
| Immunohistochemical characteristics of inflammatory lesions at implants.                                                                                                                          | Gualini, Federico; Berglundh, Tord                                                                                                                                 | 2003 |
| [Clinical, microbiological and immunological findings in peri-implantitis patients with bar-retained lower removable partial dentures, compared to a healthy control group (12-month-follow-up)]. | Mesmer, Christian; Forster, Andras; Antal, Mark; Nagy, Katalin                                                                                                     | 2012 |
| Does photodynamic therapy enhance standard antibacterial therapy in dentistry?                                                                                                                    | Javed, Fawad; Romanos, Georgios E.                                                                                                                                 | 2013 |
| Vascular endothelial growth factor in gingival crevicular fluid around dental implants.                                                                                                           | Mierzwinska-Nastalska, Elzbieta; Lomzynski, L.; Jaworska-Zaremba, M.; Kostrzewa-Janicka, J.                                                                        | 2010 |
| Effects of diabetes mellitus on periodontal and peri-implant conditions: update on associations and risks.                                                                                        | Salvi, Giovanni E.; Carollo-Bittel, Barbara; Lang, Niklaus P.                                                                                                      | 2008 |
| Microbiological findings and host response in patients with peri-implantitis.                                                                                                                     | Hultin, Margareta; Gustafsson, Anders; Hallstrom, Hadar; Johansson, L.-A.; Ekfeldt, Anders; Klinge, Bjorn                                                          | 2002 |
| CrossLaps and beta-glucuronidase in peri-implant and gingival crevicular fluid.                                                                                                                   | Schubert, U.; Kleber, B. M.; Strietzel, F. P.; Dorfling, P.                                                                                                        | 2001 |
| Detection and measurement of inflammatory cytokines in implant crevicular fluid: a pilot study.                                                                                                   | Panagakos, F. S.; Aboyoussef, H.; Dondero, R.; Jandinski, J. J.                                                                                                    | 1996 |
| Comparing culture, real-time PCR and fluorescence resonance energy transfer technology for detection of Porphyromonas gingivalis in patients with or without peri-implant infections.             | Galassi, F.; Kaman, W. E.; Anssari Moin, D.; van der Horst, J.; Wismeijer, D.; Crielaard, W.; Laine, M. L.; Veerman, E. C. I.; Bikker, F. J.; Loos, B. G.          | 2012 |
| A critical assessment of interleukin-1 (IL-1) genotyping when used in a genetic susceptibility test for severe chronic periodontitis.                                                             | Greenstein, Gary; Hart, Thomas C.                                                                                                                                  | 2002 |
| C-telopeptide pyridinoline crosslinks of type I collagen, soluble RANKL, and osteoprotegerin levels in crevicular fluid of dental implants with peri-implantitis: a case-control study.           | Arikan, Fatih; Buduneli, Nurcan; Lappin, David F.                                                                                                                  | 2011 |
| Vascular endothelial growth factor and microvessel density around healthy and failing dental implants.                                                                                            | Cornelini, R.; Artese, L.; Rubini, C.; Fioroni, M.; Ferrero, G.; Santinelli, A.; Piattelli, A.                                                                     | 2001 |
| Teeth and implant surroundings: clinical health indices and microbiologic parameters.                                                                                                             | Vered, Yuval; Zini, Avi; Mann, Jonathan; Kolog, Hila; Steinberg, Doron; Zambon, Joseph J.; Haraszthy, Violet I.; DeVizio, William; Sreenivasan, Prem               | 2011 |
| Two-stage implant systems.                                                                                                                                                                        | Fritz, M. E.                                                                                                                                                       | 1999 |
| Macrophage polarization in aseptic bone resorption around dental implants induced by Ti particles in a murine model.                                                                              | Wang, Xin; Li, Yu; Feng, Yuan; Cheng, Haode; Li, Dehua                                                                                                             | 2019 |
| Analysis of aspartate aminotransferase and alkaline phosphatase in crevicular fluid from implants with and without peri-implantitis.                                                              | Paknejad, Mojgan; Emtiaz, Shahram; Khoobyari, Mohammad Mohsen; Gharb, Mehrnoush Teimouri; Yazdi, Mojtaba Tabatabaei                                                | 2006 |
| Clinical utility of a genetic susceptibility test for severe chronic periodontitis: a critical evaluation.                                                                                        | Greenstein, Gary; Hart, Thomas C.                                                                                                                                  | 2002 |
| In vitro evaluation of the effects of low-intensity Nd:YAG laser irradiation on the inflammatory reaction elicited by bacterial lipopolysaccharide adherent to titanium dental implants.          | Giannelli, Marco; Bani, Daniele; Tani, Alessia; Pini, Alessandro; Margheri, Martina; Zecchi-Orlandini, Sandra; Tonelli, Paolo; Formigli, Lucia                     | 2009 |
| Role of fibroblast populations in peri-implantitis.                                                                                                                                               | Bordin, Sandra; Flemmig, Thomas F.; Verardi, Simone                                                                                                                | 2009 |
| Clinical consequences of IL-1 genotype on early implant failures in patients under periodontal maintenance.                                                                                       | Jansson, Henrik; Hamberg, Kristina; De Bruyn, Hugo; Bratthall, Gunilla                                                                                             | 2005 |
| Crevicular fluid analysis around two failing dental implants: a clinical report.                                                                                                                  | Curtis, D. A.; Kao, R.; Plesh, O.; Finzen, F.; Franz, L.                                                                                                           | 1997 |
| C-telopeptide pyridinoline cross-links (ICTP) and periodontal pathogens associated with endosseous oral implants.                                                                                 | Oringer, R. J.; Palys, M. D.; Iranmanesh, A.; Fiorellini, J. P.; Haffajee, A. D.; Socransky, S. S.; Giannobile, W. V.                                              | 1998 |

|                                                                                                                                                                                                          |                                                                                                                                                                  |      |
|----------------------------------------------------------------------------------------------------------------------------------------------------------------------------------------------------------|------------------------------------------------------------------------------------------------------------------------------------------------------------------|------|
| Laminin-5 gamma2-chain and collagenase-2 (MMP-8) in human peri-implant sulcular fluid.                                                                                                                   | Kivela-Rajamaki, Marjo J.; Teronen, Olli P.; Maisi, Paivi; Husa, Ville; Tervahartala, Taina I.; Pirila, Emma M.; Salo, Tuula A.; Mellanen, Liisa; Sorsa, Timo A. | 2003 |
| Sulcus fluid bone marker levels and the outcome of surgical treatment of peri-implantitis                                                                                                                | Wohlfahrt, J.C.; Aass, A.M.; Granfeldt, F.; Lyngstadaas, S.P.; Reseland, J.E.                                                                                    | 2014 |
| Levels of osteoclastogenesis-related factors in the peri-implant crevicular fluid and clinical parameters of immediately loaded implants in patients with osteopenia: a short-term report                | Onuma, T.; Aquiar, K.; Duarte, P.M.; Feres, M.; Giro, G.; Coelho, P.; Cassoni, A.; Shibli, J.A.                                                                  | 2015 |
| Periodontal disease, peri-implant disease and levels of salivary biomarkers IL-1 $\beta$ , IL-10, RANK, OPG, MMP-2, TGF- $\beta$ and TNF- $\alpha$ : follow-up over 5 years                              | Gomes A.M.; Douglas-de-Oliveira D.W.; Ferreira S.D.; Silva T.A.D.; Cota L.O.M.; Costa F.O.                                                                       | 2019 |
| Association of advanced glycation end products with peri-implant inflammation in prediabetes and type 2 diabetes mellitus patients                                                                       | Alrabiah M.; Al-Aali K.A.; Al-Sowayh Z.H.; Binmahfooz A.M.; Mokeem S.A.; Abduljabbar T.                                                                          | 2018 |
| Peri-implant conditions and levels of advanced glycation end products among patients with different glycemic control                                                                                     | Al-Sowayh Z.H.; Ghani S.M.A.; Sergis K.; Vohra F.; Akram Z.                                                                                                      | 2018 |
| Expression Levels of Semaphorins 3A, 3B, 4A, and 4D on Human Peri-implantitis                                                                                                                            | Bastos M.F.; de Franco L.; Garcia Tebar A.C.; Giro G.; Shibli J.A.                                                                                               | 2018 |
| New approach for vertical bone regeneration using in situ gelling and sustained BMP-2 releasing poly(phosphazene) hydrogel system on peri-implant site with critical defect in a canine model            | Seo B.-B.; Chang H.-I.; Choi H.; Koh J.-T.; Yun K.-D.; Lee J.-Y.; Song S.-C.                                                                                     | 2018 |
| Assessment of matrix metalloproteinase-8 and -9 levels in the peri-implant sulcular fluid among waterpipe (narghile) smokers and never-smokers with peri-implantitis                                     | Al-Sowayh Z.H.; Aldamkh M.K.; Binmahfooz A.M.; Al-Aali K.A.; Akram Z.; Qutub O.A.; Javed F.; Abduljabbar T.                                                      | 2018 |
| Long-Term Effects of Bone Morphogenetic Protein-2-Loaded Calcium Phosphate on Maxillary Sinus Lift Surgery for Delayed and Simultaneous Dental Implantation                                              | Ding Y.; Wang X.                                                                                                                                                 | 2018 |
| Comparison of two different techniques used for the maintenance of peri-implant soft tissue health: a pilot randomized clinical trial                                                                    | Al Ghazal L.; O'Sullivan J.; Claffey N.; Polyzois I.                                                                                                             | 2017 |
| Effects of nano-hydroxyapatite/ polyetheretherketone-coated, sandblasted, large-grit, and acid-etched implants on inflammatory cytokines and osseointegration in a peri-implantitis model in beagle dogs | Yang H.-W.; Tang X.-S.; Tian Z.-W.; Wang Y.; Yang W.-Y.; Hu J.-Z.                                                                                                | 2017 |
| Association of Cytokine Gene Polymorphism with Peri-implantitis Risk                                                                                                                                     | Petkovic-Curcin A.; Zeljcic K.; Cikota-Aleksic B.; Dakovic D.; Tatic Z.; Magic Z.                                                                                | 2017 |
| Th17-related cytokines in mucositis: is there any difference between peri-implantitis and periodontitis patients?                                                                                        | Teixeira M.K.S.; Lira-Junior R.; Telles D.M.; Lourenço E.J.V.; Figueredo C.M.                                                                                    | 2017 |
| Impact of a chronic smoking habit on the osteo-immunoinflammatory mediators in the peri-implant fluid of clinically healthy dental implants                                                              | Negri B.M.; Pimentel S.P.; Casati M.Z.; Cirano F.R.; Casarin R.C.; Ribeiro F.V.                                                                                  | 2016 |
| Reosseointegration Following Regenerative Therapy of Tissue-Engineered Bone in a Canine Model of Experimental Peri-Implantitis                                                                           | Xu L.; Sun X.; Bai J.; Jiang L.; Wang S.; Zhao J.; Xia L.; Zhang X.; Wen J.; Li G.; Jiang X.                                                                     | 2016 |
| Bone Response and Soft Tissue Changes Around Implants With/Without Abutments Supporting Fixed Partial Dentures: Results From a 3-Year, Prospective, Randomized, Controlled Study                         | Göthberg C.; André U.; Gröndahl K.; Thomsen P.; Slotte C.                                                                                                        | 2016 |
| Regenerative Medicine for Periodontal and Peri-implant Diseases                                                                                                                                          | Larsson L.; Decker A.M.; Nibali L.; Pilipchuk S.P.; Berglundh T.; Giannobile W.V.                                                                                | 2016 |
| Clinical, microbiological, and immunological aspects of healthy versus peri-implantitis tissue in full arch reconstruction patients: a prospective cross-sectional study                                 | Ata-Ali J.; Flichy-Fernández A.J.; Alegre-Domingo T.; Ata-Ali F.; Palacio J.; Peñarocha-Diogo M.                                                                 | 2015 |
| A cross-sectional assessment of biomarker levels around implants versus natural teeth in periodontal maintenance patients                                                                                | Recker E.N.; Avila-Ortiz G.; Fischer C.L.; Pagan-Rivera K.; Brogden K.A.; Dawson D.V.; Elangovan S.                                                              | 2015 |
| kgp, rgpA, and rgpB DNA vaccines induce antibody responses in experimental peri-implantitis                                                                                                              | Guo M.; Wang Z.; Fan X.; Bian Y.; Wang T.; Zhu L.; Lan J.                                                                                                        | 2014 |
| Cytokines expression in saliva and peri-implant crevicular fluid of patients with peri-implant disease                                                                                                   | Fonseca F.J.; Moraes Junior M.; Lourenço E.J.; Teles D.d.e M.; Figueredo C.M.                                                                                    | 2014 |
| Interleukins 1 $\beta$ and 10 expressions in the periimplant crevicular fluid from patients with untreated periimplant disease                                                                           | Casado P.L.; Canullo L.; De Almeida Filardy A.; Granjeiro J.M.; Barboza E.P.; Leite Duarte M.E.                                                                  | 2013 |
| Acute Inflammatory Response to Laser-Induced Micro- and Nano-Sized Titanium Surface Features                                                                                                             | Palmquist A.; Johansson A.; Suska F.; Brånemark R.; Thomsen P.                                                                                                   | 2013 |
| Significance of keratinized mucosa around dental implants: A prospective comparative study                                                                                                               | Boynueğri D.; Nemli S.K.; Kasko Y.A.                                                                                                                             | 2013 |
| Gene Expression of Inflammation and Bone Healing in Peri-Implant Crevicular Fluid after Placement and Loading of Dental Implants. A Kinetic Clinical Pilot Study Using Quantitative Real-Time PCR        | Slotte C.; Lennerås M.; Göthberg C.; Suska F.; Zoric N.; Thomsen P.; Nannmark U.                                                                                 | 2012 |
| Evaluation of periimplant crevicular fluid prostaglandin e2 and matrix metalloproteinase-8 levels from health to periimplant disease status: A prospective study                                         | Basegmez C.; Yalcin S.; Yalcin F.; Ersanli S.; Mijiritsky E.                                                                                                     | 2012 |
| Metagenomic analysis of the peri-implant and periodontal microflora in patients with clinical signs of gingivitis or mucositis                                                                           | Heuer W.; Kettenring A.; Stumpp S.N.; Eberhard J.; Gellermann E.; Winkel A.; Stiesch M.                                                                          | 2012 |
| Correlation between different genotypes of human cytomegalovirus and Epstein-Barr virus and peri-implant tissue status                                                                                   | Jankovic S.; Aleksic Z.; Dimitrijevic B.; Lekovic V.; Milinkovic I.; Kenney B.                                                                                   | 2011 |
| Platelet-derived growth factor applications in periodontal and peri-implant bone regeneration                                                                                                            | Kaigler D.; Avila G.; Wisner-Lynch L.; Nevins M.L.; Nevins M.; Rasperini G.; Lynch S.E.; Giannobile W.V.                                                         | 2011 |
| Peri-Implant Diseases and Host Inflammatory Response Involving Mast Cells: A Review                                                                                                                      | Zizzi A.; Aspriello S.D.; Rubini C.; Goteri G.                                                                                                                   | 2011 |
| Proinflammatory cytokines (IL-1 $\beta$ and TNF- $\alpha$ ) and chemokines (IL-8 and MIP-1 $\alpha$ ) as markers of peri-implant tissue condition                                                        | Petković A.B.; Matić S.M.; Stamatović N.V.; Vojvodić D.V.; Todorović T.M.; Lazić Z.R.; Kozomara R.J.                                                             | 2010 |



|                                                                                                                                                                                                                                     |                                                                                                                                           |      |
|-------------------------------------------------------------------------------------------------------------------------------------------------------------------------------------------------------------------------------------|-------------------------------------------------------------------------------------------------------------------------------------------|------|
| Possible impact of inflammatory status on C-telopeptide pyridinoline cross-links of Type I collagen and osteocalcin levels around oral implants with peri-implantitis: A controlled clinical trial                                  | Tümer C.; Aksoy Y.; Güncü G.N.; Nohutcu R.M.; Kilinc K.; Tözüm T.F.                                                                       | 2008 |
| Infection at titanium implants with or without a clinical diagnosis of inflammation                                                                                                                                                 | Renvert S.; Roos-Jansåker A.-M.; Lindahl C.; Renvert H.; Rutger Persson G.                                                                | 2007 |
| IL-1RN gene polymorphism is associated with peri-implantitis                                                                                                                                                                        | Laine M.L.; Leonhardt Å.; Roos-Jansåker A.-M.; Peña A.S.; Van Winkelhoff A.J.; Winkel E.G.; Renvert S.                                    | 2006 |
| Retrospective assessment of clinical and microbiological factors affecting periimplant tissue conditions.                                                                                                                           | Rutar, A.; Lang, N. P.; Buser, D.; Burgin, W.; Mombelli, A.                                                                               | 2001 |
| Correlations between clinical parameters and interleukin-6 and interleukin-10 levels in saliva from totally edentulous patients with peri-implant disease.                                                                          | Liskmann, Stanislav; Vihalemm, Tiit; Salum, Olev; Zilmer, Kersti; Fischer, Krista; Zilmer, Mihkel                                         | 2006 |
| Microbiota of successful osseointegrated dental implants.                                                                                                                                                                           | Lee, K. H.; Maiden, M. F.; Tanner, A. C.; Weber, H. P.                                                                                    | 1999 |
| Human neutrophil collagenase MMP-8 in peri-implant sulcus fluid and its inhibition by clodronate.                                                                                                                                   | Teronen, O.; Kontinen, Y. T.; Lindqvist, C.; Salo, T.; Ingman, T.; Lauhio, A.; Ding, Y.; Santavirta, S.; Sorsa, T.                        | 1997 |
| A novel bionic design of dental implant for promoting its long-term success using nerve growth factor (NGF): utilizing nano-springs to construct a stress-cushioning structure inside the implant.                                  | He, Hao; Yao, Yang; Wang, Yanying; Wu, Yingying; Yang, Yang; Gong, Ping                                                                   | 2012 |
| Occult peri-implant oroantral fistulae: posterior maxillary peri-implantitis/sinusitis of zygomatic or dental implant origin. Treatment and prevention with bone morphogenetic protein-2/absorbable collagen sponge sinus grafting. | Jensen, Ole T.; Adams, Mark; Cottam, Jared R.; Ringeman, Jason                                                                            | 2013 |
| Bone formation and reosseointegration in peri-implantitis defects following surgical implantation of rhBMP-2.                                                                                                                       | Hanisch, O.; Tatakis, D. N.; Boskovic, M. M.; Rohrer, M. D.; Wikesjo, U. M.                                                               | 1997 |
| Single versus double flap approach in periodontal regenerative treatment.                                                                                                                                                           | Schincaglia, Gian Pietro; Hebert, Eric; Farina, Roberto; Simonelli, Anna; Trombelli, Leonardo                                             | 2015 |
| Immediate implant placement into fresh extraction sites with chronic periapical pathologic features combined with plasma rich in growth factors: preliminary results of single-cohort study.                                        | Del Fabbro, Massimo; Boggian, Cristiano; Taschieri, Silvio                                                                                | 2009 |
| Bone formation in peri-implant defects grafted with microparticles: a pilot animal experimental study.                                                                                                                              | Moest, Tobias; Koehler, Franz; Prechtel, Christopher; Schmitt, Christian; Watzek, Georg; Schlegel, Karl Andreas                           | 2014 |
| Spontaneous early exposure of submerged implants: I. Classification and clinical observations.                                                                                                                                      | Tal, H.                                                                                                                                   | 1999 |
| Soluble RANKL in crevicular fluid of dental implants: a pilot study.                                                                                                                                                                | Monov, Gabriel; Strbac, Georg D.; Baron, Monika; Kandler, Barbara; Watzek, Georg; Gruber, Reinhard                                        | 2006 |
| Effect of 308-nm excimer laser light on peri-implantitis-associated bacteria: an in vitro investigation.                                                                                                                            | Deppe, Herbert; Horsch, Hans-Henning; Schrod, Veit; Haczek, Cornelia; Miethke, Thomas                                                     | 2007 |
| Early colonization of non-submerged dental implants in patients with a history of advanced aggressive periodontitis.                                                                                                                | De Boever, Annemarie L.; De Boever, Jan A.                                                                                                | 2006 |
| Recombinant human bone morphogenetic protein-2 stimulation of bone formation around endosseous dental implants.                                                                                                                     | Cochran, D. L.; Schenk, R.; Buser, D.; Wozney, J. M.; Jones, A. A.                                                                        | 1999 |
| Bacterial colonisation of interior implant threads with and without sealing.                                                                                                                                                        | Proff, P.; Steinmetz, I.; Bayerlein, T.; Dietze, S.; Fanghanel, J.; Gedrange, T.                                                          | 2006 |
| Biological requirements for material integration.                                                                                                                                                                                   | O'Neal, R. B.; Sauk, J. J.; Somerman, M. J.                                                                                               | 1992 |
| [Effect of sustained release of recombinant rat insulin-like growth factor-1 from poly (lactide-CO-glycolide ) microspheres on bone formation in the peri-implant areas in Goto-Kakizaki rats with type 2 diabetes].                | Yu, Miao; Hui, Xin-Min; Wang, Feng; Zhang, Ning; Zhang, He-Peng; Song, Ying-Liang                                                         | 2010 |
| A new era in periodontal and periimplant regeneration: use of growth-factor enhanced matrices incorporating rhPDGF.                                                                                                                 | Lynch, Samuel E.; Wisner-Lynch, Leslie; Nevins, Myron; Nevins, Marc L.                                                                    | 2006 |
| [Evaluation of matrix metalloproteinase-9 and tissue inhibitor of metalloproteinase-1 levels in peri-implant sulcular fluid].                                                                                                       | Lu, Shao-heng; Liang, Xing; Xie, Zhi-gang; Zhang, Jing-yi; Xu, Ling; Sun, Hui-qiang                                                       | 2004 |
| Effect of platelet-rich plasma on the peri-implant bone response: an experimental study.                                                                                                                                            | Fontana, Sebastian; Olmedo, Daniel Gustavo; Linares, Jorge Alberto; Guglielmotti, Maria Beatriz; Crosa, Marta Elena                       | 2004 |
| FGF18 augments osseointegration of intra-medullary implants in osteopenic FGFR3(-/-) mice.                                                                                                                                          | Carli, A.; Gao, C.; Khayat-Kholghi, M.; Li, A.; Wang, H.; Ladel, C.; Harvey, E. J.; Henderson, J. E.                                      | 2012 |
| Isotropic micropatterned silica coatings on zirconia induce guided cell growth for dental implants.                                                                                                                                 | Pelaez-Vargas, A.; Gallego-Perez, D.; Magallanes-Perdomo, M.; Fernandes, M. H.; Hansford, D. J.; De Aza, A. H.; Pena, P.; Monteiro, F. J. | 2011 |
| [Early nutrition: the role of genetics and epigenetics].                                                                                                                                                                            | Liotto, N.; Miozzo, M.; Gianni, M. L.; Taroni, F.; Morlacchi, L.; Piemontese, P.; Roggero, P.; Mosca, F.                                  | 2009 |
| Prokineticin 1 mRNA expression in the endometrium of healthy women and in the eutopic endometrium of women with endometriosis.                                                                                                      | Tiberi, Federica; Tropea, Anna; Apa, Rosanna; Romani, Federica; Lanzone, Antonio; Marana, Riccardo                                        | 2010 |
| Peri-implant bone regeneration using recombinant human bone morphogenetic protein-2 in a canine model: a dose-response study.                                                                                                       | Tatakis, Dimitris N.; Koh, Alexander; Jin, Lisa; Wozney, John M.; Rohrer, Michael D.; Wikesjo, Ulf M. E.                                  | 2002 |
| Regulatory T-cells and immune tolerance in pregnancy: a new target for infertility treatment?                                                                                                                                       | Guerin, Leigh R.; Prins, Jelmer R.; Robertson, Sarah A.                                                                                   | 2009 |
| Bisphosphonate inhibits alveolar bone resorption in experimentally-induced peri-implantitis in dogs.                                                                                                                                | Shibutani, T.; Inuduka, A.; Horiki, I.; Luan, Q.; Iwayama, Y.                                                                             | 2001 |
| [Biofilms of the oral cavity. Formation, development and involvement in the onset of diseases related to bacterial plaque increase].                                                                                                | Bortolaia, C.; Sbordone, L.                                                                                                               | 2002 |
| Evaluation of implant osseointegration with different regeneration techniques in the treatment of bone defects around implants: an experimental study in a rabbit model.                                                            | Guerra, Isabel; Morais Branco, Fernando; Vasconcelos, Mario; Afonso, Americo; Figueiral, Helena; Zita, Raquel                             | 2011 |
| Stimulation of axonal sprouting by trophic factors immobilized within the wound core.                                                                                                                                               | Batchelor, Peter Egerton; Wills, Taryn Elizabeth; Hewa, Ajith Pedru; Porritt, Michelle Julie; Howells, David William                      | 2008 |

|                                                                                                                                                                                                                                                             |                                                                                                                                                                                                                  |      |
|-------------------------------------------------------------------------------------------------------------------------------------------------------------------------------------------------------------------------------------------------------------|------------------------------------------------------------------------------------------------------------------------------------------------------------------------------------------------------------------|------|
| Treatment of the infected implant site using platelet-rich plasma.                                                                                                                                                                                          | Petrungaro, Paul S.                                                                                                                                                                                              | 2002 |
| Mesenchymal stem cell transplantation to promote bone healing.                                                                                                                                                                                              | Gao, Chan; Seuntjens, Jan; Kaufman, Gabriel N.; Tran-Khanh, Nicolas; Butler, Alison; Li, Ailian; Wang, Huiifen; Buschmann, Michael D.; Harvey, Edward J.; Henderson, Janet E.                                    | 2012 |
| Crevicular fluid enzymes from endosseous dental implants and natural teeth.                                                                                                                                                                                 | Boutros, S. M.; Michalowicz, B. S.; Smith, Q. T.; Aeppli, D. M.                                                                                                                                                  | 1996 |
| Evaluation of implants coated with recombinant human bone morphogenetic protein-2 and vacuum-dried using the critical-size supraalveolar peri-implant defect model in dogs.                                                                                 | Decker, John F.; Lee, Jaebum; Cortella, Carlo Alberto; Polimeni, Giuseppe; Rohrer, Michael D.; Wozney, John M.; Hall, Jan; Susin, Cristiano; Wikesjo, Ulf M. E.                                                  | 2010 |
| Induction of selective blood-tumor barrier permeability and macromolecular transport by a biostable kinin B1 receptor agonist in a glioma rat model.                                                                                                        | Cote, Jerome; Bovenzi, Veronica; Savard, Martin; Dubuc, Celen; Fortier, Audrey; Neugebauer, Witold; Tremblay, Luc; Muller-Esterl, Werner; Tsanacis, Ana-Maria; Lepage, Martin; Fortin, David; Gobeil, Fernand Jr | 2012 |
| Effect of dynamic three-dimensional culture on osteogenic potential of human periodontal ligament-derived mesenchymal stem cells entrapped in alginate microbeads.                                                                                          | Vecchiattini, R.; Penolazzi, L.; Lambertini, E.; Angelozzi, M.; Morganti, C.; Mazzitelli, S.; Trombelli, L.; Nastruzzi, C.; Piva, R.                                                                             | 2015 |
| Rapid quantification of histamine in human psoriatic plaques using microdialysis and ultra high performance liquid chromatography with fluorescence detection.                                                                                              | Guihen, Elizabeth; Ho, Wen Lyn; Hogan, Anna-Marie; O'Connell, Marie-Louise; Leahy, Martin J.; Ramsay, Bart; O'Connor, William T.                                                                                 | 2012 |
| Mandibular defect reconstruction using three-dimensional polycaprolactone scaffold in combination with platelet-rich plasma and recombinant human bone morphogenetic protein-2: de novo synthesis of bone in a single case.                                 | Schuckert, Karl-Heinz; Jopp, Stefan; Teoh, Swee-Hin                                                                                                                                                              | 2009 |
| Alveolar ridge augmentation using implants coated with recombinant human bone morphogenetic protein-7 (rhBMP-7/rhOP-1): histological observations.                                                                                                          | Susin, Cristiano; Qahash, Mohammed; Polimeni, Giuseppe; Lu, Ping Hung; Prasad, Hari S.; Rohrer, Michael D.; Hall, Jan; Wikesjo, Ulf M. E.                                                                        | 2010 |
| Bone regeneration after peri-implant care with the CO2 laser: a fluorescence microscopy study.                                                                                                                                                              | Stubinger, Stefan; Henke, Julia; Donath, Karl; Deppe, Herbert                                                                                                                                                    | 2005 |
| [The maxilla--a poor implant site?].                                                                                                                                                                                                                        | Ekert, O.; Kunkel, M.; Wegener, J.; Wagner, W.                                                                                                                                                                   | 1999 |
| Utility of intracerebral theta burst electrical stimulation to attenuate interhemispheric inhibition and to promote motor recovery after cortical injury in an animal model.                                                                                | Barry, Melissa D.; Boddington, Laura J.; Igelstrom, Kajsia M.; Gray, Jason P.; Shemmell, Jon; Tseng, Kuei Y.; Oorschot, Dorothy E.; Reynolds, John N. J.                                                         | 2014 |
| Low pulse energy Nd:YAG laser irradiation exerts a biostimulative effect on different cells of the oral microenvironment: "An in vitro study"                                                                                                               | Chellini F.; Sassoli C.; Nosi D.; Deleda C.; Tonelli P.; Zecchi-Orlandini S.; Formigli L.; Giannelli M.                                                                                                          | 2010 |
| Evaluation of implants coated with rhBMP-2 using two different coating strategies: a critical-size supraalveolar peri-implant defect study in dogs                                                                                                          | Lee J.; Decker J.F.; Polimeni G.; Cortella C.A.; Rohrer M.D.; Wozney J.M.; Hall J.; Susin C.; Wikesjö U.M.                                                                                                       | 2010 |
| Bacterial colonization of oral implants from nondental sources                                                                                                                                                                                              | Emrani J.; Chee W.; Slots J.                                                                                                                                                                                     | 2009 |
| The clinical, microbial, and host response characteristics of the failing implant                                                                                                                                                                           | Salcetti, JM; Moriarty, JD; Cooper, LF; Smith, FW; Collins, JG; Socransky, SS; Offenbacher, S                                                                                                                    | 1997 |
| IL-1 gene polymorphism and smoking as risk factors for peri-implant bone loss in a well-maintained population                                                                                                                                               | Feloutzis, A; Lang, NP; Tonetti, MS; Burgin, W; Bragger, U; Buser, D; Duff, GW; Kornman, KS                                                                                                                      | 2003 |
| Interleukin-1 beta, tumor necrosis factor-alpha levels and neutrophil elastase activity in peri-implant crevicular fluid - Correlation with clinical parameters and effect of smoking                                                                       | Ataoglu, H; Alptekin, NO; Haliloglu, S; Gursel, M; Ataoglu, T; Serpek, B; Durmus, E                                                                                                                              | 2002 |
| Osseointegrated implants in patients treated for generalized severe adult periodontitis. An interim report                                                                                                                                                  | Mengel, R; Stelzel, M; Hasse, C; FloresdeJacoby, L                                                                                                                                                               | 1996 |
| Laminin-5 gamma 2-chain and collagenase-2 (MMP-8) in human peri-implant sulcular fluid                                                                                                                                                                      | Kivela-Rajamaki, MF; Teronen, OP; Maisi, P; Husa, V; Tervahartala, TI; Pirila, EM; Salo, TA; Mellanen, L; Sorsa, TA                                                                                              | 2003 |
| Analysis of the association of IL1B (C+3954T) and IL1RN (intron 2) polymorphisms with dental implant loss in a Brazilian population                                                                                                                         | Montes, Claudia Cristina; Alvim-Pereira, Fabiano; de Castilhos, Bruno Borges; Lopes Sakurai, Marcos Luciano; Olandoski, Marcia; Trevilatto, Paula Cristina                                                       | 2009 |
| Interleukins IL-6, IL-8, IL-10, IL-12 and periimplant disease. An update                                                                                                                                                                                    | Candel-Marti, Maria-Eugenia; Flichy-Fernandez, Antonio-Juan; Alegre-Domingo, Teresa; Ata-Ali, Javier; Penarrocha-Diago, Maria A.                                                                                 | 2011 |
| Analysis of the possible impact of inflammation severity and early and delayed loading on nitric oxide metabolism around dental implants                                                                                                                    | Tozum, TF; Turkyilmaz, I; Yamalik, N; Tumer, C; Kilinc, A; Kilinc, K; Karabulut, E; Eratalay, K                                                                                                                  | 2005 |
| Effect of intracrevicular restoration margins peri-implant health: Clinical, biochemical, and microbiologic findings around esthetic implants up to 9 years                                                                                                 | Giannopoulou, C; Bernard, JP; Buser, D; Carrel, A; Belser, UC                                                                                                                                                    | 2003 |
| The Influence of Individual Bone Patterns on Pen-implant Bone Loss: Preliminary Report from a 3-year Randomized Clinical and Histologic Trial in Patients Treated with Implants Restored with Matching-Diameter Abutments or the Platform-Switching Concept | Canullo, Luigi; Lannello, Giuliano; Goetz, Werner                                                                                                                                                                | 2011 |
| Could cytokine levels in the peri-implant crevicular fluid be used to distinguish between healthy implants and implants with peri-implantitis? A systematic review                                                                                          | Duarte, P. M.; Serrao, C. R.; Miranda, T. S.; Zanatta, L. C. S.; Bastos, M. F.; Faveri, M.; Figueiredo, L. C.; Feres, M.                                                                                         | 2016 |
| Necessity of Keratinized Tissues for Dental Implants: A Clinical, Immunological, and Radiographic Study                                                                                                                                                     | Askin, Sezen Buyukozdemir; Berker, Ezel; Akincibay, Hakan; Uysal, Serdar; Erman, Baran; Tezcan, Ilhan; Karabulut, Erdem                                                                                          | 2015 |
| IL1 gene polymorphisms and unsuccessful dental implants                                                                                                                                                                                                     | Vaz, P.; Gallas, M. M.; Braga, A. C.; Sampaio-Fernandes, J. C.; Felino, A.; Tavares, P.                                                                                                                          | 2012 |
| Pro-inflammatory cytokines at zirconia implants and teeth. A cross-sectional assessment                                                                                                                                                                     | Cionca, Norbert; Hashim, Dena; Cancela, Jose; Giannopoulou, Catherine; Mombelli, Andrea                                                                                                                          | 2016 |
| Expression of IL-6, IL-10, IL-17 and IL-33 in the peri-implant crevicular fluid of patients with peri-implant mucositis and peri-implantitis                                                                                                                | Severino, Viviane Oliveira; Beghini, Marcela; de Araujo, Marcia Fernandes; Ribeiro de Melo, Marcelo Luiz; Miguel, Camila                                                                                         | 2016 |

|                                                                                                                                                                                   |                                                                                                                                                                                                                                                                                     |      |
|-----------------------------------------------------------------------------------------------------------------------------------------------------------------------------------|-------------------------------------------------------------------------------------------------------------------------------------------------------------------------------------------------------------------------------------------------------------------------------------|------|
|                                                                                                                                                                                   | Botelho; Rodrigues, Wellington Francisco; de Lima Pereira, Sanivia Aparecida                                                                                                                                                                                                        |      |
| How frequent does peri-implantitis occur? A systematic review and meta-analysis                                                                                                   | Rakic, Mia; Galindo-Moreno, Pablo; Monje, Alberto; Radovanovic, Sandro; Wang, Hom-Lay; Cochran, David; Sculean, Anton; Canullo, Luigi                                                                                                                                               | 2018 |
| Biomarkers Associated With Periimplant Diseases                                                                                                                                   | Li, Jeff Yuanjun; Wang, Hom-Lay                                                                                                                                                                                                                                                     | 2014 |
| Correlation of peri-implant health and aspartate aminotransferase levels: A cross-sectional clinical study                                                                        | Fiorellini, JP; Nevins, ML; Sekler, J; Chung, A; Oringer, RJ                                                                                                                                                                                                                        | 2000 |
| Effects of smoking on salivary C-telopeptide pyridinoline cross-links of type I collagen and osteocalcin levels                                                                   | Gurlek, Onder; Lappin, David F.; Buduneli, Nurcan                                                                                                                                                                                                                                   | 2009 |
| Evaluation of mammalian and bacterial cell activity on titanium surface coated with dicationic imidazolium-based ionic liquids                                                    | Gindri, Isabelle M.; Palmer, Kelli L.; Siddiqui, Danyal A.; Aghyarian, Shant; Frizzo, Clarissa P.; Martins, Marcos A. P.; Rodrigues, Danieli C.                                                                                                                                     | 2016 |
| Vertical bone augmentation induced by ultrathin hydroxyapatite sputtered coated mini titanium implants in a rabbit calvaria model                                                 | Wang, Xin; Zakaria, Osama; Madi, Marwa; Hao, Jia; Chou, Joshua; Kasugai, Shohei                                                                                                                                                                                                     | 2015 |
| Wound models for periodontal and bone regeneration: the role of biologic research                                                                                                 | Sculean, Anton; Chapple, Iain L. C.; Giannobile, William V.                                                                                                                                                                                                                         | 2015 |
| Comparison of pro-inflammatory cytokines and bone metabolism mediators around titanium and zirconia dental implant abutments following a minimum of 6 months of clinical function | Barwacz, Christopher A.; Brogden, Kim A.; Stanford, Clark M.; Dawson, Deborah V.; Recker, Erica N.; Blanchette, Derek                                                                                                                                                               | 2015 |
| Bone Loss Biomarkers Evaluation as an Early Diagnosis and Prognostic Factor of Peri-implantitis                                                                                   | Bartok, Francisc Florin; Forna, Norina Consuela                                                                                                                                                                                                                                     | 2016 |
| Correlation between peri-implant sulcular fluid rate and expression of collagenase2 (MMP8)                                                                                        | Janska, Emilia; Mohr, Barbara; Wahl, Gerhard                                                                                                                                                                                                                                        | 2016 |
| Fluid Exudates From Inflamed Bone-Anchored Hearing Aids Demonstrate Elevated Levels of Cytokines and Biomarkers of Tissue and Bone Metabolism                                     | Grant, Melissa M.; Monksfield, Peter; Proops, David; Brine, Maxine; Addison, Owen; Sammons, Rachel L.; Matthews, John B.; Reid, Andrew; Chapple, Iain L. C.                                                                                                                         | 2010 |
| Titanium Activates the DNA Damage Response Pathway in Oral Epithelial Cells: A Pilot Study                                                                                        | del Amo, Fernando Suarez-Lopez; Rudek, Ivan; Wagner, Vivian Petersen; Martins, Manoela D.; O'Valle, Francisco; Galindo-Moreno, Pablo; Giannobile, William V.; Wang, Hom-Lay; Castilho, Rogerio M.                                                                                   | 2017 |
| Implants with an Oxidized Surface Placed Predominately in Soft Bone Quality and Subjected to Immediate Occlusal Loading: Results from an 11-Year Clinical Follow-Up               | Glauser, Roland                                                                                                                                                                                                                                                                     | 2016 |
| Expression of antimicrobial peptides and interleukin-8 during early stages of inflammation: An experimental gingivitis study                                                      | Dommisch, H.; Staufienbiel, I.; Schulze, K.; Stiesch, M.; Winkel, A.; Fimmers, R.; Dommisch, J.; Jepsen, S.; Miosge, N.; Adam, K.; Eberhard, J.                                                                                                                                     | 2015 |
| Materials Used for Diagnostic and Treatments in Dental Practice                                                                                                                   | Fratila, Dragos; Agop-Forna, Dorian; Forna, Norina Consuela                                                                                                                                                                                                                         | 2015 |
| Effects of alendronate on the peri-implant bone in rats                                                                                                                           | Oh, K. C.; Moon, H. S.; Lee, J. H.; Park, Y. B.; Kim, J-H                                                                                                                                                                                                                           | 2015 |
| The role of macrophage polarization on fibroblast behavior-an in vitro investigation on titanium surfaces                                                                         | Wang, Xuzhu; Wang, Yulan; Bosshardt, Dieter D.; Miron, Richard J.; Zhang, Yufeng                                                                                                                                                                                                    | 2018 |
| What is the Impact of Epstein-Barr Virus in Peri-implant Infection?                                                                                                               | Canullo, Luigi; Pesce, Paolo; Botticelli, Daniele; Covani, Ugo; Jankovic, Sasha; Jovanovic, Tanja; Rakic, Mia                                                                                                                                                                       | 2018 |
| Polymorphisms of IL-10(-1082) and RANKL (-438) Genes and the Failure of Dental Implants                                                                                           | Ribeiro, Rodrigo; Melo, Rayanne; Neto, Pedro Tortamano; Vajgel, Andre; Eleuterio Souza, Paulo Roberto; Cimoos, Renata                                                                                                                                                               | 2017 |
| Macrophage behavior and interplay with gingival fibroblasts cultured on six commercially available titanium, zirconium, and titanium-zirconium dental implants                    | Wang, Yulan; Zhang, Yufeng; Sculean, Anton; Bosshardt, Dieter D.; Miron, Richard J.                                                                                                                                                                                                 | 2019 |
| Metal Nanoparticles Released from Dental Implant Surfaces: Potential Contribution to Chronic Inflammation and Peri-Implant Bone Loss                                              | Bressan, Eriberto; Ferroni, Letizia; Gardin, Chiara; Bellin, Gloria; Sbricoli, Luca; Sivoletta, Stefano; Brunello, Giulia; Schwartz-Arad, Deborah; Mijiritsky, Eitan; Penarrocha, Miguel; Penarrocha, David; Taccioli, Cristian; Tatullo, Marco; Piattelli, Adriano; Zavan, Barbara | 2019 |
| TiO <sub>2</sub> nanotubes modified with Au nanoparticles for visible-light enhanced antibacterial and anti-inflammatory capabilities                                             | Xu, Wenzhou; Qi, Manlin; Li, Xue; Liu, Xuxu; Wang, Lin; Yu, Wanqi; Liu, Min; Lan, A.; Zhou, Yanmin; Song, Yanyan                                                                                                                                                                    | 2019 |
| The evaluation of peri-implant sulcus fluid osteocalcin, osteopontin, and osteonectin levels in peri-implant diseases                                                             | Cakal, Oya Turkoglu; Efeoglu, Candan; Bozkurt, Emir                                                                                                                                                                                                                                 | 2018 |
| Cytokine Levels and Human Herpesviruses in Saliva from Clinical Periodontal Healthy Subjects with Peri-Implantitis: A Case-Control Study                                          | Marques Filho, Jaime S.; Gobara Jr, Jorge; da Silva Salomao, Gustavo Vargas; Sumita, Laura M.; Shibli, Jamil A.; Viana, Renato G.; Schwartz Filho, Humberto O.; Pannuti, Claudio Sergio; Braz-Silva, Paulo Henrique; Pallos, Debora                                                 | 2018 |
| Evaluation of cell activation promoted by tantalum and tantalum oxide coatings deposited by reactive DC magnetron sputtering                                                      | Moreira, Hugo; Costa-Barbosa, Augusto; Marques, Sandra Mariana; Sampaio, Paula; Carvalho, Sandra                                                                                                                                                                                    | 2017 |
| Surgical Treatment of Advanced Peri-Implantitis With a Dual Augmentation Technique: A Report of Two Cases With 15-Month Follow-Up                                                 | Najafi, Babak; Patel, Vaishaliben; Deutsch, Roberta G.; Drew, Howard J.; Cappetta, Emil G.                                                                                                                                                                                          | 2017 |
| STUDY REGARDING THE ROLES OF HUMAN BETA-DEFENSIN 3 IN MONITORING OF PERI-IMPLANTITIS                                                                                              | Al Jaboobi, Afef; Caraiane, Aureliana; Grigorian, Mircea; Badea, Victoria                                                                                                                                                                                                           | 2016 |
| Peri-implant crevicular fluid levels of cathepsin-K, RANKL, and OPG around standard, short, and mini dental implants after prosthodontic loading                                  | Alan, Raif; Marakoglu, Ismail; Haliloglu, Seyfullah                                                                                                                                                                                                                                 | 2015 |
| DENTAL IMPLANT SITES IN HEALTHY VERSUS DIABETIC SUBJECTS: A TWO-YEAR CLINICAL AND BACTERIOLOGICAL ASSESSMENT                                                                      | Bignozzi, I.; Ciobanu, G.; Quaranta, A.; Pompa, G.                                                                                                                                                                                                                                  | 2013 |

|                                                                                                                                                                                                       |                                                                                                                                                                                                                                                                  |      |
|-------------------------------------------------------------------------------------------------------------------------------------------------------------------------------------------------------|------------------------------------------------------------------------------------------------------------------------------------------------------------------------------------------------------------------------------------------------------------------|------|
| IL-1 POLYMORPHISMS MAY PREDICT UNSUCCESSFUL DENTAL IMPLANTS?                                                                                                                                          | Vaz, Paula; Braga, Ana; Sampaio-Fernandes, Joao; Tavares, Maria; Felino, Antonio                                                                                                                                                                                 | 2012 |
| The effect of orally administered probiotic Lactobacillus reuteri-containing tablets in peri-implant mucositis: a double-blind randomized controlled trial.                                           | Flichy-Fernandez, A. J.; Ata-Ali, J.; Alegre-Domingo, T.; Candel-Marti, E.; Ata-Ali, F.; Palacio, J. R.; Penarrocha-Diago, M.                                                                                                                                    | 2015 |
| Biomarkers and Bacteria Around Implants and Natural Teeth in the Same Individuals.                                                                                                                    | Gurlek, Onder; Gumus, Pinar; Nile, Christopher J.; Lappin, David F.; Buduneli, Nurcan                                                                                                                                                                            | 2017 |
| Prediction of individual implant bone levels and the existence of implant "phenotypes".                                                                                                               | Papantonopoulos, Georgios; Gogos, Christos; Housos, Efthymios; Bountis, Tassos; Loos, Bruno G.                                                                                                                                                                   | 2017 |
| Analysis of CD15, CD57 and HIF-1alpha in biopsies of patients with peri-implantitis.                                                                                                                  | de Araujo, Marcia Fernandes; Etchebehere, Renata Margarida; de Melo, Marcelo Luiz Ribeiro; Beghini, Marcela; Severino, Viviane Oliveira; de Castro Cobo, Eliangela; Rocha Rodrigues, Denise Bertulucci; de Lima Pereira, Sanivia Aparecida                       | 2017 |
| Peri-implant parameters and C-reactive protein levels among patients with different obesity levels.                                                                                                   | Vohra, Fahim; Alkhudairy, Fahad; Al-Kharaif, Abdulaziz A.; Akram, Zohaib; Javed, Fawad                                                                                                                                                                           | 2018 |
| Protein biomarkers and microbial profiles in peri-implantitis.                                                                                                                                        | Wang, Hom-Lay; Garaicoa-Pazmino, Carlos; Collins, Amy; Ong, Hwen-Sei; Chudri, Rini; Giannobile, William V.                                                                                                                                                       | 2016 |
| Peri-implant mucositis.                                                                                                                                                                               | Heitz-Mayfield, Lisa J. A.; Salvi, Giovanni E.                                                                                                                                                                                                                   | 2018 |
| Peri-implant mucositis.                                                                                                                                                                               | Heitz-Mayfield, Lisa J. A.; Salvi, Giovanni E.                                                                                                                                                                                                                   | 2018 |
| The role of lasers in the treatment of peri-implant diseases: A review.                                                                                                                               | Alshehri, Fahad Ali                                                                                                                                                                                                                                              | 2016 |
| Peri-Implant Sulcus Fluid (PISF) Matrix Metalloproteinase (MMP) -8 Levels in Peri-Implantitis.                                                                                                        | Thierbach, Rene; Maier, Kurt; Sorsa, Timo; Mantyla, Paivi                                                                                                                                                                                                        | 2016 |
| Assessment of interleukin-1beta, interleukin-6, and tumor necrosis factor-Alpha levels in the peri-implant sulcular fluid among waterpipe (narghile) smokers and never-smokers with peri-implantitis. | Abduljabbar, Tariq; Akram, Zohaib; Vohra, Fahim; Warnakulasuriya, Saman; Javed, Fawad                                                                                                                                                                            | 2018 |
| Clinical and radiographic peri-implant parameters and proinflammatory cytokine levels among cigarette smokers, smokeless tobacco users, and nontobacco users.                                         | Akram, Zohaib; Vohra, Fahim; Bukhari, Ishfaq A.; Sheikh, Saeed A.; Javed, Fawad                                                                                                                                                                                  | 2018 |
| Host-derived biomarkers at teeth and implants in partially edentulous patients. A                                                                                                                     | Ramseier, Christoph A.; Eick, Sigrun; Bronnimann, Claudia; Buser, Daniel; Bragger, Urs; Salvi, Giovanni E.                                                                                                                                                       | 2016 |
| Comparison between inflammation-related markers in peri-implant crevicular fluid and clinical parameters during osseointegration in edentulous jaws.                                                  | Bielemann, Amalia M.; Marcello-Machado, Raissa M.; Leite, Fabio Renato Manzolli; Martinho, Frederico Canato; Chagas-Junior, Otacilio Luiz; Antoninha Del Bel Cury, Altair; Faot, Fernanda                                                                        | 2018 |
| The pathology of bone tissue during peri-implantitis.                                                                                                                                                 | Schminke, B.; Vom Orde, F.; Gruber, R.; Schliephake, H.; Burgers, R.; Miosge, N.                                                                                                                                                                                 | 2015 |
| Establishment of Epithelial Attachment on Titanium Surface Coated with Platelet Activating Peptide.                                                                                                   | Sugawara, Shiho; Maeno, Masahiko; Lee, Cliff; Nagai, Shigemitsu; Kim, David M.; Da Silva, John; Nagai, Masazumi; Kondo, Hisatomo                                                                                                                                 | 2016 |
| An Exploratory Case-Control Study on the Impact of IL-1 Gene Polymorphisms on Early Implant Failure.                                                                                                  | Cosyn, Jan; Christiaens, Veronique; Koningsveld, Vincent; Coucke, Paul J.; De Coster, Peter; De Paepe, Anne; De Bruyn, Hugo                                                                                                                                      | 2016 |
| Diagnosing peri-implant disease using the tongue as a 24/7 detector.                                                                                                                                  | Ritzer, J.; Luhmann, T.; Rode, C.; Pein-Hackelbusch, M.; Immohr, I.; Schedler, U.; Thiele, T.; Stubinger, S.; Rechenberg, B. V.; Waser-Althaus, J.; Schlottig, F.; Merli, M.; Dawe, H.; Karpisek, M.; Wyrwa, R.; Schnabelrauch, M.; Meinel, L.                   | 2017 |
| Peri-implantitis: a complex condition with non-linear characteristics.                                                                                                                                | Papantonopoulos, Georgios; Gogos, Christos; Housos, Efthymios; Bountis, Tassos; Loos, Bruno G.                                                                                                                                                                   | 2015 |
| Salivary Concentration of Oxidative Stress Biomarkers in a Group of Patients with Peri-Implantitis: A Transversal Study.                                                                              | Sanchez-Siles, Mariano; Lucas-Azorin, Javier; Salazar-Sanchez, Noemi; Carbonell-Meseguer, Luis; Camacho-Alonso, Fabio                                                                                                                                            | 2016 |
| Calprotectin and cross-linked N-telopeptides of type I collagen levels in crevicular fluid from implant sites with peri-implant diseases: a pilot study.                                              | Sakamoto, Eijiro; Kido, Rie; Tomotake, Yoritoki; Naitou, Yoshihito; Ishida, Yuichi; Kido, Jun-Ichi                                                                                                                                                               | 2018 |
| Clinical peri-implant parameters and inflammatory cytokine profile among smokers of cigarette, e-cigarette, and waterpipe.                                                                            | AlQahtani, Mohammed Ayedh; Alayad, Abdullah Saeed; Alshihri, Abdulmonem; Correa, Fernanda Oliveira Bello; Akram, Zohaib                                                                                                                                          | 2018 |
| The etiology of hard- and soft-tissue deficiencies at dental implants: A narrative review.                                                                                                            | Hammerle, Christoph H. F.; Tarnow, Dennis                                                                                                                                                                                                                        | 2018 |
| The etiology of hard- and soft-tissue deficiencies at dental implants: A narrative review.                                                                                                            | Hammerle, Christoph H. F.; Tarnow, Dennis                                                                                                                                                                                                                        | 2018 |
| Impact of heavy smoking on the clinical, microbiological and immunological parameters of patients with dental implants: a prospective cross-sectional study.                                          | Ata-Ali, Javier; Flichy-Fernandez, Antonio Juan; Alegre-Domingo, Teresa; Ata-Ali, Fadi; Penarrocha-Diago, Miguel                                                                                                                                                 | 2016 |
| The severity of human peri-implantitis lesions correlates with the level of submucosal microbial dysbiosis.                                                                                           | Kroger, Annika; Hulsmann, Claudia; Fickl, Stefan; Spinell, Thomas; Huttig, Fabian; Kaufmann, Frederic; Heimbach, Andre; Hoffmann, Per; Enkling, Norbert; Renvert, Stefan; Schwarz, Frank; Demmer, Ryan T.; Papapanou, Panos N.; Jepsen, Soren; Kerschull, Moritz | 2018 |
| Clinical and Radiographic Peri-Implant Parameters and Whole Salivary Interleukin-1beta and Interleukin-6 Levels among Type-2 Diabetic and Nondiabetic Patients with and without Peri-Implantitis.     | Al-Askar, Mansour; Ajlan, Sumaiah; Alomar, Nuha; Al-Daghri, Nasser M.                                                                                                                                                                                            | 2018 |
| Diagnostic accuracy of clinical parameters to monitor peri-implant conditions: A matched case-control study.                                                                                          | Monje, Alberto; Caballe-Serrano, Jordi; Nart, Jose; Penarrocha, David; Wang, Hom-Lay; Rakic, Mia                                                                                                                                                                 | 2018 |
| Volumetric Analysis of Gingival Crevicular Fluid and Peri-Implant Sulcus Fluid in Healthy and Diseased Sites: A Cross-Sectional Split-Mouth Pilot Study.                                              | Bevilacqua, Lorenzo; Biasi, Matteo De; Lorenzon, Maria Giulia; Frattini, Costanza; Angerame, Daniele                                                                                                                                                             | 2016 |

|                                                                                                                                                                                                               |                                                                                                                                                                                    |      |
|---------------------------------------------------------------------------------------------------------------------------------------------------------------------------------------------------------------|------------------------------------------------------------------------------------------------------------------------------------------------------------------------------------|------|
| Bone and soft tissue outcomes, risk factors, and complications of implant-supported prostheses: 5-Years RCT with different abutment types and loading protocols.                                              | Gothberg, Catharina; Grondahl, Kerstin; Omar, Omar; Thomsen, Peter; Slotte, Christer                                                                                               | 2018 |
| Proinflammatory cytokine levels and peri-implant parameters among cigarette smokers, individuals vaping electronic cigarettes, and non-smokers.                                                               | ArRejaie, Aws S.; Al-Aali, Khulud Abdulrahman; Alrabiah, Mohammed; Vohra, Fahim; Mokeem, Sameer A.; Basunbul, Ghadeer; Alrahlah, Ali; Abduljabbar, Tariq                           | 2019 |
| Biological and immunotoxicity evaluation of antimicrobial peptide-loaded coatings using a layer-by-layer process on titanium.                                                                                 | Shi, Jue; Liu, Yu; Wang, Ying; Zhang, Jing; Zhao, Shifang; Yang, Guoli                                                                                                             | 2015 |
| Significant Enrichment and Diversity of the Staphylococcal Arginine Catabolic Mobile Element ACME in Staphylococcus epidermidis Isolates From Subgingival Peri-implantitis Sites and Periodontal Pockets.     | O'Connor, Aoife M.; McManus, Brenda A.; Kinnevey, Peter M.; Brennan, Grainne I.; Fleming, Tanya E.; Cashin, Phillipa J.; O'Sullivan, Michael; Polyzois, Ioannis; Coleman, David C. | 2018 |
| Association of Global DNA Methylation to Titanium and Peri-Implantitis: A Case-Control Study.                                                                                                                 | Daubert, D. M.; Pozhitkov, A. E.; Safioti, L. M.; Kotsakis, G. A.                                                                                                                  | 2019 |
| Impact of a triclosan-containing toothpaste during the progression of experimental peri-implant mucositis: Clinical parameters and local pattern of osteo-immunoinflammatory mediators in peri-implant fluid. | Ribeiro, Fernanda V.; Casati, Marcio Z.; Casarin, Renato C.; Correa, Monica G.; Cirano, Fabiano R.; Negri, Brenno M.; Pimentel, Suzana P.                                          | 2018 |
| Evaluation of gingival crevicular fluid and peri-implant crevicular fluid levels of sclerostin, TWEAK, RANKL and OPG.                                                                                         | Yakar, Nil; Guncu, Guliz N.; Akman, Abdullah C.; Pinar, Asli; Karabulut, Erdem; Nohutcu, Rahime M.                                                                                 | 2019 |
| Bone loss biomarkers associated with peri-implantitis. A cross-sectional study.                                                                                                                               | Rakic, Mia; Lekovic, Vojislav; Nikolic-Jakoba, Natasa; Vojvodic, Danilo; Petkovic-Curcin, Aleksandra; Sanz, Mariano                                                                | 2013 |
| VEGF, Microvessel Density, and CD44 as Inflammation Markers in Peri-implant Healthy Mucosa, Peri-implant Mucositis, and Peri-implantitis: Impact of Age, Smoking, PPD, and Obesity.                           | Lucarini, Guendalina; Zizzi, Antonio; Rubini, Corrado; Ciolino, Francesco; Aspriello, Simone Domenico                                                                              | 2019 |
| Anti-infective therapy of peri-implantitis with adjunctive local drug delivery or photodynamic therapy: 12-month outcomes of a randomized controlled clinical trial.                                          | Bassetti, Mario; Schar, Dorothee; Wicki, Beat; Eick, Sigrun; Ramseier, Christoph A.; Arweiler, Nicole B.; Sculean, Anton; Salvi, Giovanni E.                                       | 2014 |
| Microbiological aspects of human mandibular subperiosteal dental implants.                                                                                                                                    | Rams, Thomas E.; Balkin, Burton E.; Roberts, Thomas W.; Molzan, Arthur K.                                                                                                          | 2013 |
| Interleukin-1beta and interleukin-6 expression and gene polymorphisms in subjects with peri-implant disease.                                                                                                  | Melo, Rafaela F.; Lopes, Beatriz M. V.; Shibli, Jamil A.; Marcantonio, Elcio Jr; Marcantonio, Rosemary Adriana C.; Galli, Gloria M. Thompson                                       | 2012 |
| Would nitric oxide be an effective marker for earlier stages of peri-implant disease? An analysis in human peri-implant sulcular fluid.                                                                       | Vieira, Andreia Espindola; Moura, Camilla Christian Gomes; de Souza, Maria Aparecida; Zanetta-Barbosa, Darceny; Dechichi, Paula                                                    | 2013 |
| Successful management of peri-implantitis with a regenerative approach: a consecutive series of 51 treated implants with 3- to 7.5-year follow-up.                                                            | Froum, Stuart J.; Froum, Scott H.; Rosen, Paul S.                                                                                                                                  | 2012 |
| Relationship between interleukin-1 genotype and peri-implantitis: a literature review.                                                                                                                        | Andreiotelli, Marina; Koutayas, Spiridon-Oumvertos; Madianos, Phoebus N.; Strub, Jorg-Rudolf                                                                                       | 2008 |
| Influence of antibiotic prophylaxis on the stability of orthodontic microimplants: A pilot randomized controlled trial.                                                                                       | Lyczek, Jan; Kawala, Beata; Antoszewska-Smith, Joanna                                                                                                                              | 2018 |
| A controlled clinical exploratory study on genetic markers for peri-implantitis.                                                                                                                              | Hall, Jan; Britse, Anna Ornhall; Jemt, Torsten; Friberg, Bertil                                                                                                                    | 2011 |
| Receptor activator of nuclear factor kappa B ligand (RANKL) levels in peri-implant crevicular fluid.                                                                                                          | Sarlati, Fatemeh; Sattari, Mandana; Gazar, Ali Ghorbani; Rafsenjani, Ali Nabavizadeh                                                                                               | 2010 |
| Osteoprotegerin levels in peri-implant crevicular fluid.                                                                                                                                                      | Arikan, Fatih; Buduneli, Nurcan; Kutukculer, Necil                                                                                                                                 | 2008 |
| Correlation of peri-implant health and myeloperoxidase levels: a cross-sectional clinical study.                                                                                                              | Liskmann, Stanislav; Zilmer, Mihkel; Vihalemm, Tiit; Salum, Olev; Fischer, Krista                                                                                                  | 2004 |
| Effect of anti-infective mechanical therapy on clinical parameters and cytokine levels in human peri-implant diseases.                                                                                        | Duarte, Poliana Mendes; de Mendonca, Adriana Cutrim; Maximo, Maria Beatriz Braz; Santos, Vanessa Renata; Bastos, Marta Ferreira; Nociti, Francisco Humberto                        | 2009 |
| Transforming growth factor-beta 1 expression in the peri-implant soft tissues of healthy and failing dental implants.                                                                                         | Cornelini, Roberto; Rubini, Corrado; Fioroni, Massimiliano; Favero, Gian Antonio; Strocchi, Rita; Piattelli, Adriano                                                               | 2003 |
| Concentration- and time-dependent response of human gingival fibroblasts to fibroblast growth factor 2 immobilized on titanium dental implants.                                                               | Ma, Qianli; Wang, Wei; Chu, Paul K.; Mei, Shenglin; Ji, Kun; Jin, Lei; Zhang, Yumei                                                                                                | 2012 |
| Vascular endothelial growth factor in gingival crevicular fluid around dental implants.                                                                                                                       | Mierzwinska-Nastalska, Elzbieta; Lomzynski, L.; Jaworska-Zaremba, M.; Kostrzewa-Janicka, J.                                                                                        | 2010 |
| Microbiological findings and host response in patients with peri-implantitis.                                                                                                                                 | Hultin, Margareta; Gustafsson, Anders; Hallstrom, Hadar; Johansson, L.-A.; Ekfeldt, Anders; Klinge, Bjorn                                                                          | 2002 |
| CrossLaps and beta-glucuronidase in peri-implant and gingival crevicular fluid.                                                                                                                               | Schubert, U.; Kleber, B. M.; Strietzel, F. P.; Dorfling, P.                                                                                                                        | 2001 |
| Vascular endothelial growth factor and microvessel density around healthy and failing dental implants.                                                                                                        | Cornelini, R.; Artese, L.; Rubini, C.; Fioroni, M.; Ferrero, G.; Santinelli, A.; Piattelli, A.                                                                                     | 2001 |
| Macrophage polarization in aseptic bone resorption around dental implants induced by Ti particles in a murine model.                                                                                          | Wang, Xin; Li, Yu; Feng, Yuan; Cheng, Haode; Li, Dehua                                                                                                                             | 2019 |
| Clinical utility of a genetic susceptibility test for severe chronic periodontitis: a critical evaluation.                                                                                                    | Greenstein, Gary; Hart, Thomas C.                                                                                                                                                  | 2002 |
| C-telopeptide pyridinoline cross-links (ICTP) and periodontal pathogens associated with endosseous oral implants.                                                                                             | Oringer, R. J.; Palys, M. D.; Iranmanesh, A.; Fiorellini, J. P.; Haffajee, A. D.; Socransky, S. S.; Giannobile, W. V.                                                              | 1998 |
| Correlations between clinical parameters and interleukin-6 and interleukin-10 levels in saliva from totally edentulous patients with peri-implant disease.                                                    | Liskmann, Stanislav; Vihalemm, Tiit; Salum, Olev; Zilmer, Kersti; Fischer, Krista; Zilmer, Mihkel                                                                                  | 2006 |
| Soluble RANKL in crevicular fluid of dental implants: a pilot study.                                                                                                                                          | Monov, Gabriel; Strbac, Georg D.; Baron, Monika; Kandler, Barbara; Watzek, Georg; Gruber, Reinhard                                                                                 | 2006 |
| Early colonization of non-submerged dental implants in patients with a history of advanced aggressive periodontitis.                                                                                          | De Boever, Annemarie L.; De Boever, Jan A.                                                                                                                                         | 2006 |

|                                                                                                                                                                                                     |                                                                                                                                                                                                                                                            |      |
|-----------------------------------------------------------------------------------------------------------------------------------------------------------------------------------------------------|------------------------------------------------------------------------------------------------------------------------------------------------------------------------------------------------------------------------------------------------------------|------|
| Sulcus fluid bone marker levels and the outcome of surgical treatment of peri-implantitis                                                                                                           | Wohlfahrt, J.C., Aass, AM, Granfeldt, F, Lyngstadaas, SP; Reseland, JE                                                                                                                                                                                     | 2014 |
| A controlled, cross-sectional exploratory study on markers for the plasminogen system and inflammation in crevicular fluid samples from healthy, mucositis and peri-implantitis sites               | Hall, J, Pehrson, NG, Ekestubbe, A, Jemt, T; Friberg, B                                                                                                                                                                                                    | 2015 |
| Detection of Prostaglandin E 2 and Matrix Metalloproteinases in Implant Crevicular Fluid.                                                                                                           | Aboyoussef, Hoda; Carter, Cristina; Jandinski, John J.; Panagakos, Fotinos S.                                                                                                                                                                              | 1998 |
| The determination of pH of peri-implant crevicular fluid around one-piece and two-piece dental implants: A pilot study                                                                              | Karpavicius, Dainius; Stasikelyte, Morta; Baseviciene, Nomeda; Sakalauskaite, Urte; Ratkute, Saule; Razukevicius, Dainius                                                                                                                                  | 2019 |
| Analyses of clinical and osteoimmunological parameters on keratinized mucosa around dental implants                                                                                                 | Sukuroglu E.; Baltacioglu E.                                                                                                                                                                                                                               | 2019 |
| Prospective controlled clinical study investigating long-term clinical parameters, patient satisfaction, and microbial contamination of zirconia implants                                           | Lorenz J.; Giuliani N.; Hölscher W.; Schwietz A.; Schwarz F.; Sader R.                                                                                                                                                                                     | 2019 |
| Survival of adjacent-dental-implants in prediabetic and systemically healthy subjects at 5-years follow-up                                                                                          | Alrabiah M.; Alrahlah A.; Al-Hamdan R.S.; Al-Aali K.A.; Labban N.; Abduljabbar T.                                                                                                                                                                          | 2019 |
| Clinical indices and local levels of inflammatory biomarkers in peri-implant health of obese and nonobese individuals                                                                               | Alasqah M.N.; Al-Shibani N.; Al-Aali K.A.; Qutub O.A.; Abduljabbar T.; Akram Z.                                                                                                                                                                            | 2019 |
| Influence of restorative margins position on one-stage laser-microgrooved implants-supported single screwed crowns: A clinical, biochemical, and microbiological analysis                           | Guarnieri R.; Di Nardo D.; Gaimari G.; Miccoli G.; Testarelli L.                                                                                                                                                                                           | 2019 |
| Could the biomarker levels in saliva help distinguish between healthy implants and implants with peri-implant disease? A systematic review                                                          | Gomes A.M.; Douglas-de-Oliveira D.W.; Oliveira Costa F.                                                                                                                                                                                                    | 2018 |
| Intraoral versus extraoral cementation of implant-supported single crowns: Clinical, biomarker, and microbiological comparisons                                                                     | Kıran B.; Toman M.; Buduneli N.; Lappin D.F.; Toksavul S.; Nizam N.                                                                                                                                                                                        | 2018 |
| Evaluation of gingival crevicular fluid and peri-implant sulcus fluid levels of periostin: A preliminary report                                                                                     | Akman A.C.; Buyukozdemir Askin S.; Guncu G.N.; Nohutcu R.M.                                                                                                                                                                                                | 2018 |
| Assessment of matrix metalloproteinase-8 and -9 levels in the peri-implant sulcular fluid among waterpipe (narghile) smokers and never-smokers with peri-implantitis                                | Al-Sowayh Z.H.; Aldamkh M.K.; Binmahfooz A.M.; Al-Aali K.A.; Akram Z.; Qutub O.A.; Javed F.; Abduljabbar T.                                                                                                                                                | 2018 |
| The effect of metal ions released from different dental implant-abutment couples on osteoblast function and secretion of bone resorbing mediators                                                   | Alrabeah G.O.; Brett P.; Knowles J.C.; Petridis H.                                                                                                                                                                                                         | 2017 |
| Associations of alveolar bone loss and interleukin-1 $\beta$ levels in one- and two-stage surgical procedures: a randomized prospective trial                                                       | Talo Yildirim T.; Acun Kaya F.; Yokus B.; Colak M.; Ozdemir Kaya E.; Tekin G.; Saribas E.; Uysal E.; Guncu G.N.                                                                                                                                            | 2017 |
| Comparison of two different techniques used for the maintenance of peri-implant soft tissue health: a pilot randomized clinical trial                                                               | Al Ghazal L.; O'Sullivan J.; Claffey N.; Polyzois I.                                                                                                                                                                                                       | 2017 |
| The role of IL-1 gene polymorphisms (IL1A, IL1B, and IL1RN) as a risk factor in unsuccessful implants retaining overdentures                                                                        | Sampaio Fernandes M.; Vaz P.; Braga A.C.; Sampaio Fernandes J.C.; Figueiral M.H.                                                                                                                                                                           | 2017 |
| Association of Cytokine Gene Polymorphism with Peri-implantitis Risk                                                                                                                                | Petkovic-Curcin A.; Zeljc K.; Cikota-Aleksic B.; Dakovic D.; Tatic Z.; Magic Z.                                                                                                                                                                            | 2017 |
| Prognosis of Dental Implants Immediately Placed in Sockets Affected by Peri-implantitis: A Retrospective Pilot Study                                                                                | Anitua E.; Piñas L.; Begoña L.; Alkhraisat M.H.                                                                                                                                                                                                            | 2017 |
| Oral infection with Porphyromonas gingivalis induces peri-implantitis in a murine model: Evaluation of bone loss and the local inflammatory response                                                | Tzach-Nahman R.; Mizraji G.; Shapira L.; Nussbaum G.; Wilensky A.                                                                                                                                                                                          | 2017 |
| Th17-related cytokines in mucositis: is there any difference between peri-implantitis and periodontitis patients?                                                                                   | Teixeira M.K.S.; Lira-Junior R.; Telles D.M.; Lourenço E.J.V.; Figueiredo C.M.                                                                                                                                                                             | 2017 |
| Comparison of Clinical, Radiographic, and Immunologic Inflammatory Parameters Around Dental Implants with Cement-Retained and Screw-Retained Restorations: A 5-Year Prospective Cohort Study in Men | Al Amri M.D.; Al-Rasheed A.S.; Al-Kheraif A.A.; Alfadda S.A.                                                                                                                                                                                               | 2017 |
| Peri-implant and Paracrestal Inflammatory Biomarkers at Failing Versus Surviving Implant Sites in a Beagle Dog Study                                                                                | Montero J.; Aragón F.; Blanco L.A.; Guadilla Y.; García-Cenador B.; López-Valverde A.                                                                                                                                                                      | 2017 |
| Use of platelet-rich fibrin in regenerative dentistry: a systematic review                                                                                                                          | Miron R.J.; Zucchelli G.; Pikos M.A.; Salama M.; Lee S.; Guillemette V.; Fujioka-Kobayashi M.; Bishara M.; Zhang Y.; Wang H.-L.; Chandad F.; Nacopoulos C.; Simonpieri A.; Aalam A.A.; Felice P.; Sammartino G.; Ghanaati S.; Hernandez M.A.; Choukroun J. | 2017 |
| Short Dental Implants Retaining Two-Implant Mandibular Overdentures in Very Old, Dependent Patients: Radiologic and Clinical Observation Up to 5 Years                                              | Maniewicz S.; Buser R.; Duvernay E.; Vazquez L.; Loup A.; Perneger T.V.; Schimmel M.; Müller F.                                                                                                                                                            | 2017 |
| Titanium ions form particles that activate and execute interleukin-1 $\beta$ release from lipopolysaccharide-primed macrophages                                                                     | Pettersson M.; Kelk P.; Belibasakis G.N.; Bylund D.; Molin Thorén M.; Johansson A.                                                                                                                                                                         | 2017 |
| Comparison of peri-implant clinical and radiographic inflammatory parameters and whole salivary destructive inflammatory cytokine profile among obese and non-obese men                             | Abduljabbar T.; Al-Sahaly F.; Kellesarian S.V.; Kellesarian T.V.; Al-Anazi M.; Al-Khatami M.; Javed F.; Vohra F.                                                                                                                                           | 2016 |
| Bone Response and Soft Tissue Changes Around Implants With/Without Abutments Supporting Fixed Partial Dentures: Results From a 3-Year, Prospective, Randomized, Controlled Study                    | Göthberg C.; André U.; Gröndahl K.; Thomsen P.; Slotte C.                                                                                                                                                                                                  | 2016 |
| Histopathological Verification of Osteoimmunological Mediators in Peri-Implantitis and Correlation to Bone Loss and Implant Functional Period                                                       | Konermann A.; Götz W.; Le M.; Dirk C.; Lossdörfer S.; Heinemann F.                                                                                                                                                                                         | 2016 |
| Association between tumor necrosis factor-alpha G-308A polymorphism and dental peri-implant disease risk A meta-analysis                                                                            | Mo Y.-Y.; Zeng X.-T.; Weng H.; Cen Y.; Zhao Q.; Wen X.                                                                                                                                                                                                     | 2016 |
| Effects of Abutment Removal and Reconnection on Inflammatory Cytokine Production Around Dental Implants                                                                                             | Kuppasamy M.; Watanabe H.; Kasugai S.; Kuroda S.                                                                                                                                                                                                           | 2015 |
| Clinical, microbiological, and immunological aspects of healthy versus peri-implantitis tissue in full arch reconstruction patients: a prospective cross-sectional study                            | Ata-Ali J.; Flichy-Fernández A.J.; Alegre-Domingo T.; Ata-Ali F.; Palacio J.; Peñarrocha-Diogo M.                                                                                                                                                          | 2015 |

|                                                                                                                                                                                                        |                                                                                                                                                                                           |      |
|--------------------------------------------------------------------------------------------------------------------------------------------------------------------------------------------------------|-------------------------------------------------------------------------------------------------------------------------------------------------------------------------------------------|------|
| Adherent endotoxin on dental implant surfaces: a reappraisal                                                                                                                                           | Morra M.; Cassinelli C.; Bollati D.; Cascardo G.; Bellanda M.                                                                                                                             | 2015 |
| Estimation of bone loss biomarkers as a diagnostic tool for peri-implantitis                                                                                                                           | Rakic M.; Struillou X.; Petkovic-Curcin A.; Matic S.; Canullo L.; Sanz M.; Vojvodic D.                                                                                                    | 2014 |
| Comparison of peri-implant crevicular fluid levels of adrenomedullin and human beta defensins 1 and 2 from mandibular implants with different implant stability quotient levels in nonsmoker patients  | Ertugrul A.S.; Tekin Y.; Alpaslan N.Z.; Bozoglan A.; Sahin H.; Dikilitas A.                                                                                                               | 2014 |
| Clinical, microbiological, and salivary biomarker profiles of dental implant patients with type 2 diabetes                                                                                             | Tatarakis N.; Kinney J.S.; Inglehart M.; Braun T.M.; Shelburne C.; Lang N.P.; Giannobile W.V.; Oh T.-J.                                                                                   | 2014 |
| Systemic risk factors for peri-implant bone loss: A systematic review and meta-analysis                                                                                                                | Clementini M.; Rossetti P.H.O.; Penarrocha D.; Micarelli C.; Bonachela W.C.; Canullo L.                                                                                                   | 2014 |
| Cytokines expression in saliva and peri-implant crevicular fluid of patients with peri-implant disease                                                                                                 | Fonseca F.J.; Moraes Junior M.; Lourenço E.J.; Teles D.d.e M.; Figueredo C.M.                                                                                                             | 2014 |
| Saliva versus peri-implant inflammation: quantification of IL-1 $\beta$ in partially and totally edentulous patients.                                                                                  | Rocha F.S.; Jesus R.N.; Rocha F.M.; Moura C.C.; Zanetta-Barbosa D.                                                                                                                        | 2014 |
| Effects of smoking on periimplant health status and IL-1 $\beta$ , TNF- $\alpha$ , and PGE2 levels in periimplant crevicular fluid: a cross-sectional study on well-maintained implant recall patients | Tatli U.; Damlar I.; Erdoğan O.; Esen E.                                                                                                                                                  | 2013 |
| Receptor activator of nuclear factor kappa B (RANK) as a determinant of peri-implantitis                                                                                                               | Rakic M.; Nikolic-Jakoba N.; Struillou X.; Petkovic-Curcin A.; Stamatović N.; Matić S.; Jankovic S.; Aleksic Z.; Vasilčić D.; Lekovic V.; Vojvodic D.                                     | 2013 |
| Comparison of soft tissue healing around implants in beagle dogs: Flap surgery versus flapless surgery                                                                                                 | Lei Q.; Chen J.; Jiang J.; Fu X.; Lin H.; Cai Z.                                                                                                                                          | 2013 |
| Tenascin-C and Matrix Metalloproteinase-9 Levels in Crevicular Fluid of Teeth and Implants                                                                                                             | Özçakir-Tomruk C.; Chiquet M.; Mericske-Stern R.                                                                                                                                          | 2012 |
| Gene Expression of Inflammation and Bone Healing in Peri-Implant Crevicular Fluid after Placement and Loading of Dental Implants. A Kinetic Clinical Pilot Study Using Quantitative Real-Time PCR      | Slotte C.; Lennerås M.; Göthberg C.; Suska F.; Zoric N.; Thomsen P.; Nannmark U.                                                                                                          | 2012 |
| Effect of inflammation on cytokine levels and bone remodelling markers in peri-implant sulcus fluid: A preliminary report                                                                              | Güncü G.N.; Akman A.C.; Günday S.; Yamalik N.; Berker E.                                                                                                                                  | 2012 |
| Current knowledge and perspectives for the use of Platelet-Rich Plasma (PRP) and Platelet-Rich Fibrin (PRF) in oral and maxillofacial surgery part 2: Bone graft, implant and reconstructive surgery   | Simonpieri A.; Del Corso M.; Vervelle A.; Jimbo R.; Inchingolo F.; Sammartino G.; Dohan Ehrenfest D.M.                                                                                    | 2012 |
| Patient-related risk factors for implant therapy. A critique of pertinent literature                                                                                                                   | Liddel G.; Klineberg I.                                                                                                                                                                   | 2011 |
| Patients with peri-implantitis, unlike those with a healthy periimplant microenvironment, display antibodies to more than one heat shock protein (HSP 27, HSP 65 and HSP 90) linear epitope            | Masuelli L.; Pompa G.; Fabrizi M.; Quaranta A.; Voza I.; Piccoli L.; Antonelli A.; Marzocchella L.; Di Carlo S.; Perrotti V.; Giganti M.G.; Piattelli A.; Quaranta M.; Modesti A.; Bei R. | 2011 |
| Expression of IL-6, IL-10, IL-17 and IL-8 in the peri-implant crevicular fluid of patients with peri-implantitis                                                                                       | Severino V.O.; Napimoga M.H.; De Lima Pereira S.A.                                                                                                                                        | 2011 |
| Proinflammatory cytokines in the crevicular fluid of patients with peri-implantitis                                                                                                                    | Javed F.; Al-Hezaimi K.; Salameh Z.; Almas K.; Romanos G.E.                                                                                                                               | 2011 |
| Tumor necrosis factor- $\alpha$ levels after surgical anti-infective mechanical therapy for peri-implantitis: A 12-month follow-up                                                                     | De Mendonga A.C.; Santos V.R.; Cesar-Neto J.B.; Duarte P.M.                                                                                                                               | 2009 |
| Changes in inflammatory mediators in peri-implant fluid after implant insertion                                                                                                                        | Venza M.; Visalli M.; Lo Giudice G.; Cicciù M.; Passi P.; Teti D.                                                                                                                         | 2009 |
| Possible impact of inflammatory status on C-telopeptide pyridinoline cross-links of Type I collagen and osteocalcin levels around oral implants with peri-implantitis: A controlled clinical trial     | Tümer C.; Aksoy Y.; Güncü G.N.; Nohutcu R.M.; Kilinc K.; Tözüm T.F.                                                                                                                       | 2008 |
| Microbiology and cytokine levels around healthy dental implants and teeth                                                                                                                              | Nowzari H.; Botero J.E.; DeGiacomo M.; Villacres M.C.; Rich S.K.                                                                                                                          | 2008 |
| Clinical consequences of IL-1 genotype on early implant failures in patients under periodontal maintenance                                                                                             | Jansson H.; Hamberg K.; De Bruyn H.; Bratthall G.                                                                                                                                         | 2005 |
| Levels and molecular forms of MMP-7 (matrilysin-1) and MMP-8 (collagenase-2) in diseased human peri-implant sulcular fluid                                                                             | Kivelä-Rajamäki M.; Maisi P.; Srinivas R.; Tervahartiala T.; Teronen O.; Husa V.; Salo T.; Sorsa T.                                                                                       | 2003 |

|                                                                                      |                                                                           |      |
|--------------------------------------------------------------------------------------|---------------------------------------------------------------------------|------|
| Orthodontic implants                                                                 |                                                                           |      |
| Orthodontic Mini-Implants                                                            | Lee, Jong Suk; Kim, Jung Kook; Park, Young-Chel; Vanarsdall Jr, Robert L. | 2007 |
| Restorative implant dentistry                                                        |                                                                           |      |
| Decision Making in Dental Implantology: Atlas of Surgical and Restorative Approaches | Tosta, Mauro; de Moura Filho, Gastão Soares; Chambrone, Leandro           | 2018 |
| Tissue engineering                                                                   |                                                                           |      |
| Composite Calcium Phosphate/Titania Scaffolds in Bone Tissue Engineering             | Dapporto, Massimiliano; Tampieri, Anna; Sprio, Simone                     | 2017 |
| In vitro study                                                                       |                                                                           |      |

|                                                                                                                                                                                |                                                                                                                                                                       |      |
|--------------------------------------------------------------------------------------------------------------------------------------------------------------------------------|-----------------------------------------------------------------------------------------------------------------------------------------------------------------------|------|
| Avaliação comparativa da microinfiltração bacteriológica na interface pilar/implante em implantes hexágono externo com 10 e 20 Ncm de torque                                   | Neves, Flávio Domingues; Carneiro, Thiago de Almeida Prado Naves; Prudente, Marcel Santana; Neto, João Paulo Silva; Penatti, Mário Paulo Amante; Prado, Ricardo Alves | 2010 |
| Synthesis, characterization, and bioactivity of SrTiO 3-incorporated titanium coating                                                                                          | Sahoo, Souvik; Sinha, Arijit; Balla, Vamsi Krishna; Das, Mitun                                                                                                        | 2018 |
| Effect of 308-nm excimer laser light on peri-implantitis-associated bacteria: an in vitro investigation.                                                                       | Deppe, Herbert; Horch, Hans-Henning; Schrod, Veit; Haczek, Cornelia; Miethke, Thomas                                                                                  | 2007 |
| Antimicrobial efficacy of photodynamic therapy using two different light sources on the titanium-adherent biofilms of Aggregatibacter actinomycetemcomitans: An in vitro study | Ghasemi M.; Etemadi A.; Nedaei M.; Chiniforush N.; Pourhajabagher M.                                                                                                  | 2019 |
| The effect of antimicrobial photodynamic therapy (APDT) and light-activated disinfection (LAD) on contaminated titanium and zirconia implants-in vitro study                   | Azizi B.; Budimir A.; Mehmeti B.; Kelmendi J.; Gabric D.                                                                                                              | 2017 |
| Investigation of the antimicrobial efficacy of various antiseptic agents applied in peri-implantitis clinical therapy on the streptococcus salivarius in vitro model           | Venkei A.; Ungvari K.; Turzo K.; Urban E.                                                                                                                             | 2017 |

|                                                                                                                                                                                                          |                                                                                                                                                                                                                                |      |
|----------------------------------------------------------------------------------------------------------------------------------------------------------------------------------------------------------|--------------------------------------------------------------------------------------------------------------------------------------------------------------------------------------------------------------------------------|------|
| In-vivo study                                                                                                                                                                                            |                                                                                                                                                                                                                                |      |
| Differenzierte Untersuchung der lokalen und systemischen Entzündungsreaktionen nach Implantation von Niedertemperatur-Plasmapolymer-modifizierten Titanplättchen im Tiermodell Ratte                     | Walschus, Uwe                                                                                                                                                                                                                  | 2013 |
| Vertical Bone Augmentation Using Deproteinized Bovine Bone Mineral, Absorbable Collagen Sponge, and Recombinant Human Bone Morphogenetic Protein-2: An In Vivo Study in Rabbits.                         | Kim, Yeon Jung; Scaf de Molon, Rafael; Horiguti, Fausto Rioiti; Piragine Contador, Guilherme; Antonio Coelho, Marco; Ibiapina Mascarenhas, Vinicius; Paula de Souza Faloni, Ana; Cirelli, Joni Augusto; Sendyk, Wilson Roberto | 2018 |
| Comparative in vivo study of commercially pure Ti implants with surfaces modified by laser with and without silicate deposition: Biomechanical and scanning electron microscopy analysis                 | Magro-Filho, Osvaldo; Nishioka, Renato S.; Sisti, Karin E.; Sonoda, Celso K.                                                                                                                                                   |      |
| Comparison between two antimicrobial protocols with or without guided bone regeneration in the treatment of peri-implantitis. A histomorphometric study in dogs                                          | Ramos U.D.; Suaid F.A.; Wikesjö U.M.E.; Susin C.; Taba M.; Novaes A.B.                                                                                                                                                         | 2017 |
| Simultaneous lateral bone augmentation and implant placement using a particulated synthetic bone substitute around chronic peri-implant dehiscence defects in dogs                                       | Jung U.-W.; Cha J.-K.; Vignoletti F.; Nuñez J.; Sanz J.; Sanz M.                                                                                                                                                               | 2017 |
| Effects of nano-hydroxyapatite/ polyetheretherketone-coated, sandblasted, large-grit, and acid-etched implants on inflammatory cytokines and osseointegration in a peri-implantitis model in beagle dogs | Yang H.-W.; Tang X.-S.; Tian Z.-W.; Wang Y.; Yang W.-Y.; Hu J.-Z.                                                                                                                                                              | 2017 |

|                                                                                                                                                     |                                                                                                                                            |      |
|-----------------------------------------------------------------------------------------------------------------------------------------------------|--------------------------------------------------------------------------------------------------------------------------------------------|------|
| Systematic review                                                                                                                                   |                                                                                                                                            |      |
| Relationship between oral microbiota and periodontal disease: A systematic review                                                                   | Patini, R.; Staderini, E.; Lajolo, C.; Lopetuso, L.; Mohammed, H.; Rimondini, L.; Rocchetti, V.; Franceschi, F.; Cordaro, M.; Gallenzi, P. | 2018 |
| Could the biomarker levels in saliva help distinguish between healthy implants and implants with peri-implant disease? A systematic review          | Gomes A.M.; Douglas-de-Oliveira D.W.; Oliveira Costa F.                                                                                    | 2018 |
| Effect of photodynamic and laser therapy in the treatment of peri-implant mucositis: A systematic review                                            | Albaker A.M.; ArRejaie A.S.; Alrabiah M.; Abduljabbar T.                                                                                   | 2018 |
| Efficacy of air polishing for the non-surgical treatment of peri-implant diseases: a systematic review                                              | Schwarz F.; Becker K.; Renvert S.                                                                                                          | 2015 |
| Non-surgical therapy for the management of peri-implantitis: A systematic review                                                                    | Muthukuru M.; Zainvi A.; Esplugues E.O.; Flemmig T.F.                                                                                      | 2012 |
| Peri-Implant Crevicular Fluid Analysis, Enzymes and Biomarkers: a Systematic Review.                                                                | Dursun, Erhan; Tozum, Tolga Fikret                                                                                                         | 2016 |
| Can peri-implant crevicular fluid assist in the diagnosis of peri-implantitis? A systematic review and meta-analysis.                               | Faot, Fernanda; Nascimento, Gustavo G.; Bielemann, Amalia M.; Campao, Thiago D.; Leite, Fabio R. M.; Quirynen, Marc                        | 2015 |
| Clinical outcomes of using lasers for peri-implantitis surface detoxification: a systematic review and meta-analysis                                | Mailoa J.; Lin G.-H.; Chan H.-L.; MacEachern M.; Wang H.-L.                                                                                | 2014 |
| Surgical management of peri-implantitis: a systematic review and meta-analysis of treatment outcomes                                                | Chan H.-L.; Lin G.-H.; Suarez F.; MacEachern M.; Wang H.-L.                                                                                | 2014 |
| Efficacy of mechanical debridement with adjunct antimicrobial photodynamic therapy for the management of peri-implant diseases: a systematic review | Vohra F.; Al-Rifaiy M.Q.; Lillywhite G.; Abu Hassan M.I.; Javed F.                                                                         | 2014 |
| Treatment of peri-implantitis: what interventions are effective? A Cochrane systematic review.                                                      | Esposito M.; Grusovin M.G.; Worthington H.V.                                                                                               | 2012 |

|                                                                                                                                                               |                                                                        |      |
|---------------------------------------------------------------------------------------------------------------------------------------------------------------|------------------------------------------------------------------------|------|
| Pre clinical studies                                                                                                                                          |                                                                        |      |
| Characteristics of Local Delivery Agents for Treating Peri-Implantitis on Dental Implant Surfaces: A Preclinical Study                                        | Lee J.-B.; Kweon H.H.-I.; Cho H.-J.; Kim C.-S.; Kim Y.-T.              | 2019 |
| The influence of different abutment materials on tissue regeneration after surgical treatment of peri-implantitis – a randomized controlled preclinical study | Moest T.; Wrede J.; Schmitt C.M.; Stamp M.; Neukam F.W.; Schlegel K.A. | 2017 |



| Study protocol                                                                                                                                                                               |                        |      |
|----------------------------------------------------------------------------------------------------------------------------------------------------------------------------------------------|------------------------|------|
| Titles                                                                                                                                                                                       | Autor/ID               | Year |
| Effect of photodynamic therapy with tolouidene blue photosensitizer on nonsurgical management of peri-implant mucosal inflammation and Its matrix metalloproteinase 8 and Cytokine Profile   | IRCT2016092411770N2    | 2017 |
| Treatment of periimplant mucositis with PerioChip®. A randomized controlled clinical trial                                                                                                   | DRKS00007821           | 2015 |
| Efficacy of regenerative surgical therapy using Er: YAG laser for peri-implantitis: a randomized controlled clinical trial                                                                   | JPRN-UMIN000026229     | 2017 |
| Clinical effect of three additional methods (two antimicrobial photodynamic therapy systems and chlorhexidine) to non-surgical treatment of peri-implantitis: a randomized prospective study | DRKS00011171           | 2017 |
| Multi-Center Phase 3 Trial of Minocycline HCl 1mg Microspheres for the Use in Subjects with Peri-Implantitis - NIRVANA                                                                       | EUCTR2007-005660-27-IT | 2008 |
| The Effect of Different Dental Implant Surface Characteristics on Immunological and Microbiological Parameters                                                                               | NCT03693196            | 2018 |
| Application of laser assisted anti-infection therapy for the gum disease around dental implants                                                                                              | IRCT201609281248N3     | 2016 |
| the effect of emdogain on peri-implant mucosal inflammation (PIMI)                                                                                                                           | IRCT2013060113543N1    | 2013 |
| Impact of a Triclosan-containing Toothpaste During the Progression of Experimental Peri-implant Mucositis                                                                                    | NCT03145610            | 2017 |

| No treatment provided for peri-implantitis                                                                                                                                                                                                    |                                                                                                                                                                                                                                            |                  |
|-----------------------------------------------------------------------------------------------------------------------------------------------------------------------------------------------------------------------------------------------|--------------------------------------------------------------------------------------------------------------------------------------------------------------------------------------------------------------------------------------------|------------------|
| Titles                                                                                                                                                                                                                                        | Authors                                                                                                                                                                                                                                    | Publication year |
| Meeting report: The 12th European oral microbiology workshop (EOMW) in Stockholm, Sweden                                                                                                                                                      | Belibasakis, Georgios N.; Curtis, Michael A.; Hajishengallis, George; Zaura, Egija                                                                                                                                                         | 2018             |
| Relationship between TNF- $\alpha$ , MMP-8, and MMP-9 levels in gingival crevicular fluid and the subgingival microbiota in periodontal disease                                                                                               | Romero-Castro, Norma Samanta; Vázquez-Villamar, Mirna; Muñoz-Valle, José Francisco; Reyes-Fernández, Salvador; Serna-Radilla, Victor Othón; García-Arellano, Samuel; Castro-Alarcón, Natividad                                             | 2019             |
| Investigating the oral micro biome in health and periodontal disease                                                                                                                                                                          | Galimanas, B. Vaia                                                                                                                                                                                                                         | 2014             |
| Possible impact of inflammatory status on C-telopeptide pyridinoline cross-links of Type I collagen and osteocalcin levels around oral implants with peri-implantitis: A controlled clinical trial                                            | Tümer C.; Aksoy Y.; Güncü G.N.; Nohutcu R.M.; Kiline K.; Tözüm T.F.                                                                                                                                                                        | 2008             |
| Dual Transcriptome Analysis of Host-bacterial Interactions in Peri-implant Health and Disease                                                                                                                                                 | Dabdoub, Shareef M.; Ganesan, Sukirth M.; Mariotti, Angelo J.; Ludden, Christopher W.; Kumar, Purnima S.                                                                                                                                   | 2016             |
| Association Between Clinical and Microbiologic Cluster Profiles and Peri-implantitis.                                                                                                                                                         | Canullo, Luigi; Peñarrocha, Miguel; Monje, Alberto; Catena, Andres; Wang, Hom-Lay; Peñarrocha, David                                                                                                                                       | 2017             |
| Reentry evaluation following treatment of peri-implantitis with a regenerative approach.                                                                                                                                                      | Froum, Stuart J.; Rosen, Paul S.                                                                                                                                                                                                           | 2014             |
| A Comparison Of IL-1 $\beta$ , E2 (Pge2), Pai-2 and Tnf-A Levels in Gingival Crevicular Fluid (Gcf) and Peri-Implant Crevicular Fluid (Picf) from Groups of Patients with Healthy Teeth, Healthy Implants, Periodontitis and Peri-Implantitis | Ketabi, A. R.; Friese, H.; Weber, H.                                                                                                                                                                                                       | 2017             |
| Effects of enamel matrix derivative on non-surgical management of peri-implant mucositis: a double-blind randomized clinical trial                                                                                                            | Kashefimehr A.; Pourabbas R.; Faramarzi M.; Zarandi A.; Moradi A.; Tenenbaum H.C.; Azarpazhooh A.                                                                                                                                          | 2017             |
| Analysis of CD15, CD57 and HIF-1 $\alpha$ in biopsies of patients with peri-implantitis.                                                                                                                                                      | de Araujo, Marcia Fernandes; Etchebehere, Renata Margarida; de Melo, Marcelo Luiz Ribeiro; Beghini, Marcela; Severino, Viviane Oliveira; de Castro Cobo, Eliangela; Rocha Rodrigues, Denise Bertulucci; de Lima Pereira, Sanivia Aparecida | 2017             |
| Microbiological and aMMP-8 findings depending on peri-implant disease in patients undergoing supportive implant therapy.                                                                                                                      | Ziebolz, Dirk; Schmalz, Gerhard; Gollasch, Daniel; Eickholz, Peter; Rinke, Sven                                                                                                                                                            | 2017             |
| Assessment of interleukin-1 $\beta$ , interleukin-6, and tumor necrosis factor- $\alpha$ levels in the peri-implant sulcular fluid among waterpipe (narghile) smokers and never-smokers with peri-implantitis.                                | Abduljabbar, Tariq; Akram, Zohaib; Vohra, Fahim; Warnakulasuriya, Saman; Javed, Fawad                                                                                                                                                      | 2018             |
| Interleukin-1 $\beta$ and interleukin-6 expression and gene polymorphisms in subjects with peri-implant disease.                                                                                                                              | Melo, Rafaela F.; Lopes, Beatriz M. V.; Shibli, Jamil A.; Marcantonio, Elcio Jr; Marcantonio, Rosemary Adriana C.; Galli, Gloria M. Thompson                                                                                               | 2012             |
| Neurogenic Inflammation in Periimplant and Periodontal Disease: A Case-Control Split-Mouth Study                                                                                                                                              | Sert S.; Sakallioğlu U.; Lütfoğlu M.; Aydoğdu A.; Acarel E.; Günaydin M.                                                                                                                                                                   | 2019             |
| Assessment of matrix metalloproteinase-8 and -9 levels in the peri-implant sulcular fluid among waterpipe (narghile) smokers and never-smokers with peri-implantitis                                                                          | Al-Sowayh Z.H.; Aldamkh M.K.; Binmahfooz A.M.; Al-Aali K.A.; Akram Z.; Qutub O.A.; Javed F.; Abduljabbar T.                                                                                                                                | 2018             |
| Interleukin-1 $\beta$ and interleukin-6 in peri-implant crevicular fluid and relationship with peri-implantitis                                                                                                                               | Badea F.C.; Caraiane A.; Balaban D.-P.; Grigorian M.; Bordeianu I.                                                                                                                                                                         | 2017             |
| A controlled, cross-sectional exploratory study on markers for the plasminogen system and inflammation in crevicular fluid samples from healthy, mucositis and peri-implantitis sites                                                         | Hall J.; Pehrson N.-G.; Ekestubbe A.; Jemt T.; Friberg B.                                                                                                                                                                                  | 2015             |

|                                                                                                                                |                                                                                                 |      |
|--------------------------------------------------------------------------------------------------------------------------------|-------------------------------------------------------------------------------------------------|------|
| CD14 and TNF $\alpha$ single nucleotide polymorphisms are candidates for genetic biomarkers of peri-implantitis                | Rakic M.; Petkovic-Curcin A.; Struillou X.; Matic S.; Stamatovic N.; Vojvodic D.                | 2015 |
| Cytokines expression in saliva and peri-implant crevicular fluid of patients with peri-implant disease                         | Fonseca F.J.; Moraes Junior M.; Lourenço E.J.; Teles Dd.e M.; Figueredo C.M.                    | 2014 |
| Interleukins 1 $\beta$ and 10 expressions in the periimplant crevicular fluid from patients with untreated periimplant disease | Casado P.L.; Canullo L.; De Almeida Filardy A.; Granjeiro J.M.; Barboza E.P.; Leite Duarte M.E. | 2013 |
| Clinical, microbiologic, and host response characteristics in patients with peri-implant mucositis                             | Ata-Ali J.; Flichy-Fernandez A.J.; Ata-Ali F.; Penarrocha-Diogo M.; Penarrocha-Diogo M.         | 2013 |
| Expression of Vascular Endothelial Growth Factor (VEGF) mRNA in healthy bone tissue around implants and in peri-implantitis    | Di Alberti L.; Rossetto A.; Albanese M.; D'Agostino A.; De Santis D.; Bertossi D.; Nocini P.F.  | 2013 |
| A controlled clinical exploratory study on genetic markers for peri-implantitis.                                               | Hall J.; Britse A.O.; Jemt T.; Friberg B.                                                       | 2011 |
| Microbiological findings and host response in patients with peri-implantitis.                                                  | Hultin M.; Gustafsson A.; Hallström H.; Johansson L.A.; Eklfeldt A.; Klinge B.                  | 2002 |

| No reference about biomarkers                                                                                                                                                                                                         |                                                                                                                                               |                  |
|---------------------------------------------------------------------------------------------------------------------------------------------------------------------------------------------------------------------------------------|-----------------------------------------------------------------------------------------------------------------------------------------------|------------------|
| Titles                                                                                                                                                                                                                                | Authors                                                                                                                                       | Publication year |
| Periimplantitis Treatment: Long-Term Comparison of Laser Decontamination and Implantoplasty Surgery                                                                                                                                   | Pommer B.; Haas R.; Mailath-Pokorny G.; Fürhauser R.; Watzek G.; Busenlechner D.; Müller-Kern M.; Kloodt C.                                   | 2016             |
| How do peri-implant mucositis and gingivitis respond to supragingival biofilm control - an intra-individual longitudinal cohort study                                                                                                 | Gomes S.C.; Corvello P.; Romagna R.; Müller L.H.; Angst P.D.; Oppermann R.V.                                                                  | 2015             |
| Exploring the microbiome of healthy and diseased peri-implant sites using Illumina sequencing                                                                                                                                         | Sanz-Martin I.; Doolittle-Hall J.; Teles R.P.; Patel M.; Belibasakis G.N.; Hämmerle C.H.F.; Jung R.E.; Teles F.R.F.                           | 2017             |
| Short-term clinical and microbiological evaluations of peri-implant diseases before and after mechanical anti-infective therapies                                                                                                     | Máximo M.B.; De Mendonça A.C.; Renata Santos V.; Figueiredo L.C.; Feres M.; Duarte P.M.                                                       | 2009             |
| Case Report Decontamination Using a Desiccant with Air Powder Abrasion Followed by Biphasic Calcium Sulfate Grafting: A New Treatment for Peri-Implantitis                                                                            | Lombardo, Giorgio; Corrocher, Giovanni; Rovera, Angela; Pighi, Jacopo; Marincola, Mauro; Lehrberg, Jeffrey; Nocini, Pier Francesco            | 2015             |
| Effectiveness of adjunctive antimicrobial photodynamic therapy in reducing peri-implant inflammatory response in individuals vaping electronic cigarettes: A randomized controlled clinical trial.                                    | Al Rifaiy, Mohammed Q.; Qutub, Osama A.; Alasqah, Mohammed N.; Al-Sowaygh, Zeyad H.; Mokeem, Sameer A.; Alrahlah, Ali                         | 2018             |
| Effectiveness of adjunctive antimicrobial photodynamic therapy in reducing peri-implant inflammatory response in individuals vaping electronic cigarettes: A randomized controlled clinical trial.                                    | Al Rifaiy, Mohammed Q.; Qutub, Osama A.; Alasqah, Mohammed N.; Al-Sowaygh, Zeyad H.; Mokeem, Sameer A.; Alrahlah, Ali                         | 2018             |
| Treatment of peri-implantitis using multiple applications of chlorhexidine chips: a double-blind, randomized multi-centre clinical trial.                                                                                             | Machtei, Eli E.; Frankenthal, Shai; Levi, Guy; Elimelech, Rina; Shoshani, Eyal; Rosenfeld, Olivia; Tagger-Green, Nirit; Shlomi, Benjamin      | 2012             |
| Adjunctive Effect of Modifying the Implant Supported-Prosthesis in the Treatment of Peri-Implant Mucositis                                                                                                                            | de Tapia B.; Mozas C.; Valles C.; Nart J.; Sanz M.; Herrera D.                                                                                | 2019             |
| Adjunctive photodynamic therapy improves the outcomes of peri-implantitis: a randomized controlled trial                                                                                                                              | Wang H.; Li W.; Zhang D.; Li W.; Wang Z.                                                                                                      | 2019             |
| Non-surgical therapeutic outcomes of peri-implantitis: 12-month results                                                                                                                                                               | Nart J.; Pons R.; Valles C.; Esmatges A.; Sanz-Martin I.; Monje A.                                                                            | 2019             |
| Efficacy of mechanical debridement with adjunctive probiotic therapy in the treatment of peri-implant mucositis in cigarette-smokers and never-smokers                                                                                | Alqahtani F.; Alqahtani M.; Shafqat S.S.; Akram Z.; Al-Kheraif A.A.; Javed F.                                                                 | 2019             |
| Treatment of peri-implant mucositis with a chitosan brush-A pilot randomized clinical trial                                                                                                                                           | Wohlfahrt J.C.; Aass A.M.; Koldslund O.C.                                                                                                     | 2019             |
| Adjunctive efficacy of diode laser in the treatment of peri-implant mucositis with mechanical therapy: A randomized clinical trial                                                                                                    | Aimetti M.; Mariani G.M.; Ferrarotti F.; Ercoli E.; Liu C.C.; Romano F.                                                                       | 2019             |
| Prospective longitudinal comparison study of surgical therapies for peri-implantitis: 3-year follow-up                                                                                                                                | Dalago H.R.; Perrotti V.; Torres de Freitas S.F.; Ferreira C.F.; Piattelli A.; Iaculli F.; Bianchini M.A.                                     | 2019             |
| Evaluation of the effect of probiotics in the treatment of peri-implant mucositis: a triple-blind randomized clinical trial                                                                                                           | Peña M.; Barallat L.; Vilarrasa J.; Vicario M.; Violant D.; Nart J.                                                                           | 2019             |
| Regenerative Therapy of Peri-Implantitis: Clinical and Radiologic Documentation of 16 Consecutive Patients With a Mean Follow-Up of 3 Years                                                                                           | Solakoglu Ö.; Filippi A.                                                                                                                      | 2019             |
| Evaluation of the bio-stimulatory effect of platelet rich fibrin augmented by diode LASER compared to platelet rich fibrin alone on dental implant replacing posterior mandibular teeth. Randomised clinical trial: Split mouth study | El Bahnasy Sleem S.S.M.; Zayet M.K.; El-Ghareeb T.I.; Kader Saleh H.A.                                                                        | 2019             |
| Surgical Therapy of Peri-Implantitis with Local Minocycline: A 6-Month Randomized Controlled Clinical Trial                                                                                                                           | Cha J.K.; Lee J.S.; Kim C.S.                                                                                                                  | 2019             |
| Clinical effects of the adjunctive use of a 0.03% chlorhexidine and 0.05% cetylpyridinium chloride mouth rinse in the management of peri-implant diseases: A randomized clinical trial                                                | Pulcini A.; Bollaín J.; Sanz-Sánchez I.; Figuero E.; Alonso B.; Sanz M.; Herrera D.                                                           | 2019             |
| Nonsurgical Treatment of Peri-implantitis Without Eliminating Granulation Tissue: A 3-Year Study                                                                                                                                      | Crespi R.; Marconcini S.; Crespi G.; Giammarinaro E.; Menchini Fabris G.B.; Barone A.; Covani U.                                              | 2019             |
| A topical desiccant agent in association with manual debridement in the initial treatment of peri-implant mucositis: A clinical and microbiological pilot study                                                                       | Lombardo G.; Signoriello A.; Corrocher G.; Signorello C.; Burlacchini G.; Pardo A.; Nocini P.F.                                               | 2019             |
| Effects of a toothpaste containing 0.3% triclosan in the maintenance phase of peri-implantitis treatment: 2-Year randomized clinical trial                                                                                            | Stewart B.; Shibli J.A.; Araujo M.; Figueiredo L.C.; Panagakos F.; Matarazzo F.; Mairink R.; Onuma T.; Faveri M.; Retamal-Valdes B.; Feres M. | 2018             |

|                                                                                                                                                                                                  |                                                                                                           |      |
|--------------------------------------------------------------------------------------------------------------------------------------------------------------------------------------------------|-----------------------------------------------------------------------------------------------------------|------|
| Effect of antimicrobial photodynamic therapy in open flap debridement in the treatment of peri-implantitis: A randomized controlled trial                                                        | Albaker A.M.; ArRejaie A.S.; Alrabiah M.; Al-Aali K.A.; Mokeem S.; Alasqah M.N.; Vohra F.; Abduljabbar T. | 2018 |
| Vancomycin and tobramycin impregnated mineralized allograft for the surgical regenerative treatment of peri-implantitis: a 1-year follow-up case series                                          | Nart J.; de Tapia B.; Pujol A.; Pascual A.; Valles C.                                                     | 2018 |
| The effect of photodynamic therapy on pathogenic bacteria around peri-implant sulcus and in the cavity between abutment and implant after healing phase: A prospective clinical study            | Zhou L.-Y.; Shi J.-Y.; Zhu Y.; Qian S.-J.; Lai H.-C.; Gu Y.-X.                                            | 2018 |
| Clinical and microbiological evaluation of the effect of Lactobacillus reuteri in the treatment of mucositis and peri-implantitis: A triple-blind randomized clinical trial                      | Galofré M.; Palao D.; Vicario M.; Nart J.; Violant D.                                                     | 2018 |
| Regenerative surgical therapy for peri-implantitis using deproteinized bovine bone mineral with 10% collagen, enamel matrix derivative and Doxycycline-A prospective 3-year cohort study         | Mercado F.; Hamlet S.; Ivanovski S.                                                                       | 2018 |
| Surgical treatment of peri-implantitis using enamel matrix derivative, an RCT: 3- and 5-year follow-up                                                                                           | Ished C.; Svenson B.; Lundberg P.; Holmlund A.                                                            | 2018 |
| Effect of photodynamic therapy with toluidine blue photosensitizer on nonsurgical management of peri-implant mucosal inflammation                                                                | Mehr A.K.; Pourabbas R.; Khajeh M.S.                                                                      | 2018 |
| A new multiple anti-infective non-surgical therapy in the treatment of peri-implantitis: A case series                                                                                           | Mensi M.; Scotti E.; Calza S.; Pilloni A.; Grusovin M.G.; Mongardini C.                                   | 2017 |
| Surgical treatment of peri-implantitis: 3-year results from a randomized controlled clinical trial                                                                                               | Carcuac O.; Derks J.; Abrahamsson I.; Wennström J.L.; Petzold M.; Berglundh T.                            | 2017 |
| Surgical treatment of peri-implantitis intrabony lesions by means of deproteinized bovine bone mineral with 10% collagen: 7-year-results                                                         | Roccuzzo M.; Pittoni D.; Roccuzzo A.; Charrier L.; Dalmasso P.                                            | 2017 |
| Open flap debridement of peri-implantitis with or without adjunctive systemic antibiotics: A randomized clinical trial                                                                           | Hallström H.; Persson G.R.; Lindgren S.; Renvert S.                                                       | 2017 |
| Association Between Clinical and Microbiologic Cluster Profiles and Peri-implantitis                                                                                                             | Canullo L.; Peñarrocha M.; Monje A.; Catena A.; Wang H.-L.; Peñarrocha D.                                 | 2017 |
| A novel approach to treat peri implantitis with the help of PRF                                                                                                                                  | Shah R.; Shah H.; Shetty O.; Mistry G.                                                                    | 2017 |
| Role of mechanical curettage with and without adjunct antimicrobial photodynamic therapy in the treatment of peri-implant mucositis in cigarette smokers: A randomized controlled clinical trial | Javed F.; BinShabaib M.S.; Alharthi S.S.; Qadri T.                                                        | 2017 |
| Effect of a chlorhexidine-containing brush-on gel on peri-implant mucositis                                                                                                                      | Hallström H.; Lindgren S.; Twetman S.                                                                     | 2017 |
| The Comparison of Porous Titanium Granule and Xenograft in the Surgical Treatment of Peri-Implantitis: A Prospective Clinical Study                                                              | Guler B.; Uraz A.; Yalim M.; Bozkaya S.                                                                   | 2017 |
| Adjunctive efficacy of probiotics in the treatment of experimental peri-implant mucositis with mechanical and photodynamic therapy: a randomized, cross-over clinical trial                      | Mongardini C.; Pilloni A.; Farina R.; Di Tanna G.; Zeza B.                                                | 2017 |
| Effect of Nd:YAG laser-assisted non-surgical mechanical debridement on clinical and radiographic peri-implant inflammatory parameters in patients with peri-implant disease                      | Abduljabbar T.; Javed F.; Kellesarian S.V.; Vohra F.; Romanos G.E.                                        | 2017 |
| Effect of mechanical debridement with and without adjunct antimicrobial photodynamic therapy in the treatment of peri-implant diseases in prediabetic patients                                   | Abduljabbar T.                                                                                            | 2017 |
| Effect of mechanical debridement with adjunct antimicrobial photodynamic therapy in the treatment of peri-implant diseases in type-2 diabetic smokers and non-smokers                            | Abduljabbar T.                                                                                            | 2017 |
| Peri-Implant Mucositis and Peri-Implantitis: A Current Understanding of Their Diagnosis, Clinical Implications, and a Report of Treatment Using a Combined Therapy Approach                      | Poli P.P.; Ciccio M.; Beretta M.; Maiorana C.                                                             | 2017 |
| The use of hyaluronic acid as an adjuvant in the management of peri-implantitis                                                                                                                  | Lopez M.A.; Manzulli N.; D'Angelo A.; Lauritano D.; Papalia R.; Candotto V.                               | 2017 |
| Efficacy of periimplant mechanical debridement with and without adjunct antimicrobial photodynamic therapy in the treatment of periimplant diseases among cigarette smokers and non-smokers      | Javed F.; Abduljabbar T.; Carranza G.; Gholamiazizi E.; Mazgaj D.K.; Kellesarian S.V.; Vohra F.           | 2016 |
| Efficacy of 0.12% Chlorhexidine Gluconate for Non-Surgical Treatment of Peri-Implant Mucositis                                                                                                   | Menezes K.M.; Fernandes-Costa A.N.; Silva-Neto R.D.; Calderon P.S.; Gurgel B.C.                           | 2016 |
| Efficiency of photodynamic therapy in the treatment of peri-implantitis – A three-month randomized controlled clinical trial                                                                     | Rakašević D.; Lazić Z.; Rakonjac B.; Soldatović I.; Janković S.; Magić M.; Aleksić Z.                     | 2016 |
| Efficacy of periimplant mechanical debridement with and without adjunct antimicrobial photodynamic therapy in patients with type 2 diabetes mellitus                                             | Al Amri M.D.; Kellesarian S.V.; Ahmed A.; Al-Kheraif A.A.; Romanos G.E.; Javed F.                         | 2016 |
| Adjunctive Systemic and Local Antimicrobial Therapy in the Surgical Treatment of Peri-implantitis: A Randomized Controlled Clinical Trial                                                        | Carcuac O.; Derks J.; Charalampakis G.; Abrahamsson I.; Wennström J.; Berglundh T.                        | 2016 |
| Clinical, Radiographic and Microbiological Evaluation of High Level Laser Therapy, a New Photodynamic Therapy Protocol, in Peri-Implantitis Treatment; A Pilot Experience                        | Caccianiga G.; Rey G.; Baldoni M.; Paiusco A.                                                             | 2016 |
| Non-surgical periodontal treatment of peri-implant diseases with the adjunctive use of diode laser: preliminary clinical study                                                                   | Lerario F.; Roncati M.; Gariffo A.; Attorresi E.; Lucchese A.; Galanakis A.; Palaia G.; Romeo U.          | 2016 |
| Periodontal and peri-implant microbiota in patients with healthy and inflamed periodontal and peri-implant tissues                                                                               | Zhuang L.-F.; Watt R.M.; Mattheos N.; Si M.-S.; Lai H.-C.; Lang N.P.                                      | 2016 |
| Comparison of two regenerative surgical treatments for peri-implantitis defect using natix alone or in combination with Bio-Oss and collagen membrane                                            | Arab H.; Shiezhadeh F.; Moeintaghavi A.; Anbiaei N.; Mohamadi S.                                          | 2016 |
| Full-mouth scaling and root planing combined with azithromycin to treat peri-implantitis                                                                                                         | Gomi K.; Matsushima Y.; Ujiie Y.; Shirakawa S.; Nagano T.; Kanazashi M.; Yashima A.                       | 2015 |
| The utilization of a diode laser in the surgical treatment of peri-implantitis. A randomized clinical trial                                                                                      | Papadopoulos C.A.; Vouras I.; Menexes G.; Konstantinidis A.                                               | 2015 |

|                                                                                                                                                                                                                         |                                                                                                      |      |
|-------------------------------------------------------------------------------------------------------------------------------------------------------------------------------------------------------------------------|------------------------------------------------------------------------------------------------------|------|
| Nonsurgical treatment of peri-implantitis using an air-abrasive device or mechanical debridement and local application of chlorhexidine. Twelve-month follow-up of a prospective, randomized, controlled clinical study | John G.; Sahm N.; Becker J.; Schwarz F.                                                              | 2015 |
| Implant decontamination with 2% chlorhexidine during surgical peri-implantitis treatment: a randomized, double-blind, controlled trial                                                                                  | de Waal Y.C.; Raghoobar G.M.; Meijer H.J.; Winkel E.G.; van Winkelhoff A.J.                          | 2015 |
| Adjunctive glycine powder air-polishing for the treatment of peri-implant mucositis: an observational clinical trial                                                                                                    | De Siena F.; Corbella S.; Taschieri S.; Del Fabbro M.; Francetti L.                                  | 2015 |
| Treatment of peri-implant mucositis using a glycine powder air-polishing or ultrasonic device: a randomized clinical trial                                                                                              | Riben-Grundstrom C.; Norderyd O.; André U.; Renvert S.                                               | 2015 |
| Effect of glycine powder air-polishing as an adjunct in the treatment of peri-implant mucositis: a pilot clinical trial                                                                                                 | Ji Y.-J.; Tang Z.-H.; Wang R.; Cao J.; Cao C.-F.; Jin L.-J.                                          | 2014 |
| Evaluation of an air-abrasive device with amino acid glycine-powder during surgical treatment of peri-implantitis                                                                                                       | Toma S.; Lasserre J.F.; Taieb J.; Brex M.C.                                                          | 2014 |
| Photodynamic therapy to treat periimplantitis                                                                                                                                                                           | Bombeckari G.P.; Guzzi G.; Gualini F.; Gualini S.; Santoro F.; Spadari F.                            | 2013 |
| The adjunctive use of light-activated disinfection (LAD) with FotoSan is ineffective in the treatment of peri-implantitis: 1-year results from a multicentre pragmatic randomised controlled trial.                     | Esposito M.; Grusovin M.G.; De Angelis N.; Camurati A.; Campailla M.; Felice P.                      | 2013 |
| Topical application of 1% chlorhexidine gel versus 0.2% mouthwash in the treatment of peri-implant mucositis. An observational study                                                                                    | De Siena F.; Francetti L.; Corbella S.; Taschieri S.; Del Fabbro M.                                  | 2013 |
| Nonsurgical antimicrobial photodynamic therapy in moderate vs severe peri-implant defects: a clinical pilot study                                                                                                       | Deppe H.; Mücke T.; Wagenpfeil S.; Kesting M.; Sculean A.                                            | 2013 |
| Anti-infective therapy of peri-implantitis with adjunctive local drug delivery or photodynamic therapy: Six-month outcomes of a prospective randomized clinical trial                                                   | Schär D.; Ramseier C.A.; Eick S.; Arweiler N.B.; Sculean A.; Salvi G.E.                              | 2013 |
| Four-year follow-up of combined surgical therapy of advanced peri-implantitis evaluating two methods of surface decontamination                                                                                         | Schwarz F.; Hegewald A.; John G.; Sahm N.; Becker J.                                                 | 2013 |
| The effect of subgingival ozone and/or hydrogen peroxide on the development of peri-implant mucositis: a double-blind randomized controlled trial                                                                       | McKenna D.F.; Borzabadi-Farahani A.; Lynch E.                                                        | 2013 |
| Clinical and microbiological characteristics of peri-implantitis cases: A retrospective multicentre study                                                                                                               | Charalampakis G.; Leonhardt A.; Rabe P.; Dahlén G.                                                   | 2012 |
| Combined surgical therapy of peri-implantitis evaluating two methods of surface debridement and decontamination. A two-year clinical follow up report                                                                   | Schwarz F.; John G.; Mainusch S.; Sahm N.; Becker J.                                                 | 2012 |
| Non-surgical treatment of peri-implantitis using an air-abrasive device or mechanical debridement and local application of chlorhexidine: A prospective, randomized, controlled clinical study                          | Sahm N.; Becker J.; Santel T.; Schwarz F.                                                            | 2011 |
| Microbiologic results after Non-surgical Erbium-doped:Yttrium, aluminum, and garnet laser or Air-abrasive treatment of Peri-implantitis: A randomized clinical trial                                                    | Persson G.R.; Roos-Jansåker A.-M.; Lindahl C.; Renvert S.                                            | 2011 |
| C-telopeptide pyridinoline crosslinks of type I collagen, soluble RANKL, and osteoprotegerin levels in crevicular fluid of dental implants with peri-implantitis: a case-control study.                                 | Arikan F.; Buduneli N.; Lappin D.F.                                                                  | 2011 |
| Anti-infective treatment of peri-implant mucositis: A randomised controlled clinical trial                                                                                                                              | Heitz-Mayfield L.J.A.; Salvi G.E.; Botticelli D.; Mombelli A.; Faddy M.; Lang N.P.                   | 2011 |
| Impact of the method of surface debridement and decontamination on the clinical outcome following combined surgical therapy of peri-implantitis: A randomized controlled clinical study                                 | Schwarz F.; Sahm N.; Iglhaut G.; Becker J.                                                           | 2011 |
| Treatment of peri-implantitis using an Er:YAG laser or an air-abrasive device: A randomized clinical trial                                                                                                              | Renvert S.; Lindahl C.; Jansåker A.-M.R.; Persson R.G.                                               | 2011 |
| Proinflammatory cytokines (IL-1 $\beta$ and TNF- $\alpha$ ) and chemokines (IL-8 and MIP-1 $\alpha$ ) as markers of peri-implant tissue condition                                                                       | Petković A.B.; Matić S.M.; Stamatović N.V.; Vojvodić D.V.; Todorović T.M.; Lazić Z.R.; Kozomara R.J. | 2010 |
| Mechanical non-surgical treatment of peri-implantitis: A double-blind randomized longitudinal clinical study. I: Clinical results                                                                                       | Renvert S.; Samuelsson E.; Lindahl C.; Persson G.R.                                                  | 2009 |
| Surgical anti-infective mechanical therapy for peri-implantitis: A clinical report with a 12-month follow-up                                                                                                            | Santos V.R.                                                                                          | 2009 |
| Mechanical and repeated antimicrobial therapy using a local drug delivery system in the treatment of peri-implantitis: A randomized clinical trial                                                                      | Renvert S.; Lessem J.; Dahlén G.; Renvert H.; Lindahl C.                                             | 2008 |
| Clinical and histological healing pattern of peri-implantitis lesions following non-surgical Treatment with an Er:YAG laser                                                                                             | Schwarz F.; Bieling K.; Nuesry E.; Sculean A.; Becker J.                                             | 2006 |
| Antimicrobial therapy using a local drug delivery system (Arestin®) in the treatment of peri-implantitis. I: Microbiological outcomes                                                                                   | Persson G.R.; Salvi G.E.; Heitz-Mayfield L.J.A.; Lang N.P.                                           | 2006 |
| Topical minocycline microspheres versus topical chlorhexidine gel as an adjunct to mechanical debridement of incipient peri-implant infections: A randomized clinical trial                                             | Renvert S.; Lessem J.; Dahlén G.; Lindahl C.; Svensson M.                                            | 2006 |
| Effects of non-surgical treatment modalities on peri-implantitis.                                                                                                                                                       | Tang Z.; Cao C.; Sha Y.; Lin Y.; Wang X.                                                             | 2002 |
| Treatment of peri-implantitis by local delivery of tetracycline. Clinical, microbiological and radiological results.                                                                                                    | Mombelli A.; Feloutzis A.; Brägger U.; Lang N.P.                                                     | 2001 |
| Lethal photosensitization for decontamination of implant surfaces in the treatment of peri-implantitis.                                                                                                                 | Dörtbudak O.; Haas R.; Bernhart T.; Mailath-Pokorny G.                                               | 2001 |
| Topical treatment of peri-implantitis with metronidazole dental gel 25%. Clinical analysis and microbiological control                                                                                                  | Stellini E.; Migliorato A.; Mazzoleni S.; Mottola A.; Lombardi L.; Favero G.A.                       | 2000 |
| Treatment of peri-implantitis: longitudinal clinical and microbiological findings--a case report.                                                                                                                       | Muller E.; González Y.M.; Andreana S.                                                                | 1999 |
| Peri-Implant Sulcus Fluid (PISF) Matrix Metalloproteinase (MMP) -8 Levels in Peri-Implantitis.                                                                                                                          | Thierbach, Rene; Maier, Kurt; Sorsa, Timo; Mantyla, Paivi                                            | 2016 |

|                                                                                                                                                                                                    |                                                                                                                      |      |
|----------------------------------------------------------------------------------------------------------------------------------------------------------------------------------------------------|----------------------------------------------------------------------------------------------------------------------|------|
| Effectiveness of adjunctive antimicrobial photodynamic therapy in reducing peri-implant inflammatory response in individuals vaping electronic cigarettes: A randomized controlled clinical trial. | Al Rifaiy, Mohammed Q.; Qutub, Osama A.; Alasqah, Mohammed N.; Al-Sowygh, Zeyad H.; Mokeem, Sameer A.; Alrahlah, Ali | 2018 |
|----------------------------------------------------------------------------------------------------------------------------------------------------------------------------------------------------|----------------------------------------------------------------------------------------------------------------------|------|
