# Supplementary material for: Biomarker Expression of Peri-Implantitis Lesions before and after Treatment: A Systematic Review
Source: MDPI journal article supplement (doi:10.3390/ijerph192114085), 2022-10-28
Supplement: s1 [file s1]

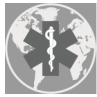

*Systematic review*

**Biomarker Expression of Peri-Implantitis Lesions Before and After Treatment: A Systematic Review.**

**Supplemental Table S3.** Risk of bias and applicability judgements in QUADAS-2. \* Low risk = ! ; High risk = + ; Unclear risk = ?

| Study                       | Risk of bias*         |            |                    |                 | Applicability concerns* |            |                    |
|-----------------------------|-----------------------|------------|--------------------|-----------------|-------------------------|------------|--------------------|
|                             | Participant Selection | Index test | Reference standard | Flow and timing | Participant Selection   | Index test | Reference standard |
| Bassetti et al., 2014       | !                     | +          | +                  | !               | !                       | !          | +                  |
| Bhavsar et al., 2019        | +                     | +          | !                  | !               | !                       | !          | !                  |
| De Mendonga et al., 2009    | +                     | ?          | +                  | !               | ?                       | ?          | +                  |
| Duarte et al., 2009         | +                     | +          | +                  | !               | ?                       | ?          | +                  |
| Esberg et al., 2019         | ?                     | ?          | !                  | !               | !                       | !          | !                  |
| Gershenfeld et al., 2018    | ?                     | +          | !                  | !               | !                       | !          | !                  |
| Granfeldt et al., 2010      | +                     | +          | +                  | !               | ?                       | ?          | +                  |
| Hallstrom et al., 2016      | !                     | +          | +                  | !               | !                       | !          | +                  |
| Kalos et al., 2015          | ?                     | +          | +                  | !               | !                       | !          | +                  |
| Komatsu et al., 2018        | !                     | +          | !                  | !               | !                       | !          | !                  |
| Malik et al., 2015          | +                     | +          | +                  | !               | ?                       | ?          | +                  |
| Peres Pimentel et al., 2019 | ?                     | +          | !                  | !               | !                       | !          | !                  |
| Renvert et al., 2017        | +                     | +          | ?                  | !               | !                       | !          | ?                  |
| Ribeiro et al., 2018        | ?                     | +          | +                  | !               | !                       | !          | +                  |
| Thierbach et al., 2016      | +                     | +          | +                  | !               | ?                       | ?          | ?                  |
| Wohlfahrt et al., 2014      | !                     | +          | +                  | !               | !                       | !          | ?                  |
| Hentenaar et al., 2021      | ?                     | +          | +                  | !               | !                       | !          | ?                  |
