# Supplementary material for: Biomarker Expression of Peri-Implantitis Lesions before and after Treatment: A Systematic Review
Source: MDPI journal article supplement (doi:10.3390/ijerph192114085), 2022-10-28
Supplement: s1 [file s1]

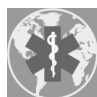

*Systematic review*

**Biomarker Expression of Peri-Implantitis Lesions Before and After Treatment: A Systematic Review.**

**Supplemental Table S1.** Primary outcome measures of included studies. SSD (Statistically significantly differences  $p < 0.05$ ), NSSD (No statistically significant differences  $p > 0.05$ ). Antibiotic, AF: access Flap, ALKP: Alkaline Phosphatase, AZM: Azithromycin, CCL- 5: Chemokine ligand- 5, CHX: Chlorhexidine, CRP: C- Reactive Protein, ELISA: enzyme-linked immunoassay, EMD: Enamel Matrix Derivative, F: Female, GM-CSF: Granulocyte Macrophage Colony-Stimulating Factor, IFN-g: Interferon- gamma, IL-1b: Interleukin-1beta, LILT: Low Intensity Laser Treatment, LDD: Local Drug Delivery, M: Male, MBL: Marginal Bone Loss, MC: Minocycline Hydrochloride, MCP-1 : Monocyte Chemotactic Protein-1, MIP: Macrophage Inflammatory Protein , MMP: Matrix Metallo Proteinase , MPO: Myeloperoxidase, MW: Mouthwash, n: number, NR: Not Reported, NSPT: Non-surgical periodontal treatment, NSSD: Not Statistically Significant Different, OC: Osteocalcin, OFD: Open Flap Debridement, OPG: Osteoprotegerin, OPN: Osteopontin, PCR: Polymerase Chain reaction, PDT: Photo Dynamic Therapy, PDGF: Platelet Derived Growth factor, pg: Picogram, PICF: Peri Implant Crevicular Fluid, PIM: peri-Implant Mucositis, PIP :Peri-implantitis, PIH: Peri-implant Health, RANK: Receptor Activator of Nuclear factor Kappa-B, RANKL: Receptor Activator of Nuclear factor Kappa-B Ligand, RANTES: Regulated on Activation, Normal T Cell Expressed and Secreted, RBL: Radiographic Bone Loss, rCAL: relative Clinical Attachment Loss, RCT: Randomised Clinical Trial, REC: Recession, SUP: Suppuration, SSD: Statistically Significant Difference, TNF: Tumour Necrosis Factor, TGF: Tissue Growth Factor, Ti: titanium, VEGF: Vascular.

| Investigator, year    | Study group | Biomarker concentration | Baseline | Final assessment | Comments*                                                            |
|-----------------------|-------------|-------------------------|----------|------------------|----------------------------------------------------------------------|
| Bassetti et al., 2014 | LDD         | IL-1b (pg/site)         | 11       | 4                | Final assessment 12 months post treatment.<br><br>SSD ( $P < 0.05$ ) |
|                       |             | IL-8 (pg/site)          | 20       | 11               | NSSD                                                                 |
|                       |             | IL-10 (pg/site)         | 24       | 7                | SSD ( $P < 0.05$ )                                                   |
|                       |             | MMP-1 (pg/site)         | 8        | 10               | NSSD                                                                 |
|                       |             | MMP-8 (ng/site)         | 0.75     | 0.55             | NSSD                                                                 |
|                       | a-PDT       | IL-1b (pg/site)         | 7        | 3                | SSD ( $P < 0.05$ )                                                   |
|                       |             | IL-8 (pg/site)          | 17       | 12               | NSSD                                                                 |
|                       |             | IL-10 (pg/site)         | 20       | 8                | SSD ( $P < 0.05$ )                                                   |
|                       |             | MMP-1 (pg/site)         | 11       | 5                | NSSD                                                                 |

|                          |                             |                     |                 |               |                                                                                          |
|--------------------------|-----------------------------|---------------------|-----------------|---------------|------------------------------------------------------------------------------------------|
|                          |                             | MMP-8 (ng/site)     | 0.6             | 0.45          | NSSD                                                                                     |
| Bhavsar et al., 2019     | PIH                         | IL1-b (pg/ $\mu$ L) | $1.7 \pm 2.9$   | -             | -                                                                                        |
|                          |                             | MMP-1 (pg/ $\mu$ L) | $1.3 \pm 1.1$   | -             | -                                                                                        |
|                          |                             | MMP-8 (pg/ $\mu$ L) | $10.7 \pm 9.7$  | -             | -                                                                                        |
|                          | AF + Anti-infective therapy | IL1-b (pg/ $\mu$ L) | $17.9 \pm 41.8$ | $5.3 \pm 8.2$ | Concentration reduced after treatment but still significantly higher than control group. |
|                          |                             | MMP-1 (pg/ $\mu$ L) | $1.2 \pm 1.2$   | $1.7 \pm 1.2$ | Similar concentration between 2 groups always.                                           |
|                          |                             | MMP-8 (pg/ $\mu$ L) | $12.1 \pm 10.0$ | $6.7 \pm 3.9$ | Significant reduction post treatment in test group but still higher than control group.  |
| De Mendonga et al., 2009 | PIP                         | TNF-a (pg/site)     | 2.8 – 3.0       | 0.4 – 0.9     | Final assessment was carried out 12 months after surgery<br>SSD                          |
| Duarte et al., 2009      | PIH                         | IL-12(pg/site)      | 12.5            | -             | NSSD                                                                                     |
|                          |                             | IL-4(pg/site)       | 0.5             | -             | NSSD                                                                                     |
|                          |                             | IL-10(pg/site)      | 80              | -             | NSSD                                                                                     |
|                          |                             | TNF-a(pg/site)      | 0               | -             | -                                                                                        |

|                     |           |                     |     |      |                                                                              |
|---------------------|-----------|---------------------|-----|------|------------------------------------------------------------------------------|
|                     |           | OPG (pg/site)       | 90  | -    | -                                                                            |
|                     |           | RANKL (pg/site)     | 40  | -    | -                                                                            |
|                     |           | OPG/RANKL           | 2.4 | -    | -                                                                            |
|                     | PIM       | IL-12(pg/site)      | 13  | 14   | NSSD                                                                         |
|                     |           | IL-4(pg/site)       | 0.2 | 0    | NSSD                                                                         |
|                     |           | IL-10(pg/site)      | 100 | 80   | NSSD                                                                         |
|                     |           | TNF-a(pg/site)      | 1   | 0    | SSD                                                                          |
|                     |           | OPG (pg/site)       | 83  | 83   | -                                                                            |
|                     |           | RANKL (pg/site)     | 45  | 43   | -                                                                            |
|                     |           | OPG/RANKL (pg/site) | 2.2 | 2.2  | -                                                                            |
|                     | PIP       | IL-12(pg/site)      | 15  | 11   | NSSD                                                                         |
|                     |           | IL-4(pg/site)       | 0.5 | 0.55 | NSSD                                                                         |
|                     |           | IL-10(pg/site)      | 80  | 85   | NSSD                                                                         |
|                     |           | TNF-a(pg/site)      | 3   | 0    | SSD before and after treatment, significantly higher in PIP compared to PIH. |
|                     |           | OPG (pg/site)       | 70  | 72   | SSD at baseline vs. PIH.                                                     |
|                     |           | RANKL (pg/site)     | 52  | 37   | -                                                                            |
|                     |           | OPG/RANKL (pg/site) | 2.1 | 2.3  | SSD between PIH and baseline in PIP.                                         |
| Esberg et al., 2019 | EMD group | Proteome analysis   | -   | -    |                                                                              |

|                          |                      |                     |      |      |                                                                                                                                                                                                                                                                       |
|--------------------------|----------------------|---------------------|------|------|-----------------------------------------------------------------------------------------------------------------------------------------------------------------------------------------------------------------------------------------------------------------------|
|                          | Non EMD group        |                     |      |      | EMD treatment significantly associated with a decreased prevalence of 40 PICF proteins.                                                                                                                                                                               |
| Gershenfeld et al., 2018 | AZM+ NSPT            | IL-1b (pg/mL)       | -    | -    | No raw data reported<br>Both treatment modalities resulted in reduced concentration of investigated biomarker.<br>NSSD between 2 groups.                                                                                                                              |
|                          | Placebo +NSPT        | IL-1b (pg/mL)       |      |      |                                                                                                                                                                                                                                                                       |
| Granfeldt et al., 2010   | OFD                  | MMP                 | -    | -    | No raw data reported<br>SSD in MMP-8 levels reduction after 12 months compared to before surgery. NSSD in MMP8 reduction between 2 groups.                                                                                                                            |
|                          | OFD + Ti             | MMP8                |      |      |                                                                                                                                                                                                                                                                       |
| Hallstrom et al., 2016   | Placebo              | IL-1b               | 17.1 | 8.2  | Final assessment at 12 weeks after treatment.<br>There was a tendency of reduced levels of the pro-inflammatory cytokines and chemokines during the intervention period in both investigated groups compared to baseline, but there were NSSD between the two groups. |
|                          |                      | IL-1RA <sub>d</sub> | 7.1  | 2.3  |                                                                                                                                                                                                                                                                       |
|                          |                      | IL-4                | 1.2  | 0.8  |                                                                                                                                                                                                                                                                       |
|                          |                      | IL-6                | 2.8  | 3.3  |                                                                                                                                                                                                                                                                       |
|                          |                      | IL-8                | 278  | 176  |                                                                                                                                                                                                                                                                       |
|                          |                      | IL-17A              | 3.9  | 1.9  |                                                                                                                                                                                                                                                                       |
|                          |                      | CCL5/ RANTES        | 8.6  | 3.2  |                                                                                                                                                                                                                                                                       |
|                          |                      | TNF- $\alpha$       | 2.7  | 1.8  |                                                                                                                                                                                                                                                                       |
|                          |                      | IFN- $\gamma$       | 97   | 36   |                                                                                                                                                                                                                                                                       |
|                          |                      | GM-CSF              | 0.2  | 0.4  |                                                                                                                                                                                                                                                                       |
|                          | Probiotic supplement | IL-1b               | 14.2 | 13.6 |                                                                                                                                                                                                                                                                       |

|                      |          |               |                      |                    |                                                                                                          |
|----------------------|----------|---------------|----------------------|--------------------|----------------------------------------------------------------------------------------------------------|
|                      |          | IL-1RAd       | 4.4                  | 3.5                |                                                                                                          |
|                      |          | IL-4          | 2.7                  | 0.5                |                                                                                                          |
|                      |          | IL-6          | 7.2                  | 2.5                |                                                                                                          |
|                      |          | IL-8          | 474                  | 251                |                                                                                                          |
|                      |          | IL-17A        | 11.3                 | 1.3                |                                                                                                          |
|                      |          | CCL5/ RANTES  | 8.6                  | 2.8                |                                                                                                          |
|                      |          | TNF-a         | 4.7                  | 1.2                |                                                                                                          |
|                      |          | IFN-g         | 278                  | 33                 |                                                                                                          |
|                      |          | GM-CSF        | 1.6                  | 0.1                |                                                                                                          |
| Kalos et al., 2015   | PIH      | IL1-b         | 10.301 (SD=1.150)    | -                  | Final assessment was carried out 6 months after therapy.<br><br>NSSD between 2 groups at any time point. |
|                      | NSPT+AZM | IL1-b         | 114.348 (SD=160.291) | 21.396 (SD=19.74)  |                                                                                                          |
|                      | NSPT     | IL1-b         | 85.919 (SD=77.072)   | 36.059 (SD=28.614) |                                                                                                          |
| Komatsu et al., 2018 | Laser    | IL-1a (ng/ml) | 5.05                 | 4.46               | Final assessment was 3 months after treatment.                                                           |
|                      |          | IL-1b (ng/ml) | 0.10                 | 0.05               | -                                                                                                        |
|                      |          | IL-6 (ng/ml)  | 0.93                 | 0.66               | -                                                                                                        |
|                      |          | IL-8 (ng/ml)  | 0.38                 | 0.36               | -                                                                                                        |

|                    |                             |                |       |         |                                                                                    |
|--------------------|-----------------------------|----------------|-------|---------|------------------------------------------------------------------------------------|
|                    |                             | TNF-a (ng/ml)  | 6.16* | 4.32    | *: Significantly higher in laser group compared to Minocycline group at baseline.  |
|                    |                             | CRP (ng/ml)    | 0.35  | 0.34    | -                                                                                  |
|                    |                             | MMP-1 (ng/ml)  | 0.09  | 0.07    | -                                                                                  |
|                    |                             | MMP-3 (ng/ml)  | 0.20  | 0.12    | -                                                                                  |
|                    |                             | MMP-9 (ng/ml)  | 9.84  | 9.84**  | ** : Significantly Lower in laser group compared to Minocycline group at 3 months. |
|                    |                             | MMP-13 (ng/ml) | 0.41  | 0.22    | -                                                                                  |
|                    | Minocycline                 | IL-1a (ng/ml)  | 3.57  | 5.22    | -                                                                                  |
|                    |                             | IL-1b (ng/ml)  | 0.04  | 0.95    | -                                                                                  |
|                    |                             | IL-6 (ng/ml)   | 0.00  | 0.00    | -                                                                                  |
|                    |                             | IL-8 (ng/ml)   | 0.16  | 0.29    | -                                                                                  |
|                    |                             | TNF-a (ng/ml)  | 2.95* | 4.91    | *: Significantly higher in laser group compared to Minocycline group at baseline.  |
|                    |                             | CRP (ng/ml)    | 0.32  | 0.28    | -                                                                                  |
|                    |                             | MMP-1 (ng/ml)  | 0.03  | 0.03    | -                                                                                  |
|                    |                             | MMP-3 (ng/ml)  | 0.17  | 0.08    | -                                                                                  |
|                    |                             | MMP-9 (ng/ml)  | 20.96 | 19.21** | ** : Significantly Lower in laser group compared to Minocycline group at 3 months. |
|                    |                             | MMP-13 (ng/ml) | 0.20  | 0.12    | -                                                                                  |
| Malik et al., 2015 | Healthy peri-implant tissue | ALKP           | 20    | -       | -                                                                                  |

|                             |                                                        |                             |                 |                  |                                                                                                                                                                                                                                                                                                                                                                                                                                                                                                                                                            |
|-----------------------------|--------------------------------------------------------|-----------------------------|-----------------|------------------|------------------------------------------------------------------------------------------------------------------------------------------------------------------------------------------------------------------------------------------------------------------------------------------------------------------------------------------------------------------------------------------------------------------------------------------------------------------------------------------------------------------------------------------------------------|
|                             | PIP + NSPT                                             | MPO                         | 4               | -                | -                                                                                                                                                                                                                                                                                                                                                                                                                                                                                                                                                          |
|                             |                                                        | ALKP                        | 58              | 20               | <p>Final assessment was 3 months after baseline.</p> <p>PIP group had SS higher MPO and ALKP at baseline and after 3 months compared to healthy sites (<math>P &lt; 0.001</math>) .</p>                                                                                                                                                                                                                                                                                                                                                                    |
|                             |                                                        | MPO                         | 18              | 7                |                                                                                                                                                                                                                                                                                                                                                                                                                                                                                                                                                            |
|                             |                                                        |                             |                 |                  |                                                                                                                                                                                                                                                                                                                                                                                                                                                                                                                                                            |
| Peres Pimentel et al., 2019 | Triclosan/fluoride toothpaste<br><br>Mean ( $\pm SD$ ) | IFN- $\gamma$ (pg/ $\mu$ l) | $3.0 \pm 3.6$   | $2.3 \pm 2.2$    | <p>Final assessment was made at 3 weeks' time.</p> <p>No intra- or inter-group differences were observed for IFN-<math>\gamma</math>, IL10, IL-1<math>\beta</math>, IL8, IL-17, IL-6, TNF-<math>\alpha</math>, MMP-2, MMP-9, TGF-<math>\beta</math>, OC, OPN, ICTP, OPG and RANKL (<math>p &gt; 0.05</math>).</p> <p>RANKL/OPG ratio was significantly higher in fluoride toothpaste-treated sites when compared to triclosan/fluoride-treated sites at the end of period without mechanical tooth brushing, on the 21st day (<math>p = 0.041</math>).</p> |
|                             |                                                        | IL-10 (pg/ $\mu$ l)         | $1.9 \pm 2.1$   | $1.9 \pm 2.4$    |                                                                                                                                                                                                                                                                                                                                                                                                                                                                                                                                                            |
|                             |                                                        | IL-17(pg/ $\mu$ l)          | $9.5 \pm 21.7$  | $1.9 \pm 1.4$    |                                                                                                                                                                                                                                                                                                                                                                                                                                                                                                                                                            |
|                             |                                                        | IL-1 $\beta$ (pg/ $\mu$ l)  | $38.4 \pm 48.9$ | $70.2 \pm 104.5$ |                                                                                                                                                                                                                                                                                                                                                                                                                                                                                                                                                            |
|                             |                                                        | IL-6 (pg/ $\mu$ l)          | $1.0 \pm 2.0$   | $1.9 \pm 3.6$    |                                                                                                                                                                                                                                                                                                                                                                                                                                                                                                                                                            |

|  |  |                        |                     |                     |  |
|--|--|------------------------|---------------------|---------------------|--|
|  |  |                        |                     |                     |  |
|  |  | IL-8 (pg/μl)           | 109.5 ± 275.1       | 48.7±145.5          |  |
|  |  | TNF-α (pg/μl)          | 2.9 ± 9.4           | 2.4 ± 5.9           |  |
|  |  | MMP-2 (pg/μl)          | 731.0 ± 806.1       | 1,030.8 ± 945.3     |  |
|  |  | MMP-9 (pg/μl)          | 20,631.5 ± 20,103.2 | 16,961.8 ± 17,064.1 |  |
|  |  | OPG (pg/μl)            | 53.2 ± 62.5         | 37.6 ± 31.5         |  |
|  |  | RANKL (pg/μl)          | 2.9 ± 1.7           | 1.9 ± 1.4           |  |
|  |  | RANKL/OPG (E1) (pg/μl) | 1.4 ± 1.6           | 0.8 ± 0.5           |  |
|  |  | OC (pg/μl)             | 708.7 ± 898.7       | 680.7 ± 767.7       |  |
|  |  | OPN (pg/μl)            | 509.2 ± 582.9       | 474.3 ± 484.5       |  |
|  |  | TGF-β(pg/μl)           | 5.5 ± 5.6           | 5.4 ± 3.1           |  |



|  |                                    |              |                     |                     |  |
|--|------------------------------------|--------------|---------------------|---------------------|--|
|  |                                    | ICTP (pg/μl) | 204.3 ± 194.7       | 197.4 ± 145.0       |  |
|  | Fluoride toothpaste<br>Mean (± SD) | IFN-γ(pg/μl) | 2.5 ± 2.9           | 2.1 ± 2.1           |  |
|  |                                    | IL-10(pg/μl) | 1.7 ± 2.2           | 1.1 ± 1.1           |  |
|  |                                    | IL-17(pg/μl) | 9.2 ± 23.9          | 2.7 ± 2.6           |  |
|  |                                    | IL-1β(pg/μl) | 55.3 ± 53.7         | 154.7 ± 364.8       |  |
|  |                                    | IL-6(pg/μl)  | 0.8 ± 2.4           | 0.1 ± 0.2           |  |
|  |                                    | IL-8(pg/μl)  | 77.0 ± 200.5        | 34.6± 77.5          |  |
|  |                                    | TNF-α(pg/μl) | 0.6 ± 1.2           | 0.6 ± 0.2           |  |
|  |                                    | MMP-2(pg/μl) | 1,310.6± 580.2      | 819.1 ± 524.7       |  |
|  |                                    | MMP-9(pg/μl) | 28,097.8 ± 22,041.1 | 59,899.2 ± 66,690.4 |  |
|  |                                    | OPG (pg/μl)  | 55.3 ± 46.9         | 34.4 ± 37.9         |  |

|                      |                |                        |               |                  |                                                                                                                                                                                                                                                                                                                                                                                                               |
|----------------------|----------------|------------------------|---------------|------------------|---------------------------------------------------------------------------------------------------------------------------------------------------------------------------------------------------------------------------------------------------------------------------------------------------------------------------------------------------------------------------------------------------------------|
|                      |                |                        |               |                  |                                                                                                                                                                                                                                                                                                                                                                                                               |
|                      |                | RANKL (pg/μl)          | 2.8 ± 1.7     | 3.5 ± 3.5        |                                                                                                                                                                                                                                                                                                                                                                                                               |
|                      |                | RANKL/OPG (E1) (pg/μl) | 0.9 ± 1.1     | 1.8 ± 1.5a       |                                                                                                                                                                                                                                                                                                                                                                                                               |
|                      |                | OC (pg/μl)             | 918.4 ± 772.3 | 1706.5 ± 1,474.2 |                                                                                                                                                                                                                                                                                                                                                                                                               |
|                      |                | OPN (pg/μl)            | 445.6 ± 324.8 | 1,089.8 ± 914.8  |                                                                                                                                                                                                                                                                                                                                                                                                               |
|                      |                | TGF-β(pg/μl)           | 7.3 ± 8.0     | 8.2± 8.7         |                                                                                                                                                                                                                                                                                                                                                                                                               |
|                      |                | ICTP (pg/μl)           | 449.9 ± 679.8 | 257.4 ± 258.6    |                                                                                                                                                                                                                                                                                                                                                                                                               |
| Renvert et al., 2017 | Stable outcome | IL-1β (pg/ml)          | 365.9         | 88.4             | <p>In methodology 10 biomarkers were assessed: IL-1b, IL-1ra (receptor antagonist) IL-6, IL-8, IL-17A, IP-10 MIP-1a , PDGFBB , TNF-a , and VEGF .however, only results of 5 of them reported. It is only reported that Statistical analysis failed to identify differences in cytokine levels for the remaining six cytokines assessed.</p> <p>Final assessment was carried out 6 months after treatment.</p> |

|  |                  |                       |       |       |                                                                                                                |
|--|------------------|-----------------------|-------|-------|----------------------------------------------------------------------------------------------------------------|
|  |                  |                       |       |       | Overall lower value compared to unstable patients (mean diff: 408.4, 95% CI: 153.9, 662.8, P = 0.002) .        |
|  |                  | IL-6 (pg/ml)          | 12.3  | 6.6   | Overall lower value compared to unstable patients (mean diff: 11.5, 95% CI: 3.4, 19.5, P = 0.007) .            |
|  |                  | VEGF (pg/ml)          | 507.9 | 242.3 | Overall lower value compared to unstable patients (mean diff: 326, 95% CI: 134.0, 518.2, P = 0.002)            |
|  |                  | TNF- $\alpha$ (pg/ml) | 4     | 4.8   | -                                                                                                              |
|  |                  | PDGFBB (pg/ml)        | 11.7  | 6.9   | -                                                                                                              |
|  | Unstable outcome | IL-1 $\beta$ (pg/ml)  | 376   | 496.7 | -                                                                                                              |
|  |                  | IL-6 (pg/ml)          | 43.2  | 18.1  | -                                                                                                              |
|  |                  | VEGF (pg/ml)          | 996.5 | 568.4 | -                                                                                                              |
|  |                  | TNF- $\alpha$ (pg/ml) | 17.1  | 8.2   | TNF-a levels at baseline were higher at those implants with unstable treatment outcome at 6 months (P < 0.01). |

|                      |           |                             |                 |                 |                                                                                                                                                                                                                                                                                                                                      |
|----------------------|-----------|-----------------------------|-----------------|-----------------|--------------------------------------------------------------------------------------------------------------------------------------------------------------------------------------------------------------------------------------------------------------------------------------------------------------------------------------|
|                      |           |                             |                 |                 |                                                                                                                                                                                                                                                                                                                                      |
|                      |           | PDGFBB (pg/ml)              | 30.4            | 12.9            | -                                                                                                                                                                                                                                                                                                                                    |
| Ribeiro et al., 2018 | Triclosan | INF- $\gamma$ (pg/ $\mu$ L) | 7.5 $\pm$ 14.4  | $\pm$ 3.1       | Final assessment was taken 3 weeks after treatment.<br><br>Different capital letters represent significant intergroup differences by Wilcoxon ( $P < 0.05$ ).<br><br>Different non-capital letters represent significant intragroup differences by Friedman ( $P < 0.05$ ).<br><br>No intra- or intergroup differences were observed |
|                      |           | IL-10 (pg/ $\mu$ L)         | 4.0 $\pm$ 5.4   | 3.8 $\pm$ 2.3   | -                                                                                                                                                                                                                                                                                                                                    |
|                      |           | IL-17<br>(pg/ $\mu$ L)      | 2.5 $\pm$ 2.3   | 2.0 $\pm$ 1.3   | No intra- or intergroup differences were observed.                                                                                                                                                                                                                                                                                   |
|                      |           | IL-1 $\beta$ (pg/ $\mu$ L)  | 21.3 $\pm$ 19.8 | 20.9 $\pm$ 17.8 | -                                                                                                                                                                                                                                                                                                                                    |
|                      |           | IL-4                        | 13.3 $\pm$ 21.7 | 19.0 $\pm$ 26.3 | No intra- or intergroup differences were observed.                                                                                                                                                                                                                                                                                   |

|  |  |                                      |                       |                       |                                                                                                                                                                     |
|--|--|--------------------------------------|-----------------------|-----------------------|---------------------------------------------------------------------------------------------------------------------------------------------------------------------|
|  |  | (pg/ $\mu$ L)                        |                       |                       |                                                                                                                                                                     |
|  |  | IL-6 (pg/ $\mu$ L)                   | $2.1 \pm 3.5$         | $3.2 \pm 2.9$         | No intra- or intergroup differences were observed.                                                                                                                  |
|  |  | IL-23 (pg/ $\mu$ L)                  | $0.1 \pm 0.3$         | $0.0 \pm 0.2$         | No intra- or intergroup differences were observed.                                                                                                                  |
|  |  | TNF- $\alpha$<br>MMP-2 (pg/ $\mu$ L) | $2.2 \pm 3.9$         | $1.3 \pm 1.2$         | No intra- or intergroup differences were observed.                                                                                                                  |
|  |  | MMP-2 (pg/ $\mu$ L)                  | $519.6 \pm 718.0$     | $771.7 \pm 674.5$     | No intra- or intergroup differences were observed.                                                                                                                  |
|  |  | MMP-9 (pg/ $\mu$ L)                  | $49515.5 \pm 99652.7$ | $32119.2 \pm 31704.5$ | No intra- or intergroup differences were observed.                                                                                                                  |
|  |  | OPG<br>(pg/ $\mu$ L)                 | $38.4 \pm 28.5$       | $178.5 \pm 145.8$     | Was significantly augmented from the 14th ( $P = 0.02$ ) until the 21st day ( $P = 0.034$ ) when compared with baseline and 7 days only in triclosan-treated sites. |

|  |         |                             |                   |                   |                                                                                                                                                                                                                                    |
|--|---------|-----------------------------|-------------------|-------------------|------------------------------------------------------------------------------------------------------------------------------------------------------------------------------------------------------------------------------------|
|  |         |                             |                   |                   |                                                                                                                                                                                                                                    |
|  |         | OC (pg/ $\mu$ L)            | 333.9 $\pm$ 373.3 | 164.1 $\pm$ 127.4 | No intra- or intergroup differences were observed.                                                                                                                                                                                 |
|  |         | OPN (pg/ $\mu$ L)           | 299.7 $\pm$ 391.5 | 538.0 $\pm$ 345.8 | No intra- or intergroup differences were observed.                                                                                                                                                                                 |
|  |         | TGF- $\beta$ (pg/ $\mu$ L)  | 18.2 $\pm$ 24.9   | 7.5 $\pm$ 6.8     | No intra- or intergroup differences were observed.                                                                                                                                                                                 |
|  |         | ICTP (pg/ $\mu$ L)          | 215.0 $\pm$ 360.3 | 156.1 $\pm$ 126.2 | No intra- or intergroup differences were observed.                                                                                                                                                                                 |
|  | Placebo | INF- $\gamma$ (pg/ $\mu$ L) | 5.7 $\pm$ 16.1    | 2.4 $\pm$ 5.1     | -                                                                                                                                                                                                                                  |
|  |         | IL-10 (pg/ $\mu$ L)         | 3.1 $\pm$ 4.2     | 0.9 $\pm$ 1.3     | IL-10 levels decreased only in placebo-treated implant sites, presenting significantly lower concentrations at 21 days when compared with baseline ( $P = 0.0051$ ) and compared with Triclosan group at 21 days ( $P = 0.0036$ ). |

|  |  |                                      |                 |                   |                                                                                                                                                                                                                                        |
|--|--|--------------------------------------|-----------------|-------------------|----------------------------------------------------------------------------------------------------------------------------------------------------------------------------------------------------------------------------------------|
|  |  |                                      |                 |                   |                                                                                                                                                                                                                                        |
|  |  | IL-17 (pg/ $\mu$ L)                  | 1.6 $\pm$ 1.9   | 2.5 $\pm$ 4.2     | -                                                                                                                                                                                                                                      |
|  |  | IL-1 $\beta$ (pg/ $\mu$ L)           | 14.9 $\pm$ 19.3 | 194.7 $\pm$ 226.1 | Increased during the progression of mucositis only in the placebo group, with significantly higher amounts at 21 days when compared with baseline ( $P = 0.041$ ).<br><br>No intergroup differences have been detected ( $P > 0.05$ ). |
|  |  | IL-4<br>(pg/ $\mu$ L)                | 12.5 $\pm$ 18.8 | 10.8 $\pm$ 12.7   | No intra- or intergroup differences were observed.                                                                                                                                                                                     |
|  |  | IL-6 (pg/ $\mu$ L)                   | 1.8 $\pm$ 2.6   | 5.6 $\pm$ 12.4    |                                                                                                                                                                                                                                        |
|  |  | IL-23 (pg/ $\mu$ L)                  | 0.1 $\pm$ 0.1   | 0.1 $\pm$ 0.2     |                                                                                                                                                                                                                                        |
|  |  | TNF- $\alpha$<br>MMP-2 (pg/ $\mu$ L) | 4.9 $\pm$ 15.8  | 0.9 $\pm$ 1.5     |                                                                                                                                                                                                                                        |

|  |  |                               |                       |                       |  |
|--|--|-------------------------------|-----------------------|-----------------------|--|
|  |  |                               |                       |                       |  |
|  |  | MMP-2<br>(pg/ $\mu$ L)        | 519.5 $\pm$ 423.1     | 558.7 $\pm$ 327.5     |  |
|  |  | MMP-9<br>(pg/ $\mu$ L)        | 25994.3 $\pm$ 28476.5 | 33481.8 $\pm$ 37594.3 |  |
|  |  | OPG (pg/ $\mu$ L)             | 66.6 $\pm$ 86.9       | 119.9 $\pm$ 179.3     |  |
|  |  | OC<br>(pg/ $\mu$ L)           | 444.1 $\pm$ 645.9     | 230.7 $\pm$ 192.5     |  |
|  |  | OPN (pg/ $\mu$ L)             | 462.6 $\pm$ 580.6     | 314.1 $\pm$ 314.8     |  |
|  |  | TGF- $\beta$<br>(pg/ $\mu$ L) | 10.9 $\pm$ 12.2       | 9.8 $\pm$ 19.8        |  |
|  |  | ICTP (pg/ $\mu$ L)            | 353.5 $\pm$ 449.3     | 195.1 $\pm$ 137.4     |  |



|                        |                          |                |              |                    |                   |                                                                                                                                               |
|------------------------|--------------------------|----------------|--------------|--------------------|-------------------|-----------------------------------------------------------------------------------------------------------------------------------------------|
|                        |                          |                |              |                    |                   |                                                                                                                                               |
| Thierbach et al., 2016 | Healthy/Gingivitis group | smokers        | MMP8 (ng/mL) | 40.2 (-11.7-92.1)  | 13.3 (-0.7-27.3)  | Final assessment was carried out 6 months after treatment.                                                                                    |
|                        |                          | Non-smokers    |              | 40.4 (-2-82.8)     | 5.5 (-2.6-13.6)   |                                                                                                                                               |
|                        | Periodontitis Group      | Smokers        | MMP8 (ng/mL) | 108.7 (22.6-194.8) | 27.0 (-12.4-66.4) | Broader MMP-8 levels' distribution in periodontitis group vs healthy/gingivitis sites.<br><br>P-value: 0.043                                  |
|                        |                          | Non smokers    |              | 141.8 (32.5-251.0) | 12.4 (0.62-24.2)  | P-Value: 0.047                                                                                                                                |
| Wohlfahrt et al., 2014 | OFD                      | MMP-8 (pg/ml)  | -            | -                  | -                 | No raw data for biomarkers in different groups were reported.                                                                                 |
|                        |                          | IL- 6 (pg/ml)  |              |                    |                   |                                                                                                                                               |
|                        |                          | OPG (pg/ml)    | -            | -                  | -                 | No difference in bone marker levels between the test and control group was found either at baseline or at 12 months ( $p > 0.05$ ).           |
|                        |                          | OC (pg/ml)     |              |                    |                   |                                                                                                                                               |
|                        |                          | Leptin (pg/ml) | -            | -                  | -                 | No difference between the test and control groups in change from baseline to 12 months for any of the bone markers was found ( $p > 0.05$ ) . |
|                        |                          | OPN (pg/ml)    |              |                    |                   |                                                                                                                                               |

|                        |                               |                                                        |                    |   |                                                                                                                                                                                                                                                                                                                                                                                                                   |
|------------------------|-------------------------------|--------------------------------------------------------|--------------------|---|-------------------------------------------------------------------------------------------------------------------------------------------------------------------------------------------------------------------------------------------------------------------------------------------------------------------------------------------------------------------------------------------------------------------|
|                        |                               | PTH (pg/ml)                                            | -                  | - | Comparing the levels between baseline and 12 months, irrespective of treatment group, TP, MMP-8 , IL-6, OPG , leptin and adiponectin were significantly reduced.                                                                                                                                                                                                                                                  |
|                        |                               | TNF-a (pg/ml)                                          |                    |   |                                                                                                                                                                                                                                                                                                                                                                                                                   |
|                        |                               | Adiponectin (pg/ml)                                    | -                  | - |                                                                                                                                                                                                                                                                                                                                                                                                                   |
|                        |                               | Insulin (pg/ml)                                        |                    |   |                                                                                                                                                                                                                                                                                                                                                                                                                   |
|                        | OFD+ porous titanium granules | MMP-8 (pg/ml)                                          | -                  | - | Comparing the levels between baseline and 12 months irrespective of treatment, the levels of OC, OPN, PTH, TNF- $\alpha$ and insulin were not changed.<br><br>Comparing the levels between baseline and 12 months, irrespective of treatment group, when Bonferroni corrections were applied, statistically significant differences were only present for leptin ( $p < 0.002$ ) and adiponectin ( $p < 0.001$ ). |
|                        |                               | IL- 6 (pg/ml)                                          |                    |   |                                                                                                                                                                                                                                                                                                                                                                                                                   |
|                        |                               | OPG (pg/ml)                                            | -                  | - |                                                                                                                                                                                                                                                                                                                                                                                                                   |
|                        |                               | OC (pg/ml)                                             |                    |   |                                                                                                                                                                                                                                                                                                                                                                                                                   |
|                        |                               | Leptin (pg/ml)                                         | -                  | - |                                                                                                                                                                                                                                                                                                                                                                                                                   |
|                        |                               | OPN (pg/ml)                                            |                    |   |                                                                                                                                                                                                                                                                                                                                                                                                                   |
|                        |                               | PTH (pg/ml)                                            | -                  | - |                                                                                                                                                                                                                                                                                                                                                                                                                   |
|                        |                               | TNF-a (pg/ml)                                          |                    |   |                                                                                                                                                                                                                                                                                                                                                                                                                   |
|                        |                               | Adiponectin (pg/ml)                                    | -                  | - |                                                                                                                                                                                                                                                                                                                                                                                                                   |
|                        |                               | Insulin (pg/ml)                                        |                    |   |                                                                                                                                                                                                                                                                                                                                                                                                                   |
| Hentenaar et al., 2021 | PIH                           | IL-1 $\beta$ (pg/ml) (median; (inter quartile range))  | 390.5 (87.0;555.5) | - | SSD between PIH and PIP at baseline (higher in PIP)                                                                                                                                                                                                                                                                                                                                                               |
|                        |                               | IL- 6 (pg/ml) (median; (inter quartile range))         | 20.3 (10.3;48.9)   | - | NSSD                                                                                                                                                                                                                                                                                                                                                                                                              |
|                        |                               | TNF- $\alpha$ (pg/ml) (median; (inter quartile range)) | 11.3 (7.8;16.6)    | - | NSSD                                                                                                                                                                                                                                                                                                                                                                                                              |

|  |     |                                                         |                           |                           |                                                     |
|--|-----|---------------------------------------------------------|---------------------------|---------------------------|-----------------------------------------------------|
|  |     | MCP-1 (pg/ml) (median; (Inter quartile range))          | 48.13(26.9;72.9)          | -                         | NSSD                                                |
|  |     | MIP-1 $\alpha$ (pg/ml) (median; (Inter quartile range)) | 15.63 (8.8;31.8)          | -                         | NSSD                                                |
|  |     | MMP-8 (pg/ml) (median; (Inter quartile range))          | 20590.2 (13512.4;26929.4) | -                         | SSD between PIH and PIP at baseline (higher in PIP) |
|  |     | OPG (pg/ml) (median; (Inter quartile range))            | 34.3 (19.3;53.0)          | -                         | NSSD                                                |
|  |     | G-CSF (pg/ml) (median; (Inter quartile range))          | 0.0 (0.0;16.7)            | -                         | NSSD                                                |
|  | PIP | IL-1 $\beta$ (pg/ml) (median; (interquartile range))    | 783.5 (414.0;2607.3)      | 738.5 (358.3;1516.8)      | NSSD                                                |
|  |     | IL- 6(pg/ml) (median; (inter quartile range))           | 30.6 (10.6;67.4)          | 38.5 (11.3;76.4)          | NSSD                                                |
|  |     | TNF- $\alpha$ (pg/ml) (median; (Inter quartile range))  | 13.0 (10.5;20.4)          | 11.5 (9.0;16.8)           | NSSD                                                |
|  |     | MCP-1 (pg/ml) (median; (Inter quartile range))          | 58.2 (40.3;92.8)          | 57.6 (40.0;120.3)         | NSSD                                                |
|  |     | MIP-1 $\alpha$ (pg/ml) (median; (Inter quartile range)) | 10.8 (7.2;17.9)           | 14.9 (9.4;30.0)           | SSD                                                 |
|  |     | MMP-8 (pg/ml) (median; (Inter quartile range))          | 34829.5 (24145.0;41791.5) | 36775.0 (23351.5;65973.3) | NSSD                                                |
|  |     | OPG (pg/ml) (median; (Inter quartile range))            | 33.9 (20.3;66.2)          | 32.4 (25.0;59.0)          | NSSD                                                |
|  |     | G-CSF (pg/ml) (median; (Inter quartile range))          | 0.0 (0.0;24.0)            | 32.3 (26.8;41.6)          | SSD                                                 |
