# Supplementary material for: Biomarker Expression of Peri-Implantitis Lesions before and after Treatment: A Systematic Review
Source: MDPI journal article supplement (doi:10.3390/ijerph192114085), 2022-10-28
Supplement: s1 [file s1]

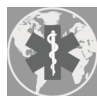

Systematic review

**Biomarker Expression Of Peri-Implantitis Lesions Before and After Treatment: A Systematic Review.**

**Supplemental Table S2.** Details of secondary outcomes of the included studies in the systematic review. *A.a*: *Aggregatibacter actinomycetemcomitans*, AB: Antibiotic, ALKP: Alkaline Phosphatase, AZM: Azithromycin, BI: Bleeding index, BOP: Bleeding on Probing, CAL: Clinical Attachment Loss, CCL- 5: Chemokine ligand- 5, CHX: Chlorhexidine, CRP: C- Reactive Protein, ELISA: enzyme-linked immunoassay, EMD: Enamel Matrix Derivative, F: Female, *F.n* *Fusobacterium nucleatum*, GI: Gingival index, GM-CSF: Granulocyte Macrophage Colony-Stimulating Factor, IFN-g: Interferon- gamma, IL-1b: Interleukin-1beta, LILT: Low Intensity Laser Treatment, LDD: Local Drug Delivery, M: Male, MBL: Marginal Bone Loss, MC: Minocycline Hydrochloride, MCP-1 : Monocyte Chemotactic Protein-1, MIP: Macrophage Inflammatory Protein , MMP: Matrix Metallo Proteinase , MPO: Myeloperoxidase, MW: Mouthwash, n: number, NR: Not Reported, NSPT: Non-surgical periodontal treatment, NSSD (No statistically significant differences  $p > 0.05$ ), OC: Osteocalcin, OFD: Open Flap Debridement, OPG: Osteoprotegerin, OPN: Osteopontin, PCR: Polymerase Chain reaction, PDT: Photo Dynamic Therapy, PDGF: Platelet Derived Growth factor, *P.g*: *Porphyromonas gingivalis*, PI: Plaque Index, PICF: Peri Implant Crevicular Fluid, PIM: peri-Implant Mucositis, PIP :Peri- implantitis, PIH: Peri-implant Health, RANK: Receptor Activator of Nuclear factor Kappa-B, RANKL: Receptor Activator of Nuclear factor Kappa-B Ligand, RBL: Radiographic Bone Loss, rCAL: relative Clinical Attachment Loss, RCT: Randomised Clinical Trial, REC: Recession, SSD (Statistically significantly  $p < 0.05$ ), SUP: Suppuration, *T.d*: *Treponema denticola*, *T.f*: *Tanarella forsythia*, Ti: titanium, TNF: Tumour Necrosis Factor, PPD: Probing Pocket Depth, TGF: Tissue Growth Factor, VEGF: Vascular Endothelial Growth Factor.

| Investigator, year           | Study group      | Time point | PPD (mm)<br>(Mean $\pm$ SD) | CAL (mm)<br>(Mean $\pm$ SD) | Recession<br>(mm) (Mean $\pm$ SD) | RBL (mm)<br>(Mean $\pm$ SD) | BOP (%)<br>(Mean $\pm$ SD) | SUP (%)<br>(Mean $\pm$ SD) | Plaque index<br>(%) (Mean $\pm$ SD) | Microbiome                                                                                                                                               | PICF volume | Others*                                                                                                                                                                                                                                                                                   |
|------------------------------|------------------|------------|-----------------------------|-----------------------------|-----------------------------------|-----------------------------|----------------------------|----------------------------|-------------------------------------|----------------------------------------------------------------------------------------------------------------------------------------------------------|-------------|-------------------------------------------------------------------------------------------------------------------------------------------------------------------------------------------------------------------------------------------------------------------------------------------|
| Bassetti et al.,<br><br>2014 | LDD<br>(Control) | Baseline   | 4.39 $\pm$ 0.77             | 2.72 $\pm$ 0.72             | 1.68 $\pm$ 1.04                   | -                           | 4.41 $\pm$ 1.47            | -                          | 0.21 $\pm$ 0.27                     | Except for <i>C. rectus</i> at baseline ( $P < 0.01$ ), the counts in submucosal biofilm were not SSD between test and control groups at any time point. | -           | - Mean BOP+ $\pm$ SD<br><br>- *: SS change from baseline to 3 months.<br><br>- †: SS change from baseline to 6 months.<br><br>- ‡: SS change from baseline to 9 months.<br><br>- §: SS change from baseline to 12 months.<br><br>- **: $P < 0.01$ compared with baseline (Wilcoxon test). |
|                              |                  | 12 months  | 3.83 $\pm$ 0.85<br><br>*†‡§ | 2.41 $\pm$ 0.70             | 1.41 $\pm$ 1.18<br><br>*†         | -                           | 1.55 $\pm$ 1.26<br><br>*†§ | -                          | 0.00 $\pm$ 0.00<br><br>*†‡§         |                                                                                                                                                          | -           |                                                                                                                                                                                                                                                                                           |
|                              | a-PDT<br>(Test)  | Baseline   | 4.19 $\pm$ 0.55             | 2.66 $\pm$ 0.73             | 1.53 $\pm$ 0.91                   | -                           | 4.03 $\pm$ 1.66            |                            | 0.13 $\pm$ 0.21                     | At baseline, the most frequently identified species                                                                                                      | -           |                                                                                                                                                                                                                                                                                           |

|                          |                                         |                        |                                |                      |                            |   |                     |             |                                 |                                                                                                                       |   |                                                                                                                                                     |
|--------------------------|-----------------------------------------|------------------------|--------------------------------|----------------------|----------------------------|---|---------------------|-------------|---------------------------------|-----------------------------------------------------------------------------------------------------------------------|---|-----------------------------------------------------------------------------------------------------------------------------------------------------|
|                          |                                         | 12 months              | 4.08 ± 0.81<br>(N = 19)<br>*†‡ | 2.58 ± 0.94 (N = 19) | 1.5 ± 0.86 (N = 19)<br>*†‡ | - | 1.74 ± 1.37<br>*†‡§ | -           | 0.01 ± 0.04<br>(N = 19)<br>*†‡§ | in the submucosal biofilm were <i>C. gingivalis</i> , <i>F. nucleatum</i> , <i>P. micra</i> and <i>T. forsythia</i> . | - |                                                                                                                                                     |
| Bhavsar et al., 2019     | PIH<br>(Control)                        | Baseline               | 2.56 ± 0.60                    | -                    | -                          | - | 20.8 (5/24)         | 0           | -                               | -                                                                                                                     | - |                                                                                                                                                     |
|                          |                                         | Post-surgery           | -                              | -                    | -                          | - | -                   | -           | -                               | -                                                                                                                     | - |                                                                                                                                                     |
|                          | AF+Anti-infective therapy               | Baseline               | 4.85 ± 1.38                    | -                    | -                          | - | 91.7 *<br>(22/24)   | 16.7 (4/24) | -                               | -                                                                                                                     | - | -                                                                                                                                                   |
|                          |                                         | Post-surgery           | 4.11 ± 1.27 *                  | -                    | -                          | - | 61.9 (13/21)<br>†   | 0†          | -                               | -                                                                                                                     | - | *: Statistically significant difference between groups are represented as ( <i>P</i> -value ≤ 0.05).<br><br>† SSD before and after Tx in test group |
| De Mendonga et al., 2009 | AF+ abrasive air powder + resin curette | Baseline               | 6.7 ± 1.2                      | -                    | -                          | - | 100                 | 30.0± 26.9  | -                               | -                                                                                                                     | - | -                                                                                                                                                   |
|                          |                                         | 12 months post-surgery | 4.3 ± 1.0*                     | 2.0 ± 0.64           | -                          | - | 26.6 ± 16.1*        | 0 *         | -                               | -                                                                                                                     | - | *: SSD from baseline to final assessment.<br><br>NSSD for - CAL red (mm), PPD reduction at 3 and 12 months.                                         |

|                          |                                                                                                                                                                                                              |                   |                                              |   |                                              |             |                                              |                                              |                                              |                                                                                                                                               |   |                                                                              |
|--------------------------|--------------------------------------------------------------------------------------------------------------------------------------------------------------------------------------------------------------|-------------------|----------------------------------------------|---|----------------------------------------------|-------------|----------------------------------------------|----------------------------------------------|----------------------------------------------|-----------------------------------------------------------------------------------------------------------------------------------------------|---|------------------------------------------------------------------------------|
| Duarte et al., 2009      | PIH                                                                                                                                                                                                          | Baseline          | 2.0 ± 0.4                                    | - | -                                            | -           | 4.0 ± 8.7                                    |                                              | 11.8 ± 10.3                                  | -                                                                                                                                             | - | Data reported for clinical parameters mean of full mouth data for PIH group. |
|                          |                                                                                                                                                                                                              | 3 months after TX | -                                            |   |                                              |             | -                                            | -                                            | -                                            |                                                                                                                                               |   | Data reported for PIM and PIP are reported in site level                     |
|                          | PIM                                                                                                                                                                                                          | Baseline          | 5.4 ± 1.4                                    | - | -                                            | -           | 93.3 ± 14.1                                  |                                              | 85.0 ± 24.18                                 | -                                                                                                                                             | - | *: SSD before and after Tx.                                                  |
|                          |                                                                                                                                                                                                              | 3 months post TX  | 3.9 ± 0.8 *                                  |   |                                              |             | 25.0 ± 41.0                                  |                                              | 28.3 ± 41.6 *†                               |                                                                                                                                               |   |                                                                              |
|                          | PIP                                                                                                                                                                                                          | Baseline          | 7.5 ± 2.2                                    | - | -                                            | -           | 100                                          |                                              | 90 ± 30.8                                    | -                                                                                                                                             | - | †: SSD before and after treatment                                            |
|                          |                                                                                                                                                                                                              | 3 months post TX  | 4.4 ± 1.1 *                                  |   |                                              |             | 52.5± 41.3 *                                 |                                              | 50 ± 39.4* †                                 |                                                                                                                                               |   |                                                                              |
| Esberg et al., 2019      | No raw data for secondary outcome reported in the study.<br><br>Cluster 2 of the proteome was associated with implant loss and BOP.<br><br>Cluster 3 was associated with implant survival and EMD treatment. |                   |                                              |   |                                              |             |                                              |                                              |                                              |                                                                                                                                               |   |                                                                              |
| Gershenfeld et al., 2018 | AZM+ NSPT                                                                                                                                                                                                    | Baseline          | Baseline data were counted as zero.<br><br>0 | - | Baseline data were counted as zero.<br><br>0 | 4.98 ± 1.24 | Baseline data were counted as zero.<br><br>0 | Baseline data were counted as zero.<br><br>0 | Baseline data were counted as zero.<br><br>0 | Orange complex had highest frequency at all times. Red complex bacteria had lowest frequency. NSSD in bacterial at baseline between 2 groups. |   | No raw data reported, estimation based on the presented graphs.              |
|                          |                                                                                                                                                                                                              | 6 months          | Mean change:<br><br>0                        | - | -1                                           | 4.77 ± 1.21 | -55                                          | -20                                          | -0.15                                        |                                                                                                                                               |   |                                                                              |
|                          | Placebo +NSPT                                                                                                                                                                                                | Baseline          | Baseline data were counted as zero 0         | - | Baseline data were counted as zero.          | 6.21 ± 1.57 | Baseline data were counted as zero.          | Baseline data were counted as zero.          | Baseline data were counted as zero.          |                                                                                                                                               | - | -                                                                            |

|                           |                                                      |          |                    |           |     |             |      |     |      |                                                                                                                                               |   |                                               |
|---------------------------|------------------------------------------------------|----------|--------------------|-----------|-----|-------------|------|-----|------|-----------------------------------------------------------------------------------------------------------------------------------------------|---|-----------------------------------------------|
|                           |                                                      |          |                    |           | 0   |             | 0    | 0   | 0    |                                                                                                                                               |   |                                               |
|                           |                                                      | 6 months | Mean change:<br>-1 | -         | 0.4 | 6.22 ± 1.39 | -20  | -18 | -0.4 |                                                                                                                                               | - |                                               |
| Granfeldt et al.,<br>2010 | No data for secondary outcome reported in the study. |          |                    |           |     |             |      |     |      |                                                                                                                                               |   |                                               |
| Hallstrom et al.,<br>2016 | Probiotic<br>supplement                              | Baseline | 4.3                | -         | -   | -           | 54   | 13  | 26   | NSSD over time between groups.<br><br>The most prevalent strains were<br><i>F.n.</i> , <i>P. micra</i> , <i>P. i</i> and <i>P. nigrescens</i> | - | - *: SSD compared to baseline                 |
|                           |                                                      | 26 weeks | 3.7                | -         | -   | -           | 14*  | 2   | 12   |                                                                                                                                               | - |                                               |
|                           | Placebo<br>supplement                                | Baseline | 4                  | -         | -   | -           | 58   | 5   | 32   |                                                                                                                                               | - |                                               |
|                           |                                                      | 26 weeks | 3.5                | -         | -   | -           | 17*  | 2   | 15   |                                                                                                                                               | - |                                               |
| Kalos et al., 2015        | AZM                                                  | Baseline | -                  | -         | -   | -           | -    | -   | -    | NSSD in treatment groups among<br>the effect of treatment in aerobic<br>and anaerobic bacterial count.                                        | - |                                               |
|                           |                                                      | 6 months |                    |           |     |             |      |     |      |                                                                                                                                               |   |                                               |
|                           | Placebo                                              | Baseline | -                  | -         | -   | -           | -    | -   | -    |                                                                                                                                               |   |                                               |
|                           |                                                      | 6 months |                    |           |     |             |      |     |      |                                                                                                                                               |   |                                               |
| Komatsu et al., 2018      | Laser<br>group                                       | Baseline | 6.6 ± 1.4          | 6.9 ± 1.5 | -   | -           | 94.4 | -   | -    | NSSD in both G+ and G- in laser<br>group at any time point.                                                                                   | - | - *: SSD from baseline to 1 months(P=0.002).  |
|                           |                                                      | 3 months | 6 ± 1.4 *†         | 6.4 ± 1.9 | -   | -           | 66.7 | -   | -    |                                                                                                                                               |   | - †: SSD from baseline to 3 months (P=0.007). |
|                           |                                                      | Baseline | 6.1 ± 1.2          | 6.3 ± 1.7 | -   | -           | 84.2 | -   | -    |                                                                                                                                               |   |                                               |

|                             |                               |          |           |                   |   |             |            |      |              |                                                                   |   |                                                                                                                                                                                                                                                                                                                                                                                                                                                                          |
|-----------------------------|-------------------------------|----------|-----------|-------------------|---|-------------|------------|------|--------------|-------------------------------------------------------------------|---|--------------------------------------------------------------------------------------------------------------------------------------------------------------------------------------------------------------------------------------------------------------------------------------------------------------------------------------------------------------------------------------------------------------------------------------------------------------------------|
|                             | Minocycline Group             | 3 months | 5.7 ± 2.0 | 6.2 ± 2.0         | - | -           | 63.2       | -    | -            | SSD decrease of all bacterial groups at 3 months after treatment. |   |                                                                                                                                                                                                                                                                                                                                                                                                                                                                          |
| Malik et al., 2015          | PIH                           | Baseline | 2         | -                 | - | -           | mBI<br>0.1 | -    | mPI<br>0.8   | -                                                                 | - | - No raw data reported, estimation carried out based on reported bar charts.                                                                                                                                                                                                                                                                                                                                                                                             |
|                             |                               | 3 months | -         | -                 | - | -           | -          | -    | -            | -                                                                 | - | -                                                                                                                                                                                                                                                                                                                                                                                                                                                                        |
|                             | PIP+NSPT                      | Baseline | 5.1       | -                 | - | -           | mBI<br>2.3 | -    | mPI<br>2.5   | -                                                                 | - | -                                                                                                                                                                                                                                                                                                                                                                                                                                                                        |
|                             |                               | 3 months | 4.8       | -                 | - | -           | mBI<br>0.7 | -    | mPI<br>0.7   | -                                                                 | - | -                                                                                                                                                                                                                                                                                                                                                                                                                                                                        |
| Peres Pimentel et al., 2019 | Triclosan/fluoride toothpaste | Baseline | 3.1 ± 1.0 | rCAL<br>9.0 ± 1.5 | - | -           | 0.0 ± 0.0  | -    | 6.9 ± 10.4c  | -                                                                 | - | <sup>a</sup> : Significant intra-group differences by the ANOVA/Tukey when compared to baseline ( $p < 0.05$ ).<br><sup>b</sup> : Significant inter-group differences by the ANOVA/ Tukey ( $p < 0.05$ ).<br><sup>c</sup> : Significant intra-group differences by the ANOVA/Tukey when compared to baseline and 3 days ( $p < 0.05$ ).<br><sup>d</sup> : Significant intra-group differences by the ANOVA/Tukey when compared to baseline, 3 and 7 days ( $p < 0.05$ ). |
|                             |                               | 3 weeks  | 2.7 ± 0.7 | rCAL<br>8.6 ± 1.3 | - | -           | 0.0 ± 0.0  | -    | 74.0 ± 19.1d | -                                                                 | - |                                                                                                                                                                                                                                                                                                                                                                                                                                                                          |
|                             | Fluoride toothpaste           | Baseline | 3.6 ± 0.5 | rCAL<br>9.2 ± 1.1 | - | -           | 0.0 ± 0.0  | -    | 9.8 ± 13.2   | -                                                                 | - |                                                                                                                                                                                                                                                                                                                                                                                                                                                                          |
|                             |                               | 3 weeks  | 3.7 ± 0.9 | rCAL<br>9.2 ± 1.1 | - | -           | 6.9 ± 16.8 | -    | 75.5 ± 17.7  | -                                                                 | - |                                                                                                                                                                                                                                                                                                                                                                                                                                                                          |
| Renvert et al., 2017        | Overall                       | Baseline | 6.4       | -                 | - | Bone level: | 100        | 41.5 | -            | -                                                                 | - | -                                                                                                                                                                                                                                                                                                                                                                                                                                                                        |

|                        |                               |          |                                       |           |   |                    |             |      |             |   |   |                                                                                                                                                                                                                    |
|------------------------|-------------------------------|----------|---------------------------------------|-----------|---|--------------------|-------------|------|-------------|---|---|--------------------------------------------------------------------------------------------------------------------------------------------------------------------------------------------------------------------|
|                        |                               |          |                                       |           |   | 5.6                |             |      |             |   |   |                                                                                                                                                                                                                    |
|                        |                               | 6 months | 5.5                                   | -         | - | Bone level:<br>5.8 | 63          | 12.2 | -           | - | - | -                                                                                                                                                                                                                  |
| Ribeiro et al., 2018   | Triclosan-fluoride toothpaste | Baseline | 3.1 ± 0.8                             | 8.9 ± 1.1 | - | -                  | 0.0 ± 0.0   | -    | 9.1 ± 14.3  | - | - | Different capital letters represent significant intergroup differences by ANOVA/Tukey ( $P < 0.05$ ).<br>Different non-capital letters represent significant intragroup differences by ANOVA/Tukey ( $P < 0.05$ ). |
|                        |                               | 3 weeks  | 3.6 ± 0.9                             | 9.2 ± 1.1 | - | -                  | 8.4 ± 10.1  | -    | 56.9 ± 19.0 | - | - |                                                                                                                                                                                                                    |
|                        | Fluoride toothpaste           | Baseline | 3.1 ± 1.2                             | 8.3 ± 1.2 | - | -                  | 0.0 ± 0.0   | -    | 12.8 ± 12.7 | - | - |                                                                                                                                                                                                                    |
|                        |                               | 3 weeks  | 3.4 ± 0.9                             | 8.9 ± 1.0 | - | -                  | 13.6 ± 17.2 | -    | 61.1 ± 23.7 | - | - |                                                                                                                                                                                                                    |
| Thierbach et al., 2016 | Healthy/Gingivitis            | Baseline | Total PD (Mean (SD))<br><br>2.9 (0.4) | -         | - | -                  | 15.8 (12.3) | -    | -           | - | - | -                                                                                                                                                                                                                  |
|                        |                               | 6 months | -                                     | -         | - | -                  | -           | -    | -           | - | - | -                                                                                                                                                                                                                  |
|                        | Periodontitis                 | Baseline | 3.5 (0.8)                             | -         | - | -                  | 28.3 (14.8) | -    | -           | - | - | -                                                                                                                                                                                                                  |
|                        |                               | 6 months | -                                     | -         | - | -                  | -           | -    | -           | - | - | -                                                                                                                                                                                                                  |

|                           |                                |                                                                                                                                                        |                   |   |   |                     |      |      |      |    |      |                                                                                                                 |
|---------------------------|--------------------------------|--------------------------------------------------------------------------------------------------------------------------------------------------------|-------------------|---|---|---------------------|------|------|------|----|------|-----------------------------------------------------------------------------------------------------------------|
| Wohlfahrt et al.,<br>2014 | PIP TX<br>with<br>porous Ti    | <p>No clinical data per group is reported in study.</p> <p>Overall no differences in clinical parameter between test and control group were found.</p> |                   |   |   |                     |      |      |      |    |      |                                                                                                                 |
|                           | PIP Tx<br>without<br>porous Ti |                                                                                                                                                        |                   |   |   |                     |      |      |      |    |      |                                                                                                                 |
| Hentenaar et al.,<br>2021 | PIH                            |                                                                                                                                                        | 1.9 ( $\pm 0.6$ ) | - | - | 0.56 ( $\pm 0.5$ )  | 3.4  | 0    | NR   | NR | 0.14 | SSD between PIH and PIP at baseline in terms of PPD and MBL, no SSD at baseline and after 3 months in PIP group |
|                           | PIP                            | Baseline                                                                                                                                               | 5.0 ( $\pm 1.1$ ) | - | - | 4.17 ( $\pm 1.75$ ) | 58.4 | 19.2 | 17.3 |    | 0.42 |                                                                                                                 |
|                           |                                | 3 months                                                                                                                                               | 4.7 ( $\pm 1.3$ ) | - | - | 4.24 ( $\pm 1.84$ ) | 47.5 | 20.8 | 6.6  |    | 0.39 |                                                                                                                 |
