# Supplementary material for: Biomarker Expression of Peri-Implantitis Lesions before and after Treatment: A Systematic Review
Source: Int J Environ Res Public Health. 2022 Oct 28;19(21):14085. doi: 10.3390/ijerph192114085 (PMC9659150; doi:10.3390/ijerph192114085)
Supplement: Supplementary file 1 [file ijerph-19-14085-s001.zip]

Archive with 4 entries (4 files):
- SM1_Table S1 _PrimaryOutcome.pdf
- SM2_Table S2_SecondaryOutcomes.pdf
- SM3_Table S3_RiskOfBias.pdf
- SM4_Table S4_ExcludedStudies .pdf
